# Supplementary material for: Global compositional and functional states of the human gut microbiome in health and disease
Source: Genome Res. 2024 Jun;34(6):967–78. doi: 10.1101/gr.278637.123 (PMC11293553; doi:10.1101/gr.278637.123)
Supplement: Supplement 1 [file Supplemental_Table_S1.xlsx]

## Sheet: Table S1
Dataset ID	N all samples	PMID	DOI	BioProject	country (three-letter codes)	N individual (ignoring multiple visits)	N control samples	N case samples	Sequencing platform
id45	645	31171880	doi:10.1038/s41591-019-0458-7	PRJDB4176	JPN	617	292	286 CRC, 67 adenoma	Illumina HiSeq
id11	110	27171425	doi:10.1371/journal.pone.0155362	PRJEB12449	USA	110	58	52 CRC	Illumina HiSeq
id40	41	29942096	doi:10.1038/s41591-018-0061-3	PRJEB14215	ITA	41		41 NAFLD	Illumina HiSeq
id40	32	29942096	doi:10.1038/s41591-018-0061-3	PRJEB14215	ESP	32		32 NAFLD	Illumina HiSeq
id06	122	28655159	doi:10.1093/gigascience/gix050	PRJEB15371	CHN	108	55	67 CD	Illumina HiSeq
id08	59	28449715	doi:10.1186/s13073-017-0428-y	PRJEB17784	GER	59	28	31 PD	Illumina HiSeq
id14	145	23719380	doi:10.1038/nature12198	PRJEB1786	SWE	145	43	49 IGT + 53 T2D	Illumina HiSeq
id12	54	28873967	doi:10.1093/gigascience/gix058	PRJEB18755	CHN	54	36	18 GDM	Illumina HiSeq
id17	39	20203603	doi:10.1038/nature08821	PRJEB2054	ESP	39	14	4 CD + 21 UC	Illumina GA
id51	57	30349083	doi:10.1038/s41564-018-0257-9	PRJEB20800	DNK	12	12	45 Abx treatment	Illumina HiSeq
id10	336	29018189	doi:10.1038/s41467-017-00900-1	PRJEB21528	CHN	336	122	214 ACVD	Illumina HiSeq
id26_id41	219	29097494	doi:10.1126/science.aan3706	PRJEB22863	FRA	106		118 NSCLC + 101 RCC	Thermo Fisher Ion Proton
id44	82	30936547	doi:10.1038/s41591-019-0406-6	PRJEB27928	GER	82	60	22 CRC	Illumina HiSeq
id43	15	30388453	doi:10.1016/j.cell.2018.10.029	PRJEB28687	THA	15	15		Illumina HiSeq
id43	40	30388453	doi:10.1016/j.cell.2018.10.029	PRJEB28687	USA	40	40		Illumina HiSeq
id27	90	34571050	doi:10.1016/j.jhep.2021.09.010	PRJEB38481	GBR	37		90 LC	Thermo Fisher Ion Proton
id29	48	34167645	doi:10.1016/j.jacc.2021.05.006	PRJEB38483	GBR	48	48		Thermo Fisher Ion Proton
id25	278	23985870	doi:10.1038/nature12506	PRJEB4336	DNK	278	114	164 obesity	Illumina GA
id20	237	25079328	doi:10.1038/nature13568	PRJEB6337	CHN	237	114	123 LC	Illumina HiSeq
id31	232	26214836	doi:10.1038/nm.3914	PRJEB6997	CHN	199	97	135 RA	Illumina HiSeq
id39	211	27818083	doi: 10.1016/j.cels.2016.10.004	PRJEB9584	GBR	211	211		Illumina HiSeq
id01	27	23212374	doi:10.1038/ncomms2266	PRJNA177201	SWE	27	15	12 atherosclerosis	Illumina HiSeq
id49	193	27409808	doi:10.1038/nature18927	PRJNA217052	FJI	193	193		Illumina HiSeq
id32	36	27172044	doi:10.1038/ncomms7505	PRJNA268964	PER	36	36		Illumina HiSeq
id32	22	27172044	doi:10.1038/ncomms7505	PRJNA268964	USA	22	22		Illumina HiSeq
id37	27	25981789	doi:10.1016/j.cub.2015.04.055	PRJNA278393	TAN	27	27		Illumina GA
id37	11	25981789	doi:10.1016/j.cub.2015.04.055	PRJNA278393	ITA	11	11		Illumina GA
id35	99	27723761	doi:10.1038/NMICROBIOL.2016.180	PRJNA289586	LUX	39	52	42 T1D / 5 T2D	Illumina HiSeq
id48	10	27881416	doi:10.1128/AEM.02577-16	PRJNA321753	USA	10		10 acute diarrhea	Illumina MiSeq
id38	37	28073918	doi:10.1101/gr.213256.116	PRJNA327106	USA	2		37 preterm /antibiotics	Illumina HiSeq
id33	110	27708392	doi:10.1038/srep34826	PRJNA328899	MGL	110	110		Illumina HiSeq
id52	98	31928124	doi:10.1080/19490976.2019.1700754	PRJNA356225	CHN	87	15	83 VKH	Illumina HiSeq
id53	131	28530702	doi:10.1038/nm.4345	PRJNA361402	ESP	40		131 T2D	Illumina NextSeq
id07	86	28467925	doi:10.1016/j.cmet.2017.04.001	PRJNA373901	USA	86		86 NAFLD	Illumina HiSeq
id09	97	28750650	doi 10.1186/s13059-017-1271-6	PRJNA375935	CHN	97		97 SPA	Illumina HiSeq
id34	100	28441964	doi:10.1186/s40168-017-0261-y	PRJNA379741	USA	100	50	50 ME/CFS	Illumina HiSeq
id50	110	30698687	doi:10.1093/gigascience/giz004	PRJNA397112	IND	110	110		Illumina NextSeq
id03	44	28923537	doi:10.1016/j.neo.2017.08.004	PRJNA397906	USA	39		44 melanoma	Illumina HiSeq
id02	370	23023125	doi:10.1038/nature11450	PRJNA422434	CHN	370	187	183 T2D	Illumina GA
id52	76	30077182	doi:10.1186/s40168-018-0520-6	PRJNA431482	CHN	76	52	24 BD	Illumina HiSeq
id46	140	30936548	doi:10.1038/s41591-019-0405-7	PRJNA447983	ITA	140	52	27 adenoma + 61 CRC	Illumina HiSeq
id36	465	28953883	doi:10.1038/nature23889	PRJNA48479	USA	214	465		Illumina HiSeq
id42	112	30661755	doi:10.1016/j.cell.2019.01.001	PRJNA485056	MDG	112	112		Illumina HiSeq
id21	8	20613793	doi:10.1038/ismej.2010.92	SRP006764	FIN	8	4	4 T1D	Illumina GA
id28	384	35349787	doi:10.1016/j.chom.2022.03.002	PRJEB38984	SWE	96			Illumina HiSeq
id100	128	26408641	doi:10.1136/gutjnl-2015-309800	PRJEB10878	CHN	128	54	74 CRC	Illumina HiSeq
id101	156	25432777	doi:10.15252/msb.20145645	PRJEB6070	FRA	156	61	42 adenoma + 53 CRC	Illumina HiSeq
id102	43	25432777	doi:10.15252/msb.20145645	PRJEB6070	GER	43	5	38 CRC	Illumina HiSeq
id103	156	25758642	doi:10.1038/ncomms7528	PRJEB7774	AUT	156	63	47 adenoma + 46 CRC	Illumina HiSeq
id104	30	31719139	doi:10.1128/mSystems.00438-19	PRJNA531273	IND	30		30 CRC	Illumina NextSeq

## Sheet: README
Supplemental Table S1. Description of the Human Gut Microbiome Atlas (HGMA) datasets used in this study. We show the overall statistics of HGMA datasets, including the total number of samples, BioProject IDs, sequencing platform, geography, and reference.
