# Supplementary material for: Global compositional and functional states of the human gut microbiome in health and disease
Source: Genome Res. 2024 Jun;34(6):967–78. doi: 10.1101/gr.278637.123 (PMC11293553; doi:10.1101/gr.278637.123)
Supplement: Supplement 2 [file Supplemental_Table_S2.xlsx]

## Sheet: Table S2
Category	species	Austria	China	Denmark	Fiji	Finland	France	India	Italy	Japan	Luxembourg	Madagascar	Mongolia	Peru	Spain	Sweden	Tanzania, United Republic of	Thailand	United Kingdom	United States of America
Z-score	Blastocystis sp. subtype 3	-0.366275	-0.278879	-0.202872	0.0397312	-0.374944	-0.346414	-0.210475	-0.364512	-0.35675	4.19655	-0.223929	-0.138923	-0.318771	-0.295141	-0.374944	0.172162	-0.0528718	-0.327972	-0.174768
Z-score	Blastocystis sp. subtype 1	-0.790103	-0.524865	1.10439	2.51754	-0.80251	-0.80251	0.280246	-0.80251	-0.61387	-0.789506	-0.395722	0.0218842	0.329274	-0.80251	-0.258752	0.770022	2.36375	-0.562865	-0.241383
Z-score	Bacteroides cellulosilyticus	-0.538372	-0.257847	0.57021	-0.687237	3.60427	0.201454	-0.66323	-0.431487	-0.261564	-0.29322	-0.701367	-0.471252	-0.711642	-0.368219	0.709164	-0.713009	-0.598911	0.872221	0.740034
Z-score	Blastocystis sp. subtype 2	-0.4581	-0.452627	3.02707	-0.356059	-0.461925	-0.333432	-0.434517	-0.127067	-0.461925	-0.461925	-0.426126	-0.441276	0.26597	-0.209096	-0.246024	2.70825	-0.461925	-0.245648	-0.423616
Z-score	Escherichia coli	0.200735	0.0794907	-0.262067	-0.200554	-0.839237	-0.297146	0.310429	-0.366508	-0.0662124	-0.72101	3.92181	-0.540462	-0.432749	-0.791598	0.414717	-0.113701	-0.701327	0.363056	0.0423394
Z-score	Blastocystis sp. subtype 4	-0.642304	-0.683803	0.724156	-0.687494	-0.687494	0.74054	-0.687494	-0.100795	-0.687494	1.33296	-0.687494	-0.687494	-0.687494	1.32672	2.84401	-0.687494	-0.687494	1.01186	-0.365896
Z-score	Bacteroides ovatus	-0.612255	0.0949631	0.146052	-0.675121	3.41724	-0.283201	0.00816861	-0.230232	-0.00912945	-0.0589634	-0.58052	-0.373424	-0.66101	-0.292031	-0.606145	-0.726893	-0.638939	0.0774591	2.00398
Z-score	Bacteroides intestinalis	-0.448646	1.67617	1.10277	-0.851222	-0.922406	0.178565	-0.664133	-0.391497	-0.276668	-0.199039	-0.891436	-0.425059	-0.907666	1.52143	0.0105665	-0.867145	-0.912954	2.47522	0.793155
Z-score	Clostridium bolteae	-0.365985	0.893424	-0.386807	-0.743055	1.88586	-0.0223776	-0.170729	0.516056	3.2204	-0.15555	-0.777537	0.131502	-0.76971	-0.497038	-0.494325	-0.77839	-0.704052	-0.337371	-0.444311
Z-score	Bacteroides fragilis 1	-0.998833	1.97903	0.794028	-1.06867	0.168412	-0.115976	0.31187	-0.622618	2.03195	0.479505	-0.0860032	0.135303	-1.12511	-1.01194	-0.797217	-1.08535	-0.873894	0.327391	1.55812
Z-score	Bacteroides thetaiotaomicron	-0.60329	0.639942	0.5559	-0.794232	3.48069	-0.128908	-0.520295	-0.565429	0.857126	-0.283883	-0.677281	0.00783531	-0.810073	-0.294744	-0.519678	-0.856497	-0.672368	0.151423	1.03376
Z-score	Parabacteroides distasonis	-0.858296	0.380841	0.903721	-1.04207	1.19205	0.432741	-0.766911	0.802694	2.54192	-0.207497	-1.06665	-0.716084	-1.12108	0.478243	-0.432055	-1.1856	-0.714988	0.106371	1.27266
Z-score	Ruminococcus bicirculans	0.467216	0.193445	0.412739	-0.960777	-1.26064	0.385521	-0.845926	0.426775	0.233788	0.154699	-1.15759	-0.947209	-1.17976	1.3107	2.11711	-1.21877	-0.247306	0.244887	1.87109
Z-score	Eisenbergiella tayi	0.568314	-0.236472	-0.487161	-0.896984	0.182031	0.141552	-0.86417	2.29964	-0.263419	-0.625638	-1.00475	-0.367196	-1.00475	1.06156	1.73524	-1.00475	-0.961847	1.67347	0.0553119
Z-score	Roseburia faecis	-0.175632	0.600032	0.695649	-0.638178	2.97135	0.272246	-0.531229	1.09668	-0.716357	0.44558	-0.000468522	0.0216832	-1.05991	-0.000703547	0.938751	-1.65318	-0.654626	-0.529428	-1.08226
Z-score	Bacteroides plebeius	-0.77541	2.56783	-0.265809	-0.791829	-0.793471	0.189031	0.436795	0.0764615	2.14025	0.328874	-0.785249	-0.775076	-0.793153	1.51099	-0.540522	-0.793471	-0.495455	-0.50558	0.064802
Z-score	Roseburia intestinalis	-0.193732	0.563613	1.05022	-0.851446	0.587256	0.960369	-0.711236	0.490624	0.762785	2.45444	-1.39571	-0.800252	-1.32568	0.686074	0.650323	-1.03208	-1.26839	-0.522025	-0.105157
Z-score	Clostridium sp. KLE 1755 & Clostridiales bacterium VE202-27	0.0672078	0.282888	0.0779274	-1.10713	1.14581	0.481451	0.915591	0.374148	-0.0474202	-0.985881	-1.10713	-0.840367	-1.10713	-0.334494	0.275722	-1.10713	-1.08899	2.00761	2.09732
Z-score	Bacteroides faecis	-0.0892776	-0.541053	0.845644	-0.888544	0.353641	0.530071	-0.884831	2.03093	-0.00315176	-0.56487	-0.888086	-0.848427	-0.720586	-0.327286	0.0249853	-0.888544	-0.58773	0.639538	2.80758
Z-score	Clostridium clostridioforme 1	-0.307371	-0.0283278	-0.136258	-0.676812	2.36709	-0.56996	0.459922	0.306803	2.88904	-0.628617	-0.687966	0.82009	-0.687966	-0.52399	-0.670159	-0.687966	-0.687966	-0.353267	-0.196317
Z-score	Bacteroides xylanisolvens	-0.644834	0.581304	0.215291	-0.710693	3.44786	0.0684154	0.188696	-0.50439	0.253808	0.319201	-0.800632	-0.649698	-0.82839	-0.633485	-0.336246	-0.828045	-0.593823	0.026178	1.42949
Z-score	Bacteroides finegoldii	-0.662246	1.41397	0.0775848	-0.79329	-0.885823	-0.165187	-0.474765	-0.406609	1.3766	1.04044	-0.774975	-0.678335	-0.884023	0.600917	-0.241704	-0.885823	-0.36413	-0.211952	2.91935
Z-score	Bacteroides caccae	-0.879152	0.50862	0.20108	-0.90287	1.2715	-0.117433	0.536641	-0.219416	0.514506	-0.443146	-1.14355	-0.735965	-1.13553	-0.129675	-0.0722445	-1.18953	-0.187904	1.17605	2.94802
Z-score	Hungatella hathewayi 2	-0.457426	0.938999	-0.0954793	-0.720432	3.08951	-0.610063	-0.275921	-0.232053	1.55522	-0.55841	-0.872415	1.15094	-0.826851	-0.784754	-0.455051	-0.856803	0.350915	-0.388792	0.0488709
Z-score	Akkermansia muciniphila	1.39091	-0.671498	-0.210004	-1.00313	0.855826	-0.106408	-0.00698811	0.405811	-0.272204	-0.396543	-0.995467	-0.518667	-0.63655	-0.0848911	0.974611	-1.07549	-0.993442	3.09804	0.246085
Z-score	Paraprevotella clara	-0.904477	0.562428	2.48409	-0.953861	-1.06838	0.694609	-0.0496429	0.606883	0.867098	-0.143483	-1.06537	-0.968632	-1.03953	-0.630913	0.585112	-1.06838	0.688279	-0.170427	1.5746
Z-score	Parabacteroides merdae	-0.739026	0.264131	0.609796	-0.89627	0.779588	-0.260265	-0.616695	0.487402	1.5046	-0.182395	-1.04367	0.0557722	-1.10506	-0.234921	-0.211779	-1.10612	-0.776274	0.440561	3.03063
Z-score	Parabacteroides goldsteinii	-0.718668	0.481302	-0.230946	-0.156354	-1.073	0.737389	-0.486177	0.349448	1.54128	-0.639665	-0.973716	-0.702866	-1.06713	1.94089	0.669403	-1.073	-0.863032	2.15193	0.112918
Z-score	Eubacterium eligens	-1.25754	1.52422	0.636113	0.057324	0.0966855	1.4278	-0.715415	0.074747	0.92033	-0.583784	-0.401425	-1.30601	-0.453498	2.29068	0.300686	-1.56913	0.333117	-0.633563	-0.741345
Z-score	Klebsiella pneumoniae	0.332784	0.943452	-0.506524	0.838848	-0.96952	-0.937403	2.70665	-0.796482	1.78451	0.696279	0.443531	-0.568168	-0.168784	-0.96952	-0.809194	-0.779807	-0.738491	-0.541157	0.0390013
Z-score	Bacteroides stercoris	-0.654569	2.30193	-0.0326002	-0.535189	-0.75023	-0.433793	-0.409289	-0.0026315	2.03483	0.323846	-0.743317	-0.332245	-0.749449	-0.600717	-0.554315	-0.75023	-0.462617	0.0823555	2.26823
Z-score	Alistipes onderdonkii	-0.357819	0.0475997	0.682453	-1.11144	1.1821	-0.520873	-0.966354	1.03022	0.0632889	-0.346983	-1.12747	1.30228	-1.13262	-0.379189	0.0705981	-1.13194	-0.976834	1.85613	1.81686
Z-score	Bacteroides fragilis 2	-0.649147	2.03335	-0.470798	0.59622	-0.678504	-0.536495	3.2733	-0.497839	0.483309	-0.517929	-0.0906856	0.0523222	-0.532778	-0.650034	-0.0321045	-0.678504	-0.572296	-0.206089	-0.325302
Z-score	Faecalibacterium sp. CAG:74	2.10901	-0.210518	0.475769	-0.57306	-1.0573	-0.18206	-0.803604	0.183403	-0.705828	-0.00361529	-0.929036	-0.132952	-0.160557	-0.578764	1.30884	-0.635643	-0.610562	2.79462	-0.288137
Z-score	Bacteroides dorei	-0.855368	0.127307	0.608608	-0.91911	3.48329	-0.231348	-0.355043	0.433499	0.951527	-0.148377	-0.761611	-0.85198	-0.910868	0.340429	-0.0900209	-0.921127	-0.504326	0.123942	0.480575
Z-score	Bacteroides eggerthii	-0.662909	2.06478	0.781867	-0.899692	-1.03358	0.37509	-0.88049	0.791772	0.95825	-0.674774	-1.02613	-0.670454	-1.00517	1.46286	0.136883	-1.03358	-0.803552	1.42104	0.697791
Z-score	Bacteroides salyersiae	-0.667385	1.38253	0.501228	-0.93777	-0.941276	-0.0780309	-0.669837	0.0618443	1.96668	-0.719439	-0.874062	-0.923201	-0.941276	2.15226	-0.254854	-0.941276	0.052627	0.82186	1.00937
Z-score	Clostridium sp. CAG:127	-0.595569	0.398846	0.668397	-0.220651	-0.758811	0.369085	-0.755418	-0.342978	-0.0616251	-0.173306	-0.291737	-0.21176	-0.67403	0.14743	0.269194	-0.794638	3.85884	-0.342961	-0.488308
Z-score	Bacteroides massiliensis	-0.641149	1.96157	0.219761	-0.817175	-0.936707	0.41553	-0.836051	0.0174356	1.37578	0.206129	-0.935647	-0.646193	-0.936707	1.58557	-0.360441	-0.936707	-0.453809	-0.358293	2.07711
Z-score	Prevotella copri 1	-1.42282	0.187681	-0.228069	1.08776	1.12585	-1.13055	2.24713	-0.281331	-0.303219	0.020938	-0.592915	0.753434	-0.506269	0.0204997	-1.26449	0.277224	1.82697	-1.12859	-0.689242
Z-score	Coprococcus eutactus 2	-0.171761	-0.327128	1.36196	-0.351563	-1.33088	2.14642	-0.918179	1.77021	-0.987126	-0.669466	-0.678934	-0.739497	0.88119	0.32623	1.28331	-0.778732	-0.548893	0.42602	-0.693183
Z-score	Bacteroides coprocola	-0.593595	1.6115	-0.181748	-0.672321	-0.672321	-0.346136	-0.281064	0.772492	2.17926	-0.256794	-0.672321	-0.66564	-0.672321	2.64726	-0.482896	-0.672321	-0.606948	-0.223648	-0.210435
Z-score	Hungatella hathewayi 1	0.45514	-0.0632251	-0.568789	0.258603	1.09307	-0.469888	-0.102173	2.48763	0.211197	-1.00102	-1.05421	0.76865	-1.06173	-0.940508	-0.209016	-1.06173	-1.06173	0.440625	1.87911
Z-score	Ruminococcus bromii 2	1.89146	-0.0930883	-0.39505	-0.961788	-0.864697	2.38693	-0.535969	0.400134	-0.654208	0.681646	-0.751844	-0.927836	-0.149923	-0.130064	1.44098	-0.823573	-1.04942	1.00374	-0.467421
Z-score	Bacteroides uniformis	-0.789744	1.00153	1.11257	-1.20441	0.0118738	0.112163	-0.61253	0.800878	1.16375	0.167248	-1.18666	-0.684068	-1.28849	0.145649	0.0642251	-1.30334	-0.978892	1.87605	1.5922
Z-score	Eubacterium sp. CAG:115	0.0765485	-0.308499	1.35487	-0.864813	-1.24687	0.516827	-1.19408	0.309808	-0.585399	-0.54165	-0.994383	0.966206	-1.0007	-0.180888	2.44286	-0.997626	1.4477	0.383903	0.416178
Z-score	Eubacterium sp. CAG:38	-0.777949	3.34042	0.402885	-0.61704	0.19749	0.0953562	-0.358791	1.00055	1.61781	-0.395491	-0.651411	-0.536637	-0.798208	-0.215804	-0.146281	-0.846442	-0.286699	-0.539788	-0.483977
Z-score	Eubacterium hallii	3.05069	-0.577741	-0.525257	-0.726959	-0.806358	1.00374	-0.810775	0.313908	-0.611817	0.248219	-0.560275	-0.799199	-0.538486	1.27556	1.23763	-0.680578	-0.370583	0.529181	-0.650899
Z-score	Blautia sp. CAG:257	4.05429	-0.234573	-0.312544	-0.435275	-0.411695	0.476646	-0.417212	0.0425166	0.568452	-0.374692	-0.435275	-0.425983	-0.435275	-0.342302	-0.357835	-0.435275	-0.429833	-0.0366343	-0.0574996
Z-score	Eubacterium siraeum	-0.14915	-0.602142	1.14216	-0.870863	-0.585805	0.12319	-0.685865	1.3052	0.640284	-0.335208	-1.30761	-0.724887	-1.2632	-0.636961	2.39796	0.0547345	-0.771726	1.5448	0.72508
Z-score	Bacteroides nordii	-0.963615	2.69502	0.598709	-0.98054	-1.11666	0.944329	0.477248	-0.0103541	0.279634	0.299298	-0.941746	0.253444	-0.939302	-0.400419	-0.407039	-1.11666	-0.918501	0.824181	1.42296
Z-score	Firmicutes bacterium CAG:65 / Clostridium sp. 2789STDY5608883	-1.26781	0.277706	0.912673	2.55952	0.840728	-0.103829	1.62439	-0.849445	0.0789981	-0.941525	0.671057	0.836536	-0.620811	-1.2524	-0.625199	-0.436884	-0.119193	-0.739269	-0.845243
Z-score	Roseburia sp. CAG:45 & sp. 2789STDY5608886	0.580199	-0.599918	1.19496	0.520431	-1.43079	2.46775	-0.911087	-0.0784488	-0.852869	-1.04308	0.326307	-0.654748	-0.329501	1.77745	0.176953	-1.14519	0.668887	-0.323868	-0.34344
Z-score	Ruminococcus gnavus	2.46157	0.46595	-0.38656	-0.641968	0.606092	-0.172359	-0.41944	-0.21312	2.94988	-0.53238	-0.667784	-0.352525	-0.675109	-0.634138	0.1741	-0.678041	-0.649864	-0.225653	-0.408647
Z-score	Barnesiella intestinihominis	-0.467754	-0.428455	1.83293	-0.848091	-1.07772	0.489808	-0.468729	0.234779	0.216093	-0.131369	-0.985751	-0.708261	-1.01778	1.18849	0.787508	-1.07772	-0.977144	2.0409	1.39826
Z-score	Firmicutes bacterium CAG:95	-0.733249	-0.485571	0.312398	-0.124991	-0.991339	0.125476	-0.0328274	-0.38087	-0.734994	-0.655839	0.58007	-0.395683	0.288195	-0.756428	1.12075	3.60083	0.288279	-0.411079	-0.61313
Z-score	Bacteroides congonensis	0.168621	2.4404	-0.488974	-0.582342	-0.596376	-0.542999	-0.593427	-0.582351	0.0759901	-0.539945	-0.581065	2.77005	-0.596376	-0.538216	-0.358854	-0.478863	-0.530223	0.393844	1.1611
Z-score	Odoribacter splanchnicus	-1.23273	0.124075	1.13115	-1.1061	1.33039	0.324764	-0.0717762	-0.169299	0.0586425	0.205535	-1.29191	-0.385713	-1.46597	1.41908	-0.432218	-1.47054	0.510112	0.475292	2.0472
Z-score	Bacteroides clarus	-0.0625991	1.07355	0.795142	-0.799413	-0.854179	2.9669	-0.648203	1.00024	0.133074	-0.459737	-0.808447	-0.84816	-0.854179	0.28379	-0.435167	-0.854179	-0.777341	1.29002	-0.141105
Z-score	Alistipes sp. CAG:435	-0.395246	-0.637287	-0.372279	0.664597	-0.7147	-0.659162	0.00515436	-0.564201	-0.670499	-0.714372	0.59587	0.482111	3.1201	-0.7147	-0.0978732	2.00505	-0.616553	-0.0989678	-0.617049
Z-score	Ruminococcus sp. CAG:17 & Blautia sp. 2789STDY5608880	2.62621	-0.670515	-0.361781	-0.586673	-0.761069	0.959477	-0.702647	1.97109	-0.687764	0.489035	-0.652505	-0.557647	-0.390111	-0.261842	1.38858	-0.761069	-0.761069	0.362259	-0.641965
Z-score	Clostridium sp. AT4	3.11884	0.72523	-0.147752	-0.587241	-0.432052	0.957897	-0.579307	-0.15002	2.07401	-0.580931	-0.587886	-0.542416	-0.587886	-0.367473	-0.562555	-0.587886	-0.559871	-0.326272	-0.276428
Z-score	Prevotella sp. 109 & CAG:255	-0.65162	0.0245449	0.60074	-0.666498	-0.666498	1.54976	-0.666498	2.82294	0.66627	1.75063	-0.666498	-0.665562	-0.666498	0.0505357	-0.640728	-0.666498	-0.666498	-0.505906	-0.33612
Z-score	Eubacterium rectale	0.518239	-0.973142	-0.535142	1.02831	-0.0406886	-0.110006	-1.10969	0.00310738	-0.702769	1.21625	0.313718	1.19333	-1.87843	-0.559746	1.02955	-0.838495	2.32874	-0.066056	-0.817082
Z-score	Bacteroides vulgatus	-0.642107	1.29475	0.412609	-1.04246	1.29575	0.0745443	-0.361114	0.219827	1.74365	0.0178602	-1.14121	-0.804665	-1.20655	0.49726	-0.446705	-1.21893	-0.873801	0.0253355	2.15594
Z-score	Akkermansia sp. CAG:344	-0.0898632	-0.0491375	-0.225787	-0.511255	-0.588494	-0.0825264	-0.405261	2.97917	-0.113327	-0.28742	-0.588226	-0.413982	-0.588494	-0.538594	-0.313081	-0.588494	-0.58212	2.67478	0.312113
Z-score	Roseburia hominis	0.499753	1.3873	1.00209	-0.953219	-1.49672	-0.0993687	-0.0600446	-0.476457	0.102583	-1.03283	0.117717	-0.303687	-1.37727	-0.249972	1.43663	-0.952777	0.405547	2.44849	-0.397774
Z-score	Roseburia inulinivorans	-1.28691	1.66515	-0.012616	0.269312	0.737972	-0.441068	0.701594	-0.183017	1.55087	0.393333	0.383435	-0.647482	-1.56207	0.871716	-0.282887	-1.3993	1.51309	-1.15749	-1.11363
Z-score	Roseburia sp. CAG:100	-0.63364	-0.278912	0.164995	0.0822711	3.25866	-0.285548	-0.528693	-0.658731	-0.544109	-0.287708	0.403031	-0.543002	-0.59251	-0.599543	-0.401352	0.0620793	2.23318	-0.504471	-0.345999
Z-score	Clostridium sp. CAG:91 & sp. 2789STDY5834873	-1.12347	0.417944	0.388553	-0.445931	0.759078	0.0759445	0.139558	-0.153899	0.18478	-0.098305	-0.349675	-0.988128	-1.35159	0.0949587	0.710513	-1.41802	3.32078	-0.244984	0.0818943
Z-score	Blautia wexlerae	3.79297	-0.447087	-0.480014	-0.626821	1.15762	0.397123	-0.622977	0.175105	-0.214905	0.0749688	-0.567963	-0.652603	-0.47789	-0.165655	0.263804	-0.58547	-0.356455	-0.161852	-0.5019
Z-score	Prevotella sp. CAG:732	-0.595197	-0.376151	-0.425051	3.67623	-0.599984	-0.567122	0.452303	-0.194102	-0.31548	-0.599984	0.955563	-0.539281	0.219972	-0.599984	-0.599984	0.640134	0.617741	-0.59797	-0.551657
Z-score	Clostridium sp. CAG:7	-0.648328	1.5718	0.369115	-0.698827	1.18301	1.72218	-0.910673	0.669745	2.18158	-0.00850317	-1.02337	-0.557576	-1.02003	0.469378	-0.37135	-1.06306	-0.646731	-0.478029	-0.740331
Z-score	Prevotellamassilia timonensis	-0.682623	-0.477467	-0.673759	2.77059	-0.682623	-0.657297	0.553415	-0.682358	-0.282319	-0.682623	0.00251689	1.42647	0.00650697	-0.682623	-0.66848	0.655893	1.961	-0.679277	-0.524934
Z-score	Providencia rettgeri 2	-0.339423	-0.339423	-0.339423	3.32889	-0.339423	-0.339423	-0.339423	-0.339423	-0.339423	-0.339423	-0.339423	2.4413	-0.339423	-0.339423	-0.339423	-0.339423	-0.339423	-0.339423	-0.339423
Z-score	Parabacteroides johnsonii	-0.592503	0.0127155	-0.034088	-0.72498	-0.74749	-0.0695541	-0.577687	1.17738	1.94851	-0.413388	-0.74749	-0.74749	-0.736875	2.95268	-0.014584	-0.74749	-0.61548	-0.0640014	0.741822
Z-score	Prevotella sp. CAG:386	-0.877379	-0.591703	-0.0322929	2.2354	-0.897923	-0.866586	0.721645	-0.560469	-0.338046	-0.837647	0.508881	1.26425	0.522047	-0.747367	-0.897923	0.978986	1.99336	-0.746431	-0.830811
Z-score	Clostridium symbiosum	0.388989	0.0455647	-0.308488	-0.520055	4.05591	-0.321761	-0.191592	-0.251335	0.618643	-0.264463	-0.537385	-0.091885	-0.477398	-0.25501	-0.401042	-0.537385	-0.454609	-0.296729	-0.199975
Z-score	Lactobacillus rogosae	-1.2137	2.03388	0.929792	-0.270241	-1.30357	0.274363	0.390328	0.652314	1.35428	0.299923	-0.224893	-0.655774	-1.20058	1.08797	-0.785079	-1.30899	1.33141	-0.687614	-0.703808
Z-score	Alistipes finegoldii	-0.60346	-0.351996	0.458103	-0.800054	-0.0733451	-0.323705	-0.300245	0.35778	-0.37491	-0.107337	-0.824354	1.43191	-0.953011	-0.820057	0.367775	-0.953011	-0.753944	1.77856	2.8453
Z-score	Alistipes putredinis	-0.716127	0.980908	0.233927	-1.15101	-0.598297	-0.280896	-0.192516	1.22266	-0.0726429	0.356353	-1.26092	0.95315	-1.27067	-0.453895	0.239179	-1.26549	-0.470165	1.22995	2.51651
Z-score	Prevotella sp. CAG:604	-0.841779	-0.594815	-0.720263	2.2434	-0.841779	-0.273136	1.17652	-0.841446	-0.827871	-0.495795	0.657462	1.34494	1.05602	-0.841779	-0.841779	1.52884	0.599036	-0.797335	-0.68844
Z-score	Sutterella wadsworthensis 1	-0.889925	-0.402718	0.208282	-0.623501	3.125	-0.570705	-0.220603	0.182535	1.24732	1.29855	-0.699789	0.822977	-0.908962	-0.485687	-0.741433	-0.913101	-0.36677	-0.504743	0.443268
Z-score	Clostridium sp. CAG:62	0.147871	-0.00682692	1.17251	-1.04896	-0.716253	0.753176	-0.655622	-0.0962	-0.800759	-0.342644	-0.778155	-0.936495	-0.952591	1.67777	2.67711	-0.576129	-0.730822	0.961072	0.25195
Z-score	Bacteroides sp. CAG:443	-0.329221	-0.461127	3.60606	-0.487588	-0.487588	1.52366	-0.487588	-0.487588	-0.296597	-0.418234	-0.487588	-0.487588	-0.487588	-0.29869	-0.2149	-0.487588	-0.487588	0.638718	0.638624
Z-score	Paraprevotella xylaniphila	-0.697569	0.0607071	3.04245	-0.442903	-0.697569	0.0244422	-0.422864	0.169761	1.88875	-0.697569	-0.6914	-0.650932	-0.697569	1.03835	-0.626099	-0.697569	-0.697569	0.680778	0.114384
Z-score	Parabacteroides gordonii	-0.621249	1.94848	-0.436585	-0.18149	-0.621249	2.168	0.691455	-0.605961	2.4032	-0.621249	-0.602795	-0.621249	-0.621249	-0.564988	-0.449125	-0.621249	-0.543469	0.232112	-0.331338
Z-score	Morganella morganii	-0.524211	-0.23792	1.20111	2.4465	-0.524211	-0.524211	-0.124736	-0.239196	-0.0903856	-0.524211	-0.32235	-0.405347	-0.524211	-0.524211	-0.524211	-0.524211	-0.524211	2.9173	-0.427074
Z-score	Bacteroides sp. CAG:875 & sp. 2789STDY5834845	-0.480128	0.182595	0.950278	-0.480128	-0.480128	2.54952	-0.480128	-0.269808	-0.480128	-0.480128	-0.480128	-0.480128	-0.480128	-0.480128	2.91778	-0.480128	-0.480128	-0.127504	-0.441331
Z-score	Clostridium innocuum	0.455678	-0.230751	-0.332742	-0.363943	4.16616	-0.199819	-0.337762	-0.0609317	-0.210568	-0.306516	-0.381754	-0.0768176	-0.379423	-0.338671	-0.137601	-0.381754	-0.366393	-0.242001	-0.274388
Z-score	Emergencia timonensis	1.8974	2.20487	-0.0524045	-0.750929	-0.750929	-0.535747	-0.750929	1.76172	-0.00555114	-0.644807	-0.750929	-0.730785	-0.750929	0.0192968	-0.415307	-0.750929	-0.750929	0.364092	1.39373
Z-score	Ruminococcus sp. CAG:177	-0.691297	-0.40526	0.475988	-0.165465	-1.04687	-0.0704582	-0.028432	0.0315898	-0.625057	-0.594167	-0.856228	1.83305	3.03985	-0.332458	0.370461	-0.958626	-0.595195	1.08752	-0.468946
Z-score	Firmicutes bacterium CAG:240	0.532133	-0.657498	1.59448	-0.68924	-0.773825	-0.150753	-0.732922	0.1419	-0.735809	-0.623688	-0.72401	-0.764497	0.00224532	-0.534229	2.60337	1.35093	-0.72604	1.5021	-0.614657
Z-score	Anaerostipes hadrus 1	3.67728	-0.313984	-0.442579	-0.715947	0.743744	0.704852	-0.726885	0.0314867	-0.175881	-0.0400959	-0.703106	-0.727225	-0.654002	0.602398	0.276153	-0.603286	-0.646309	0.272536	-0.559154
Z-score	Enterobacter xiangfangensis	-0.657803	1.17839	-0.492339	0.845185	-0.699997	-0.491064	2.23148	-0.688314	-0.38695	2.74607	0.343452	-0.243925	-0.635094	-0.686915	-0.584315	-0.131547	-0.426714	-0.679408	-0.540197
Z-score	Clostridium scindens 2	0.812544	0.560785	-0.576803	-0.847786	2.80232	2.05763	-0.794105	-0.299229	0.508395	-0.039187	-0.852827	-0.754213	-0.852827	-0.188924	0.287927	-0.852827	-0.852827	0.330342	-0.448391
Z-score	Bilophila wadsworthia	-0.954231	1.84924	0.155129	-0.797811	-0.600023	-0.142118	-0.145505	2.22726	0.927342	0.92785	-0.689364	1.49352	-1.15593	-0.6487	-0.203043	-1.44459	-0.380833	0.0177409	-0.435927
Z-score	Coprococcus sp. HPP0074 & HPP0048 / Lachnospiraceae bacterium 9_1_43BFAA & 6_1_37FAA	0.585076	0.325358	-0.402611	-0.493998	-0.494803	-0.209945	-0.478808	0.123822	3.99313	-0.494803	-0.492495	-0.444473	-0.494803	0.0359635	0.376366	-0.494803	-0.494803	-0.164764	-0.278605
Z-score	Blautia hydrogenotrophica	1.96127	-0.499267	-0.593032	-0.770483	-0.770483	1.44489	-0.770483	2.62914	0.423946	-0.455657	-0.770483	-0.770483	-0.770483	0.279757	0.210118	-0.770483	-0.770483	0.417387	0.345314
Z-score	Blautia producta 2	1.71872	-0.0595527	-0.609017	-0.80238	-0.80238	0.89944	-0.616977	0.428593	2.52357	1.57966	-0.80238	-0.762208	-0.80238	-0.80238	0.559148	-0.80238	-0.80238	0.10643	-0.151146
Z-score	Bacteroides coprophilus	-0.867497	2.06359	1.26425	-0.780919	-0.871742	0.419045	-0.132193	1.21671	1.51114	-0.87102	-0.794047	-0.765321	-0.871742	1.66558	-0.0287367	-0.86975	-0.833389	-0.233456	-0.220502
Z-score	Lachnoclostridium phytofermentans 2	-0.285568	0.72002	4.13464	-0.285568	-0.285568	-0.285568	-0.285568	-0.285568	-0.285568	-0.285568	-0.285568	-0.285568	-0.285568	-0.285568	-0.285568	-0.285568	-0.285568	-0.285568	-0.285568
Z-score	Prevotella sp. CAG:520	-0.625651	-0.399036	-0.502642	0.645013	-0.626369	-0.512004	-0.122311	-0.626369	0.0238904	0.14257	-0.0592792	2.40972	0.261404	-0.626369	-0.626369	3.00063	-0.553324	-0.617557	-0.585949
Z-score	Firmicutes bacterium CAG:24 / Clostridium sp. 2789STDY5834869 & 2789STDY5834922	1.81497	-0.481151	2.13997	-1.25176	-0.975484	0.651473	-0.443732	1.48358	-0.545521	-0.436852	-0.360131	-0.90227	-1.19115	-0.317729	0.663187	0.46355	-1.23357	0.4538	0.468821
Z-score	Ruminococcus torques	0.324792	0.205422	-0.541753	-1.07245	2.44873	1.63024	-1.09968	0.27852	0.763222	-0.173747	-1.2018	-0.522314	-1.20729	0.513698	0.299157	-1.20516	-0.886499	0.868314	0.578612
Z-score	Ruminococcus sp. CAG:353 & sp. 2789STDY5834938	-1.18657	-0.418864	0.568187	1.31751	1.28469	0.0553537	-0.038258	0.0417318	-1.23523	-1.56407	-0.335813	-0.457915	-0.856014	-1.45841	2.09842	0.980826	1.00011	0.385406	-0.181104
Z-score	Butyricimonas virosa	-0.889059	2.08065	1.09384	-0.595629	-1.3107	1.57209	-0.926812	0.197647	-0.0101819	-0.654452	-1.23231	0.615361	-1.3107	0.067971	0.428352	-0.646473	-0.297123	0.255997	1.56153
Z-score	Clostridium sp. CAG:58	0.448899	-0.317606	-0.1182	-1.29366	1.84931	0.202223	-1.32811	1.01667	1.33996	-0.190797	-1.32811	0.638966	-1.32811	1.19499	0.630398	-1.32811	-0.96734	0.63019	0.248419
Z-score	Candidatus Gastranaerophilales bacterium x14	-0.458189	-0.36896	3.84689	-0.57729	0.589091	0.0716347	-0.555101	-0.533411	-0.417607	0.484028	-0.578486	-0.578204	-0.578486	0.655847	-0.148504	-0.578486	-0.576178	0.131507	0.169902
Z-score	Phascolarctobacterium sp. CAG:207	-0.682028	2.36128	0.207547	-0.814487	2.72159	-0.0638291	-0.568919	-0.10777	0.601124	-0.735064	-0.31289	-0.935725	-1.02599	-0.392412	0.0502214	-1.02903	-0.0502415	0.216489	0.560137
Z-score	Coprobacillus cateniformis	0.13104	0.560969	-0.473322	-0.444644	-0.657738	0.336328	-0.869624	0.0576171	-0.697737	0.0351535	-0.824613	-0.488603	-0.879295	0.25876	3.6322	-0.859239	0.515556	0.704154	-0.0369678
Z-score	Coprococcus sp. 2789STDY5608819 / Clostridium sp. CAG:264	-0.300562	-0.063567	-0.170082	-0.254958	-0.852081	1.16956	-0.50716	0.452135	-0.36957	-0.609773	-0.191416	-0.741675	-0.749533	-0.000157202	1.80995	-0.827919	3.18029	-0.328995	-0.644486
Z-score	Megamonas funiformis == rupellensis	-0.474363	2.77449	-0.444668	-0.302208	-0.604284	-0.0457666	0.849194	-0.37526	2.63857	0.0533184	-0.599552	-0.601446	-0.604284	-0.600815	-0.604284	-0.604284	0.319412	-0.473382	-0.300392
Z-score	Clostridium clostridioforme 2	1.66673	-0.471411	2.87159	-0.481548	-0.481548	-0.481548	-0.481548	-0.481548	2.18488	-0.481548	-0.481548	0.00563923	-0.481548	-0.481548	-0.481548	-0.481548	-0.481548	-0.0361157	-0.442749
Z-score	Prevotella sp. P4-51 & PA-67 & P5-64 & P5-108 & CAG:474	-0.534346	-0.491828	-0.261477	0.222501	-0.538164	-0.506372	0.0381909	-0.532841	-0.360069	-0.324038	-0.203401	2.62848	0.0421099	-0.538164	-0.533995	3.03993	-0.149241	-0.522	-0.475275
Z-score	Bifidobacterium pseudocatenulatum	0.641485	1.13654	-0.910714	-0.437634	-0.506226	1.70387	-0.920566	-0.167607	1.52909	2.04535	-0.364824	1.22078	-0.0978214	-0.839433	-0.797354	-1.0395	-0.862091	-0.537756	-0.795591
Z-score	Coprobacter fastidiosus	-0.656515	0.649657	0.424991	-0.698533	3.7609	0.153212	-0.699214	-0.349041	0.372338	-0.16649	-0.716352	-0.510326	-0.716352	0.403648	-0.105429	-0.716352	-0.716352	0.194729	0.0914748
Z-score	Klebsiella oxytoca	-0.195895	-0.0797457	3.44409	-0.378001	-0.389667	-0.367588	-0.366386	-0.372758	2.26156	-0.389667	-0.333588	-0.348972	-0.378148	-0.389667	-0.363817	-0.389667	-0.300842	-0.29376	-0.367485
Z-score	Blautia massiliensis	3.36673	-0.594861	-0.557757	-0.746368	-0.812087	0.565064	-0.783625	1.10646	-0.252306	1.05905	-0.528992	-0.721456	-0.642359	0.133129	0.496296	-0.667201	-0.224796	0.376413	-0.571328
Z-score	Blautia sp. CAG:52 & sp. 2789STDY5834917	3.29018	-0.743917	-0.415101	-0.660432	-0.943127	0.706606	-0.93566	0.393446	-0.325947	0.788034	-0.750778	-0.436048	-0.303994	-0.304062	1.46961	-0.538774	-0.135496	0.395782	-0.550319
Z-score	Parabacteroides sp. CAG:409	0.299073	-0.0136085	1.78869	-0.615328	-0.708613	-0.183717	0.161223	0.950029	3.24104	0.00104282	-0.708613	-0.708613	-0.708613	-0.708613	-0.589105	-0.708613	-0.708613	-0.0225661	-0.0564834
Z-score	Clostridium sp. CAG:138	-0.366655	-0.55089	-0.203455	-0.379308	-0.924118	0.158143	-0.676935	0.0245575	-0.341491	-0.829607	-0.448128	-0.289592	-0.0163138	1.55478	1.32575	3.32593	-0.634816	-0.214696	-0.513152
Z-score	Parasutterella excrementihominis	-0.908964	0.850901	0.518619	-0.899931	2.89144	0.340086	-0.0248869	0.122628	0.5152	1.19348	-1.01757	-0.746971	-1.07132	-0.231015	-0.0118459	-1.07132	-0.981401	-0.489151	1.02202
Z-score	Streptococcus sanguinis	3.32862	-0.182589	-0.682393	-0.362593	-0.897515	1.11157	-0.728887	0.371625	0.960997	-0.0649259	1.00956	-0.449779	-0.4813	-0.839569	-0.513278	-0.830835	0.227448	-0.564413	-0.411742
Z-score	Veillonella dispar	-0.77732	0.130469	0.970298	-0.457	-0.82355	-0.783927	0.0895116	-0.444171	3.32234	-0.470812	0.325358	-0.393028	-0.236229	1.63972	-0.554914	-0.835332	-0.650985	-0.157757	0.107322
Z-score	Clostridium methylpentosum	2.46977	-0.293087	-0.0829515	-0.665878	-0.665878	0.171693	-0.665878	0.439781	-0.0459313	-0.665878	-0.665878	-0.599963	-0.665878	-0.665878	2.42493	-0.665878	-0.665878	1.53331	-0.0246559
Z-score	Butyricimonas synergistica 2	-0.855872	0.290993	0.557083	-1.05589	-1.09787	0.497105	-0.447904	0.547535	0.809215	-0.400664	-1.09595	-0.758306	-1.09787	2.13032	0.753434	-1.09787	-0.445497	0.806385	1.96161
Z-score	Ruminococcus faecis	0.601693	-0.389753	-0.923863	-0.355335	-1.00141	0.99977	-1.29332	0.137427	-0.325361	0.247365	0.561839	-0.299702	1.47897	-0.480554	-0.254159	-0.698679	3.08814	-0.286984	-0.806088
Z-score	Erysipelatoclostridium ramosum	1.54246	-0.135862	-0.457702	-0.64438	2.76821	0.0865984	1.90393	-0.495826	1.06041	-0.49171	-0.539436	-0.63242	-0.64426	-0.643734	-0.609798	-0.686083	-0.678109	-0.332555	-0.369737
Z-score	Fusicatenibacter saccharivorans	2.36245	-0.621768	-0.163075	-1.13227	-0.417136	0.27712	-1.32066	1.07762	0.0427166	1.40541	-1.23671	0.391836	-0.201414	-0.289142	1.5637	-0.966676	-0.713848	0.638892	-0.697043
Z-score	Klebsiella aerogenes	-0.728925	1.0651	2.30031	-0.59541	-0.728925	-0.683292	0.886356	-0.603481	2.15798	-0.728925	0.154434	-0.726851	-0.728925	-0.728925	-0.728925	-0.651377	0.323837	-0.463245	1.20919
Z-score	Eubacterium sp. CAG:252	-0.573184	1.17621	-0.269196	1.06288	-0.211011	-0.0147383	0.0297918	-0.631515	0.381679	3.5833	-0.138295	-0.713456	-0.578757	-0.29549	-0.526592	-0.716436	-0.26646	-0.636651	-0.662074
Z-score	Faecalitalea sp. UBA637	2.77998	-0.914176	-0.467848	0.182894	-1.28921	0.444976	-0.735465	-0.296136	-0.363472	1.50215	1.07598	-0.200092	1.02116	-1.28921	0.0801577	-0.638443	-0.425569	0.357472	-0.825156
Z-score	Eubacterium sp. CAG:248	-0.892667	2.58083	0.163833	0.116937	-0.964206	1.07925	0.574542	-0.436641	1.04394	-0.315015	-0.0147782	-0.554294	-0.890333	-0.895278	-0.650965	-0.836602	1.97603	-0.841871	-0.242714
Z-score	Firmicutes bacterium CAG:227	2.74638	0.337035	-0.704992	-0.6857	-1.00817	1.46592	-1.0073	-0.806104	-0.0191097	0.0324635	-0.307772	-0.88357	-0.322535	0.0782175	-0.359198	0.480003	1.91075	-0.24769	-0.698631
Z-score	Ruminococcus sp. 2789STDY5608794 & sp. 2789STDY5834890 / Firmicutes bacterium CAG:56	-0.0967926	-0.374745	-0.293357	-0.96566	-0.185871	0.627951	-1.29872	0.506267	-0.936184	1.76892	-0.578859	-0.799301	-0.904904	0.636468	1.46014	-0.806683	2.4567	0.347878	-0.563249
Z-score	Bifidobacterium longum	2.86029	-0.453012	-0.65198	-0.756527	-0.828685	1.2306	-0.391304	0.449131	0.432402	1.22564	-0.635188	1.42322	-0.704595	-0.762945	-0.333894	-0.845589	-0.795952	0.154478	-0.616084
Z-score	Plesiomonas shigelloides	-0.248248	-0.158741	-0.248248	4.23991	-0.248248	-0.248248	-0.248248	-0.248248	-0.248248	-0.248248	-0.109205	-0.248248	-0.248248	-0.248248	-0.248248	-0.248248	-0.248248	-0.248248	-0.248248
Z-score	Firmicutes bacterium CAG:194	-0.597188	-0.789966	1.04032	1.02593	-0.990147	-0.806042	-0.537768	-0.383264	-0.972074	-0.493333	0.0119633	0.984242	-0.401479	-0.767936	0.354795	0.318293	3.2632	-0.108976	-0.150578
Z-score	Roseburia sp. CAG:197	-0.00866147	-0.70924	1.41965	-0.457763	-0.709485	-0.0898718	0.280035	-0.672838	-0.709485	-0.457896	1.92221	-0.645734	-0.26831	-0.615262	3.02097	-0.412916	-0.641125	0.206718	-0.450995
Z-score	Azospirillum sp. CAG:239	-0.610973	-0.683858	3.11883	-0.705592	-0.710671	0.722898	-0.710671	1.12221	1.20974	0.153056	-0.710671	-0.710671	-0.710671	0.962718	-0.231855	-0.710671	-0.710671	-0.311317	0.228837
Z-score	Blautia hansenii	3.22135	1.75285	-0.52342	-0.556117	-0.556117	-0.462059	-0.556117	-0.170609	1.12907	-0.556117	-0.554403	-0.552632	-0.556117	0.800996	-0.556117	-0.556117	-0.556117	-0.173939	-0.018265
Z-score	Ruthenibacterium lactatiformans	1.06135	0.444491	-0.450088	-1.00965	-0.240511	0.164804	-0.288734	2.05389	0.111855	-0.314609	-1.10925	-0.255928	-1.11576	-0.360166	-0.0901688	-1.1387	-1.01999	2.33231	1.22485
Z-score	Christensenellaceae bacterium Phil1 & Clostridium sp. CAG:226	0.0618705	-0.708623	-0.133622	-0.38409	-1.0663	0.34613	-0.196603	-0.639976	-0.932918	-0.95496	0.37287	0.500634	0.824245	0.211555	0.220925	3.3075	-1.0496	1.00857	-0.787606
Z-score	Klebsiella quasipneumoniae	-0.506409	-0.040929	-0.519428	1.53687	-0.540024	-0.540024	1.75471	-0.540024	0.864473	-0.53468	-0.350422	-0.527609	3.0222	-0.540024	-0.434621	-0.540024	-0.503058	-0.537244	-0.523739
Z-score	Lachnospiraceae bacterium TF01-11 / Clostridium sp. CAG:122	-0.825952	2.04123	1.25691	-0.845171	-1.04027	0.969268	-0.801923	1.42045	-0.692118	1.21141	-0.677568	-0.803777	-0.973623	0.706219	1.12379	-0.982309	-0.329265	-0.541807	-0.215493
Z-score	Prevotella sp. P4-65 & P4-76 & P5-60 & P5-119 & P5-125 & CAG:592	-0.664641	-0.497605	-0.361826	0.880171	-0.674959	-0.497481	-0.674959	-0.674959	1.17805	-0.590603	-0.550453	1.62025	1.50188	-0.674959	-0.674959	2.68853	-0.151896	-0.668084	-0.511497
Z-score	Ruminococcus sp. A254.MGS-254 & CAG:254	-0.537978	-0.509089	-0.734114	-0.694945	-1.49708	1.79755	-1.19133	1.21129	0.00806528	1.63669	-0.198079	0.249255	0.41879	0.0693474	1.82919	-1.00203	0.691626	-0.567356	-0.979797
Z-score	Coprococcus eutactus 1	-0.548358	-0.38546	0.596204	-0.392866	3.50498	-0.762544	-0.632378	1.11104	-0.763634	-0.764134	0.457123	-0.0451514	-0.548085	-0.764422	0.597084	-0.754961	0.39144	0.129541	-0.425418
Z-score	Blautia producta	1.5222	1.81146	-0.306272	-0.723062	2.01404	0.945438	-0.628773	0.275057	1.68891	-0.70521	-0.723062	-0.723062	-0.723062	-0.723062	-0.655559	-0.723062	-0.723062	-0.304299	-0.595557
Z-score	Firmicutes bacterium CAG:424	-0.569533	1.35954	1.12176	-0.643372	-0.643372	-0.584204	-0.643372	-0.643372	-0.231247	-0.643372	-0.643372	-0.0733874	-0.643372	-0.578383	0.90033	-0.643372	-0.643372	1.76601	2.67946
Z-score	Acetobacter sp. 46_36 & CAG:267	-0.244528	-0.536182	3.02698	-0.612811	-0.613812	0.00842689	-0.613812	-0.169673	-0.287116	-0.133016	-0.613812	-0.568208	-0.613812	1.82657	-0.306527	-0.613812	-0.613812	-0.0443669	1.72332
Z-score	Culturomica massiliensis	-0.563925	1.78115	1.99699	-0.563925	-0.563925	-0.553018	-0.556515	-0.563925	-0.559695	-0.563925	-0.563925	2.12512	-0.563925	-0.563925	-0.563925	-0.563925	-0.563925	1.67657	0.292581
Z-score	Clostridium sp. CAG:299	-0.602447	2.88466	0.487756	-0.671743	1.89919	-0.411645	-0.669802	-0.0461027	1.61666	-0.608127	-0.672164	-0.627356	-0.672164	-0.481343	-0.646531	-0.672164	0.0569194	-0.101631	-0.0619709
Z-score	Bacteroides sp. Marseille-P3166 & CAG:598	-0.425214	-0.233202	0.69333	-0.470521	-0.470521	0.105803	-0.470521	1.76313	-0.462317	3.57147	-0.470521	-0.470521	-0.470521	-0.470521	-0.263989	-0.470521	-0.470521	-0.238106	-0.27621
Z-score	bacterium LF-3 / Coprobacillus sp. CAG:235	2.26752	0.324811	-0.28864	-0.625993	-0.963253	1.76298	-1.06532	-0.290418	-0.509788	0.454936	-0.755585	-1.06868	-0.355615	0.750609	1.25468	-0.948083	-0.558511	1.35097	-0.736614
Z-score	Blautia sp. CAG:237	0.273624	0.0787333	-0.791006	-0.630888	-0.926662	1.42171	-0.674801	1.12625	-0.205935	0.439117	-0.0179947	-0.879776	-0.473122	0.305344	-0.381893	-0.844551	3.22505	-0.238252	-0.804957
Z-score	Bacteroides sp. CAG:530	-0.584785	-0.591404	0.361739	0.0524835	-0.633774	-0.46194	-0.523507	-0.633774	-0.628888	-0.633774	0.194859	2.49508	-0.037871	-0.633774	-0.633774	2.32359	1.71861	-0.627633	-0.521461
Z-score	Clostridium scindens 1	1.65019	-0.606283	-0.613418	-0.816179	-0.816179	0.333632	0.322394	1.7975	2.09488	-0.318072	-0.816179	0.401063	-0.816179	-0.816179	-0.672663	-0.816179	-0.816179	1.51177	-0.18774
Z-score	Clostridium sp. 42_12 & CAG:75	0.200579	0.402435	0.567414	-1.09291	-1.11632	0.978344	-1.13953	0.557699	-0.827713	0.0740741	-0.288098	-0.588604	-1.19149	2.75982	0.722297	-0.945879	1.34383	-0.166649	-0.249301
Z-score	Desulfovibrio piger	-1.10229	0.382802	0.0999955	-0.0311456	-1.35992	-0.476518	-0.893393	0.0740757	-0.769278	-0.273681	0.968098	2.6981	1.33668	-1.18223	-0.13912	-0.241033	1.16875	0.645339	-0.905227
Z-score	Alistipes shahii	-0.575911	0.570171	0.119845	-0.752615	-1.02065	-0.21435	-0.367616	0.671906	-0.137516	0.122538	-0.920384	2.19338	-0.979269	-0.668701	-0.0586427	-1.01908	-0.682631	1.32838	2.39114
Z-score	Megasphaera sp. BL7 & NM10	-0.377319	0.0132041	-0.364449	0.554646	-0.377319	-0.350075	4.05688	-0.371724	-0.135611	-0.377319	-0.275342	0.597909	-0.375128	-0.377319	-0.349152	-0.377319	-0.377319	-0.3711	-0.366149
Z-score	Coprobacter secundus == Gabonia massiliensis	-0.792008	-0.162011	1.51154	-0.979793	-1.07494	0.172297	-0.192061	-0.134005	1.75318	1.89797	-1.04524	-0.901089	-1.02734	1.44456	-0.436422	-1.07494	-0.19011	0.610848	0.619563
Z-score	Bacteroidales bacterium H8 & H9 & Prevotella sp. CAG:279	-0.664163	-0.266862	-0.0577286	0.565314	-0.937407	-0.585761	1.25709	-0.894619	-0.409747	-0.168064	-0.294266	3.4403	-0.516835	0.348436	-0.726198	0.630448	0.474888	-0.906648	-0.288172
Z-score	Anaerostipes caccae	1.76967	0.593994	-0.420725	-0.642769	-0.0346003	0.600813	-0.575964	0.467359	3.33368	-0.538144	-0.642769	-0.583422	-0.642769	-0.460738	-0.584632	-0.642769	-0.642769	-0.191533	-0.161908
Z-score	Akkermansia sp. KLE1605	-0.34696	-0.517186	-0.303343	-0.519696	-0.519696	-0.491139	-0.519696	-0.519696	-0.096916	1.05086	-0.519696	-0.519696	-0.519696	-0.519696	1.26819	-0.519696	-0.519696	1.28677	3.34668
Z-score	Acinetobacter sp. N54.MGS-139 / Proteobacteria bacterium CAG:139	-0.632355	1.38385	0.0360098	-0.886503	-0.886503	-0.187553	-0.754457	0.862455	0.167928	1.03513	-0.886503	-0.134069	-0.886503	2.11301	-0.618888	-0.886503	-0.886503	-0.106883	2.15484
Z-score	Negativibacillus massiliensis	-0.263832	0.83865	-0.237616	-0.56703	-0.719031	0.0982989	-0.697596	1.33133	3.51939	-0.30162	-0.719031	-0.719031	-0.719031	0.483665	-0.167294	-0.719031	-0.475091	0.139481	-0.10558
Z-score	Clostridia bacterium UC5.1-1D10 / Clostridium sp. CAG:505 / Firmicutes bacterium CAG:466	1.11259	-0.178079	1.66417	-0.757133	-0.757133	-0.530207	-0.757133	1.8914	0.992264	-0.5795	-0.757133	-0.426939	-0.757133	0.119088	-0.722224	-0.757133	-0.757133	-0.273433	2.2308
Z-score	Firmicutes bacterium CAG:124	0.399425	-0.25122	-0.268189	-0.390408	-1.51502	-0.494197	-0.0905807	0.810142	-0.796444	-1.16287	-0.69513	1.91928	2.35245	0.358191	1.43401	-0.416917	-1.02513	0.261323	-0.428719
Z-score	Butyrivibrio crossotus	-0.799669	-1.1145	2.29446	1.11938	-1.18416	1.43544	-0.363123	-1.13859	-1.18144	0.246261	0.0778307	0.0222632	0.816396	0.569028	1.35876	-0.27487	-0.93668	-0.541333	-0.405454
Z-score	Roseburia sp. CAG:380	-0.850928	2.02575	1.7369	0.0959251	-1.32048	-0.0837543	-3.34132e-05	-0.780191	1.40109	0.387956	0.387889	-0.74451	-1.20506	-0.97741	1.21213	-0.374867	-1.32048	0.453518	-0.043446
Z-score	Ruminococcus sp. Marseille-P328 / Blautia sp. 2789STDY5608844 & sp. 2789STDY5608844	1.7593	-0.688779	-0.536369	-0.976593	1.84108	0.398036	-1.01145	1.00919	-0.456092	0.363466	-0.630194	-0.813469	-0.97446	-0.197288	2.19474	-0.757195	-0.209373	0.446251	-0.760797
Z-score	Enterobacter cloacae complex 'Hoffmann cluster IV'	-0.437248	-0.0726524	-0.133574	1.28328	-0.439391	-0.435283	0.492676	-0.435598	-0.331238	-0.433465	3.85041	-0.427787	-0.327931	-0.439391	-0.439391	-0.432704	-0.0209056	-0.399138	-0.420666
Z-score	Mediterranea massiliensis	-0.381227	-0.381227	2.24435	-0.378099	-0.381227	0.333883	-0.381227	-0.269034	-0.381227	-0.381227	-0.381227	-0.381227	-0.381227	-0.381227	-0.381227	-0.381227	-0.381227	3.40608	-0.381227
Z-score	Dialister invisus	1.17977	-0.648724	2.05222	-1.17439	-0.332816	0.0519941	-0.825977	-0.128016	-0.157332	1.56816	-0.288048	-1.06762	-1.18965	0.575025	1.10183	-1.18965	-1.0469	1.23499	0.285131
Z-score	Flavonifractor plautii	-0.571353	0.786715	-0.0551494	-0.794752	2.19579	-0.505042	-0.256661	2.34488	1.47743	-0.241474	-0.859692	0.765577	-0.851181	-0.737704	-0.687323	-0.860454	-0.736155	-0.434592	0.0211351
Z-score	Alistipes sp. CAG:268	-0.498495	-0.439519	0.0872002	-0.505723	-0.505723	-0.0581492	-0.505723	3.70213	0.0277343	-0.503454	-0.505723	-0.505047	-0.505723	-0.119944	0.71208	-0.505723	-0.505723	1.39717	-0.261648
Z-score	Dialister sp. CAG:357	-0.0313159	2.08557	-0.140813	-0.566134	-0.598855	-0.592947	3.38209	0.217447	-0.350321	-0.35368	-0.598855	-0.316264	-0.598855	0.304597	-0.324844	-0.598855	-0.598855	0.0422945	-0.361402
Z-score	Odoribacter laneus	-0.0926359	-0.572935	-0.461163	0.257116	-0.572935	-0.572935	-0.572935	-0.348649	2.33905	-0.520567	-0.572935	-0.572935	-0.572935	-0.572935	1.34464	-0.572935	-0.572935	0.465329	2.74624
Z-score	Bacteroides sp. Marseille-P3108 & CAG:633	-0.340596	-0.321791	3.44168	-0.417196	-0.417196	-0.350145	-0.417196	-0.285275	1.95363	-0.417196	-0.417196	-0.417196	-0.417196	-0.417196	-0.417196	-0.417196	-0.417196	0.908845	-0.417196
Z-score	Azospirillum sp. 51_20	-0.452816	0.184121	1.67416	-0.806098	-0.744343	-0.587843	-0.794651	0.878531	0.684671	1.20323	-0.806098	-0.726582	-0.806098	2.69568	-0.658708	-0.806098	-0.806098	0.208082	0.466959
Z-score	Acidaminococcus intestini	-0.535187	-0.355363	-0.119459	-0.568571	-0.659225	-0.347409	-0.483888	2.71149	2.06659	0.144651	-0.659225	-0.629821	-0.659225	1.81673	-0.604221	-0.655748	-0.659225	0.0764532	0.120645
Z-score	Clostridium sp. CAG:354_28_25	0.139211	-0.668519	0.931919	-0.667804	-0.668519	-0.571721	-0.668519	0.684626	-0.190045	-0.0711044	-0.668519	-0.668519	-0.668519	3.4105	1.18394	-0.654694	-0.668519	0.489048	-0.00423467
Z-score	Clostridium sp. L2-50	-0.23475	-0.519953	0.370561	-0.154634	-1.10497	1.70678	-0.896778	0.815209	-0.968914	-0.100449	1.64851	-0.915786	-0.667636	1.74605	1.57	-1.05208	-1.10497	0.16526	-0.301455
Z-score	Prevotella copri 2	-0.800904	-0.418102	-0.645472	1.68104	-0.811762	-0.649745	1.74582	-0.535384	-0.248211	-0.811737	0.667166	0.774944	-0.0175095	-0.811762	-0.758279	0.756133	2.40629	-0.80675	-0.715773
Z-score	Alistipes obesi	-0.567746	-0.0565017	0.486577	-0.722321	-0.90494	-0.278275	-0.141038	0.864866	-0.40848	0.418307	-0.929576	1.44386	-1.0851	-0.483175	0.0515861	-1.0851	-0.830617	2.72355	1.50412
Z-score	Eubacterium sp. 36_13 & CAG:86	-0.534263	0.784164	0.505549	-0.480495	-0.674013	0.103367	-0.0342757	-0.378308	0.3713	0.0997156	-0.478265	-0.585837	-0.446406	3.87633	-0.29983	-0.669299	-0.604396	-0.307623	-0.247409
Z-score	Proteus mirabilis	-0.41245	3.54036	-0.344905	-0.397815	-0.41245	-0.41245	-0.357464	-0.41245	0.153915	-0.41245	-0.13343	-0.0770331	-0.41245	-0.41245	2.05301	-0.41245	-0.41245	-0.41245	-0.312136
Z-score	Prevotella sp. 885	-0.620322	-0.546857	-0.627192	0.765361	-0.65717	-0.52458	1.05046	-0.645675	-0.543793	-0.65717	-0.213783	2.7228	0.134797	-0.65717	-0.656567	0.77486	2.15695	-0.652462	-0.602483
Z-score	Alistipes inops == Tidjanibacter massiliensis	0.457064	-0.307239	0.526363	-0.660712	-0.662235	-0.362555	-0.221801	0.379764	-0.213216	-0.280964	-0.633999	-0.656573	-0.662235	-0.0939091	0.39737	-0.662235	-0.662235	3.81065	0.508696
Z-score	Dorea sp. CAG:317	1.3991	-0.351792	-0.380065	-0.575122	3.62747	0.6606	-0.572726	-0.192237	-0.21544	-0.53295	-0.575122	-0.573607	-0.575122	-0.553493	0.423388	-0.575122	-0.575122	0.123832	0.0135305
Z-score	Eubacterium ventriosum	0.402798	2.04834	-0.195427	-1.02364	-0.777796	1.66116	-0.898901	-0.358404	1.53759	-0.0412388	-0.9523	-1.0699	-1.14382	0.78252	1.11713	-1.10033	-0.157934	0.542747	-0.372593
Z-score	Roseburia sp. CAG:182	-0.328594	-0.217383	0.173379	-0.302484	-0.568253	-0.549682	-0.317184	-0.560108	-0.561035	-0.483346	0.937667	-0.565531	3.74883	-0.490954	0.407669	0.941637	-0.568253	-0.240017	-0.456356
Z-score	Klebsiella variicola	0.929466	-0.283122	0.116331	0.505415	-0.517719	-0.517719	0.153787	-0.496067	3.89856	-0.516957	-0.169868	-0.48978	0.0849441	-0.517719	-0.381309	-0.507885	-0.340588	-0.494865	-0.454903
Z-score	Anaerotignum lactatifermentans	1.93118	-0.248902	-0.0548412	-0.525374	-0.525374	-0.456502	-0.461634	0.177435	3.53155	-0.209668	-0.525374	-0.525374	-0.525374	-0.525374	-0.138341	-0.525374	-0.525374	0.0478091	0.0849048
Z-score	Clostridium sp. CAG:253	-0.00499873	0.770996	2.19036	-0.958063	-1.24279	2.21588	-0.218242	0.164	-0.979673	-0.018038	0.436475	-0.790575	-0.825778	0.730106	1.13117	-0.81065	-0.265232	-0.747317	-0.777634
Z-score	Ruminococcus sp. CAG:60 / Blautia sp. 2789STDY5608836	3.65127	-0.499724	-0.208535	-0.459514	-0.819529	-0.296085	-0.813039	0.73979	-0.664291	0.275829	0.685918	-0.790598	-0.432514	-0.485366	0.632356	0.0393615	0.41053	-0.233666	-0.732198
Z-score	Megasphaera massiliensis	-0.357953	-0.3832	-0.332532	-0.3832	-0.3832	-0.0522149	4.11077	0.558715	0.0462886	0.090838	-0.3832	-0.3832	-0.3832	0.0403648	-0.3832	-0.378868	-0.3832	-0.328396	-0.331412
Z-score	Tyzzerella nexilis	-0.387757	0.982553	-0.340112	-0.463093	3.57656	-0.12541	-0.432011	-0.485726	1.6266	-0.285911	-0.387931	-0.389998	-0.486441	-0.486441	-0.478287	-0.486441	-0.477245	-0.324978	-0.147927
Z-score	Clostridium sp. 44_14 & CAG:277	-0.514448	0.0915243	0.488773	-0.407853	-0.72617	-0.341224	-0.592085	0.23231	-0.419826	-0.72617	0.313763	-0.245076	-0.662343	3.6114	-0.193729	-0.0627241	1.43714	-0.62976	-0.653492
Z-score	Ruminococcus lactaris	0.951409	0.00856222	-0.150631	-1.18958	-0.942858	0.926842	-1.24234	0.331142	0.24103	0.673411	-0.332946	-0.694843	-1.14271	1.455	1.98872	-1.43193	1.49174	-0.30379	-0.636238
Z-score	Bacteroides sp. CAG:462	-0.608594	-0.269314	0.381706	-0.636451	-0.64272	-0.282983	2.49424	1.65365	-0.096843	2.34335	-0.64272	-0.64272	-0.64272	-0.64272	0.411663	-0.64272	-0.64272	-0.521276	-0.370106
Z-score	Firmicutes bacterium CAG:102	-0.546036	0.450899	-0.320207	-1.04741	1.72547	0.0788847	-1.30419	-0.443999	0.674677	0.16822	-0.935808	2.16949	-0.917205	-0.268939	-0.415283	0.419975	1.99437	-0.663824	-0.819086
Z-score	Coprococcus comes	2.13675	-0.422993	-0.380344	-0.694014	-1.12211	2.00589	-1.14428	0.648181	-0.546049	0.66349	-1.08633	0.116046	-1.02446	0.713495	1.22614	-0.819058	0.336252	0.268964	-0.875564
Z-score	Prevotella sp. KHD1 & AG:487_50_53 & CAG:487	0.287254	0.386534	1.14027	-0.793681	-0.793681	1.34901	-0.737276	2.33586	1.34716	-0.793681	-0.785821	-0.793681	-0.793681	-0.221924	1.49317	-0.793681	-0.726614	-0.456891	-0.64865
Z-score	Bacteroides sp. CAG:770	-0.512425	-0.473841	-0.418225	0.496794	-0.512425	-0.473931	-0.108765	-0.512425	-0.500974	-0.512425	-0.216703	1.76904	0.0177118	-0.512425	-0.512425	3.53885	0.382908	-0.512425	-0.425895
Z-score	Ruminococcus callidus	0.201487	0.209925	-0.917936	-0.190285	-0.656439	-0.0968276	-0.985346	1.56772	-0.817907	0.46588	-0.337179	2.3466	-0.229505	-0.776228	-0.767069	-0.802872	2.33895	-0.00303379	-0.54994
Z-score	Bifidobacterium adolescentis	1.92046	-0.49631	-0.519134	-0.25374	-0.710097	-0.00465888	-0.208669	0.568106	-0.127978	0.0811908	-0.525532	3.38629	-0.529531	-0.619767	-0.0745308	-0.723107	-0.718061	0.156626	-0.601557
Z-score	Parabacteroides sp. SN4	-0.658903	-0.627745	0.194147	1.85297	-0.813401	0.813316	0.227163	-0.813401	-0.795982	-0.813401	0.0460703	-0.0535976	3.06976	-0.507406	-0.740349	-0.0935186	0.73745	-0.683344	-0.339832
Z-score	Fusobacterium ulcerans	-0.444863	0.893251	-0.444863	-0.444863	-0.444863	1.18967	-0.444863	-0.430015	3.62514	-0.444863	-0.444863	-0.444863	-0.444863	-0.444863	-0.444863	-0.444863	-0.444863	0.868992	-0.363811
Z-score	Eubacterium sp. CAG:180	0.277539	0.143407	-0.16706	-0.149286	-0.782045	0.912347	-0.660588	0.0538958	0.083546	-0.893855	-1.24316	1.61552	-0.0237401	1.05799	-0.0191638	-1.29874	-0.63651	2.77535	-1.04544
Z-score	Clostridium sp. CAG:510	-0.890179	-0.618268	-0.0386898	0.902621	-0.890179	0.36767	1.1991	-0.890179	-0.871164	-0.889792	0.638256	0.500212	0.273762	-0.890179	-0.889693	2.55917	1.64225	-0.609643	-0.605067
Z-score	Sellimonas intestinalis == Drancourtella massiliensis	1.24287	-0.246781	-0.504973	-0.701076	3.00711	1.42384	-0.651531	-0.274919	1.24929	0.623298	-0.705529	-0.436912	-0.705529	-0.578911	-0.560887	-0.705529	-0.705529	-0.413549	-0.354741
Z-score	Prevotella stercorea	-0.851365	1.0932	-0.769272	0.0642471	-0.851365	-0.647882	0.376301	-0.851255	0.188813	-0.195738	0.21445	1.34834	-0.032796	-0.851365	-0.851365	1.07147	2.97933	-0.844128	-0.589625
Z-score	Flavonifractor sp. An10	0.867432	-0.60896	1.73136	-0.3896	-0.620093	-0.281043	-0.620093	3.13539	0.379508	-0.558184	-0.620093	-0.620093	-0.620093	-0.620093	1.02095	-0.620093	-0.620093	0.137843	-0.473948
Z-score	Eubacterium sp. CAG:251 / Clostridium sp. A254.MGS-251	2.17167	-0.111718	-0.827242	-0.107144	-1.27042	0.806193	-0.452744	0.248202	-0.823626	-1.04873	0.148352	-0.702304	1.44945	-0.170802	-0.236111	-0.863153	0.0793275	2.33037	-0.619568
Z-score	Erysipelotrichaceae bacterium 3_1_53	0.81914	0.348729	-0.646656	-0.826805	-0.129493	1.26299	-0.826805	-0.570629	0.491474	0.0704549	-0.826805	0.903134	-0.826805	-0.500521	0.0411294	-0.826805	-0.826805	3.21235	-0.341281
Z-score	Cloacibacillus porcorum	-0.606489	0.491629	-0.328706	-0.40839	-0.630036	2.83638	-0.630036	-0.389755	-0.278642	-0.527172	-0.138739	-0.589208	-0.630036	2.56404	0.728117	-0.630036	-0.562071	0.140137	-0.410988
Z-score	Sutterella wadsworthensis 2	-0.592114	0.0273515	-0.151546	-0.12066	-0.605833	-0.364938	-0.505419	-0.436309	0.251953	0.327785	-0.422328	3.86751	-0.580495	-0.293003	-0.496862	-0.604865	1.07096	-0.416631	0.0454416
Z-score	Catenibacterium sp. CAG:290	-0.356421	-0.551595	-0.477116	0.566484	-0.656866	0.251617	-0.393221	-0.406496	-0.421883	-0.0227772	-0.16195	0.305649	4.01102	-0.576039	-0.095727	-0.270286	0.13502	-0.44738	-0.432034
Z-score	Ruminococcus sp. CAG:330	0.178448	-0.696941	-0.267775	0.649867	0.576173	-0.147385	-0.601355	-0.492346	-0.934678	-1.29783	-0.508101	2.54708	1.67371	0.248544	1.55816	-0.135327	-1.29783	-0.825759	-0.22665
Z-score	Clostridium sp. CAG:217	0.699528	-0.0969701	-0.634074	-0.695045	-1.06458	0.4172	-5.88614e-05	0.0983002	-0.710775	0.562758	-0.649157	-0.330845	-0.218895	-0.906099	0.860709	-0.728979	0.479316	3.49832	-0.580659
Z-score	Ruminococcus sp. 37_24 & sp. 2789STDY5834934	0.276348	-0.662263	0.136872	-0.804146	-0.804146	0.107563	-0.804146	-0.551555	-0.615461	0.689621	-0.804146	-0.804146	-0.804146	1.96228	2.66418	-0.804146	0.530748	1.23262	-0.141939
Z-score	Alistipes ihumii	-0.159938	-0.199336	0.0699449	-0.690554	-0.478278	-0.307094	-0.607863	0.511791	-0.278611	-0.451566	-0.706637	1.28537	-0.706637	-0.261517	0.0272233	-0.706637	-0.59958	3.64069	0.619227
Z-score	Fusobacterium varium	-0.338025	3.83504	-0.338025	-0.283418	-0.338025	-0.338025	-0.123969	-0.338025	1.58709	-0.338025	-0.305278	-0.338025	-0.338025	-0.338025	-0.338025	-0.338025	-0.338025	-0.338025	-0.315146
Z-score	Clostridium sp. CAG:352 / Ruminicoccus sp. 2789STDY5834969 & sp. 2789STDY5608859	-0.7438	0.268885	0.545788	-0.497773	-0.776469	2.76106	-0.65598	-0.481501	-0.282659	0.615948	-0.316003	-0.772426	-0.294297	-0.770809	2.23562	-0.771646	-0.776469	0.927898	-0.215373
Z-score	Butyrivibrio sp. CAG:318	-0.91542	-0.855698	0.763103	1.86337	-0.971162	1.74454	-0.683108	-0.0515047	-0.848461	-0.226105	-0.122095	1.23293	-0.195725	-0.0938092	2.09774	-0.932508	-0.971162	-0.465015	-0.369908
Z-score	Desulfovibrio fairfieldensis	-0.793921	-0.367239	-0.153389	-0.335384	-0.814307	-0.744044	1.40977	1.52272	0.00100916	-0.814307	-0.770516	-0.689563	-0.801046	0.11823	0.974349	-0.814307	-0.663558	2.62877	1.10674
Z-score	Eubacterium ramulus	1.99207	-1.15862	-0.771905	-1.05621	0.505337	1.69298	-1.38973	1.11541	-0.498897	0.482886	-0.931612	-0.492897	-0.864689	-0.228951	1.66415	0.0837517	0.0774114	0.380208	-0.600689
Z-score	Faecalibacterium prausnitzii 1 (A2-165)	-0.0807246	-0.226996	-0.552447	-0.622486	-1.19584	0.11365	-0.475866	1.0105	0.487252	0.403396	-0.580358	3.61175	-0.362614	-0.97291	0.495251	-0.596845	-0.0388175	-0.138845	-0.277048
Z-score	Alistipes sp. CAG:514	0.0450418	-0.451293	-0.156136	-0.456471	-0.458672	-0.408364	-0.452687	-0.431403	-0.312502	-0.420436	-0.373275	0.00268147	1.54504	-0.404433	-0.45839	3.77929	-0.3394	0.183685	-0.432271
Z-score	Roseburia sp. CAG:303	-0.300883	0.989293	0.29245	-0.619153	-0.641997	0.851903	-0.620398	-0.0684677	0.571422	-0.0323075	-0.641997	-0.641997	-0.641997	3.64907	-0.541985	-0.48505	-0.641997	-0.24794	-0.227971
Z-score	Firmicutes bacterium CAG:176	0.812827	-0.902345	0.0318176	-0.146885	-1.19106	-0.292911	0.107584	1.06695	-0.870595	-0.288014	-0.721894	2.22993	-0.354085	0.0166284	0.282794	-0.929381	-1.01155	2.50973	-0.349547
Z-score	Dorea longicatena 1	2.99935	-0.900725	-0.355436	-0.324843	-1.13836	0.755065	-0.682862	0.770917	-0.621805	0.657775	-0.614606	-0.0441022	-0.844287	0.55907	1.29234	-0.870908	-0.529475	0.686409	-0.79351
Z-score	Clostridium saccharolyticum 2	0.948296	-0.131845	0.869341	-0.77239	-0.140572	-0.0640415	-0.12139	0.115156	3.53096	-0.352974	-0.774575	-0.771647	-0.774575	0.0736063	-0.629117	-0.774575	-0.739003	-0.29962	0.808963
Z-score	Barnesiella sp. An22	-0.479546	-0.455341	1.69779	-0.479546	-0.479546	-0.161566	-0.479546	-0.479546	0.414041	-0.479546	-0.479546	-0.479546	-0.479546	-0.479546	-0.479546	-0.479546	-0.479546	3.23365	1.50553
Z-score	Firmicutes bacterium CAG:110	0.586285	-0.607369	0.726006	0.87006	-1.50565	-0.210705	-1.23749	0.344443	-0.784674	-0.73887	-0.869668	1.439	2.32165	-0.703755	0.762087	0.498801	-1.46671	0.390328	0.18623
Z-score	Veillonella parvula	-0.327436	0.742275	2.44044	-0.433213	-0.817922	-0.641842	0.291375	-0.485371	2.58013	-0.518205	0.832151	-0.654819	-0.616305	0.666127	-0.597106	-0.745456	-0.700975	-0.440108	-0.573747
Z-score	Firmicutes bacterium CAG:145	1.14116	-0.58862	-0.466236	-0.647699	-0.356038	0.0876464	-0.660605	1.39724	-0.281347	-0.574917	-0.660605	-0.660015	-0.660605	3.27097	0.368388	-0.656163	-0.660605	0.845508	-0.237456
Z-score	Alistipes indistinctus	-0.854598	0.659451	0.0592766	-0.807863	-1.18271	0.587408	2.1428	0.237019	-0.399118	-0.342818	-1.12149	1.35007	-1.18271	-0.717805	0.313376	-1.18271	-0.314123	1.62402	1.13252
Z-score	Clostridium sp. CAG:411	-0.282567	-0.306595	2.28647	-0.392682	-0.440057	-0.440057	0.441667	-0.440057	-0.440057	-0.440057	-0.440057	-0.440057	-0.432449	-0.440057	3.32922	-0.440057	-0.440057	-0.199719	-0.0427758
Z-score	Faecalibacterium prausnitzii 7	0.372457	1.85756	0.0799797	-0.903178	-1.09175	-0.274525	-0.171226	0.383522	-0.824853	0.249804	-1.08886	-0.425559	-1.09175	0.514094	0.425442	-1.09175	-0.324226	2.77591	0.628893
Z-score	Ruminococcus sp. UNK.MGS-30	-0.260045	0.817258	-0.578332	-0.475597	-0.820662	0.633509	-0.302072	2.4303	0.430273	-0.615234	-0.365304	-0.482675	-0.926495	-0.716256	2.67049	-0.970491	0.187416	-0.272437	-0.383647
Z-score	Bacteroides sp. CAG:545	-0.535203	-0.583711	0.139444	0.76613	-0.583711	-0.373219	-0.529555	-0.546622	-0.583508	-0.46048	-0.190162	0.117059	0.166544	1.06715	-0.562305	3.76327	-0.583711	-0.257819	-0.229588
Z-score	Brachyspira sp. CAG:484	-0.261862	-0.433561	2.89999	-0.433561	-0.433561	-0.429713	-0.433561	2.81867	-0.34301	-0.433561	-0.433561	-0.433561	-0.433561	-0.433561	-0.0975939	-0.433561	-0.433561	0.391645	-0.208956
Z-score	Clostridium butyricum	-0.444873	-0.0490584	2.85226	-0.0271347	-0.444873	-0.421015	2.83472	-0.444873	0.445519	-0.444873	-0.363055	-0.444873	-0.444873	-0.444873	-0.418876	-0.444873	-0.444873	-0.444873	-0.404626
Z-score	Firmicutes bacterium CAG:534	-0.494153	-0.501585	0.149556	-0.270329	-0.501585	-0.466333	0.256015	-0.501585	-0.500925	-0.253482	-0.357685	-0.501585	0.720601	-0.501585	0.824051	3.88089	-0.501585	-0.0803976	-0.398295
Z-score	Oscillibacter sp. KLE 1728 & KLE 1745 / Oscillospiraceae VE202-24	-0.55917	0.467316	0.125895	-1.04504	0.562768	-0.19386	-0.698136	2.13366	1.61106	0.583197	-1.19666	1.05855	-1.19666	-0.587468	-0.201451	-1.19666	-1.14991	0.105803	1.37676
Z-score	Lactobacillus ruminis	-0.743704	-0.611596	-0.533089	1.43651	-0.75065	0.214474	1.65594	-0.75065	-0.719046	-0.1994	1.10716	2.47313	1.20169	-0.75065	-0.444462	-0.497121	-0.75065	-0.683516	-0.654367
Z-score	Erysipelotrichaceae bacterium 5_2_54FAA / Eubacterium sp. 3_1_31	0.978184	-0.422856	-0.456201	-0.58332	3.49729	-0.240124	-0.58332	-0.470386	-0.151392	-0.0801513	-0.58332	-0.549042	-0.58332	0.0467965	-0.0531169	-0.58332	-0.58332	-0.244955	1.64588
Z-score	Bacteroides fluxus	-0.462263	0.411045	-0.248899	-0.574965	-0.574965	1.68579	-0.574965	3.03534	-0.224745	-0.574965	-0.574965	1.60968	-0.574965	-0.574965	-0.574965	-0.574965	-0.574965	-0.553126	0.496819
Z-score	Eubacterium sp. 38_16 & CAG:146	3.00805	-0.388713	-0.834633	-0.706145	-0.976703	1.85011	-1.07248	0.0204237	0.533578	0.0195213	-0.50156	-1.03377	0.0838519	0.490019	0.33481	-0.652712	0.14299	0.39692	-0.713556
Z-score	Fusobacterium mortiferum	-0.43372	0.626281	-0.433672	-0.325678	-0.43372	-0.432616	-0.311243	-0.43372	2.62411	-0.43372	-0.425772	-0.303212	-0.43158	3.02919	-0.43372	-0.43372	-0.180564	-0.421533	-0.411382
Z-score	Clostridium leptum	0.296033	0.454656	-0.329958	-0.97038	-0.154825	0.337204	-0.933457	-0.128743	3.08295	-0.191415	-1.01194	-0.579551	-1.00382	0.498007	1.28693	-0.960832	-0.996986	0.805399	0.500726
Z-score	Klebsiella michiganensis 2	0.834374	-0.0687221	1.75857	0.0377292	-0.581783	-0.298197	-0.526095	-0.581783	0.10479	-0.461365	-0.311858	-0.451889	-0.550961	-0.581783	-0.134422	-0.581783	-0.557442	3.47242	-0.519793
Z-score	Flavonifractor sp. 2789STDY5834931	-0.37717	0.984257	-0.351252	-0.788466	0.82742	-0.606254	-0.789801	1.98352	2.65301	-0.514039	-0.797825	0.931763	-0.797825	-0.312965	-0.73989	-0.797825	-0.764109	-0.180128	0.437583
Z-score	Clostridium sp. CAG:413	-0.350344	-0.328938	-0.103151	-0.127531	-0.350344	-0.258298	-0.249672	-0.343421	-0.257208	-0.238145	-0.198217	-0.209669	4.2083	-0.343072	-0.120266	0.184484	-0.348547	-0.21702	-0.34894
Z-score	Anaerotruncus sp. CAG:390	-0.936689	-0.914975	2.71601	0.0454153	-0.936689	-0.0734007	1.98271	-0.936689	-0.794021	1.04688	-0.255857	-0.124603	0.055372	-0.936689	0.32838	0.625308	-0.624402	0.41622	-0.682287
Z-score	Clostridium sp. CAG:43	-0.828666	1.65953	0.73235	-0.890665	-0.165111	-0.24399	-1.29255	0.719191	1.93048	0.357065	-0.986082	1.91316	-1.18443	-0.0160097	-0.405401	-0.817594	0.712383	-0.518407	-0.675258
Z-score	Clostridium paraputrificum	-0.171672	-0.163925	0.116125	-0.393297	3.9257	-0.0549468	-0.0375587	-0.471127	1.18129	-0.412875	-0.419791	-0.47588	-0.486408	-0.413054	0.00413718	-0.486408	-0.486408	-0.425658	-0.328248
Z-score	Bacteroides sp. An19 & An51A & An269 & An279 & CAG:702	-0.292188	-0.293126	4.21321	-0.293126	-0.293126	-0.159004	-0.293126	0.158102	-0.162582	-0.293126	-0.293126	-0.293126	-0.293126	-0.293126	-0.0041369	-0.293126	-0.293126	-0.235898	-0.293126
Z-score	Fournierella massiliensis	-0.39719	-0.299159	-0.06069	-0.39719	-0.39719	-0.39719	0.164205	1.54141	3.81286	-0.39719	-0.39719	-0.161084	-0.39719	-0.39719	-0.376723	-0.39719	-0.39719	-0.395175	-0.253742
Z-score	Oscillibacter sp. CAG:241	-0.368501	-0.630489	-0.232649	-0.285858	-0.677657	0.668231	-0.187764	0.0462564	-0.568401	-0.522095	-0.536873	3.94517	0.198654	-0.447721	0.0540707	-0.0422738	-0.547508	0.50695	-0.371542
Z-score	Clostridium sp. CAG:169	0.789192	-0.576846	-0.0442473	-0.897752	-0.90811	1.18121	-0.90811	0.473131	-0.335952	-0.035243	-0.90811	-0.336728	-0.90811	2.76181	1.38399	-0.90811	-0.90811	0.936188	0.149919
Z-score	Mitsuokella jalaludinii	-0.418698	-0.475005	0.00149681	0.425679	-0.486616	0.502009	0.607017	-0.302085	-0.0106021	-0.486616	-0.468409	3.974	-0.216659	-0.394487	-0.410233	-0.477564	-0.471663	-0.473321	-0.418243
Z-score	Clostridium asparagiforme == lavalense	-0.296665	1.08894	0.490305	-1.09364	0.34654	1.14174	-0.501219	0.0912808	2.78275	0.502051	-1.11366	1.12273	-1.11366	-0.847578	-0.182367	-1.11366	-0.837814	-0.416542	-0.0495417
Z-score	Firmicutes bacterium CAG:170	-0.866037	-0.37092	-0.01575	0.521924	-1.00928	-0.663807	0.167483	-0.434984	-0.39422	-0.96716	-0.199319	2.71968	1.75387	-0.270847	0.761506	1.48919	-0.685439	-0.627098	-0.908802
Z-score	Clostridium saudiense	1.47569	-0.567676	-0.584584	-0.672377	1.88268	0.650087	-0.907629	-0.569447	0.716417	0.0674926	1.15096	-0.972611	-0.856574	-0.80349	2.02997	-0.931604	-0.749574	0.45704	-0.814777
Z-score	Intestinimonas butyriciproducens	-0.265939	0.0133387	-0.025828	-0.596926	3.92647	-0.399809	-0.291815	0.0161589	0.834652	-0.495982	-0.660889	-0.139972	-0.64829	-0.428107	-0.119785	-0.646105	-0.585489	0.245461	0.268857
Z-score	Ruminococcus champanellensis	-0.381851	-0.348379	-0.164516	-0.328261	-0.408865	0.0244908	-0.392989	0.209041	-0.35873	-0.381426	-0.274048	-0.358972	0.281846	-0.362621	-0.0767706	4.15305	-0.408865	-0.0824887	-0.339643
Z-score	Aeromonas veronii	-0.36032	0.101494	-0.36032	0.558141	-0.36032	-0.36032	-0.36032	-0.36032	4.1087	-0.36032	-0.252196	0.209054	-0.36032	-0.36032	-0.36032	-0.0410268	-0.36032	-0.36032	-0.36032
Z-score	Anaeromassilibacillus sp. Marseille-P3371 & Clostridia bacterium UC5.1-1E11	2.70753	-0.826258	0.499791	-0.831219	-0.831219	0.513277	-0.831219	0.221752	2.02406	-0.162529	-0.831219	-0.831219	-0.831219	0.306271	0.612131	-0.831219	-0.831219	0.274496	0.479236
Z-score	Clostridium sp. 2789STDY5608884	-0.243379	-0.413238	0.0852581	0.726811	-0.834975	-0.445695	0.539968	-0.283743	-0.449761	-0.759586	0.82959	-0.184479	0.0161474	-0.701892	-0.430211	3.77596	-0.314654	-0.540469	-0.371646
Z-score	Gemmiger formicilis	2.67736	0.658165	-0.403325	-0.89052	-1.26339	-0.384209	-0.687021	1.2534	0.551106	0.15692	0.448757	0.328922	-0.895944	-0.748944	1.42332	-1.21186	-0.957805	0.319773	-0.374721
Z-score	Rhodospirillum sp. UNK.MGS-17 / Azospirillum sp. 47_25 & CAG:260	-0.534926	-0.273024	2.05137	-0.853264	-0.853264	1.83672	-0.853264	0.139755	1.61765	1.48381	-0.853264	-0.747002	-0.853264	-0.747893	-0.0247071	-0.853264	-0.151535	-0.313132	0.782506
Z-score	Bacteroides pectinophilus	3.08235	-0.73509	0.629178	-0.550964	-0.786837	1.62076	0.578434	-0.620802	-0.786837	-0.297007	-0.150045	-0.786837	1.08515	-0.779294	-0.0710663	-0.786837	-0.721666	0.114949	-0.0375384
Z-score	Bacteroides barnesiae	-0.369672	-0.0835614	4.08751	-0.369672	-0.369672	-0.369672	-0.369672	0.380899	-0.369672	-0.369672	-0.369672	-0.369672	-0.369672	-0.369672	0.471776	-0.33619	-0.369672	-0.326022	0.24165
Z-score	Eubacterium sp. CAG:156	-0.311864	1.88577	-0.432352	-1.01231	2.26993	0.772017	-0.995776	-0.557537	0.262357	-0.811755	-0.421548	-0.945013	-1.00776	1.49016	0.86401	-0.865891	0.134959	0.33342	-0.650812
Z-score	Merdimonas faecis	1.18701	-0.555139	-0.308293	-0.69572	-0.700289	1.89942	-0.370908	2.83649	0.904942	-0.100688	-0.700289	-0.700289	-0.700289	-0.540496	-0.537033	-0.700289	-0.700289	0.712471	-0.230325
Z-score	Streptococcus salivarius	2.31854	0.0132511	-0.823369	-0.315841	-0.998114	1.59935	-0.76982	0.934845	2.28032	-0.145868	-0.361165	-0.538015	0.0612757	-0.34746	-0.264737	-0.927125	-0.3355	-0.509951	-0.870626
Z-score	Alistipes senegalensis	-0.359635	-0.320799	0.0249121	0.6404	-0.923082	0.0462838	-0.0391124	0.194737	-0.407301	-0.856515	-0.563572	3.69595	-0.732381	-0.56611	0.577608	-0.892974	-0.364868	0.654417	0.192041
Z-score	Dialister succinatiphilus	-0.271526	-0.0301825	-0.0818722	-0.308978	-0.309586	-0.221989	4.22496	-0.204955	-0.111189	-0.0626847	-0.30937	-0.283122	-0.309586	-0.309586	-0.280409	-0.309586	-0.309586	-0.279292	-0.231467
Z-score	Ruminococcaceae bacterium D16	-0.361153	0.944173	-0.0791669	-0.779745	-0.790459	0.47255	-0.790459	1.0372	2.32701	-0.600685	-0.790459	-0.743431	-0.790459	-0.748174	1.92709	-0.790459	-0.790459	0.0385042	1.30858
Z-score	Firmicutes bacterium CAG:882	-0.3343	-0.332139	-0.43576	1.06147	-0.460038	0.367498	-0.417127	-0.458623	-0.0885173	-0.321177	0.393661	-0.454616	3.90332	-0.460038	-0.449839	-0.231876	-0.460038	-0.459144	-0.362719
Z-score	Faecalibacterium prausnitzii 3 ( L2-6)	-0.348551	0.250023	-0.472218	-0.51689	3.96998	-0.216665	-0.330564	-0.0484507	0.0468904	0.324807	-0.393821	0.75391	-0.301253	-0.704014	-0.109865	-0.680602	-0.316096	-0.490834	-0.415783
Z-score	Faecalibacterium prausnitzii 4 (cf. KLE1255)	0.11001	0.536895	-0.307812	-1.03234	0.844539	-0.0498989	-0.0953628	2.53078	0.0795752	1.93384	-0.865514	1.15904	-0.525498	-0.947139	-0.0853901	-1.47421	-0.824702	-0.651655	-0.335152
Z-score	Bacteroides sp. CAG:1076	-0.183074	2.6249	-0.469708	-0.469708	-0.469708	-0.469708	1.06193	-0.469708	-0.0305501	-0.469708	-0.469708	2.83526	-0.469708	-0.469708	-0.469708	-0.469708	-0.469708	-0.202266	-0.469708
Z-score	Oscillibacter sp. CAG:155	-0.486782	0.534862	0.567118	-0.21764	-0.686901	0.0861636	-0.686901	2.63995	-0.247571	0.215087	-0.686901	-0.686901	-0.686901	2.69477	-0.333221	-0.686901	-0.686901	-0.0573305	-0.587108
Z-score	Firmicutes bacterium CAG:238	-0.196361	-0.433906	0.450999	-0.326392	-0.50902	-0.0641363	-0.480906	-0.477235	-0.506492	-0.447321	-0.438273	-0.321148	0.221586	-0.344479	0.572595	4.00222	-0.50902	0.218374	-0.411082
Z-score	Brachyspira sp. CAG:700	-0.532024	-0.38038	-0.265702	0.755837	-0.532024	-0.354936	-0.532024	-0.531424	0.164175	-0.532024	-0.0475534	-0.532024	1.86014	-0.532024	-0.511701	3.46164	-0.133274	-0.326288	-0.498392
Z-score	Adlercreutzia equolifaciens	3.99284	-0.277936	-0.369262	-0.554994	-0.57346	0.127275	-0.452941	0.0946544	-0.222042	0.264809	-0.547711	-0.263151	-0.57346	0.028757	0.664832	-0.57346	-0.510016	0.0901668	-0.344903
Z-score	Faecalibacterium prausnitzii 5	0.477998	-0.773871	-0.374884	-0.349872	-0.819393	-0.146535	-0.625266	0.247352	-0.772224	0.297918	0.21367	2.75098	2.63684	-0.575352	-0.0626792	-0.420139	-0.70183	-0.445156	-0.557563
Z-score	Enterococcus faecium	2.45777	-0.411643	-0.422271	-0.36921	-0.62347	2.64096	-0.433308	0.851656	1.13361	-0.508499	-0.5395	-0.582843	-0.5929	-0.607575	-0.508896	-0.62347	-0.549225	0.235561	-0.546745
Z-score	Ruminococcus sp. CAG:403	3.02078	-0.177474	0.0779308	0.04988	-0.919967	0.992057	-0.758789	1.3626	-0.836958	-0.919967	-0.489437	-0.377635	0.0463889	1.06437	0.0923581	-0.919967	-0.919967	0.411917	-0.798118
Z-score	Lactobacillus mucosae	4.01053	-0.0754432	-0.436925	-0.0751816	-0.454825	1.01835	-0.30059	-0.454825	-0.391692	-0.12498	0.0480579	-0.31019	-0.230633	-0.371482	-0.301098	-0.260408	-0.398212	-0.440644	-0.44981
Z-score	Pyramidobacter piscolens	-0.527384	3.28989	-0.506375	-0.506135	-0.527384	-0.137126	-0.384559	1.97553	0.930647	-0.485109	-0.160508	0.434386	-0.527384	-0.527384	-0.527384	-0.527384	-0.527384	-0.527384	-0.231573
Z-score	Bacteroides sp. CAG:144	-0.72931	-0.734225	1.39436	-0.669659	-0.761151	0.00828598	-0.755604	1.89124	1.34217	0.59502	-0.761151	-0.761151	-0.761151	2.38043	-0.100544	-0.761151	-0.761151	0.170964	-0.226221
Z-score	Duodenibacillus massiliensis	-0.479448	-0.432567	-0.229181	0.195878	-0.480431	-0.19349	0.044894	-0.40129	-0.400517	-0.327544	1.69638	3.71828	-0.313373	-0.465413	-0.327532	-0.480431	-0.376477	-0.462148	-0.285593
Z-score	Bacteroides sp. CAG:709	-0.558913	-0.596975	-0.100668	0.225036	-0.604717	-0.58218	-0.603662	-0.604717	-0.579428	-0.267214	-0.161122	1.95783	0.199471	-0.604717	-0.582089	3.43777	-0.00278655	-0.0428496	0.0719313
Z-score	Bifidobacterium bifidum	3.33496	-0.35376	-0.584726	-0.575881	-0.651068	0.0428238	-0.423966	1.382	0.0166764	0.0493468	-0.59865	1.55102	-0.541156	-0.63966	-0.239685	-0.651068	-0.651068	-0.0314288	-0.434707
Z-score	Romboutsia timonensis	0.809223	0.424053	-0.527961	-0.316119	-0.660423	0.642764	-0.462008	-0.387452	-0.416059	-0.286588	3.80525	-0.716838	-0.339804	-0.464414	0.496841	-0.575784	-0.257249	-0.218527	-0.548906
Z-score	Dialister sp. CAG:486	-0.735775	-0.711926	-0.386072	1.89206	-0.779229	-0.615684	0.496166	-0.779229	-0.581057	-0.541709	1.27897	1.89747	2.13474	-0.779229	-0.561624	0.0916606	0.105292	-0.740893	-0.683947
Z-score	Eubacterium sp. CAG:786	-0.403265	-0.403265	0.507584	0.838252	-0.403265	-0.336656	-0.300186	-0.403265	-0.403265	-0.403265	-0.000381719	-0.393283	-0.0136534	-0.403265	-0.297986	-0.399168	3.99877	-0.399722	-0.380713
Z-score	Bacteroidales bacterium H5	2.78708	-0.399797	-0.399797	-0.399797	-0.399797	-0.399797	-0.399797	-0.399797	-0.399797	-0.399797	-0.399797	-0.399797	-0.399797	-0.399797	2.86183	-0.399797	-0.399797	0.714394	-0.366342
Z-score	Alistipes timonensis	-0.409475	-0.267504	0.299469	-0.528617	-0.766617	-0.115223	-0.720367	-0.284114	-0.0222577	-0.499572	-0.766617	-0.163548	-0.766617	3.1415	0.432351	-0.766617	-0.701445	1.89016	1.01511
Z-score	Eubacterium sp. CAG:274	1.86367	2.13932	0.339515	-0.661494	-0.83619	0.957941	-0.825208	1.81961	0.508369	-0.800657	-0.83619	-0.79968	-0.83619	0.460822	-0.262786	-0.83619	-0.815558	-0.15261	-0.4265
Z-score	Blautia obeum	2.95516	-0.446486	-0.61133	-0.670834	-0.685169	1.49366	-0.800163	1.34629	-0.113863	0.348906	-0.352481	-0.864785	-0.64284	-0.29791	1.15147	-0.797413	-0.363829	0.0483647	-0.696748
Z-score	Actinomyces oris	3.77476	-0.608248	-0.662808	-0.544831	-0.683151	0.362336	-0.653234	-0.0317487	-0.239986	0.70676	-0.111569	0.940089	-0.288308	-0.683151	-0.184269	-0.683151	-0.199944	-0.268591	0.0590461
Z-score	Oribacterium sinus	0.912035	-0.202643	-0.378102	-0.489901	-0.50751	-0.350111	-0.459304	-0.263898	3.2511	-0.50751	-0.264487	-0.374882	-0.50751	-0.50751	-0.401194	-0.50751	-0.50751	-0.132837	2.19928
Z-score	Firmicutes bacterium CAG:272	-0.831802	-0.790916	0.897389	1.46795	-0.932841	0.0331053	-0.652631	-0.35291	-0.883814	-0.58132	-0.478255	0.14173	1.9923	-0.932841	0.392351	2.25571	-0.889487	0.79745	-0.651164
Z-score	Candidatus Gastranaerophilales bacterium HUM_21 / Heliobacterium sp. N15.MGS-306 / Clostridium sp. UNK.MGS-6 & K4410.MGS-306 & CAG:306	0.88872	-0.458867	3.51821	-0.598946	-0.602794	-0.437355	-0.569707	-0.564613	-0.521644	0.0495409	-0.602794	-0.319733	-0.602794	-0.0491298	0.112845	-0.602794	-0.602794	0.60168	1.36297
Z-score	Faecalibacterium sp. CAG:82	-0.534254	-0.598355	-0.47041	-0.562574	2.66831	-0.042169	-0.671437	0.0928528	-0.669126	0.235399	-0.176252	2.90907	-0.478645	-0.658991	0.19743	-0.419916	0.0111006	-0.504925	-0.32711
Z-score	Catenibacterium mitsuokai	-0.341421	-0.356964	-0.27724	0.280087	-0.358663	-0.196205	-0.320187	-0.294469	-0.31183	-0.358663	-0.075083	0.130632	4.1832	-0.308578	-0.293984	-0.216602	-0.358663	-0.288643	-0.236725
Z-score	Clostridium sp. CAG:167	1.46999	-0.897424	2.09246	-0.985253	0.524925	0.437822	-0.954077	0.399826	-0.937647	-0.279443	-0.950861	-0.871709	-0.972331	0.303509	2.10248	0.135376	-0.985253	0.259357	0.108253
Z-score	Firmicutes bacterium CAG:94	0.717866	-0.643123	0.714819	-0.65914	-0.67288	0.0563357	-0.666502	1.53943	0.321255	-0.224857	-0.67288	-0.667394	-0.67288	-0.616679	3.30814	-0.67288	-0.67288	0.320527	-0.136275
Z-score	Firmicutes bacterium CAG:41 / Clostridium sp. 2789STDY5834935 & sp. 2789STDY5608853	2.99732	0.316776	-0.269233	-0.939569	0.204101	1.26649	-0.773319	0.095269	0.833323	-0.315825	-1.04841	-0.963745	-0.884159	0.529074	0.951877	-1.16922	-0.549317	0.182846	-0.464275
Z-score	Bifidobacterium scardovii	-0.351869	-0.351869	1.46022	-0.351869	-0.351869	-0.351869	-0.351869	-0.351869	0.325058	-0.351869	-0.351869	-0.351869	-0.351869	-0.351869	-0.351869	-0.351869	-0.351869	-0.351869	3.84462
Z-score	Clostridium sp. 2789STDY5834874 & sp. 2789STDY5608885	-0.951653	-0.550051	0.7903	-0.312642	-1.65341	1.12661	-0.654143	0.713364	-0.520457	1.4114	-0.843177	2.25644	-0.958557	-0.824403	0.396482	0.268453	1.31419	-0.486391	-0.522351
Z-score	Dakarella massiliensis	-0.527864	-0.531481	0.311169	-0.531481	-0.531481	-0.0629175	-0.4969	2.31285	-0.16682	-0.527229	-0.531481	3.13655	-0.531481	-0.479166	-0.476215	-0.531481	-0.531481	0.0289858	0.667925
Z-score	Prevotella sp. CAG:891	-0.580015	1.08669	3.22136	-0.591768	-0.624247	-0.624247	-0.624247	1.39026	0.238238	0.81099	-0.624247	-0.616462	-0.624247	-0.624247	-0.624247	-0.624247	-0.624247	0.372794	0.286135
Z-score	Prevotella sp. CAG:485	-0.28838	-0.0808944	-0.0427559	-0.318657	-0.318657	-0.318657	-0.318657	0.375438	-0.150118	-0.318657	-0.318657	-0.318657	-0.318657	4.18308	-0.318657	-0.318657	-0.318657	-0.31363	-0.177509
Z-score	Firmicutes bacterium CAG:83	0.906436	0.181221	-0.311834	-0.944347	-1.35677	0.305821	-0.343285	0.303094	-0.250422	0.965948	-1.23806	2.49548	-0.899143	-1.01885	0.949998	-1.16413	-0.237536	1.42986	0.226528
Z-score	Clostridium phoceensis	-0.128384	-0.428646	0.90879	-0.98034	-0.2017	0.16548	-0.901965	2.34672	2.02659	0.305295	-1.11655	0.0944373	-1.12287	-0.4814	1.12114	-1.12104	-1.00915	0.318739	0.204854
Z-score	Ruminococcus sp. CAG:579	0.381314	1.28151	-0.315656	1.62413	-0.70474	-0.137428	-0.601227	-0.558157	-0.586505	-0.70474	-0.336989	-0.70474	2.98737	-0.70474	1.09551	-0.70474	-0.70474	-0.440039	-0.165386
Z-score	Mitsuokella multacida	-0.485308	0.126039	-0.357536	2.88112	-0.485308	-0.419915	2.82016	-0.393631	0.228682	-0.485308	-0.416875	-0.322048	-0.485308	-0.485308	-0.484293	0.0152252	-0.485308	-0.366932	-0.398144
Z-score	Veillonella sp. CAG:933	-0.281439	-0.281439	-0.281439	-0.281439	-0.281439	-0.281439	-0.281439	-0.281439	4.19581	-0.281439	0.354472	-0.281439	-0.281439	-0.281439	-0.281439	-0.281439	-0.281439	-0.281439	-0.0472569
Z-score	Lactococcus lactis subsp. lactis	0.688461	-0.747983	-0.719948	2.54099	0.979191	1.51972	-0.772587	-0.570922	-0.736167	-0.459021	-0.249172	-0.740681	1.51246	-0.727775	1.00621	-0.714305	-0.544195	-0.60186	-0.662414
Z-score	Acidaminococcus massiliensis	-0.353124	0.0810542	-0.353604	0.218278	-0.365584	-0.113816	-0.301759	-0.29066	0.388124	-0.365584	-0.351734	4.14205	-0.365584	-0.365584	-0.358003	-0.365584	-0.169995	-0.357424	-0.351466
Z-score	Eubacterium sp. CAG:603 & sp. 2789STDY5608818	-0.486109	-0.197445	0.115521	2.20096	-0.673303	-0.501458	-0.300443	-0.585729	-0.673303	-0.673303	0.0208481	-0.671781	1.34829	-0.673303	-0.37537	2.92994	-0.504617	0.0432355	-0.342633
Z-score	Enterococcus faecalis	-0.197748	-0.294689	-0.190148	-0.285223	-0.307364	0.572436	-0.300041	-0.291426	-0.291598	-0.284019	-0.275581	-0.306397	-0.305751	-0.307364	-0.231841	-0.307364	-0.302873	-0.255998	4.16299
Z-score	Ruminococcus sp. CAG:488	-0.625045	-0.417652	-0.257691	1.08846	-0.625045	-0.0372117	0.0713979	-0.625045	-0.612855	-0.624294	0.0474599	0.0360371	1.85344	-0.625045	-0.598531	3.29034	-0.339475	-0.46808	-0.531169
Z-score	Clostridium sp. CAG:590	2.06407	-0.807078	0.734188	1.36094	-0.813603	-0.790961	-0.813603	-0.813603	-0.813603	-0.813603	1.77418	0.227339	0.991869	-0.813603	-0.0637321	1.25003	-0.813603	-0.257051	-0.788578
Z-score	Megasphaera elsdenii	-0.669362	0.163783	-0.209992	-0.589976	-0.687113	1.27356	1.96573	-0.687113	2.03417	-0.687113	-0.667757	0.752193	1.88445	-0.687113	-0.687113	-0.687113	-0.687113	-0.507392	-0.619613
Z-score	Coraliomargarita sp. CAG:312	-0.501397	-0.477694	0.98552	3.70574	-0.525305	0.392194	-0.525305	0.374379	-0.439631	0.975824	-0.455295	-0.479192	-0.525305	-0.510184	-0.27588	-0.525305	-0.525305	-0.310358	-0.357497
Z-score	Dorea formicigenerans	2.38327	-0.559337	-0.93091	-0.32088	-1.45544	1.0079	-1.52291	0.510876	-0.240174	0.481597	0.474601	-0.340435	-0.395337	0.171453	1.0183	-0.84198	1.69083	-0.203821	-0.927601
Z-score	Firmicutes bacterium CAG:114	2.97771	-0.201059	-0.78586	-0.838619	-0.973028	0.506064	-0.953209	0.895322	-0.338818	0.222824	-0.886327	0.111902	-0.973028	-0.106609	1.52758	-0.973028	0.0938208	0.798862	-0.104497
Z-score	Clostridium glycyrrhizinilyticum	3.09757	0.29818	-0.51703	-0.840682	0.815935	1.08702	-0.826598	0.0345045	1.48836	-0.42725	-0.840682	0.217734	-0.840682	-0.709579	-0.170215	-0.840682	-0.770078	0.0802419	-0.336066
Z-score	Firmicutes bacterium CAG:321	0.118617	-0.0920814	0.186587	-0.290047	-0.854116	0.152645	-0.531874	-0.515787	-0.714509	-0.577211	-0.569236	-0.762605	0.4821	0.504777	1.47184	-0.711107	-0.822692	3.45936	0.0653353
Z-score	Bacteroidales bacterium H10	-0.435318	1.04784	-0.253295	-0.432575	-0.435318	-0.435318	-0.435318	-0.435318	1.48461	-0.435318	-0.435318	-0.435318	-0.435318	-0.435318	0.0397548	-0.435318	-0.435318	3.61832	-0.28083
Z-score	Prevotella sp. CAG:924	-0.390307	-0.0226518	2.76566	-0.390307	-0.390307	3.00915	-0.390307	-0.390307	-0.390307	-0.390307	-0.390307	-0.390307	-0.390307	-0.390307	-0.390307	-0.390307	-0.390307	0.102441	-0.390307
Z-score	Bacteroides gallinarum	-0.264597	-0.264597	-0.264597	-0.264597	-0.264597	-0.264597	-0.264597	-0.264597	-0.264597	-0.264597	-0.264597	-0.264597	-0.264597	-0.264597	-0.264597	-0.264597	-0.264597	0.287799	4.21034
Z-score	Anaerotruncus colihominis	-0.241707	1.21433	-0.108758	-1.08177	1.24437	0.292825	-0.930462	2.41975	1.28212	-0.715344	-1.15435	0.33815	-1.13156	0.505619	-0.282604	-1.15435	-0.986771	-0.132156	0.62268
Z-score	Clostridium sp. CAG:307	-0.532029	-0.546505	3.38003	0.292867	-0.573477	1.6549	-0.520071	-0.494478	-0.573477	-0.0628931	1.13069	-0.573477	0.196121	-0.533483	-0.328158	-0.572317	-0.573477	-0.363693	-0.407077
Z-score	Eubacterium sp. CAG:581	0.440407	-0.0548	-0.474708	-0.0798534	-0.772308	0.073752	0.291984	0.0300893	-0.877424	-0.78786	0.990471	-0.798081	3.59294	0.166261	0.530052	-0.0960513	-0.857425	-0.509299	-0.808145
Z-score	Dorea longicatena 2	1.33815	-0.0500131	-0.875481	-0.300553	-0.351109	0.356393	-0.860089	-0.334811	0.367411	-0.25441	0.246739	-0.269325	-0.300934	-0.402728	0.0107166	-0.775416	3.64898	-0.467662	-0.725861
Z-score	Firmicutes bacterium CAG:176_63_11	0.226031	0.181194	-0.284317	-0.798992	-0.473518	-0.657348	-0.462094	-0.532813	-0.620619	-0.795665	-0.945373	3.07987	1.38072	-0.710192	0.293473	-0.342765	0.216785	1.67361	-0.42799
Z-score	Alistipes sp. An31A	-0.532157	-0.516152	0.682391	-0.532157	-0.532157	1.86566	-0.532157	-0.532157	-0.367328	2.84106	-0.532157	-0.532157	-0.532157	-0.471924	-0.246644	-0.532157	-0.532157	1.8368	-0.302294
Z-score	Phascolarctobacterium succinatutens	-0.525776	-0.437399	-0.158391	0.569584	-0.7959	-0.105932	-0.695823	-0.343487	0.24365	-0.141792	-0.292947	0.368715	0.554976	-0.597391	-0.72095	3.78609	0.559037	-0.658599	-0.607664
Z-score	Clostridium sp. CAG:448	-0.435983	-0.47515	1.84168	-0.0245608	-0.487974	-0.10092	-0.423945	-0.487974	-0.487974	-0.487974	0.020374	-0.487974	0.153329	-0.487974	-0.281356	3.62173	-0.487974	-0.247921	-0.23145
Z-score	Clostridium sp. CAG:230	0.0224651	1.65307	-0.139619	-0.622437	0.174255	2.67589	-0.685851	0.866291	-0.247626	1.06771	-0.569287	-1.04544	-0.986567	0.714733	0.503879	-1.18758	-0.957656	-0.605125	-0.631103
Z-score	Alistipes sp. CHKCI003	-0.280396	-0.13673	-0.280396	-0.280396	-0.280396	-0.280396	-0.280396	-0.280396	-0.280396	0.435775	-0.280396	-0.280396	-0.280396	-0.280396	-0.280396	-0.280396	-0.280396	4.1873	-0.280396
Z-score	Escherichia fergusonii	-0.319429	-0.156523	-0.319429	0.834852	-0.319429	-0.319429	-0.319429	-0.319429	-0.237377	-0.319429	4.09773	-0.319429	-0.319429	-0.319429	-0.319429	-0.319429	-0.0709646	-0.319429	-0.315135
Z-score	Pseudoflavonifractor sp. An184	-0.371117	-0.299464	2.56948	-0.315636	-0.487324	-0.411053	-0.472602	3.04372	0.700692	-0.413819	-0.487324	-0.464382	-0.487324	-0.404861	-0.252459	-0.487324	-0.487324	-0.306476	-0.1654
Z-score	Clostridium sp. CAG:245	-0.0260502	0.248281	1.1314	-0.307958	-1.15018	-0.224841	0.508996	-0.929188	-0.495767	-0.737985	0.50438	-0.856938	-0.88864	2.65596	1.25113	-1.16338	-0.941358	1.2713	0.150843
Z-score	Eubacterium sp. CAG:192	0.803285	2.65734	-0.193068	-1.07028	-1.07028	1.18907	-1.02041	0.423232	-0.281434	0.308419	-0.629792	-0.928017	-1.06379	0.635772	1.32514	-1.07028	-0.510904	0.0515478	0.444453
Z-score	Anaerostipes hadrus 2	1.39635	-0.684371	-0.213055	-0.78814	-0.804254	2.15898	-0.788951	0.975452	-0.760951	1.54043	-0.734766	-0.759953	-0.772729	1.46793	0.522794	-0.804254	-0.804254	0.490043	-0.636306
Z-score	Subdoligranulum sp. CAG:314	-0.672866	-0.604957	2.41352	-0.711219	-0.711219	0.0403996	-0.711219	0.0472416	-0.333087	-0.131066	-0.711219	-0.237858	-0.711219	1.82398	0.229093	-0.711219	-0.711219	0.11637	2.28776
Z-score	Enorma massiliensis	0.230889	-0.17288	-0.33637	-0.415736	-0.415736	4.07176	-0.385712	-0.0827654	-0.323923	-0.116129	-0.40407	-0.415736	-0.403	0.0395787	-0.394351	-0.415736	-0.415736	0.697548	-0.341894
Z-score	Fusobacterium sp. CAG:439	-0.220762	-0.261015	1.88345	-0.404121	-0.404121	-0.400891	-0.404121	-0.355905	-0.0407636	-0.157842	-0.404121	-0.404121	-0.404121	3.66002	-0.401389	-0.404121	-0.404121	-0.0825611	-0.389371
Z-score	Firmicutes bacterium CAG:475	-0.687049	-0.723086	2.9537	1.56568	-0.731981	0.51525	-0.394587	-0.255383	-0.731981	-0.731981	1.30688	-0.717512	-0.69112	-0.731981	0.837735	-0.433618	-0.731981	0.206075	0.176935
Z-score	Prevotella sp. CAG:1124	-0.558545	0.245483	1.56915	-0.558545	-0.558545	-0.558545	-0.558545	1.41404	1.98722	-0.558545	-0.558545	-0.558545	-0.558545	-0.558545	2.50305	-0.558545	-0.558545	-0.55009	-0.466315
Z-score	Anaerotruncus sp. CAG:528	-0.585965	-0.480605	-0.133406	-0.485942	1.10798	-0.643729	-0.517272	-0.330603	-0.643729	-0.406013	-0.608855	-0.643729	-0.636741	2.80017	0.0258297	-0.606451	2.35147	0.742493	-0.30491
Z-score	Bifidobacterium dentium	1.09947	-0.150539	-0.545551	-0.699779	-0.811165	-0.265566	0.684819	0.548825	3.41313	-0.568089	0.336298	0.776994	-0.51995	-0.811165	-0.0232262	-0.811165	-0.811165	-0.109606	-0.732562
Z-score	Lachnospira sp. 2789STDY5834967 / Clostridiales bacterium KLE1615 & 41_12_two_minus	0.194303	-0.743348	-0.208767	-0.718485	-1.04548	-0.290738	-1.16556	1.07217	-0.692387	2.07054	-1.04202	-0.0741497	-0.648633	0.949508	2.54572	0.226174	0.208149	0.00249518	-0.639493
Z-score	Eggerthella lenta	4.07453	-0.100337	-0.419575	-0.525438	-0.200834	0.239369	-0.434801	-0.0874912	0.364877	0.12991	-0.414048	-0.232389	-0.47471	-0.498597	-0.298479	-0.531822	-0.493943	0.244901	-0.341125
Z-score	Fusobacterium necrophorum	-0.25004	-0.25004	-0.25004	-0.25004	-0.25004	-0.25004	-0.25004	-0.25004	-0.25004	-0.25004	0.0154723	-0.25004	-0.25004	4.2352	-0.25004	-0.25004	-0.25004	-0.25004	-0.25004
Z-score	Eubacteriaceae bacterium CHKCI004 & Eubacterium sp. An3	2.46591	-0.398039	-0.460722	-0.460722	-0.460722	-0.460722	-0.460722	-0.460722	2.68906	-0.460722	-0.460722	-0.460722	-0.460722	-0.460722	-0.460722	-0.460722	-0.460722	1.59647	0.0966997
Z-score	Clostridium sp. CAG:1013	-0.0915525	-0.142435	4.23606	-0.266962	-0.266962	-0.266962	-0.266962	-0.266962	-0.180106	-0.266962	-0.266962	-0.266962	-0.266962	-0.266962	-0.23261	-0.266962	-0.266962	-0.266962	-0.118849
Z-score	Clostridium sp. CAG:269	-0.304252	0.221998	0.691933	0.0815578	-1.27671	1.98729	0.453431	-0.60068	-0.792947	-0.710766	-0.654669	-1.06318	0.466191	2.64437	0.859983	-0.619176	-1.06559	-0.0733502	-0.245434
Z-score	Firmicutes bacterium CAG:212 / Clostridium sp. 2789STDY5834871	-0.111714	-0.368152	-0.682694	0.741901	-0.787184	-0.365332	-0.476479	-0.724745	-0.394507	-0.416433	-0.0198795	-0.2488	2.4644	0.0520801	-0.449909	-0.137432	3.00774	-0.475708	-0.607153
Z-score	Clostridium sp. CAG:632	-0.638646	-0.511333	0.183768	2.43552	-0.653752	-0.653752	0.0125847	-0.576405	-0.653752	-0.653752	1.90307	1.15105	1.86633	-0.653752	-0.653752	-0.171606	-0.569084	-0.649655	-0.513078
Z-score	Eggerthella sp. CAG:298	2.13381	-0.395106	-0.397256	-0.73735	-0.818682	0.0309817	-0.794375	0.541169	-0.321381	0.167508	-0.424846	-0.177587	-0.795261	-0.563535	0.934592	-0.818682	-0.413261	2.99421	-0.144946
Z-score	Methanobrevibacter smithii 1	0.202329	-0.650234	-0.585676	-0.352813	-0.752038	1.16629	-0.611353	-0.528889	-0.704325	-0.706933	0.344155	-0.738969	-0.287642	2.31386	1.41171	-0.486822	-0.693795	2.29711	-0.635971
Z-score	Clostridium sp. CAG:343	0.162548	-0.305814	0.0824942	-0.557191	-0.835389	2.74712	-0.692938	-0.495672	-0.457663	-0.32149	-0.412038	-0.733145	0.0544251	-0.315522	2.68885	0.512874	-0.78933	0.220353	-0.552474
Z-score	Phascolarctobacterium sp. CAG:266	-0.426909	0.0514441	1.45044	-0.635752	-0.635752	-0.17163	-0.62792	0.655148	0.187427	-0.635752	-0.465987	-0.635263	-0.635752	3.53684	0.435607	-0.635752	-0.635752	0.0904295	-0.265114
Z-score	Cryptobacterium sp. CAG:338	0.644053	-0.4273	-0.624588	-0.600436	-0.694486	2.51863	-0.679816	1.41799	-0.42755	-0.0456444	-0.456785	-0.694486	-0.694486	2.33149	0.529245	-0.694486	-0.592143	-0.160745	-0.648445
Z-score	Prevotella sp. CAG:1092	-0.582662	-0.578204	-0.577802	0.878692	-0.603283	-0.603283	-0.451607	-0.555246	-0.468428	0.127069	0.718311	1.04771	1.42836	-0.603283	-0.603283	3.20982	-0.603283	-0.597043	-0.582557
Z-score	Weissella cibaria	-0.329741	-0.25684	-0.332437	-0.232889	-0.339523	-0.32183	4.11236	-0.336361	-0.332789	-0.330566	-0.0899306	-0.271626	0.779645	-0.207521	-0.22789	-0.339523	-0.289294	-0.329241	-0.324
Z-score	Anaerofustis stercorihominis	-0.233582	-0.159259	-0.358799	-0.385677	-0.423379	0.140491	-0.205522	-0.196601	0.401676	-0.423379	-0.423379	-0.381761	-0.423379	-0.423379	4.1154	-0.423379	-0.423379	0.207894	0.0193918
Z-score	Streptococcus infantis	0.353412	0.280182	-0.544919	-0.48041	-0.629885	0.422623	-0.21867	0.0827317	3.98057	0.050664	-0.171265	0.0616253	-0.529746	-0.629885	-0.407043	-0.629885	-0.629885	-0.348583	-0.0116313
Z-score	Selenomonas artemidis	-0.351992	-0.0691055	-0.351992	-0.351992	-0.351992	-0.351992	-0.351992	-0.351992	2.23312	3.46786	-0.351992	-0.351992	-0.351992	-0.351992	-0.351992	-0.351992	-0.351992	-0.351992	-0.351992
Z-score	Dorea sp. CAG:105	3.31047	-0.57669	-0.562059	-0.642054	-0.855458	0.904356	-0.818899	-0.0948428	-0.632656	0.38149	-0.293955	-0.730942	-0.303387	1.43896	0.786151	-0.00151592	-0.474545	-0.0778739	-0.756553
Z-score	Bacteroidales bacterium H4 & Prevotella sp. CAG:873	-0.566751	-0.566453	-0.155554	-0.0178726	-0.566751	-0.283679	-0.543437	-0.196871	-0.418212	-0.566751	-0.549401	2.31984	1.58494	-0.566751	-0.437049	2.79298	-0.496266	-0.219564	-0.546396
Z-score	Fusobacterium nucleatum subsp. animalis	-0.391314	-0.298336	2.12095	-0.396199	-0.397886	-0.393469	-0.392098	-0.370764	-0.127212	-0.378639	-0.388603	-0.381515	-0.367919	-0.091784	-0.397886	-0.112545	-0.397886	3.52658	-0.363482
Z-score	Bacteroidales bacterium H2 / Prevotella sp. CAG:251	0.596665	1.14557	-0.227101	-0.609901	-0.625294	-0.609078	-0.582925	3.26085	0.756775	-0.625294	-0.625294	-0.625294	-0.625294	-0.625294	0.566095	-0.625294	-0.592858	-0.486961	1.15992
Z-score	Prevotella buccae	-0.451758	0.607602	3.41987	-0.451758	-0.451758	-0.451758	-0.419879	-0.449471	-0.424187	-0.451758	0.0714959	-0.375551	-0.451758	-0.451758	-0.293884	-0.451758	-0.451758	-0.140899	2.07073
Z-score	Turicimonas muris	-0.427967	0.780866	-0.401464	-0.415116	-0.427967	0.270298	3.91279	-0.427967	-0.0167595	-0.427967	-0.416814	-0.341451	-0.427967	-0.427967	-0.427967	-0.427967	-0.427967	-0.317027	0.796376
Z-score	Intestinibacter bartlettii	2.84876	-0.338397	-0.53318	-0.766263	-0.725134	0.327541	-0.86027	-0.129421	-0.641717	0.636436	1.39948	-0.947463	-0.425622	-0.419067	1.73444	-0.81956	0.0166673	0.427523	-0.784752
Z-score	Coprobacillus sp. 8_1_38FAA / Clostridium sp. 2789STDY5608874	3.53371	-0.268793	-0.0373009	-0.422116	-0.724826	0.22986	-0.721239	-0.35268	-0.438094	-0.503713	-0.379672	-0.72085	1.54929	0.177455	0.558576	-0.573049	-0.715908	0.308393	-0.499046
Z-score	Firmicutes bacterium CAG:646	-0.362737	0.270496	0.124424	-0.45616	-0.45616	-0.425942	-0.45616	-0.45616	3.1852	-0.45616	-0.45616	-0.144762	-0.45616	-0.45616	-0.45616	-0.45616	-0.45616	-0.105194	2.47627
Z-score	Citrobacter freundii	-0.126715	-0.0849626	-0.363765	1.47825	-0.469865	-0.198071	-0.435676	3.84262	-0.308958	-0.275678	-0.24335	-0.436632	-0.469865	-0.464432	-0.340052	-0.462443	-0.2935	0.0611163	-0.408018
Z-score	Bifidobacterium breve	2.49482	-0.163353	-0.523439	-0.516681	-0.503987	-0.436358	-0.129425	-0.49805	0.903777	0.547018	-0.517028	2.88448	-0.454215	-0.515545	-0.516275	-0.52349	-0.520827	-0.507756	-0.503669
Z-score	Eubacterium sp. CAG:161	1.88134	-0.483021	0.0468977	-0.778063	-0.841344	2.20057	-0.492961	-0.501639	-0.645858	1.09783	-0.780394	-0.680428	-0.636647	0.655877	0.254344	-0.832661	-0.841344	1.83552	-0.458019
Z-score	Klebsiella michiganensis 1	1.24398	1.29714e-05	-0.235295	-0.111996	-0.425381	-0.264746	-0.39199	-0.420162	-0.0222792	-0.299125	-0.162124	-0.412619	-0.425381	-0.425381	-0.395868	-0.425381	-0.390897	3.94	-0.375366
Z-score	Bacteroidales bacterium 55_9	-0.376321	0.0626238	0.689836	-0.592506	-0.750403	1.76106	-0.750403	3.05564	0.46636	0.796704	-0.707599	-0.749215	-0.317321	-0.750403	-0.278595	-0.750403	-0.750403	0.553541	-0.612194
Z-score	Alistipes sp. Marseille-P2431	-0.499412	3.01482	0.61833	-0.630696	-0.630696	-0.476314	-0.488787	-0.630696	1.3508	-0.630696	-0.630696	-0.245919	-0.630696	-0.630696	-0.314931	-0.630696	-0.28728	0.576509	1.79776
Z-score	Faecalibacterium prausnitzii 6	-0.267567	-1.07153	0.0952158	-0.283397	1.51067	-0.50485	-0.517202	-0.0265804	-0.697019	0.196537	-0.659228	2.30152	-0.624388	-0.768206	-0.198428	-0.780019	2.54002	-0.632654	0.387098
Z-score	Proteobacteria bacterium CAG:495	-0.4621	-0.386753	0.996877	-0.508009	-0.51016	0.327964	-0.504475	0.763587	-0.391462	-0.145942	-0.51016	-0.397213	-0.51016	-0.51016	0.182373	-0.51016	-0.51016	-0.217253	3.80336
Z-score	Clostridium sp. CAG:452	-0.503138	-0.654448	1.20628	0.733521	-0.92831	0.274862	-0.779064	-0.757376	-0.82539	-0.374573	-0.211479	-0.571867	3.0741	1.34715	-0.290836	-0.0907467	-0.92831	0.754477	-0.474853
Z-score	Bacteroides sp. 43_108	-0.51224	3.35987	1.63908	-0.51224	-0.51224	-0.0478106	-0.51224	-0.126259	-0.51224	-0.51224	-0.377681	-0.51224	-0.51224	-0.51224	-0.51224	-0.51224	-0.51224	0.481957	1.21771
Z-score	Clostridia bacterium UC5.1-2E3	1.32884	-0.621948	0.939528	-0.821012	-0.476564	0.0680219	0.098312	-0.206005	2.80838	-0.744037	-0.821012	-0.821012	-0.821012	0.687491	-0.21335	-0.821012	-0.821012	1.60008	-0.342676
Z-score	Holdemanella biformis	-0.00319815	-0.317157	-0.319981	0.223336	-0.700061	-0.0335735	-0.540846	-0.373886	-0.369807	-0.0240489	0.523315	-0.317172	0.455113	-0.64142	-0.309241	-0.298294	4.00441	-0.392284	-0.565208
Z-score	Firmicutes bacterium CAG:103	0.710009	0.673356	0.0624519	-0.516702	-0.884542	-0.55303	-0.209493	0.523166	-0.381016	-0.0189377	-0.827058	3.43746	-0.721029	-0.67834	0.483854	-0.863255	-0.745403	0.987664	-0.479158
Z-score	Ruminococcus sp. 2789STDY5608817 / Eubacterium sp. 2789STDY5834872	2.56507	-0.738719	-0.631858	-0.71992	-1.16599	1.09218	-1.05762	0.77403	-0.588626	-0.157598	1.70714	-0.88512	-0.430206	0.449318	1.12984	-0.525033	-0.0065137	0.0134558	-0.82383
Z-score	Succinatimonas sp. CAG:777	-0.464737	-0.433265	-0.416748	1.50854	-0.464737	-0.347203	-0.0980225	-0.460357	-0.455869	-0.464471	3.7274	-0.325259	0.563233	-0.464737	-0.464737	-0.00781316	-0.0186244	-0.454792	-0.457803
Z-score	Caecibacter massiliensis	-0.520919	-0.506236	0.360674	1.08407	-0.759536	1.36391	-0.663879	0.647049	2.46962	-0.759536	-0.667234	1.60387	0.873654	-0.759536	-0.759536	-0.759536	-0.759536	-0.749732	-0.737621
Z-score	bacterium OL-1	-0.315306	0.208389	-0.478322	4.01741	-0.495807	0.0293006	0.29751	-0.229448	-0.275466	-0.495807	-0.493048	-0.0948987	-0.495807	-0.495807	0.529534	-0.495807	-0.495807	0.235326	-0.456138
Z-score	Coprococcus sp. CAG:782	-0.170811	0.11561	0.141718	1.49765	-0.640462	-0.546578	-0.420879	-0.640462	-0.640462	-0.640462	3.54727	0.331765	0.725379	-0.640462	-0.318253	-0.52662	-0.473572	-0.126563	-0.573813
Z-score	Turicibacter sanguinis 1	2.74742	-0.577642	-0.429306	-0.558155	-0.122604	-0.0734522	-0.69953	-0.537135	0.275261	-0.538428	2.48233	-0.702854	-0.491303	-0.489859	1.18675	-0.688845	-0.395634	0.1279	-0.514917
Z-score	Eubacterium sp. 2789STDY5834909	3.98374	-0.349231	-0.460671	-0.0835144	-0.509152	-0.44382	-0.509152	0.360481	-0.384695	-0.381603	-0.0926183	-0.509152	0.86104	-0.509152	-0.0174736	-0.159845	0.042005	-0.458411	-0.378775
Z-score	Sutterella sp. CAG:521	-0.44389	1.1325	-0.0343693	-0.635135	-0.635135	-0.47355	-0.298232	-0.11368	3.53765	-0.635135	1.12094	-0.635135	-0.635135	-0.635135	0.0550787	-0.635135	-0.635135	0.37747	0.221157
Z-score	Slackia exigua	0.142012	0.495602	-0.220131	-0.351297	-0.351297	-0.351297	-0.351297	-0.351297	4.13126	-0.351297	-0.351297	-0.351297	-0.351297	-0.351297	-0.351297	-0.351297	-0.351297	0.0926413	-0.074518
Z-score	Bacteroidales bacterium H1 & K10	-0.315938	-0.315938	1.4777	-0.315938	-0.315938	-0.312449	-0.315938	3.88875	-0.31493	-0.315938	-0.315938	-0.315938	-0.315938	-0.315938	-0.315938	-0.315938	-0.315938	-0.315938	-0.315938
Z-score	Prevotella sp. CAG:617	-0.39072	0.504169	4.10508	-0.39072	-0.39072	-0.0739183	-0.39072	-0.0743617	0.299568	-0.39072	-0.331588	-0.39072	-0.39072	-0.39072	-0.380113	-0.39072	-0.39072	-0.104853	-0.0367837
Z-score	Ruminococcus sp. CAG:382	-0.790848	-0.851012	0.322052	0.305562	-0.963255	0.146548	0.272776	-0.963255	-0.955566	-0.369045	-0.111906	1.17972	1.50678	-0.947468	0.15623	2.90676	-0.756707	0.60049	-0.687859
Z-score	Prevotella sp. UBA630	-0.488783	-0.301889	0.13787	1.31528	-0.529376	-0.529185	-0.484433	-0.529376	0.647999	-0.529376	-0.346808	-0.170559	0.791198	-0.529376	-0.529376	3.60897	-0.529376	-0.474021	-0.529376
Z-score	Lactobacillus amylovorus	2.27069	-0.357243	-0.360035	-0.305863	-0.360035	-0.360035	-0.354186	-0.360035	-0.0654904	-0.360035	-0.346218	-0.360035	-0.349794	3.44146	-0.360035	-0.360035	-0.360035	-0.333018	-0.360035
Z-score	Acidaminococcus fermentans	-0.497562	-0.497816	-0.119502	3.49446	-0.504277	1.51965	-0.496088	-0.361508	1.03992	-0.500763	-0.502223	0.567682	-0.496816	-0.473682	-0.358402	-0.504277	-0.504277	-0.39758	-0.40695
Z-score	Clostridium sp. CAG:221	0.603478	-0.600403	-0.430732	-0.155194	-0.724625	-0.491513	-0.400107	-0.591994	-0.737513	0.180456	3.48485	-0.795634	0.960815	-0.6428	1.21572	-0.173415	0.148848	-0.103556	-0.746682
Z-score	Faecalitalea cylindroides	1.87886	-0.561629	-0.0449518	-0.711468	-0.712083	2.34536	-0.712083	-0.503519	0.439008	-0.602426	-0.712083	-0.712083	-0.712083	0.340276	2.09401	-0.712083	-0.712083	0.500413	-0.189353
Z-score	Megasphaera sp. ASD88 & An286	-0.369098	0.28638	0.8145	-0.369098	-0.369098	0.146175	-0.369098	4.04234	-0.222044	-0.369098	-0.369098	-0.369098	-0.369098	-0.369098	-0.369098	-0.369098	-0.369098	-0.269078	-0.369098
Z-score	Ruminococcus sp. CAG:563	-0.308693	-0.297891	-0.191124	-0.170588	-0.308693	-0.308693	-0.209172	-0.308693	-0.308693	-0.308693	-0.219349	-0.219024	4.16929	-0.308693	-0.308693	0.527511	-0.308693	-0.307252	-0.30416
Z-score	Firmicutes bacterium CAG:341	-0.719935	0.777961	0.0210702	0.220784	-1.08587	2.44219	-0.926225	-0.0821364	-0.597759	0.0778551	0.832122	-0.930656	-0.701299	-1.08587	1.52952	-1.07177	-0.127491	1.63656	-0.209039
Z-score	Bacteroides sp. CAG:927	-0.454056	-0.453503	-0.0586496	-0.335695	-0.454056	-0.0319757	0.386769	3.88075	-0.454056	-0.454056	-0.454056	-0.454056	-0.454056	-0.454056	-0.116163	-0.454056	1.177	-0.452616	0.0905891
Z-score	Rikenella microfusus	-0.375655	-0.375655	0.0965815	-0.375655	-0.375655	-0.375655	-0.375655	0.102115	3.74434	-0.375655	-0.375655	-0.375655	-0.375655	-0.375655	-0.375655	-0.375655	-0.375655	1.68725	-0.371107
Z-score	Lactobacillus salivarius	1.17313	0.661153	-0.663906	-0.690619	-0.706434	-0.0954659	-0.421323	1.34608	3.20023	0.531085	0.31511	-0.611009	-0.697643	-0.706434	-0.663681	-0.706434	0.0343512	-0.594074	-0.704119
Z-score	Clostridium citroniae	-0.232447	0.406005	-0.228115	-0.684555	3.85602	-0.216118	0.717541	0.0968139	0.722784	-0.409474	-0.6988	-0.305691	-0.676995	-0.379837	-0.252339	-0.719704	-0.195436	-0.342391	-0.457264
Z-score	Selenomonas bovis	-0.3167	-0.3167	-0.315019	4.13988	-0.3167	-0.176249	0.489172	-0.3167	-0.3167	-0.3167	-0.3167	-0.3167	0.296016	-0.3167	-0.3167	-0.3167	-0.3167	-0.3167	-0.3167
Z-score	Aggregatibacter segnis	-0.425644	0.830667	-0.334268	-0.0594173	-0.425644	-0.425644	-0.425644	-0.360658	-0.059162	-0.227886	3.948	0.753618	-0.425644	-0.425644	-0.425644	-0.425644	-0.425644	-0.385344	-0.274755
Z-score	Clostridium sp. CAG:1024	-0.41644	-0.401177	0.130163	-0.393215	-0.416743	-0.416743	-0.416743	-0.416743	-0.416743	-0.416743	-0.213273	-0.414818	4.01245	-0.416743	0.648779	0.379582	-0.416743	0.334407	-0.332506
Z-score	Blautia sp. Marseille-P3087 / Ruminococcus sp. 2789STDY5608882	3.16967	-0.574884	-0.691636	-0.487371	-0.955209	0.723281	-0.943847	0.754569	-0.546597	0.174408	0.585107	-0.933343	-0.464065	-0.214283	1.36689	-0.613966	0.515769	-0.0309291	-0.833554
Z-score	Prevotella sp. CAG:755	-0.400577	-0.432111	3.0421	-0.437886	-0.437886	-0.437886	-0.437886	1.09875	-0.384223	-0.437886	-0.437886	-0.437886	-0.437886	-0.437886	-0.064809	-0.437886	-0.437886	2.39551	-0.437886
Z-score	Roseburia sp. CAG:471	1.62196	-0.856437	-0.979108	0.0266921	-1.25022	0.892701	-1.21014	-0.581345	-0.896225	0.499852	1.39847	-0.203151	0.907839	-1.23716	0.915206	1.15985	1.29606	-0.513348	-0.991505
Z-score	Firmicutes bacterium CAG:555	-0.442918	-0.538564	0.463316	-0.463403	-0.541503	-0.541503	-0.51145	-0.482205	-0.539267	-0.356329	-0.458331	-0.541503	0.775427	-0.541503	1.99307	3.24151	-0.541503	0.468784	-0.442136
Z-score	Bacteroides sp. An322	-0.235702	-0.235702	4.24264	-0.235702	-0.235702	-0.235702	-0.235702	-0.235702	-0.235702	-0.235702	-0.235702	-0.235702	-0.235702	-0.235702	-0.235702	-0.235702	-0.235702	-0.235702	-0.235702
Z-score	Prevotella timonensis	-0.448599	-0.279431	-0.453782	-0.402849	-0.505134	-0.494746	-0.254152	-0.431046	-0.0740669	-0.445033	0.114941	-0.362964	-0.108207	0.131385	-0.468055	4.05673	-0.327594	0.657387	0.0952166
Z-score	Streptococcus parasanguinis	2.44311	-0.242706	-0.460027	-0.582839	-0.736218	0.363881	-0.577365	0.206376	3.01688	-0.0354402	-0.71947	0.298436	-0.544922	-0.191732	-0.150935	-0.685629	-0.743542	-0.148252	-0.509606
Z-score	Acidaminococcus sp. CAG:542	-0.585242	0.179744	-0.197637	0.548204	-0.585242	2.04857	1.96657	-0.585242	-0.108252	-0.585242	-0.582409	2.54685	-0.585242	-0.585242	-0.585242	-0.585242	-0.585242	-0.549213	-0.585242
Z-score	Firmicutes bacterium CAG:460	-0.725782	-0.727494	1.75881	-0.357173	-0.732564	3.08841	0.359142	-0.726445	-0.730102	0.333452	-0.592037	-0.723214	0.438871	-0.247365	0.379765	-0.656825	-0.732564	0.979044	-0.385937
Z-score	Ruminococcus sp. CAG:624	-0.526964	0.109177	-0.287602	-0.526964	-0.526964	-0.526964	-0.28798	-0.526964	0.544432	-0.526964	-0.526964	-0.526964	0.777177	-0.526964	0.205549	3.74352	-0.526964	0.932916	-0.467544
Z-score	Citrobacter werkmanii	-0.339158	1.98983	3.62882	-0.339158	-0.339158	-0.339158	-0.339158	-0.339158	-0.212385	-0.339158	-0.339158	-0.339158	-0.339158	-0.339158	-0.339158	-0.339158	-0.339158	-0.339158	-0.318895
Z-score	Clostridium sp. 28_12 & CAG:356	2.98776	0.0042331	1.22188	-0.761854	-0.824486	1.14483	-0.386761	-0.673049	-0.386439	-0.293194	-0.744613	-0.43876	-0.723835	0.80494	-0.392243	-0.721525	-0.720344	1.36039	-0.456922
Z-score	Clostridium sp. 29_15 & CAG:265	0.527813	-0.306418	-0.498057	-0.447859	-0.736214	0.713369	-0.67281	-0.484751	-0.698116	-0.468067	3.69366	-0.674382	0.993692	-0.168551	-0.245077	0.0390482	0.249019	-0.122367	-0.693933
Z-score	Clostridium sp. CAG:678	-0.447883	-0.447883	-0.0085662	-0.447883	-0.447883	-0.447883	-0.447883	1.01835	-0.276475	1.45395	-0.447883	-0.447883	-0.447883	3.62948	-0.44393	-0.447883	-0.447883	-0.0037488	-0.442351
Z-score	Oscillibacter sp. ER4 / Firmicutes bacterium CAG:129_59_24	-0.303866	0.315094	0.110926	-0.651304	-0.743897	-0.678145	0.0279683	-0.0951064	-0.641776	0.19337	-1.08475	3.84448	0.134045	-0.789612	-0.151257	0.191798	0.31213	-0.263568	0.273471
Z-score	Butyricicoccus sp. N15.MGS-46 & N54.MGS-46 & K4410.MGS-46	3.69379	0.21177	-0.688685	-0.824362	-0.256344	-0.101012	-0.537994	0.458961	0.748713	-0.089928	-0.772605	-0.311095	-0.107216	-1.05919	0.536353	0.329299	-0.310146	-0.0929124	-0.827393
Z-score	Clostridiales bacterium UBA644	-0.562196	-0.413519	1.38343	1.96668	-0.562196	-0.523311	-0.562196	1.06366	-0.537059	-0.0711986	-0.562196	-0.513491	-0.562196	-0.240462	2.87362	-0.562196	-0.562196	-0.490775	-0.562196
Z-score	Clostridiales bacterium 1_7_47FAA & VE202-28	-0.96647	1.00155	0.558088	-0.983717	-1.02498	0.587985	2.5762	0.87556	-0.525284	-0.975257	-1.02498	-0.620149	-1.02498	1.23151	0.517863	-1.02498	0.445807	-0.100173	0.476409
Z-score	Prevotella sp. CAG:1058	-0.383763	-0.342851	0.347769	-0.383763	-0.383763	-0.383763	-0.383763	3.49288	2.10843	-0.383763	-0.383763	-0.383763	-0.383763	-0.383763	-0.383763	-0.383763	-0.383763	-0.381898	-0.235407
Z-score	Firmicutes bacterium CAG:129	-0.700052	-0.610404	-0.211651	-0.117927	-0.717589	-0.420308	0.228336	-0.285255	-0.840058	-0.50937	-0.327863	3.32409	1.85324	-0.768735	-0.00743541	0.61711	-0.81016	0.257903	0.0461304
Z-score	Clostridium sp. CAG:417	3.26557	1.33763	-0.303955	-0.1272	-0.847847	0.94189	0.242155	-0.638363	-0.758924	0.219346	-0.745388	-0.6667	-0.537607	-0.847847	0.386343	-0.847847	-0.75127	0.52754	0.152476
Z-score	Candidatus Gastranaerophilales bacterium MH_37 & HUM_20 / Melainabacteria sp. 35_41	-0.363096	-0.363096	4.01805	-0.363096	-0.363096	0.391403	-0.363096	-0.19083	-0.363096	-0.363096	-0.363096	-0.363096	-0.363096	-0.363096	-0.15656	-0.363096	-0.363096	-0.266996	0.925174
Z-score	Collinsella tanakaei	-0.514139	2.09837	-0.474463	-0.525954	-0.528318	3.18394	-0.528318	-0.0160248	0.0362823	-0.321055	-0.528318	-0.528318	-0.510623	-0.528318	-0.528318	-0.528318	-0.480693	1.05607	0.166513
Z-score	Prevotella sp. CAG:1185	-0.411646	0.0927914	3.23401	-0.411646	-0.411646	2.41134	-0.411646	-0.411646	-0.411646	-0.411646	-0.411646	-0.411646	-0.411646	-0.411646	-0.403087	-0.411646	-0.411646	0.42799	-0.411646
Z-score	Clostridium perfringens	-0.449766	-0.288715	-0.627482	-0.476056	0.00984454	-0.467296	-0.539509	-0.644495	1.27641	0.544747	2.8072	-0.517999	-0.689423	-0.700686	-0.537323	-0.649601	0.413672	-0.657587	2.19406
Z-score	Eggerthella sp. 51_9 & CAG:209	2.8323	-0.65231	-0.212504	-0.604493	-0.658007	0.681134	-0.565206	0.473827	-0.578559	-0.576897	0.2528	-0.456545	-0.546996	0.00321604	2.51778	-0.652809	-0.630652	-0.0861935	-0.539889
Z-score	Sutterella parvirubra	-0.353358	0.675841	-0.353358	-0.341393	-0.353358	-0.353358	-0.326832	0.169185	4.10383	-0.353358	-0.0072284	-0.323957	-0.353358	-0.353358	-0.353358	-0.353358	-0.130819	-0.327793	-0.310611
Z-score	Bacteroidales bacterium H3	-0.195652	-0.24652	-0.269859	-0.336402	-0.353273	-0.292127	-0.322153	3.99462	-0.297868	-0.353273	-0.353273	-0.353273	-0.353273	-0.353273	-0.119268	-0.353273	-0.270239	-0.352665	1.18104
Z-score	Clostridium sp. CAG:288	-0.25822	-0.259668	4.2383	-0.261138	-0.261138	-0.188536	-0.246855	-0.237	-0.257319	-0.259623	-0.251005	-0.254834	-0.261138	-0.261138	-0.0744151	-0.258706	-0.261138	-0.178905	-0.207523
Z-score	[Staphylococcus] sp. CAG:324	-0.43455	-0.416842	0.779322	-0.452254	-0.452495	0.52362	-0.452495	-0.377277	-0.42028	-0.0410019	-0.452495	-0.452495	-0.452495	3.95207	-0.236375	-0.452495	-0.452495	-0.054913	0.345947
Z-score	Lachnoclostridium sp. An138	-0.424345	-0.586938	0.538059	-0.86727	-0.0299243	0.685382	-0.86727	2.77863	1.77053	-0.0185272	-0.86727	-0.808442	-0.86727	1.20943	0.253744	-0.86727	-0.86727	-0.357933	0.193957
Z-score	Clostridium sp. CAG:302	1.19247	0.732003	0.414034	-0.773884	-1.06758	0.352968	0.0444686	-0.861135	-0.746637	-1.01787	-1.02379	-0.858579	1.8775	1.37443	-0.00328691	-0.493914	-1.05839	2.02376	-0.106579
Z-score	Candidatus Gastranaerophilales bacterium HUM_2 / Candidatus Melainabacteria bacterium MEL.A1	-0.436971	-0.303274	-0.0742279	1.36104	-0.44553	-0.405988	0.279008	-0.44553	-0.44553	-0.44553	3.85385	-0.102538	-0.0162548	-0.44553	-0.44553	-0.389103	-0.28001	-0.443714	-0.368632
Z-score	Firmicutes bacterium CAG:313	-0.766855	-0.684244	3.03574	1.07001	-0.797866	-0.00169408	0.418742	-0.792805	-0.781716	-0.795536	0.8022	-0.31179	-0.483017	1.59375	0.448769	-0.676245	-0.736046	-0.133676	-0.407724
Z-score	Ruminococcus sp. CAG:724	-0.568543	-0.435909	0.135089	1.56561	-0.568543	-0.532162	0.0730603	-0.568543	-0.568543	-0.568543	-0.285008	3.41934	-0.313241	-0.325136	-0.568543	1.27964	-0.278519	-0.338013	-0.553496
Z-score	Clostridium sp. CAG:967	-0.294902	-0.356962	3.9961	-0.356962	-0.356962	-0.342225	-0.356962	-0.290735	-0.356962	-0.356962	-0.356962	-0.356962	-0.356962	-0.356962	1.00844	-0.356962	-0.356962	0.399393	-0.192519
Z-score	Firmicutes bacterium CAG:791	-0.489035	-0.477497	-0.445409	1.42461	-0.489035	-0.47758	-0.453829	-0.489035	-0.485082	-0.489035	0.585283	0.357477	3.58174	-0.489035	-0.428095	0.707803	-0.489035	-0.469703	-0.485513
Z-score	Massiliomicrobiota sp. An80 & An105 & An134 & An142	1.44683	-0.449314	0.0242289	-0.610951	-0.610951	0.754183	-0.610951	-0.277663	3.53628	-0.577677	-0.610951	-0.610951	-0.610951	-0.139655	0.448429	-0.610951	-0.610951	0.00981383	0.112161
Z-score	Faecalicoccus pleomorphus	-0.56916	0.303007	1.15873	-0.803451	-0.803451	2.35204	-0.777935	0.349742	1.85093	-0.362352	-0.705251	-0.556643	-0.803451	-0.803451	1.71548	-0.803451	-0.659325	-0.107717	0.0257082
Z-score	Streptococcus pasteurianus	-0.282992	-0.242843	-0.283245	-0.179959	-0.283368	-0.0360661	-0.187988	-0.282667	0.0931742	-0.283368	4.22232	-0.281938	-0.279047	-0.283368	-0.283243	-0.283368	-0.283368	-0.283247	-0.275419
Z-score	Streptococcus thermophilus	1.6093	-0.569215	-0.558882	-0.619712	-0.412112	3.32352	-0.612659	0.88396	-0.103451	0.175437	-0.58771	-0.582792	-0.613359	-0.204503	0.881721	-0.620862	-0.589183	-0.252695	-0.546797
Z-score	Clostridiales bacterium 41_21_two_genomes	3.49525	-0.706544	-0.25844	-0.349026	-0.858497	0.824123	-0.294729	-0.455119	-0.819119	0.565259	0.938032	-0.823734	0.0399111	-0.858497	0.130131	-0.703651	0.399502	0.309683	-0.57454
Z-score	Candidatus Gastranaerophilales bacterium HUM_6 & HUM_7 & HUM_12 & HUM_14	-0.565098	-0.344719	-0.225527	3.67275	-0.566743	-0.549005	1.05706	-0.566743	-0.564711	0.135835	0.766254	-0.446761	-0.0151123	-0.566743	-0.559355	-0.464773	0.740018	-0.474012	-0.462613
Z-score	Clostridium sp. CAG:964	0.400157	-0.515953	-0.0512157	0.0920037	-0.515953	0.783795	-0.470876	3.94366	-0.513637	-0.515953	-0.188573	-0.515953	0.304154	-0.515953	-0.515953	-0.137718	-0.515953	-0.189526	-0.360556
Z-score	Weissella confusa	-0.47839	-0.363687	-0.240353	3.32331	-0.47839	-0.477212	1.09328	-0.47839	-0.473426	-0.425717	0.154895	-0.403219	1.9554	-0.47839	-0.47839	-0.47839	-0.328755	-0.478107	-0.466073
Z-score	Campylobacter concisus 2	-0.387529	0.0795777	-0.375023	-0.479561	-0.546806	-0.546806	0.050422	-0.546806	3.58678	-0.396317	0.412753	0.862804	-0.389937	-0.546806	-0.546806	-0.546806	-0.546806	-0.546806	1.41048
Z-score	Clostridium sp. CAG:440	2.16443	0.781347	0.14913	-0.610731	-0.760856	-0.14875	-0.743378	-0.614037	-0.151992	-0.752224	-0.65952	-0.60185	-0.523694	2.60224	0.0482487	-0.760856	-0.760856	1.47303	-0.129688
Z-score	Eubacterium dolichum	-0.28856	0.996027	-0.143153	-0.75881	-0.75881	0.550851	-0.75881	-0.251954	2.57607	-0.570329	-0.75881	-0.596305	-0.75881	-0.75881	0.550346	-0.75881	-0.691429	1.1704	2.0097
Z-score	Granulicatella adiacens	2.18028	0.133834	-0.407487	-0.542974	-0.752784	1.80652	0.00172968	-0.651418	2.39389	-0.512856	0.820786	-0.446329	-0.752784	-0.752784	-0.6876	-0.752784	-0.127977	-0.4171	-0.532169
Z-score	Clostridium sp. CAG:349	-0.634749	-0.541418	-0.309227	0.60863	-0.674343	-0.155704	-0.636858	-0.415381	-0.582808	-0.360006	-0.0528887	1.36274	0.22423	-0.0164902	-0.165192	3.7021	-0.63422	-0.42237	-0.296047
Z-score	Clostridium sp. 28_17 & CAG:470	0.0626456	0.0352053	0.340982	1.71793	-1.00663	-0.99647	-0.776389	-0.93579	-1.00326	-0.79008	2.24392	-0.629802	-0.0035181	1.93497	0.503764	-0.334876	-1.00663	0.47891	0.165097
Z-score	Clostridium sp. CAG:433	0.0390961	-0.149894	0.146633	1.12512	-0.850158	-0.369673	1.61071	-0.601107	-0.801631	-0.793503	1.53995	-0.782114	2.68851	-0.677596	-0.378182	-0.71284	-0.838319	0.430654	-0.625653
Z-score	Enterobacter kobei	0.302167	-0.045453	3.95993	0.406889	-0.503058	-0.503058	-0.165848	-0.452137	-0.222789	-0.503058	0.752843	-0.481574	-0.472918	-0.503058	-0.503058	-0.478843	0.102862	-0.264404	-0.425436
Z-score	Lactobacillus agilis	-0.248777	-0.248777	-0.248777	4.23649	-0.248777	-0.248777	-0.00728023	-0.248777	-0.248777	-0.248777	-0.248777	-0.248777	-0.248777	-0.248777	-0.248777	-0.248777	-0.248777	-0.248777	-0.248777
Z-score	Lachnospiraceae bacterium 2_1_46FAA	-0.236094	3.95686	-0.354453	-0.354453	-0.354453	-0.354453	-0.354453	-0.354453	1.0523	-0.354453	-0.354453	-0.354453	-0.354453	-0.354453	-0.354453	-0.354453	-0.354453	-0.354453	0.543732
Z-score	Clostridium sp. CAG:567	0.786502	0.210836	1.20261	-0.454552	-0.755928	-0.160336	-0.390608	-0.593502	-0.166507	-0.755928	-0.632098	-0.351077	-0.612963	-0.750228	1.96432	-0.755928	-0.751289	2.91976	0.0469207
Z-score	Olsenella sp. Marseille-P2300	-0.593406	-0.477101	-0.307406	-0.569862	-0.593406	0.503802	-0.593406	1.98032	1.00214	3.14901	-0.593406	-0.218943	-0.593406	-0.593406	-0.0204791	-0.593406	-0.593406	0.270258	-0.564492
Z-score	Massiliomicrobiota timonensis	2.16592	-0.535715	0.154385	-0.619025	-0.66955	0.168933	-0.66955	-0.182093	0.509496	0.0534298	-0.66955	-0.66955	-0.66955	3.14601	0.0475381	-0.66955	-0.66955	0.226824	-0.448851
Z-score	Bifidobacterium gallinarum == saeculare	4.22023	0.0236931	-0.272374	-0.282787	-0.282787	0.0611682	-0.282787	-0.111276	-0.275381	-0.282787	-0.27547	-0.282787	-0.282787	-0.282787	-0.282787	-0.282787	-0.282787	-0.279192	-0.263526
Z-score	Haemophilus parainfluenzae	-0.855303	0.458859	-0.256067	-0.191724	-0.169265	-0.637609	0.18199	-0.632547	3.52276	-0.598192	1.65481	-0.335083	0.293592	-0.423654	-0.833459	-0.463229	-0.153062	-0.0446639	-0.518151
Z-score	Candidatus Gastranaerophilus phascolarctosicola	-0.235702	-0.235702	-0.235702	4.24264	-0.235702	-0.235702	-0.235702	-0.235702	-0.235702	-0.235702	-0.235702	-0.235702	-0.235702	-0.235702	-0.235702	-0.235702	-0.235702	-0.235702	-0.235702
Z-score	Clostridium spiroforme	1.76883	-0.642654	-0.152524	-0.892193	-0.219752	0.454791	-0.926262	-0.603617	0.196561	0.089378	-0.910894	-0.854407	-0.930729	0.958941	2.30129	-0.930729	-0.930729	1.4772	0.747496
Z-score	Veillonella atypica	-0.541582	0.334573	0.443233	-0.506558	-0.552505	-0.522282	0.257355	-0.504788	3.24104	-0.469216	-0.259471	-0.406906	-0.180556	2.21291	-0.585341	-0.653666	-0.540398	-0.398536	-0.367299
Z-score	Firmicutes bacterium CAG:449	-0.424059	-0.440819	4.01383	0.923743	-0.456648	-0.314716	-0.281508	-0.456648	-0.453715	-0.384597	0.0140341	-0.409818	0.264217	-0.268787	-0.296417	-0.333195	-0.0730393	-0.360075	-0.261781
Z-score	Leuconostoc mesenteroides	0.539201	-0.468835	-0.366036	-0.40794	-0.494523	3.41998	-0.494523	-0.338523	-0.494523	-0.344373	-0.494523	-0.338419	-0.494523	0.732444	1.88068	-0.494523	-0.494523	-0.450611	-0.395904
Z-score	Faecalibacterium prausnitzii 2	-0.589564	-0.25732	-0.701586	-0.409092	-1.13934	-0.512045	-0.873054	0.469856	-0.636952	-0.042086	0.553947	1.37152	2.65819	-0.939886	-0.364419	0.249141	2.01613	-0.754403	-0.0990347
Z-score	Acetobacter sp. CAG:977	-0.359233	-0.349738	1.74395	-0.359233	-0.359233	0.250883	-0.359233	-0.359233	-0.359233	-0.359233	-0.359233	3.72191	-0.359233	-0.359233	-0.359233	-0.359233	-0.359233	-0.359233	-0.337748
Z-score	Candidatus Methanomassiliicoccus intestinalis	-0.562086	-0.562086	1.8293	-0.562086	-0.562086	-0.562086	-0.562086	-0.562086	-0.551753	2.43492	-0.562086	-0.562086	-0.562086	-0.562086	2.01706	-0.562086	-0.562086	0.799644	0.777955
Z-score	Candidatus Gastranaerophilales bacterium HUM_1 / Clostridium sp. CAG:813	-0.568658	-0.0225594	-0.0876339	1.58343	-0.568658	-0.563274	-0.444948	-0.568658	-0.568658	-0.568658	2.91502	-0.461258	0.689755	-0.568658	-0.568658	-0.520626	1.92633	-0.4729	-0.560727
Z-score	butyrate-producing bacterium SS3/4 - Clostridium sp. CAG:81	-1.20905	1.03374	-0.0308426	-0.299018	2.43133	0.0532789	-0.472589	0.59634	1.65397	0.640793	-0.956962	0.977612	-1.11031	-0.671641	-0.535599	-0.88789	0.624976	-1.0401	-0.798029
Z-score	Oscillibacter sp. 57_20	-0.590566	0.00418546	-0.143091	-0.417549	-0.752415	-0.453212	-0.363334	-0.431767	-0.377442	-0.315437	-0.399819	3.98734	-0.339	-0.330606	-0.167863	0.640047	0.468252	-0.312403	0.294681
Z-score	Treponema succinifaciens	-0.379972	-0.379972	-0.370452	0.357605	-0.379972	-0.379972	-0.302729	-0.379972	-0.379972	-0.379972	0.483666	-0.379972	3.99375	-0.379972	-0.379972	0.767938	-0.379972	-0.378645	-0.371445
Z-score	Clostridium sp. 2789STDY5834924	-1.16614	0.538911	1.29489	0.158376	2.84587	-0.579673	0.947059	0.619129	0.0572838	0.197712	-0.497858	0.306976	-1.0079	-1.07067	-0.655971	-1.0246	0.663827	-1.0794	-0.547822
Z-score	Clostridium sp. CAG:465	-0.151841	-0.29147	-0.172223	-0.284193	-0.313333	-0.0185801	-0.301257	-0.313333	-0.301276	-0.313333	-0.0844168	-0.30915	0.0415256	4.21919	-0.256303	-0.309562	-0.312978	-0.247123	-0.280348
Z-score	Clostridium sp. CAG:768	-0.505305	0.726132	-0.166361	-0.505305	-0.505305	0.374799	3.27981	-0.494996	-0.249554	-0.363164	-0.496028	-0.505305	-0.505305	2.13672	-0.505305	-0.505305	-0.299181	-0.40669	-0.504357
Z-score	Bifidobacterium catenulatum	2.73031	-0.606742	-0.564458	-0.57766	-0.617333	0.303014	0.0116001	0.20043	-0.603349	1.73061	-0.617333	2.1091	-0.364841	-0.5134	-0.42048	-0.612629	-0.617333	-0.376442	-0.593058
Z-score	Bifidobacterium animalis	2.00259	-0.493273	-0.435347	-0.511104	-0.511104	2.96263	-0.505563	-0.360345	-0.0980856	-0.221087	-0.509347	-0.48656	-0.511104	-0.377027	-0.243414	-0.511104	-0.511104	1.76929	-0.448945
Z-score	Veillonella seminalis	-0.235702	-0.235702	-0.235702	-0.235702	-0.235702	-0.235702	4.24264	-0.235702	-0.235702	-0.235702	-0.235702	-0.235702	-0.235702	-0.235702	-0.235702	-0.235702	-0.235702	-0.235702	-0.235702
Z-score	Methanobrevibacter smithii 2	0.124222	-0.429513	-0.346321	-0.428928	-0.429513	0.0624505	-0.429513	-0.322233	-0.429513	-0.204802	-0.426749	-0.424249	3.93124	-0.420809	0.410196	-0.428838	-0.429513	1.04224	-0.419858
Z-score	Lactobacillus gasseri 2	3.56421	-0.378369	-0.410763	-0.424143	-0.429074	-0.254613	-0.0715601	0.0635725	-0.181019	-0.317464	-0.305159	-0.420787	-0.417255	-0.415688	-0.351178	-0.429074	-0.429074	2.031	-0.423562
Z-score	Bacteroides salanitronis	-0.301396	-0.301396	0.34983	-0.301396	-0.301396	0.267952	-0.301396	4.1681	-0.301396	-0.301396	-0.301396	-0.301396	-0.301396	-0.301396	-0.264944	-0.301396	-0.301396	-0.301396	-0.301396
Z-score	Peptostreptococcus anaerobius	-0.117226	0.0527889	-0.841624	0.342394	-0.913169	0.909151	-0.913169	0.197965	0.175632	0.534261	2.56958	-0.913169	-0.913169	-0.913169	0.584763	-0.913169	-0.913169	2.04698	-0.0624815
Z-score	Helicobacter winghamensis	-0.235702	-0.235702	-0.235702	-0.235702	-0.235702	-0.235702	-0.235702	-0.235702	-0.235702	-0.235702	-0.235702	-0.235702	-0.235702	-0.235702	-0.235702	-0.235702	-0.235702	4.24264	-0.235702
Z-score	Firmicutes bacterium CAG:536	0.0779711	0.425939	0.0502973	0.716455	-0.807303	1.71436	-0.807303	-0.768423	0.206778	-0.807303	-0.807303	0.402397	2.42219	-0.807303	1.77875	-0.807303	-0.807303	-0.580049	-0.795543
Z-score	Collinsella intestinalis	4.21158	0.00533212	-0.262711	-0.310355	-0.314139	-0.0386778	-0.2787	-0.312242	-0.154344	-0.285832	-0.314139	-0.310852	-0.310378	-0.314139	-0.313025	-0.314139	-0.314139	0.0844301	-0.153525
Z-score	Clostridium sp. 26_22	0.000298423	1.46561	1.40132	-0.0484774	-0.941108	0.195725	-0.903188	-0.455407	-0.59396	-0.720387	-0.273759	-0.888032	0.936521	-0.497075	0.379393	-0.808237	-0.863712	2.90699	-0.292519
Z-score	Sanguibacteroides justesenii == Gabonibacter massiliensis	-0.559236	-0.395931	0.504429	-0.522476	-0.589662	1.64838	-0.589662	-0.458733	-0.328567	-0.589662	-0.589662	0.0064285	-0.589662	3.56962	0.309644	-0.589662	-0.00259617	-0.0267532	-0.206229
Z-score	Agathobaculum desmolans	1.38063	-0.410229	-0.410229	-0.410229	-0.410229	-0.410229	-0.410229	1.63537	-0.410229	-0.410229	-0.410229	-0.410229	-0.410229	-0.410229	-0.410229	-0.410229	-0.410229	3.43598	-0.298547
Z-score	Firmicutes bacterium CAG:345	-0.257823	-0.256015	4.24086	-0.177056	-0.261688	-0.181342	-0.236556	-0.261424	-0.260508	-0.261688	-0.222381	-0.259365	-0.236634	-0.261688	-0.189972	-0.256562	-0.236676	-0.190528	-0.232957
Z-score	Campylobacter hominis	-0.684037	0.857598	-0.044087	0.765866	-0.866168	-0.666486	0.294753	-0.866168	1.42418	-0.459679	-0.768933	-0.866168	-0.750036	0.165164	-0.780699	-0.866168	-0.252172	2.00363	2.3596
Z-score	Clostridium sp. CAG:571	1.1321	-0.37059	0.559114	1.63769	-0.836254	0.670353	-0.518252	0.563295	-0.693625	-0.836254	0.0990086	-0.836254	-0.0197297	-0.681598	-0.597047	-0.738344	-0.81111	2.91979	-0.6423
Z-score	Veillonella magna	-0.23897	-0.200382	-0.23897	-0.23897	-0.23897	-0.218554	4.24245	-0.23897	-0.23897	-0.23897	-0.23897	-0.23897	-0.23897	-0.23897	-0.23897	-0.23897	-0.23897	-0.23897	-0.23897
Z-score	Olsenella sp. Marseille-P2912	-0.456585	-0.41089	-0.246234	-0.446543	-0.456585	3.45743	-0.456585	-0.205096	0.147196	2.05464	-0.447402	-0.388413	-0.403179	-0.456585	-0.397059	-0.456585	-0.456585	0.465094	-0.440041
Z-score	Collinsella bouchesdurhonensis	1.5969	-0.774869	-0.524965	-0.626488	-0.790875	-0.131809	-0.736109	0.0426791	-0.470895	-0.522408	2.40689	2.41571	0.49572	-0.790875	0.195047	-0.328893	-0.650666	-0.170312	-0.633776
Z-score	Bacteroides sartorii	-0.340981	3.3016	-0.335972	-0.327821	-0.340981	-0.340981	-0.340981	-0.340981	-0.340981	-0.340981	-0.340981	-0.340981	-0.340981	-0.340981	-0.340981	-0.340981	-0.340981	-0.340981	2.47691
Z-score	Gemella sanguinis	1.92535	-0.0126464	-0.677163	-0.572852	-0.78213	2.30185	-0.380729	0.595571	2.31653	-0.271475	-0.408429	-0.757778	-0.690247	-0.289019	-0.131686	-0.78213	-0.703989	-0.333709	-0.34531
Z-score	Flavonifractor sp. 2789STDY5834895 & sp. 2789STDY5834937 / Clostridium sp. 2789STDY5608878	-0.718006	0.0906988	0.580719	-0.958757	0.149412	-0.0032788	-0.99765	1.95211	1.0716	-0.0288185	-1.05462	-0.154328	-1.05462	0.0820681	0.33681	-1.05462	-0.852976	-0.0376355	2.65191
Z-score	Streptococcus lutetiensis	-0.451518	-0.42744	-0.451518	-0.236355	-0.451518	-0.169994	-0.450637	-0.450079	0.140193	-0.437145	3.65219	-0.413283	-0.0975147	-0.448623	1.77826	-0.426914	-0.444916	0.224542	-0.437733
Z-score	Mycoplasma sp. CAG:472	-0.356653	-0.517498	0.407064	0.0628768	-0.754499	0.479053	0.925008	-0.720552	-0.745426	-0.228817	-0.210827	-0.738932	3.4628	1.34182	-0.461864	-0.482986	-0.754499	-0.295477	-0.410597
Z-score	Coprococcus catus	2.87111	-0.703977	-0.456674	-0.53768	-0.909547	0.344689	-0.906995	0.740518	-0.582309	0.581155	-0.358991	-0.724805	-0.13366	0.0440525	2.24871	-0.36471	-0.397952	0.105181	-0.858123
Z-score	Collinsella stercoris	-0.0558076	-0.436098	-0.445924	3.0082	-0.590611	-0.196288	-0.590611	0.395844	0.0841763	-0.590611	-0.590611	-0.590611	-0.467484	-0.590611	-0.590611	-0.590611	-0.590611	1.46976	1.95911
Z-score	Eubacterium sp. CAG:841	-0.592013	0.197712	0.10373	1.22736	-0.592013	-0.592013	0.304235	-0.592013	-0.558399	-0.592013	3.40206	1.42246	-0.137997	-0.592013	-0.578058	-0.129004	-0.592013	-0.517997	-0.592013
Z-score	Clostridium sp. CAG:508	-0.14019	-0.45244	0.184945	-0.314146	-0.484758	-0.448563	-0.47233	-0.419549	-0.4847	-0.439236	-0.413183	-0.473076	-0.0132815	4.00576	0.727998	0.0153782	-0.40934	0.362159	-0.331442
Z-score	Lactobacillus fermentum	4.11131	-0.359354	-0.384246	0.427491	-0.388623	-0.360023	-0.384112	0.244286	0.288561	-0.170984	-0.371098	-0.330988	-0.242187	-0.25902	-0.353379	-0.360808	-0.382422	-0.346242	-0.378167
Z-score	Coprobacillus sp. CAG:698	-0.416551	-0.53921	1.05533	0.351672	-0.53921	-0.53921	-0.53921	-0.53921	-0.53921	-0.53921	2.79367	-0.53921	2.39922	-0.53921	-0.531372	0.643984	-0.53921	-0.364644	-0.53921
Z-score	Senegalimassilia anaerobia	0.502473	-0.617384	-0.633718	-0.280265	-0.747564	-0.135445	-0.369334	-0.164364	-0.631128	-0.500731	3.56616	1.2257	0.9215	-0.747564	0.131818	-0.589194	-0.213091	-0.041854	-0.676011
Z-score	Clostridium sp. CAG:557	-0.596997	-0.619392	2.54241	0.372535	-0.619392	0.186843	-0.568362	-0.619392	-0.619392	-0.619392	-0.612024	-0.607889	1.20454	-0.619392	1.70856	-0.619392	-0.487785	1.80787	-0.613962
Z-score	Intestinimonas massiliensis	0.915481	-0.195343	0.102756	-0.699321	-0.98633	-0.14968	-0.78597	0.39536	0.478958	-0.152406	-0.971584	-0.123033	-0.615195	-0.371262	2.30824	-0.908555	-0.95381	2.65718	0.0545134
Z-score	Candidatus Methanomethylophilus alvus / Methanoculleus sp. CAG:1088	-0.339794	0.114851	1.3184	-0.243954	-0.430353	-0.106998	-0.430353	-0.430353	-0.375188	-0.430353	-0.241795	3.89711	-0.430353	-0.179666	-0.430353	0.00184886	-0.430353	-0.401992	-0.430353
Z-score	Oxalobacter formigenes 1	1.38272	2.73026	-0.19863	-0.70698	-0.77672	0.0300381	-0.702489	1.25838	-0.0332047	-0.77672	-0.77672	-0.657166	-0.77672	-0.238416	-0.303107	-0.77672	-0.77672	1.6028	0.496113
Z-score	Prevotella intermedia	-0.353359	0.225887	-0.320114	0.0902106	-0.353359	-0.353359	-0.353359	-0.353359	-0.199508	0.0322644	0.153594	4.16335	-0.353359	-0.353359	-0.353359	-0.353359	-0.353359	-0.353359	-0.258731
Z-score	Clostridium sp. CAG:273	1.09876	-0.727555	1.13459	-0.751785	-0.751785	1.05855	-0.751785	-0.522657	-0.125069	-0.629174	-0.751785	-0.740669	-0.751785	1.27668	2.74361	-0.751785	-0.751785	0.713067	-0.0176311
Z-score	Anaeroglobus geminatus	0.145154	-0.249986	-0.200635	-0.381983	-0.381983	-0.381983	-0.381983	1.14762	3.97757	-0.381983	-0.337953	-0.279933	-0.381983	-0.381983	-0.381983	-0.290419	-0.381983	-0.102868	-0.370706
Z-score	Mobilibacterium timonense	-0.292242	-0.281662	-0.292242	4.14709	-0.292242	-0.292242	-0.292242	-0.292242	-0.292242	-0.292242	0.65927	-0.292242	-0.292242	-0.292242	-0.239877	-0.292242	-0.292242	-0.212068	-0.273605
Z-score	Blautia sp. 2789STDY5608796 & sp. 2789STDY5608848	1.23207	-1.13097	-0.657539	-0.548966	-0.553741	1.34547	-1.1285	-0.582577	-1.07908	1.48167	0.212161	-0.9328	-0.308969	1.21752	1.64082	-0.852028	1.24137	0.314367	-0.910268
Z-score	Colibacter massiliensis	-0.241875	-0.241875	-0.152614	-0.241875	-0.241875	-0.241875	-0.241875	-0.241875	-0.241875	-0.241875	-0.241875	-0.241875	-0.241875	-0.241875	4.24177	-0.241875	-0.241875	-0.241875	-0.219163
Z-score	Mycoplasma sp. CAG:611	-0.0667001	-0.467559	0.0689076	-0.174554	-0.755017	0.163575	-0.152849	-0.691892	-0.739592	-0.673041	-0.685387	-0.714128	1.0935	3.37198	-0.270708	1.33193	-0.651197	0.648895	-0.636163
Z-score	Prevotella sp. CAG:1320	-0.40295	2.35843	3.16073	-0.40295	-0.40295	0.923692	-0.40295	-0.399864	-0.40295	-0.40295	-0.40295	-0.40295	-0.40295	-0.40295	-0.40295	-0.40295	-0.40295	-0.401691	-0.40295
Z-score	Clostridium sp. 7_2_43FAA	-0.497484	-0.254757	1.52312	2.21215	-0.571436	-0.571436	1.6218	-0.571436	2.25938	-0.470942	-0.218897	-0.571436	-0.571436	-0.571436	-0.517296	-0.571436	-0.571436	-0.5329	-0.55269
Z-score	Clostridium sp. CAG:451	-0.359055	-0.640521	0.527212	-0.790414	-1.16961	-0.0935338	0.0169739	-0.464272	-0.821338	0.542953	0.541328	-0.912878	2.99946	0.489347	-0.247242	-0.130914	-0.612483	1.89429	-0.769297
Z-score	Bacteroidales bacterium 52_46	-0.263761	-0.160045	4.2329	-0.210847	-0.263761	-0.263761	-0.263761	-0.263761	0.0252807	-0.263761	-0.263761	-0.263761	-0.263761	-0.263761	-0.263761	-0.263761	-0.263761	-0.263761	-0.194633
Z-score	Clostridium sp. CAG:780	-0.720251	0.377165	-0.0487539	-0.670295	-0.867205	3.17583	0.367065	-0.867205	-0.535321	-0.800929	1.60544	0.185358	0.0612038	-0.867205	0.194006	-0.226698	-0.867205	0.922709	-0.417708
Z-score	Peptoniphilus lacrimalis	-0.250047	2.41037	-0.473028	-0.226071	-0.713848	0.00640172	-0.713848	-0.713848	2.66278	0.0649917	-0.713848	-0.713848	-0.713848	-0.713848	-0.157748	1.24903	-0.713848	0.154912	0.269188
Z-score	Proteus mirabilis 2	-0.24535	-0.0683854	4.23934	-0.24535	-0.24535	-0.24535	-0.24535	-0.24535	-0.24535	-0.24535	-0.24535	-0.24535	-0.24535	-0.24535	-0.24535	-0.24535	-0.24535	-0.24535	-0.24535
Z-score	Lactobacillus gallinarum	-0.316702	-0.294827	-0.316702	4.12379	-0.316702	-0.316702	-0.316702	-0.163818	-0.316702	-0.316702	-0.316702	0.0590696	-0.316702	0.694446	-0.316702	-0.316702	-0.316702	-0.301537	-0.316702
Z-score	Peptostreptococcus sp. MV1	-0.310829	-0.206229	-0.310829	-0.310829	-0.310829	-0.310829	-0.310829	-0.310829	-0.310829	-0.310829	-0.014467	-0.113715	-0.310829	-0.310829	-0.310829	4.1613	-0.310829	0.524724	-0.310829
Z-score	Clostridium sp. CAG:524	-0.696344	-0.674571	2.84875	1.18439	-0.699447	0.197921	-0.328704	-0.456187	-0.699447	-0.387326	-0.599019	-0.416009	0.358433	-0.699447	-0.653568	0.54231	-0.336316	2.15857	-0.643991
Z-score	Butyricicoccus pullicaecorum	-0.363844	0.104533	-0.0107946	-0.38286	-0.38286	0.046383	0.186643	-0.106443	4.16636	-0.38286	-0.38286	-0.298681	-0.38286	-0.38286	-0.38286	-0.38286	-0.38286	-0.10399	-0.17443
Z-score	Coprobacillus sp. CAG:826	-0.52544	-0.52544	1.37174	0.401643	-0.52544	-0.509779	0.0408843	-0.52544	-0.506057	-0.52544	-0.484888	-0.502995	3.0065	-0.52544	2.10909	-0.332595	-0.52544	-0.487203	-0.428247
Z-score	Fusobacterium gonidiaformans	-0.536086	-0.530634	-0.180687	-0.293765	-0.536086	-0.526013	-0.536086	1.78267	-0.530816	-0.517278	3.03954	-0.536086	-0.498359	-0.42578	-0.526517	0.91724	-0.536086	1.46018	-0.489354
Z-score	Eubacterium sp. ER2	3.78005	-0.483277	-0.15858	-0.505672	-0.505672	0.74963	-0.306514	-0.217265	-0.376421	1.12929	-0.505672	-0.505672	-0.505672	-0.505672	-0.425601	-0.505672	-0.505672	0.323565	0.0304912
Z-score	Lactobacillus casei == paracasei	3.70193	-0.629331	-0.276678	-0.627852	0.459151	0.619432	-0.629568	0.830836	0.291017	-0.480424	-0.177064	-0.648931	-0.658094	-0.167095	0.480861	-0.658094	-0.658094	-0.137635	-0.634368
Z-score	Clostridium sp. 27_14	0.0770777	0.535316	0.976666	-0.220282	-0.883562	0.517023	-0.848087	0.257251	-0.350927	-0.788936	-0.613205	-0.536651	-0.728401	-0.132902	3.61868	-0.674104	-0.551774	0.175045	0.171775
Z-score	Bifidobacterium thermacidophilum	-0.235702	-0.235702	-0.235702	4.24264	-0.235702	-0.235702	-0.235702	-0.235702	-0.235702	-0.235702	-0.235702	-0.235702	-0.235702	-0.235702	-0.235702	-0.235702	-0.235702	-0.235702	-0.235702
Z-score	Firmicutes bacterium CAG:631	-0.469089	-0.400237	3.75275	-0.469089	-0.469089	-0.326902	-0.469089	0.936762	-0.254653	0.230889	-0.469089	-0.469089	-0.469089	-0.469089	-0.383119	-0.469089	-0.469089	-0.00775824	1.14316
Z-score	Firmicutes bacterium CAG:552	-0.609515	-0.603661	3.14131	-0.609515	-0.609515	0.232277	-0.609515	-0.609515	-0.609515	-0.609515	-0.215273	0.0901294	-0.492878	0.503414	2.23074	0.178341	-0.609515	0.193287	-0.38156
Z-score	Bacteroides sp. CAG:1060	-0.225322	-0.261023	-0.169341	-0.259256	-0.261023	-0.261023	-0.261023	-0.261023	-0.238735	-0.261023	-0.259934	-0.23633	0.0237882	-0.261023	-0.260798	4.23371	-0.261023	-0.25857	-0.261023
Z-score	Coprobacillus sp. CAG:605	-0.465288	-0.836974	0.589032	-0.280464	-0.86217	1.79598	0.58951	-0.86217	-0.86217	-0.86217	0.660329	-0.593323	2.39929	1.74382	0.160567	-0.681893	-0.85321	-0.347897	-0.430809
Z-score	Clostridium sp. CAG:568	-0.554182	-0.54163	0.0209121	0.248981	-0.5867	-0.414705	0.161537	-0.184187	-0.586344	-0.0159626	1.61623	-0.159485	-0.563825	3.61599	0.245605	-0.5867	-0.5867	-0.567911	-0.56092
Z-score	Mycoplasma sp. CAG:956	-0.201557	-0.591609	0.192293	1.52802	-0.625181	1.05795	2.81472	-0.625181	-0.625181	-0.625181	1.84445	-0.593524	-0.360864	-0.625181	-0.625181	-0.458873	-0.608365	-0.383033	-0.488523
Z-score	Firmicutes bacterium CAG:822	0.663262	-0.39414	-0.373976	-0.39414	-0.39414	-0.39414	-0.39414	-0.39414	-0.39414	3.18689	-0.39414	-0.39414	-0.39414	-0.39414	-0.39414	-0.39414	-0.39414	2.43593	-0.39414
Z-score	Allisonella histaminiformans	-0.781762	0.691173	0.118021	0.245888	-0.995848	-0.388789	-0.578599	0.707722	1.52416	0.229318	-0.408023	2.40999	-0.926602	-0.838186	-0.659388	-0.851433	1.93814	-0.71432	-0.721463
Z-score	Firmicutes bacterium CAG:582	-0.575745	-0.660533	0.10758	0.604652	-0.6637	-0.360153	0.457084	-0.6637	-0.648004	-0.0285649	2.697	-0.602759	2.5753	-0.6637	-0.542016	-0.651595	-0.6637	0.532495	-0.249938
Z-score	Eggerthella sp. CAG:368	1.32076	-0.659589	-0.0535133	-0.571525	-0.684582	0.0867218	-0.476389	-0.271816	-0.672363	-0.624108	2.73541	-0.53176	-0.00734485	-0.684582	2.29413	-0.488671	-0.684582	0.564687	-0.590882
Z-score	Prevotella corporis	-0.837104	2.16483	-0.197616	0.0322205	-0.837104	-0.732369	0.676256	-0.664579	-0.571498	-0.703542	-0.837104	-0.735072	-0.369669	1.80714	-0.648544	2.18419	-0.604758	0.310148	0.564171
Z-score	Streptococcus anginosus	2.58894	0.262629	-0.800965	-0.652335	-0.918222	0.564344	-0.918222	1.10777	1.31936	-0.542927	1.71243	0.134034	-0.601415	0.187608	-0.671759	-0.918222	-0.365596	-0.665109	-0.822343
Z-score	Clostridium sp. CAG:798	0.470437	-0.420563	0.290931	-0.423228	-0.423228	-0.423228	-0.423228	-0.0748489	-0.319801	-0.423228	-0.423228	-0.423228	-0.423228	-0.423228	3.85137	-0.423228	-0.423228	1.21571	-0.357723
Z-score	Clostridium sp. CAG:628	-0.81982	-0.816037	1.09183	-0.469739	-0.872787	0.394417	1.61616	-0.872787	-0.872787	-0.872787	-0.27991	-0.86196	1.56801	-0.872787	0.639888	1.16347	-0.219421	2.03146	-0.674413
Z-score	Clostridium sp. CAG:389	0.368734	0.281017	0.131929	0.0843734	-0.668248	-0.209208	-0.593753	-0.659155	-0.643255	-0.0363503	0.0776945	-0.524623	-0.484661	3.86515	-0.317763	-0.640714	0.846002	-0.421374	-0.4558
Z-score	Mycoplasma sp. CAG:877	-0.296342	-0.500271	-0.0386376	-0.265567	-0.525663	-0.525663	0.351397	-0.525663	-0.525663	0.0312485	0.922989	-0.448632	3.84542	-0.525663	0.685968	-0.491847	-0.485883	-0.517733	-0.163788
Z-score	Bacteroidales bacterium M7	-0.246382	-0.246382	-0.246382	-0.246382	-0.246382	-0.246382	-0.246382	-0.246382	-0.0500751	-0.246382	-0.246382	-0.246382	-0.246382	-0.246382	-0.246382	-0.246382	-0.246382	-0.246382	4.23858
Z-score	Bifidobacterium angulatum	-0.348732	-0.346124	-0.229842	-0.348067	-0.348732	0.168582	-0.273752	0.855479	-0.348434	-0.348732	-0.338708	4.0711	-0.348732	-0.348732	-0.248046	-0.348732	-0.348732	-0.181493	-0.33957
Z-score	Solobacterium moorei	-0.215515	-0.0269668	-0.43061	-0.434591	-0.553812	0.0468497	-0.389145	-0.266031	0.245409	-0.397014	4.03578	-0.440848	-0.468136	-0.395544	-0.37139	0.759538	-0.468059	-0.191573	-0.0383444
Z-score	Porphyromonas somerae	-0.651952	-0.530961	-0.0356487	-0.154185	-0.651952	-0.651952	-0.203465	-0.130794	-0.580177	-0.0197103	-0.173458	-0.42862	0.136694	0.661725	-0.406927	-0.651952	-0.651952	3.61195	1.51334
Z-score	Clostridium sp. CAG:533	-0.387463	-0.558748	1.44026	-0.0244552	-0.558748	-0.47802	-0.0927387	-0.558748	-0.501296	-0.558748	-0.425097	-0.517552	1.13256	-0.558748	0.394442	-0.25475	-0.558748	3.50302	-0.436417
Z-score	Faecalibacterium sp. CAG:1138	-0.487711	-0.491569	0.890321	-0.491569	-0.491569	-0.491569	-0.491569	-0.491569	-0.491569	-0.491569	0.0510158	-0.491569	3.3738	-0.491569	1.56311	0.999857	-0.491569	-0.491569	-0.491569
Z-score	Peptoniphilus harei	0.273611	1.02326	-0.58569	-0.696461	-0.794274	2.31639	-0.794274	-0.794274	2.11787	0.936241	0.999376	-0.794274	-0.794274	-0.794274	-0.0786371	-0.794274	-0.794274	0.391104	-0.342868
Z-score	Sphaerochaeta sp. Phil3	-0.298032	-0.298032	-0.215587	0.0151414	-0.298032	-0.298032	-0.298032	-0.298032	-0.298032	-0.298032	0.192328	-0.298032	-0.0391469	-0.298032	-0.298032	4.20475	-0.298032	-0.298032	-0.283069
Z-score	Clostridium sp. CAG:609	0.0750947	0.573608	-0.0276094	-0.655084	-0.951954	-0.62124	1.26894	-0.951954	-0.951954	-0.951954	-0.566764	-0.871522	2.14647	1.24335	1.04611	1.82672	-0.632667	-0.338668	-0.658919
Z-score	Verrucomicrobia bacterium CAG:312_58_20	-0.308971	-0.167313	-0.156488	-0.308971	-0.308971	-0.132155	-0.308971	4.18352	-0.288123	-0.308971	-0.305161	-0.295129	-0.308971	-0.308971	0.427706	-0.308971	-0.308971	-0.291548	-0.194577
Z-score	Corallococcus sp. CAG:1435	-0.280228	-0.280228	4.20534	-0.280228	-0.280228	-0.254842	-0.280228	-0.280228	0.30416	-0.280228	-0.280228	-0.280228	-0.280228	-0.280228	-0.280228	-0.280228	-0.280228	-0.125153	-0.206321
Z-score	Bacillus sp. CAG:988	-0.49814	-0.53179	0.997518	-0.53179	-0.53179	-0.53179	-0.53179	-0.365847	0.303182	1.82104	-0.53179	-0.53179	-0.53179	-0.53179	3.2199	-0.53179	-0.53179	-0.391525	0.763571
Z-score	Streptococcus sp. UBA632	-0.254701	-0.227362	-0.254701	-0.248753	-0.254701	-0.254701	-0.254701	-0.254701	-0.254701	-0.254701	4.23192	-0.254701	0.0647009	-0.254701	-0.254701	-0.254701	-0.254701	-0.254701	-0.254701
Z-score	Atopobium parvulum	1.13809	-0.512173	-0.484503	-0.62331	-0.62331	0.673492	-0.139141	-0.309868	2.90367	-0.62331	-0.62331	2.21687	-0.150008	-0.62331	-0.62331	-0.62331	-0.62331	-0.399763	0.0498135
Z-score	Dialister pneumosintes	-0.540043	1.5693	-0.492262	-0.259841	-0.540043	-0.540043	-0.473028	0.523032	3.6337	-0.540043	-0.165195	-0.492137	0.0716771	-0.540043	-0.540043	0.162581	-0.540043	0.115396	-0.412916
Z-score	Lactobacillus crispatus	-0.296444	0.150112	-0.384186	-0.312275	-0.384186	-0.248233	4.10339	-0.365337	0.646078	-0.353901	-0.290525	-0.384186	-0.384186	-0.384186	-0.315156	-0.384186	-0.122733	-0.357192	0.0673336
Z-score	Clostridium sp. CAG:575	4.11135	-0.287791	-0.0608847	-0.177496	-0.397433	-0.376048	-0.397433	-0.354425	-0.397433	-0.397433	0.609846	-0.243845	0.000700254	-0.397433	-0.325823	-0.343628	-0.397433	0.133566	-0.300926
Z-score	Clostridium sp. CAG:914	-0.729938	-0.341275	-0.160365	0.796104	-0.729938	0.270637	1.24026	-0.729938	-0.539118	-0.729938	-0.481523	-0.714932	1.30182	-0.729938	1.92595	-0.729938	-0.729938	2.45577	-0.643756
Z-score	Comamonas kerstersii	-0.371545	-0.32006	-0.360927	1.5273	-0.371545	-0.364211	0.368955	-0.369966	-0.370451	-0.371545	3.80675	-0.326933	-0.305827	-0.371545	-0.371545	-0.371545	-0.338815	-0.367882	-0.348671
Z-score	Clostridium sp. CAG:762	-0.490256	-0.630773	0.0918462	0.354665	-0.653341	0.976278	-0.541782	-0.653341	-0.653341	-0.653341	0.0500032	-0.630395	2.71467	-0.653341	2.15855	-0.599586	-0.653341	1.10596	-0.639128
Z-score	Firmicutes bacterium CAG:884	-0.440925	-0.544144	0.785161	1.48214	-0.544144	-0.544144	-0.373774	-0.544144	-0.544144	-0.544144	-0.226229	-0.544144	3.49219	-0.544144	0.385863	0.637288	-0.544144	-0.300266	-0.544144
Z-score	Eggerthella sp. CAG:1427	3.97818	0.111501	-0.282906	-0.361098	-0.438248	0.0285146	-0.438248	1.03695	0.05506	-0.329641	-0.438248	-0.410767	-0.438248	-0.438248	-0.0577868	-0.438248	-0.438248	-0.379825	-0.320447
Z-score	Veillonella sp. oral taxon 158	-0.827412	0.225992	2.65154	-0.639985	-0.674387	-0.162591	-0.073883	0.292625	1.78485	0.387606	1.91159	-0.847047	-0.790072	-0.745137	-0.701582	-0.660761	-0.313708	-0.449037	-0.368596
Z-score	Mycoplasma sp. CAG:776	2.64457	-0.545605	2.71948	-0.545605	-0.545605	0.373677	-0.545605	-0.533808	-0.231147	-0.193898	-0.545605	-0.545605	-0.545605	-0.545605	0.414082	-0.545605	-0.545605	0.806875	-0.543784
Z-score	Lactobacillus vaginalis	-0.238255	-0.242591	-0.24986	-0.247628	-0.24986	-0.148195	-0.242257	-0.13966	-0.247199	-0.24144	-0.24986	-0.248277	-0.24986	-0.24986	-0.246284	-0.24986	-0.24986	4.2405	-0.249692
Z-score	Lactobacillus parabuchneri	2.03401	-0.331679	-0.331679	-0.331679	-0.331679	3.60453	-0.331679	-0.331679	-0.331679	-0.331679	-0.331679	-0.331679	-0.331679	-0.331679	-0.331679	-0.331679	-0.331679	-0.331679	-0.331679
Z-score	Libanicoccus massiliensis	-0.322496	-0.371669	-0.368373	-0.00671289	-0.371798	-0.3589	-0.366408	-0.358208	-0.366281	-0.371798	3.81781	0.100514	1.55544	-0.371798	-0.369233	-0.371798	-0.371798	-0.359462	-0.367027
Z-score	Bacteroides sp. Marseille-P3208T	-0.334417	-0.284599	1.9749	-0.334417	-0.334417	-0.313167	-0.334417	-0.334417	3.63912	-0.334417	-0.334417	-0.334417	-0.334417	-0.334417	-0.334417	-0.334417	-0.334417	-0.334417	-0.334417
Z-score	Parvimonas micra	-0.454244	1.25906	-0.217312	-0.40917	-0.62168	3.00749	-0.42013	-0.600596	2.12366	-0.387547	-0.608602	-0.62168	-0.380667	-0.483068	-0.474784	-0.62168	-0.62168	0.47795	0.0546836
Z-score	Lactobacillus reuteri	0.43312	-0.187111	-0.292256	-0.297483	-0.297953	0.0209391	-0.297953	-0.297953	-0.295731	-0.294678	-0.29442	-0.297953	-0.297953	4.17845	-0.297953	-0.297953	-0.297953	-0.29605	-0.29116
Z-score	Alistipes sp. Zagget8	-0.447334	1.20126	-0.40586	-0.320218	-0.447334	-0.447334	1.05343	-0.447334	-0.412782	-0.288596	-0.447334	-0.447334	-0.447334	-0.273347	-0.447334	-0.447334	3.74297	-0.180736	-0.0901166
Z-score	Clostridium sp. CAG:710	-0.550861	-0.536699	0.359836	1.02972	-0.595132	0.0131921	2.30603	-0.595132	-0.593864	-0.595132	-0.101776	-0.54883	2.95482	-0.595132	-0.552709	-0.351567	-0.595132	0.0931989	-0.544835
Z-score	Collinsella aerofaciens	2.15683	-0.702936	-0.736585	-0.396831	-0.939149	-0.247926	-0.653277	0.291045	-0.286939	0.269259	0.658797	3.05201	0.216842	-0.866184	-0.128907	-0.505163	-0.394912	-0.0314343	-0.75454
Z-score	Parvimonas sp. KA00067	-0.335715	-0.211025	-0.323603	-0.0905374	-0.335715	-0.293365	0.0386801	-0.307319	-0.335715	-0.0930158	-0.2523	-0.335715	-0.0144534	-0.335715	-0.123317	4.2127	-0.335715	-0.192445	-0.335715
Z-score	Drancourtella sp. An12 & An57	3.97649	-0.327445	0.0618665	-0.385003	-0.385003	-0.385003	-0.385003	0.26659	1.05746	-0.385003	-0.385003	-0.385003	-0.385003	-0.385003	-0.351667	-0.385003	-0.385003	-0.351722	-0.096545
Z-score	Clostridium sp. CAG:921	0.65963	-0.713324	2.98407	0.362264	-0.767453	-0.226423	-0.197343	-0.767453	-0.741643	-0.767453	-0.0707454	-0.694506	1.66175	-0.767453	-0.364819	-0.632723	-0.767453	0.825543	0.985537
Z-score	Clostridiales bacterium S5-A14a	-0.3315	0.322853	-0.3315	-0.3315	-0.3315	-0.3315	-0.3315	0.1273	4.17227	-0.3315	-0.3315	-0.3315	-0.3315	-0.3315	-0.0372926	-0.3315	-0.3315	-0.0943605	-0.181259
Z-score	Clostridium sp. CAG:793	0.546944	0.14667	1.1393	-0.463926	-0.691048	-0.691048	-0.509715	3.41051	-0.691048	-0.691048	0.820636	0.233892	-0.413564	-0.691048	-0.641365	-0.609134	-0.468792	0.821403	-0.557619
Z-score	Prevotella sp. UBA641	-0.592998	-0.592998	-0.464135	2.30032	-0.592998	-0.592998	1.71913	-0.592998	-0.591291	-0.592998	1.40489	1.70626	1.0408	-0.592998	-0.592998	-0.592998	-0.592998	-0.592998	-0.592998
Z-score	Dielma fastidiosa	0.75767	0.364283	0.419649	-0.830541	-0.974215	0.248786	0.172208	-0.374741	-0.367908	-0.140831	-0.974215	-0.197896	-0.974215	-0.753045	0.481362	-0.974215	-0.445495	3.22911	1.33425
Z-score	Lactobacillus johnsonii	-0.228925	-0.226925	-0.238954	-0.238954	-0.238954	-0.216417	-0.230708	-0.238954	-0.238954	-0.238954	-0.238954	-0.238954	-0.238954	4.24257	-0.238954	-0.238954	-0.238954	-0.237724	-0.234422
Z-score	Acidiphilium sp. CAG:727	-0.470831	-0.24109	-0.161249	3.70881	-0.470831	-0.470831	-0.124441	-0.470831	-0.470831	-0.470831	-0.0173087	1.45664	-0.405177	-0.470831	-0.470831	0.762594	-0.307242	-0.451894	-0.453004
Z-score	Lactobacillus acidophilus	-0.0607283	-0.286455	-0.235142	-0.401309	-0.401309	-0.353092	3.98714	-0.401309	-0.395693	-0.0761934	-0.401309	-0.381288	-0.401309	-0.401309	0.378485	-0.401309	-0.401309	0.986422	-0.352978
Z-score	Clostridium sp. CAG:594	0.705773	-0.374275	-0.176064	1.13336	-0.877339	-0.063396	0.188439	-0.871568	-0.877339	-0.582559	0.958016	-0.877339	-0.461497	-0.877339	0.269433	1.09798	-0.566465	3.07069	-0.818506
Z-score	Succinatimonas hippei	-0.413192	-0.0229798	0.725609	-0.410265	-0.413192	1.03522	-0.413192	3.88073	0.0914092	-0.413192	-0.413192	-0.413192	-0.413192	-0.413192	-0.413192	-0.413192	-0.413192	-0.347173	-0.407438
Z-score	Acidaminococcus sp. CAG:917	-0.381234	-0.381234	3.94383	-0.381234	-0.381234	-0.381234	-0.381234	-0.381234	-0.156569	0.903993	-0.381234	-0.381234	-0.381234	-0.381234	-0.381234	-0.381234	-0.381234	0.747911	-0.101886
Z-score	Lactobacillus delbrueckii	3.96677	-0.429687	-0.485035	-0.180618	0.422931	-0.0380054	-0.181583	-0.475372	-0.349673	-0.212465	-0.538175	0.764713	-0.538175	-0.523144	0.228212	-0.385125	-0.538175	0.0193336	-0.526722
Z-score	Clostridiales bacterium UBA643	0.397291	-0.63808	-0.615761	-0.406476	-0.658149	-0.0159746	-0.655527	-0.602781	-0.601038	-0.445779	3.27409	-0.42595	1.97477	0.650376	-0.478579	0.343827	-0.0824599	-0.427982	-0.585815
Z-score	Christensenella minuta	2.29711	0.532115	0.0690465	-0.899366	-0.899366	1.28903	-0.784242	1.07353	-0.264224	-0.723536	-0.899366	-0.646962	-0.899366	-0.176539	0.0335541	-0.899366	-0.899366	1.83404	0.863275
Z-score	Turicibacter sanguinis 2	2.22137	-0.441126	-0.441663	-0.0476894	-0.727082	0.12027	-0.548255	-0.492344	0.319426	-0.491821	3.07917	-0.719111	-0.31648	-0.615203	0.939013	-0.523196	-0.457573	-0.298746	-0.558958
Z-score	Methanosphaera stadtmanae	1.09894	-0.630374	-0.601259	0.541474	-0.710178	0.827004	-0.710178	-0.597697	-0.686959	-0.710178	2.60134	-0.710178	1.62471	-0.541151	1.47864	-0.448063	-0.672671	-0.523379	-0.629843
Z-score	Acholeplasma sp. CAG:878	-0.599633	-0.316641	1.12382	3.55538	-0.599633	-0.599633	-0.175491	0.485961	-0.599633	-0.597971	0.0538534	-0.597443	0.368978	-0.599633	-0.308064	-0.582864	-0.45576	1.03971	-0.595301
Z-score	Clostridium sp. CAG:1193	-0.548167	-0.31128	1.52281	-0.28556	-0.584992	3.64634	-0.20304	-0.584992	-0.584992	-0.584992	-0.288698	-0.567118	0.570983	-0.584992	-0.105932	0.0404281	-0.584992	0.202848	-0.163665
Z-score	Megasphaera micronuciformis	-0.487069	-0.225143	1.27632	-0.480075	-0.489943	-0.489943	2.36012	-0.48523	2.97102	-0.436994	-0.412216	-0.340406	-0.458896	-0.457087	-0.486509	-0.489943	-0.489943	-0.022598	-0.35547
Z-score	Peptostreptococcus stomatis	0.0100129	3.33517	-0.327905	-0.311012	-0.467434	-0.0711049	-0.467434	-0.147593	2.36051	-0.22873	-0.467434	-0.392766	-0.467434	-0.467434	-0.467434	-0.467434	-0.467434	-0.231683	-0.255428
Z-score	Veillonella tobetsuensis	-0.53537	1.86732	-0.509403	-0.369029	-0.53537	-0.4005	0.868356	-0.492122	0.186422	-0.145549	3.42624	-0.53537	-0.434487	-0.53537	-0.514597	-0.319593	-0.0643502	-0.503898	-0.453325
Z-score	Hafnia paralvei	-0.388264	-0.275562	-0.108239	-0.402088	-0.402088	1.95291	-0.402088	0.28823	-0.363275	-0.402088	-0.402088	-0.402088	-0.402088	-0.402088	-0.402088	-0.402088	-0.341943	3.59001	-0.332985
Z-score	Clostridium sp. CAG:1000	-0.362306	-0.362306	0.522136	-0.362306	-0.362306	-0.362306	-0.362306	-0.362306	-0.362306	-0.362306	-0.355555	-0.362306	-0.362306	-0.362306	0.279487	4.05309	-0.362306	0.533573	-0.322753
Z-score	Anaeromassilibacillus sp. An172	3.1716	-0.434869	2.30139	-0.434869	-0.434869	-0.434869	-0.434869	0.166822	0.883232	-0.434869	-0.434869	-0.434869	-0.434869	-0.434869	-0.434869	-0.434869	-0.434869	-0.434869	-0.434869
Z-score	Anaerococcus obesiensis == vaginalis	-0.587224	1.14939	-0.717124	-0.127843	-0.853209	0.474452	-0.321892	-0.853209	2.52332	0.321017	-0.785028	-0.853209	-0.853209	-0.853209	-0.299354	1.80734	-0.853209	1.19429	0.487906
Z-score	Clostridium sp. Marseille-P2538	-0.426084	-0.426084	-0.426084	-0.426084	-0.426084	1.41635	-0.426084	1.15718	-0.426084	-0.426084	-0.426084	-0.426084	-0.426084	-0.426084	-0.426084	-0.426084	-0.426084	3.58877	0.228959
Z-score	Gordonibacter urolithinfaciens	3.89435	-0.324356	-0.41875	-0.589452	-0.596198	0.247625	-0.420613	0.471467	-0.387381	0.319253	-0.584469	0.0284746	-0.596198	-0.290327	0.0359093	-0.596198	-0.580139	0.735593	-0.348591
Z-score	Streptococcus infantarius	-0.359019	-0.3311	-0.390489	3.85593	-0.390489	-0.389164	-0.0211539	-0.377067	-0.390489	-0.388762	0.459344	-0.384845	-0.390489	-0.390489	-0.385854	-0.284062	1.33877	-0.390294	-0.390283
Z-score	Bacteroides acidifaciens	-0.507989	0.921811	-0.38938	-0.507989	-0.507989	-0.507989	-0.406943	-0.507989	-0.279528	-0.507989	-0.507989	-0.507989	-0.507989	-0.507989	-0.507989	-0.507989	2.76324	1.05618	2.43049
Z-score	Clostridium celatum	-0.63456	1.591	-0.292339	0.154497	-0.746087	1.5652	-0.670834	-0.583319	-0.339915	-0.625049	-0.174164	-0.735491	-0.694641	-0.746087	2.40906	-0.746087	1.79705	0.132175	-0.660416
Z-score	Enterobacter cloacae	-0.324371	-0.116191	-0.264015	0.641724	-0.324371	-0.324371	4.13859	-0.324371	-0.312398	-0.324371	-0.0521038	-0.324371	-0.324371	-0.324371	-0.324371	-0.31386	-0.162004	-0.324371	-0.316022
Z-score	Anaeromassilibacillus sp. An250	3.17395	-0.453643	0.731335	-0.748393	-0.232778	-0.289714	-0.620484	0.292134	0.0441398	-0.473283	-0.777915	-0.659407	-0.777915	-0.0549042	0.927713	-0.777915	-0.777915	1.7335	-0.258497
Z-score	Holdemania massiliensis	0.378456	0.708036	2.57788	-0.906541	-1.0843	-0.268695	2.06534	0.0717254	0.296984	0.150359	-1.05575	-0.681168	-1.0843	0.756097	-0.662703	-1.0843	-0.343882	0.388066	-0.22131
Z-score	Clostridium sp. CAG:1219	-0.0365411	-0.551368	1.68511	-0.0364344	-0.551368	0.0162569	-0.317228	-0.551368	-0.551368	-0.551368	-0.379311	-0.551368	2.68541	-0.551368	-0.551368	2.33804	-0.551368	-0.551368	-0.441629
Z-score	Butyricicoccus sp. 2789STDY5834927 / Clostridia bacterium UC5.1-1D1	2.5251	-0.149833	-0.292207	-0.99707	2.16995	0.263011	-0.252103	0.311608	0.914944	-0.443237	-0.99707	-0.609797	-0.99707	-0.473201	0.0641284	-0.99707	-0.912891	1.05006	-0.177265
Z-score	Catabacter hongkongensis	0.550985	1.21648	0.359645	-0.800177	-0.800177	0.443152	-0.384888	0.835102	1.10186	-0.800177	-0.800177	-0.800177	-0.800177	-0.800177	0.278611	-0.800177	-0.800177	2.99237	-0.191728
Z-score	Blautia sp. 2789STDY5834862	2.28576	-0.956638	0.00430489	-0.137192	-1.04323	0.481831	-0.97545	0.48374	-0.958459	0.236285	-0.380996	-0.686458	0.148444	-0.328894	2.70834	-0.40117	-0.525127	0.67108	-0.626176
Z-score	Prevotella bivia	-0.744331	1.53539	0.172161	-0.350458	-0.796918	-0.632133	-0.126116	-0.566372	-0.353077	-0.444929	-0.158628	-0.55844	-0.260124	3.01414	-0.458286	-0.796918	-0.796918	1.69785	0.624101
Z-score	Lactococcus lactis subsp. cremoris	1.37295	-0.427925	-0.24977	-0.498924	-0.502212	3.41982	-0.502212	-0.434998	-0.373211	1.61927	-0.502212	-0.496409	-0.461234	-0.371221	-0.170551	-0.502212	-0.502212	-0.187548	-0.229193
Z-score	Prevotella disiens	-0.443118	-0.210202	-0.274628	0.102373	-0.464193	-0.370544	-0.403687	-0.393929	-0.337789	-0.0457638	-0.339122	-0.375489	-0.312998	0.307186	-0.347381	4.13844	-0.415154	0.069513	0.116486
Z-score	Streptococcus mitis	0.652797	-0.262882	-0.673218	-0.47638	-0.0854323	0.351452	-0.434582	-0.00833947	3.96757	0.325693	-0.286165	-0.125529	-0.635352	-0.199277	-0.52504	-0.741511	-0.143141	-0.461344	-0.239323
Z-score	Citrobacter koseri	-0.240256	-0.238819	-0.234164	-0.240057	-0.240256	-0.239965	-0.239958	-0.239497	-0.180652	-0.240256	-0.233726	-0.239502	-0.240256	-0.240256	-0.240256	-0.240256	-0.240256	-0.233887	4.24227
Z-score	Bacteroides faecichinchillae	-0.750052	0.536495	-0.635015	0.656576	-1.01626	-0.621983	2.66932	-0.93586	-0.278224	-0.73505	-0.284102	0.930772	-0.575338	1.4712	-0.429802	-1.01626	1.56648	-0.205338	-0.347562
Z-score	Ruminococcaceae bacterium D5	1.13511	-0.355455	-0.588723	-0.554655	-0.850449	-0.60786	-0.850449	1.51586	1.06476	-0.799582	-0.850449	0.599598	-0.850449	-0.302432	0.989825	-0.850449	-0.703407	2.62568	0.233524
Z-score	Streptococcus vestibularis	0.922178	-0.287445	-0.683406	-0.721572	-0.912542	0.993283	-0.803176	1.02614	2.36748	0.444178	2.17967	-0.759506	-0.72372	-0.131472	-0.319184	-0.748603	-0.667395	-0.372086	-0.802834
Z-score	Porphyromonas endodontalis	-0.451888	-0.355375	-0.415827	-0.451888	-0.451888	-0.451888	1.97896	-0.451888	1.90783	-0.451888	-0.451888	2.90987	-0.451888	-0.451888	-0.451888	-0.451888	-0.451888	-0.451888	-0.150907
Z-score	Fenollaria massiliensis	-0.0722186	-0.097541	-0.198179	0.157157	-0.763996	-0.763996	-0.681436	-0.763996	0.781061	-0.220068	0.597854	-0.626879	0.0326178	-0.00802423	-0.0418955	-0.763996	-0.763996	3.72927	0.46826
Z-score	Christensenellaceae bacterium Phil10	-0.244746	-0.244373	-0.243349	4.24008	-0.244746	-0.244746	-0.244746	-0.244746	-0.244746	-0.244746	-0.244746	-0.244746	-0.244746	-0.244746	-0.0884171	-0.244746	-0.244746	-0.23889	-0.243345
Z-score	Bacteroidales bacterium M1	3.59743	-0.329312	2.04575	-0.332905	-0.332905	-0.332905	-0.332905	-0.332905	-0.320288	-0.332905	-0.332905	-0.332905	-0.332905	-0.332905	-0.332905	-0.332905	-0.332905	-0.332905	-0.332905
Z-score	Haemophilus pittmaniae	-0.533398	-0.397538	0.0469685	-0.159396	-0.556152	0.413718	-0.324667	0.0723927	2.13147	-0.556152	-0.556152	-0.432043	-0.556152	-0.556152	0.0178047	3.35744	-0.556152	-0.536089	-0.319757
Z-score	Streptococcus mutans	3.75086	-0.420481	-0.48044	-0.43894	-0.502334	1.07587	-0.502334	-0.32686	1.06478	-0.0676982	-0.337109	-0.497171	-0.479557	0.0866892	-0.190966	-0.502334	-0.502334	-0.270722	-0.458928
Z-score	Enterococcus gallinarum	-0.287405	-0.300483	-0.259546	-0.439732	-0.439732	3.78419	-0.186081	-0.439732	0.371093	-0.439732	1.54016	-0.264858	-0.173761	-0.439732	-0.329883	-0.439732	-0.439732	-0.414883	-0.400425
Z-score	Roseburia sp. CAG:309	-0.338414	-0.338414	1.52427	-0.338414	-0.338414	-0.338414	-0.338414	3.86401	-0.338414	-0.338414	-0.324388	-0.338414	-0.338414	-0.338414	-0.266239	-0.229167	-0.338414	-0.338414	-0.169109
Z-score	Clostridium sp. 2789STDY5834920	1.28307	-0.487793	-0.0756991	-0.521988	-0.521988	0.116786	-0.521988	-0.0811028	-0.441675	-0.170182	-0.521988	-0.521988	-0.521988	0.170652	3.80987	-0.521988	-0.521988	0.290948	-0.238976
Z-score	Enterobacter asburiae	-0.500502	-0.397965	1.96308	2.91153	-0.500502	-0.484927	-0.372829	-0.471499	0.508876	-0.500502	1.73503	-0.490513	-0.454246	-0.500502	-0.495519	-0.500502	-0.500502	-0.48682	-0.461185
Z-score	Gordonibacter sp. An232A / Coriobacteriaceae bacterium CHKCI002	0.885751	-0.452463	0.32595	-0.452463	0.596847	-0.420706	-0.415708	3.89898	-0.378993	-0.257001	-0.452463	-0.452463	-0.452463	-0.452463	-0.358717	-0.452463	-0.452463	0.181512	-0.438209
Z-score	Desulfovibrio sp. Zagget14	-0.540565	-0.404248	-0.40845	-0.481266	-0.540565	-0.138663	-0.430463	-0.300394	-0.278151	-0.540565	-0.528559	3.4356	-0.404969	1.09027	1.71365	-0.540565	-0.540565	0.250824	-0.412357
Z-score	Clostridium hylemonae	-0.29234	-0.0515842	-0.376057	-0.383692	4.10995	-0.031567	-0.383692	-0.383692	0.429555	-0.383692	-0.383692	-0.383692	-0.383692	-0.383692	-0.331491	-0.383692	-0.383692	0.0509966	0.329458
Z-score	Olsenella sp. An188	-0.365361	-0.356606	-0.256991	-0.365361	-0.365361	0.33028	-0.365361	4.11856	-0.296294	-0.0764175	-0.365361	0.182382	-0.365361	-0.365361	-0.365361	-0.365361	-0.365361	0.37406	-0.365361
Z-score	Streptococcus oralis	0.694447	0.0113827	-0.743762	-0.506201	-0.538719	0.311449	-0.681899	0.196283	3.82919	0.449827	-0.0378935	0.291868	-0.604257	-0.46965	-0.639468	-0.648515	0.0188209	-0.553236	-0.379671
Z-score	Lactobacillus farciminis
Z-score	Kluyvera georgiana	-0.409173	0.679982	-0.409173	0.0447014	-0.409173	-0.409173	0.147287	-0.409173	0.386774	-0.409173	0.0372617	-0.409173	4.02324	-0.409173	-0.409173	-0.409173	-0.409173	-0.409173	-0.409173
Z-score	Holdemania filiformis	1.36948	0.473635	2.19268	-0.953383	2.40729	-0.0889352	-0.891777	-0.373589	0.142817	-0.575974	-0.97046	-0.470179	-0.975967	-0.129642	0.211988	-0.975967	-0.84699	0.49483	-0.0398584
Z-score	Porphyromonas sp. HMSC065F10	0.0848133	-0.123671	-0.496406	-0.496406	-0.496406	-0.496406	-0.496406	-0.496406	1.73286	-0.496406	-0.234344	-0.496406	-0.496406	-0.496406	-0.496406	-0.496406	-0.496406	2.8491	2.14452
Z-score	Clostridium disporicum	4.01564	-0.185987	-0.358911	0.290879	-0.507357	-0.25224	-0.507357	-0.497777	0.00123291	-0.0611523	-0.0787935	-0.499765	-0.507357	-0.42494	0.774573	-0.507357	-0.169747	-0.0625249	-0.461063
Z-score	Porphyromonas asaccharolytica	-0.304212	2.48253	-0.490458	-0.509039	-0.559459	0.0332995	-0.559459	-0.559459	-0.36428	-0.559459	-0.226826	0.375388	-0.559459	-0.559459	-0.559459	-0.559459	-0.559459	1.3316	2.70713
Z-score	Tissierellia bacterium S7-1-4	-0.359577	1.5815	-0.396401	-0.552813	-0.552813	-0.342856	-0.318819	-0.552813	3.25689	-0.552813	-0.264464	-0.552813	-0.552813	1.47499	-0.552813	-0.552813	-0.552813	0.578668	-0.234629
Z-score	Bacteroides oleiciplenus	-0.253183	-0.0920047	4.23939	-0.231443	-0.253183	-0.253183	-0.170171	-0.253183	-0.219458	-0.253183	-0.253183	-0.253183	-0.253183	-0.253183	-0.253183	-0.253183	-0.253183	-0.250908	-0.237208
Z-score	Pseudoflavonifractor capillosus	1.27863	-0.686073	1.35799	-0.865089	1.66513	-0.463809	-0.478742	2.08825	0.906232	0.77255	-0.964557	-0.901721	-0.964557	-0.752119	0.240023	-0.964557	-0.964557	0.0746025	-0.377629
Z-score	Holdemania sp. Marseille-P2844	1.44199	-0.637626	1.46979	-0.787514	2.73281	0.534647	-0.841027	-0.204119	-0.439752	-0.0900664	-0.841027	-0.82708	-0.841027	0.229202	-0.253576	-0.841027	-0.841027	1.17464	-0.138202
Z-score	Streptococcus sp. I-P16	0.038944	1.57429	-0.537971	-0.541949	-0.609044	0.0836481	-0.482695	-0.0522525	3.66117	-0.426622	-0.0345554	-0.229044	-0.609044	-0.52269	-0.253472	-0.552794	0.452543	-0.427443	-0.531024
Z-score	Atopobium parvulum 2	0.331507	-0.362059	-0.626998	-0.643526	-0.713328	0.151048	0.56299	0.12827	2.89673	-0.713328	-0.620407	2.32952	-0.11103	-0.713328	-0.578112	-0.713328	-0.713328	-0.443801	0.552513
Z-score	Olsenella sp. KH3B4	-0.261539	-0.261539	-0.261539	4.22877	-0.261539	-0.135066	0.0859964	-0.261539	-0.261539	-0.261539	-0.261539	-0.261539	-0.261539	-0.261539	-0.261539	-0.261539	-0.261539	-0.261539	-0.25662
Z-score	Clostridium sp. 2789STDY5608831	2.34614	-0.769243	-0.385227	-0.421811	-0.987145	-0.170923	-0.952025	-0.446087	-0.653313	0.97545	-0.590768	-0.654748	0.0975244	-0.701	2.21818	1.58758	0.0424239	0.0686207	-0.603631
Z-score	Alistipes sp. An54 & An116	0.629916	0.276723	1.89838	-0.62633	-0.62633	-0.62633	-0.62633	2.54328	-0.479751	-0.62633	-0.62633	-0.62633	-0.62633	-0.62633	1.24475	-0.62633	-0.62633	1.40266	-0.62633
Z-score	Clostridium sp. 2789STDY5608793	-0.0057231	-0.344775	-0.0965834	-0.253436	3.45347	-0.178394	-0.802795	-0.660393	-0.335696	-0.0968925	-0.670681	1.14887	-0.349631	-0.410018	-0.475999	1.58729	-0.273202	-0.654363	-0.581051
Z-score	Lachnoclostridium sp. An118	-0.405719	-0.0409247	-0.41886	-0.562511	-0.562511	1.98672	3.1266	0.497835	1.20565	-0.562511	-0.562511	-0.562511	-0.562511	-0.562511	-0.562511	-0.562511	-0.562511	-0.071447	-0.254742
Z-score	Oxalobacter formigenes 2	-0.441782	-0.441782	3.69359	-0.441782	-0.441782	-0.441782	-0.441782	-0.441782	1.36873	-0.441782	-0.441782	-0.441782	-0.441782	-0.441782	0.719118	-0.441782	-0.441782	0.478379	-0.0748705
Z-score	Slackia piriformis	4.04939	-0.152277	-0.434599	-0.481381	-0.481381	0.40452	-0.481381	-0.100057	-0.284542	0.0536539	-0.481381	-0.428928	-0.481381	-0.481381	-0.0735347	-0.481381	0.372731	0.28318	-0.319864
Z-score	Desulfovibrio sp. An276	-0.341894	3.15308	2.65912	-0.341894	-0.341894	-0.341894	-0.341894	-0.341894	-0.341894	-0.341894	-0.341894	-0.341894	-0.341894	-0.341894	-0.341894	-0.341894	-0.341894	-0.341894	-0.341894
Z-score	Alistipes sp. CAG:831	-0.235702	-0.235702	4.24264	-0.235702	-0.235702	-0.235702	-0.235702	-0.235702	-0.235702	-0.235702	-0.235702	-0.235702	-0.235702	-0.235702	-0.235702	-0.235702	-0.235702	-0.235702	-0.235702
Z-score	Ruminococcus sp. JC304	2.37668	-0.876981	-0.675252	-0.746178	-0.929309	0.0618049	-0.939724	-0.201283	-0.842824	0.27987	2.00174	-0.820491	0.419707	-0.58479	0.707036	0.24176	1.56996	-0.184823	-0.856899
Z-score	Peptoniphilus senegalensis	-0.575815	1.20759	0.177005	1.13153	-0.575815	-0.575815	-0.575815	-0.575815	2.63326	-0.575815	-0.575815	-0.575815	-0.575815	-0.575815	-0.575815	-0.575815	-0.575815	2.23035	0.105862
Z-score	Desulfovibrio desulfuricans	-0.355031	0.092897	-0.135	-0.355031	-0.355031	-0.355031	-0.355031	-0.355031	4.06781	0.80033	-0.355031	-0.355031	-0.355031	-0.355031	-0.355031	-0.355031	-0.355031	0.144392	-0.355031
Z-score	Mollicutes bacterium Phil14	-0.273089	-0.273089	0.0763193	-0.273089	-0.273089	-0.273089	-0.273089	-0.273089	-0.273089	-0.273089	-0.273089	-0.273089	0.0746422	-0.273089	4.21846	-0.273089	-0.273089	-0.273089	-0.273089
Z-score	Neglecta timonensis	-0.305851	-0.344329	-0.317129	-0.354661	-0.354661	-0.193281	-0.354661	-0.328409	-0.133303	-0.354661	-0.354661	-0.354661	-0.354661	-0.354661	4.04944	-0.354661	-0.354661	0.907535	0.211941
Z-score	Clostridioides difficile	-0.243585	-0.200605	-0.238337	-0.243585	-0.243585	-0.243585	-0.243585	-0.243585	-0.243585	-0.163386	-0.243585	-0.243585	-0.243585	-0.243585	-0.243585	-0.243585	-0.243585	-0.229293	4.24182
Z-score	Faecalicatena contorta	1.49764	-0.374921	-0.83531	-1.01639	0.842225	1.85533	-0.865312	0.670543	0.000959121	0.362666	-1.07985	-0.14182	-1.07985	-0.203343	1.41904	-1.07985	-1.07985	1.56668	-0.458564
Z-score	Desulfovibrio sp. 92-2	-0.53428	-0.0611942	0.472286	-0.53428	-0.53428	1.77464	-0.185753	-0.53428	-0.223467	-0.53428	-0.53428	-0.365724	-0.53428	-0.53428	-0.43394	-0.53428	-0.53428	3.37294	0.993007
Z-score	Enterococcus avium	3.70074	-0.382154	-0.370806	-0.481455	-0.481455	0.0597266	0.741032	-0.481455	1.30941	0.429034	-0.223017	-0.481455	-0.481455	-0.481455	-0.481455	-0.481455	-0.481455	-0.44941	-0.481455
Z-score	Lachnoclostridium sp. An14	-0.294286	-0.287367	-0.246273	-0.294286	-0.294286	-0.148484	-0.294286	4.16299	0.571762	-0.294286	-0.294286	-0.294286	-0.294286	-0.294286	-0.294286	-0.294286	-0.294286	-0.294286	-0.226911
Z-score	Olsenella sp. Marseille-P3256	-0.262959	-0.186295	-0.262959	-0.262959	-0.262959	-0.262959	-0.262959	4.22252	0.17112	-0.262959	-0.262959	-0.262959	-0.262959	-0.262959	-0.262959	-0.262959	-0.262959	-0.262959	-0.262959
Z-score	Streptococcus australis	1.79921	-0.389043	-0.773253	-0.561722	-0.39183	1.06416	-0.872014	1.05134	2.6568	-0.350326	1.16956	-0.748424	-0.938712	-0.518771	-0.11726	-0.197695	-0.492587	-0.580845	-0.808599
Z-score	Enterococcus asini	-0.302938	1.12947	-0.302938	-0.302938	-0.302938	-0.302938	-0.302938	-0.302938	4.02047	-0.302938	-0.302938	-0.302938	-0.302938	-0.302938	-0.302938	-0.302938	-0.302938	-0.302938	-0.302938
Z-score	Cloacibacillus evryensis	-0.292476	-0.232783	-0.235216	-0.286693	-0.292476	-0.268001	-0.292476	-0.292476	-0.0296894	-0.266173	-0.275862	-0.27547	-0.292476	4.21757	-0.236738	-0.292476	-0.292476	0.152605	-0.216216
Z-score	Phocea massiliensis	-0.642618	1.33178	-0.0890193	-1.2216	1.33549	-0.234306	-1.23814	0.421606	1.74189	-0.169792	-1.25661	0.415588	-1.25661	-0.032058	-0.116445	-1.25661	0.0561258	0.290722	1.92062
Z-score	Bacteroides stercorirosoris	-0.400881	0.256449	3.93145	-0.410612	-0.410612	0.845571	-0.387977	-0.406101	-0.408516	-0.410612	-0.40816	-0.410612	-0.410612	-0.410612	-0.410612	-0.410612	-0.410612	0.660104	0.0135727
Z-score	Faecalicatena fissicatena	1.397	-0.00556244	0.00310264	-0.457967	-0.470355	-0.31096	-0.470355	-0.470355	3.79971	-0.470355	-0.470355	-0.43296	-0.470355	-0.470355	0.332816	-0.470355	-0.470355	0.026772	-0.118753
Z-score	Streptococcus gordonii	1.39292	-0.208267	-0.907294	-0.621635	-1.0477	0.634866	-1.0477	0.815219	1.61409	1.09582	2.36733	0.141569	-0.864456	-0.38068	-0.751312	-0.756835	-0.0211269	-0.614936	-0.839871
Z-score	Raoultella ornithinolytica	0.0589012	-0.231167	0.481689	-0.256397	-0.516273	-0.464155	-0.516273	-0.454328	3.9074	-0.269682	-0.454493	0.847975	-0.493901	-0.516273	0.393144	-0.516273	-0.516273	-0.00809478	-0.475521
Z-score	Enterobacter ludwigii	-0.353053	-0.235595	3.86099	-0.345514	-0.392057	-0.223854	-0.33947	-0.37722	1.49957	-0.317111	-0.00433308	-0.343742	-0.392057	-0.392057	-0.326097	-0.392057	-0.392057	-0.250534	-0.283746
Z-score	Clostridium neonatale	-0.43228	0.648797	0.445581	1.76671	-0.43228	-0.43228	-0.43228	-0.43228	3.53911	-0.43228	-0.384172	-0.43228	-0.43228	-0.43228	-0.43228	-0.43228	-0.43228	-0.43228	-0.396382
Z-score	Lactobacillus oris	3.76448	-0.281244	-0.384533	-0.380537	-0.384533	-0.341281	-0.355435	0.363078	-0.233141	-0.384533	-0.384533	1.61474	-0.384533	-0.384533	-0.342065	-0.384533	-0.384533	-0.354001	-0.378331
Z-score	Anaerofilum sp. An201	0.0418185	-0.135286	-0.495508	-0.650506	3.27707	0.0175193	-0.664163	0.626332	0.465735	0.0480109	-0.664163	-0.654701	-0.664163	-0.664163	1.87923	-0.664163	-0.664163	0.142469	-0.577202
Z-score	Blastocystis sp. subtype 9	-0.376399	-0.337649	0.767004	-0.376399	-0.376399	0.129908	-0.376399	-0.376399	0.243044	-0.376399	-0.376399	-0.376399	-0.376399	4.05208	-0.376399	-0.376399	-0.376399	-0.319306	-0.018294
Z-score	Prevotella melaninogenica	-0.338317	-0.336061	-0.267482	-0.32687	-0.338317	-0.338317	-0.338317	-0.338317	-0.0229907	-0.211791	-0.338317	1.13747	-0.338317	-0.278897	-0.338317	-0.338317	-0.338317	-0.316103	4.00589
Z-score	Fusobacterium periodonticum	-0.44031	0.163913	-0.371163	-0.347182	-0.44031	-0.44031	-0.44031	-0.44031	2.77411	0.365308	-0.44031	-0.218698	-0.44031	-0.44031	-0.44031	-0.44031	-0.44031	-0.44031	2.91743
Z-score	Prevotella jejuni	-0.505568	-0.404857	1.37618	-0.505568	-0.505568	-0.505568	-0.505568	-0.505568	0.984067	0.185581	-0.505568	3.39848	-0.505568	-0.505568	-0.505568	-0.505568	-0.505568	-0.505568	1.03292
Z-score	Haemophilus sp. CCUG 66565	-0.511578	-0.295864	-0.511578	-0.511578	-0.511578	-0.511578	0.52598	-0.511578	3.02267	2.11692	1.29916	-0.511578	-0.511578	-0.511578	-0.511578	-0.511578	-0.511578	-0.421726	-0.108207
Z-score	Prevotella salivae	-0.359045	-0.359045	-0.310802	-0.359045	-0.359045	-0.359045	-0.359045	-0.359045	0.146558	-0.124186	-0.359045	1.44576	-0.359045	-0.359045	-0.359045	-0.359045	-0.359045	-0.359045	3.8693
Z-score	Lachnoanaerobaculum saburreum	-0.306564	-0.175146	-0.261178	-0.306564	-0.306564	-0.306564	-0.306564	-0.306564	0.778529	-0.306564	-0.306564	-0.209306	-0.306564	-0.306564	-0.306564	-0.306564	-0.306564	-0.265675	4.11811
Z-score	Alloprevotella tannerae	-0.36495	-0.292009	-0.36495	-0.285659	-0.36495	-0.36495	-0.36495	4.06322	0.364229	-0.36495	-0.36495	0.619271	-0.36495	-0.36495	-0.36495	-0.36495	-0.36495	-0.36495	0.275294
Z-score	Fusobacterium nucleatum subsp. polymorphum	-0.292911	-0.122336	4.20631	-0.292911	-0.292911	-0.292911	-0.292911	-0.292911	0.176242	-0.292911	-0.292911	-0.292911	-0.292911	-0.292911	-0.292911	-0.292911	-0.292911	-0.233163	0.0737024
Z-score	Prevotella denticola	-0.38488	-0.219526	-0.38488	-0.38488	-0.38488	-0.38488	-0.38488	0.699792	1.58994	-0.38488	-0.38488	3.703	-0.38488	-0.38488	-0.38488	-0.38488	-0.38488	-0.38488	-0.38488
Z-score	Haemophilus paraphrohaemolyticus	-0.512513	2.49811	-0.41256	-0.170478	-0.512513	-0.512513	0.4892	-0.512513	-0.372486	-0.512513	2.96582	-0.512513	-0.311389	-0.512513	-0.376741	-0.512513	0.758672	-0.512513	-0.455533
Z-score	Haemophilus parahaemolyticus	-0.705559	0.465932	-0.383718	0.21062	-0.705559	0.376387	0.859516	-0.705559	0.36134	0.497379	1.4349	3.21308	-0.705559	-0.705559	-0.705559	-0.705559	-0.705559	-0.705559	-0.685406
Z-score	Haemophilus sputorum	-0.465767	0.38899	-0.261247	-0.465767	-0.465767	-0.465767	-0.226563	-0.465767	0.000798202	0.245924	4.01778	-0.248949	0.651748	-0.465767	-0.465767	-0.465767	-0.465767	-0.0990433	-0.277536
Z-score	Lactobacillus gasseri 1	4.00197	-0.266293	-0.347364	-0.385449	-0.385449	0.058272	-0.322852	0.278351	-0.385449	-0.373352	-0.385449	-0.385449	-0.385449	-0.385449	0.987951	-0.385449	-0.385449	-0.223845	-0.323797
Z-score	Prevotella veroralis	-0.301721	-0.301721	1.09871	-0.301721	-0.301721	-0.301721	-0.301721	-0.301721	-0.301721	-0.301721	-0.301721	4.03054	-0.301721	-0.301721	-0.301721	-0.301721	-0.301721	-0.301721	-0.301721
Z-score	Streptococcus salivarius 2	2.35926	-0.581117	-0.533272	-0.59241	-0.59241	-0.240926	0.24312	-0.548122	0.638922	-0.59241	-0.490186	0.020214	2.89707	-0.59241	-0.454111	-0.59241	-0.59241	0.832706	-0.589092
Z-score	Enterobacter mori	-0.37781	-0.214296	3.23771	0.222841	-0.514399	-0.514399	-0.302518	-0.514399	0.0693354	-0.514399	2.16687	-0.514399	-0.514399	-0.514399	-0.463696	-0.514399	-0.514399	0.796887	-0.505731
Z-score	Citrobacter freundii	-0.126715	-0.0849626	-0.363765	1.47825	-0.469865	-0.198071	-0.435676	3.84262	-0.308958	-0.275678	-0.24335	-0.436632	-0.469865	-0.464432	-0.340052	-0.462443	-0.2935	0.0611163	-0.408018
Z-score	Clostridium sp. CL-2	-0.25171	-0.500321	-0.394081	0.196389	-0.581335	2.89243	-0.581335	-0.554542	2.41674	-0.542829	-0.14296	-0.315917	-0.581335	-0.581335	1.20385	-0.581335	-0.480116	-0.283657	-0.336599
Z-score	Aeromonas caviae	-0.323663	-0.294361	-0.323663	0.756877	-0.323663	-0.323663	-0.323663	-0.323663	-0.255969	-0.323663	-0.295086	4.09747	-0.323663	-0.323663	-0.323663	0.19613	-0.323663	-0.323663	-0.321104
Z-score	[Clostridium] hiranonis	-0.374413	0.293879	-0.374413	-0.374413	-0.374413	-0.374413	-0.374413	-0.374413	-0.159467	-0.374413	-0.374413	-0.374413	-0.374413	-0.374413	-0.374413	-0.374413	-0.374413	3.6791	1.80269
P-value	Acetobacter sp. 46_36 & CAG:267	4.3445e-23	4.30175e-11	1.32056e-53	0.00418528	0.651613	0.0139534	0.0172568	0.0876423	0.112645	0.00474245	0.0162505	0.13343	0.175297	2.47537e-15	0.0076883	0.240602	0.381869	2.91452e-13	2.42915e-07
P-value	Acetobacter sp. CAG:977	0.545642	0.411158	0.0867346	0.28293	0.879189	0.00448419	0.422886	0.545642	0.353851	0.583206	0.418608	3.28021e-132	0.648199	0.776111	0.568996	0.692815	0.76847	0.207203	0.0723178
P-value	Acholeplasma sp. CAG:878	0.338286	0.00217127	1.18209e-09	5.27306e-161	0.809671	0.346126	0.723137	0.907082	0.141774	0.775283	4.32899e-12	0.636996	2.96661e-10	0.652255	0.817712	0.325979	0.0880145	0.182883	0.00759264
P-value	Acidaminococcus fermentans	0.259311	0.155641	0.000459686	4.61155e-22	0.807778	6.59811e-15	0.264307	0.252829	0.00524536	0.786681	0.610462	0.00549197	0.512777	0.0770887	0.179682	0.527188	0.637509	0.0666482	0.00689104
P-value	Acidaminococcus intestini	0.219206	4.63247e-15	0.451505	0.000568669	0.479076	0.426061	0.872996	2.70428e-06	0.000335306	0.89842	0.000164162	0.00163495	0.0336108	0.033218	0.070033	0.201362	0.170446	0.327623	3.31318e-45
P-value	Acidaminococcus massiliensis	0.137857	3.42655e-34	0.0545636	7.49508e-07	0.615322	0.856468	0.504529	0.350405	0.108483	0.0696699	0.0573147	2.13208e-24	0.131456	0.347137	0.178319	0.191569	0.028078	0.000252826	5.17757e-13
P-value	Acidaminococcus sp. CAG:542	0.31392	0.00182529	0.173771	4.102e-10	0.800041	2.8835e-05	8.96716e-09	0.31392	0.381643	0.360517	0.54928	3.01769e-19	0.447058	0.635562	0.342579	0.510348	0.623743	0.273301	7.64066e-05
P-value	Acidaminococcus sp. CAG:917	0.605657	0.0156768	3.74234e-34	0.358966	0.89668	0.611478	0.493542	0.605657	0.609763	0.000107849	0.489553	0.493542	0.696679	0.808031	0.62656	0.735742	0.801429	7.44345e-28	0.569102
P-value	Acidiphilium sp. CAG:727	0.131297	2.18006e-05	0.598506	0	0.704284	0.137626	6.29372e-14	0.131297	0.0205746	0.170638	1.5787e-34	2.87225e-61	0.122425	0.477628	0.15498	5.24478e-31	0.500019	0.00498383	1.44971e-07
P-value	Acinetobacter sp. N54.MGS-139 / Proteobacteria bacterium CAG:139	0.0121449	0.819889	0.0871842	1.01529e-15	0.258052	0.409478	1.02388e-07	0.762745	0.000674798	0.194283	1.66955e-09	0.00046391	0.00068516	0.128209	0.0428388	0.00328621	0.0284921	0.522216	2.17429e-07
P-value	Actinomyces oris	2.98522e-29	1.52956e-18	2.85187e-05	0.930737	0.436104	7.12557e-22	0.000145787	1.12654e-10	0.0430286	3.69901e-14	7.88644e-08	3.61095e-62	0.218934	0.145085	2.74267e-06	0.0429619	0.000134852	1.38036e-06	3.03455e-08
P-value	Adlercreutzia equolifaciens	6.77643e-19	0.768968	0.40693	1.3115e-39	0.0364933	0.00985409	1.6548e-19	0.000687538	0.887947	8.12533e-11	1.56913e-22	0.000377742	3.38489e-10	0.455931	3.89579e-16	5.43649e-08	0.0283533	9.36763e-38	0.445096
P-value	Aeromonas caviae	0.581574	0.0507245	0.456686	0.00043522	0.889758	0.587674	0.464873	0.581574	0.397836	0.616802	0.518846	0.0361334	0.677347	0.795368	0.603498	0.0143518	0.788351	0.250066	0.124985
P-value	Aeromonas veronii	0.481212	1.50304e-24	0.341435	0.672943	0.85938	0.488305	0.350244	0.481212	0.90151	0.522463	0.88669	0.86983	0.59486	0.740286	0.506803	0.0825876	0.731513	0.141506	0.00576948
P-value	Agathobaculum desmolans	0.000334815	0.212341	0.71856	0.635437	0.946498	0.792912	0.723441	0.000332007	0.68227	0.808562	0.720989	0.723441	0.840336	0.900073	0.801446	0.861529	0.896583	2.26701e-05	0.545399
P-value	Aggregatibacter segnis	0.176252	1.29273e-11	0.479992	0.252409	0.733741	0.183322	0.0728659	0.546227	0.646606	0.703105	1.40448e-43	0.572787	0.307225	0.524499	0.202466	0.376676	0.510042	0.0380456	5.4173e-06
P-value	Akkermansia muciniphila	4.99224e-07	1.47836e-28	1.33669e-09	7.67237e-09	0.467542	0.00013707	0.915537	0.0270139	0.00208626	0.174891	1.4639e-06	9.42891e-06	0.596551	0.00169353	3.66739e-11	0.000490615	0.568272	7.76836e-59	3.04387e-10
P-value	Akkermansia sp. CAG:344	0.0567223	0.0370874	0.652788	3.96552e-05	0.392843	0.257336	0.0106897	0.233386	0.506244	0.0245505	1.54607e-05	0.242664	0.0103145	0.398153	0.601484	0.0263647	0.71008	0.963988	6.74061e-07
P-value	Akkermansia sp. KLE1605	0.622953	2.2314e-14	0.18736	0.00216737	0.664454	0.626393	0.0221648	0.0845928	0.0660226	0.069224	0.0209595	0.0221648	0.192885	0.417031	2.60258e-05	0.259595	0.400864	0.258906	9.99193e-106
P-value	Alistipes finegoldii	0.00156792	3.96064e-36	0.035765	4.9334e-24	0.348143	0.907124	3.26383e-08	0.984903	1.81359e-05	0.60632	1.51352e-16	0.000127597	1.39052e-10	0.29605	0.000131333	2.77794e-08	0.0458254	1.18245e-14	3.3666e-47
P-value	Alistipes ihumii	0.718235	6.35887e-10	5.52914e-05	4.44212e-24	0.57349	0.217341	1.63034e-08	0.0251607	5.56427e-05	0.156161	2.34508e-16	6.12279e-05	3.88679e-06	0.0466894	5.05221e-05	6.40678e-05	0.508583	2.5285e-50	1.75086e-05
P-value	Alistipes indistinctus	0.000274899	0.0529699	0.000233791	2.73831e-20	0.0612026	0.0797887	0.00194141	0.737933	6.9405e-12	0.149147	4.67531e-19	0.112382	1.8978e-08	0.803287	0.00373831	1.13839e-06	0.556091	1.04602e-09	0.657067
P-value	Alistipes inops == Tidjanibacter massiliensis	0.0460381	4.85884e-10	1.93539e-33	2.18967e-09	0.38369	0.000265898	0.0136549	3.67806e-08	0.516689	0.19682	1.25916e-05	0.000605765	0.00892069	0.0496441	1.03543e-24	0.0235703	0.0915853	3.91605e-114	0.310285
P-value	Alistipes obesi	0.234371	1.85741e-15	1.70192e-06	2.008e-16	0.224046	0.0128673	0.0673863	0.00145953	3.29743e-05	0.00424777	8.31208e-19	0.000933777	2.22664e-09	0.467503	0.00290264	2.25448e-07	0.436914	6.82283e-39	1.29902e-08
P-value	Alistipes onderdonkii	0.00293956	1.75976e-10	0.71289	1.75914e-61	0.680325	0.133239	3.25582e-18	0.0258221	2.00729e-07	0.0234483	5.21287e-36	0.937261	4.9446e-14	0.870502	0.0728996	1.63243e-10	0.000596416	3.65449e-13	1.7514e-30
P-value	Alistipes putredinis	8.87171e-05	0.000150185	0.372716	4.44193e-56	0.0717238	0.110484	1.12429e-08	0.329297	2.62547e-09	0.954141	5.20098e-36	0.287201	8.07975e-14	0.238315	0.889051	1.11718e-10	0.0817385	0.0111709	3.20381e-26
P-value	Alistipes senegalensis	0.367945	0.0178264	2.65395e-06	3.12644e-10	0.174641	0.0176927	0.029179	0.376265	0.0260214	0.00368981	0.89287	5.06498e-26	0.888551	0.339936	4.69261e-10	0.0224091	0.00515331	0.0325307	0.0295202
P-value	Alistipes shahii	2.09896e-07	0.000211291	0.333265	2.27204e-25	0.00646771	0.471913	1.92446e-07	0.0598595	3.81715e-12	0.745009	3.16073e-26	0.00248642	1.89661e-11	0.0954726	0.737136	5.93096e-12	0.149688	0.0606992	2.01912e-19
P-value	Alistipes sp. An31A	0.373325	0.000135623	1.81876e-11	0.113644	0.822816	1.36729e-17	0.237727	0.373325	0.880671	4.57932e-21	0.233413	0.237727	0.501476	0.0457534	0.705529	0.560589	0.664525	2.58826e-51	0.910495
P-value	Alistipes sp. An54 & An116	0.148285	0.317396	2.2249e-12	0.359271	0.896745	0.611704	0.493816	0.14643	0.612856	0.639436	0.489828	0.493816	0.696861	0.80815	0.000221891	0.735903	0.801552	6.39209e-28	0.0433565
P-value	Alistipes sp. CAG:268	0.703221	8.61833e-08	2.33076e-33	0.00356266	0.680099	0.00307322	0.0296751	5.62875e-16	0.17808	0.207551	0.0281973	0.0900407	0.21582	0.000943427	1.788e-09	0.283892	0.424551	2.94565e-143	0.0496539
P-value	Alistipes sp. CAG:435	0.15334	2.78237e-14	0.0257725	0	0.491147	0.51851	0.00043532	0.135853	0.000756339	0.105922	5.06276e-92	9.77902e-195	2.56164e-75	0.197692	0.018356	8.93431e-47	0.704457	0.000539486	1.7996e-11
P-value	Alistipes sp. CAG:514	2.25902e-10	1.22087e-06	0.00470376	0.28234	0.734147	0.590315	0.227427	0.846226	0.618215	0.186607	0.268583	2.98165e-297	6.38459e-47	0.317834	0.635626	1.94815e-155	0.352307	1.97474e-28	0.0108928
P-value	Alistipes sp. CAG:831	0.894287	0.534685	5.09273e-96	0.813356	0.973356	0.895981	0.860116	0.894287	0.838457	0.903964	0.858836	0.860116	0.920086	0.950145	0.900338	0.930782	0.948396	0.78154	0.603214
P-value	Alistipes sp. CHKCI003	0.779294	0.844684	0.705062	0.618545	0.943813	0.782759	0.710155	0.779294	0.667238	1.65903e-34	0.707597	0.710155	0.832428	0.895079	0.791692	0.854646	0.891417	0.000120909	0.272885
P-value	Alistipes sp. Marseille-P2431	0.054385	5.78006e-158	0.122146	2.4074e-05	0.550466	0.0606336	0.00514211	0.0175959	0.002234	0.0311216	0.00148049	0.0053979	0.0730873	0.263953	0.200541	0.120724	0.797355	0.000874281	7.15214e-14
P-value	Alistipes sp. Zagget8	0.0214321	6.38193e-55	0.0377946	0.0238158	0.562911	0.0236228	0.0514859	0.0214321	0.000413668	0.28637	0.00207203	0.00227751	0.082452	0.903089	0.0301689	0.132694	0.0057748	0.00366756	6.73245e-08
P-value	Alistipes timonensis	0.446892	0.000244133	0.0425103	0.000694009	0.574914	0.21683	0.00957041	0.751799	0.0317231	0.648792	0.0028317	0.275699	0.0922758	0.298925	0.64114	0.144958	0.880852	1.0085e-09	4.24413e-05
P-value	Allisonella histaminiformans	0.0725375	7.003e-41	0.397181	0.000437023	0.250626	0.415065	0.419405	0.690685	0.00693057	0.467116	0.64527	8.43904e-42	0.0135814	0.123862	0.0134642	0.147274	0.000110096	3.50555e-06	1.93101e-30
P-value	Alloprevotella tannerae	0.613381	0.362522	0.494981	0.794803	0.898876	0.619109	0.50282	0.000416906	0.580767	0.646399	0.498876	0.390332	0.702846	0.812054	0.633946	0.741182	0.805585	0.291652	0.086765
P-value	Anaerococcus obesiensis == vaginalis	0.678427	0.0462532	0.0783093	0.152286	0.678755	0.11255	0.0916317	0.0996279	0.694599	0.541892	0.0811277	0.0289569	0.213785	0.438403	0.835884	0.942104	0.422494	0.892013	9.30851e-05
P-value	Anaerofilum sp. An201	0.00618782	1.52741e-07	0.278363	0.139752	0.0141602	1.5709e-08	0.0467997	0.000666454	0.00488488	5.62152e-05	0.0448016	0.143547	0.257755	0.480566	9.49056e-08	0.327166	0.465292	3.04807e-28	0.02059
P-value	Anaerofustis stercorihominis	0.832603	0.0530461	0.0364288	0.0180932	0.69687	0.0560456	0.12617	0.840635	0.543574	0.159642	0.0381498	0.121107	0.242268	0.466098	3.13183e-15	0.311341	0.450589	2.80967e-05	0.0360925
P-value	Anaeroglobus geminatus	0.775631	2.37745e-06	0.234303	0.117634	0.824715	0.386284	0.242878	0.144505	5.16406e-09	0.423972	0.581496	0.553381	0.50615	0.678582	0.4066	0.240707	0.667961	0.208616	0.00748295
P-value	Anaeromassilibacillus sp. An172	7.03941e-20	0.564612	0.867758	0.826619	0.975283	0.903458	0.87013	7.2654e-20	2.73027e-14	0.910873	0.868939	0.87013	0.925843	0.953744	0.907505	0.935773	0.952121	0.796965	0.629645
P-value	Anaeromassilibacillus sp. An250	1.25884e-07	2.55174e-21	9.52435e-27	5.2567e-20	0.0161727	0.00497205	2.22976e-10	0.000317055	0.939022	0.345495	3.58428e-14	3.30629e-07	1.99831e-05	0.106485	8.70119e-10	0.000222158	0.00593595	8.82418e-74	1.16304e-08
P-value	Anaeromassilibacillus sp. Marseille-P3371 & Clostridia bacterium UC5.1-1E11	0.00145076	8.72477e-35	0.0190152	4.38381e-06	0.516294	0.0457933	0.000617336	1.26529e-05	6.92662e-10	0.0149443	0.000549028	0.000617336	0.0513648	0.0109601	4.91335e-07	0.0916194	0.208737	0.945863	1.72472e-192
P-value	Anaerostipes caccae	0.0921475	5.67519e-11	0.0201259	2.43891e-08	0.457687	0.990725	0.000370975	0.663499	6.14627e-16	0.584384	2.72888e-05	0.000938231	0.0180397	0.940148	0.0290676	0.0406195	0.127097	0.0258166	0.00272056
P-value	Anaerostipes hadrus 1	2.53282e-26	1.92858e-40	1.71941e-09	1.93215e-42	0.144552	2.91919e-15	3.56069e-40	0.0619184	1.22079e-05	7.146e-11	2.03373e-15	1.39977e-32	0.0633768	6.07109e-05	5.41285e-16	0.225969	0.763516	2.3148e-57	5.6011e-55
P-value	Anaerostipes hadrus 2	8.97887e-06	8.31644e-21	4.2005e-27	3.88565e-11	0.254659	2.90951e-09	5.5656e-06	0.000376479	5.46779e-11	3.973e-24	0.0338257	0.381099	0.0572205	0.455732	4.90851e-16	0.00306979	0.0273752	4.52675e-29	1.26026e-13
P-value	Anaerotignum lactatifermentans	0.903382	0.473209	0.277622	0.000324909	0.611196	0.931197	0.0602625	0.702059	5.6207e-19	0.944711	0.00681022	0.00733696	0.127004	0.341528	0.457735	0.186427	0.324846	0.666346	0.127455
P-value	Anaerotruncus colihominis	0.0252722	3.39906e-06	1.4766e-06	7.20312e-33	0.0292286	0.690795	6.96472e-17	0.0946305	0.245572	0.178834	4.53349e-23	0.00492586	1.14206e-07	0.47066	0.144978	1.45951e-06	0.00820383	0.000615851	0.00518027
P-value	Anaerotruncus sp. CAG:390	0.225722	2.37815e-07	1.00029e-61	5.72526e-32	0.760588	0.752406	0.00278798	0.225722	0.466484	0.0805945	3.47241e-24	4.07111e-12	5.1504e-30	0.568604	0.0127245	1.02227e-05	0.25335	1.42956e-11	0.0202037
P-value	Anaerotruncus sp. CAG:528	0.355447	0.000615691	0.000767016	0.798941	0.0071006	0.182856	0.524965	0.34581	0.0377594	0.200372	5.89224e-06	0.072561	0.982458	0.00836196	0.654215	0.00018351	0.0121759	6.34781e-26	0.807181
P-value	Atopobium parvulum	2.90881e-13	0.0499502	0.383501	0.251595	0.871078	3.00812e-05	0.736169	0.359843	2.06646e-15	0.557967	0.387802	0.00546439	0.115681	0.761396	0.543123	0.67318	0.753286	0.805634	0.939234
P-value	Atopobium parvulum 2	1.46382e-05	0.17006	0.0591126	0.0174397	0.663381	0.0475241	0.691292	0.00023185	3.77425e-34	0.116119	0.156025	1.62914e-14	0.74051	0.415445	0.694016	0.257975	0.399261	0.797736	0.224378
P-value	Azospirillum sp. 51_20	0.000364431	0.0249224	7.50813e-22	1.04249e-06	0.390505	0.319609	0.000861116	0.00899472	0.0521797	0.0556153	0.000238599	0.00653103	0.0383085	7.22988e-14	0.212627	0.0728921	0.181396	7.71514e-22	0.506425
P-value	Azospirillum sp. CAG:239	0.000229603	6.166e-14	2.33274e-29	0.000397157	0.54282	0.0180185	0.00132751	0.00172326	0.502379	0.0201644	0.00119649	0.00132751	0.067732	0.0001351	6.31462e-05	0.113738	0.238566	3.37927e-21	2.13259e-10
P-value	Bacillus sp. CAG:988	0.452483	0.00108226	0.01821	0.215379	0.860788	0.492715	0.355139	0.448325	0.28474	0.00956173	0.350705	0.355139	0.598592	0.742819	5.80326e-05	0.648546	0.734125	0.467589	3.24444e-30
P-value	Bacteroidales bacterium 52_46	0.316937	9.03736e-08	0.549123	0.547742	0.801258	0.324797	0.184422	0.316937	0.393012	0.36351	0.180393	0.184422	0.449888	0.637664	0.345588	0.51298	0.625901	0.0366711	0.0853342
P-value	Bacteroidales bacterium 55_9	0.49474	0.00314564	5.60041e-09	0.0916634	0.720773	5.96164e-06	0.0594605	0.417708	0.803694	1.37079e-05	0.8036	0.176891	0.404959	0.503661	0.328385	0.352927	0.488798	0.00153633	0.000133801
P-value	Bacteroidales bacterium H1 & K10	0.843192	0.355293	7.07111e-54	0.725242	0.960329	2.11651e-07	0.793063	3.19432e-07	0.000598694	0.857456	0.791193	0.793063	0.881275	0.925835	0.852107	0.897113	0.923238	0.679742	0.439034
P-value	Bacteroidales bacterium H10	0.287394	0.00870434	0.474046	0.177317	0.789017	0.29523	0.158262	0.287394	0.322467	0.334056	0.154448	0.158262	0.421841	0.616615	0.982595	0.486779	0.604296	0.209355	0.621346
P-value	Bacteroidales bacterium H2 / Prevotella sp. CAG:251	0.429487	0.0358881	0.127974	0.492092	0.706214	0.438964	0.143409	0.553691	0.0214575	0.173585	0.0448415	0.0468407	0.257843	0.480648	0.425951	0.327256	0.498507	0.0148259	0.633899
P-value	Bacteroidales bacterium H3	0.29865	0.0848741	0.388568	0.876282	0.672211	0.315166	0.933988	0.0378936	0.0304506	0.126645	0.0243241	0.0256605	0.204048	0.428567	0.353282	0.271483	3.25554e-05	0.00129468	0.508253
P-value	Bacteroidales bacterium H4 & Prevotella sp. CAG:873	0.278235	1.53809e-06	0.000443902	9.49533e-12	0.785063	0.92445	0.472194	0.89854	0.67964	0.324854	5.2336e-07	0	3.11795e-163	0.609862	0.00305897	3.82216e-114	0.158723	0.723156	0.00097779
P-value	Bacteroidales bacterium H5	0.000317183	0.213605	0.719302	0.636369	0.946646	0.79347	0.724172	0.790167	0.683098	0.809079	0.721726	0.724172	0.84077	0.900347	0.000123816	0.861907	0.896867	2.06742e-05	0.537205
P-value	Bacteroidales bacterium H8 & H9 & Prevotella sp. CAG:279	0.0247112	0.042737	0.716422	1.52286e-120	0.332325	0.586226	3.68179e-13	0.0033133	0.0784624	0.889879	6.50547e-53	2.99259e-114	9.85049e-12	0.301668	0.087648	1.28064e-26	0.000319615	3.208e-13	2.23539e-19
P-value	Bacteroidales bacterium M1	0.000194952	0.56919	1.43619e-09	0.64573	0.94812	0.799059	0.731504	0.795841	0.691407	0.814263	0.729117	0.731504	0.845119	0.90309	0.80735	0.865691	0.899705	0.589229	0.311418
P-value	Bacteroidales bacterium M7	0.835114	0.330706	0.778612	0.711513	0.958257	0.837733	0.782516	0.835114	0.00144284	0.850094	0.780556	0.782516	0.875122	0.921971	0.844477	0.89177	0.91924	0.66401	0.013508
P-value	Bacteroides acidifaciens	0.408706	0.0888171	0.264474	0.142077	0.835382	0.416297	0.866802	0.408706	0.204943	0.453156	0.268804	0.273217	0.532772	0.697422	0.436196	0.589147	0.0343128	0.267887	0.847662
P-value	Bacteroides barnesiae	0.633364	0.632534	0.00995648	0.3967	0.904503	0.638845	0.527003	0.0997432	0.464281	0.664931	0.523188	0.527003	0.718737	0.822384	0.0717661	0.00358864	0.816257	0.0138317	0.259548
P-value	Bacteroides caccae	2.73953e-07	0.389656	0.792555	7.95383e-23	0.42314	0.569028	0.337872	0.389342	9.77865e-05	0.0137281	3.31036e-27	2.72194e-07	7.56624e-11	0.582475	0.942597	4.75263e-11	0.478446	0.0548599	4.83025e-05
P-value	Bacteroides cellulosilyticus	6.38524e-05	0.000118262	0.49126	2.53661e-33	0.731501	0.396422	3.28081e-18	0.034188	3.54247e-09	0.336551	2.3481e-24	8.22551e-15	6.93518e-10	0.847891	7.46872e-06	9.77364e-09	0.515916	1.04301e-06	0.147104
P-value	Bacteroides clarus	0.387956	3.38678e-79	0.0432906	2.03107e-11	0.291017	0.0176009	0.000583949	0.0523275	0.0342127	0.0339524	7.50281e-05	4.26994e-06	0.00152498	0.0707018	0.629377	0.006063	0.15251	0.0886321	1.98076e-28
P-value	Bacteroides congonensis	0.593364	7.16271e-06	0.593356	0.000607665	0.598729	0.298199	0.0159565	0.110787	0.363527	0.429739	0.0154991	0.516914	0.114188	0.944371	0.157168	0.35716	0.996444	0.430351	0.0670811
P-value	Bacteroides coprocola	0.0291521	0	0.00301334	6.59488e-21	0.186754	0.000530337	0.0677586	0.70377	0.287272	0.0228455	1.9428e-12	0.0107649	7.37877e-05	0.0039173	0.000435128	0.000600169	0.0472487	5.15434e-09	3.51201e-75
P-value	Bacteroides coprophilus	0.0276196	6.47502e-91	0.470001	5.45704e-06	0.460645	0.197209	0.989724	0.867804	0.00166996	0.0232717	0.000832625	0.0186865	0.0267762	0.732143	0.88973	0.174879	0.891586	0.000813052	8.98743e-18
P-value	Bacteroides dorei	0.00481925	0.0240028	1.48115e-09	2.09829e-42	0.253013	0.131186	0.0103119	0.00094176	2.54027e-05	2.4783e-05	1.67746e-16	1.30985e-09	6.66753e-07	0.162669	8.17367e-05	2.57995e-07	0.468938	4.00391e-08	0.354459
P-value	Bacteroides eggerthii	0.440517	1.48103e-55	0.88113	6.45289e-13	0.174157	0.543168	0.00499703	0.0933342	0.113111	0.494361	1.35773e-10	0.535301	0.0267804	0.0991336	0.839406	0.000412113	0.923848	0.942609	4.76833e-24
P-value	Bacteroides faecichinchillae	0.0677053	5.22688e-42	0.00316409	0.00533952	0.504406	0.825367	0.000403114	0.0242469	0.00117894	0.489058	0.639487	0.000146245	0.662896	0.587836	0.1142	0.0827386	0.0314949	5.98972e-05	1.49186e-13
P-value	Bacteroides faecis	0.220263	7.09936e-19	0.0736535	6.82742e-09	0.540522	0.0542321	0.000133015	8.97748e-12	0.0183012	0.287712	3.74585e-05	0.000376645	0.0486401	0.984884	0.16267	0.0334294	0.396173	0.00335568	5.98172e-47
P-value	Bacteroides finegoldii	0.00112782	2.09375e-45	0.0855911	3.20458e-14	0.117806	0.0563176	3.10469e-06	0.059458	0.000102872	0.970063	3.90378e-10	0.00497317	8.03962e-06	0.429645	0.00359179	4.79577e-05	0.194063	8.77303e-13	9.90161e-07
P-value	Bacteroides fluxus	0.524402	2.31551e-05	0.290828	0.190392	0.852955	0.497144	0.328429	0.518785	0.258222	0.503428	0.323974	5.02263e-11	0.577952	0.728748	0.48737	0.630008	0.719619	0.393414	0.0153306
P-value	Bacteroides fragilis 1	0.00150118	0.00154307	0.070076	1.02652e-30	0.624357	0.921075	3.06685e-05	9.65016e-06	0.0552325	0.545785	1.23345e-10	0.0372925	3.23638e-06	0.0087393	0.00497717	6.4379e-06	0.156489	0.55113	0.0185152
P-value	Bacteroides fragilis 2	0.016174	2.86708e-92	3.25273e-06	5.98969e-05	0.359664	0.00128648	3.34195e-05	0.0193342	7.3073e-05	0.00357784	0.826374	0.0291968	0.813032	0.305077	0.0221395	0.017278	0.870972	0.000345539	1.20334e-29
P-value	Bacteroides gallinarum	0.609069	0.0166914	0.489745	0.363526	0.897651	0.614849	0.497635	0.609069	0.432686	0.642394	0.493666	0.497635	0.699405	0.80981	0.629823	0.738147	0.803267	0.942751	6.55655e-46
P-value	Bacteroides intestinalis	8.56119e-05	1.34618e-128	0.0148843	1.59609e-15	0.0861993	0.00818917	1.12656e-10	0.000182456	3.43017e-10	0.00576543	6.86186e-16	0.0187456	1.16368e-06	0.1544	0.163286	0.0118148	0.0158742	0.055917	4.24296e-39
P-value	Bacteroides massiliensis	0.000256038	1.29957e-53	0.116069	3.83149e-25	0.0729708	0.41595	5.73612e-14	0.759762	0.00176474	0.77194	1.34883e-20	0.183316	7.29656e-08	0.00106316	0.00868028	3.1524e-06	0.190995	2.92603e-10	2.83135e-09
P-value	Bacteroides nordii	5.88533e-08	3.20485e-129	0.00850915	6.88576e-21	0.0789651	0.602523	3.75126e-05	0.0041313	1.67463e-07	0.0250053	6.35531e-12	0.000127407	1.45611e-05	0.767325	0.0233434	4.96457e-06	0.039878	0.00291271	2.68886e-37
P-value	Bacteroides oleiciplenus	0.461958	1.71868e-05	0.287456	0.606414	0.853206	0.469203	0.262279	0.461958	0.826763	0.504166	0.324811	0.329266	0.578609	0.729198	0.488123	0.630599	0.720083	0.393013	0.0530564
P-value	Bacteroides ovatus	1.19148e-14	0.000127827	1.06115e-05	2.90729e-62	0.107006	0.0359691	1.10696e-08	0.00251651	0.00192576	0.380317	1.01668e-44	1.12205e-18	1.17664e-14	0.247319	1.03233e-07	2.4595e-16	0.00155668	0.139371	6.03185e-46
P-value	Bacteroides pectinophilus	0.00162411	1.74311e-11	1.67183e-14	0.251133	0.695883	9.12398e-05	0.0379998	0.833024	0.0170819	0.407124	5.08507e-07	0.0392773	7.22235e-25	0.511497	0.165035	0.309685	0.547181	1.09924e-09	3.05754e-09
P-value	Bacteroides plebeius	4.06138e-07	8.20829e-299	0.000213956	9.85168e-29	0.099573	0.0725519	0.443812	0.108348	0.573261	0.455157	1.07689e-15	0.00118224	2.54256e-06	0.280494	0.000163006	1.86202e-05	0.668883	6.51041e-21	4.18204e-72
P-value	Bacteroides salanitronis	0.898014	0.549268	4.87173e-13	0.819857	0.974302	1.67641e-18	0.865027	4.20955e-18	0.844109	0.907353	0.86379	0.865027	0.92291	0.95191	1.15804e-19	0.933231	0.950223	0.789098	0.61612
P-value	Bacteroides salyersiae	0.000181344	8.51312e-88	0.00733268	1.35364e-17	0.197695	0.302919	0.000163264	0.0192378	0.0195847	0.00015106	3.31659e-11	1.70091e-08	0.000110032	0.598857	0.13551	0.00081369	0.970655	0.000275905	5.37513e-19
P-value	Bacteroides sartorii	0.338331	0.000666422	0.19593	0.274489	0.809688	0.346171	0.204146	0.338331	0.141811	0.384641	0.199991	0.204146	0.469736	0.652286	0.36686	0.531382	0.640922	0.045617	0.633671
P-value	Bacteroides sp. 43_108	0.376853	1.02877e-16	0.737079	0.116327	0.824099	0.144619	0.241198	0.790061	0.175135	0.422318	0.585709	0.241198	0.504631	0.677498	0.404925	0.563478	0.666845	0.204805	0.00723818
P-value	Bacteroides sp. An19 & An51A & An269 & An279 & CAG:702	0.000156687	0.233082	7.59508e-24	0.650323	0.94884	2.82557e-16	0.735093	0.000153306	0.695479	0.816798	0.732736	0.735093	0.847244	0.90443	5.54277e-05	0.86754	0.901091	3.47169e-06	0.318193
P-value	Bacteroides sp. An322	0.936398	0.709261	0	0.887245	0.984019	0.93742	0.915715	0.936398	0.902555	0.94224	0.914939	0.915715	0.951961	0.970057	0.940051	0.958405	0.969005	0.867729	0.754924
P-value	Bacteroides sp. CAG:1060	0.0570754	0.0420177	0.00288326	1.77811e-07	0.912941	0.668884	0.564299	0.663793	0.504841	0.69307	0.238562	1.18071e-28	0	0.837912	0.0398796	0	0.832304	0.779463	0.0888527
P-value	Bacteroides sp. CAG:1076	0.840594	1.3182e-43	0.129088	0.0458294	0.777466	0.268928	0.536725	0.261167	0.26433	0.307607	0.132575	4.17175e-20	0.396235	0.596955	0.289611	0.462634	0.584137	0.0590129	9.9651e-06
P-value	Bacteroides sp. CAG:144	0.0926288	2.03351e-11	1.62235e-30	0.0131543	0.655078	4.01156e-08	0.0553791	3.98317e-22	1.4604e-16	7.75227e-07	0.0174231	0.0184808	0.179935	1.0764e-15	0.0343113	0.245643	0.386955	4.14496e-101	0.121652
P-value	Bacteroides sp. CAG:443	0.74209	0.016805	1.59456e-44	0.127908	0.829387	4.07759e-19	0.255872	0.391599	0.188687	0.00178158	0.251499	0.255872	0.517732	0.0358856	0.0875323	0.575451	0.676433	5.26047e-10	0.51049
P-value	Bacteroides sp. CAG:462	0.433772	0.756396	2.23624e-06	0.708685	0.862935	0.0199846	0.827336	0.022603	0.934299	1.78177e-05	0.358262	0.362685	0.604301	0.746688	0.0125859	0.653661	0.738114	0.95028	0.649857
P-value	Bacteroides sp. CAG:530	0.228811	4.85447e-11	0.255849	1.51694e-127	0.650542	0.585583	0.24047	0.0716817	0.0174227	0.101967	4.32509e-115	0	2.28471e-83	0.396674	0.0896082	1.41199e-120	4.35236e-05	0.00141992	0.00948982
P-value	Bacteroides sp. CAG:545	0.953633	3.77759e-12	0.073269	1.59708e-128	0.71253	0.983191	0.826448	0.453024	0.0740183	0.0102276	0.00378785	3.10907e-157	1.47219e-24	0.395976	0.167393	5.87317e-109	0.475479	0.000300496	0.58521
P-value	Bacteroides sp. CAG:709	0.924561	5.80568e-13	0.353051	1.2853e-125	0.664836	0.886985	0.0668279	0.0849709	0.0245296	0.239852	1.04642e-20	0	4.95803e-67	0.417596	0.732673	6.98576e-113	2.82493e-05	0.865767	0.23215
P-value	Bacteroides sp. CAG:770	0.106325	1.25398e-08	0.487063	3.77661e-185	0.684608	0.780624	0.736466	0.106325	0.0407943	0.142557	1.48536e-40	0	1.96398e-98	0.447275	0.128012	5.59995e-151	0.00112812	0.000740571	0.000297179
P-value	Bacteroides sp. CAG:875 & sp. 2789STDY5834845	0.49243	0.60251	3.80973e-09	0.222559	0.862919	2.24899e-17	0.362628	0.429527	0.292254	0.53309	0.358204	0.362628	0.604258	0.746658	4.80506e-05	0.653622	0.738084	0.000744144	0.028224
P-value	Bacteroides sp. CAG:927	0.561504	0.130047	0.607872	2.51297e-08	0.883892	0.229117	9.52451e-10	0.241133	0.373042	0.598059	0.437086	0.4413	0.661113	0.784669	0.584241	0.70428	0.0010394	0.567427	0.789037
P-value	Bacteroides sp. Marseille-P3108 & CAG:633	0.398364	0.0576366	0.00018252	0.234653	0.866402	0.379095	0.37507	0.39827	0.319239	0.543646	0.370667	0.37507	0.613563	0.752942	0.528462	0.661947	0.744564	0.000359292	0.00877023
P-value	Bacteroides sp. Marseille-P3166 & CAG:598	0.111647	0.0142569	7.16071e-08	0.136658	0.833145	0.00399097	0.266657	0.107867	0.198765	2.35211e-09	0.262257	0.266657	0.527137	0.69346	0.614967	0.584022	0.68327	0.926122	0.0437734
P-value	Bacteroides sp. Marseille-P3208T	0.795507	0.574502	0.726314	0.645179	0.948033	0.000159455	0.731072	0.795507	0.0206392	0.813958	0.728682	0.731072	0.844863	0.902929	0.807035	0.865468	0.899538	0.588607	0.31061
P-value	Bacteroides stercorirosoris	0.600786	0.00246523	0.556855	0.0205518	0.743097	0.0517064	0.590141	0.596369	0.137145	0.236734	0.244542	0.0839394	0.325192	0.539726	0.219411	0.394317	0.525585	0.47068	0.363893
P-value	Bacteroides stercoris	5.22264e-10	7.85262e-37	1.87601e-12	8.54869e-32	0.0125196	2.30012e-06	2.77663e-14	0.000710794	0.727027	0.0116455	2.27902e-32	6.361e-05	2.07323e-13	0.00389897	7.21744e-09	8.50129e-11	0.42083	6.53955e-17	0.23425
P-value	Bacteroides thetaiotaomicron	2.37242e-12	8.65985e-16	0.00055429	2.1893e-66	0.2699	0.000314418	1.33864e-14	4.71174e-12	0.392788	0.000630801	1.3215e-45	1.38227e-14	2.74145e-17	0.184117	0.000214768	2.99875e-15	0.00547065	2.10393e-05	0.00205858
P-value	Bacteroides uniformis	6.43166e-13	0.969952	0.860617	3.82176e-93	0.281909	0.0836849	2.08389e-23	0.85206	0.956955	0.0574806	7.67923e-56	1.90453e-23	8.90745e-21	0.603431	0.105767	8.9916e-17	4.78786e-05	7.97416e-05	6.52598e-18
P-value	Bacteroides vulgatus	3.48613e-22	0.906146	0.000227834	1.00585e-85	0.951907	0.00118905	1.46875e-22	0.00100459	0.20867	0.00146726	1.6652e-62	2.90948e-30	4.67073e-22	0.643165	4.84267e-08	7.44918e-18	1.33015e-05	1.26576e-17	8.61404e-47
P-value	Bacteroides xylanisolvens	5.58577e-08	5.07427e-30	0.0894173	3.9011e-35	0.579058	0.192342	5.80212e-07	4.34023e-05	0.242934	0.51185	2.55427e-38	6.26088e-10	5.763e-16	0.176815	0.0102833	3.03233e-12	0.0256758	1.18243e-08	0.0853082
P-value	Barnesiella intestinihominis	0.365574	6.26467e-14	1.29159e-19	0.00171983	0.0657404	8.93074e-06	0.0530261	0.000128734	0.030443	0.0721003	1.95563e-08	0.332783	2.22323e-07	7.57847e-05	8.48126e-08	1.72451e-06	0.908894	2.25784e-48	0.0272958
P-value	Barnesiella sp. An22	0.515925	0.493503	0.0075248	0.248365	0.870203	0.344871	0.388935	0.515925	0.318906	0.555276	0.384562	0.388935	0.623783	0.759813	0.540367	0.671074	0.751653	0.0516584	0.502533
P-value	Bifidobacterium adolescentis	1.04997e-13	3.83093e-22	9.2649e-13	9.59655e-25	0.371606	0.00239628	1.92956e-17	4.12775e-09	0.000714509	0.0307041	0.0106949	1.83404e-61	0.262317	0.121945	1.49671e-08	5.23578e-05	0.00369734	3.35512e-24	0.0899518
P-value	Bifidobacterium angulatum	0.153181	3.17831e-10	0.000392643	0.0858331	0.719395	0.0184377	3.7224e-38	0.948535	0.0836128	0.194646	0.173872	0	0.280838	0.501464	0.576528	0.350451	0.486561	0.11345	0.247925
P-value	Bifidobacterium animalis	2.48349e-40	1.89522e-10	0.157202	0.000609221	0.627834	8.42939e-17	0.0325847	0.175982	0.0240122	8.86433e-10	0.0297837	0.616888	0.145611	0.771412	0.00364968	0.2077	0.347801	4.33278e-270	0.00959286
P-value	Bifidobacterium bifidum	0.00124081	0.213769	0.10923	7.21928e-06	0.300101	0.032718	0.00419227	2.78508e-08	0.561993	0.915293	0.000286246	1.54915e-52	0.00830512	0.846764	0.051668	0.00707678	0.0447654	0.000394384	0.420491
P-value	Bifidobacterium breve	0.373398	0.181598	0.069192	0.0582777	0.0398487	0.115443	0.0912916	7.64139e-05	4.94171e-18	1.45698e-06	0.0783155	1.09376e-41	0.681163	0.591202	0.798005	0.273638	0.661241	0.31535	0.405312
P-value	Bifidobacterium catenulatum	1.04235e-10	2.73205e-23	1.49595e-07	0.840998	0.575957	1.62746e-23	1.10689e-74	9.92599e-08	0.24742	1.74689e-15	0.00290807	2.26496e-252	0.705003	0.2891	0.297199	0.989495	0.278725	9.15929e-31	0.0590316
P-value	Bifidobacterium dentium	1.32781e-12	1.07251e-08	0.0305833	0.552652	0.395338	8.44788e-09	0.00493706	2.62485e-05	9.71788e-19	0.00479102	4.63078e-13	9.77487e-19	0.480227	0.111765	0.00510436	0.0271667	0.0997326	3.19166e-14	6.75467e-27
P-value	Bifidobacterium gallinarum == saeculare	7.95301e-06	0.844769	0.666771	0.281704	0.878884	5.14481e-06	0.421704	0.283605	0.352625	0.582245	0.655352	0.421704	0.647362	0.775555	0.568011	0.692071	0.767897	0.66911	0.757828
P-value	Bifidobacterium longum	4.51155e-16	4.33821e-05	0.209689	1.59193e-20	0.187821	2.60956e-07	0.136807	1.15341e-11	7.9389e-12	3.55265e-05	5.66155e-09	9.2643e-28	9.15185e-12	0.79518	6.48906e-08	9.21696e-10	0.0785347	2.52045e-36	4.95765e-24
P-value	Bifidobacterium pseudocatenulatum	0.134323	1.34972e-144	1.61522e-12	0.00314477	0.568684	0.763479	4.53171e-10	0.975439	6.29243e-06	0.0109645	1.44826e-05	5.91718e-08	0.0570914	0.473076	0.000208325	7.59984e-06	0.164215	3.33421e-09	1.37736e-66
P-value	Bifidobacterium scardovii	0.764368	0.161155	0.0298638	0.594325	0.939907	0.768055	0.690984	0.764368	0.0654492	0.785489	0.688274	0.690984	0.820953	0.887821	0.777559	0.844651	0.883909	0.531607	0.00184167
P-value	Bifidobacterium thermacidophilum	0.816316	0.27767	0.753727	0	0.953419	0.819224	0.758042	0.816316	0.721563	0.832953	0.755875	0.758042	0.86078	0.912955	0.826712	0.879309	0.909912	0.627848	0.363491
P-value	Bilophila wadsworthia	2.84627e-10	7.58164e-80	3.61756e-06	3.72796e-14	0.10321	0.834862	7.16277e-08	0.0145248	0.635318	0.863148	3.00867e-08	0.333745	4.80275e-06	0.467486	0.650656	2.02507e-11	0.443479	0.559176	3.23116e-50
P-value	Blastocystis sp. subtype 1	0.721838	0.00125665	2.18885e-05	1.441e-106	0.763495	0.239192	5.67909e-07	0.231586	0.476492	0.871193	6.19928e-12	0.0026646	4.42019e-25	0.573455	0.486723	1.27612e-41	0.23109	0.924162	0.00142138
P-value	Blastocystis sp. subtype 2	0.827641	0.000490215	7.05589e-09	1.21431e-07	0.821062	0.155294	0.167178	0.0118562	0.167679	0.414217	0.00209698	0.605229	9.2383e-68	0.0483762	0.116123	5.65676e-188	0.661357	1.23043e-12	0.319621
P-value	Blastocystis sp. subtype 3	0.307968	0.0022495	0.242098	4.12285e-134	0.650998	0.986793	1.77082e-06	0.222645	0.00577224	0.00220743	4.57048e-08	4.9308e-11	0.0151287	0.693064	0.0900571	1.38315e-29	0.00614392	0.39285	0.00140654
P-value	Blastocystis sp. subtype 4	0.604348	9.53246e-08	6.88513e-20	0.0345629	0.764867	8.99786e-18	0.114769	0.159996	0.0680543	0.00587168	0.111449	0.114769	0.369284	0.00189342	2.18522e-43	0.436963	0.562416	1.02502e-67	0.326266
P-value	Blastocystis sp. subtype 9	0.632232	0.498704	0.0101509	0.395128	0.904187	0.0931328	0.525627	0.632232	0.462793	0.663883	0.521804	0.525627	0.717839	2.15306e-05	0.651954	0.754389	0.815656	0.944602	0.40938
P-value	Blautia hansenii	0.123849	2.51507e-76	2.69217e-05	3.18282e-08	0.434674	0.0489314	3.75816e-05	0.0206186	0.112554	0.00479433	8.95126e-05	0.000109568	0.0190186	0.549951	0.00341537	0.0423165	0.130284	7.6048e-08	3.39563e-09
P-value	Blautia hydrogenotrophica	0.0104175	7.10166e-20	0.0419293	1.76499e-09	0.395506	0.00020239	7.3393e-06	0.000109602	0.0103665	0.011263	6.03317e-06	7.3393e-06	0.0107507	0.0291157	0.0686223	0.0272215	0.0998534	3.24295e-06	1.07646e-42
P-value	Blautia massiliensis	7.28449e-19	0.593055	0.0768362	8.52748e-09	0.0369086	2.64725e-12	1.98137e-25	2.40788e-06	0.165642	1.46623e-19	0.00727304	0.0517387	0.423232	0.0121931	4.7373e-11	0.813885	2.21685e-05	4.00582e-49	2.81907e-09
P-value	Blautia obeum	7.67892e-20	0.0110885	0.00123477	0.91578	0.132854	7.39915e-16	2.5146e-13	1.15081e-06	0.0024057	1.40199e-12	0.00016331	3.21203e-06	0.142438	0.00717802	5.87593e-23	0.580197	0.00298005	8.68889e-37	8.98949e-22
P-value	Blautia producta	7.07917e-11	4.64651e-09	0.613863	0.000635136	0.072239	0.115806	0.0346298	0.0615594	2.62431e-12	0.244341	0.0101163	0.0108272	0.146945	0.365983	0.22541	0.209204	0.349393	0.17453	7.47787e-06
P-value	Blautia producta 2	0.000539644	7.05736e-08	0.0453332	2.28813e-08	0.429926	0.0966092	0.000116986	0.00132765	1.18833e-09	0.189329	2.63044e-05	0.000785142	0.0178129	0.139725	0.56055	0.0402233	0.126346	0.313004	0.00886138
P-value	Blautia sp. 2789STDY5608796 & sp. 2789STDY5608848	3.63431e-08	8.6964e-43	1.3699e-29	8.45995e-60	0.617429	8.11516e-18	0.434492	0.0012945	4.84723e-06	2.97534e-22	3.47987e-48	0.00430291	1.47995e-17	0.00407396	4.95785e-18	0.00192211	0.202915	1.7357e-61	0.0482303
P-value	Blautia sp. 2789STDY5834862	1.21287e-12	5.30423e-53	5.09078e-40	3.29834e-24	0.17534	6.2455e-16	6.37799e-09	1.32749e-09	4.6439e-07	3.18543e-24	5.58387e-07	0.255807	1.65443e-14	0.166734	3.42981e-35	5.26829e-06	0.0202836	2.25803e-94	0.000312318
P-value	Blautia sp. CAG:237	0.826035	3.39524e-222	1.98703e-08	0.16486	0.134784	0.185556	0.00406	0.152467	0.0729982	0.956035	3.50393e-06	5.19786e-05	0.587167	0.979401	0.0821231	0.596799	6.22689e-06	0.000101627	1.32122e-82
P-value	Blautia sp. CAG:257	2.46381e-09	1.45583e-07	0.0117723	3.39162e-17	0.859662	0.156438	1.77178e-09	0.909075	5.8935e-13	0.154647	2.43166e-10	6.75099e-09	0.000361906	0.506472	0.168043	0.00201776	0.0738385	0.854075	3.85593e-23
P-value	Blautia sp. CAG:52 & sp. 2789STDY5834917	0.000313294	1.79077e-23	5.86749e-09	0.00120267	0.0354185	2.7704e-10	2.72085e-24	0.00661347	0.144754	1.16099e-15	0.6891	6.8034e-11	4.5077e-05	0.0184692	1.43475e-13	0.00289939	0.00387352	1.8566e-29	0.000759728
P-value	Blautia sp. Marseille-P3087 / Ruminococcus sp. 2789STDY5608882	9.46414e-11	2.36248e-15	0.00153525	1.39717e-12	0.107026	1.51683e-10	2.63512e-20	3.7624e-07	0.0279307	1.99893e-12	6.78539e-20	3.91791e-10	0.000202731	0.0199574	4.28767e-24	0.0340393	0.000522048	9.10249e-46	4.9525e-61
P-value	Blautia wexlerae	4.01759e-31	9.81758e-08	0.00168053	8.40996e-16	0.00757597	4.9344e-18	8.5782e-29	9.38052e-06	9.35069e-10	2.50956e-21	0.000430934	1.49958e-17	0.142552	0.00534931	1.27177e-17	0.994482	0.000248347	1.89868e-35	7.8582e-20
P-value	Brachyspira sp. CAG:484	0.0464096	0.000495255	1.30022e-10	0.18688	0.851796	0.519525	0.324586	7.07892e-10	0.254443	0.50003	0.32013	0.324586	0.574923	0.726671	2.97887e-07	0.627281	0.717478	0.000280225	0.00350128
P-value	Brachyspira sp. CAG:700	0.251384	6.1626e-06	6.28418e-06	3.68128e-94	0.772966	0.109159	0.128205	0.543949	7.37475e-14	0.29766	1.4256e-31	0.128205	5.53467e-117	0.589351	0.887115	1.97499e-270	1.00581e-06	0.20166	0.0229748
P-value	Butyricicoccus pullicaecorum	0.527072	0.354386	0.0647025	0.0150616	0.73086	0.335717	0.947408	0.104399	1.01532e-11	0.214321	0.0671526	0.215643	0.301812	0.519843	0.197432	0.371328	0.505292	0.840349	0.425218
P-value	Butyricicoccus sp. 2789STDY5834927 / Clostridia bacterium UC5.1-1D1	3.76585e-13	0.749089	0.935453	4.52412e-28	0.0282626	0.000349129	3.17155e-12	9.93183e-08	1.68531e-18	0.039358	1.81457e-16	1.02607e-11	3.57618e-06	0.750815	0.127552	6.01442e-05	0.0312282	5.35431e-11	0.917505
P-value	Butyricicoccus sp. N15.MGS-46 & N54.MGS-46 & K4410.MGS-46	3.07127e-12	5.71334e-61	0.282962	6.51654e-05	0.602558	0.00660676	4.65926e-08	2.45325e-06	8.96729e-09	3.54613e-05	5.04025e-05	0.302084	0.664889	0.0232115	1.39338e-05	0.013263	0.0546373	0.231056	1.38551e-69
P-value	Butyricimonas synergistica 2	0.00359697	0.923556	0.927677	2.75447e-18	0.159501	0.0357634	4.11414e-06	0.0898625	0.104379	0.798531	1.73702e-13	1.94632e-08	2.40495e-05	0.00305109	0.515793	0.000255751	0.733309	6.93199e-07	0.0707529
P-value	Butyricimonas virosa	4.6589e-05	1.34078e-67	0.0360976	1.71914e-07	0.0644843	0.0648178	3.05264e-11	0.282912	3.61081e-05	0.271776	1.30297e-14	0.592083	2.8349e-08	0.926575	0.240912	0.180385	0.41917	0.102923	4.96022e-31
P-value	Butyrivibrio crossotus	0.491122	7.43047e-29	1.50271e-24	9.25681e-255	0.446607	4.75956e-11	0.00260325	0.0245957	1.10244e-05	0.125506	4.60716e-55	2.49659e-92	1.06612e-29	0.329365	8.31489e-09	0.00128463	0.510666	0.000101891	0.288338
P-value	Butyrivibrio sp. CAG:318	0.929475	4.69948e-20	0.000334731	2.65603e-231	0.552465	0.000389227	0.53747	0.330806	0.00092871	0.0437176	1.15969e-59	1.13108e-92	6.76499e-28	0.940981	0.000226445	0.00139505	0.249926	0.8999	0.929519
P-value	Caecibacter massiliensis	0.5391	0.346403	1.44143e-07	3.68656e-13	0.85117	0.0403097	0.967527	0.0461833	0.00047392	0.498203	0.982268	2.73561e-28	0.00232677	0.725552	0.482041	0.625812	0.716325	0.37646	0.0135036
P-value	Campylobacter concisus 2	0.189822	0.144817	0.0816213	0.139913	0.63461	0.0630102	0.039221	0.0588155	4.47732e-17	0.918118	2.37548e-08	0.00176143	0.971336	0.373904	0.0749435	0.216777	0.357361	7.82896e-05	0.0401908
P-value	Campylobacter hominis	0.0981706	0.0289284	0.287564	0.414472	0.588331	0.25312	0.835662	0.0313918	0.0203097	0.381876	0.0121341	0.00430743	0.313551	0.956373	0.1273	0.159516	0.967422	0.233297	0.000364195
P-value	Candidatus Gastranaerophilales bacterium HUM_1 / Clostridium sp. CAG:813	0.141859	0.00513978	0.874514	3.96738e-204	0.711786	0.464408	0.839787	0.141859	0.024188	0.182287	8.32217e-95	2.98128e-13	6.5518e-38	0.489407	0.166246	1.17644e-26	0.000195537	0.0187282	1.4266e-05
P-value	Candidatus Gastranaerophilales bacterium HUM_2 / Candidatus Melainabacteria bacterium MEL.A1	0.327547	0.00713264	0.221181	1.61676e-169	0.683478	0.350255	1.31173e-05	0.105007	0.0128556	0.141052	9.256e-104	1.27083e-16	3.02706e-45	0.445557	0.126574	2.09998e-06	8.08618e-09	0.00589892	4.36613e-06
P-value	Candidatus Gastranaerophilales bacterium HUM_21 / Heliobacterium sp. N15.MGS-306 / Clostridium sp. UNK.MGS-6 & K4410.MGS-306 & CAG:306	0.000374559	1.87326e-12	3.33987e-52	0.0126805	0.656177	0.00274692	0.304601	0.969842	0.0199334	0.350226	0.0178094	0.318837	0.181422	0.00391535	4.93445e-06	0.247254	0.388573	3.21653e-06	1.00552e-16
P-value	Candidatus Gastranaerophilales bacterium HUM_6 & HUM_7 & HUM_12 & HUM_14	0.457735	0.0214917	0.501268	1.67939e-222	0.715529	0.484396	3.42295e-14	0.147351	0.0791895	0.773269	1.77411e-13	4.93472e-05	1.20147e-13	0.495324	0.172075	0.0200584	0.000218948	0.0208436	2.27849e-05
P-value	Candidatus Gastranaerophilales bacterium MH_37 & HUM_20 / Melainabacteria sp. 35_41	0.354127	1.3328e-05	0.215307	0.09963	0.815709	0.181797	0.219108	0.017503	0.155105	0.400145	0.214874	0.219108	0.484168	0.662786	0.144207	0.544695	0.651715	0.143056	5.56948e-33
P-value	Candidatus Gastranaerophilales bacterium x14	3.42361e-07	3.13332e-21	2.60538e-66	9.50843e-06	0.276594	2.71194e-09	0.00438508	0.841201	0.00360239	2.71888e-05	0.000456746	0.00147307	0.0481333	0.0012139	3.29101e-10	0.0870887	0.629521	3.84857e-46	6.7799e-11
P-value	Candidatus Gastranaerophilus phascolarctosicola	0.835429	0.331645	0.77903	0	0.958338	0.838043	0.782927	0.835429	0.749939	0.850381	0.78097	0.782927	0.875362	0.922122	0.844774	0.891978	0.919396	0.664622	0.416397
P-value	Candidatus Methanomassiliicoccus intestinalis	0.373896	2.95555e-05	0.00169419	0.114075	0.823024	0.381642	0.238287	0.373896	0.172469	0.083109	0.233971	0.238287	0.501987	0.675608	1.57933e-07	0.561057	0.664901	0.000254346	2.2505e-17
P-value	Candidatus Methanomethylophilus alvus / Methanoculleus sp. CAG:1088	0.000113604	0.474261	0.000224968	0.000790181	0.86545	0.0161061	0.371643	0.500532	0.332127	0.540751	0.816733	2.30848e-23	0.611014	0.00427034	0.5255	0.0638067	0.742791	0.904893	0.00829524
P-value	Catabacter hongkongensis	0.43328	1.78306e-12	0.0109643	2.2209e-05	0.548761	0.995059	0.00523938	0.222707	0.737364	0.0304073	0.00141242	0.00156265	0.0718671	0.261913	0.769133	0.119142	0.245531	3.51974e-05	4.85135e-06
P-value	Catenibacterium mitsuokai	0.272096	3.11971e-16	0.517592	0	0.595071	0.599846	0.0136732	0.274103	0.0590491	0.0550104	1.55526e-115	1.33427e-175	2.82343e-83	0.924235	0.706899	1.99753e-20	0.303314	0.0100053	0.00848143
P-value	Catenibacterium sp. CAG:290	0.601552	1.32699e-18	0.255816	3.42467e-238	0.393037	0.98618	2.18166e-18	0.0558177	0.196767	0.07843	4.57314e-84	3.24455e-130	3.50754e-52	0.902999	0.792273	3.89599e-21	1.72163e-10	0.684413	0.000237283
P-value	Christensenella minuta	0.00457117	0.00398262	0.537315	7.51939e-06	0.526719	0.000322528	0.00271136	0.95574	0.0147458	0.161612	0.00075139	0.0183529	0.0574007	0.79659	0.44685	0.0999263	0.22021	2.53979e-10	0.0147823
P-value	Christensenellaceae bacterium Phil1 & Clostridium sp. CAG:226	0.705989	1.66947e-07	6.85608e-17	4.9654e-28	0.353504	3.77745e-09	0.179054	0.352731	0.000174267	0.137096	4.56275e-12	2.10145e-59	6.22761e-24	4.67898e-05	1.3272e-07	2.20343e-29	0.248407	5.4067e-29	1.00909e-06
P-value	Christensenellaceae bacterium Phil10	0.682003	0.287407	0.193465	7.72328e-05	0.917921	0.686852	0.58687	0.682003	0.529604	0.709866	0.583415	0.58687	0.757049	0.847098	2.12267e-14	0.788819	0.841799	0.000825248	0.471465
P-value	Citrobacter freundii	0.448751	2.77356e-76	0.00402701	1.834e-07	0.427903	0.209953	0.00240358	0.0422396	0.754999	0.469476	0.102849	0.00193008	0.0173176	0.428235	0.531255	0.127931	0.159595	0.00421314	6.563e-25
P-value	Citrobacter koseri	0.292338	0.00480085	0.154941	0.844939	0.791119	0.959724	0.510214	0.372671	0.0193222	0.339009	0.427386	0.512101	0.426591	0.620213	0.320997	0.491233	0.607988	0.822587	0.0414094
P-value	Citrobacter werkmanii	0.416532	9.06017e-49	0.875252	0.14882	0.838077	0.424079	0.281262	0.416532	0.212566	0.460693	0.276835	0.281262	0.539597	0.702204	0.443853	0.595347	0.692274	0.0898915	0.00554691
P-value	Cloacibacillus evryensis	0.0521186	0.0719799	0.835875	0.00465043	0.625216	0.797344	0.00999072	0.0521186	0.176868	0.576081	0.0298206	0.348702	0.142568	0.75671	0.612674	0.204259	0.344141	8.73925e-08	0.0365265
P-value	Cloacibacillus porcorum	0.00441909	3.5048e-147	0.00781345	0.513927	0.421408	0.603591	2.21405e-05	0.0150528	0.0121208	0.0353563	0.0163042	0.000215262	0.0157999	0.924392	0.321494	0.0366576	0.388017	0.00136429	4.05069e-25
P-value	Clostridia bacterium UC5.1-1D10 / Clostridium sp. CAG:505 / Firmicutes bacterium CAG:466	0.438791	1.91694e-16	0.0901143	6.79636e-07	0.482768	0.0204183	0.00021336	0.265437	0.438817	0.0971546	0.000186241	0.00206157	0.0351262	0.727156	0.0659028	0.0681339	0.174057	5.10524e-05	2.71933e-106
P-value	Clostridia bacterium UC5.1-2E3	7.86031e-08	5.83714e-23	8.45098e-14	4.40877e-07	0.409882	0.0133635	0.00507714	0.0227688	0.00031302	0.350522	0.000144984	0.000166819	0.0321844	0.000238234	1.84693e-08	0.0636526	0.166972	2.61638e-42	1.95225e-18
P-value	Clostridiales bacterium 1_7_47FAA & VE202-28	0.000483128	0.0442927	0.299687	2.36762e-11	0.310346	0.291097	0.000392201	0.1473	6.12152e-05	0.00191869	6.48711e-08	0.0145913	0.00232226	0.38971	0.859202	0.00837044	0.993968	0.00829091	0.000249047
P-value	Clostridiales bacterium 41_21_two_genomes	1.83084e-08	1.67703e-09	3.15476e-11	3.04877e-12	0.667715	1.33086e-07	1.58843e-11	0.641741	0.0273706	6.72164e-05	3.99234e-127	0.377985	1.77501e-20	0.421865	0.020645	0.000417349	0.640471	3.84991e-10	0.284708
P-value	Clostridiales bacterium S5-A14a	0.630356	0.487022	0.515721	0.392527	0.903661	0.635875	0.523347	0.104558	0.511624	0.662144	0.519511	0.523347	0.716351	0.820836	0.0764188	0.753079	0.814658	0.231541	0.434359
P-value	Clostridiales bacterium UBA643	1.46752e-05	1.42825e-10	0.0795821	1.924e-102	0.600129	0.000822613	0.0173195	0.121937	0.224473	0.908098	3.34061e-81	4.23729e-115	1.05798e-52	0.0205724	0.777574	1.15939e-76	0.022893	0.6091	0.00192751
P-value	Clostridiales bacterium UBA644	0.520035	0.215228	1.74909e-07	0.000243392	0.87146	0.337921	0.393587	0.34732	0.958767	3.47871e-06	0.389225	0.733803	0.627178	0.00256884	0.00573709	0.674103	0.754001	0.79752	0.0117218
P-value	Clostridioides difficile	0.588352	0.0255355	0.464782	0.336219	0.891718	0.594375	0.472901	0.588352	0.406334	0.117159	0.468816	0.472901	0.682803	0.79895	0.609993	0.723486	0.79205	0.850709	0.449502
P-value	Clostridium asparagiforme == lavalense	0.00365355	2.41056e-31	0.0872003	3.43607e-30	0.240203	0.509949	3.01244e-10	0.220265	4.49647e-06	0.971315	3.51328e-19	0.167858	4.72749e-07	0.137234	0.533488	1.29713e-05	0.0934571	0.00200338	6.16353e-08
P-value	Clostridium bolteae	0.0282663	1.91414e-99	2.25309e-07	1.17194e-43	0.034789	0.989851	6.46741e-13	0.73593	1.52158e-24	0.00696059	2.78005e-30	0.00162039	6.08311e-10	0.520815	0.00906741	1.93949e-08	0.0442647	2.57199e-08	7.68128e-35
P-value	Clostridium butyricum	0.273442	7.4926e-15	0.44043	0.175263	0.782961	0.888253	0.986727	0.273442	0.408577	0.320023	0.446469	0.146369	0.408309	0.606281	0.957777	0.474047	0.593697	0.0222132	0.000804315
P-value	Clostridium celatum	0.575689	0.538669	0.256396	1.22724e-11	0.654328	1.40314e-05	0.0576091	0.993359	0.954928	0.744514	1.12933e-08	0.0540442	0.568474	0.402171	0.000529648	0.244547	0.00586515	4.54165e-16	4.37994e-05
P-value	Clostridium citroniae	0.00326765	1.5662e-122	0.00569824	4.82374e-28	0.0399845	0.700121	2.97639e-11	0.032573	1.02146e-07	0.411152	6.45206e-20	0.0161058	1.86271e-06	0.606329	0.042791	1.77211e-06	0.460725	4.21523e-09	2.93722e-45
P-value	Clostridium clostridioforme 1	0.264687	0.00780373	0.692607	1.20264e-10	0.0414701	0.775244	0.0242892	0.104648	2.66208e-19	0.100855	5.82681e-07	0.630338	0.00486095	0.687129	0.051094	0.014765	0.0692531	0.550895	0.10761
P-value	Clostridium clostridioforme 2	0.00233885	0.531668	0.568515	0.315003	0.886896	0.577952	0.453288	0.571742	0.122366	0.607627	0.44912	0.537974	0.669409	0.790144	0.594069	0.711633	0.782956	0.781553	0.432297
P-value	Clostridium disporicum	0.000519391	0.184645	0.0192674	0.0200962	0.74179	0.000443871	0.0823181	0.586586	0.00101251	0.153737	1.10914e-09	0.2487	0.322646	0.304483	2.29402e-22	0.391827	0.324024	1.10821e-19	0.000147223
P-value	Clostridium glycyrrhizinilyticum	5.20014e-06	2.1063e-09	0.00131793	1.7816e-21	0.362597	0.201052	2.19424e-11	0.577331	0.00017079	0.794458	9.28657e-13	5.49949e-09	5.79273e-05	0.320361	0.638998	0.000499178	0.101306	0.895342	0.119401
P-value	Clostridium hylemonae	0.730358	0.231611	0.269268	0.0253744	0.00302682	0.205564	0.0952631	0.208446	0.169293	0.253405	0.0922387	0.0952631	0.342269	0.55389	0.738625	0.410937	0.540058	0.0124928	0.124641
P-value	Clostridium innocuum	3.81862e-08	2.28912e-16	3.00353e-06	4.13991e-20	0.00521647	0.0115588	9.84806e-12	0.833677	5.68836e-06	0.665208	2.15159e-15	0.000116843	3.46551e-05	0.989055	0.213654	0.00011071	0.152079	9.3583e-06	1.02519e-09
P-value	Clostridium jeddahense	1	1	1	1	1	1	1	1	1	1	1	1	1	1	1	1	1	1	1
P-value	Clostridium leptum	0.0132353	3.53052e-42	0.753781	7.67916e-36	0.871574	3.4495e-06	1.30116e-24	0.0669084	0.0981676	0.461392	1.97892e-26	1.82262e-06	3.72758e-09	0.690006	4.42085e-11	0.000304178	0.000295307	7.71894e-22	7.64433e-57
P-value	Clostridium methylpentosum	0.0641633	0.0283162	0.970547	0.0189899	0.739933	0.0625515	0.0800573	0.790479	0.320986	0.230799	0.0773029	0.241361	0.31905	0.53456	4.32765e-06	0.388305	0.52031	3.31193e-11	0.201716
P-value	Clostridium neonatale	0.459126	0.555479	0.317374	0.0050779	0.852287	0.466393	0.326212	0.459126	3.43968e-08	0.501469	0.971163	0.326212	0.576206	0.727551	0.485372	0.628436	0.718385	0.122287	0.374113
P-value	Clostridium paraputrificum	0.106448	0.958428	0.877813	0.0866201	0.102906	0.511454	0.0185512	0.558292	1.03075e-08	0.0456887	0.0262602	0.0460843	0.115367	0.881088	1.63744e-07	0.172816	0.309708	6.62103e-06	0.00342781
P-value	Clostridium perfringens	0.335832	9.75632e-40	0.000798025	1.34051e-07	0.346884	0.299853	0.00110195	0.0360532	0.197835	0.217151	3.59124e-63	1.76077e-05	0.449512	0.168512	0.114959	0.331242	0.00480469	1.80475e-06	4.96569e-20
P-value	Clostridium phoceensis	0.855509	2.14552e-32	1.51609e-16	7.77255e-47	0.902711	6.58188e-05	2.70036e-19	2.69495e-17	1.39715e-17	0.000328491	3.59755e-38	0.362179	7.84135e-14	0.452289	1.23323e-11	1.98632e-10	0.00278132	3.93775e-13	5.45314e-32
P-value	Clostridium saccharolyticum 2	0.0488706	0.76064	3.69764e-07	9.32719e-08	0.452013	0.035246	0.00118042	0.137995	0.0030313	0.00412212	3.16804e-05	0.000107462	0.018992	0.000893852	0.248007	0.0422706	0.417021	0.00888495	0.896688
P-value	Clostridium saudiense	0.00160744	0.173723	0.14174	1.23256e-14	0.117698	0.00016578	0.000145696	0.886293	0.00534395	0.000372389	2.90519e-52	7.36717e-07	0.406233	0.625352	4.67276e-16	0.142888	0.135371	8.7073e-44	3.00446e-23
P-value	Clostridium scindens 1	0.00519485	0.00136936	0.192485	0.00327475	0.677388	0.0974018	0.474906	0.351422	4.74958e-11	0.000840643	0.0268121	0.229212	0.211726	0.43634	0.0801601	0.279591	0.420404	0.0754802	0.000731373
P-value	Clostridium scindens 2	0.0378908	8.9088e-22	0.000202519	1.62005e-12	0.692713	0.00781439	6.21297e-07	0.740546	0.639655	0.852681	3.06507e-08	4.99502e-05	0.00180667	0.199543	0.281022	0.00690425	0.0441172	0.00980119	4.84894e-08
P-value	Clostridium sp. 26_22	0.691159	0.00878201	5.02695e-12	0.00153534	0.423306	0.397589	0.000564834	0.0143169	0.000115609	0.522121	0.00260244	0.0260991	3.84328e-07	0.477892	0.00868015	0.160431	0.665691	0.0029392	1.51063e-05
P-value	Clostridium sp. 2789STDY5608793	6.72755e-05	9.33527e-06	2.16291e-08	7.20738e-36	0.990117	0.133242	1.87598e-06	0.0150624	5.25902e-07	0.000650957	0.417164	2.76906e-44	0.393361	0.862011	0.382335	2.11388e-16	0.33403	0.000258845	1.40137e-11
P-value	Clostridium sp. 2789STDY5608831	1.11672e-05	1.01969e-11	8.55932e-19	5.24463e-19	0.25314	3.9734e-06	3.10605e-08	0.729053	0.000810873	2.12004e-07	0.0221778	0.341394	2.07679e-09	0.446928	2.2295e-21	2.4917e-19	0.000440635	3.15524e-23	0.710626
P-value	Clostridium sp. 2789STDY5608884	0.00915983	4.35287e-21	1.53435e-22	4.86216e-47	0.112819	0.0286758	7.01052e-07	0.0360486	1.30194e-05	0.0712556	2.66932e-23	5.06131e-21	2.41329e-14	0.991849	0.000190561	2.07347e-17	0.0103685	0.15312	0.0173268
P-value	Clostridium sp. 2789STDY5834874 & sp. 2789STDY5608885	0.00620486	4.02385e-08	1.22988e-22	8.93247e-11	0.0407022	2.45645e-06	0.0753157	0.00191856	3.11456e-05	1.89508e-08	0.267127	5.04794e-29	0.955622	0.727951	2.42135e-07	5.31139e-05	0.0014222	0.205156	0.351672
P-value	Clostridium sp. 2789STDY5834920	4.2418e-07	1.70997e-13	8.41841e-17	0.000115639	0.585655	0.0424977	0.00403723	0.682047	0.0214479	0.788418	0.00370936	0.00403723	0.101751	0.239905	1.31079e-23	0.15654	0.291073	2.2838e-12	2.57857e-18
P-value	Clostridium sp. 2789STDY5834924	1.40151e-06	1.54702e-27	4.30834e-12	2.43911e-15	0.719403	0.688218	1.90819e-06	0.116787	4.2614e-11	0.00101406	0.0265186	7.17187e-09	0.0623861	0.092352	0.861112	0.0441515	0.000519699	1.68731e-14	5.80012e-29
P-value	Clostridium sp. 27_14	0.558635	0.263051	4.42851e-06	8.0639e-06	0.38852	0.437362	0.000133361	0.783715	0.0267879	0.0180629	0.852813	0.515709	0.37442	0.565688	0.000664994	0.259691	0.746674	0.567992	0.0189629
P-value	Clostridium sp. 28_12 & CAG:356	0.00507335	0.315076	4.72659e-20	0.66495	0.52322	0.0169315	0.369458	0.412323	0.0705448	0.194619	0.12808	0.0061101	0.0166691	0.104787	0.211328	0.135509	0.719843	9.38362e-05	0.106862
P-value	Clostridium sp. 28_17 & CAG:470	0.00047207	2.5264e-06	3.34489e-10	4.15405e-11	0.546033	0.0549609	0.137775	0.284164	0.00174913	0.228396	2.80881e-06	0.830973	0.0761351	0.0611224	8.71877e-06	1.04831e-10	0.24232	9.92126e-05	0.202681
P-value	Clostridium sp. 29_15 & CAG:265	9.97245e-09	0.446661	0.0736364	2.04942e-19	0.393296	2.34839e-07	0.0733755	0.879296	0.00312129	0.000283897	3.16916e-75	0.520118	3.66389e-16	0.000158413	3.54062e-09	1.39539e-16	1.12034e-08	8.72009e-21	2.91454e-13
P-value	Clostridium sp. 42_12 & CAG:75	0.546734	0.000973593	2.26998e-09	5.12906e-19	0.354785	0.000557087	2.9272e-10	0.951848	3.38429e-11	0.00634506	0.731829	0.934037	1.57133e-05	0.00172302	8.54027e-07	0.298666	0.00684451	1.37176e-07	6.35963e-05
P-value	Clostridium sp. 44_14 & CAG:277	0.677148	0.00266585	7.09111e-11	1.57281e-21	0.520602	0.573122	0.875803	0.440838	0.000921537	0.0203792	1.8272e-25	2.61389e-09	0.0619802	0.0980981	0.467617	1.0622e-15	0.117893	0.385874	1.59324e-10
P-value	Clostridium sp. 7_2_43FAA	0.829275	0.0542658	0.221811	0.000126022	0.820024	0.373488	0.596221	0.365713	6.59544e-05	0.68086	0.181827	0.230289	0.494643	0.670342	0.742049	0.554323	0.659485	0.443584	0.0168448
P-value	Clostridium sp. AT4	0.0304447	1.53611e-11	2.99284e-06	1.10984e-24	0.161771	0.91954	2.81665e-11	0.140141	0.164097	1.42527e-05	6.72092e-15	3.87072e-10	1.15772e-05	0.702604	7.40504e-05	0.000146731	0.141277	1.68175e-07	0.1364
P-value	Clostridium sp. CAG:1000	0.668719	0.0453311	2.99261e-41	0.447078	0.914293	0.673746	0.570387	0.668719	0.511505	0.697616	0.223752	0.570387	0.746633	0.840405	2.24497e-36	0	0.83488	0.751368	0.830079
P-value	Clostridium sp. CAG:1013	0.0726936	5.02385e-08	0.905073	0.160146	0.842407	0.436744	0.294505	0.429272	0.0254056	0.472932	0.290061	0.294505	0.55064	0.709903	0.542804	0.605356	0.700202	0.0989454	0.0268589
P-value	Clostridium sp. CAG:1024	0.628227	0.0168132	0.000125816	0.00122083	0.842684	0.43756	0.295366	0.430094	0.226049	0.47372	4.19302e-82	0.366006	0	0.710396	7.4544e-10	0	0.70071	0.304021	0.0832874
P-value	Clostridium sp. CAG:1193	0.774278	0.67561	2.05983e-09	0.235538	0.826552	0.00651182	0.789793	0.383653	0.181331	0.428923	1.71711e-09	0.781333	7.33618e-18	0.681816	0.675655	6.70038e-11	0.671288	0.0638425	0.0804093
P-value	Clostridium sp. CAG:1219	0.0843881	0.0301904	0.312034	2.55633e-10	0.907234	5.76028e-05	0.293124	0.643152	0.477212	0.673993	7.49761e-06	0.53894	0.0109856	0.827405	0.662374	2.26314e-39	0.821445	0.333585	0.297192
P-value	Clostridium sp. CAG:127	0.00474759	6.75547e-07	3.3622e-07	8.13902e-25	0.466493	0.560418	0.0018262	0.00673317	9.32355e-05	0.290551	1.59686e-13	2.80606e-15	0.0220564	0.856702	0.135728	0.0783047	9.5898e-07	0.000723184	1.44651e-12
P-value	Clostridium sp. CAG:138	0.305966	1.57352e-07	3.82009e-16	1.9704e-19	0.162621	5.40639e-10	0.999555	0.77043	2.28642e-05	0.238255	4.8968e-05	2.0034e-22	3.80895e-08	0.000544207	2.22735e-20	3.20311e-11	0.632585	3.02358e-26	0.000177308
P-value	Clostridium sp. CAG:167	1.13315e-05	4.12681e-40	6.67344e-37	4.57034e-08	0.40983	0.00627978	0.00281151	0.122492	8.18082e-06	0.0121594	0.0024077	0.103858	0.0634144	0.294739	5.92675e-30	3.76032e-19	0.134757	1.77721e-21	3.63894e-73
P-value	Clostridium sp. CAG:169	0.00052495	1.98204e-22	0.491988	3.73516e-13	0.28339	3.42683e-05	1.48623e-08	0.0265571	1.91346e-05	0.165466	1.09183e-08	0.854911	0.00127984	0.0273396	0.000244164	0.00530123	0.037748	4.50012e-14	3.52417e-39
P-value	Clostridium sp. CAG:217	0.315012	7.32886e-05	0.513596	1.81539e-08	0.136199	0.000290358	8.72276e-05	0.847475	6.90461e-05	0.000918416	9.49623e-08	5.6726e-11	6.40829e-08	0.36656	4.07693e-06	1.43328e-05	0.0611712	1.58172e-26	2.73466e-27
P-value	Clostridium sp. CAG:221	1.41416e-06	0.996475	0.0272398	7.96753e-54	0.700994	3.8272e-07	0.921773	0.59885	0.000327354	1.87484e-09	1.00338e-58	0.030198	2.73217e-28	0.308318	5.27383e-12	2.66996e-09	2.62436e-07	3.72397e-28	3.35567e-21
P-value	Clostridium sp. CAG:230	0.617256	2.3611e-36	0.754909	0.000207641	0.954682	0.000130418	0.339765	0.58938	6.20371e-05	0.960063	0.0252545	0.00335115	0.52912	0.697403	0.000712723	0.00591934	0.22866	0.357654	7.5305e-25
P-value	Clostridium sp. CAG:245	0.924422	0.0416144	7.49577e-17	2.2112e-05	0.786791	0.41504	0.0686744	0.220391	6.20794e-08	0.459567	2.89499e-15	1.48103e-05	0.0109456	0.113621	2.68369e-06	0.0620303	0.139	2.79459e-05	0.0279343
P-value	Clostridium sp. CAG:253	0.00187375	0.805078	1.39091e-16	0.415101	0.433587	1.89113e-05	0.0514963	0.561618	0.000164903	0.399732	1.50059e-20	0.000428074	5.55762e-06	0.824633	2.23129e-05	1.01791e-13	0.931964	0.731778	0.0289302
P-value	Clostridium sp. CAG:269	0.823617	0.0157225	6.5495e-11	7.80958e-22	0.280297	0.0785823	0.215464	0.0951987	4.51602e-07	0.00503169	3.2847e-07	0.12922	1.84102e-09	0.432384	0.00059842	4.13329e-10	0.897503	0.3947	0.257502
P-value	Clostridium sp. CAG:273	2.61172e-09	1.86368e-29	2.04241e-60	7.00964e-06	0.525342	1.70441e-08	0.000807265	0.00305832	0.381674	0.598964	0.000721316	0.0158505	0.0565752	0.00957786	5.89833e-32	0.0988014	0.218677	4.41547e-20	2.73397e-36
P-value	Clostridium sp. CAG:288	0.603165	3.11472e-12	1.27346e-37	0.000280377	0.60742	7.29698e-05	6.78119e-06	0.323255	0.0153312	0.858482	3.82679e-10	0.102205	0.123023	0.336432	3.51598e-12	0.0125653	0.319741	2.84808e-43	0.0911329
P-value	Clostridium sp. CAG:299	0.000612142	2.30229e-69	0.00266267	3.35029e-15	0.816098	0.016501	7.95016e-09	0.00273574	0.0307544	0.0161902	1.8517e-09	4.39978e-06	0.000709128	0.675707	0.00148191	0.00337377	0.723791	1.85135e-08	1.16638e-10
P-value	Clostridium sp. CAG:302	0.151393	0.000183902	4.64001e-07	0.589732	0.99428	0.0102575	0.900137	0.334299	0.000167329	0.0139082	0.15367	0.335978	1.21565e-07	0.4785	0.341659	0.192162	0.710431	0.0534784	0.000132132
P-value	Clostridium sp. CAG:307	0.680425	1.25763e-17	1.89564e-30	0	0.613762	1.44597e-07	0.174049	0.351704	0.00206908	0.00055061	4.32198e-161	0.00777126	3.13755e-28	0.85137	0.0088627	0.589044	0.328339	0.000905988	0.00218718
P-value	Clostridium sp. CAG:343	0.344987	0.0335153	2.66005e-08	0.355282	0.479241	2.34632e-05	0.00453352	0.267971	0.0156844	0.185888	2.16567e-07	0.744575	6.5181e-09	0.213043	3.14579e-15	0.584438	0.575173	7.52795e-18	3.6705e-10
P-value	Clostridium sp. CAG:349	0.393767	4.69773e-16	5.80644e-11	1.42831e-126	0.478812	2.71847e-05	0.319387	0.120413	0.00130312	0.548672	4.46902e-25	6.44337e-178	5.77676e-52	0.244409	1.55214e-10	1.30032e-50	0.598546	0.0434077	0.0508277
P-value	Clostridium sp. CAG:352 / Ruminicoccus sp. 2789STDY5834969 & sp. 2789STDY5608859	0.0804326	0.595006	0.0741026	0.799102	0.428776	0.0171926	0.0128973	0.178357	0.00800736	0.212624	2.33878e-05	9.58483e-05	8.60077e-09	0.447143	0.0217041	0.590884	0.125403	4.91463e-13	0.0548027
P-value	Clostridium sp. CAG:354_28_25	0.0396688	4.65799e-24	1.93875e-64	0.000548437	0.597046	0.626989	0.00530002	0.00266863	0.00411665	0.0389849	0.00489234	0.00530002	0.11253	0.000591132	2.65654e-10	0.542021	0.305913	6.232e-19	2.03942e-47
P-value	Clostridium sp. CAG:389	0.615611	7.62689e-07	2.05079e-08	7.16588e-06	0.521014	0.157505	0.0776103	0.0814999	0.000821331	0.919909	8.05383e-07	0.0214395	0.177492	0.482981	0.0898085	0.170146	0.00162232	0.957276	6.19183e-09
P-value	Clostridium sp. CAG:411	0.0385628	0.000228939	3.22165e-62	0.552572	0.801695	0.325885	0.00924167	0.318026	0.125501	0.364589	0.181375	0.18541	0.560215	0.63842	3.55088e-19	0.513928	0.626678	0.000851941	0.0770569
P-value	Clostridium sp. CAG:413	0.173461	0.000508709	1.81649e-20	5.0692e-25	0.732078	0.0824056	0.265578	0.547684	0.639307	0.192242	7.04068e-42	7.00403e-09	2.40656e-142	0.0117316	0.0052786	5.69658e-71	0.390591	9.78327e-08	0.000141248
P-value	Clostridium sp. CAG:417	0.0196232	0.00418479	0.260306	2.21528e-06	0.44375	0.336917	0.513477	0.0226452	9.2018e-05	0.572556	0.853567	0.0804484	0.111242	0.151872	0.722661	0.0465344	0.498755	0.0337101	0.0126449
P-value	Clostridium sp. CAG:43	1.38558e-05	1.18882e-115	0.0473457	1.11501e-07	0.549146	0.406305	4.75668e-22	0.00305911	0.0399896	0.4706	5.45137e-10	5.54408e-11	5.43731e-05	0.48409	0.586932	0.279504	0.0189453	8.57008e-13	1.01615e-78
P-value	Clostridium sp. CAG:433	0.494436	0.125031	0.00695529	1.56433e-132	0.434259	0.530703	2.64834e-07	0.201128	5.82158e-05	0.0165807	5.01153e-99	0.000206925	1.97931e-37	0.518761	0.167474	0.000185502	0.613628	0.00167179	8.42171e-15
P-value	Clostridium sp. CAG:440	0.655444	0.150686	0.0588732	0.519484	0.546075	0.964374	0.00445487	0.867021	0.111134	0.0892869	0.0268506	0.0664273	0.97174	0.0040791	0.483717	0.116677	0.242369	1.58265e-10	0.00293772
P-value	Clostridium sp. CAG:448	0.937712	0.00161143	2.00047e-17	1.15507e-13	0.806986	0.231851	0.267546	0.331382	0.136129	0.377794	7.48257e-43	0.19767	6.89666e-104	0.647589	0.000403823	6.67824e-66	0.636096	0.0187357	0.131779
P-value	Clostridium sp. CAG:451	0.835207	0.395879	4.10565e-05	1.68461e-05	0.579435	0.173037	0.232567	0.223953	0.0830744	0.394262	9.01245e-50	3.18767e-07	4.07648e-23	0.952882	0.302202	4.82323e-24	0.96699	0.791283	0.00246335
P-value	Clostridium sp. CAG:452	0.986311	5.92467e-06	1.75246e-07	2.53475e-39	0.603026	0.101732	0.696608	0.310198	0.421564	0.0434416	8.16586e-08	2.29689e-12	6.41321e-34	0.218136	0.182824	2.72225e-32	0.313848	0.000140459	0.0935098
P-value	Clostridium sp. CAG:465	9.25741e-08	4.91377e-05	1.22208e-13	2.33607e-10	0.702691	0.0427887	0.264419	0.12913	0.0609696	0.168233	3.99403e-32	0.0341334	8.0208e-66	0.000180175	0.0242237	0.00191232	0.531248	0.302657	0.997394
P-value	Clostridium sp. CAG:508	0.0307721	3.55223e-09	2.91371e-36	0.0208073	0.679027	0.333742	0.220869	0.376851	0.0341846	0.0498516	6.38832e-07	0.0096928	7.24593e-26	3.32532e-06	1.86148e-18	1.5565e-35	0.0791843	1.76261e-23	0.701914
P-value	Clostridium sp. CAG:510	0.0498524	0.00116291	0.495695	1.59027e-160	0.621824	0.437032	5.40877e-06	0.0498524	0.00261055	0.223352	4.01292e-143	6.57135e-66	3.0823e-88	0.35606	0.19246	1.40593e-84	6.38386e-09	0.00110547	1.73427e-07
P-value	Clostridium sp. CAG:524	0.954382	2.44463e-05	3.95791e-41	5.01738e-18	0.794938	0.999963	0.100121	0.969479	0.112858	0.213513	3.48546e-06	1.24087e-24	1.67561e-91	0.626769	0.0307555	3.48722e-30	0.127849	2.74554e-13	0.0205178
P-value	Clostridium sp. CAG:533	0.562897	1.63993e-10	1.013e-39	5.52847e-33	0.733981	0.827735	0.0866029	0.176658	0.118115	0.219898	3.91872e-35	6.12071e-05	1.42441e-74	0.524888	0.000305544	3.9273e-17	0.510439	1.88608e-79	0.000598924
P-value	Clostridium sp. CAG:557	0.839347	1.96819e-05	6.91919e-107	1.93567e-11	0.819252	0.0111988	0.720083	0.363622	0.163345	0.409427	0.702319	0.182407	0.0227917	0.668987	2.09093e-10	0.552594	0.0667453	1.2959e-47	0.0157363
P-value	Clostridium sp. CAG:567	0.673193	0.760476	9.05001e-06	0.211756	0.605444	0.908555	0.657349	0.315996	0.0131821	0.0621888	0.716058	0.0451047	0.0124601	0.911548	0.00230551	0.179405	0.968401	4.55318e-07	0.0869924
P-value	Clostridium sp. CAG:568	0.67029	3.03892e-12	0.636737	0	0.610942	0.862486	1.11737e-39	0.698995	0.00190483	0.538912	5.18271e-127	1.16645e-92	0.00791801	0.192111	0.04326	0.186114	0.324502	0.0180779	5.58201e-07
P-value	Clostridium sp. CAG:571	0.468841	0.00090408	0.218053	4.33059e-66	0.713954	0.0301009	0.760699	0.00485437	0.078626	0.185753	1.45747e-11	0.0532477	5.43618e-20	0.417484	0.00186408	0.899736	0.474351	2.64918e-11	0.00325171
P-value	Clostridium sp. CAG:575	0.135401	0.214932	3.25592e-07	0.000123112	0.716868	0.490025	0.0558354	0.99498	0.0269285	0.190481	9.13414e-37	0.409971	1.11099e-20	0.497448	0.878481	0.0216455	0.482471	0.000567511	0.0109465
P-value	Clostridium sp. CAG:58	0.105246	4.34292e-20	0.0114683	2.75194e-30	0.417909	0.166976	3.46356e-20	0.0241043	0.024308	0.983997	1.54805e-20	0.00721894	1.72522e-07	0.00724508	0.00109541	6.04609e-06	0.00651133	3.36544e-08	2.34731e-46
P-value	Clostridium sp. CAG:590	0.610142	5.08307e-08	0.0161382	1.19538e-274	0.740945	0.615903	0.0812832	0.18871	0.0437017	0.232686	1.68844e-196	2.70181e-39	3.58418e-117	0.53621	0.646318	1.39163e-28	0.521995	0.385779	4.01294e-05
P-value	Clostridium sp. CAG:594	0.72898	0.892639	0.000470961	1.74413e-62	0.677236	0.335414	1.92119e-08	0.296249	0.0110932	0.907885	3.70487e-57	0.0281618	0.000192501	0.436111	0.243218	7.53675e-18	0.61875	0.235671	4.71152e-08
P-value	Clostridium sp. CAG:609	0.551727	0.00554811	1.05336e-05	0.0106669	0.767191	0.13169	0.0136728	0.239184	0.0709087	0.28519	4.45955e-23	9.04371e-13	1.65121e-45	0.186733	0.00952175	2.50621e-62	0.224821	0.809786	0.864992
P-value	Clostridium sp. CAG:62	0.145931	4.16842e-20	1.98028e-20	1.04598e-09	0.382263	8.18501e-05	0.000421788	0.639219	7.0441e-13	0.2879	0.0349168	0.194169	0.0605482	0.0159205	3.02219e-14	0.189136	0.721333	2.90015e-25	1.58987e-13
P-value	Clostridium sp. CAG:628	0.878037	4.91585e-05	1.36621e-20	2.93354e-10	0.73263	0.808461	0.00358814	0.174384	0.0371374	0.217472	3.64152e-18	0.0284259	1.01334e-15	0.522702	0.0469078	1.1202e-32	5.92879e-05	2.56842e-39	0.00138274
P-value	Clostridium sp. CAG:632	0.459447	3.0931e-09	0.451146	0	0.714962	0.153126	0.409546	0.466201	0.0258714	0.187379	1.36449e-132	4.60217e-53	1.82089e-71	0.494426	0.171183	2.50198e-28	0.000322476	0.00737569	2.19977e-05
P-value	Clostridium sp. CAG:678	0.607838	0.0163191	4.96494e-08	0.361877	0.897301	0.613632	0.496157	3.83992e-08	0.599363	8.5074e-10	0.49218	0.496157	0.698421	5.14745e-16	0.108462	0.737279	0.802604	0.327541	0.00143485
P-value	Clostridium sp. CAG:7	0.080455	2.88365e-104	8.70881e-06	0.0505068	0.212948	0.137717	3.05755e-21	0.0521355	0.828021	0.0193454	8.40458e-26	0.00155314	4.71041e-07	0.309888	0.193927	1.3721e-09	0.859759	1.13496e-06	2.56558e-71
P-value	Clostridium sp. CAG:710	0.844579	5.32477e-05	4.97439e-10	2.74413e-59	0.778982	0.00810384	8.1019e-18	0.264518	0.0868878	0.311003	2.25574e-95	3.71406e-05	1.14012e-36	0.599523	0.373785	2.24129e-14	0.58677	0.312815	0.00547968
P-value	Clostridium sp. CAG:762	0.0727851	0.00453957	5.66054e-24	2.42724e-11	0.843182	6.65183e-06	0.950417	0.431574	0.227542	0.47514	0.0585331	0.946201	1.39768e-106	0.711283	2.76235e-19	8.42603e-08	0.701624	2.27266e-13	0.0276451
P-value	Clostridium sp. CAG:768	0.364407	1.86526e-11	0.195059	0.107009	0.819542	0.000227753	0.732364	0.839149	0.518051	0.682749	0.703996	0.229019	0.493467	0.0502345	0.392657	0.553243	0.0657787	0.847157	0.0014121
P-value	Clostridium sp. CAG:780	0.273862	0.0359901	0.000248018	0.817047	0.666738	0.390299	0.190444	0.0868712	0.548843	0.374493	0.00018122	0.000167617	1.06043e-16	0.420415	0.306838	0.456034	0.404285	0.602103	0.00291996
P-value	Clostridium sp. CAG:793	0.0625105	0.0415457	0.000291168	0.00569216	0.741905	0.197657	0.591508	0.287836	0.0445176	0.234487	2.71394e-17	2.93974e-20	0.00168008	0.537778	0.678712	0.129845	0.335079	0.0710034	0.18206
P-value	Clostridium sp. CAG:798	0.00013926	0.0119621	4.93003e-15	0.120504	0.826051	0.389973	0.246546	0.00870861	0.180052	0.42757	0.242202	0.246546	0.509448	0.680934	1.05737e-25	0.567885	0.670379	1.38549e-07	0.767641
P-value	Clostridium sp. CAG:91 & sp. 2789STDY5834873	8.65775e-07	0.408617	0.00440164	1.798e-05	0.922376	0.547248	0.0042408	0.332264	0.13301	0.895272	1.3026e-05	0.00285108	1.3502e-06	0.274616	0.129524	0.00105649	0.00988475	0.777779	0.113449
P-value	Clostridium sp. CAG:914	0.237353	0.268227	0.706903	1.44337e-10	0.766308	0.133138	0.267047	0.237353	0.499546	0.283311	0.290858	0.805467	6.82538e-13	0.57816	2.75433e-10	0.439864	0.564886	5.36634e-05	0.000166348
P-value	Clostridium sp. CAG:921	0.589048	0.00129567	0.00341277	2.82639e-05	0.845407	0.0588306	0.049119	0.438224	0.739488	0.481509	1.68131e-09	0.966378	6.813e-16	0.715251	0.0418653	0.141365	0.705711	0.271862	0.141601
P-value	Clostridium sp. CAG:964	0.241168	5.95939e-06	1.51197e-09	5.51947e-05	0.808609	0.227524	0.742921	0.237296	0.433128	0.381896	4.85653e-29	0.201541	1.79585e-49	0.650408	0.364094	1.60066e-19	0.638992	0.0628211	0.00293753
P-value	Clostridium sp. CAG:967	0.00251125	0.00810574	1.7707e-06	0.315003	0.886896	0.209626	0.453288	0.00252793	0.38562	0.607627	0.44912	0.453288	0.669409	0.790144	1.84204e-66	0.711633	0.782956	6.32438e-07	0.435662
P-value	Clostridium sp. CL-2	0.468364	0.0228991	0.586301	1.05828e-18	0.778681	0.00740057	0.138373	0.829071	4.44532e-09	0.982775	4.5182e-05	0.436913	0.398888	0.599013	0.000126265	0.465146	0.193513	0.0138109	0.087462
P-value	Clostridium sp. KLE 1755 & Clostridiales bacterium VE202-27	0.682745	0.0737731	0.742366	1.88773e-18	0.926982	0.434447	3.28645e-06	0.374901	0.0868812	0.0742088	4.74249e-11	4.81154e-08	0.000210975	0.55423	0.000760826	0.00133658	0.0503245	0.000396749	1.53011e-07
P-value	Clostridium sp. L2-50	0.94966	0.0097797	1.89653e-06	5.20311e-39	0.503186	0.351846	0.848336	0.0798194	0.000445675	0.155075	7.44276e-98	0.000400604	8.88982e-20	0.121416	0.794141	0.065829	0.194774	0.00389504	8.2396e-05
P-value	Clostridium sp. Marseille-P2538	0.69862	0.070192	0.601017	0.491493	0.922423	0.0226063	0.607619	0.0256999	0.5525	0.725165	0.604301	0.607619	0.77003	0.855417	0.715182	0.800187	0.850399	9.55448e-16	0.473969
P-value	Clostridium spiroforme	0.000683089	1.45067e-62	0.229851	2.51628e-24	0.53752	0.787599	1.06462e-14	0.0142538	0.000152864	0.638549	2.52057e-14	1.27636e-10	7.15723e-06	0.290454	0.006981	0.000101836	0.00378345	1.43351e-07	3.9315e-127
P-value	Clostridium symbiosum	0.130553	1.18128e-33	0.000786072	2.6254e-21	0.000679749	0.327124	1.34919e-05	0.162488	5.5854e-07	0.278939	1.07753e-16	2.1427e-06	2.27802e-05	0.465934	0.0347598	5.28989e-05	0.276578	0.00277391	3.8739e-08
P-value	Colibacter massiliensis	0.84486	0.360505	0.791557	0.728085	0.960757	0.847329	0.795244	0.84486	0.764016	0.858976	0.793392	0.795244	0.882546	0.926632	4.16203e-08	0.898216	0.924063	0.683005	1.60502e-05
P-value	Collinsella aerofaciens	1.35231e-11	8.34495e-12	0.615247	2.92022e-25	0.0755609	0.0118486	0.621056	1.85575e-11	9.27573e-05	4.07392e-10	3.9202e-32	2.64063e-57	2.93973e-11	0.0909468	5.25981e-10	0.00303673	3.63784e-05	2.249e-28	2.75376e-08
P-value	Collinsella bouchesdurhonensis	0.0100256	1.93852e-20	1.11715e-05	1.12712e-38	0.556937	0.0351448	0.040346	1.55901e-07	0.135203	0.0121215	4.38345e-117	1.86477e-169	3.98384e-26	0.271761	7.98896e-05	1.10104e-42	0.10248	3.76282e-06	0.35654
P-value	Collinsella intestinalis	0.0328302	0.0516596	0.00865518	1.17947e-05	0.51306	0.223569	0.00188391	0.0279476	0.15224	0.591436	0.000497074	0.0249766	0.153309	0.221035	0.0421407	0.0891419	0.205244	0.376214	0.0759426
P-value	Collinsella stercoris	0.841049	0.000684413	0.401016	0.355042	0.778446	0.864206	0.137942	0.846366	0.610482	0.309799	0.134334	0.137942	0.722231	0.598614	0.291796	0.464658	0.585837	0.99876	5.34276e-14
P-value	Collinsella tanakaei	0.0475895	5.25207e-24	0.00944118	5.22796e-05	0.544634	0.338719	0.00139573	0.297214	0.190181	0.799055	0.00125908	0.00139573	0.208645	0.257011	0.023197	0.11537	0.59065	0.0711037	9.79642e-05
P-value	Comamonas kerstersii	0.0166307	4.04156e-12	0.119363	3.91089e-69	0.546987	0.0611318	6.7708e-08	0.0511322	0.000752361	0.0296781	2.31681e-92	0.698272	0.98801	0.259801	0.0240138	0.117511	0.000744882	0.000105851	7.70163e-17
P-value	Coprobacillus cateniformis	0.0391108	5.69862e-07	0.0021096	1.12968e-06	0.266325	0.0558991	1.39155e-07	0.400892	0.230727	0.940233	2.93694e-06	0.0948889	0.0012032	0.497216	0.0962257	0.0178302	0.909801	0.00288411	0.00418126
P-value	Coprobacillus sp. 8_1_38FAA / Clostridium sp. 2789STDY5608874	0.00358721	0.00480513	3.31471e-17	0.679259	0.255158	8.35327e-07	1.99652e-08	0.644247	2.06027e-05	0.578724	0.388685	5.41066e-08	4.74296e-06	0.0126145	1.0213e-07	0.146377	0.0912862	7.35579e-31	0.224096
P-value	Coprobacillus sp. CAG:605	0.102655	1.0874e-05	2.44893e-14	5.58189e-21	0.777676	5.37333e-06	2.904e-08	0.261629	0.0849891	0.308075	6.78867e-109	3.61861e-08	2.13131e-42	0.152873	0.00445638	0.000664934	0.198771	0.642977	0.180621
P-value	Coprobacillus sp. CAG:698	0.245205	0.00648963	4.8727e-76	1.25613e-05	0.883757	0.567373	0.440765	0.561045	0.372482	0.59763	1.82778e-108	0.440765	4.019e-57	0.784422	0.197064	1.65346e-38	0.77705	0.000321814	0.0228002
P-value	Coprobacillus sp. CAG:826	0.501094	0.00161693	9.8981e-07	1.54601e-22	0.865625	0.389537	0.0094771	0.501094	0.301979	0.541282	2.23698e-13	0.161604	1.51304e-21	0.751538	0.0101229	2.12531e-28	0.743117	0.000447538	0.325531
P-value	Coprobacter fastidiosus	0.116988	0.831191	8.38599e-20	1.02937e-16	0.873631	0.000384396	1.63433e-08	0.00608562	0.849158	0.00103107	9.114e-11	0.0132195	0.000261703	7.02707e-06	3.36284e-06	0.00157541	0.0185247	5.0275e-34	0.00331472
P-value	Coprobacter secundus == Gabonia massiliensis	0.725046	0.0165221	3.81447e-17	3.62742e-06	0.303207	0.0188107	0.00722442	0.894021	0.751603	5.70854e-05	1.13096e-06	0.000111295	0.00686159	7.04727e-06	0.512669	0.00745161	0.0496145	6.4857e-30	1.75854e-07
P-value	Coprococcus catus	3.54764e-10	0.973678	2.53273e-15	5.10891e-15	0.288419	2.32672e-09	5.27142e-06	0.000143025	0.348192	7.56953e-09	1.32115e-11	0.000831509	4.12886e-07	0.0132108	4.92989e-28	1.87745e-06	0.0315538	6.27681e-49	6.07668e-29
P-value	Coprococcus comes	2.96966e-12	0.0590706	6.05478e-12	0.00030453	0.109036	1.14993e-14	4.74841e-09	3.63024e-05	7.71682e-06	1.25847e-10	0.00234856	1.40345e-18	0.635571	0.000368431	5.66138e-19	0.276803	4.2639e-05	9.83632e-31	3.29189e-21
P-value	Coprococcus eutactus 1	0.858663	7.76641e-05	0.952151	1.26145e-26	0.201317	0.243268	0.0394165	0.304705	0.00125603	0.0736753	4.89148e-58	4.93496e-35	3.8679e-13	0.246649	2.6219e-07	0.75828	0.0115379	4.37686e-05	0.00653794
P-value	Coprococcus eutactus 2	0.600405	0.000658721	1.33054e-14	2.49047e-30	0.157417	4.90277e-05	0.0215428	0.31402	2.9056e-11	0.371006	6.22361e-12	6.60717e-10	1.98597e-09	0.125532	0.000799926	0.0235622	0.149617	6.32779e-14	2.34955e-05
P-value	Coprococcus sp. 2789STDY5608819 / Clostridium sp. CAG:264	0.31993	1.7587e-18	0.238042	2.21945e-18	0.300338	0.0377423	0.0518102	0.789591	0.00581816	0.418666	7.76347e-12	0.665175	0.239362	0.581854	0.00848145	0.0707645	0.00386527	0.229891	8.45007e-21
P-value	Coprococcus sp. CAG:782	0.402157	0.574038	0.527554	2.39576e-134	0.621755	0.413386	0.908261	0.0498077	0.00260549	0.0748972	2.44871e-180	1.01074e-18	4.73199e-46	0.355966	0.0645008	1.78324e-07	0.870788	0.0941097	7.06385e-12
P-value	Coprococcus sp. HPP0074 & HPP0048 / Lachnospiraceae bacterium 9_1_43BFAA & 6_1_37FAA	0.895556	1.15769e-40	0.000449523	1.43573e-09	0.379576	0.052598	3.61431e-05	0.0988334	1.26831e-05	0.00151117	2.32191e-05	3.64228e-05	0.00834508	0.405574	0.0697546	0.0223883	0.0888047	3.23864e-06	1.38298e-07
P-value	Coraliomargarita sp. CAG:312	0.243126	0.00737589	1.9689e-25	1.30498e-11	0.752469	4.73535e-19	0.0963067	5.96388e-06	0.166425	0.48373	0.0423539	0.677814	0.343786	0.266288	0.0015218	0.412407	0.54133	0.0127732	0.12062
P-value	Corallococcus sp. CAG:1435	0.619873	0.020274	1.23766e-08	0.378129	0.900712	0.000238038	0.510649	0.619873	0.549864	0.652425	0.506746	0.510649	0.70802	0.815423	0.640151	0.745742	0.809065	0.274458	0.000134407
P-value	Cryptobacterium sp. CAG:338	0.223549	3.11257e-74	0.80556	0.0022931	0.459555	1.81947e-05	0.00551864	0.2209	0.178151	0.66822	0.128554	9.54443e-05	0.0264085	3.49944e-08	0.31085	0.054585	0.391835	0.705547	1.38134e-20
P-value	Culturomica massiliensis	0.108838	4.65935e-40	0.228151	0.00436454	0.686733	0.35196	0.100163	0.108838	0.0138666	0.145422	0.0318398	0.404597	0.226051	0.450516	0.130749	0.294578	0.434773	0.0886493	5.95584e-06
P-value	Dakarella massiliensis	0.620576	1.49165e-09	0.0134376	0.0229549	0.747584	0.698704	0.275304	0.000284174	0.155136	0.765128	0.0867666	4.46802e-07	0.334021	0.285422	0.628691	0.402927	0.533103	0.0191379	1.02402e-35
P-value	Desulfovibrio desulfuricans	0.522097	2.8443e-06	0.754054	0.255369	0.872089	0.528823	0.395926	0.522097	8.24907e-12	0.243878	0.39157	0.395926	0.628879	0.763228	0.546321	0.675619	0.755176	0.588479	0.0121442
P-value	Desulfovibrio fairfieldensis	0.0727895	0.186687	0.815911	0.0834372	0.570191	0.416573	0.0285005	0.762004	0.00507846	0.0403887	0.333275	0.224013	0.264907	0.349414	0.337086	0.140047	0.897213	0.358951	0.0372923
P-value	Desulfovibrio piger	0.0752026	1.27255e-08	0.00864907	1.3769e-25	0.288095	0.281952	0.0126706	0.974551	0.000960587	0.238275	8.60888e-10	2.37556e-21	9.40939e-16	0.737508	0.0467433	3.3328e-10	6.07034e-05	0.000583635	2.1422e-23
P-value	Desulfovibrio sp. 92-2	0.112506	0.0399068	0.251603	0.00478245	0.689771	0.384279	0.110592	0.112506	0.482783	0.149585	0.0336329	0.521506	0.230837	0.455163	0.415414	0.299546	0.439488	0.00109422	0.00138857
P-value	Desulfovibrio sp. An276	0.641028	7.97349e-19	0.00746993	0.407415	0.906643	0.646413	0.536346	0.641028	0.474397	0.672028	0.532582	0.536346	0.724807	0.826318	0.660348	0.760519	0.820322	0.330499	0.0679542
P-value	Desulfovibrio sp. Zagget14	0.367719	0.463865	0.185068	0.718339	0.820763	0.786905	0.0247386	0.813613	0.521534	0.413424	0.713195	7.47291e-07	0.416017	1.19685e-05	6.12353e-05	0.555979	0.660818	0.302306	0.603648
P-value	Dialister invisus	0.650265	4.9719e-40	0.162462	2.57561e-18	0.92767	0.446751	7.01339e-07	0.2521	0.0501424	0.00119686	0.000139058	0.000524273	8.54403e-05	0.323434	1.61175e-06	0.000671073	0.0530874	1.6309e-18	1.00572e-60
P-value	Dialister pneumosintes	0.179214	2.00131e-06	0.069631	0.541165	0.735485	0.186323	0.227461	0.836932	0.0411487	0.22262	0.611547	0.225202	0.0458271	0.527326	0.205556	0.757781	0.512927	0.465211	0.00168124
P-value	Dialister sp. CAG:357	0.0235721	9.41258e-218	0.0019469	1.88254e-14	0.250448	7.06261e-05	0.484846	0.117526	1.15091e-07	0.00169483	9.09139e-10	0.981443	0.000560038	0.421693	0.00089153	0.0028167	0.0260277	8.14487e-09	1.09434e-37
P-value	Dialister sp. CAG:486	0.149083	2.96579e-21	0.331933	0	0.553785	0.986806	8.01316e-14	0.018559	0.0789291	0.395453	1.8583e-162	2.61686e-305	4.64954e-87	0.267944	0.765665	1.0607e-34	0.000285893	0.000862582	1.00349e-06
P-value	Dialister succinatiphilus	0.216443	0.133782	0.289841	0.0570953	0.704407	0.538218	1.76692e-77	0.90582	0.0627799	0.0146784	0.130706	0.104362	0.254783	0.477819	0.489684	0.324142	0.462499	0.0339922	0.0605453
P-value	Dielma fastidiosa	0.121772	0.189247	0.328297	2.14733e-11	0.296041	0.575956	2.44332e-05	0.0439781	0.00291123	0.650703	2.58434e-08	0.0181659	0.00170648	0.385507	0.651815	0.00660879	0.458848	5.95821e-07	0.000350974
P-value	Dorea formicigenerans	9.69769e-12	0.268617	0.149663	1.77308e-13	0.122319	1.6132e-11	1.58797e-24	0.00164113	0.288639	9.50902e-11	3.61069e-09	6.32319e-10	0.0296993	0.00211661	7.17154e-17	0.353905	4.33616e-08	6.1347e-16	1.37416e-16
P-value	Dorea longicatena 1	5.18901e-16	1.59987e-68	1.02124e-21	9.33081e-34	0.0430753	2.41669e-10	0.0522716	3.12782e-07	2.58791e-05	3.73298e-21	1.54163e-12	2.19879e-34	0.0374317	4.856e-06	4.02387e-17	0.292766	0.625826	1.94031e-68	0.000340489
P-value	Dorea longicatena 2	0.00327111	4.64553e-66	5.96772e-05	0.000154989	0.258453	0.00484003	1.48201e-08	0.00203581	0.418564	0.255499	0.000267634	0.000640221	0.0574365	0.573138	0.0855506	0.89596	3.87658e-09	0.0457536	2.37729e-65
P-value	Dorea sp. CAG:105	2.14427e-15	0.370461	1.54428e-07	1.48411e-10	0.150882	3.3615e-11	6.95985e-09	0.0398538	4.68096e-06	2.69622e-19	5.45701e-17	0.277295	0.00113116	3.18812e-05	4.65441e-18	6.24635e-12	0.852935	2.27027e-52	2.42665e-24
P-value	Dorea sp. CAG:317	9.63518e-06	4.1998e-19	0.105771	4.99808e-10	0.0424347	0.00850907	1.16557e-05	0.991675	0.475667	0.279604	2.92659e-06	1.12281e-05	0.00840128	0.755261	8.63198e-05	0.0225045	0.0890805	4.97242e-10	4.64647e-42
P-value	Drancourtella sp. An12 & An57	0.0143866	0.335538	0.674355	0.101494	0.816698	0.364562	0.221636	0.192401	3.53721e-06	0.402723	0.21739	0.221636	0.486558	0.664515	0.767957	0.546894	0.653492	0.801339	0.345619
P-value	Duodenibacillus massiliensis	0.60735	1.82515e-13	0.000279133	4.51995e-104	0.611821	8.79527e-05	9.43958e-34	0.337811	0.00628055	0.526424	1.03186e-158	0	0.00866735	0.884567	0.370273	0.187201	0.242051	0.401584	4.03064e-05
P-value	Eggerthella lenta	8.14068e-11	5.17329e-20	4.26642e-18	8.32498e-52	0.0710623	0.00971771	2.22633e-20	0.31448	2.27699e-16	0.00206543	7.02142e-21	1.82302e-08	1.16807e-10	0.00976767	0.213149	2.25255e-09	0.010235	1.12337e-13	1.6173e-09
P-value	Eggerthella sp. 51_9 & CAG:209	7.34013e-17	9.15354e-39	1.17472e-73	1.46929e-53	0.450276	1.07341e-10	0.804967	1.59683e-10	0.906376	0.0069603	7.38752e-119	5.21928e-56	1.63995e-16	0.784201	1.33612e-44	0.715355	0.454467	1.12905e-14	0.391397
P-value	Eggerthella sp. CAG:1427	0.198969	2.21807e-05	0.662096	0.124401	0.815015	0.188473	0.217345	0.85954	0.153526	0.722297	0.21312	0.682514	0.482493	0.661573	0.147459	0.543152	0.650468	0.772135	0.0120075
P-value	Eggerthella sp. CAG:298	0.174081	9.02844e-14	0.847909	8.74198e-11	0.198397	0.138794	7.40525e-09	0.00166666	0.114474	0.109885	0.00191326	0.735124	0.000497962	0.253917	3.42798e-05	0.000829199	0.390554	1.19179e-27	6.23681e-11
P-value	Eggerthella sp. CAG:368	1.44382e-06	5.6054e-11	6.42149e-24	4.3961e-24	0.652241	0.000286552	0.142647	0.557967	0.0185436	0.764053	6.59238e-121	2.92252e-15	1.0103e-65	0.399137	4.02247e-15	1.69706e-28	0.382789	6.33674e-12	0.0254595
P-value	Eisenbergiella tayi	0.00832555	4.64096e-05	0.326867	3.74802e-18	0.00749107	2.57776e-05	8.1713e-10	0.0306782	0.826192	0.527249	3.99464e-14	0.18854	2.07027e-05	0.0313185	6.47835e-07	0.000228214	0.075626	6.33194e-27	0.000730805
P-value	Emergencia timonensis	0.237725	1.028e-06	0.0863742	4.31301e-07	0.475118	0.566492	0.00016475	0.0481449	0.324834	0.0316639	0.000143154	0.000482273	0.0320421	0.637057	0.285936	0.0634337	0.166622	0.0186086	0.969208
P-value	Enorma massiliensis	0.834402	5.34233e-12	0.961262	9.19698e-05	0.580267	1.07742e-12	0.0308195	0.000265239	0.0795638	0.719771	0.0101652	0.00353772	0.305729	0.00199704	0.56786	0.150658	0.284179	7.49433e-20	2.43468e-10
P-value	Enterobacter asburiae	0.0598311	0.0417268	0.0110083	1.97394e-92	0.635961	0.201238	0.598662	0.190253	0.855165	0.0874796	2.64455e-17	0.0985494	0.137657	0.375812	0.23021	0.218614	0.35928	0.00474119	1.14654e-06
P-value	Enterobacter cloacae	0.0378295	1.28405e-14	0.0163211	3.5997e-70	0.601459	0.0410298	5.31306e-41	0.0378295	0.0125061	0.0593513	0.95931	0.00587468	0.116914	0.328458	0.0503287	0.550113	0.00151279	1.41122e-05	1.92238e-12
P-value	Enterobacter cloacae complex 'Hoffmann cluster IV'	0.00133407	5.54126e-28	1.83532e-06	4.56603e-127	0.374751	0.00463979	2.10622e-07	0.00364279	0.0700536	0.029407	1.19748e-18	0.0109652	0.000204681	0.0967696	0.000879398	0.0711338	1.26625e-13	1.2257e-09	1.66662e-26
P-value	Enterobacter kobei	0.0751936	1.85966e-36	0.00110713	2.04259e-32	0.503303	0.00883325	0.507242	0.0261394	0.337432	0.0156761	0.000492584	0.00135969	0.626774	0.210475	0.0121377	0.262173	0.00471484	8.97699e-07	9.83769e-16
P-value	Enterobacter ludwigii	0.533545	8.69168e-08	0.122442	0.597976	0.651687	0.252469	0.773769	0.229082	5.89209e-06	0.343922	0.108533	0.473983	0.175396	0.398333	0.678003	0.24071	0.381978	0.176067	2.99731e-05
P-value	Enterobacter mori	0.545398	1.21903e-09	0.364538	0.00793548	0.770301	0.253394	0.245635	0.245704	0.235684	0.291864	1.28243e-07	0.12366	0.380782	0.584863	0.869734	0.447949	0.57175	0.122968	6.93619e-05
P-value	Enterobacter xiangfangensis	0.0236662	4.56872e-30	2.74825e-05	5.68469e-48	0.405322	0.26468	1.43676e-11	0.0030457	0.0482877	0.379866	0.529627	0.269654	0.465757	0.374244	0.0510046	0.000189348	0.0705275	1.29607e-07	2.79586e-20
P-value	Enterococcus asini	0.717629	3.59199e-11	0.62525	0.52053	0.92753	0.721988	0.631522	0.717629	0.183014	0.742639	0.62837	0.631522	0.784822	0.864865	0.733238	0.813122	0.860168	0.450424	0.157014
P-value	Enterococcus avium	5.27822e-15	0.509728	0.407186	0.275528	0.87733	0.00569074	0.0849933	0.539428	2.15133e-29	0.001991	0.0910949	0.415727	0.643118	0.772732	0.563017	0.688298	0.764983	0.688464	0.0162162
P-value	Enterococcus faecalis	5.25133e-07	0.00126314	0.0866951	0.187728	0.594827	2.77734e-27	0.104681	0.0528207	0.000307519	1.56305e-05	0.0327362	0.349312	0.772196	0.31969	0.000426759	0.16689	0.296274	0.431106	2.54585e-06
P-value	Enterococcus faecium	5.77392e-10	0.000574268	0.0624242	0.828747	0.618686	5.22615e-30	0.335523	8.26922e-10	0.0382514	0.971566	0.0108475	0.318222	0.438856	0.867457	0.69115	0.195827	0.879841	0.437088	7.38036e-05
P-value	Enterococcus gallinarum	0.262765	0.294154	0.424611	0.29353	0.881797	8.45306e-11	0.0653538	0.55441	4.15809e-07	0.591421	0.0691288	0.603497	0.0699879	0.780853	0.210144	0.699164	0.773365	0.705961	0.0830303
P-value	Erysipelatoclostridium ramosum	6.45035e-05	1.8826e-26	1.37319e-05	5.98272e-15	0.0163126	0.337498	5.58645e-08	0.164116	2.95269e-30	0.516725	3.73926e-10	7.24413e-08	0.00016804	0.445107	0.0420123	9.75669e-05	0.0404667	0.0128231	3.87827e-15
P-value	Erysipelotrichaceae bacterium 3_1_53	0.446633	0.0334701	0.0999855	4.29764e-06	0.28691	0.0055633	0.000610376	0.0923592	0.00569585	0.935511	0.00054273	0.162166	0.0511557	0.570082	0.308446	0.0913282	0.208328	0.0547058	0.477549
P-value	Erysipelotrichaceae bacterium 5_2_54FAA / Eubacterium sp. 3_1_31	0.794799	1.72154e-23	0.00163165	5.82953e-14	0.0853698	0.518406	2.25102e-08	0.00138638	0.0187854	0.35591	1.66625e-08	6.88966e-06	0.00147373	0.176484	0.460641	0.00590626	0.0402322	0.115816	1.0172e-104
P-value	Escherichia coli	0.358584	1.54706e-132	5.8808e-17	6.21693e-07	0.0546126	0.812773	4.81365e-07	0.281007	0.0361851	2.24024e-05	3.61554e-35	0.000381787	0.228079	0.00146366	0.557341	0.0192371	0.444614	0.054168	3.66639e-164
P-value	Escherichia fergusonii	0.267062	0.00176212	0.133851	8.85364e-22	0.780125	0.274845	0.141033	0.267062	0.277275	0.313578	1.61992e-48	0.141033	0.402054	0.601462	0.295567	0.46814	0.00132245	0.0204822	0.000175634
P-value	Eubacteriaceae bacterium CHKCI004 & Eubacterium sp. An3	0.240092	0.0323051	0.434242	0.303616	0.884221	0.568931	0.442604	0.56262	1.9768e-07	0.599103	0.438395	0.442604	0.66202	0.785268	0.585313	0.705084	0.777922	0.0102675	0.0961319
P-value	Eubacterium dolichum	0.491067	0.598567	0.00110628	1.12439e-08	0.419959	0.869304	2.08674e-05	0.156658	0.0077375	0.489566	1.74779e-05	0.0156401	0.015476	0.131313	0.0726859	0.0360747	0.367763	0.0044749	9.99759e-07
P-value	Eubacterium eligens	5.86213e-06	2.05407e-25	4.41297e-05	6.38123e-05	0.541482	0.00029511	0.0771986	0.968443	0.0392525	0.996485	0.798634	4.51713e-10	0.663247	0.0886739	0.00388277	1.99497e-05	0.0281166	0.0723918	4.58772e-25
P-value	Eubacterium hallii	2.75897e-22	0.00179688	5.25206e-16	0.000556544	0.0439762	4.5705e-12	7.64397e-30	2.26568e-05	6.60034e-07	4.76781e-20	0.00752205	4.12636e-15	0.00238149	1.06921e-05	1.27559e-28	0.89395	0.00148712	4.57413e-78	7.3495e-24
P-value	Eubacterium ramulus	1.31661e-09	3.7087e-32	2.05895e-10	4.89414e-06	0.500688	1.09709e-12	1.57312e-18	4.33407e-07	1.52573e-05	4.89585e-08	0.0864249	9.74232e-15	0.0198147	0.0263515	2.7119e-15	4.63166e-08	1.60624e-05	1.55533e-24	5.20955e-07
P-value	Eubacterium rectale	0.0165292	5.44909e-24	0.000304899	3.2492e-18	0.884353	0.00983607	0.559124	0.442655	0.00355784	2.80175e-05	0.00966988	6.44431e-13	0.00767987	0.0623058	0.000149235	0.561982	9.35006e-07	1.21827e-05	6.3206e-06
P-value	Eubacterium siraeum	0.0151446	5.65858e-58	4.23246e-16	1.13861e-05	0.598727	0.0292888	0.0372376	0.674816	2.9821e-05	0.00048759	0.00230892	5.70657e-08	0.0999042	0.430873	5.6936e-11	8.51376e-05	0.116335	1.32185e-36	4.8101e-25
P-value	Eubacterium sp. 2789STDY5834909	0.00758965	7.93471e-06	0.39381	0.000186064	0.574556	0.81193	0.00306836	0.224246	0.00181109	0.681278	3.33561e-10	0.00306836	4.99126e-21	0.293585	0.99095	2.54108e-07	4.29039e-09	0.0808822	0.000215969
P-value	Eubacterium sp. 36_13 & CAG:86	0.0168485	1.09954e-10	5.09531e-11	4.10241e-05	0.0569895	0.0752834	0.954456	0.00137181	3.02795e-08	0.542215	0.023655	8.1766e-05	0.359763	0.016202	0.00620533	9.14397e-05	0.0348189	0.980754	1.88416e-05
P-value	Eubacterium sp. 38_16 & CAG:146	5.42328e-08	4.42371e-08	0.146297	0.000237654	0.702333	0.0138645	1.88959e-21	0.773303	4.47591e-07	0.00176295	4.87466e-08	1.63245e-10	1.14051e-06	0.0219983	0.0102788	0.00358308	0.000945831	4.13615e-14	5.41683e-22
P-value	Eubacterium sp. CAG:115	0.0143769	1.78881e-15	3.44347e-23	0.757997	0.251954	0.000410357	1.1901e-06	0.21371	5.70784e-09	0.511391	0.723771	1.14915e-23	0.912554	0.167703	1.12993e-08	0.666942	0.00813929	1.54722e-20	0.000398634
P-value	Eubacterium sp. CAG:156	0.203693	2.50082e-33	5.21377e-06	3.0241e-21	0.991579	0.00355601	2.85242e-11	0.10025	0.0327605	0.40887	0.0557973	3.85372e-09	0.000185526	0.726725	1.41975e-08	0.29697	0.0451059	7.10299e-07	4.98634e-23
P-value	Eubacterium sp. CAG:161	1.99558e-06	2.52769e-06	4.38056e-22	0.000100931	0.262277	3.24859e-13	0.0526321	0.337301	0.00325614	0.000247841	3.74756e-06	0.599481	0.113406	0.00186493	1.06809e-12	0.0114314	0.0299229	9.06117e-74	0.0539075
P-value	Eubacterium sp. CAG:180	0.349118	2.58944e-13	0.65298	9.20455e-35	0.598881	0.00843715	0.632515	0.353583	0.105745	0.0609305	0.350912	2.25826e-45	0.0110545	0.983933	0.556059	0.425218	0.307195	1.72505e-21	4.78024e-48
P-value	Eubacterium sp. CAG:192	0.12761	7.11653e-34	0.0855645	1.01726e-28	0.118234	0.54068	1.2666e-12	0.0685884	1.45367e-07	0.323734	8.41386e-07	1.15486e-08	7.6061e-06	0.730359	0.8707	4.89405e-05	0.464671	0.00165074	0.000416965
P-value	Eubacterium sp. CAG:248	1.93137e-05	7.18495e-13	0.220891	0.000196122	0.140188	0.297972	0.197241	3.9785e-05	0.0130835	0.69884	1.78833e-11	6.88657e-07	0.00336526	0.0276542	0.0117714	0.0164657	3.98553e-06	7.93991e-17	8.33214e-07
P-value	Eubacterium sp. CAG:251 / Clostridium sp. A254.MGS-251	1.47534e-05	0.623341	0.173428	5.88978e-24	0.197404	0.235524	0.141431	0.88354	2.4146e-05	0.0657189	9.21949e-06	6.76023e-08	4.87697e-05	0.527323	0.965837	0.0236287	0.614585	1.39197e-14	6.8474e-11
P-value	Eubacterium sp. CAG:252	0.138987	5.10618e-54	0.499778	1.04097e-62	0.779398	0.133319	0.735425	0.781934	0.0219208	0.729504	3.90755e-12	8.03974e-05	0.00700924	0.177761	0.575503	0.00808706	0.527777	0.00724713	5.59204e-43
P-value	Eubacterium sp. CAG:274	0.0177452	8.29135e-44	3.19727e-05	8.16187e-07	0.372172	0.845932	5.63557e-05	0.35542	0.00205937	0.0114331	2.00188e-06	0.000860949	0.00738381	0.617631	0.414704	0.0203725	0.262455	0.605868	1.40724e-15
P-value	Eubacterium sp. CAG:38	0.000496818	2.35128e-69	9.83836e-05	6.80654e-10	0.555436	0.153104	1.36111e-08	0.79501	0.153496	0.213435	4.65266e-07	0.0303935	0.00010985	0.873569	0.0846227	2.66979e-05	0.935687	1.37984e-06	2.52473e-37
P-value	Eubacterium sp. CAG:581	0.723364	1.95965e-31	0.139936	3.16432e-23	0.469697	0.80987	1.02361e-07	0.174812	1.22191e-05	0.0218479	1.46289e-53	0.219678	2.03364e-37	0.818623	0.283526	0.000153483	0.970343	0.0458751	3.13499e-25
P-value	Eubacterium sp. CAG:603 & sp. 2789STDY5608818	0.598502	0.00453123	0.329419	9.84952e-28	0.764603	0.565346	0.696895	0.743688	0.0677365	0.279708	6.10069e-64	0.351243	1.13388e-44	0.575307	0.477015	4.24528e-17	0.235914	0.0136537	0.0649893
P-value	Eubacterium sp. CAG:786	0.298806	1.00722e-06	7.05946e-08	0	0.793835	0.324015	0.902038	0.298806	0.11089	0.345474	3.37479e-90	0.527124	1.50556e-68	0.624873	0.941819	0.424023	0.000347994	0.232153	0.00213338
P-value	Eubacterium sp. CAG:841	0.343023	0.000247925	0.0487464	0.397922	0.811494	0.350855	4.66696e-06	0.343023	0.456803	0.389254	0.000241111	2.96754e-10	6.25994e-07	0.65543	0.166821	2.05157e-20	0.644153	0.368398	0.000197195
P-value	Eubacterium sp. ER2	0.00329502	0.00244474	0.458468	0.145697	0.83684	1.77696e-05	0.888918	0.00371669	0.699451	0.0464091	0.27313	0.277551	0.53646	0.700009	0.593991	0.592498	0.690013	0.0258616	0.000989818
P-value	Eubacterium ventriosum	0.946824	5.58524e-31	0.277157	9.36483e-36	0.198381	1.49347e-05	3.05695e-14	0.0201156	0.252731	0.17622	2.81074e-06	8.48555e-19	1.19487e-11	0.282574	0.000622804	0.000147715	0.826128	0.297326	2.32448e-12
P-value	Faecalibacterium prausnitzii 1 (A2-165)	0.938494	0.0055972	0.750985	0.039189	0.0429382	0.00460672	0.0276535	1.41449e-05	0.574565	7.99085e-06	0.982976	1.70409e-36	0.141383	0.275814	2.48241e-05	0.345441	0.177491	0.000737152	0.173002
P-value	Faecalibacterium prausnitzii 2	0.0696323	0.0291183	0.0502755	5.03852e-05	0.0710063	0.349556	0.00069111	0.017802	2.35908e-06	0.00125928	7.00953e-08	5.5373e-24	5.8913e-09	0.113053	0.419936	0.00054378	3.24713e-06	0.00274884	0.176939
P-value	Faecalibacterium prausnitzii 3 ( L2-6)	0.000218694	1.29747e-93	4.72431e-08	1.67736e-10	0.0714915	0.883308	0.00624765	0.781292	0.105662	0.00354056	0.00257804	9.61409e-14	0.125893	4.9264e-05	0.355725	5.58406e-06	0.883747	5.7068e-17	4.70988e-58
P-value	Faecalibacterium prausnitzii 4 (cf. KLE1255)	0.598876	6.68349e-16	0.523729	3.4098e-06	0.42196	0.624931	0.349835	3.58906e-05	0.0835154	0.00375154	0.000409112	3.01976e-08	0.516627	0.330488	0.18046	7.41957e-05	0.707763	9.98218e-07	2.66943e-08
P-value	Faecalibacterium prausnitzii 5	0.0485422	3.11457e-22	8.37385e-15	1.3141e-52	0.526128	2.30142e-13	8.93945e-05	0.00330664	0.00304122	0.218746	2.03607e-93	2.91487e-239	4.66856e-55	0.122089	2.58403e-09	1.85244e-13	0.76163	4.00315e-05	0.139923
P-value	Faecalibacterium prausnitzii 6	0.0477293	7.83456e-133	2.00023e-14	2.68791e-31	0.077434	0.000188931	0.784711	0.0784749	3.72011e-12	6.36889e-13	2.25634e-11	2.0273e-45	1.35482e-06	0.637125	1.70263e-08	5.38072e-05	0.000316315	1.17488e-08	1.17306e-98
P-value	Faecalibacterium prausnitzii 7	0.0521645	9.17325e-90	0.0249035	1.23051e-18	0.117889	0.247399	9.25828e-06	0.102771	1.46421e-12	0.00177863	5.12544e-16	7.86713e-09	2.66728e-06	0.477956	0.827919	4.81482e-05	0.861274	0.198393	1.81062e-22
P-value	Faecalibacterium sp. CAG:1138	0.0041499	0.134652	3.28697e-66	0.56965	0.935854	0.752877	0.671288	0.748966	0.623464	0.771385	1.69808e-13	0.671288	0	0.880296	5.33809e-11	6.75023e-134	0.876126	0.504244	0.210518
P-value	Faecalibacterium sp. CAG:74	0.00556659	0.0758454	4.94316e-11	2.29422e-08	0.0742654	0.0202279	0.00179411	0.796369	3.79473e-11	0.176562	0.582587	8.20216e-10	4.2555e-08	0.241523	1.0293e-09	4.37549e-05	0.276665	8.9806e-41	3.51652e-08
P-value	Faecalibacterium sp. CAG:82	0.327135	1.46781e-36	1.73238e-07	5.14486e-10	0.759378	5.01279e-06	0.228826	8.56718e-05	4.93812e-08	5.12109e-11	5.54934e-18	4.49765e-53	0.00016111	0.562494	3.36607e-11	0.00255035	0.000747131	1.19632e-05	2.98933e-10
P-value	Faecalicatena contorta	1.03718e-09	0.628299	0.000346139	2.27847e-07	0.0592892	1.77151e-13	0.000339082	0.0102761	0.956138	0.711803	7.58632e-06	0.0927163	0.0116261	0.972167	0.000437999	0.0289179	0.103549	4.82161e-40	0.00155667
P-value	Faecalicatena fissicatena	2.71438e-12	0.595529	0.478468	0.0744332	0.751257	0.695682	0.0946331	0.207579	0.420753	0.252501	0.0916191	0.286363	0.341348	0.553134	0.568606	0.410045	0.539285	0.780747	0.862495
P-value	Faecalicoccus pleomorphus	0.729013	1.37408e-15	0.147779	0.000517625	0.623434	0.0018364	0.0286511	0.795862	0.478201	0.572237	0.0278954	0.0308235	0.140521	0.358286	0.263789	0.201936	0.89826	0.309839	3.26362e-05
P-value	Faecalitalea cylindroides	0.0619026	0.82785	2.75212e-10	1.26978e-05	0.516613	4.19162e-13	0.000623295	0.214441	0.0392027	0.658771	0.000554421	0.000623295	0.0515425	0.112572	0.000150213	0.0918669	0.209084	1.96333e-18	0.00316877
P-value	Faecalitalea sp. UBA637	0.0677794	1.14907e-08	6.09257e-06	2.40803e-107	0.270393	0.109018	0.0499637	0.549237	0.79907	2.63603e-10	1.57662e-57	6.07751e-45	2.86768e-23	0.0391932	0.784439	6.14708e-15	4.26133e-07	0.00321107	2.01667e-07
P-value	Fenollaria massiliensis	0.955249	0.121117	0.250692	0.120858	0.649349	0.0753059	0.0499374	0.0706489	0.943579	0.7969	0.124718	0.0509964	0.0988659	0.701019	0.867547	0.237343	0.378563	2.3614e-05	0.525375
P-value	Firmicutes bacterium CAG:102	0.00119123	1.22692e-49	0.0109487	1.26573e-06	0.39476	0.354577	8.74368e-14	0.181911	0.330989	0.978519	0.0757098	1.57393e-15	0.980297	0.75912	0.218785	0.0325997	7.60484e-06	2.48999e-06	1.2406e-28
P-value	Firmicutes bacterium CAG:103	0.730353	8.30396e-14	0.223945	0.843222	0.0767592	0.114588	0.29291	0.638431	1.92676e-05	0.200505	1.15087e-10	1.5767e-25	0.000906585	0.437496	0.391121	2.22511e-05	0.0818501	0.020691	1.40364e-15
P-value	Firmicutes bacterium CAG:110	0.170098	2.50395e-22	2.84431e-17	1.06621e-26	0.117482	0.00678627	0.0351078	0.267843	1.75055e-05	0.805126	0.0128781	7.81382e-28	4.11319e-13	0.0802099	1.20825e-06	2.24219e-09	0.0286586	3.35547e-28	0.351158
P-value	Firmicutes bacterium CAG:114	0.24315	0.509629	3.66245e-06	1.46339e-23	0.0640599	0.812843	5.48866e-19	0.0316474	5.60148e-05	0.157679	6.28697e-22	0.00142167	2.69482e-08	0.450263	0.032087	1.484e-06	0.835939	0.000167612	1.90169e-08
P-value	Firmicutes bacterium CAG:124	0.447029	1.09016e-07	0.000137263	2.4579e-16	0.102592	0.0653262	0.958712	0.0110596	1.5253e-12	0.524428	0.000221169	4.92085e-29	1.54828e-11	0.00669495	5.73164e-10	3.67468e-07	0.887227	9.77157e-11	0.387909
P-value	Firmicutes bacterium CAG:129	0.0393216	5.09494e-33	2.78548e-13	5.96803e-18	0.439956	0.114879	0.000598816	0.651256	1.50501e-11	0.119502	0.00824463	1.60187e-42	3.22405e-13	0.994151	1.30912e-06	4.04731e-08	0.844943	6.85658e-22	6.68576e-05
P-value	Firmicutes bacterium CAG:145	1.37616e-14	5.27099e-45	2.21151e-08	8.30547e-13	0.762679	3.27176e-11	1.87334e-08	1.20669e-08	0.00163451	0.824824	1.38205e-08	5.48527e-08	0.00138454	6.59702e-05	3.2544e-20	0.0184051	0.0391129	3.05744e-67	4.91319e-35
P-value	Firmicutes bacterium CAG:170	0.830485	0.0147969	1.30126e-24	8.12938e-87	0.354373	0.00831262	8.06079e-09	0.563501	0.00593882	0.499651	3.95266e-13	3.15627e-83	2.56849e-31	0.340862	5.19253e-06	2.99879e-28	0.125258	2.04467e-11	2.73698e-19
P-value	Firmicutes bacterium CAG:176	0.24967	1.27219e-29	2.23641e-19	3.86434e-40	0.182238	0.000165092	0.00182053	0.0118585	4.27755e-08	0.000837051	2.57614e-11	5.25398e-53	8.66266e-14	0.0520737	1.00984e-09	2.11982e-08	0.854903	5.1338e-54	0.303269
P-value	Firmicutes bacterium CAG:176_63_11	0.365933	1.97973e-10	4.60432e-12	6.72154e-10	0.0372294	0.0807261	0.0311915	0.0451124	0.00017089	0.319554	0.00379567	1.13872e-48	2.75002e-12	0.856233	9.54939e-08	7.45927e-10	0.0762039	2.76209e-26	0.082832
P-value	Firmicutes bacterium CAG:194	0.992675	2.76733e-29	1.11216e-20	6.63857e-112	0.386438	0.207582	0.704135	0.548892	1.39989e-06	0.112852	2.77456e-16	3.28611e-66	1.83826e-12	0.397674	5.70106e-05	1.13144e-24	0.0430876	0.000818468	0.00458905
P-value	Firmicutes bacterium CAG:212 / Clostridium sp. 2789STDY5834871	0.751566	1.02473e-16	0.376261	6.41864e-87	0.157882	0.59546	0.0951621	0.00210265	2.88595e-05	0.0138163	1.02788e-12	3.68005e-17	2.96178e-07	0.908436	0.839345	1.0848e-09	2.42342e-11	0.77533	4.33724e-38
P-value	Firmicutes bacterium CAG:227	0.595459	1.49443e-69	0.000748824	0.0680105	0.143904	0.378464	3.28387e-14	7.63616e-05	0.0858125	0.563929	0.187195	0.00230384	0.000231864	0.734031	0.0137672	6.34251e-07	1.6497e-08	0.0136516	1.29132e-29
P-value	Firmicutes bacterium CAG:238	0.0583464	1.15366e-05	5.6763e-89	2.20156e-23	0.589429	4.51015e-11	0.594201	0.103604	0.00819947	0.7788	0.621375	1.19904e-19	2.82881e-31	0.0290302	8.07096e-19	6.91485e-53	0.29595	5.93981e-47	4.00505e-09
P-value	Firmicutes bacterium CAG:24 / Clostridium sp. 2789STDY5834869 & 2789STDY5834922	0.00627666	3.6139e-18	8.31097e-16	5.62406e-05	0.140494	0.00368297	0.000251069	0.00345934	6.93316e-09	0.0191084	0.190143	0.208021	0.187628	0.229973	1.31023e-06	9.16145e-05	0.613223	0.0036702	7.65521e-16
P-value	Firmicutes bacterium CAG:240	0.000318132	1.50188e-10	5.3533e-58	0.0022413	0.437782	6.44838e-14	0.424681	0.0556369	0.0100964	0.092734	0.0139906	0.227421	6.45723e-30	0.836327	8.9911e-22	6.45106e-28	0.472646	2.64651e-83	0.000268403
P-value	Firmicutes bacterium CAG:272	0.669045	3.36167e-11	3.87738e-35	1.21032e-69	0.565503	4.60343e-05	0.392481	0.864452	0.00378596	0.290076	1.39742e-16	9.95679e-37	3.29218e-62	0.282269	3.00758e-12	4.14356e-59	0.859204	1.5722e-23	2.86668e-05
P-value	Firmicutes bacterium CAG:313	0.851162	4.65741e-09	4.32362e-37	9e-146	0.540112	1.07555e-05	0.00100964	0.114427	0.00158355	0.0811349	1.35383e-23	1.74049e-35	1.26263e-11	0.00511251	8.89234e-07	0.000183762	0.790192	0.000180861	4.92445e-06
P-value	Firmicutes bacterium CAG:321	0.221504	0.00382588	2.14158e-06	3.00709e-14	0.304059	4.40488e-07	0.5757	0.167084	0.000198335	0.822056	4.575e-09	0.325082	4.05054e-11	0.0259763	0.46255	2.08494e-05	0.414306	9.59561e-22	0.000510376
P-value	Firmicutes bacterium CAG:341	0.0566363	0.000293335	0.00426057	0.00319612	0.33912	0.348584	0.00588322	0.124439	2.09483e-06	0.825273	6.38482e-09	0.706512	0.899524	0.0736942	0.905203	0.232992	0.889848	0.000460197	1.46887e-06
P-value	Firmicutes bacterium CAG:345	0.7893	2.04797e-10	4.13463e-72	5.63859e-132	0.633527	0.00663341	1.8975e-05	0.174055	0.00362078	0.0852186	1.00994e-86	0.394603	2.52202e-27	0.372377	3.24785e-05	0.66518	2.87621e-06	5.00016e-06	0.000348245
P-value	Firmicutes bacterium CAG:41 / Clostridium sp. 2789STDY5834935 & sp. 2789STDY5608853	1.56092e-13	1.18599e-14	0.0223344	2.25437e-45	0.840179	1.32133e-06	2.04774e-18	0.321197	0.00206934	0.778055	8.17945e-37	6.38025e-20	4.80402e-10	0.184746	1.89482e-10	2.28946e-13	0.137595	4.17532e-07	4.93353e-06
P-value	Firmicutes bacterium CAG:424	0.793349	0.00222037	0.50692	0.00506221	0.691676	0.673321	0.0364988	0.114852	0.122189	0.152238	0.0347991	0.565129	0.233869	0.531896	0.0419928	0.302685	0.442455	0.575582	4.73462e-12
P-value	Firmicutes bacterium CAG:449	0.598951	3.22825e-11	0.000245494	2.84174e-231	0.663104	0.63223	2.65511e-07	0.0832675	0.023752	0.80094	1.6636e-56	0.0253851	2.15255e-30	0.621529	0.774445	1.33113e-09	0.00434017	0.955212	0.213082
P-value	Firmicutes bacterium CAG:460	0.599762	6.63136e-08	1.73508e-51	9.48619e-17	0.742899	2.02341e-09	0.0556658	0.599701	0.136975	0.00138979	0.000292476	0.968327	1.20574e-07	1.23274e-05	0.000135777	3.4797e-07	0.525255	1.80082e-20	0.365995
P-value	Firmicutes bacterium CAG:475	0.0680568	3.93031e-11	2.24197e-28	5.98265e-48	0.700211	0.920368	0.0016393	0.883623	0.0188122	0.164534	1.2078e-36	0.618911	5.24271e-07	0.47128	4.79635e-07	1.53541e-16	0.455853	5.87767e-18	0.451251
P-value	Firmicutes bacterium CAG:534	0.323035	1.87688e-06	1.22225e-15	0.000281038	0.798876	0.297849	7.97649e-07	0.311047	0.120101	0.0153041	1.09178e-15	0.179104	4.73057e-84	0.633551	8.72137e-06	1.27924e-129	0.621678	4.67309e-07	0.322792
P-value	Firmicutes bacterium CAG:536	0.661178	0.00614493	0.00119795	1.80767e-64	0.749955	0.210813	0.0928587	0.648014	0.449068	0.249939	0.0898745	3.72637e-178	3.5849e-08	0.550986	9.65099e-07	0.407513	0.537089	0.0254305	0.00262714
P-value	Firmicutes bacterium CAG:552	0.263606	2.84621e-06	3.2064e-69	0.0469473	0.778571	0.0887005	0.138171	0.263606	0.0862865	0.31008	0.0478858	2.71601e-08	3.74004e-14	0.153195	5.91014e-15	3.27113e-32	0.586055	3.50928e-25	0.71201
P-value	Firmicutes bacterium CAG:555	0.7305	0.000293766	1.83869e-33	0.563421	0.830272	0.401763	0.495263	0.732692	0.598648	0.00148197	1.30325e-07	0.258387	4.18089e-90	0.68838	5.33239e-12	1.2033e-102	0.678042	2.85141e-15	0.246921
P-value	Firmicutes bacterium CAG:582	0.967688	1.93887e-11	3.15781e-11	5.286e-65	0.71274	0.00407687	1.72066e-13	0.143244	0.0759776	0.009839	2.32386e-69	8.33758e-05	1.11557e-50	0.490912	0.388951	0.919093	0.475817	1.04015e-07	0.383187
P-value	Firmicutes bacterium CAG:631	0.39934	0.000356395	2.47498e-20	0.134223	0.832118	0.00455795	0.263679	0.712195	0.611992	0.0598707	0.259286	0.263679	0.524558	0.691642	0.633436	0.581674	0.681399	1.2585e-06	0.00473487
P-value	Firmicutes bacterium CAG:646	0.796854	0.366289	0.120793	0.0412127	0.772654	0.810621	0.127666	0.250714	0.0641777	0.296977	0.124179	0.399937	0.385819	0.588825	0.279022	0.452745	0.575807	0.55626	0.0125721
P-value	Firmicutes bacterium CAG:65 / Clostridium sp. 2789STDY5608883	0.0117454	0.0965833	3.20047e-12	4.4344e-32	0.82073	0.873772	0.0037355	0.241992	0.000548141	0.555834	0.0157965	1.12918e-20	0.0966784	0.703871	0.485944	0.0700386	0.606033	0.555721	1.71178e-11
P-value	Firmicutes bacterium CAG:791	0.173303	5.90472e-10	0.0658736	0	0.731983	0.563554	0.935027	0.173303	0.111273	0.216318	9.59951e-132	1.80144e-278	9.33387e-103	0.521657	0.639146	3.23049e-89	0.507143	0.0138196	4.00285e-06
P-value	Firmicutes bacterium CAG:822	0.000835826	0.186015	8.59537e-08	0.615186	0.943275	0.780731	0.707505	0.777234	0.664244	4.54238e-15	0.704926	0.707505	0.830847	0.894079	0.789742	0.853269	0.890383	4.74739e-36	0.268313
P-value	Firmicutes bacterium CAG:83	0.395257	0.347167	0.107908	6.23438e-05	0.00757404	0.0681269	0.147973	0.42261	9.48177e-05	0.000433171	6.59081e-20	5.14082e-20	0.888253	0.207089	0.0443977	0.031687	0.123317	3.0738e-08	0.1282
P-value	Firmicutes bacterium CAG:882	0.21869	0.290609	0.112284	6.88496e-59	0.645746	0.236979	0.505177	0.205378	0.0146985	0.77023	1.66766e-74	0.894721	1.37745e-59	0.389758	0.611214	6.45731e-07	0.373329	0.00662012	5.3664e-06
P-value	Firmicutes bacterium CAG:884	0.204059	0.00950437	5.57994e-72	6.50359e-25	0.889189	0.585738	0.5121	0.579616	0.395393	0.614976	8.64352e-29	0.46256	1.97061e-131	0.79433	0.155554	2.57574e-172	0.787279	0.465603	0.0300534
P-value	Firmicutes bacterium CAG:94	1.03291e-06	3.45876e-51	5.71853e-34	2.78729e-09	0.344757	5.07296e-10	2.16317e-06	1.79102e-17	7.32725e-08	0.038172	4.83301e-07	2.1417e-06	0.00456344	0.656775	3.19862e-33	0.0140648	0.0672778	2.95799e-86	6.72147e-31
P-value	Firmicutes bacterium CAG:95	0.0908167	0.115472	2.89856e-22	1.37118e-20	0.128957	0.053605	0.383416	0.0502419	3.11278e-09	0.986826	2.18365e-20	1.08195e-09	1.09736e-08	0.523727	4.91881e-12	3.60027e-16	0.0163232	0.00120064	1.10602e-05
P-value	Flavonifractor plautii	2.99656e-07	1.15321e-47	5.0588e-22	1.04379e-67	0.0271456	8.23198e-05	2.45848e-16	0.149001	1.39586e-16	0.240964	4.22307e-64	0.278461	1.21152e-20	0.00182141	3.38115e-10	2.134e-16	0.00111328	1.66091e-18	0.00174554
P-value	Flavonifractor sp. 2789STDY5834895 & sp. 2789STDY5834937 / Clostridium sp. 2789STDY5608878	1.20187e-06	1.86026e-68	0.87629	1.1393e-41	0.362038	0.357256	3.78292e-25	0.000164376	0.849226	0.596987	1.04212e-28	1.00679e-05	4.0986e-10	0.949027	0.432406	6.28114e-08	0.00439048	0.00937551	7.10726e-165
P-value	Flavonifractor sp. 2789STDY5834931	0.00116189	0.00405502	7.12072e-06	7.18466e-20	0.922831	0.00354432	1.60537e-11	0.792917	5.8307e-07	0.0058029	9.40566e-13	0.0442605	5.81697e-05	0.911354	0.00140573	0.000500767	0.0335402	1.32022e-06	0.000166533
P-value	Flavonifractor sp. An10	0.00296306	4.52104e-07	7.44248e-23	0.633137	0.720321	0.0215044	0.0590311	2.21067e-11	0.0862289	0.0629122	0.0567232	0.0590311	0.282498	0.50294	8.40112e-07	0.352114	0.488063	1.6642e-08	0.037675
P-value	Fournierella massiliensis	0.316228	0.346886	0.175828	0.0748958	0.800972	0.324088	0.81503	0.0372525	1.30006e-34	0.362807	0.179755	0.818028	0.449223	0.637171	0.895562	0.512362	0.625395	0.110933	0.192697
P-value	Fusicatenibacter saccharivorans	8.84069e-12	7.40037e-05	3.85489e-07	7.93693e-16	0.915383	5.03148e-06	6.35256e-33	3.32627e-09	0.0164847	2.21407e-17	5.45361e-19	7.824e-07	0.0532663	0.00597853	3.12401e-21	0.932206	0.192634	7.59278e-40	6.0344e-17
P-value	Fusobacterium gonidiaformans	0.392189	0.0171849	0.527135	1.77759e-16	0.829596	0.722695	0.256465	0.730811	0.189239	0.598316	0.00065543	0.256465	0.356633	0.0348356	0.65906	0.204055	0.676814	4.1744e-10	0.241759
P-value	Fusobacterium mortiferum	0.000894963	3.36361e-274	7.15497e-06	0.00161379	0.403561	0.00334576	0.00499331	0.000894963	0.0447957	0.00256317	8.1395e-05	0.999082	0.0964078	0.478444	0.00174618	0.029938	0.89334	4.16369e-11	3.79515e-30
P-value	Fusobacterium necrophorum	0.93314	0.695068	0.909781	0.881499	0.983195	0.934215	0.911407	0.93314	0.897581	0.93928	1.77951e-146	0.911407	0.949498	3.60385e-157	0.93698	0.956271	0.967414	0.861008	0.742779
P-value	Fusobacterium nucleatum subsp. animalis	0.427639	5.80565e-09	0.0456346	0.0251496	0.709764	0.443361	0.151056	0.441625	0.000647203	0.859621	0.346936	0.36907	0.854705	0.000158682	0.163154	0.894843	0.471043	0.825287	0.000873854
P-value	Fusobacterium nucleatum subsp. polymorphum	0.524289	0.00573821	0.389781	0.257879	0.872757	0.530994	0.398417	0.524289	0.000768472	0.563151	0.394067	0.398417	0.630686	0.764437	0.548434	0.67723	0.756423	0.593548	0.17157
P-value	Fusobacterium periodonticum	0.218153	0.688993	0.09624	0.0866696	0.756759	0.225661	0.102416	0.218153	1.38783e-05	0.85293	0.0992776	0.317672	0.352493	0.562238	0.24581	0.420824	0.548594	0.0101221	0.15323
P-value	Fusobacterium sp. CAG:439	2.01627e-06	0.00232006	1.31658e-55	0.186358	0.851622	0.520647	0.324013	0.000803247	0.813961	0.000116806	0.319557	0.324013	0.57447	0.0106906	0.463761	0.626873	0.717158	7.27542e-20	0.366623
P-value	Fusobacterium ulcerans	0.0558328	5.34672e-38	0.00978352	0.000672564	0.630535	0.19711	0.0111939	0.17109	2.74381e-13	0.0825006	0.0104648	0.0111939	0.148799	0.368175	0.0715033	0.21129	0.351598	0.00161396	4.82465e-07
P-value	Fusobacterium varium	0.02693	0	0.00279767	0.000722216	0.577898	0.0294902	0.0107873	0.02693	0.876957	0.0445472	0.0243521	0.00333586	0.0948417	0.297816	0.0370541	0.148117	0.281174	3.70513e-06	7.96446e-17
P-value	Gemella sanguinis	5.83375e-19	9.61207e-36	0.0920392	0.068273	0.401248	6.75686e-35	0.00246809	0.00359784	8.45348e-23	0.0142633	0.00216547	3.28606e-05	0.100647	0.218859	0.0195385	0.0291385	0.318634	0.927689	3.84512e-23
P-value	Gemmiger formicilis	0.0310114	0.892464	0.593351	0.0708926	0.0441638	0.48844	0.0240679	7.8684e-05	0.075377	0.00395509	9.7888e-05	7.99735e-10	0.469653	0.435728	1.41438e-05	0.000383238	0.535627	4.91957e-05	0.0072592
P-value	Gordonibacter sp. An232A / Coriobacteriaceae bacterium CHKCI002	7.66973e-38	1.85516e-05	0.682456	0.105372	2.45819e-05	0.815992	0.720217	4.0441e-09	0.408865	1.0328e-07	0.222572	0.226842	0.49144	0.668037	0.13152	0.551382	0.657114	5.58072e-226	0.0155798
P-value	Gordonibacter urolithinfaciens	3.41823e-17	0.000591894	0.00211203	3.81401e-22	0.151512	2.1176e-06	7.44425e-09	0.000235129	0.0075334	8.91493e-10	1.13204e-12	0.854379	1.6623e-05	0.764952	8.5316e-05	0.000193149	0.0190322	1.31393e-50	0.119386
P-value	Granulicatella adiacens	6.9356e-10	1.11586e-20	0.0113959	0.0864186	0.63757	7.10539e-06	0.110353	0.187857	1.90976e-14	0.630811	0.0676775	0.237627	0.15732	0.37809	0.230854	0.220816	0.796281	0.0527548	5.03255e-09
P-value	Haemophilus parahaemolyticus	0.427113	0.00025044	0.283445	0.0168756	0.841678	0.599436	0.364746	0.427113	0.175796	0.488418	1.20039e-06	0.93946	0.548775	0.708606	0.454192	0.603667	0.698866	0.0973732	0.00707523
P-value	Haemophilus parainfluenzae	2.39758e-11	1.02236e-20	0.0908017	0.0551063	0.912359	0.0270387	0.00699862	0.000216199	1.39097e-11	0.63876	2.17541e-07	0.00089674	0.25366	0.330366	2.41661e-05	0.738723	0.00525845	3.78202e-09	5.75454e-16
P-value	Haemophilus paraphrohaemolyticus	0.281012	1.06096e-18	0.145359	0.410385	0.786271	0.288835	0.144803	0.281012	0.304816	0.327648	0.00370914	0.152785	0.673449	0.611922	0.980112	0.480986	0.156706	0.0243911	0.0010531
P-value	Haemophilus pittmaniae	0.865931	0.00476114	0.539532	0.000233612	0.783776	0.397758	0.479999	0.0831944	0.295719	0.32189	0.144215	0.981355	0.410116	0.607668	0.325038	1.24125e-34	0.595119	0.176866	0.000605998
P-value	Haemophilus sp. CCUG 66565	0.464366	0.916513	0.323036	0.193554	0.853985	0.471593	0.92894	0.464366	3.61549e-11	0.0164049	0.0279829	0.33187	0.58065	0.730595	0.490462	0.632436	0.721523	0.402075	0.855194
P-value	Haemophilus sputorum	0.349392	0.00247987	0.649739	0.0963274	0.813921	0.357211	0.675376	0.349392	0.151065	0.722405	4.2548e-08	0.675259	0.458729	0.659663	0.37782	0.540727	0.648505	0.759024	0.0848868
P-value	Hafnia paralvei	0.956742	0.493117	0.585898	0.0824385	0.80583	4.46171e-11	0.194944	9.85565e-08	0.411661	0.374886	0.190844	0.194944	0.4606	0.645582	0.357033	0.522926	0.102053	0.231665	0.506919
P-value	Helicobacter winghamensis	0.904248	0.574072	0.87093	0.83075	0.975882	0.905784	0.873245	0.904248	0.853573	0.913021	0.872083	0.873245	0.927632	0.954863	0.909734	0.937324	0.953279	0	0.637957
P-value	Holdemanella biformis	0.254871	0.401545	0.000155281	3.75233e-154	0.367802	0.971517	0.576026	0.0641845	0.163598	0.354542	1.30129e-71	5.62564e-43	1.23493e-26	0.329483	0.130477	2.19836e-14	1.30707e-21	3.12982e-07	9.4858e-12
P-value	Holdemania filiformis	0.235119	1.04256e-13	0.017269	9.98065e-49	0.96097	0.366106	1.80876e-24	0.000774821	0.021587	0.00301384	5.28686e-30	1.80447e-09	8.00165e-11	0.535304	0.0173835	1.83078e-08	0.0017374	0.0183701	0.252929
P-value	Holdemania massiliensis	0.985416	1.68435e-24	0.0217856	1.28484e-07	0.232417	0.258122	0.239391	0.366622	0.00905413	0.823148	2.06722e-09	8.54249e-05	0.000336982	0.325209	0.0585594	0.00191076	0.245721	0.210547	1.35218e-06
P-value	Holdemania sp. Marseille-P2844	1.49475e-06	4.21973e-23	3.91447e-05	3.28579e-05	0.246788	1.31378e-09	0.000514773	0.214736	0.0220257	0.00124799	0.000456358	0.00154694	0.0481188	4.65698e-05	0.0440574	0.0870683	0.202294	1.46616e-88	3.89607e-15
P-value	Hungatella hathewayi 1	0.0218811	0.000172823	0.590019	9.15298e-12	0.231772	0.002887	1.87791e-08	0.190497	0.103919	0.0136341	4.36968e-12	0.153069	5.84168e-05	0.335984	0.0164797	0.000502385	0.00952326	0.00337339	0.108006
P-value	Hungatella hathewayi 2	0.148572	2.06012e-76	0.000500744	4.81319e-24	0.00161373	0.288891	4.48658e-06	0.246586	0.00019545	0.0644649	2.48576e-16	0.0977901	2.38382e-05	0.265057	0.0279935	0.000268929	0.0735924	0.00028642	1.77648e-23
P-value	Intestinibacter bartlettii	0.00148368	8.78933e-54	0.62385	0.905489	0.540226	2.44815e-05	3.9292e-12	0.848928	0.0367275	6.06339e-10	1.79861e-26	1.86578e-14	0.0291594	0.685534	1.40694e-10	0.567583	0.00991285	9.06699e-20	3.54419e-71
P-value	Intestinimonas butyriciproducens	0.000189955	7.39967e-06	0.0473207	3.04673e-23	0.0736866	0.0653984	7.48125e-12	0.190691	0.734333	0.0632508	9.04351e-26	0.0101618	5.79162e-08	0.41941	0.290702	8.79884e-07	0.0269149	2.85562e-07	1.72112e-16
P-value	Intestinimonas massiliensis	0.801899	3.9979e-17	0.00222741	1.9623e-08	0.222556	0.0109115	6.54802e-10	0.0167849	0.095636	0.864301	3.38513e-10	0.148152	0.0454665	0.578179	2.25617e-12	0.0168266	0.057542	8.51313e-41	3.29176e-12
P-value	Klebsiella aerogenes	0.0269834	5.23971e-28	0.00280726	0.0969962	0.57803	0.482315	0.00131338	0.0892313	0.545628	0.0446217	0.707317	0.00969108	0.0949571	0.297984	0.0371202	0.458436	0.30771	0.000102252	5.07917e-08
P-value	Klebsiella michiganensis 1	0.900357	5.48161e-21	0.0351934	0.494641	0.637591	0.212602	0.236874	0.188248	0.564837	0.839136	0.613818	0.223724	0.157345	0.378119	0.552709	0.220845	0.802893	0.441384	4.05294e-08
P-value	Klebsiella michiganensis 2	0.792961	2.59112e-16	0.069427	0.976582	0.624	0.825494	0.352523	0.0512969	0.010639	0.234102	0.489844	0.446569	0.453413	0.359069	0.110573	0.202671	0.906532	0.498307	4.81609e-08
P-value	Klebsiella oxytoca	0.792546	1.24587e-09	0.987324	0.311633	0.739632	0.617762	0.248603	0.588308	0.000982897	0.230239	0.00346499	0.577857	0.98933	0.534069	0.675643	0.387736	0.331963	0.116768	0.000365117
P-value	Klebsiella pneumoniae	2.27311e-06	8.50782e-245	9.35128e-12	7.11789e-50	0.0937434	2.55163e-07	5.25538e-16	3.3798e-06	0.00536597	0.000369463	0.840038	0.360913	0.00539568	0.0017137	5.03858e-06	0.730496	0.054111	7.07806e-29	7.01376e-113
P-value	Klebsiella quasipneumoniae	0.008259	1.05428e-61	0.000386666	2.81047e-150	0.354475	0.000291241	4.65856e-11	0.000231081	0.0302583	0.00727066	0.0418372	0.000203716	3.20244e-14	0.0831943	0.0117081	0.0161031	0.230771	3.95823e-13	6.10392e-39
P-value	Klebsiella variicola	0.0139608	2.33761e-32	0.000517315	3.50061e-87	0.375362	0.000523458	0.000182585	0.0045879	0.500241	0.00384069	2.52837e-06	0.000727149	1.0905e-12	0.0971973	0.00352727	0.177668	0.269694	6.25378e-11	6.1643e-24
P-value	Kluyvera georgiana	0.278188	3.83797e-17	0.143003	4.30177e-08	0.785043	0.286004	0.990673	0.278188	0.821953	0.324806	0.00426955	0.150381	0.654283	0.609827	0.306782	0.478406	0.597333	0.0235627	2.02487e-05
P-value	Lachnoanaerobaculum saburreum	0.501201	0.119818	0.832298	0.232033	0.865658	0.508122	0.372391	0.501201	1.77414e-07	0.541384	0.367984	0.806379	0.611571	0.751599	0.526147	0.660166	0.743179	0.512019	0.026677
P-value	Lachnoclostridium phytofermentans 2	0.726246	0	0.636297	0.533886	0.92983	0.730483	0.642414	0.726246	0.591158	0.750551	0.63934	0.642414	0.791508	0.869125	0.741417	0.818964	0.864573	0.464967	0.170652
P-value	Lachnoclostridium sp. An118	0.652045	0.452495	0.310301	0.0306246	0.759642	0.02604	0.756086	0.61793	0.000126199	0.269388	0.103482	0.106686	0.358414	0.567029	0.251633	0.426528	0.553495	0.0654696	0.810654
P-value	Lachnoclostridium sp. An138	0.937275	2.61707e-12	6.62154e-13	7.93484e-06	0.29183	0.00469255	0.000866583	3.16983e-08	0.00264098	2.88712e-05	0.000775277	0.00277777	0.0580417	0.0111661	4.68525e-05	0.100797	0.221393	0.867129	1.16451e-23
P-value	Lachnoclostridium sp. An14	0.439202	0.00134181	0.939678	0.169272	0.845733	0.560222	0.304949	0.0626106	1.32256e-12	0.482445	0.300496	0.304949	0.559191	0.715832	0.465983	0.61309	0.70631	0.106376	4.21329e-14
P-value	Lachnospira sp. 2789STDY5834967 / Clostridiales bacterium KLE1615 & 41_12_two_minus	0.631474	0.365029	1.11067e-22	0.00947823	0.190036	6.20228e-07	1.60745e-28	1.05687e-05	0.233302	1.36857e-22	1.36546e-06	8.58437e-17	0.0124443	4.91256e-05	9.66337e-21	1.94744e-08	3.48174e-05	4.28193e-12	8.44365e-06
P-value	Lachnospiraceae bacterium 2_1_46FAA	0.359372	8.51812e-55	0.0336419	0.00517833	0.692439	0.121791	0.0369905	0.115802	0.487164	0.153311	0.0352757	0.0369905	0.235092	0.45926	0.138305	0.303949	0.443646	0.00101787	1.25278e-05
P-value	Lachnospiraceae bacterium TF01-11 / Clostridium sp. CAG:122	0.0507012	1.3316e-15	7.39921e-12	0.0158282	0.183174	0.10998	0.0105639	0.934793	6.77569e-09	0.00521436	0.87084	0.313972	0.117961	0.565243	0.000182405	0.0321733	0.139229	0.24602	9.52328e-13
P-value	Lactobacillus acidophilus	0.0117602	0.00192915	0.0295804	0.10916	0.82062	0.792885	0.588705	0.36733	0.522609	2.86567e-05	0.227572	0.605097	0.496098	0.671387	6.88804e-05	0.555658	0.66056	6.93585e-49	0.596004
P-value	Lactobacillus agilis	0.896473	0.543215	0.860497	2.38738e-12	0.973911	0.898132	1.20281e-12	0.896473	0.841771	0.905952	0.861741	0.862996	0.921742	0.95118	0.9024	0.932218	0.949468	0.785971	0.610769
P-value	Lactobacillus amylovorus	4.4029e-27	0.0644522	0.328697	0.230495	0.855665	0.476765	0.913139	0.469579	0.450387	0.511416	2.24858e-19	0.337526	0.00152795	0.00810271	0.495522	0.636401	0.72463	0.50933	0.00458764
P-value	Lactobacillus casei == paracasei	1.24002e-30	0.00013413	0.447227	0.0116771	0.0273691	2.04055e-22	0.095784	0.00372237	5.21179e-05	4.28439e-12	0.000197405	0.225713	0.217944	0.0470597	9.68739e-08	0.286118	0.42669	1.75694e-22	0.163031
P-value	Lactobacillus crispatus	0.402487	0.0448363	0.0253351	0.49745	0.677134	0.743763	0.0778687	0.304082	0.654827	0.60957	0.749202	0.0281094	0.211346	0.435958	0.380002	0.279191	0.60928	0.0274804	0.000206573
P-value	Lactobacillus delbrueckii	6.71491e-51	0.000302634	0.407619	0.175983	1.20804e-16	6.5669e-51	2.81835e-11	0.00330806	0.030134	3.46688e-17	0.0568869	1.48478e-26	0.282816	0.407128	1.92748e-37	0.837965	0.488351	1.25241e-21	0.000349482
P-value	Lactobacillus farciminis	1	1	1	1	1	1	1	1	1	1	1	1	1	1	1	1	1	1	1
P-value	Lactobacillus fermentum	7.71394e-19	0.112508	0.0206509	0.5486	0.666539	0.0399745	0.0720124	0.158391	2.63987e-11	0.00095643	0.669699	1.39506e-05	1.02982e-05	0.591015	0.733298	0.872869	0.683548	0.150463	0.000223423
P-value	Lactobacillus gallinarum	0.745998	0.737931	0.661754	0.195362	0.93507	0.749952	0.667504	0.00472066	0.619219	0.768666	0.664615	1.00476e-24	0.80679	1.19077e-10	0.760151	0.832303	0.874622	0.333712	0.204983
P-value	Lactobacillus gasseri 1	1.28418e-58	0.0443277	0.276209	0.151983	0.83931	6.65751e-28	0.394188	0.0834836	0.216118	0.521516	0.28056	0.284993	0.542732	0.704394	3.96377e-06	0.59819	0.694529	3.60884e-12	0.421035
P-value	Lactobacillus gasseri 2	3.55792e-14	0.463022	0.784602	0.40125	0.722872	2.55971e-26	0.00720178	0.00236466	1.65037e-10	0.0517181	0.141185	0.830117	0.925064	0.389904	0.0102824	0.356716	0.492213	9.30065e-06	1.67301e-05
P-value	Lactobacillus johnsonii	0.523734	4.32697e-05	0.3175	0.188477	0.852325	0.501628	0.0289702	0.459243	0.256164	0.50158	0.321881	0.326337	0.576305	0.0100337	0.485485	0.628525	0.718455	0.873883	0.0510632
P-value	Lactobacillus mucosae	0.833893	1.38176e-38	0.00268635	0.00793261	0.576324	0.17554	0.113887	0.0263041	0.273099	0.750677	1.44898e-33	0.000153636	0.00522962	0.989194	0.605153	0.0254862	0.368207	0.000234332	8.99023e-16
P-value	Lactobacillus oris	0.00473901	0.504494	0.256397	0.420904	0.83261	0.00440766	0.845255	0.00496735	0.00515989	0.445475	0.260709	1.47838e-30	0.525795	0.692514	0.428398	0.582799	0.682297	0.17021	0.013374
P-value	Lactobacillus parabuchneri	4.36034e-33	0.634786	0.890784	0.856653	0.979625	1.39463e-248	0.892748	0.919024	0.876052	0.926452	0.891762	0.892748	0.938819	0.961852	0.923669	0.947019	0.960512	0.831976	0.690872
P-value	Lactobacillus reuteri	0.0299148	0.852636	0.33768	0.657784	0.858294	0.0258461	0.346495	0.477796	0.886957	0.0127828	0.897846	0.346495	0.591988	0.00681895	0.503492	0.642623	0.729499	0.97183	0.989397
P-value	Lactobacillus rogosae	2.17338e-06	2.44319e-12	0.00895816	0.560735	0.0860255	0.640702	2.25343e-05	0.942337	0.0845209	0.00101181	0.0609462	0.11886	0.00152545	0.0176629	0.941653	7.63994e-09	0.120382	0.623114	3.64393e-11
P-value	Lactobacillus ruminis	0.0331427	4.7163e-07	0.000971533	9.58893e-157	0.52032	0.254421	1.09634e-86	0.010584	0.000680241	0.72721	3.26263e-98	4.22517e-214	3.03228e-37	0.229064	0.324846	3.21257e-05	0.21313	0.00168627	1.70725e-09
P-value	Lactobacillus salivarius	0.205557	5.89015e-106	0.00333435	0.0355062	0.508879	0.984249	0.831949	0.195823	0.0091008	0.363199	0.0032653	0.0848479	0.154542	0.216478	0.114275	0.0860076	0.0260454	0.000412642	2.73025e-22
P-value	Lactobacillus vaginalis	1.01834e-10	0.194108	0.333604	0.220849	0.857107	3.30239e-07	0.896133	0.00034203	0.00626639	0.360921	0.337979	0.227118	0.588855	0.736198	0.415553	0.63981	0.727299	1.19422e-14	0.0196884
P-value	Lactococcus lactis subsp. cremoris	3.13739e-22	2.09255e-16	0.0674428	0.00160301	0.624815	7.63931e-37	0.00990464	0.834744	0.945232	0.0682928	0.00924044	0.0293077	0.4605	0.79325	4.66099e-10	0.203735	0.343582	0.000742877	1.79419e-32
P-value	Lactococcus lactis subsp. lactis	9.60058e-06	2.84671e-34	0.834788	1.52831e-61	0.551044	1.2603e-17	3.6798e-05	0.482081	0.0243998	0.00307496	0.0154811	0.387436	2.24345e-11	0.337909	0.000369532	0.774746	0.37197	0.00270589	3.18311e-21
P-value	Leuconostoc mesenteroides	2.09176e-28	0.028725	0.273351	0.654666	0.810863	6.78727e-128	0.207007	9.90998e-06	0.144335	0.00721627	0.202836	0.0428962	0.472534	4.15708e-05	2.07348e-138	0.533968	0.643023	0.184325	0.357134
P-value	Libanicoccus massiliensis	0.545671	6.42272e-12	0.616684	3.62204e-185	0.707164	0.531864	0.349057	0.054679	0.350465	0.175047	0	2.38626e-223	2.30774e-77	0.482136	0.985269	0.328898	0.466889	0.987349	7.19446e-05
P-value	Massiliomicrobiota sp. An80 & An105 & An134 & An142	0.000351601	6.78148e-19	0.564475	1.14638e-06	0.491807	0.00147971	0.000287298	0.911285	0.000855927	0.217297	0.000252099	0.000287298	0.0390549	0.599053	0.028836	0.0739956	0.183072	6.67899e-14	4.7418e-33
P-value	Massiliomicrobiota timonensis	7.06198e-14	7.85505e-16	0.000575136	0.000147239	0.541399	7.20103e-07	0.00127615	6.36422e-05	6.72109e-17	6.09559e-22	0.00114941	0.00127615	0.066769	0.000227502	7.68156e-12	0.11247	0.236915	4.70634e-28	5.75398e-07
P-value	Mediterranea massiliensis	0.696962	0.0685809	1.09652e-53	0.4037	0.921976	8.69227e-15	0.605542	0.0264497	0.550203	0.72364	0.60221	0.605542	0.768737	0.854589	0.713606	0.799055	0.849543	2.25446e-15	0.127485
P-value	Megamonas funiformis == rupellensis	0.000196015	0	8.48111e-09	5.07363e-05	0.169602	4.09847e-05	0.0531147	2.53834e-05	0.0149638	0.0340399	9.7762e-13	7.31594e-07	3.72955e-05	0.0367719	2.62184e-07	0.000357056	0.539186	6.08978e-20	2.36005e-73
P-value	Megasphaera elsdenii	0.583368	8.75895e-05	0.953598	0.582679	0.739844	1.90087e-05	0.0138949	0.186768	0.0976828	0.230633	0.542708	1.52331e-84	0.0337609	0.534415	0.213417	0.388137	0.520162	0.23331	1.06912e-05
P-value	Megasphaera massiliensis	0.171641	2.33139e-05	0.714664	0.109549	0.820813	0.154303	4.88745e-05	0.0112457	0.00132087	0.0900719	0.228081	0.232374	0.496569	0.0468115	0.396058	0.262263	0.660908	0.868739	8.16804e-22
P-value	Megasphaera micronuciformis	0.0438281	0.00138544	0.0200117	0.00219071	0.54116	0.0168243	0.987403	0.0462385	1.31166e-30	0.455508	0.00189725	0.759206	0.64406	0.849138	0.0645813	0.112258	0.236638	0.00109762	0.0160341
P-value	Megasphaera sp. ASD88 & An286	0.525711	3.83063e-22	0.391406	0.259513	0.873189	0.318053	0.400034	0.00969631	0.938609	0.564489	0.395689	0.400034	0.631857	0.76522	0.549805	0.678273	0.757231	0.598521	0.0129147
P-value	Megasphaera sp. BL7 & NM10	0.00112555	1.16727e-31	3.84098e-05	4.07954e-54	0.41275	0.0336525	1.69706e-38	0.0241328	0.0345881	0.00310431	0.490842	1.98009e-106	0.437927	0.125407	0.0204272	0.0332741	0.112676	2.87811e-10	7.4552e-29
P-value	Merdimonas faecis	1.24246e-07	8.44084e-11	0.000974639	0.000699038	0.602218	0.00098432	0.251203	4.46881e-19	1.31442e-31	1.32614e-05	0.00553017	0.0059787	0.117679	0.883529	0.0147277	0.175541	0.312769	3.76095e-29	0.0347546
P-value	Methanobrevibacter smithii 1	0.0895189	3.67237e-23	0.00718732	2.83732e-44	0.301085	4.56693e-11	0.71053	0.679889	0.000435638	0.058994	1.9493e-41	0.0886957	2.03063e-13	0.000144802	3.468e-15	2.11899e-18	0.45834	8.18001e-43	0.993165
P-value	Methanobrevibacter smithii 2	6.88511e-05	9.64819e-11	1.94191e-52	0.769157	0.730835	2.21035e-18	0.0696724	0.0153496	0.0358336	0.0032406	0.0358848	0.000102185	2.02162e-111	1.89586e-08	1.47501e-09	0.818232	0.505252	1.72874e-117	0.145367
P-value	Methanosphaera stadtmanae	0.00675139	0.0249773	0.227862	7.04806e-144	0.636889	6.50984e-05	0.0127918	0.462801	0.0322143	0.0883534	1.83852e-62	0.0127918	1.14301e-14	0.00780346	0.0478695	9.15898e-16	0.188818	0.0574067	0.000162269
P-value	Mitsuokella jalaludinii	0.422292	8.70143e-05	0.934511	1.64011e-198	0.629808	0.00818503	2.61482e-28	0.0088003	0.704682	0.0818494	0.124523	3.6786e-293	0.42348	0.767106	0.231571	0.2256	0.845285	0.0089444	4.46333e-08
P-value	Mitsuokella multacida	0.0457964	0.990412	0.953546	1.46114e-149	0.615436	0.87507	9.5155e-36	0.146239	0.39641	0.0697602	0.000357669	1.79515e-08	0.131581	0.347292	0.176947	1.38301e-05	0.330626	0.00074442	3.88856e-09
P-value	Mobilibacterium timonense	0.598805	0.845706	0.477337	1.01455e-15	0.894723	0.604706	0.485343	0.598805	0.41956	0.632851	1.05108e-07	0.485343	0.691193	0.804446	0.123189	0.730899	0.797726	0.900126	0.162017
P-value	Mollicutes bacterium Phil14	0.900814	0.560347	3.39669e-14	0.824747	0.975012	0.902404	0.868718	0.900814	0.848358	0.909899	0.867514	0.868718	0	0.953237	5.2433e-21	0.93507	0.951596	0.794787	0.625891
P-value	Morganella morganii	0.394323	0.0339063	0.249938	0.000485515	0.830351	0.401985	0.105938	0.7285	0.280984	0.439264	0.506767	0.824123	0.520138	0.68852	0.422097	0.577646	0.678186	0.492762	0.0114511
P-value	Mycoplasma sp. CAG:472	0.393289	0.0108943	4.33049e-07	9.95637e-26	0.631043	0.000122856	2.40899e-07	0.176511	0.010372	0.172529	9.74747e-28	0.370998	3.54446e-60	0.128724	0.0907215	1.33947e-21	0.352313	0.396536	0.06675
P-value	Mycoplasma sp. CAG:611	0.646139	0.157128	1.14911e-20	5.67585e-12	0.641095	0.000606886	0.0549151	0.136014	0.0363058	0.852695	2.72267e-06	0.172029	2.98839e-26	0.0985549	0.00186884	9.70892e-42	0.0120561	4.31947e-11	7.16306e-06
P-value	Mycoplasma sp. CAG:776	7.61158e-17	0.091266	6.36301e-46	0.521067	0.927623	5.26449e-08	0.631962	0.0142389	0.579513	3.00615e-09	0.628813	0.631962	0.785092	0.865037	3.16676e-53	0.813359	0.860346	0.482743	0.705607
P-value	Mycoplasma sp. CAG:877	0.779348	0.00293435	4.36859e-05	5.11955e-18	0.824683	0.386197	3.07045e-12	0.378467	0.176597	0.0792466	1.08495e-69	0.00118594	7.9494e-129	0.678527	0.684961	0.00349906	0.0557926	0.205877	0.179764
P-value	Mycoplasma sp. CAG:956	0.830675	4.57421e-07	7.55725e-05	4.27873e-91	0.775808	9.16987e-06	5.34727e-20	0.257532	0.0823306	0.303917	1.50197e-167	0.88716	3.09065e-48	0.594148	0.285933	1.30102e-18	0.205541	0.169988	0.0302954
P-value	Negativibacillus massiliensis	0.00753393	2.15666e-33	0.000696812	3.93341e-10	0.28765	0.695361	6.3497e-07	0.0913264	1.51444e-09	0.0551314	1.46701e-08	1.98638e-08	0.00141239	0.580424	0.664354	0.00571696	0.858976	0.135713	8.10555e-10
P-value	Neglecta timonensis	0.117158	3.38052e-20	0.0148294	0.000199105	0.598827	0.314548	0.00552576	0.115113	0.662843	0.0575319	0.00510434	0.00552576	0.114285	0.324965	1.88477e-20	0.171538	0.308266	8.59942e-13	1.80714e-83
P-value	Odoribacter laneus	0.092104	2.50648e-07	0.916827	0.839004	0.783027	0.281396	0.146496	0.446994	0.0415732	0.300248	0.142796	0.146496	0.408456	0.606394	7.91546e-07	0.474186	0.593813	0.114416	3.67716e-28
P-value	Odoribacter splanchnicus	2.81666e-09	6.13353e-13	9.96485e-09	1.32242e-23	0.945949	0.17849	0.00101509	0.515445	2.9462e-05	0.601671	3.43451e-21	0.0194404	2.32376e-11	0.0225717	0.239682	2.2043e-08	0.259128	0.0275207	1.06117e-28
P-value	Olsenella sp. An188	0.662389	0.209248	0.252101	0.437882	0.912555	0.0531337	0.562566	0.0584343	0.0128781	2.17293e-06	0.558958	0.00247814	0.741658	0.837201	0.68071	0.775322	0.831568	1.23917e-16	0.0874383
P-value	Olsenella sp. KH3B4	0.726968	0.102566	0.637225	1.12022e-42	0.930022	0.00880265	3.56619e-11	0.726968	0.592179	0.751214	0.640262	0.643329	0.792068	0.869482	0.742103	0.819453	0.864942	0.466195	0.77716
P-value	Olsenella sp. Marseille-P2300	0.313934	0.391323	0.370081	0.225513	0.800046	0.0331461	0.181703	0.00181274	0.00111951	3.64465e-09	0.177695	0.0759116	0.447071	0.635572	0.000784837	0.51036	0.623752	2.14248e-10	0.00107341
P-value	Olsenella sp. Marseille-P2912	0.260718	0.394702	0.000922371	0.334272	0.777262	1.21027e-10	0.135794	0.478184	0.183761	2.686e-16	0.406525	0.554086	0.726634	0.596609	0.929217	0.462212	0.583783	1.28836e-11	0.000477191
P-value	Olsenella sp. Marseille-P3256	0.81061	0.290198	0.746196	0.670271	0.951945	0.813605	0.750634	4.4981e-05	0.00935577	0.827747	0.748405	0.750634	0.85642	0.910211	0.821318	0.875519	0.907072	0.617003	0.348496
P-value	Oribacterium sinus	0.000232335	0.899448	0.467043	0.0129502	0.686936	0.789209	0.102571	0.733566	5.59992e-51	0.145696	0.852152	0.105162	0.226368	0.450824	0.414886	0.294907	0.435086	0.181612	0.0559346
P-value	Oscillibacter sp. 57_20	4.81231e-08	0.00090113	0.846744	0.104696	0.0116517	0.00875793	0.0161691	0.00236509	3.91392e-10	0.465996	0.00140194	1.07748e-47	0.942511	0.194876	0.563019	1.83023e-05	0.00282524	3.04494e-06	3.13155e-09
P-value	Oscillibacter sp. CAG:155	0.437368	0.00476487	0.000311416	0.596531	0.724265	0.000125924	0.0628593	1.11699e-11	0.0928339	0.00560882	0.0604628	0.0628593	0.289638	0.0125603	0.0721185	0.359241	0.494484	0.00426296	0.000178289
P-value	Oscillibacter sp. CAG:241	0.468721	5.01164e-32	0.0825442	2.14755e-44	0.385721	0.000935947	2.29211e-16	0.122499	0.00551622	0.683186	1.73043e-12	1.45175e-136	1.85841e-35	0.910394	2.10218e-06	3.90972e-19	0.085113	4.34502e-15	0.00529363
P-value	Oscillibacter sp. ER4 / Firmicutes bacterium CAG:129_59_24	0.00292284	0.424733	0.163863	0.810981	0.2296	0.346766	0.876228	0.864526	1.73716e-07	0.0469428	0.0137139	3.1623e-28	0.053813	0.484956	0.0288166	0.00887679	0.125072	0.43931	0.955657
P-value	Oscillibacter sp. KLE 1728 & KLE 1745 / Oscillospiraceae VE202-24	2.03148e-09	2.97307e-13	0.00150169	7.08813e-70	0.754416	0.14977	1.04602e-33	0.000396896	0.00379134	0.851608	8.64081e-59	0.000533751	1.11974e-19	0.0482228	0.0561087	3.94141e-15	3.14324e-07	0.00624166	1.28512e-63
P-value	Oxalobacter formigenes 1	0.00750466	7.82034e-64	0.0134456	7.45608e-09	0.351158	0.00110791	6.33115e-05	0.0026173	0.000160419	0.000761634	6.82364e-07	2.83117e-05	0.00512744	0.303842	0.0337951	0.015384	0.0709688	7.6694e-07	7.76529e-09
P-value	Oxalobacter formigenes 2	0.697923	0.0695115	0.000468935	0.49044	0.922235	0.702556	0.606746	0.697923	0.551535	0.724524	0.603422	0.606746	0.769487	0.855069	4.68792e-16	0.799711	0.85004	1.45242e-08	0.482409
P-value	Parabacteroides distasonis	5.65695e-15	0.010646	0.0831035	6.07742e-56	0.317677	0.800502	1.63888e-16	0.727231	0.00686227	0.42162	1.07331e-39	2.08344e-18	2.26062e-16	0.556061	0.029326	9.38109e-16	0.0337716	0.0267132	8.73358e-09
P-value	Parabacteroides goldsteinii	2.21724e-05	4.3983e-61	0.000291458	0.0463044	0.156491	0.0668028	1.5495e-05	0.0739373	0.193774	0.0077479	4.02591e-09	1.41798e-07	6.51504e-05	0.0164213	0.69459	0.000230503	0.66906	0.95121	9.71781e-27
P-value	Parabacteroides gordonii	0.00263497	3.44903e-182	0.000464938	0.277255	0.449472	0.334761	0.827161	0.00773245	0.248672	0.00632328	0.000176977	6.60188e-05	0.0231871	0.481672	0.102968	0.0493432	0.457121	5.67411e-06	3.41224e-24
P-value	Parabacteroides johnsonii	0.0568591	8.08306e-12	0.378044	6.33811e-07	0.414267	0.622436	0.00740353	0.630074	0.958153	0.219578	1.37526e-05	1.64889e-05	0.0443943	0.00156725	0.710322	0.0338498	0.871905	0.0788046	0.0145536
P-value	Parabacteroides merdae	7.90842e-08	1.12607e-06	0.681541	3.37445e-30	0.773287	0.0753463	2.49712e-09	0.46328	0.233332	0.296103	2.95529e-31	0.00815266	2.08e-13	0.503152	0.353418	2.96056e-10	0.0661501	0.0839883	7.83602e-29
P-value	Parabacteroides sp. CAG:409	0.894261	0.000147721	0.560147	0.725609	0.7034	0.552869	0.0996878	0.203597	0.175625	0.36777	0.0427324	0.0446719	0.253088	0.476247	0.989579	0.322415	0.460901	0.15566	0.0145671
P-value	Parabacteroides sp. SN4	0.952545	2.72402e-05	0.37072	1.75798e-205	0.660648	0.170371	8.77256e-10	0.0808973	0.0577437	0.112993	9.19679e-86	1.62332e-22	1.17524e-13	0.0903762	0.812209	1.09523e-51	0.10638	0.0146483	3.9797e-05
P-value	Paraprevotella clara	0.363254	9.65801e-06	1.61594e-10	8.33441e-12	0.291525	0.0252735	0.00280431	0.0103821	0.0926445	0.0991414	5.54408e-08	0.0795358	0.0124473	0.774783	0.0045169	0.00611653	0.00929693	0.233107	0.0127794
P-value	Paraprevotella xylaniphila	0.208877	0.928053	0.177616	5.68848e-06	0.751943	0.214836	0.85146	0.700615	1.93573e-06	0.253855	0.2809	0.658133	0.342726	0.249245	0.236278	0.41138	0.540441	0.240787	0.0240555
P-value	Parasutterella excrementihominis	4.98035e-06	0.156411	0.111876	6.01222e-20	0.777065	0.799548	0.0037355	0.163398	0.000236756	0.0456767	1.93333e-14	1.92086e-08	7.56859e-08	0.885442	0.543565	3.24092e-06	0.00738808	2.49863e-06	4.4622e-17
P-value	Parvimonas micra	0.744517	0.0359884	0.0112062	0.44996	0.636788	3.12311e-27	0.237208	0.179232	2.86832e-18	0.184695	0.0348737	0.012765	0.940285	0.786956	0.989007	0.219745	0.360459	0.318836	0.0052539
P-value	Parvimonas sp. KA00067	0.427447	0.552053	0.283793	4.777e-11	0.841791	0.605825	0.940575	0.632539	0.223391	0.0344871	0.924363	0.292598	0.270764	0.708807	0.0471602	0.147016	0.699073	3.82375e-08	0.00185828
P-value	Peptoniphilus harei	0.467243	0.00303533	0.597093	0.141925	0.778852	0.000318497	0.138685	0.264228	0.451588	0.306543	0.427128	0.138685	0.399261	0.599302	0.386279	0.465499	0.586543	0.636721	0.0382583
P-value	Peptoniphilus lacrimalis	0.999914	0.949088	0.0538003	0.6489	0.719532	0.441002	0.0582882	0.153391	0.826983	0.290705	0.055998	0.0582882	0.281083	0.501683	0.862882	0.841888	0.486783	0.976752	0.379711
P-value	Peptoniphilus senegalensis	0.526497	0.710771	0.392306	0.456535	0.873428	0.533181	0.40093	0.526497	0.331184	0.565228	0.396587	0.40093	0.632504	0.765653	0.550563	0.67885	0.757678	0.0385762	0.479446
P-value	Peptostreptococcus anaerobius	0.125011	0.621349	0.250218	0.192874	0.83045	0.0050417	0.258893	0.72673	0.607693	0.00153675	0.498659	0.258893	0.520385	0.688694	0.00262798	0.57787	0.678365	0.00764065	0.102053
P-value	Peptostreptococcus sp. MV1	0.704209	0.582414	0.608122	0.499968	0.923929	0.708755	0.614629	0.704209	0.560263	0.730306	0.128435	0.123281	0.774386	0.858202	0.720493	0.000133741	0.853279	0.000105271	0.13734
P-value	Peptostreptococcus stomatis	0.749624	1.98584e-06	0.082433	0.649172	0.746393	0.246443	0.0881387	0.753948	5.45232e-05	0.777423	0.085236	0.269791	0.331663	0.545127	0.225599	0.400631	0.531103	0.28274	0.00568499
P-value	Phascolarctobacterium sp. CAG:207	3.54579e-11	8.72271e-105	1.38424e-12	4.72468e-52	0.953226	4.38988e-07	8.86865e-19	6.71627e-06	0.000118913	6.37745e-09	1.56823e-19	1.24563e-25	8.72952e-12	0.00131391	0.0004731	1.44171e-09	0.0323613	7.12031e-17	1.16426e-13
P-value	Phascolarctobacterium sp. CAG:266	0.544806	1.90143e-05	1.59449e-12	3.91317e-06	0.514143	0.210991	0.00468422	0.341521	0.635113	0.0185058	0.0611336	0.00428612	0.0501809	9.14289e-10	0.00905454	0.0899668	0.206411	0.012782	0.000350159
P-value	Phascolarctobacterium succinatutens	0.148181	4.4738e-07	0.106596	2.07426e-170	0.359423	2.7787e-08	0.00867786	0.842275	4.10151e-11	0.3308	1.8949e-17	1.00769e-98	3.09238e-32	0.338937	0.259737	2.29535e-36	5.86042e-06	0.0528763	1.37001e-07
P-value	Phocea massiliensis	5.76471e-07	0.00140737	2.25654e-05	3.92737e-44	0.992961	0.0217662	3.93363e-26	0.0571855	0.71347	0.0123075	2.40417e-27	0.0363366	1.11938e-09	0.487823	0.3756	1.34115e-07	0.556159	0.280526	1.57694e-31
P-value	Plesiomonas shigelloides	0.546732	0.398951	0.415656	2.17868e-60	0.879514	0.553211	0.424145	0.546732	0.355158	0.584227	0.644458	0.424145	0.649088	0.776702	0.570044	0.693606	0.76908	0.208438	0.0182386
P-value	Porphyromonas asaccharolytica	0.692374	0.00183608	0.0980768	0.0880919	0.75805	0.726391	0.104311	0.220685	0.0602104	0.266127	0.314048	0.726587	0.355137	0.564381	0.248406	0.423373	0.550786	0.00664917	6.73222e-08
P-value	Porphyromonas endodontalis	0.645775	0.00368703	0.534731	0.414109	0.907963	0.651099	0.28241	0.645775	0.480696	0.67642	0.538419	0.282263	0.72856	0.828746	0.664875	0.763818	0.822831	0.337415	0.304189
P-value	Porphyromonas somerae	0.224919	4.02373e-06	0.308489	0.843448	0.760186	0.232479	0.33677	0.64188	0.0625857	0.869672	0.78281	0.731471	0.835301	0.226159	0.796092	0.427609	0.554421	3.62842e-26	0.000185027
P-value	Porphyromonas sp. HMSC065F10	0.670406	0.114016	0.270448	0.147093	0.837396	0.422104	0.279214	0.414545	0.660367	0.458781	0.872644	0.279214	0.537868	0.700994	0.441911	0.593777	0.691028	0.000244826	0.0961716
P-value	Prevotella bivia	0.0181198	0.31232	0.479771	0.149245	0.488255	0.129213	0.163694	0.23334	0.04282	0.228401	0.00216201	0.0142025	0.996785	0.591116	0.090554	0.0716517	0.1795	0.77511	0.214898
P-value	Prevotella buccae	0.265758	0.000145731	0.408819	0.0479466	0.77954	0.273536	0.946554	0.840241	0.892557	0.312259	0.919277	0.942895	0.40077	0.60047	0.951503	0.466926	0.58774	0.353306	0.0976618
P-value	Prevotella copri 1	4.56722e-11	9.64798e-36	0.0213564	2.18502e-48	0.931455	0.00868601	1.23761e-22	0.000379993	2.6349e-07	0.701816	7.17756e-19	1.09147e-32	3.2509e-09	0.18076	6.31341e-08	5.65286e-09	6.92983e-06	3.92769e-13	1.1912e-45
P-value	Prevotella copri 2	0.0725121	9.1771e-06	0.000578822	2.09481e-173	0.29048	0.549902	4.29381e-34	0.0946874	0.0091821	0.000376692	4.36867e-86	8.58117e-97	1.81605e-30	0.0479523	0.0389727	4.3954e-26	1.19551e-08	1.202e-17	2.79008e-29
P-value	Prevotella corporis	0.00914104	0.889217	0.176338	0.923096	0.5121	0.0795864	0.945016	0.164996	0.00363983	0.0579809	0.000482522	0.00179735	0.411565	0.799292	0.23791	0.332096	0.659183	0.675558	0.02963
P-value	Prevotella denticola	0.799041	0.510061	0.730958	0.651025	0.94895	0.80221	0.735642	0.000150666	0.0174615	0.817185	0.733289	3.45119e-10	0.847569	0.904635	0.810377	0.867822	0.901303	0.595208	0.319236
P-value	Prevotella disiens	0.133059	0.0246995	0.686947	9.34409e-09	0.611363	0.905565	0.0619891	0.645317	0.186867	0.0296833	0.139476	0.063423	0.883518	0.826103	0.81685	0.640487	0.969415	0.0083417	0.473008
P-value	Prevotella intermedia	0.650068	0.374633	0.540053	0.000903754	0.909154	0.655338	0.54741	0.650068	0.486416	0.0416942	0.279734	0.268844	0.731951	0.830937	0.668969	0.766798	0.825095	0.343731	0.320568
P-value	Prevotella jejuni	0.418491	0.0118202	0.274509	0.150534	0.838748	0.426028	0.283288	0.418491	0.203517	0.514902	0.278857	0.910881	0.541301	0.703395	0.44577	0.596893	0.6935	0.0912494	5.88589e-14
P-value	Prevotella melaninogenica	0.0636534	4.11122e-18	0.0122328	0.00823894	0.640891	0.0680444	0.0138947	0.0636534	0.554597	0.823545	0.0130371	0.11529	0.161453	0.750234	0.0804893	0.225402	0.366327	0.000341797	0
P-value	Prevotella salivae	0.632357	0.025187	0.518179	0.395302	0.904222	0.637852	0.525779	0.632357	0.502825	0.0590785	0.521957	0.327231	0.717939	0.821867	0.652074	0.754477	0.815722	0.318051	1.61633e-28
P-value	Prevotella sp. 109 & CAG:255	0.503221	1.63042e-22	0.0487317	0.000509699	0.623021	1.26107e-06	0.0095275	2.80027e-05	0.692908	0.00193711	0.00888276	0.160931	0.140049	0.786888	0.0654764	0.2014	0.341085	0.0574412	3.24915e-06
P-value	Prevotella sp. 885	0.256903	9.3752e-14	0.00251558	0	0.534507	0.302649	3.41926e-09	0.109021	0.0907751	0.0249313	4.91918e-80	7.79593e-296	3.91394e-70	0.245174	0.0613416	4.43471e-56	0.000257661	6.71551e-06	5.36044e-07
P-value	Prevotella sp. CAG:1058	0.567163	0.00151732	0.0577695	0.309263	0.885555	0.573424	0.447916	1.51182e-06	0.765309	0.603349	0.443728	0.447916	0.665702	0.787699	0.589674	0.708349	0.780433	0.757803	0.101679
P-value	Prevotella sp. CAG:1092	0.52173	4.34771e-13	0.0444488	0	0.649454	0.0753996	0.0992026	0.226606	0.437209	0.329315	1.04366e-144	0	6.15636e-132	0.3951	0.0885429	2.86959e-121	0.378716	0.000494989	7.05298e-06
P-value	Prevotella sp. CAG:1124	0.479986	0.0241354	0.0218785	0.209451	0.858991	0.487089	0.348897	0.46113	0.405784	0.5213	0.344456	0.348897	0.59383	0.739585	0.0164784	0.644275	0.73079	0.459893	0.0757675
P-value	Prevotella sp. CAG:1185	0.67059	0.124256	0.00211997	0.44981	0.914805	0.0446803	0.572703	0.67059	0.514043	0.699343	0.569157	0.572703	0.748102	0.84135	0.0335535	0.780976	0.835857	0.0981678	0.0959426
P-value	Prevotella sp. CAG:1320	0.631855	1.62866e-09	0.517563	0.394606	0.904081	0.000115752	0.525169	0.103556	0.462298	0.663534	0.521344	0.525169	0.717541	0.821609	0.651595	0.754127	0.815456	0.946289	0.0606922
P-value	Prevotella sp. CAG:386	0.00786065	3.61468e-09	0.309496	0	0.443674	0.768134	4.70372e-12	0.268519	0.036135	0.0566791	2.79548e-124	1.43771e-180	5.6437e-53	0.551096	0.0040968	8.19301e-44	7.75508e-14	0.00917225	2.66695e-11
P-value	Prevotella sp. CAG:485	0.573585	1.36245e-06	0.30196	0.174453	0.847563	0.452088	0.310794	4.29103e-06	0.553226	0.48772	0.306338	0.310794	0.563919	6.2681e-16	0.471356	0.61736	0.709676	0.350234	0.0108035
P-value	Prevotella sp. CAG:520	0.0351596	7.11886e-05	0.0147232	4.50908e-247	0.523491	0.899299	0.00465553	0.0111891	0.55108	0.265926	3.68969e-44	5.43487e-260	8.64542e-56	0.232617	0.0168167	1.06387e-42	0.750714	9.21545e-06	8.49425e-10
P-value	Prevotella sp. CAG:604	0.00425679	2.72975e-07	0.0027823	0	0.472227	0.241179	1.47076e-16	0.0340432	0.000109123	0.651488	6.59229e-104	8.84963e-202	1.43887e-65	0.17863	0.00706244	1.43274e-46	0.00502132	2.24625e-07	2.14395e-10
P-value	Prevotella sp. CAG:617	0.421548	0.000812077	1.17229e-08	0.153229	0.839791	0.0770379	0.286456	0.0856646	0.217514	0.465517	0.414098	0.286456	0.543956	0.705248	0.448757	0.5993	0.695408	0.295423	0.0694532
P-value	Prevotella sp. CAG:732	0.138509	3.13049e-13	0.0198124	0	0.613407	0.357922	0.000399079	0.364698	0.0455495	0.0681695	4.90619e-139	0.899564	5.90545e-80	0.344529	0.0583421	1.06007e-45	0.0171042	0.000237256	1.22509e-05
P-value	Prevotella sp. CAG:755	0.0132163	0.511115	1.12004e-18	0.524583	0.928231	0.724574	0.634834	0.0128954	0.17629	0.745048	0.631706	0.634834	0.786858	0.866163	0.00755335	0.814902	0.86151	1.42865e-05	0.16108
P-value	Prevotella sp. CAG:891	0.771108	0.00117042	0.0152975	0.28521	0.768877	0.250379	0.121282	0.546128	0.228108	0.00015539	0.117875	0.26796	0.377751	0.582471	0.270887	0.445058	0.569299	0.469403	0.0169229
P-value	Prevotella sp. CAG:924	0.545238	0.0356052	1.43436e-05	0.282446	0.879069	0.0047803	0.42242	0.545238	0.353367	0.582827	0.418141	0.42242	0.647869	0.775892	0.568607	0.692522	0.768244	1.1603e-05	0.0178091
P-value	Prevotella sp. KHD1 & AG:487_50_53 & CAG:487	0.870214	1.12895e-17	0.971774	0.00631779	0.699219	6.76674e-05	0.126637	8.06111e-05	0.079123	0.163071	0.566916	0.041602	0.246126	0.478135	0.146974	0.3153	0.544939	0.243366	8.7707e-06
P-value	Prevotella sp. P4-51 & PA-67 & P5-64 & P5-108 & CAG:474	0.616477	8.20726e-13	0.19995	3.84753e-231	0.610244	0.148191	3.26211e-08	0.131638	0.648075	0.265918	2.52332e-53	0	2.01674e-101	0.34024	0.407322	2.26546e-98	8.24072e-06	0.00139026	2.04419e-05
P-value	Prevotella sp. P4-65 & P4-76 & P5-60 & P5-119 & P5-125 & CAG:592	0.696496	1.0831e-05	0.267038	1.15966e-134	0.692564	0.838138	0.0370712	0.115958	1.10329e-05	0.449428	0.00392181	1.01155e-285	6.16316e-106	0.459452	0.138474	6.21364e-76	0.0495143	0.0475876	0.000106188
P-value	Prevotella sp. UBA630	0.133385	0.0156009	0.549502	3.00888e-141	0.82846	0.736131	0.805375	0.388992	0.000485278	0.434101	0.0146131	1.13784e-19	3.39878e-25	0.685181	0.416862	4.70524e-56	0.67475	0.999243	0.000725482
P-value	Prevotella sp. UBA641	0.144971	4.87666e-12	0.376436	0	0.71392	0.15156	1.65226e-06	0.144971	0.0253084	0.185697	2.02276e-133	0	7.67038e-40	0.492776	0.169552	0.340711	0.477715	0.00233013	8.8749e-09
P-value	Prevotella stercorea	0.000156817	3.21431e-59	3.55145e-05	9.05894e-18	0.341866	0.00699686	0.046343	0.000463367	0.0017476	0.0562587	1.09399e-28	4.66955e-102	1.46334e-18	0.0753443	0.000367674	3.84118e-23	6.93776e-05	8.276e-15	3.68475e-34
P-value	Prevotella timonensis	0.123367	0.291354	0.0423274	0.201681	0.542073	0.0501023	0.448091	0.271513	0.105846	0.21766	0.0634454	0.141798	0.0241579	0.424176	0.171226	0.909112	0.149561	9.28217e-09	0.533386
P-value	Prevotella veroralis	0.937521	0.71418	0.915682	0.889228	0.984303	0.938526	0.917202	0.937521	0.904272	0.943261	0.916439	0	0.952811	0.970588	0.941111	0.959141	0.969554	0.87005	0.759127
P-value	Prevotellamassilia timonensis	0.00676179	0.000169559	0.00240416	0	0.495796	0.166208	0.00253475	0.0518831	0.0159325	0.0139306	8.22941e-18	7.38135e-212	3.84103e-19	0.202532	0.0352089	6.58238e-23	0.0215847	4.7511e-08	9.2312e-11
P-value	Proteobacteria bacterium CAG:495	0.461115	2.23509e-12	2.0636e-06	0.0205537	0.670588	0.0349517	0.183875	0.434655	0.0094498	0.248242	0.0235852	0.394751	0.201679	0.426143	0.0232516	0.268971	0.410081	0.835733	3.1213e-60
P-value	Proteus mirabilis	0.353116	2.38826e-13	0.209774	0.304338	0.815328	0.360925	0.686722	0.353116	0.97459	0.399154	0.678713	0.692678	0.48325	0.662121	0.144159	0.543849	0.651031	0.052559	0.0119
P-value	Proteus mirabilis 2	0.766662	7.49959e-07	0.0270485	0.598028	0.940509	0.770315	0.693925	0.766662	0.648921	0.787588	0.691238	0.693925	0.822719	0.888938	0.779732	0.846189	0.885065	0.53573	0.245617
P-value	Providencia rettgeri 2	0.867767	0.436585	0.822078	4.08623e-45	0.96661	0.869878	0.825245	0.867767	0.798385	0.879836	0.823655	8.10594e-07	0.899964	0.937552	0.875312	0.913333	0.935363	0.728246	0.514859
P-value	Pseudoflavonifractor capillosus	0.00425821	3.26572e-08	7.19286e-14	0.000184549	0.00377184	0.293902	0.0502316	1.75071e-07	0.00139651	0.00217652	0.000707368	0.00260742	0.0561849	0.602401	4.11381e-05	0.0982683	0.217948	1.73874e-05	6.43316e-06
P-value	Pseudoflavonifractor sp. An184	0.715151	1.37224e-11	4.55264e-27	0.0058147	0.449912	0.964177	0.00178109	4.8814e-13	0.00249747	0.602776	5.73884e-05	0.0409016	0.0233209	0.859371	4.26614e-08	0.049564	0.143387	5.74308e-12	1.2897e-05
P-value	Pyramidobacter piscolens	0.0180464	2.11133e-155	0.00139929	0.00020998	0.552037	0.364219	0.035668	0.640985	0.984606	0.0956943	0.673816	0.311073	0.0742242	0.265837	0.0258447	0.122193	0.249416	7.54036e-07	5.20976e-15
P-value	Raoultella ornithinolytica	0.0214412	2.21005e-08	0.0561902	0.0947215	0.722163	0.523381	0.060795	0.958978	1.50239e-05	0.261744	0.1822	0.340453	0.90086	0.505879	0.303393	0.355433	0.491058	0.143469	0.00119538
P-value	Rhodospirillum sp. UNK.MGS-17 / Azospirillum sp. 47_25 & CAG:260	0.000716343	4.08118e-06	1.31851e-18	6.50817e-07	0.482031	5.13517e-13	0.000208166	0.0382156	0.0704143	3.24021e-06	0.000181628	0.0257515	0.0348195	0.251997	7.63151e-08	0.0676706	0.62801	3.49851e-21	0.0382133
P-value	Rikenella microfusus	0.708025	0.079897	0.000239643	0.505784	0.924955	0.712517	0.619423	0.0191435	1.61485e-07	0.733814	0.616186	0.619423	0.777356	0.8601	0.724118	0.806595	0.855241	0.028826	0.366817
P-value	Romboutsia timonensis	8.96661e-07	1.43308e-76	4.29335e-05	2.11771e-05	0.437188	2.34622e-07	1.68596e-05	0.300715	0.206942	0.00156346	4.26198e-29	1.23699e-20	0.261037	0.127338	3.17097e-07	0.027255	0.0011505	1.36676e-10	1.20609e-94
P-value	Roseburia faecis	0.617607	3.70807e-22	0.000154883	0.129536	0.184978	0.0265693	0.0976399	0.159915	5.26033e-06	0.00138521	0.104737	7.90784e-06	0.159345	0.875134	0.00127422	0.000174798	0.520279	0.734567	7.82956e-30
P-value	Roseburia hominis	0.561612	0.200217	3.16271e-07	9.9811e-06	0.272585	0.793782	0.00207496	0.515865	0.000552835	0.552717	0.0371389	0.726542	0.000875673	0.837479	0.000166234	0.179788	0.15038	3.28565e-13	0.00993
P-value	Roseburia intestinalis	0.535389	0.111353	0.00318246	0.205849	0.922543	0.0187528	0.000895385	0.633409	0.0286112	3.40154e-05	1.01591e-28	0.620144	1.03823e-07	0.607665	0.00034866	0.0409348	0.000616382	0.73659	0.00669713
P-value	Roseburia inulinivorans	0.00118811	1.23451e-30	0.235584	0.000315351	0.942709	0.201962	0.645406	0.62212	0.730721	0.0252187	0.124825	0.138198	4.71116e-05	0.312356	0.296442	0.0185619	0.073036	3.91055e-07	1.1097e-29
P-value	Roseburia sp. CAG:100	0.818847	2.116e-09	2.54871e-13	6.48224e-53	0.0224962	0.000374553	7.49454e-06	0.0630532	1.966e-08	0.81518	1.34536e-32	0.0871363	3.30017e-06	0.625889	1.04918e-05	2.06076e-14	3.95158e-11	1.72742e-05	0.584033
P-value	Roseburia sp. CAG:182	0.0363144	4.45526e-15	2.19581e-33	1.8341e-50	0.41221	0.836866	8.11856e-05	0.0246995	6.45582e-06	0.101632	6.95779e-32	0.00186311	6.97408e-34	0.981159	9.78581e-18	6.17877e-10	0.112261	1.3229e-15	0.71118
P-value	Roseburia sp. CAG:197	3.42143e-05	7.25472e-34	5.90125e-62	0.963032	0.526548	0.00309844	0.044041	0.222198	0.000110634	0.00311854	7.81097e-30	0.445752	1.00475e-33	0.805099	1.94771e-40	2.1723e-11	0.624032	6.76689e-52	6.49506e-13
P-value	Roseburia sp. CAG:303	0.549183	2.55729e-32	0.0472009	6.83035e-08	0.399456	0.0166367	7.99036e-05	0.00317336	0.300269	0.52336	7.20827e-06	8.74134e-06	0.0114247	0.00027529	0.0787608	0.00199679	0.102711	0.0347068	4.59777e-08
P-value	Roseburia sp. CAG:309	0.743005	0.125309	1.48154e-12	0.560192	0.934279	0.747002	0.663691	1.91685e-09	0.614946	0.765922	0.0545557	0.663691	0.804478	0.877373	0.00283906	7.06271e-06	0.873103	0.493811	0.0571215
P-value	Roseburia sp. CAG:380	0.695502	0.134247	0.199589	5.06799e-26	0.453015	0.876004	0.848362	0.990992	0.374146	0.529173	0.000115671	0.0232398	0.0185159	0.552698	0.885661	2.7659e-05	0.146142	0.725622	0.000113572
P-value	Roseburia sp. CAG:45 & sp. 2789STDY5608886	0.152232	1.49664e-37	4.12972e-16	2.39287e-28	0.986002	9.14646e-07	0.681385	0.471907	3.23541e-07	0.624272	8.68375e-05	1.00048e-08	0.000279157	0.0630224	4.53754e-06	0.0443611	0.262832	6.84501e-05	1.61117e-13
P-value	Roseburia sp. CAG:471	0.354062	7.99359e-06	0.144542	1.89273e-64	0.31368	0.0776022	0.000391369	0.491515	0.00986839	0.00813282	4.54778e-71	2.02816e-07	1.26579e-21	0.187416	0.00496959	2.47914e-19	1.34422e-10	0.000281291	2.74959e-18
P-value	Ruminococcaceae bacterium D16	0.867786	0.0231136	0.760345	3.38425e-08	0.404987	0.727568	1.11206e-05	0.0887875	0.652875	0.3701	9.20997e-06	0.000721843	0.0124236	0.377867	0.0339474	0.0304389	0.106792	0.583193	2.60845e-08
P-value	Ruminococcaceae bacterium D5	0.0084844	7.18884e-09	0.689329	0.000831042	0.442387	0.656813	5.05823e-05	0.707638	0.618227	0.0431766	4.30407e-05	0.534227	0.0211115	0.387219	3.2652e-06	0.0458823	0.458787	5.62559e-21	3.63277e-07
P-value	Ruminococcus bicirculans	0.57629	0.00103076	0.00698645	4.42012e-06	0.0471134	0.187425	8.33235e-07	0.156987	5.14292e-05	0.00576556	3.11644e-07	0.00310634	0.00852067	0.070737	0.00024775	0.000417529	0.611069	0.000563289	7.86547e-06
P-value	Ruminococcus bromii 2	2.30568e-06	3.84643e-08	0.709948	9.0156e-08	0.484156	2.08987e-11	0.0695556	0.261655	2.56703e-05	4.06803e-06	0.34489	0.0246805	0.00162773	0.862965	5.03264e-10	0.64128	0.0312405	1.8408e-26	2.66216e-16
P-value	Ruminococcus callidus	0.288607	0.00492029	0.0446885	1.53496e-15	0.788136	0.281512	0.158206	0.0939203	8.26966e-08	0.519326	8.08459e-07	2.25485e-36	6.58196e-05	0.340414	0.0492505	0.00187267	0.00153385	0.337292	3.0957e-08
P-value	Ruminococcus champanellensis	0.808483	7.54009e-07	9.51527e-14	2.69059e-05	0.679064	1.77935e-05	0.787515	0.762713	0.212433	0.432354	1.30274e-27	0.0970812	5.96878e-19	0.0607619	0.0101141	1.40832e-103	0.422967	6.81603e-11	0.819414
P-value	Ruminococcus faecis	0.000158665	0.612797	0.67884	2.79073e-11	0.388241	1.32567e-05	2.68168e-20	0.209393	5.77195e-06	1.63095e-10	9.14207e-15	3.10644e-10	9.42112e-07	0.139354	1.45852e-06	0.0171743	2.21088e-06	7.04647e-09	2.05533e-08
P-value	Ruminococcus gnavus	0.0182398	4.49125e-51	2.15496e-17	2.5816e-41	0.264447	0.486509	3.39676e-14	0.0768458	6.28034e-21	0.0120943	2.07096e-27	0.0973923	9.40009e-12	0.01975	0.00508125	7.86693e-10	0.028038	2.72207e-06	1.13155e-13
P-value	Ruminococcus lactaris	0.000211099	0.283005	1.99357e-12	8.92403e-08	0.52899	0.0554038	2.90151e-06	0.137805	0.0112589	0.000150226	0.0230482	0.0507947	0.430609	0.161479	2.29434e-10	0.121881	0.352284	0.0440216	0.166063
P-value	Ruminococcus sp. 2789STDY5608794 & sp. 2789STDY5834890 / Firmicutes bacterium CAG:56	0.591646	0.0823858	2.70629e-06	0.0233698	0.381875	0.00279652	1.1737e-10	0.21546	7.3461e-14	7.20063e-11	0.512772	0.567165	0.00772935	0.0164844	5.35648e-10	0.562997	0.000113573	1.87829e-09	0.00234152
P-value	Ruminococcus sp. 2789STDY5608817 / Eubacterium sp. 2789STDY5834872	8.58272e-19	1.8957e-11	8.60526e-12	1.51831e-09	0.0284044	5.69619e-16	2.4647e-13	2.13548e-07	0.976534	1.21604e-11	8.09153e-35	0.0544533	2.40513e-05	0.00049588	4.10266e-25	3.66987e-05	0.00227094	7.22902e-61	3.79089e-07
P-value	Ruminococcus sp. 37_24 & sp. 2789STDY5834934	0.115466	1.41793e-15	0.000527413	0.000227692	0.602167	0.274078	0.00597166	0.309256	0.030469	0.0012408	0.00552355	0.00597166	0.117628	0.209045	2.61246e-12	0.175481	0.920852	5.05774e-24	6.66197e-23
P-value	Ruminococcus sp. A254.MGS-254 & CAG:254	0.632531	0.011304	0.0126062	5.07264e-18	0.256769	9.49555e-10	0.195265	0.877022	0.243727	0.00112093	2.11163e-30	1.28975e-35	1.44232e-09	0.976225	0.0657833	0.000385136	0.0275787	0.933007	1.63706e-15
P-value	Ruminococcus sp. CAG:17 & Blautia sp. 2789STDY5608880	1.04241e-17	2.23671e-19	8.9186e-35	8.16915e-19	0.276173	1.11085e-16	0.344449	3.09768e-24	1.33941e-06	2.37291e-07	0.00855638	1.1016e-18	4.54956e-11	0.00531234	8.09866e-24	0.00465043	0.0349449	1.41568e-74	0.00120544
P-value	Ruminococcus sp. CAG:177	0.147958	5.52633e-06	3.1066e-06	3.80149e-17	0.22226	0.0421391	9.80486e-06	0.41856	0.00898012	0.678722	0.241609	1.4543e-57	9.76022e-07	0.779645	0.00310283	0.425187	0.0990135	2.01684e-05	0.0573142
P-value	Ruminococcus sp. CAG:330	0.341631	1.96785e-06	0.000988052	8.13876e-26	0.0783846	0.653706	2.89919e-06	0.449587	0.503256	0.0850727	1.95229e-44	1.2853e-33	3.00635e-24	0.00739689	0.0700789	1.7382e-15	0.355599	0.367425	0.633637
P-value	Ruminococcus sp. CAG:353 & sp. 2789STDY5834938	0.915658	0.000107084	6.09996e-06	1.36666e-80	0.354757	0.0062148	0.0288756	0.268648	3.86383e-05	0.00921281	3.54586e-31	0.819972	1.70573e-18	0.601175	0.0171808	1.70057e-14	0.24606	1.08277e-08	0.000306246
P-value	Ruminococcus sp. CAG:382	0.237859	8.29509e-14	9.70778e-10	8.93242e-155	0.581687	0.000549135	3.73214e-12	0.0284872	0.0023616	0.430103	6.80158e-47	3.02901e-134	6.6156e-70	0.961417	0.503959	3.79835e-75	0.955776	1.14551e-06	9.31881e-05
P-value	Ruminococcus sp. CAG:403	0.851856	0.456992	2.39718e-05	1.92237e-10	0.636008	0.00644401	0.0398709	0.640347	0.0328966	0.087524	1.48852e-24	0.07755	2.44275e-40	0.116406	0.0166299	0.218679	0.359348	0.0117556	0.00149393
P-value	Ruminococcus sp. CAG:488	0.0434031	0.000562536	0.0345753	2.793e-165	0.611454	0.829972	4.3263e-06	0.0434031	0.0057523	0.45984	4.83014e-26	1.9688e-44	1.70833e-68	0.341878	0.430223	3.31105e-82	0.0243244	0.0394045	1.06888e-05
P-value	Ruminococcus sp. CAG:563	0.286361	0.0241037	0.147156	6.50098e-28	0.788576	0.294195	0.0229246	0.286361	0.101868	0.33302	1.40313e-115	7.00598e-20	1.72842e-86	0.615859	0.314999	1.52683e-88	0.60352	0.202461	0.00428347
P-value	Ruminococcus sp. CAG:579	0.904829	1.05115e-05	0.595912	8.25323e-37	0.7035	0.559393	0.960336	0.406434	0.0202246	0.16945	4.26907e-10	0.0447474	5.01316e-22	0.476403	0.443597	0.322586	0.461059	0.0328581	5.20048e-07
P-value	Ruminococcus sp. CAG:60 / Blautia sp. 2789STDY5608836	5.92193e-07	3.71634e-70	0.374448	8.7725e-09	0.411484	0.0529624	1.24013e-11	3.92319e-05	0.000219037	2.06588e-13	1.07163e-13	5.78136e-07	0.0430519	0.056629	0.0104312	7.28144e-10	0.000183117	1.05257e-05	1.25368e-75
P-value	Ruminococcus sp. CAG:624	0.383456	0.669473	0.018892	0.12144	0.826481	0.391165	0.532729	0.383456	0.830712	0.428732	0.243388	0.247736	0.0144664	0.681692	0.68306	5.419e-17	0.671159	4.5071e-06	0.427365
P-value	Ruminococcus sp. CAG:724	0.130151	0.00021594	0.289881	3.36536e-171	0.703444	0.557708	1.16818e-05	0.130151	0.0202001	0.169366	1.80152e-40	6.22491e-267	5.04537e-102	0.444684	0.153753	5.90721e-98	0.48875	0.0733258	3.47846e-08
P-value	Ruminococcus sp. JC304	8.82838e-09	5.40533e-09	1.58367e-22	1.82888e-14	0.873434	1.78104e-12	0.000147206	2.07027e-05	0.657705	1.11121e-18	4.16384e-67	0.398096	1.54781e-14	0.32876	1.80007e-23	1.27528e-15	4.33638e-14	3.32939e-79	2.31543e-12
P-value	Ruminococcus sp. Marseille-P328 / Blautia sp. 2789STDY5608844 & sp. 2789STDY5608844	4.46218e-18	5.98423e-05	1.63812e-08	3.4702e-12	0.00179945	4.71303e-12	1.39943e-14	1.03453e-09	0.0042087	1.1838e-16	0.111848	0.399226	0.21834	0.00488425	2.49454e-24	0.151114	0.000654826	1.20148e-59	2.43782e-29
P-value	Ruminococcus sp. UNK.MGS-30	0.442261	2.98029e-12	0.290744	0.117182	0.903452	0.00505239	0.0606419	0.140358	0.786071	0.155889	5.6316e-05	0.713784	0.383823	0.979514	0.687465	0.0090136	0.226907	0.0176737	5.20768e-08
P-value	Ruminococcus torques	0.376642	1.24444e-06	3.80342e-06	4.77326e-64	0.163297	4.90173e-05	1.38015e-27	0.471817	0.00265496	0.665777	3.51565e-46	1.46549e-08	2.40257e-16	0.530226	0.00233405	3.73265e-12	0.0006729	2.09704e-07	0.358312
P-value	Ruthenibacterium lactatiformans	4.42937e-05	1.44294e-06	0.00125714	7.99822e-64	0.740765	0.450378	1.3632e-25	0.282814	0.0394969	0.0309525	4.65227e-52	1.23704e-08	8.0755e-17	0.102221	0.417574	7.14164e-15	3.67381e-05	1.74952e-44	1.2948e-16
P-value	Sanguibacteroides justesenii == Gabonibacter massiliensis	0.218135	0.0758719	4.3438e-18	0.120823	0.650415	5.11585e-17	0.0168502	0.937915	0.2188	0.101833	0.0158613	0.0109439	0.173713	3.87644e-08	2.4262e-07	0.238875	0.12652	0.00111324	0.877894
P-value	Selenomonas artemidis	0.819813	0.123564	0.758348	0.685687	0.954321	0.822667	0.762588	0.819813	0.00512285	1.81799e-06	0.760459	0.762588	0.863451	0.914636	0.830018	0.88163	0.91165	0.634526	0.372865
P-value	Selenomonas bovis	0.472536	0.00075726	0.331922	0	0.856614	0.468843	0.22486	0.472536	0.270395	0.514227	0.336298	0.340747	4.38303e-07	0.735314	0.498391	0.638644	0.726387	0.133756	0.00486672
P-value	Sellimonas intestinalis == Drancourtella massiliensis	1.77387e-07	0.0899608	0.00910596	4.32501e-11	4.54963e-06	0.00364638	0.00078569	0.0179437	2.24145e-17	0.659222	9.01413e-08	0.000289546	0.00259319	0.597245	0.66918	0.00911019	0.0519821	0.813695	0.986835
P-value	Senegalimassilia anaerobia	0.0111086	1.38625e-14	4.81333e-08	2.7183e-134	0.298268	2.1665e-05	0.00426773	8.87978e-06	0.906299	0.138217	4.67559e-110	2.04362e-93	5.54903e-37	0.0516375	2.31926e-08	1.18997e-09	1.73425e-08	3.93832e-10	1.33808e-11
P-value	Slackia exigua	0.32334	0.625844	0.398587	0.266766	0.875085	0.5386	0.407177	0.531971	7.47826e-28	0.570374	0.402851	0.407177	0.637004	0.768658	0.555837	0.682857	0.760779	0.72714	0.192804
P-value	Slackia piriformis	0.41058	9.65217e-08	0.14436	0.000470533	0.620888	0.37536	0.00909522	0.741014	0.0488535	0.591239	0.00847307	0.0288437	0.137631	0.354769	0.48249	0.198645	0.196189	0.0024302	0.00237425
P-value	Solobacterium moorei	0.000437959	3.39469e-19	0.000261462	6.08568e-05	0.363823	2.02653e-10	2.55052e-05	0.0112055	3.62912e-18	0.616919	2.28532e-14	0.00469925	0.0709571	0.787553	0.724452	0.0768892	0.60611	0.171669	2.46098e-14
P-value	Sphaerochaeta sp. Phil3	0.623703	0.0216882	0.507568	2.24797e-19	0.901792	0.629305	0.51528	0.623703	0.45163	0.655977	4.55321e-83	0.51528	0	0.817404	0.643809	0	0.811112	0.305867	0.228235
P-value	Streptococcus anginosus	1.44637e-20	3.79728e-11	0.000538347	0.0282898	0.487527	1.01074e-18	0.000249809	0.0330606	1.18062e-16	0.328645	4.49545e-09	0.0187741	0.0964622	0.718078	0.101822	0.071178	1.20018e-05	0.0710714	1.67135e-17
P-value	Streptococcus australis	7.6006e-05	5.00036e-08	0.118173	0.000255074	0.230575	1.69942e-15	8.89123e-06	0.00155286	6.43191e-26	0.0628728	3.26097e-08	0.00192829	0.0180107	0.22172	0.00022003	0.591906	0.00175246	0.135562	1.09255e-17
P-value	Streptococcus gordonii	1.21649e-18	0.018348	0.0159318	0.000104206	0.395864	4.98197e-14	7.45708e-06	0.134526	1.81624e-22	0.0178425	1.43121e-13	0.0307542	0.895936	0.0305956	0.0632952	0.626402	4.87324e-08	0.486163	1.07321e-09
P-value	Streptococcus infantarius	0.290699	0.829905	0.00498583	0	0.601146	0.12384	1.63611e-27	0.578201	0.0014209	0.18174	3.58911e-17	0.214993	0.116599	0.328041	0.157386	0.0110983	0.000734328	4.0878e-05	7.27026e-15
P-value	Streptococcus infantis	0.000219453	0.0299016	0.00598653	0.0870855	0.530932	1.58869e-05	0.0247444	0.0572401	3.2623e-55	0.0411983	0.767434	0.913864	0.19847	0.241063	0.758244	0.103425	0.22494	0.962043	6.94402e-05
P-value	Streptococcus lutetiensis	0.221724	0.000604289	0.0988339	3.44265e-179	0.758576	5.49398e-11	0.323254	0.697995	0.00121575	0.454363	1.18896e-83	3.84391e-08	6.58354e-09	0.24048	0.52337	0.075856	0.00522935	0.688019	7.58889e-05
P-value	Streptococcus mitis	1.34311e-06	0.0378187	5.77489e-06	0.729354	0.295285	1.17956e-06	1.95208e-05	0.130765	4.57429e-33	2.96471e-06	0.924009	0.548233	0.021852	0.377187	0.117753	0.0032003	0.196694	0.000301713	0.038405
P-value	Streptococcus mutans	1.88108e-39	0.902499	0.441789	0.207781	0.582786	1.03774e-17	0.00376405	0.0195124	9.551e-18	0.00335002	0.0174474	0.0300779	0.719869	0.000839884	5.5666e-12	0.15339	0.287392	2.14153e-12	2.39903e-07
P-value	Streptococcus oralis	1.47838e-10	0.0108073	2.86487e-07	0.574921	0.557204	3.28108e-08	6.8827e-08	0.149963	2.39742e-33	0.00653855	0.00149861	0.00730681	0.572067	0.778185	0.232946	0.277344	0.00137369	0.00026099	0.000429973
P-value	Streptococcus parasanguinis	4.57952e-18	0.820865	0.095154	0.0469067	0.63026	2.4936e-10	2.86268e-07	0.0069696	3.18791e-34	2.93376e-05	7.64833e-06	8.48482e-06	0.0621026	0.0468897	5.80003e-08	0.0660626	0.0357164	1.81375e-07	3.30333e-09
P-value	Streptococcus pasteurianus	0.0955589	8.71005e-49	0.0109275	0.0766982	0.588259	0.560443	0.0788112	0.234909	0.101025	0.0506549	7.21649e-05	0.305947	0.745381	0.311117	0.125497	0.159435	0.294433	0.000146614	9.7103e-12
P-value	Streptococcus salivarius	1.41077e-13	3.64774e-96	0.465718	0.0003277	0.8	1.53866e-10	5.9985e-05	0.00860608	6.55367e-19	3.35971e-05	0.0122882	0.508442	0.639409	0.118881	2.12494e-06	0.0422149	0.0730273	0.0228319	3.30976e-141
P-value	Streptococcus salivarius 2	9.71538e-81	0.00906691	1.87253e-07	0.183731	0.850743	0.000613688	0.964625	0.542283	6.173e-08	0.496954	0.29137	0.278537	1.34912e-06	0.724786	0.000298706	0.624808	0.715536	8.17944e-16	0.0452073
P-value	Streptococcus sanguinis	2.3432e-21	7.74751e-06	9.36495e-06	0.96128	0.287287	8.55205e-20	3.15152e-07	0.000498094	2.38318e-21	0.00100643	0.000202297	0.999679	0.130644	0.155521	0.211373	0.0229715	0.00176341	0.0237895	3.27437e-08
P-value	Streptococcus sp. I-P16	0.0522137	0	9.31901e-10	2.17979e-12	0.177623	0.37156	1.54265e-08	0.103555	2.13721e-09	0.00118986	0.00125513	2.92306e-08	5.17856e-05	0.114821	0.0878507	0.00496913	0.0138641	1.44682e-12	1.41016e-73
P-value	Streptococcus sp. UBA632	0.456945	0.601533	0.315026	0.589728	0.851577	0.464228	0.323864	0.456945	0.253735	0.499391	0	0.323864	0.211079	0.726279	0.483252	0.626767	0.717074	0.12048	0.00354277
P-value	Streptococcus thermophilus	2.55385e-38	6.68675e-19	0.300838	9.37726e-10	0.024303	3.53859e-32	2.15276e-05	1.2005e-15	3.0757e-20	5.45835e-19	0.000198291	0.748477	0.015384	8.88514e-08	3.57562e-24	0.00373842	0.11794	1.93309e-62	0.302002
P-value	Streptococcus vestibularis	8.25785e-23	3.29821e-34	0.0616221	0.694162	0.297402	6.32364e-16	7.01335e-06	7.53023e-05	1.95872e-24	0.0336852	0.220234	0.397044	0.335105	0.0153388	1.07472e-10	0.0308103	0.292205	0.128155	2.69967e-34
P-value	Subdoligranulum sp. CAG:314	0.721802	4.68197e-27	4.01255e-22	2.44123e-07	0.465808	0.0282025	0.000119242	0.853518	0.00322992	0.637772	0.000103021	0.464776	0.0285723	0.0451684	3.64002e-09	0.0580276	0.157814	1.55685e-25	4.63604e-40
P-value	Succinatimonas hippei	0.234628	5.83376e-46	0.30946	0.103403	0.764984	0.557633	0.114956	0.579665	0.925578	0.280512	0.111634	0.114956	0.369531	0.575945	0.26266	0.4372	0.562618	0.105076	1.13064e-05
P-value	Succinatimonas sp. CAG:777	0.0222852	7.21516e-14	0.0064531	0	0.565427	0.545139	1.08072e-10	0.172739	0.00129069	0.559705	2.19984e-294	1.30776e-159	1.09946e-85	0.282176	0.0312475	3.13474e-60	0.000133275	0.00065334	2.46221e-12
P-value	Sutterella parvirubra	0.243784	1.60643e-46	0.115402	0.284561	0.769391	0.251464	0.378489	0.782179	0.250362	0.289901	0.662189	0.379495	0.378843	0.583333	0.271984	0.4461	0.216929	0.0458368	1.78225e-05
P-value	Sutterella sp. CAG:521	0.327175	2.23501e-20	0.786018	0.00393268	0.68331	0.756625	0.483541	0.351508	0.00673612	0.140828	0.0832204	0.031452	0.220734	0.445301	0.875757	0.289035	0.429485	0.263323	4.34995e-06
P-value	Sutterella wadsworthensis 1	0.00304637	3.77128e-24	3.49669e-05	4.54615e-15	0.916687	0.19085	0.00194909	0.0970518	2.23494e-08	1.6574e-05	0.904816	3.28418e-27	0.00685875	0.380175	0.561756	0.00288526	0.155025	1.21844e-10	0.00103309
P-value	Sutterella wadsworthensis 2	0.0510218	0.547285	1.84215e-05	5.47514e-12	0.263226	0.361869	0.000194771	0.00246432	0.154683	0.068997	0.03714	9.45137e-75	0.0205927	0.388088	0.163894	0.010937	6.97274e-08	0.982647	0.0240618
P-value	Tissierellia bacterium S7-1-4	0.64139	0.857718	0.281733	0.156719	0.841121	0.616656	0.927882	0.425468	0.221412	0.469281	0.915779	0.290532	0.547352	0.0200315	0.452585	0.602378	0.697846	0.0957469	0.637376
P-value	Treponema succinifaciens	0.395892	6.71917e-05	0.25151	5.42428e-149	0.830905	0.403547	0.83332	0.395892	0.192713	0.440782	6.01014e-232	0.260193	0	0.689498	0.423637	0	0.679193	0.237855	0.0119073
P-value	Turicibacter sanguinis 1	1.87087e-08	9.30725e-12	0.346287	9.48403e-07	0.527304	0.0758328	1.28067e-05	0.767543	0.0807576	0.0509413	2.841e-50	1.15943e-05	0.48663	0.554389	3.26293e-11	0.079428	0.624945	2.80023e-33	0.792497
P-value	Turicibacter sanguinis 2	0.00226438	0.917992	0.0983966	2.41018e-12	0.199224	0.0523843	0.0138914	0.597957	0.26905	0.649286	6.56385e-37	3.30693e-09	0.387658	0.807935	6.77425e-08	0.950545	0.173476	0.00251678	2.33011e-05
P-value	Turicimonas muris	0.0926404	0.00220031	0.167358	0.00825677	0.672327	0.816063	0.0819894	0.0926404	0.169626	0.126788	0.0714547	0.196726	0.204218	0.428741	0.113001	0.271664	0.41271	0.177295	0.753058
P-value	Tyzzerella nexilis	0.119688	1.2296e-85	2.64353e-05	5.61909e-06	0.0793948	0.636449	0.000140759	0.000260389	0.00576724	0.0511858	0.000211204	0.0342984	0.00315067	0.0657366	0.0240474	0.0105795	0.18272	0.000449839	2.20186e-21
P-value	Veillonella atypica	0.0477498	8.66207e-09	0.0839169	0.0311041	0.846948	0.0514799	0.370716	0.0320376	6.63015e-16	0.377616	0.277312	0.636555	0.00038352	0.310121	0.173179	0.000830505	0.213922	0.925287	5.00506e-10
P-value	Veillonella dispar	0.0801214	0.610509	0.0101039	0.341954	0.445336	0.0553133	0.821174	0.00773402	1.4592e-14	0.442033	0.0782114	0.612527	0.00428163	0.201258	0.0380556	0.017558	0.0561134	0.742109	0.214646
P-value	Veillonella magna	0.677319	2.24459e-16	0.574098	0.459688	0.916644	0.0389711	0.189188	0.677319	0.523201	0.705548	0.577554	0.581047	0.75338	0.844742	0.694925	0.785604	0.839364	0.385147	0.10337
P-value	Veillonella parvula	0.140348	2.01593e-43	0.621643	0.159283	0.0711513	0.136889	0.72903	0.0030516	3.73655e-08	0.820325	3.65941e-12	0.0023717	0.0683157	0.710493	0.83619	0.00535623	0.921392	0.825323	4.23182e-40
P-value	Veillonella seminalis	0.937521	0.71418	0.915682	0.889228	0.984303	0.938526	0	0.937521	0.904272	0.943261	0.916439	0.917202	0.952811	0.970588	0.941111	0.959141	0.969554	0.87005	0.759127
P-value	Veillonella sp. CAG:933	0.664451	0.0424485	0.557965	0.440869	0.913122	0.669534	0.565111	0.664451	2.10171e-15	0.693677	0.234915	0.565111	0.743279	0.838245	0.682674	0.776745	0.832648	0.365308	0.000115241
P-value	Veillonella sp. oral taxon 158	3.04319e-05	5.28267e-07	0.461708	0.00122322	0.846975	0.71429	0.138083	0.092567	1.55377e-06	0.412449	8.46529e-16	1.95383e-10	0.0154081	0.477641	0.00942646	0.162784	0.0109983	0.0177134	0.000345669
P-value	Veillonella tobetsuensis	0.00181087	2.94467e-127	0.000256438	0.0437942	0.432744	0.359971	0.203126	0.0164662	0.536413	0.692734	2.16726e-35	3.48481e-05	0.169687	0.142157	0.0104542	0.740893	0.036602	9.84346e-08	5.30627e-27
P-value	Verrucomicrobia bacterium CAG:312_58_20	0.322414	0.935445	3.15039e-05	0.0786679	0.803448	0.931462	0.189411	2.18564e-05	0.405589	0.368935	0.835916	0.300686	0.455004	0.641454	0.20879	0.517734	0.629793	0.615411	0.837924
P-value	Weissella cibaria	0.2032	1.46205e-19	0.012636	1.82618e-06	0.642421	0.915282	0.841344	0.195036	0.0869393	0.293175	5.14952e-08	0.0552135	8.37771e-21	0.699398	0.260952	0.227535	0.777644	0.00263891	1.03167e-08
P-value	Weissella confusa	0.00565878	3.41186e-09	0.000184971	4.40497e-256	0.486526	0.0190295	0.0444819	0.00565878	7.42186e-05	0.119296	3.11203e-14	0.393092	1.75259e-27	0.192943	0.00911764	0.07053	0.000529327	2.03418e-08	5.5325e-19
P-value	[Clostridium] hiranonis	0.499917	0.858102	0.362205	0.230634	0.865259	0.506849	0.370957	0.499917	0.965654	0.54017	0.366548	0.370957	0.610502	0.750878	0.524906	0.65921	0.742435	0.903859	0.227251
P-value	[Staphylococcus] sp. CAG:324	0.819052	2.89709e-24	4.42834e-25	6.55535e-05	0.5492	3.78432e-05	0.00158138	0.107102	0.000256046	0.0157243	0.00142965	0.00158138	0.0721793	3.53013e-06	8.08185e-18	0.119547	0.246049	4.14063e-58	3.11115e-23
P-value	bacterium LF-3 / Coprobacillus sp. CAG:235	0.00436862	1.54766e-69	0.00465626	4.23889e-12	0.0871335	0.000149858	2.03068e-28	0.235797	1.00298e-10	0.00230864	0.00028546	9.02207e-31	0.157566	0.00390354	1.34306e-08	0.0118809	0.280294	1.86634e-21	9.59918e-61
P-value	bacterium OL-1	0.156728	4.47293e-39	0.00427951	0.235159	0.549824	0.331996	3.57215e-06	0.333361	0.0659115	0.0308511	0.00427758	0.0323747	0.0726261	0.263184	0.206545	0.120126	0.246789	0.851713	3.19356e-13
P-value	butyrate-producing bacterium SS3/4 - Clostridium sp. CAG:81	5.27154e-15	2.74891e-124	0.404914	0.128076	0.736248	0.766069	0.141809	0.826113	0.000424022	0.0102193	6.15186e-07	1.19861e-07	6.54629e-06	0.504728	0.137385	0.116313	0.00347095	2.26835e-36	1.25763e-87

## Sheet: README
Supplemental Table S2. List of region-enriched MSPs given as Z-score >2 and P-value <0.05, we identified 743 regionally enriched MSPs among healthy samples from 17 countries.
