# Supplementary material for: Global compositional and functional states of the human gut microbiome in health and disease
Source: Genome Res. 2024 Jun;34(6):967–78. doi: 10.1101/gr.278637.123 (PMC11293553; doi:10.1101/gr.278637.123)
Supplement: Supplement 3 [file Supplemental_Table_S3.xlsx]

## Sheet: Table S3
Species	Proportion_Western	Mean_Western	Std_Western	Proportion_Nonwestern	Mean_Nonwestern	Std_Nonwestern	FC(Western_vs_Nonwestern)	M.W.W. qvalue	Significant
Acetobacter sp. 46_36 & CAG:267	0.0895129	2.51465e-07	3.55078e-06	0.0066335	1.95599e-09	4.5874e-08	128.561	2.09546e-12	TRUE
Acetobacter sp. CAG:977	0.00482668	3.85414e-09	1.26508e-07	0.0298507	3.85728e-08	9.30691e-07	0.0999186	1.43213e-07	TRUE
Acholeplasma sp. CAG:878	0.0114085	3.11537e-08	4.62576e-07	0.0945274	1.02823e-07	5.77845e-07	0.302983	1.41615e-26	TRUE
Acidaminococcus fermentans	0.0215007	1.20443e-08	1.62474e-07	0.0464345	9.61538e-08	1.41359e-06	0.12526	0.00187426	TRUE
Acidaminococcus intestini	0.122861	1.81245e-07	9.73232e-07	0.0381426	1.52317e-08	1.45506e-07	11.8992	9.86257e-10	TRUE
Acidaminococcus massiliensis	0.0460728	8.99074e-09	9.13102e-08	0.114428	3.72677e-08	3.60321e-07	0.241248	1.49122e-09	TRUE
Acidaminococcus sp. CAG:542	0.0118473	8.95265e-09	1.41551e-07	0.0613599	3.78331e-08	3.01799e-07	0.236636	9.32489e-13	TRUE
Acidaminococcus sp. CAG:917	0.0100921	6.10992e-09	1.20396e-07	0.00165837	0	0	inf	0.0211715	TRUE
Acidiphilium sp. CAG:727	0.00877578	8.83289e-09	2.6282e-07	0.321725	2.03542e-07	6.74008e-07	0.0433959	4.06603e-148	TRUE
Acinetobacter sp. N54.MGS-139 / Proteobacteria bacterium CAG:139	0.245722	3.04339e-07	1.15508e-06	0.0281924	2.45826e-08	4.05022e-07	12.3803	1.4582e-32	TRUE
Actinomyces oris	0.172444	6.73924e-09	7.53925e-08	0.238806	6.14823e-09	1.85979e-08	1.09613	0.000147946	TRUE
Adlercreutzia equolifaciens	0.656428	1.71007e-07	5.37676e-07	0.134328	2.9905e-08	1.68584e-07	5.71833	3.29925e-97	TRUE
Aeromonas caviae	0.00307152	1.39035e-10	3.01488e-09	0.0149254	1.6203e-08	2.93475e-07	0.00858081	0.00129405	TRUE
Aeromonas veronii	0.00570426	2.1211e-09	8.18886e-08	0.00995025	1.27584e-09	2.23829e-08	1.66252	0.421252	FALSE
Agathobaculum desmolans	0.00263273	1.19892e-10	3.9528e-09	0.00165837	0	0	inf	0.283951	FALSE
Aggregatibacter segnis	0.0210619	1.42293e-09	3.13376e-08	0.0646766	3.22277e-09	1.86116e-08	0.441522	7.03553e-08	TRUE
Akkermansia muciniphila	0.440983	1.64546e-06	6.62932e-06	0.310116	4.64198e-07	3.96826e-06	3.54474	2.51476e-13	TRUE
Akkermansia sp. CAG:344	0.151382	3.8926e-07	3.9999e-06	0.0580431	3.24845e-08	3.26863e-07	11.9829	7.17779e-10	TRUE
Akkermansia sp. KLE1605	0.0522159	1.25954e-07	1.72522e-06	0.00165837	0	0	inf	2.26975e-08	TRUE
Alistipes finegoldii	0.640632	9.36658e-07	3.52701e-06	0.366501	3.13946e-07	1.91276e-06	2.9835	1.22131e-39	TRUE
Alistipes ihumii	0.46029	2.16031e-07	6.90996e-07	0.165837	6.86628e-08	5.1811e-07	3.14625	2.4843e-41	TRUE
Alistipes indistinctus	0.529618	1.56215e-07	5.74427e-07	0.210614	1.00266e-07	6.23484e-07	1.55801	2.23226e-38	TRUE
Alistipes inops == Tidjanibacter massiliensis	0.249232	3.88202e-07	2.0999e-06	0.026534	2.82868e-08	3.42261e-07	13.7238	3.33599e-33	TRUE
Alistipes obesi	0.622203	5.88644e-07	1.3981e-06	0.383085	2.47748e-07	8.93966e-07	2.37598	2.46495e-35	TRUE
Alistipes onderdonkii	0.761299	2.22909e-06	6.11398e-06	0.295191	5.702e-07	4.47912e-06	3.90932	5.5312e-101	TRUE
Alistipes putredinis	0.827556	5.24195e-06	8.0735e-06	0.514096	1.38801e-06	5.30757e-06	3.7766	1.1016e-86	TRUE
Alistipes senegalensis	0.340939	8.04924e-08	2.88723e-07	0.512438	1.31948e-07	5.38322e-07	0.610031	2.20383e-10	TRUE
Alistipes shahii	0.782361	1.40396e-06	2.83674e-06	0.656716	5.57658e-07	1.87471e-06	2.5176	1.96976e-38	TRUE
Alistipes sp. An31A	0.0272049	1.21338e-07	1.59171e-06	0.00165837	0	0	inf	8.21715e-05	TRUE
Alistipes sp. An54 & An116	0.00965336	2.17826e-09	3.53554e-08	0.00165837	0	0	inf	0.0243101	TRUE
Alistipes sp. CAG:268	0.0824923	4.05667e-07	3.59102e-06	0.00331675	9.11035e-11	2.23714e-09	4452.81	2.53596e-12	TRUE
Alistipes sp. CAG:435	0.0798596	5.68009e-07	4.45881e-06	0.71476	4.43679e-06	9.86253e-06	0.128023	1.0034e-251	TRUE
Alistipes sp. CAG:514	0.0403686	2.13811e-07	2.64726e-06	0.180763	6.245e-07	3.60283e-06	0.342372	1.51752e-32	TRUE
Alistipes sp. CAG:831	0.00175516	2.55098e-08	9.13607e-07	0.00165837	0	0	inf	0.408276	FALSE
Alistipes sp. CHKCI003	0.00307152	8.40409e-09	2.65185e-07	0.00165837	0	0	inf	0.240842	FALSE
Alistipes sp. Marseille-P2431	0.064502	6.92239e-09	7.13894e-08	0.0066335	3.48898e-10	6.16157e-09	19.8407	1.15005e-08	TRUE
Alistipes sp. Zagget8	0.0583589	5.3163e-09	5.28029e-08	0.0248756	3.27147e-09	5.08112e-08	1.62505	0.00080621	TRUE
Alistipes timonensis	0.0829311	1.39195e-08	9.65825e-08	0.0165837	2.363e-09	2.67635e-08	5.89062	1.12176e-08	TRUE
Allisonella histaminiformans	0.231242	3.41282e-08	1.53582e-07	0.391376	4.38185e-08	1.19748e-07	0.778855	6.03853e-13	TRUE
Alloprevotella tannerae	0.00438789	4.59334e-10	1.3072e-08	0.00497512	2.76377e-10	6.00395e-09	1.66198	0.839611	FALSE
Anaerococcus obesiensis == vaginalis	0.0416849	1.05391e-09	1.49892e-08	0.013267	3.32614e-10	3.67606e-09	3.16856	0.000750492	TRUE
Anaerofilum sp. An201	0.0609917	1.49922e-08	2.62398e-07	0.00829187	1.86925e-10	2.49996e-09	80.2042	9.52825e-08	TRUE
Anaerofustis stercorihominis	0.0434401	7.69246e-10	5.70238e-09	0.0066335	1.10275e-10	1.9232e-09	6.97569	1.16895e-05	TRUE
Anaeroglobus geminatus	0.0131637	1.43278e-09	5.08907e-08	0.00995025	7.18855e-11	8.87346e-10	19.9314	0.40394	FALSE
Anaeromassilibacillus sp. An172	0.00175516	4.72742e-10	1.56106e-08	0.00165837	0	0	inf	0.408276	FALSE
Anaeromassilibacillus sp. An250	0.44932	4.3647e-08	1.5718e-07	0.0414594	2.75901e-09	2.10985e-08	15.8198	1.56645e-71	TRUE
Anaeromassilibacillus sp. Marseille-P3371 & Clostridia bacterium UC5.1-1E11	0.133831	1.50718e-08	1.14575e-07	0.00165837	0	0	inf	8.32418e-21	TRUE
Anaerostipes caccae	0.14129	1.34439e-08	1.13974e-07	0.00995025	3.23045e-10	3.92827e-09	41.6161	2.38154e-19	TRUE
Anaerostipes hadrus 1	0.934182	1.78825e-06	5.33599e-06	0.701493	1.10128e-07	2.40115e-07	16.238	1.45284e-124	TRUE
Anaerostipes hadrus 2	0.32251	2.17524e-07	9.7104e-07	0.124378	1.15916e-08	7.1201e-08	18.7656	1.98578e-24	TRUE
Anaerotignum lactatifermentans	0.0693287	3.0244e-08	2.52099e-07	0.00497512	4.54117e-10	8.12314e-09	66.5995	7.32311e-10	TRUE
Anaerotruncus colihominis	0.507679	2.76425e-08	9.58696e-08	0.101161	5.14794e-09	3.88203e-08	5.36963	5.65897e-65	TRUE
Anaerotruncus sp. CAG:390	0.0320316	3.87382e-08	3.51533e-07	0.134328	6.7613e-08	4.24037e-07	0.57294	7.44797e-22	TRUE
Anaerotruncus sp. CAG:528	0.039491	1.75189e-07	1.56111e-06	0.0447761	6.3575e-08	7.0917e-07	2.75562	0.695808	FALSE
Atopobium parvulum	0.0149188	5.15399e-10	7.01816e-09	0.00995025	3.72606e-10	5.66002e-09	1.38323	0.273524	FALSE
Atopobium parvulum 2	0.0649408	4.78858e-09	5.45791e-08	0.053068	4.12167e-09	3.33145e-08	1.16181	0.303931	FALSE
Azospirillum sp. 51_20	0.156209	2.15984e-07	1.39932e-06	0.00829187	2.74263e-09	4.74581e-08	78.7507	2.28692e-22	TRUE
Azospirillum sp. CAG:239	0.130759	2.64962e-07	2.08234e-06	0.0066335	5.69811e-10	9.85564e-09	465.001	8.36626e-19	TRUE
Bacillus sp. CAG:988	0.0109697	1.6099e-08	4.47461e-07	0.00165837	0	0	inf	0.0158849	TRUE
Bacteroidales bacterium 52_46	0.0122861	2.12874e-09	4.24273e-08	0.00497512	3.49965e-10	7.59893e-09	6.08272	0.0782335	FALSE
Bacteroidales bacterium 55_9	0.0447565	3.17871e-08	2.77584e-07	0.0165837	3.01608e-09	4.74621e-08	10.5392	0.00110749	TRUE
Bacteroidales bacterium H1 & K10	0.00351031	5.44748e-08	1.45727e-06	0.00165837	0	0	inf	0.203013	FALSE
Bacteroidales bacterium H10	0.0153576	1.55734e-08	3.14027e-07	0.00331675	1.04834e-11	2.57432e-10	1485.52	0.0115214	TRUE
Bacteroidales bacterium H2 / Prevotella sp. CAG:251	0.0298376	6.13337e-08	8.33727e-07	0.013267	5.16147e-10	7.69327e-09	118.83	0.0185586	TRUE
Bacteroidales bacterium H3	0.0377358	1.07111e-07	1.84623e-06	0.0298507	1.78382e-09	1.7364e-08	60.0456	0.287655	FALSE
Bacteroidales bacterium H4 & Prevotella sp. CAG:873	0.0131637	4.89619e-08	7.79599e-07	0.25539	4.51972e-07	2.14891e-06	0.108329	1.85588e-102	TRUE
Bacteroidales bacterium H5	0.00263273	6.56886e-09	1.76007e-07	0.00165837	0	0	inf	0.283951	FALSE
Bacteroidales bacterium H8 & H9 & Prevotella sp. CAG:279	0.145239	5.14674e-07	2.76826e-06	0.766169	1.71509e-06	3.7829e-06	0.300085	7.57822e-193	TRUE
Bacteroidales bacterium M1	0.00307152	9.04226e-10	2.63652e-08	0.00165837	0	0	inf	0.240842	FALSE
Bacteroidales bacterium M7	0.00131637	3.09786e-08	1.46593e-06	0.00165837	0	0	inf	0.500282	FALSE
Bacteroides acidifaciens	0.00833699	2.95079e-09	6.22741e-08	0.00497512	1.97066e-10	4.04394e-09	14.9737	0.262547	FALSE
Bacteroides barnesiae	0.00570426	7.68327e-09	1.97498e-07	0.00331675	3.0968e-11	7.60453e-10	248.103	0.273524	FALSE
Bacteroides caccae	0.724002	1.81131e-06	4.23242e-06	0.524046	4.02864e-07	1.37647e-06	4.49607	1.35176e-45	TRUE
Bacteroides cellulosilyticus	0.624397	1.10286e-06	3.08486e-06	0.212272	7.58e-08	1.09771e-06	14.5496	5.30617e-82	TRUE
Bacteroides clarus	0.232119	2.15195e-07	1.17623e-06	0.0480929	9.89803e-09	8.42608e-08	21.7412	1.60698e-24	TRUE
Bacteroides congonensis	0.0614305	2.95053e-08	3.06216e-07	0.0281924	1.11642e-08	2.58578e-07	2.64286	0.00111154	TRUE
Bacteroides coprocola	0.275121	1.83967e-06	7.1908e-06	0.0862355	1.10655e-07	9.94813e-07	16.6252	8.27914e-23	TRUE
Bacteroides coprophilus	0.105309	3.61683e-07	2.15091e-06	0.0729685	4.76183e-08	3.20302e-07	7.59548	0.0145683	TRUE
Bacteroides dorei	0.61606	3.5553e-06	8.42164e-06	0.205638	4.66375e-07	3.37249e-06	7.62326	1.79405e-74	TRUE
Bacteroides eggerthii	0.331724	1.09827e-06	4.53469e-06	0.169154	6.94789e-08	5.43641e-07	15.8072	3.7802e-17	TRUE
Bacteroides faecichinchillae	0.0754717	5.85947e-09	3.20346e-08	0.154229	1.16342e-08	3.78213e-08	0.503641	7.44481e-09	TRUE
Bacteroides faecis	0.175516	3.53209e-07	1.81655e-06	0.0149254	5.16376e-09	6.69503e-08	68.4016	9.14519e-24	TRUE
Bacteroides finegoldii	0.361123	6.41301e-07	3.00672e-06	0.190713	4.99502e-08	2.52528e-07	12.8388	6.74324e-20	TRUE
Bacteroides fluxus	0.00921457	1.44321e-08	3.11226e-07	0.013267	6.8309e-09	1.47117e-07	2.11277	0.557246	FALSE
Bacteroides fragilis 1	0.571742	1.31816e-06	5.78549e-06	0.371476	4.04928e-07	2.30835e-06	3.25529	2.11413e-24	TRUE
Bacteroides fragilis 2	0.127249	2.3478e-07	1.73464e-06	0.243781	2.85706e-07	1.59511e-06	0.821753	9.317e-12	TRUE
Bacteroides gallinarum	0.0039491	1.3366e-08	2.54033e-07	0.00165837	0	0	inf	0.171941	FALSE
Bacteroides intestinalis	0.39842	5.41606e-07	2.15651e-06	0.197347	4.39928e-08	2.80606e-07	12.3112	5.92749e-25	TRUE
Bacteroides massiliensis	0.462484	2.20081e-06	5.82425e-06	0.167496	1.16003e-07	7.22889e-07	18.9721	1.0794e-44	TRUE
Bacteroides nordii	0.426064	8.53682e-08	3.36666e-07	0.190713	2.10486e-08	1.22975e-07	4.05576	1.27993e-27	TRUE
Bacteroides oleiciplenus	0.00745941	6.46607e-10	1.10789e-08	0.0066335	2.2651e-10	3.84361e-09	2.85465	0.611149	FALSE
Bacteroides ovatus	0.920579	3.41193e-06	7.9747e-06	0.643449	6.55112e-07	3.84481e-06	5.20816	7.88996e-109	TRUE
Bacteroides pectinophilus	0.0508995	8.38938e-08	7.95303e-07	0.0779436	7.33409e-08	6.06858e-07	1.14389	0.0219127	TRUE
Bacteroides plebeius	0.377358	4.03475e-06	1.26045e-05	0.160862	5.57932e-07	4.0438e-06	7.23162	1.26239e-24	TRUE
Bacteroides salanitronis	0.00219394	7.42414e-09	2.52309e-07	0.00165837	0	0	inf	0.339195	FALSE
Bacteroides salyersiae	0.274243	2.14496e-07	8.16826e-07	0.0580431	1.0188e-08	9.74161e-08	21.0539	5.25869e-30	TRUE
Bacteroides sartorii	0.0105309	1.94231e-08	5.73102e-07	0.00331675	4.11076e-11	1.00944e-09	472.494	0.0553551	FALSE
Bacteroides sp. 43_108	0.0109697	6.76172e-09	1.49791e-07	0.00497512	8.53166e-11	1.55104e-09	79.2544	0.116087	FALSE
Bacteroides sp. An19 & An51A & An269 & An279 & CAG:702	0.00482668	4.14199e-08	1.14316e-06	0.00165837	0	0	inf	0.125286	FALSE
Bacteroides sp. An322	0.000877578	4.25621e-12	2.03187e-10	0.00165837	0	0	inf	0.634965	FALSE
Bacteroides sp. CAG:1060	0.00307152	6.58306e-09	1.99786e-07	0.0812604	1.06629e-07	7.14665e-07	0.0617379	1.26443e-34	TRUE
Bacteroides sp. CAG:1076	0.0136025	1.82968e-08	4.58402e-07	0.0315091	1.48698e-08	2.57846e-07	1.23047	0.00657115	TRUE
Bacteroides sp. CAG:144	0.110575	7.12408e-08	3.97359e-07	0.0066335	2.63145e-09	6.19266e-08	27.0728	1.34274e-15	TRUE
Bacteroides sp. CAG:443	0.0263273	1.16765e-07	1.57905e-06	0.00165837	0	0	inf	0.000108715	TRUE
Bacteroides sp. CAG:462	0.0127249	2.14146e-08	2.83516e-07	0.00497512	2.55405e-08	6.24983e-07	0.838459	0.0682624	FALSE
Bacteroides sp. CAG:530	0.0236946	2.35244e-08	3.27374e-07	0.467662	2.55534e-07	7.26791e-07	0.0920597	1.72521e-196	TRUE
Bacteroides sp. CAG:545	0.0263273	1.44952e-07	1.77408e-06	0.253731	5.79538e-07	3.16246e-06	0.250116	8.4543e-79	TRUE
Bacteroides sp. CAG:709	0.0302764	1.3655e-07	1.78855e-06	0.383085	3.64466e-07	1.19037e-06	0.374659	5.3504e-137	TRUE
Bacteroides sp. CAG:770	0.0136025	3.42363e-08	5.03961e-07	0.427861	6.56709e-07	1.8595e-06	0.0521331	2.16671e-196	TRUE
Bacteroides sp. CAG:875 & sp. 2789STDY5834845	0.0157964	6.85065e-08	1.03688e-06	0.00165837	0	0	inf	0.00327996	TRUE
Bacteroides sp. CAG:927	0.00570426	2.96743e-08	6.76078e-07	0.0215589	2.07282e-08	2.20152e-07	1.43159	0.000694371	TRUE
Bacteroides sp. Marseille-P3108 & CAG:633	0.0118473	6.40277e-08	1.55474e-06	0.00165837	0	0	inf	0.0119686	TRUE
Bacteroides sp. Marseille-P3166 & CAG:598	0.0175516	9.23695e-08	1.26928e-06	0.00165837	0	0	inf	0.00185564	TRUE
Bacteroides sp. Marseille-P3208T	0.00307152	9.64583e-09	3.2522e-07	0.00165837	0	0	inf	0.240842	FALSE
Bacteroides stercorirosoris	0.0245722	1.36851e-08	2.41296e-07	0.0066335	1.24993e-10	2.0652e-09	109.487	0.0041365	TRUE
Bacteroides stercoris	0.649408	4.85633e-06	1.11283e-05	0.396352	4.61665e-07	2.55574e-06	10.5192	1.30177e-49	TRUE
Bacteroides thetaiotaomicron	0.875823	1.893e-06	4.20327e-06	0.568823	3.8488e-07	3.29202e-06	4.91842	7.05909e-112	TRUE
Bacteroides uniformis	0.964458	9.4842e-06	1.09939e-05	0.656716	1.15866e-06	4.48272e-06	8.18545	1.62728e-188	TRUE
Bacteroides vulgatus	0.982887	1.77119e-05	1.92918e-05	0.777778	2.35278e-06	6.74767e-06	7.5281	7.59665e-182	TRUE
Bacteroides xylanisolvens	0.766125	1.38964e-06	3.56626e-06	0.46932	2.61389e-07	1.62186e-06	5.31639	8.84665e-69	TRUE
Barnesiella intestinihominis	0.580957	1.13707e-06	2.44116e-06	0.432836	1.76975e-07	6.15563e-07	6.42501	4.92707e-29	TRUE
Barnesiella sp. An22	0.0078982	1.66631e-08	2.78768e-07	0.00165837	0	0	inf	0.0438614	TRUE
Bifidobacterium adolescentis	0.52523	1.46353e-06	5.19328e-06	0.684909	3.37241e-06	9.17254e-06	0.433971	3.95018e-16	TRUE
Bifidobacterium angulatum	0.0272049	2.39044e-08	4.69705e-07	0.212272	2.44333e-07	1.52268e-06	0.0978352	2.08911e-58	TRUE
Bifidobacterium animalis	0.107942	6.56378e-08	5.10977e-07	0.013267	7.60627e-10	1.23863e-08	86.2944	2.30577e-13	TRUE
Bifidobacterium bifidum	0.230803	4.00509e-07	2.30947e-06	0.25539	3.83414e-07	4.76661e-06	1.04459	0.522171	FALSE
Bifidobacterium breve	0.053971	1.12368e-07	1.91812e-06	0.0779436	2.07335e-07	4.44804e-06	0.541962	0.0403057	TRUE
Bifidobacterium catenulatum	0.107942	2.00235e-07	2.10363e-06	0.280265	5.22927e-07	3.51744e-06	0.382913	2.73805e-25	TRUE
Bifidobacterium dentium	0.196577	3.83463e-08	5.51237e-07	0.232172	3.37205e-08	2.83352e-07	1.13718	0.0828055	FALSE
Bifidobacterium gallinarum == saeculare	0.00877578	6.68452e-09	2.03159e-07	0.00331675	3.67668e-11	9.02848e-10	181.809	0.0973081	FALSE
Bifidobacterium longum	0.748135	1.33304e-06	5.02203e-06	0.545605	1.08942e-06	5.20118e-06	1.22363	7.94621e-18	TRUE
Bifidobacterium pseudocatenulatum	0.415094	6.27739e-07	3.11369e-06	0.379768	3.909e-07	2.4343e-06	1.60588	0.00184761	TRUE
Bifidobacterium scardovii	0.00263273	3.64146e-10	1.2001e-08	0.00165837	0	0	inf	0.283951	FALSE
Bifidobacterium thermacidophilum	0.000438789	0	0	0.00995025	1.35658e-08	1.78435e-07	0	2.33042e-05	TRUE
Bilophila wadsworthia	0.827995	3.52771e-07	6.59399e-07	0.751244	2.0705e-07	5.27297e-07	1.7038	9.83194e-24	TRUE
Blastocystis sp. subtype 1	0.0206231	1.56883e-08	1.76399e-07	0.155887	4.40714e-08	1.81513e-07	0.355974	3.56913e-41	TRUE
Blastocystis sp. subtype 2	0.0179903	9.93329e-09	1.14863e-07	0.0829187	1.8236e-08	9.78862e-08	0.544707	3.89673e-15	TRUE
Blastocystis sp. subtype 3	0.0368583	2.52314e-08	3.15701e-07	0.248756	3.08644e-08	8.96498e-08	0.817494	9.95122e-62	TRUE
Blastocystis sp. subtype 4	0.0500219	8.7306e-08	6.3722e-07	0.00165837	0	0	inf	4.67358e-08	TRUE
Blastocystis sp. subtype 9	0.00570426	1.06648e-09	1.83564e-08	0.00165837	0	0	inf	0.0922911	FALSE
Blautia hansenii	0.104871	5.43701e-08	4.69513e-07	0.00497512	4.30441e-11	7.87153e-10	1263.13	2.81813e-15	TRUE
Blautia hydrogenotrophica	0.190434	1.2009e-08	6.98592e-08	0.00165837	0	0	inf	2.39256e-30	TRUE
Blautia massiliensis	0.831066	7.10922e-07	2.04866e-06	0.782753	1.60914e-07	3.12714e-07	4.41802	6.79597e-23	TRUE
Blautia obeum	0.863975	5.63614e-07	1.4375e-06	0.864013	2.16869e-07	4.40992e-07	2.59887	1.4518e-13	TRUE
Blautia producta	0.0688899	7.44055e-09	1.93925e-07	0.00331675	1.09372e-10	2.68576e-09	68.0295	2.85915e-10	TRUE
Blautia producta 2	0.148749	1.52692e-08	9.81505e-08	0.00829187	5.89333e-10	1.20151e-08	25.9092	3.83369e-21	TRUE
Blautia sp. 2789STDY5608796 & sp. 2789STDY5608848	0.252742	6.94276e-08	2.95093e-07	0.477612	6.94188e-08	2.19026e-07	1.00013	1.38457e-21	TRUE
Blautia sp. 2789STDY5834862	0.425186	3.48171e-08	9.04126e-08	0.484245	2.8859e-08	1.03277e-07	1.20646	0.161284	FALSE
Blautia sp. CAG:237	0.329092	1.20354e-07	6.25634e-07	0.363184	7.47407e-08	3.20484e-07	1.61029	0.418735	FALSE
Blautia sp. CAG:257	0.292672	1.05231e-07	1.02232e-06	0.00829187	1.12464e-09	1.89069e-08	93.5686	2.42679e-47	TRUE
Blautia sp. CAG:52 & sp. 2789STDY5834917	0.61957	2.78681e-07	7.80469e-07	0.6534	1.10944e-07	2.06892e-07	2.51191	0.0556775	FALSE
Blautia sp. Marseille-P3087 / Ruminococcus sp. 2789STDY5608882	0.716981	1.81671e-07	5.17436e-07	0.719735	1.56102e-07	4.46643e-07	1.1638	0.317494	FALSE
Blautia wexlerae	0.981132	2.62036e-06	6.91304e-06	0.91874	5.57804e-07	1.14862e-06	4.69764	6.50833e-61	TRUE
Brachyspira sp. CAG:484	0.0197455	1.67216e-08	2.94282e-07	0.00165837	0	0	inf	0.000917073	TRUE
Brachyspira sp. CAG:700	0.0219394	6.16698e-08	8.77302e-07	0.175788	3.17721e-07	1.10719e-06	0.194101	7.32571e-49	TRUE
Butyricicoccus pullicaecorum	0.0329092	3.67314e-09	3.4657e-08	0.00829187	7.92086e-10	1.08047e-08	4.63729	0.000830303	TRUE
Butyricicoccus sp. 2789STDY5834927 / Clostridia bacterium UC5.1-1D1	0.475647	2.43344e-08	7.07361e-08	0.0248756	4.37407e-09	6.12935e-08	5.56333	1.18503e-83	TRUE
Butyricicoccus sp. N15.MGS-46 & N54.MGS-46 & K4410.MGS-46	0.907416	3.89178e-07	6.4358e-07	0.885572	2.29485e-07	4.28051e-07	1.69587	4.93168e-11	TRUE
Butyricimonas synergistica 2	0.384818	1.19516e-07	3.39689e-07	0.0713101	1.25483e-08	9.90947e-08	9.52441	1.69225e-48	TRUE
Butyricimonas virosa	0.49627	1.50725e-07	4.0925e-07	0.321725	4.22327e-08	1.46444e-07	3.56892	5.12942e-19	TRUE
Butyrivibrio crossotus	0.127249	8.67883e-07	4.85431e-06	0.631841	1.49275e-06	4.71992e-06	0.5814	2.46915e-137	TRUE
Butyrivibrio sp. CAG:318	0.0684511	1.58658e-07	1.30841e-06	0.461028	3.91522e-07	1.37278e-06	0.405234	9.20651e-121	TRUE
Caecibacter massiliensis	0.0114085	6.7431e-09	1.03592e-07	0.0431177	1.7699e-08	1.9484e-07	0.380987	7.10383e-07	TRUE
Campylobacter concisus 2	0.0504607	5.19443e-09	7.9157e-08	0.0696517	2.57178e-09	1.98977e-08	2.01978	0.10678	FALSE
Campylobacter hominis	0.0609917	2.42621e-09	2.42078e-08	0.0464345	9.58587e-10	7.06203e-09	2.53103	0.16086	FALSE
Candidatus Gastranaerophilales bacterium HUM_1 / Clostridium sp. CAG:813	0.01448	7.98884e-08	2.9015e-06	0.262023	5.86995e-07	3.46511e-06	0.136097	4.26813e-103	TRUE
Candidatus Gastranaerophilales bacterium HUM_2 / Candidatus Melainabacteria bacterium MEL.A1	0.0184291	2.89408e-08	5.27576e-07	0.298507	4.5558e-07	1.91352e-06	0.0635252	1.44023e-115	TRUE
Candidatus Gastranaerophilales bacterium HUM_21 / Heliobacterium sp. N15.MGS-306 / Clostridium sp. UNK.MGS-6 & K4410.MGS-306 & CAG:306	0.0763493	3.79685e-08	3.26349e-07	0.0149254	1.75883e-09	2.96606e-08	21.5874	2.80638e-08	TRUE
Candidatus Gastranaerophilales bacterium HUM_6 & HUM_7 & HUM_12 & HUM_14	0.016674	3.30081e-08	4.81002e-07	0.21393	5.05866e-07	2.74233e-06	0.0652507	8.22798e-75	TRUE
Candidatus Gastranaerophilales bacterium MH_37 & HUM_20 / Melainabacteria sp. 35_41	0.0175516	2.4375e-08	6.87587e-07	0.00165837	0	0	inf	0.00185564	TRUE
Candidatus Gastranaerophilales bacterium x14	0.171128	1.95532e-07	1.22879e-06	0.00995025	1.01256e-09	2.18533e-08	193.107	1.55508e-24	TRUE
Candidatus Gastranaerophilus phascolarctosicola	0.000438789	0	0	0.00829187	1.86103e-09	2.98304e-08	0	0.000164365	TRUE
Candidatus Methanomassiliicoccus intestinalis	0.0171128	6.79258e-09	9.04882e-08	0.00165837	0	0	inf	0.00212815	TRUE
Candidatus Methanomethylophilus alvus / Methanoculleus sp. CAG:1088	0.00921457	1.00315e-08	1.9576e-07	0.0281924	2.6753e-08	3.97836e-07	0.374967	0.00078979	TRUE
Catabacter hongkongensis	0.0864414	3.44621e-09	1.76056e-08	0.00331675	1.66298e-10	4.08361e-09	20.7232	7.21338e-13	TRUE
Catenibacterium mitsuokai	0.0386134	7.51905e-08	8.16069e-07	0.532338	5.64007e-07	2.19734e-06	0.133315	1.31168e-204	TRUE
Catenibacterium sp. CAG:290	0.127249	3.51327e-07	2.02784e-06	0.820896	1.41055e-06	3.05686e-06	0.249071	5.47665e-242	TRUE
Christensenella minuta	0.103115	4.82442e-09	2.83439e-08	0.00829187	2.03929e-10	2.65019e-09	23.6574	6.20578e-14	TRUE
Christensenellaceae bacterium Phil1 & Clostridium sp. CAG:226	0.201404	2.60972e-07	1.58446e-06	0.510779	4.75209e-07	1.8173e-06	0.549174	1.86603e-45	TRUE
Christensenellaceae bacterium Phil10	0.00438789	2.12087e-10	6.46765e-09	0.0066335	5.7624e-08	1.40848e-06	0.00368054	0.745977	FALSE
Citrobacter freundii	0.11584	4.82648e-08	8.56979e-07	0.144279	9.28235e-08	1.73912e-06	0.519963	0.125903	FALSE
Citrobacter koseri	0.016674	5.54442e-09	9.83557e-08	0.0149254	1.53739e-09	2.99894e-08	3.60637	0.628617	FALSE
Citrobacter werkmanii	0.0078982	2.7022e-09	7.23255e-08	0.00165837	0	0	inf	0.0438614	TRUE
Cloacibacillus evryensis	0.0605529	1.13777e-08	1.38472e-07	0.013267	6.19245e-10	7.15253e-09	18.3735	2.05978e-06	TRUE
Cloacibacillus porcorum	0.118473	9.86004e-09	7.65199e-08	0.0597015	2.31026e-09	2.64332e-08	4.26794	1.92661e-05	TRUE
Clostridia bacterium UC5.1-1D10 / Clostridium sp. CAG:505 / Firmicutes bacterium CAG:466	0.102238	3.5718e-08	2.01701e-07	0.00497512	1.48475e-09	3.49684e-08	24.0565	8.924e-15	TRUE
Clostridia bacterium UC5.1-2E3	0.172005	1.3855e-08	7.57319e-08	0.0066335	2.58493e-09	5.83103e-08	5.3599	2.27629e-25	TRUE
Clostridiales bacterium 1_7_47FAA & VE202-28	0.189557	5.95279e-09	3.05602e-08	0.0447761	3.01421e-09	5.38155e-08	1.97491	1.11023e-17	TRUE
Clostridiales bacterium 41_21_two_genomes	0.0583589	1.44851e-07	1.22243e-06	0.20398	1.69761e-07	8.61039e-07	0.853267	1.83119e-27	TRUE
Clostridiales bacterium S5-A14a	0.00482668	1.31293e-10	4.12359e-09	0.00165837	0	0	inf	0.125286	FALSE
Clostridiales bacterium UBA643	0.0631856	2.77835e-08	1.98219e-07	0.412935	2.18919e-07	1.28086e-06	0.126912	2.25047e-105	TRUE
Clostridiales bacterium UBA644	0.0114085	1.30333e-09	1.90953e-08	0.0116086	2.5607e-09	4.49058e-08	0.508974	0.849398	FALSE
Clostridioides difficile	0.00438789	2.17991e-10	4.30355e-09	0.00165837	0	0	inf	0.145948	FALSE
Clostridium asparagiforme == lavalense	0.454585	3.17722e-08	1.07693e-07	0.104478	1.04108e-08	9.29022e-08	3.05186	3.13304e-51	TRUE
Clostridium bolteae	0.602018	1.74128e-07	8.50941e-07	0.169154	4.60615e-08	4.98259e-07	3.78033	3.59692e-72	TRUE
Clostridium butyricum	0.0153576	4.14021e-09	1.25741e-07	0.0165837	4.68697e-09	8.92024e-08	0.883345	0.990961	FALSE
Clostridium celatum	0.0574814	6.4547e-09	1.90115e-07	0.0878939	2.78873e-09	2.08219e-08	2.31457	0.013908	TRUE
Clostridium citroniae	0.491882	2.47794e-08	7.2023e-08	0.162521	1.34135e-08	2.01935e-07	1.84734	1.52998e-46	TRUE
Clostridium clostridioforme 1	0.201404	5.82068e-08	6.5757e-07	0.0497512	3.76108e-08	4.11181e-07	1.54761	5.23863e-18	TRUE
Clostridium clostridioforme 2	0.00658183	2.13583e-09	6.41285e-08	0.00331675	4.06382e-10	9.97914e-09	5.25571	0.203744	FALSE
Clostridium disporicum	0.0451953	5.36023e-09	8.15318e-08	0.0431177	4.3683e-09	4.79262e-08	1.22707	0.759425	FALSE
Clostridium glycyrrhizinilyticum	0.337867	3.36626e-08	1.46244e-07	0.0182421	6.58168e-09	1.47303e-07	5.11459	1.22003e-53	TRUE
Clostridium hylemonae	0.0280825	1.02671e-09	1.31869e-08	0.00165837	0	0	inf	6.18388e-05	TRUE
Clostridium innocuum	0.397982	4.86389e-08	2.76679e-07	0.13267	2.09691e-08	2.38897e-07	2.31955	2.87327e-32	TRUE
Clostridium jeddahense	0.000438789	0	0	0.00165837	0	0		1	FALSE
Clostridium leptum	0.709522	1.48899e-07	7.02561e-07	0.195688	1.23202e-08	6.87807e-08	12.0858	1.4507e-109	TRUE
Clostridium methylpentosum	0.0351031	7.76639e-10	5.62231e-09	0.00331675	1.1469e-11	2.81634e-10	67.7163	1.92661e-05	TRUE
Clostridium neonatale	0.00833699	4.4788e-09	9.79354e-08	0.0116086	3.69533e-09	6.19528e-08	1.21202	0.644993	FALSE
Clostridium paraputrificum	0.0816147	1.91776e-08	2.53268e-07	0.0580431	6.59165e-09	1.06594e-07	2.90937	0.0497585	TRUE
Clostridium perfringens	0.0917069	2.52786e-08	3.06459e-07	0.260365	8.42035e-08	6.83033e-07	0.300208	3.54366e-28	TRUE
Clostridium phoceensis	0.802545	1.90194e-07	3.19303e-07	0.278607	4.03853e-08	1.98154e-07	4.70949	3.70751e-120	TRUE
Clostridium saccharolyticum 2	0.175954	2.43039e-08	3.4828e-07	0.0116086	2.49528e-09	5.77633e-08	9.73994	1.08134e-24	TRUE
Clostridium saudiense	0.273366	5.05086e-08	2.58727e-07	0.349917	3.3693e-08	1.58091e-07	1.49908	0.00213867	TRUE
Clostridium scindens 1	0.0548486	1.01424e-08	1.25331e-07	0.00995025	4.68498e-09	6.92982e-08	2.16487	2.39763e-06	TRUE
Clostridium scindens 2	0.226415	2.15784e-08	1.1243e-07	0.0182421	6.63014e-10	6.21653e-09	32.546	2.49919e-31	TRUE
Clostridium sp. 26_22	0.146556	9.01183e-08	4.76151e-07	0.180763	2.76377e-08	1.12147e-07	3.26071	0.190072	FALSE
Clostridium sp. 2789STDY5608793	0.307152	3.60737e-08	1.29433e-07	0.560531	5.98756e-08	1.16696e-07	0.602478	3.3023e-30	TRUE
Clostridium sp. 2789STDY5608831	0.300132	2.75259e-08	1.01702e-07	0.393035	2.25174e-08	4.38365e-08	1.22243	0.00123552	TRUE
Clostridium sp. 2789STDY5608884	0.410706	5.68345e-08	3.65403e-07	0.789386	1.79692e-07	5.13535e-07	0.316289	1.2208e-81	TRUE
Clostridium sp. 2789STDY5834874 & sp. 2789STDY5608885	0.588416	5.40731e-08	8.49532e-08	0.74461	6.34698e-08	8.83593e-08	0.85195	2.23185e-07	TRUE
Clostridium sp. 2789STDY5834920	0.103554	1.88404e-08	1.15501e-07	0.00165837	0	0	inf	5.02996e-16	TRUE
Clostridium sp. 2789STDY5834924	0.592365	1.31442e-07	3.41648e-07	0.835821	1.47839e-07	2.54126e-07	0.889086	4.80877e-21	TRUE
Clostridium sp. 27_14	0.161913	6.2832e-08	3.03048e-07	0.187396	1.68109e-08	6.22937e-08	3.73757	0.51591	FALSE
Clostridium sp. 28_12 & CAG:356	0.110136	8.10576e-08	5.67505e-07	0.116086	1.59597e-08	1.01554e-07	5.07888	0.941209	FALSE
Clostridium sp. 28_17 & CAG:470	0.0960948	7.64194e-08	5.96872e-07	0.160862	1.2166e-07	8.63992e-07	0.62814	1.79956e-05	TRUE
Clostridium sp. 29_15 & CAG:265	0.18122	3.73858e-08	4.73075e-07	0.391376	1.16534e-07	8.05916e-07	0.320814	8.5508e-29	TRUE
Clostridium sp. 42_12 & CAG:75	0.505924	2.84847e-07	7.67182e-07	0.320066	8.66516e-08	4.48704e-07	3.28727	1.49801e-21	TRUE
Clostridium sp. 44_14 & CAG:277	0.0881966	6.17807e-08	4.20893e-07	0.273632	5.86438e-08	2.51098e-07	1.05349	2.67992e-30	TRUE
Clostridium sp. 7_2_43FAA	0.0122861	8.0891e-10	1.92887e-08	0.0232172	2.33202e-09	2.24036e-08	0.346871	0.0855744	FALSE
Clostridium sp. AT4	0.337429	2.43113e-07	1.74881e-06	0.0315091	2.98993e-09	3.28572e-08	81.3106	1.26179e-49	TRUE
Clostridium sp. CAG:1000	0.00833699	1.74766e-08	4.1956e-07	0.0215589	1.5768e-08	1.90921e-07	1.10836	0.0142246	TRUE
Clostridium sp. CAG:1013	0.0109697	5.05608e-10	1.15479e-08	0.00165837	0	0	inf	0.0158849	TRUE
Clostridium sp. CAG:1024	0.00965336	4.74788e-08	9.04234e-07	0.124378	8.76208e-08	7.87173e-07	0.541867	7.20109e-43	TRUE
Clostridium sp. CAG:1193	0.01448	1.02815e-08	1.48681e-07	0.0414594	5.76452e-09	5.10474e-08	1.78358	9.00194e-05	TRUE
Clostridium sp. CAG:1219	0.0039491	7.83531e-10	1.57928e-08	0.0248756	4.39559e-09	4.3247e-08	0.178254	1.45105e-06	TRUE
Clostridium sp. CAG:127	0.418166	1.08601e-06	3.25544e-06	0.762852	7.76239e-07	1.69963e-06	1.39907	2.2312e-33	TRUE
Clostridium sp. CAG:138	0.379114	5.09842e-07	1.91452e-06	0.623549	5.84623e-07	2.11217e-06	0.872086	4.91272e-18	TRUE
Clostridium sp. CAG:167	0.193945	6.4732e-08	3.20863e-07	0.0646766	5.7468e-09	4.08633e-08	11.264	7.51921e-15	TRUE
Clostridium sp. CAG:169	0.267222	9.68074e-08	3.65246e-07	0.0464345	1.0966e-08	1.06115e-07	8.82795	4.73614e-31	TRUE
Clostridium sp. CAG:217	0.385695	1.0683e-06	4.29867e-06	0.679934	5.278e-07	1.5276e-06	2.02407	8.75163e-20	TRUE
Clostridium sp. CAG:221	0.208425	2.36537e-08	1.43667e-07	0.466003	8.88273e-08	5.08691e-07	0.266289	2.07401e-39	TRUE
Clostridium sp. CAG:230	0.256253	7.93854e-08	3.50293e-07	0.303483	2.1536e-08	8.29361e-08	3.68616	0.464828	FALSE
Clostridium sp. CAG:245	0.307591	4.31749e-07	1.39691e-06	0.490879	3.04904e-07	1.40148e-06	1.41602	2.04066e-08	TRUE
Clostridium sp. CAG:253	0.149627	5.63007e-08	2.85409e-07	0.253731	3.12661e-08	2.64084e-07	1.8007	5.95402e-07	TRUE
Clostridium sp. CAG:269	0.227731	3.20182e-07	1.13894e-06	0.434494	2.50951e-07	8.72746e-07	1.27587	4.25497e-17	TRUE
Clostridium sp. CAG:273	0.163668	1.07378e-07	5.46329e-07	0.0066335	2.70506e-10	4.606e-09	396.954	3.03657e-24	TRUE
Clostridium sp. CAG:288	0.0952172	7.2429e-08	5.59912e-07	0.0961857	7.82106e-09	3.9856e-08	9.26077	0.839237	FALSE
Clostridium sp. CAG:299	0.209741	9.17513e-08	6.79934e-07	0.0215589	1.48977e-09	2.06909e-08	61.5876	8.2778e-28	TRUE
Clostridium sp. CAG:302	0.215884	3.77241e-07	1.52236e-06	0.230514	1.42511e-07	6.69794e-07	2.6471	0.902665	FALSE
Clostridium sp. CAG:307	0.0614305	1.16452e-07	1.03706e-06	0.374793	2.13405e-07	1.70154e-06	0.545684	4.52336e-88	TRUE
Clostridium sp. CAG:343	0.140412	4.00529e-07	2.43654e-06	0.155887	1.87329e-07	1.1755e-06	2.1381	0.596223	FALSE
Clostridium sp. CAG:349	0.108381	3.36566e-07	2.9782e-06	0.557214	1.49846e-06	5.54799e-06	0.224608	2.69839e-124	TRUE
Clostridium sp. CAG:352 / Ruminicoccus sp. 2789STDY5834969 & sp. 2789STDY5608859	0.148311	3.15484e-07	2.44272e-06	0.139303	5.65842e-08	3.01784e-07	5.57547	0.465844	FALSE
Clostridium sp. CAG:354_28_25	0.107503	2.12955e-07	1.30737e-06	0.00497512	2.90155e-10	5.54233e-09	733.935	1.19871e-15	TRUE
Clostridium sp. CAG:389	0.0939008	4.20321e-08	2.8015e-07	0.169154	3.50247e-08	2.02661e-07	1.20007	1.86721e-06	TRUE
Clostridium sp. CAG:411	0.0289601	1.93591e-08	2.44267e-07	0.0149254	6.17225e-09	1.13727e-07	3.13647	0.0449733	TRUE
Clostridium sp. CAG:413	0.0342255	6.10182e-08	5.56596e-07	0.190713	4.60608e-07	3.77201e-06	0.132473	3.17026e-41	TRUE
Clostridium sp. CAG:417	0.114963	2.77826e-07	2.11552e-06	0.179104	9.89245e-08	7.60164e-07	2.80846	0.000335418	TRUE
Clostridium sp. CAG:43	0.835454	5.83026e-07	9.2377e-07	0.875622	3.14009e-07	5.98727e-07	1.85672	2.92893e-11	TRUE
Clostridium sp. CAG:433	0.11233	1.37401e-07	9.02906e-07	0.543947	4.40915e-07	1.41248e-06	0.311627	7.19324e-115	TRUE
Clostridium sp. CAG:440	0.0978499	1.4566e-07	1.21378e-06	0.0431177	1.32906e-08	1.0965e-07	10.9596	1.46025e-05	TRUE
Clostridium sp. CAG:448	0.0175516	5.00913e-09	7.33143e-08	0.104478	1.13688e-08	5.82822e-08	0.440603	1.21721e-23	TRUE
Clostridium sp. CAG:451	0.0680123	5.89769e-08	5.22782e-07	0.242123	6.5118e-08	4.02782e-07	0.905693	4.22757e-32	TRUE
Clostridium sp. CAG:452	0.0684511	1.88205e-07	1.66753e-06	0.237148	2.83344e-07	1.3685e-06	0.66423	1.49409e-31	TRUE
Clostridium sp. CAG:465	0.0412462	2.21615e-07	3.94579e-06	0.145937	2.18218e-07	1.51853e-06	1.01556	7.14789e-20	TRUE
Clostridium sp. CAG:508	0.0671347	2.34973e-07	1.88915e-06	0.119403	1.05186e-07	6.15581e-07	2.23387	0.00010672	TRUE
Clostridium sp. CAG:510	0.0263273	7.49137e-08	8.79057e-07	0.461028	4.23588e-07	1.78133e-06	0.176855	5.42813e-186	TRUE
Clostridium sp. CAG:524	0.0232558	7.58737e-08	8.85441e-07	0.116086	1.11173e-07	1.15539e-06	0.682482	1.95576e-22	TRUE
Clostridium sp. CAG:533	0.0430013	2.38017e-07	2.24628e-06	0.162521	1.2916e-07	7.62963e-07	1.84281	1.81023e-23	TRUE
Clostridium sp. CAG:557	0.0289601	3.98405e-08	3.25149e-07	0.0348259	2.25352e-08	2.2956e-07	1.76792	0.613146	FALSE
Clostridium sp. CAG:567	0.0702062	3.28032e-07	3.01578e-06	0.0729685	6.47767e-08	5.84645e-07	5.06405	0.960945	FALSE
Clostridium sp. CAG:568	0.0342255	3.64406e-07	5.07097e-06	0.490879	2.61292e-06	1.03085e-05	0.139463	3.61555e-189	TRUE
Clostridium sp. CAG:571	0.0359807	7.41323e-08	7.7727e-07	0.126036	9.26285e-08	4.48252e-07	0.800319	3.7802e-17	TRUE
Clostridium sp. CAG:575	0.0346643	1.17139e-08	2.06628e-07	0.101161	1.24175e-08	7.35415e-08	0.943339	6.43497e-11	TRUE
Clostridium sp. CAG:58	0.49627	1.17852e-07	3.34358e-07	0.0895522	2.9331e-08	2.80539e-07	4.01801	1.1186e-71	TRUE
Clostridium sp. CAG:590	0.0136025	1.75307e-08	3.16838e-07	0.28524	7.439e-08	2.4627e-07	0.235659	9.89032e-117	TRUE
Clostridium sp. CAG:594	0.0342255	5.77721e-08	8.31865e-07	0.199005	9.27949e-08	3.73244e-07	0.622578	4.62493e-44	TRUE
Clostridium sp. CAG:609	0.0210619	5.55142e-08	1.61791e-06	0.121061	6.23934e-08	6.53352e-07	0.889745	1.97554e-26	TRUE
Clostridium sp. CAG:62	0.574375	5.13305e-07	1.00789e-06	0.502488	1.05494e-07	4.6598e-07	4.86573	7.89504e-20	TRUE
Clostridium sp. CAG:628	0.0381746	1.00693e-07	1.15393e-06	0.126036	1.72901e-07	1.35945e-06	0.582373	9.33557e-16	TRUE
Clostridium sp. CAG:632	0.00921457	1.8892e-08	3.61407e-07	0.353234	2.30163e-07	1.12694e-06	0.0820808	1.10928e-163	TRUE
Clostridium sp. CAG:678	0.00965336	2.66127e-08	4.55672e-07	0.00165837	0	0	inf	0.0243101	TRUE
Clostridium sp. CAG:7	0.792453	7.16755e-07	2.24595e-06	0.651741	1.28865e-07	3.99762e-07	5.56204	2.09953e-36	TRUE
Clostridium sp. CAG:710	0.0162352	3.15165e-08	4.26876e-07	0.165837	2.38394e-07	1.47932e-06	0.132204	1.01572e-51	TRUE
Clostridium sp. CAG:762	0.0184291	3.42502e-08	4.61413e-07	0.053068	5.24041e-08	4.58789e-07	0.653579	5.90227e-06	TRUE
Clostridium sp. CAG:768	0.0157964	1.22378e-08	2.20715e-07	0.0066335	1.56075e-08	3.795e-07	0.784092	0.0602372	FALSE
Clostridium sp. CAG:780	0.0447565	9.34384e-08	8.54081e-07	0.0845771	9.89589e-08	8.02793e-07	0.944215	0.000350817	TRUE
Clostridium sp. CAG:793	0.0280825	4.00023e-08	5.02955e-07	0.092869	3.07711e-08	3.04892e-07	1.3	1.38183e-11	TRUE
Clostridium sp. CAG:798	0.025011	1.15587e-07	1.50853e-06	0.00165837	0	0	inf	0.000166419	TRUE
Clostridium sp. CAG:91 & sp. 2789STDY5834873	0.905222	1.52178e-06	3.00925e-06	0.86733	1.00775e-06	2.56282e-06	1.51008	4.13109e-14	TRUE
Clostridium sp. CAG:914	0.0232558	9.71632e-08	1.30768e-06	0.0563847	1.4253e-07	1.28251e-06	0.681702	5.80817e-05	TRUE
Clostridium sp. CAG:921	0.0114085	3.11309e-09	4.87101e-08	0.0414594	2.42586e-09	1.55586e-08	1.28329	2.52206e-06	TRUE
Clostridium sp. CAG:964	0.016674	3.28315e-08	6.12423e-07	0.0729685	3.2644e-08	3.02148e-07	1.00574	8.39402e-13	TRUE
Clostridium sp. CAG:967	0.01448	1.80147e-08	4.2577e-07	0.00165837	0	0	inf	0.00502543	TRUE
Clostridium sp. CL-2	0.0254498	3.17045e-09	4.57234e-08	0.0497512	2.17347e-09	1.78681e-08	1.4587	0.00507074	TRUE
Clostridium sp. KLE 1755 & Clostridiales bacterium VE202-27	0.303642	4.44938e-08	4.17341e-07	0.0248756	9.07728e-09	1.73913e-07	4.90167	1.20615e-43	TRUE
Clostridium sp. L2-50	0.0903905	2.07445e-07	1.24304e-06	0.351575	1.90701e-07	8.31544e-07	1.0878	3.48229e-52	TRUE
Clostridium sp. Marseille-P2538	0.00438789	1.45974e-10	2.53668e-09	0.00165837	0	0	inf	0.145948	FALSE
Clostridium spiroforme	0.421676	5.13374e-08	2.06969e-07	0.0248756	1.26974e-09	1.15027e-08	40.4314	5.94179e-71	TRUE
Clostridium symbiosum	0.388328	5.48502e-08	3.00341e-07	0.0895522	1.81333e-08	2.02913e-07	3.02483	8.07089e-41	TRUE
Colibacter massiliensis	0.00131637	5.2596e-11	2.37681e-09	0.00165837	0	0	inf	0.500282	FALSE
Collinsella aerofaciens	0.741553	9.85279e-07	2.17958e-06	0.935323	2.54716e-06	4.12175e-06	0.386814	1.07927e-47	TRUE
Collinsella bouchesdurhonensis	0.0987275	2.36674e-08	1.32906e-07	0.437811	9.4008e-08	3.06887e-07	0.251759	5.99185e-81	TRUE
Collinsella intestinalis	0.0855638	5.79555e-08	1.03174e-06	0.013267	1.41082e-09	2.68357e-08	41.0794	5.13831e-10	TRUE
Collinsella stercoris	0.0193067	1.05579e-08	1.73097e-07	0.0066335	1.09141e-08	2.57281e-07	0.967366	0.0213929	TRUE
Collinsella tanakaei	0.0759105	3.4108e-08	3.2627e-07	0.00829187	7.41279e-11	9.51207e-10	460.124	5.54989e-10	TRUE
Comamonas kerstersii	0.0469504	4.06874e-09	5.9179e-08	0.301824	2.54263e-07	2.2858e-06	0.0160021	1.03387e-77	TRUE
Coprobacillus cateniformis	0.242211	4.76304e-08	4.00702e-07	0.0746269	1.03009e-08	7.56266e-08	4.62391	1.03636e-18	TRUE
Coprobacillus sp. 8_1_38FAA / Clostridium sp. 2789STDY5608874	0.299254	1.17951e-07	7.69113e-07	0.187396	5.86096e-08	3.64004e-07	2.01248	3.55433e-08	TRUE
Coprobacillus sp. CAG:605	0.0215007	2.89793e-08	3.06813e-07	0.147595	6.96798e-08	5.02933e-07	0.415892	3.01367e-36	TRUE
Coprobacillus sp. CAG:698	0.00965336	4.87481e-09	1.5042e-07	0.0547264	2.93096e-08	2.50774e-07	0.166321	2.09546e-12	TRUE
Coprobacillus sp. CAG:826	0.00833699	1.09306e-08	2.72079e-07	0.0563847	2.65317e-08	2.21488e-07	0.411982	2.30939e-14	TRUE
Coprobacter fastidiosus	0.362878	1.70866e-07	7.56935e-07	0.0480929	7.76822e-09	1.23729e-07	21.9955	4.44318e-51	TRUE
Coprobacter secundus == Gabonia massiliensis	0.267222	3.51671e-08	1.24914e-07	0.0779436	5.95059e-09	3.89717e-08	5.90984	2.57076e-23	TRUE
Coprococcus catus	0.657306	1.67399e-07	3.24705e-07	0.829187	1.14593e-07	1.45256e-07	1.46082	0.0145041	TRUE
Coprococcus comes	0.799035	7.27547e-07	1.19923e-06	0.900498	4.14465e-07	5.29203e-07	1.75539	0.0237412	TRUE
Coprococcus eutactus 1	0.0798596	1.4248e-07	1.02043e-06	0.331675	1.50005e-07	6.04072e-07	0.949834	1.66037e-54	TRUE
Coprococcus eutactus 2	0.353664	8.87788e-07	2.82691e-06	0.68325	5.51311e-07	1.60872e-06	1.61032	3.18308e-29	TRUE
Coprococcus sp. 2789STDY5608819 / Clostridium sp. CAG:264	0.197455	3.88911e-07	1.71243e-06	0.368159	2.98476e-07	1.15275e-06	1.30299	2.57164e-15	TRUE
Coprococcus sp. CAG:782	0.0337867	7.99532e-08	8.89401e-07	0.361526	2.79893e-07	1.05751e-06	0.285657	1.06992e-120	TRUE
Coprococcus sp. HPP0074 & HPP0048 / Lachnospiraceae bacterium 9_1_43BFAA & 6_1_37FAA	0.146556	9.04577e-08	5.99843e-07	0.013267	1.48676e-09	2.68757e-08	60.8421	1.8276e-19	TRUE
Coraliomargarita sp. CAG:312	0.0421237	9.98942e-09	1.04172e-07	0.0447761	4.92202e-08	9.81049e-07	0.202954	0.904725	FALSE
Corallococcus sp. CAG:1435	0.00658183	6.27375e-09	1.71872e-07	0.00165837	0	0	inf	0.0682624	FALSE
Cryptobacterium sp. CAG:338	0.124616	3.94425e-08	2.50568e-07	0.0431177	7.18295e-09	6.3729e-08	5.49114	7.53295e-09	TRUE
Culturomica massiliensis	0.031154	1.73311e-08	2.3162e-07	0.013267	6.25927e-09	1.28734e-07	2.76887	0.0133641	TRUE
Dakarella massiliensis	0.0324704	1.78878e-08	2.05808e-07	0.0215589	1.95554e-08	3.31201e-07	0.914725	0.132563	FALSE
Desulfovibrio desulfuricans	0.00833699	1.01432e-09	1.64289e-08	0.00165837	0	0	inf	0.038066	TRUE
Desulfovibrio fairfieldensis	0.0675735	1.78834e-08	1.57094e-07	0.0812604	7.84826e-09	7.60236e-08	2.27865	0.390321	FALSE
Desulfovibrio piger	0.212374	1.69965e-07	5.46085e-07	0.510779	2.72828e-07	7.65878e-07	0.622977	5.8036e-37	TRUE
Desulfovibrio sp. 92-2	0.0377358	6.05659e-09	5.44232e-08	0.00829187	4.5432e-10	7.81753e-09	13.3311	0.000171403	TRUE
Desulfovibrio sp. An276	0.00351031	1.27829e-09	3.28661e-08	0.00165837	0	0	inf	0.203013	FALSE
Desulfovibrio sp. Zagget14	0.01448	3.31091e-09	4.69853e-08	0.0281924	9.35761e-09	1.40309e-07	0.35382	0.0451288	TRUE
Dialister invisus	0.360685	1.34275e-06	4.93309e-06	0.079602	2.55394e-07	1.69126e-06	5.25755	3.42904e-39	TRUE
Dialister pneumosintes	0.025011	2.19543e-09	3.28822e-08	0.0248756	4.30607e-10	3.14108e-09	5.09845	0.849524	FALSE
Dialister sp. CAG:357	0.202282	6.97415e-07	3.19059e-06	0.106136	4.91487e-07	3.44467e-06	1.41899	4.30726e-08	TRUE
Dialister sp. CAG:486	0.0403686	1.70243e-07	1.28055e-06	0.754561	3.705e-06	4.86744e-06	0.0459495	0	TRUE
Dialister succinatiphilus	0.0324704	1.33353e-07	1.59738e-06	0.079602	7.67371e-07	4.79764e-06	0.173779	6.06495e-07	TRUE
Dielma fastidiosa	0.222905	1.51528e-08	9.03727e-08	0.0414594	3.36301e-09	3.04107e-08	4.50574	2.07717e-23	TRUE
Dorea formicigenerans	0.873629	3.74183e-07	5.384e-07	0.895522	3.7219e-07	4.20959e-07	1.00536	0.0138272	TRUE
Dorea longicatena 1	0.620448	6.4932e-07	1.46905e-06	0.852405	5.26014e-07	8.50952e-07	1.23442	1.70821e-15	TRUE
Dorea longicatena 2	0.691093	3.83225e-07	8.98818e-07	0.809287	4.07011e-07	6.92633e-07	0.941562	1.96958e-05	TRUE
Dorea sp. CAG:105	0.419043	5.68621e-08	2.17196e-07	0.519071	3.10141e-08	7.6891e-08	1.83343	0.0743817	FALSE
Dorea sp. CAG:317	0.189118	7.40235e-08	4.66238e-07	0.00497512	1.06707e-10	1.89781e-09	693.71	4.53803e-29	TRUE
Drancourtella sp. An12 & An57	0.0184291	3.69242e-09	4.8575e-08	0.00165837	0	0	inf	0.00139446	TRUE
Duodenibacillus massiliensis	0.0447565	5.67538e-08	5.63058e-07	0.495854	7.01907e-07	1.84935e-06	0.0808566	1.99803e-176	TRUE
Eggerthella lenta	0.681878	1.32634e-07	6.55943e-07	0.157546	2.43852e-08	1.66459e-07	5.43913	1.53064e-99	TRUE
Eggerthella sp. 51_9 & CAG:209	0.189996	1.34135e-07	6.1562e-07	0.497512	7.9107e-08	3.92275e-07	1.69562	1.78028e-36	TRUE
Eggerthella sp. CAG:1427	0.0136025	3.55008e-09	5.71065e-08	0.0116086	2.54153e-10	3.80383e-09	13.9683	0.546548	FALSE
Eggerthella sp. CAG:298	0.340939	8.15679e-08	4.37043e-07	0.135987	1.74457e-08	8.30124e-08	4.67553	6.04243e-22	TRUE
Eggerthella sp. CAG:368	0.0684511	1.36655e-08	1.02461e-07	0.260365	2.67353e-08	1.93681e-07	0.511141	1.26152e-37	TRUE
Eisenbergiella tayi	0.412462	5.14266e-08	3.11151e-07	0.0845771	7.48206e-09	5.93766e-08	6.87331	1.5552e-48	TRUE
Emergencia timonensis	0.102238	8.08607e-09	5.65505e-08	0.00331675	1.52319e-11	3.74036e-10	530.863	2.47651e-15	TRUE
Enorma massiliensis	0.0895129	1.71251e-08	1.23026e-07	0.00829187	3.50485e-10	4.83538e-09	48.8612	6.98604e-12	TRUE
Enterobacter asburiae	0.0324704	1.12102e-08	3.51656e-07	0.174129	1.009e-07	1.42852e-06	0.111103	7.62073e-37	TRUE
Enterobacter cloacae	0.0346643	2.40083e-09	4.42739e-08	0.195688	3.84228e-08	2.56112e-07	0.0624846	4.72969e-44	TRUE
Enterobacter cloacae complex 'Hoffmann cluster IV'	0.103115	2.28173e-08	3.20478e-07	0.442786	2.51981e-07	1.59293e-06	0.0905518	1.53785e-88	TRUE
Enterobacter kobei	0.0671347	6.85079e-09	5.94699e-08	0.185738	1.69104e-08	9.35468e-08	0.405122	2.47272e-18	TRUE
Enterobacter ludwigii	0.0460728	5.87851e-09	1.03608e-07	0.0563847	2.26207e-09	2.59133e-08	2.59872	0.418735	FALSE
Enterobacter mori	0.016674	2.3009e-09	5.44839e-08	0.039801	5.53188e-09	4.48722e-08	0.415935	0.00115014	TRUE
Enterobacter xiangfangensis	0.105309	3.81082e-08	4.58006e-07	0.328358	6.85627e-08	3.70962e-07	0.555815	1.35158e-40	TRUE
Enterococcus asini	0.00219394	2.00611e-10	5.88472e-09	0.00165837	0	0	inf	0.339195	FALSE
Enterococcus avium	0.0122861	2.20717e-09	3.36419e-08	0.00829187	1.68345e-09	3.20226e-08	1.3111	0.307208	FALSE
Enterococcus faecalis	0.0886354	2.07645e-08	3.13985e-07	0.0713101	6.46702e-09	5.50893e-08	3.21083	0.157382	FALSE
Enterococcus faecium	0.0767881	2.7811e-08	2.57715e-07	0.0597015	7.52093e-09	7.04283e-08	3.69782	0.132563	FALSE
Enterococcus gallinarum	0.00833699	7.89304e-10	1.36521e-08	0.0116086	1.31935e-09	2.45552e-08	0.598252	0.644993	FALSE
Erysipelatoclostridium ramosum	0.395788	1.28863e-07	6.55319e-07	0.102819	1.22345e-07	2.60556e-06	1.05328	7.70836e-41	TRUE
Erysipelotrichaceae bacterium 3_1_53	0.10136	6.22749e-09	7.26966e-08	0.0116086	1.56831e-09	3.22818e-08	3.97082	1.23559e-12	TRUE
Erysipelotrichaceae bacterium 5_2_54FAA / Eubacterium sp. 3_1_31	0.213251	8.00766e-08	1.72829e-06	0.00995025	5.77559e-10	1.08236e-08	138.647	8.95099e-32	TRUE
Escherichia coli	0.827117	2.5232e-06	1.0018e-05	0.971808	5.33448e-06	1.58895e-05	0.472999	8.75056e-38	TRUE
Escherichia fergusonii	0.0100921	6.51675e-10	1.15533e-08	0.0746269	1.21953e-08	1.22135e-07	0.0534367	6.74324e-20	TRUE
Eubacteriaceae bacterium CHKCI004 & Eubacterium sp. An3	0.00877578	2.83644e-09	4.2833e-08	0.00165837	0	0	inf	0.0328336	TRUE
Eubacterium dolichum	0.127688	1.4321e-08	9.85123e-08	0.0149254	2.33331e-10	2.39673e-09	61.3763	5.6887e-16	TRUE
Eubacterium eligens	0.838526	2.62557e-06	5.21649e-06	0.908789	1.52461e-06	2.33056e-06	1.72213	0.0987391	FALSE
Eubacterium hallii	0.788943	7.12296e-07	1.61437e-06	0.701493	1.38404e-07	2.66073e-07	5.14652	2.60099e-31	TRUE
Eubacterium ramulus	0.613427	1.72292e-07	4.90384e-07	0.71476	8.40978e-08	1.57638e-07	2.04871	0.915846	FALSE
Eubacterium rectale	0.892935	5.23188e-06	8.13425e-06	0.956882	7.37242e-06	9.82355e-06	0.709656	2.85915e-10	TRUE
Eubacterium siraeum	0.516016	1.03341e-06	3.47369e-06	0.55058	2.98829e-07	1.11838e-06	3.45821	0.240958	FALSE
Eubacterium sp. 2789STDY5834909	0.064502	2.87596e-08	5.58057e-07	0.14262	3.52108e-08	1.82671e-07	0.816784	1.00814e-09	TRUE
Eubacterium sp. 36_13 & CAG:86	0.519526	5.07753e-07	1.62346e-06	0.444444	1.42202e-07	5.03357e-07	3.57064	1.76898e-08	TRUE
Eubacterium sp. 38_16 & CAG:146	0.560333	1.97028e-07	6.54587e-07	0.532338	7.64543e-08	1.60331e-07	2.57707	0.0395629	TRUE
Eubacterium sp. CAG:115	0.30057	2.82353e-07	9.46975e-07	0.331675	1.18198e-07	5.19017e-07	2.38881	0.666156	FALSE
Eubacterium sp. CAG:156	0.358052	1.75843e-07	1.17232e-06	0.126036	1.88063e-08	1.08281e-07	9.35025	1.40748e-29	TRUE
Eubacterium sp. CAG:161	0.326898	5.80791e-08	2.23469e-07	0.155887	8.94682e-09	5.65138e-08	6.49159	6.94368e-19	TRUE
Eubacterium sp. CAG:180	0.42036	2.08632e-06	7.40154e-06	0.68325	1.7589e-06	3.96923e-06	1.18615	8.31239e-31	TRUE
Eubacterium sp. CAG:192	0.375603	1.34162e-07	5.23664e-07	0.0895522	8.12236e-09	6.16228e-08	16.5176	2.9398e-43	TRUE
Eubacterium sp. CAG:248	0.313734	5.00033e-07	2.65978e-06	0.553897	2.85068e-07	9.24321e-07	1.75408	6.61932e-22	TRUE
Eubacterium sp. CAG:251 / Clostridium sp. A254.MGS-251	0.297938	8.0853e-07	3.21975e-06	0.55058	6.91146e-07	1.93073e-06	1.16984	5.56099e-23	TRUE
Eubacterium sp. CAG:252	0.18473	3.54969e-07	2.57875e-06	0.384743	3.36876e-07	1.07227e-06	1.05371	4.50929e-24	TRUE
Eubacterium sp. CAG:274	0.175077	1.13857e-07	6.9139e-07	0.0298507	4.84735e-09	4.48844e-08	23.4886	1.28697e-19	TRUE
Eubacterium sp. CAG:38	0.681439	1.00718e-06	4.03064e-06	0.54063	1.5981e-07	7.3965e-07	6.30237	5.16799e-22	TRUE
Eubacterium sp. CAG:581	0.0930233	2.12311e-07	1.36897e-06	0.366501	4.90441e-07	1.83154e-06	0.432898	6.36297e-59	TRUE
Eubacterium sp. CAG:603 & sp. 2789STDY5608818	0.0184291	6.26133e-08	9.38701e-07	0.127695	1.87542e-07	1.34646e-06	0.333863	4.04554e-32	TRUE
Eubacterium sp. CAG:786	0.00833699	9.00905e-09	1.91877e-07	0.177446	6.17016e-08	3.63753e-07	0.14601	1.2953e-71	TRUE
Eubacterium sp. CAG:841	0.0118473	1.81738e-08	4.70632e-07	0.0613599	9.9207e-08	9.48923e-07	0.183191	6.9144e-13	TRUE
Eubacterium sp. ER2	0.0188679	1.40349e-09	2.11677e-08	0.00331675	1.02215e-10	2.50999e-09	13.7308	0.00376804	TRUE
Eubacterium ventriosum	0.680562	5.45415e-07	1.66921e-06	0.368159	4.65313e-08	1.71255e-07	11.7215	2.84558e-70	TRUE
Faecalibacterium prausnitzii 1 (A2-165)	0.766564	1.69474e-06	2.85575e-06	0.927032	2.05649e-06	4.2655e-06	0.824093	0.000306696	TRUE
Faecalibacterium prausnitzii 2	0.729267	1.76606e-06	2.96928e-06	0.925373	2.74963e-06	4.01684e-06	0.642291	3.25396e-23	TRUE
Faecalibacterium prausnitzii 3 ( L2-6)	0.911365	2.61593e-06	5.00678e-06	0.958541	2.12517e-06	5.45221e-06	1.23093	0.0195938	TRUE
Faecalibacterium prausnitzii 4 (cf. KLE1255)	0.864853	1.92239e-06	3.5164e-06	0.945274	1.29396e-06	2.5201e-06	1.48566	0.00357252	TRUE
Faecalibacterium prausnitzii 5	0.110136	2.23956e-07	1.53202e-06	0.527363	6.92552e-07	2.57233e-06	0.323378	3.90244e-108	TRUE
Faecalibacterium prausnitzii 6	0.446687	3.10899e-07	1.64596e-06	0.762852	4.35872e-07	1.40493e-06	0.713281	5.52855e-35	TRUE
Faecalibacterium prausnitzii 7	0.368144	1.1539e-07	3.42025e-07	0.104478	1.97343e-08	1.00209e-07	5.84718	1.47409e-35	TRUE
Faecalibacterium sp. CAG:1138	0.00526547	3.34742e-08	7.12108e-07	0.0298507	5.15982e-08	7.00217e-07	0.648747	3.87299e-07	TRUE
Faecalibacterium sp. CAG:74	0.504168	1.58291e-06	4.6427e-06	0.708126	5.49952e-07	1.74321e-06	2.87826	0.00356412	TRUE
Faecalibacterium sp. CAG:82	0.544537	3.59956e-07	8.4629e-07	0.850746	7.4093e-07	1.60011e-06	0.485817	1.97554e-26	TRUE
Faecalicatena contorta	0.192628	7.95087e-09	3.29578e-08	0.0298507	1.69329e-09	1.67636e-08	4.69551	6.35557e-22	TRUE
Faecalicatena fissicatena	0.0298376	8.16537e-10	8.26169e-09	0.00497512	1.64791e-11	2.95789e-10	49.5499	0.000301199	TRUE
Faecalicoccus pleomorphus	0.062308	5.00811e-09	4.41307e-08	0.00829187	3.09471e-10	5.19559e-09	16.1828	6.47044e-08	TRUE
Faecalitalea cylindroides	0.136463	3.98601e-08	2.81553e-07	0.00331675	9.56505e-12	2.3488e-10	4167.27	9.30896e-21	TRUE
Faecalitalea sp. UBA637	0.235191	4.02829e-07	1.77755e-06	0.766169	6.21679e-07	2.09525e-06	0.64797	4.51648e-113	TRUE
Fenollaria massiliensis	0.0504607	1.51485e-09	1.5973e-08	0.0381426	7.5573e-10	7.6063e-09	2.00448	0.185342	FALSE
Firmicutes bacterium CAG:102	0.612111	2.6925e-07	4.99876e-07	0.689884	2.29837e-07	6.59346e-07	1.17148	0.646403	FALSE
Firmicutes bacterium CAG:103	0.465994	5.32447e-07	1.91509e-06	0.489221	5.10563e-07	1.82396e-06	1.04286	0.80531	FALSE
Firmicutes bacterium CAG:110	0.436156	3.78016e-07	1.13427e-06	0.694859	4.367e-07	1.05499e-06	0.86562	6.60301e-19	TRUE
Firmicutes bacterium CAG:114	0.494954	1.33146e-07	3.10233e-07	0.124378	3.60387e-08	1.86893e-07	3.69452	4.55669e-56	TRUE
Firmicutes bacterium CAG:124	0.441422	4.57401e-07	1.357e-06	0.742952	5.85945e-07	1.7975e-06	0.780622	1.58416e-25	TRUE
Firmicutes bacterium CAG:129	0.535761	5.91223e-07	1.51167e-06	0.837479	1.24767e-06	2.63369e-06	0.473863	1.12777e-36	TRUE
Firmicutes bacterium CAG:145	0.334796	7.3518e-08	4.99212e-07	0.00829187	5.83116e-10	9.51518e-09	126.078	2.03586e-56	TRUE
Firmicutes bacterium CAG:170	0.189557	6.83403e-08	5.81886e-07	0.628524	2.28129e-07	7.11353e-07	0.299568	1.10157e-104	TRUE
Firmicutes bacterium CAG:176	0.36595	1.09775e-06	3.9791e-06	0.746269	1.31346e-06	4.95491e-06	0.835772	4.51485e-43	TRUE
Firmicutes bacterium CAG:176_63_11	0.30452	2.63532e-07	1.53449e-06	0.59204	2.7017e-07	1.71689e-06	0.97543	9.73502e-26	TRUE
Firmicutes bacterium CAG:194	0.165423	1.08576e-07	5.436e-07	0.568823	2.21126e-07	6.24352e-07	0.491016	9.66956e-83	TRUE
Firmicutes bacterium CAG:212 / Clostridium sp. 2789STDY5834871	0.308469	4.62999e-08	2.25883e-07	0.696517	1.68088e-07	4.5527e-07	0.275451	3.81194e-78	TRUE
Firmicutes bacterium CAG:227	0.325581	1.36598e-07	7.58925e-07	0.320066	6.36692e-08	2.22301e-07	2.14543	0.20278	FALSE
Firmicutes bacterium CAG:238	0.106626	5.13196e-08	3.29903e-07	0.227197	6.58893e-08	2.87626e-07	0.778875	2.08283e-13	TRUE
Firmicutes bacterium CAG:24 / Clostridium sp. 2789STDY5834869 & 2789STDY5834922	0.799473	6.65688e-07	1.51266e-06	0.898839	2.91167e-07	9.05612e-07	2.28628	3.51539e-08	TRUE
Firmicutes bacterium CAG:240	0.202282	2.50203e-07	1.30643e-06	0.233831	6.16137e-08	3.17183e-07	4.06083	0.516083	FALSE
Firmicutes bacterium CAG:272	0.0978499	1.88754e-08	1.33736e-07	0.356551	4.20592e-08	2.24746e-07	0.448781	1.19971e-51	TRUE
Firmicutes bacterium CAG:313	0.0943396	1.19955e-07	9.91244e-07	0.389718	2.60784e-07	1.39355e-06	0.45998	1.44065e-65	TRUE
Firmicutes bacterium CAG:321	0.230803	7.9787e-07	4.81475e-06	0.381426	2.55619e-07	8.53867e-07	3.12132	2.33263e-10	TRUE
Firmicutes bacterium CAG:341	0.17771	3.68747e-07	1.44831e-06	0.238806	2.15612e-07	1.05104e-06	1.71024	0.00858799	TRUE
Firmicutes bacterium CAG:345	0.0627468	7.71674e-08	9.20822e-07	0.288557	3.61986e-08	1.24353e-07	2.13178	5.55796e-51	TRUE
Firmicutes bacterium CAG:41 / Clostridium sp. 2789STDY5834935 & sp. 2789STDY5608853	0.919702	5.96162e-07	9.93239e-07	0.509121	1.10423e-07	2.92159e-07	5.39892	6.31609e-125	TRUE
Firmicutes bacterium CAG:424	0.0381746	1.89163e-08	3.71188e-07	0.0066335	1.01243e-09	2.15177e-08	18.6841	6.15455e-05	TRUE
Firmicutes bacterium CAG:449	0.033348	8.97623e-09	1.21422e-07	0.295191	2.88046e-08	9.06644e-08	0.311625	3.90802e-88	TRUE
Firmicutes bacterium CAG:460	0.0456341	1.21215e-07	1.22978e-06	0.0862355	8.07712e-08	6.23922e-07	1.50072	0.000334646	TRUE
Firmicutes bacterium CAG:475	0.0469504	2.11491e-07	2.4121e-06	0.162521	2.97763e-07	2.44486e-06	0.710266	7.04036e-22	TRUE
Firmicutes bacterium CAG:534	0.022817	2.73777e-08	3.16712e-07	0.101161	7.61744e-08	4.29082e-07	0.359408	6.63059e-18	TRUE
Firmicutes bacterium CAG:536	0.0241334	3.31245e-08	7.62679e-07	0.145937	4.11524e-08	2.56424e-07	0.804921	3.13929e-33	TRUE
Firmicutes bacterium CAG:552	0.0359807	5.53201e-08	5.08207e-07	0.053068	2.31922e-08	2.7295e-07	2.38529	0.109803	FALSE
Firmicutes bacterium CAG:555	0.0236946	2.84548e-08	3.92314e-07	0.0630182	2.38498e-08	2.23488e-07	1.19308	3.6132e-06	TRUE
Firmicutes bacterium CAG:582	0.0355419	3.61029e-08	5.15594e-07	0.207297	1.47365e-07	7.20962e-07	0.244989	1.3101e-46	TRUE
Firmicutes bacterium CAG:631	0.0210619	7.46448e-09	9.59193e-08	0.00165837	0	0	inf	0.000600095	TRUE
Firmicutes bacterium CAG:646	0.0201843	7.12919e-09	1.59584e-07	0.00331675	2.46897e-10	6.06282e-09	28.8751	0.00245486	TRUE
Firmicutes bacterium CAG:65 / Clostridium sp. 2789STDY5608883	0.701624	1.03143e-06	2.94774e-06	0.85738	2.29158e-06	6.68147e-06	0.450098	1.38193e-35	TRUE
Firmicutes bacterium CAG:791	0.00482668	2.58302e-09	5.7461e-08	0.379768	3.20383e-07	9.67158e-07	0.0080623	3.89907e-191	TRUE
Firmicutes bacterium CAG:822	0.00438789	1.44825e-09	3.20706e-08	0.00165837	0	0	inf	0.145948	FALSE
Firmicutes bacterium CAG:83	0.770075	5.18444e-07	1.41605e-06	0.807629	3.38528e-07	1.19669e-06	1.53146	0.00040668	TRUE
Firmicutes bacterium CAG:882	0.0307152	1.62514e-08	2.29796e-07	0.232172	1.46717e-07	1.04727e-06	0.110767	2.71119e-63	TRUE
Firmicutes bacterium CAG:884	0.0078982	8.55394e-09	1.43541e-07	0.0646766	3.70371e-08	2.60553e-07	0.230956	2.63044e-18	TRUE
Firmicutes bacterium CAG:94	0.30452	4.69406e-08	2.05525e-07	0.0116086	3.86504e-10	3.96704e-09	121.449	8.03678e-49	TRUE
Firmicutes bacterium CAG:95	0.390083	1.49218e-07	6.00542e-07	0.689884	2.91233e-07	8.48508e-07	0.512368	1.24725e-36	TRUE
Flavonifractor plautii	0.932427	4.48561e-07	1.25847e-06	0.464345	1.68763e-07	1.03352e-06	2.65793	4.22826e-106	TRUE
Flavonifractor sp. 2789STDY5834895 & sp. 2789STDY5834937 / Clostridium sp. 2789STDY5608878	0.641071	7.99069e-08	1.34426e-07	0.119403	8.30088e-09	4.62999e-08	9.62632	1.12877e-104	TRUE
Flavonifractor sp. 2789STDY5834931	0.306275	1.59429e-07	5.3715e-07	0.0613599	3.83389e-08	7.58035e-07	4.15841	9.02789e-36	TRUE
Flavonifractor sp. An10	0.0601141	7.06782e-09	6.76813e-08	0.013267	9.31657e-10	1.07203e-08	7.5863	2.7842e-06	TRUE
Fournierella massiliensis	0.0201843	5.53926e-09	1.21968e-07	0.00829187	2.02171e-09	3.28805e-08	2.73989	0.0369576	TRUE
Fusicatenibacter saccharivorans	0.928039	1.42483e-06	2.21104e-06	0.893864	6.29778e-07	2.29841e-06	2.26244	4.03879e-48	TRUE
Fusobacterium gonidiaformans	0.0136025	3.31393e-09	1.04094e-07	0.0348259	7.99832e-09	1.16124e-07	0.414328	0.00129613	TRUE
Fusobacterium mortiferum	0.111452	3.63654e-07	3.19082e-06	0.0746269	5.27144e-08	5.092e-07	6.89857	0.00469508	TRUE
Fusobacterium necrophorum	0.000877578	1.13402e-11	5.41367e-10	0.00331675	2.02972e-11	4.98418e-10	0.558708	0.348724	FALSE
Fusobacterium nucleatum subsp. animalis	0.0346643	1.175e-08	4.83951e-07	0.0149254	4.78204e-10	7.42546e-09	24.571	0.0100384	TRUE
Fusobacterium nucleatum subsp. polymorphum	0.00658183	6.45437e-10	1.3221e-08	0.00165837	0	0	inf	0.0682624	FALSE
Fusobacterium periodonticum	0.0219394	2.20904e-09	4.9871e-08	0.00497512	1.02964e-10	1.80673e-09	21.4545	0.00381673	TRUE
Fusobacterium sp. CAG:439	0.0241334	2.32016e-08	3.37115e-07	0.00165837	0	0	inf	0.000221256	TRUE
Fusobacterium ulcerans	0.0495832	2.15042e-08	2.59045e-07	0.00165837	0	0	inf	5.40173e-08	TRUE
Fusobacterium varium	0.0526547	2.35811e-08	3.01356e-07	0.00995025	1.04791e-09	1.74198e-08	22.503	4.02661e-06	TRUE
Gemella sanguinis	0.197016	6.78367e-09	4.48914e-08	0.0613599	1.59617e-09	1.2897e-08	4.24998	1.01187e-15	TRUE
Gemmiger formicilis	0.774024	1.60199e-06	3.57722e-06	0.91874	8.95988e-07	1.89462e-06	1.78795	0.590363	FALSE
Gordonibacter sp. An232A / Coriobacteriaceae bacterium CHKCI002	0.0364195	2.95278e-09	4.8276e-08	0.00331675	6.26575e-11	1.53862e-09	47.1257	1.33272e-05	TRUE
Gordonibacter urolithinfaciens	0.416411	4.13486e-08	1.27769e-07	0.0845771	1.09484e-08	8.59624e-08	3.77667	1.06356e-47	TRUE
Granulicatella adiacens	0.0605529	1.57232e-09	9.85649e-09	0.0364842	1.01708e-09	7.73873e-09	1.54592	0.0226203	TRUE
Haemophilus parahaemolyticus	0.0078982	3.8509e-10	8.46682e-09	0.0248756	1.28818e-09	1.45932e-08	0.298942	0.0012992	TRUE
Haemophilus parainfluenzae	0.614305	3.06185e-07	1.60594e-06	0.696517	3.05345e-07	9.88753e-07	1.00275	6.60103e-07	TRUE
Haemophilus paraphrohaemolyticus	0.0127249	2.19006e-09	5.13078e-08	0.0248756	2.14539e-09	1.90681e-08	1.02082	0.0596443	FALSE
Haemophilus pittmaniae	0.0188679	4.14437e-09	1.28132e-07	0.0414594	2.85435e-09	2.02816e-08	1.45195	0.00254163	TRUE
Haemophilus sp. CCUG 66565	0.0100921	3.95314e-10	5.28211e-09	0.00829187	4.78957e-10	6.19372e-09	0.825364	0.522171	FALSE
Haemophilus sputorum	0.0109697	7.83273e-10	1.01664e-08	0.0199005	1.92824e-09	1.71859e-08	0.406211	0.145948	FALSE
Hafnia paralvei	0.0206231	4.66117e-09	1.25893e-07	0.00331675	1.14795e-11	2.81891e-10	406.043	0.00208879	TRUE
Helicobacter winghamensis	0.000877578	1.11222e-11	5.30959e-10	0.00165837	0	0	inf	0.634965	FALSE
Holdemanella biformis	0.132953	1.94988e-07	1.00098e-06	0.689884	4.71742e-07	1.34625e-06	0.413336	3.27219e-152	TRUE
Holdemania filiformis	0.634928	4.11165e-08	8.16587e-08	0.0995025	3.97569e-09	2.45879e-08	10.342	2.81205e-108	TRUE
Holdemania massiliensis	0.252304	2.05019e-08	6.49094e-08	0.109453	1.14966e-08	1.51638e-07	1.78329	3.00174e-14	TRUE
Holdemania sp. Marseille-P2844	0.151382	1.59623e-08	6.49955e-08	0.0066335	4.09246e-10	6.69451e-09	39.0042	4.76457e-22	TRUE
Hungatella hathewayi 1	0.337867	3.87758e-08	6.5324e-07	0.0845771	2.13218e-08	1.63753e-07	1.8186	1.63465e-31	TRUE
Hungatella hathewayi 2	0.380869	5.48422e-08	5.07455e-07	0.101161	2.50513e-08	2.80365e-07	2.1892	1.89107e-35	TRUE
Intestinibacter bartlettii	0.580079	1.15228e-07	4.68524e-07	0.545605	9.28662e-08	3.46945e-07	1.24079	0.0441931	TRUE
Intestinimonas butyriciproducens	0.584467	5.24964e-08	1.90101e-07	0.208955	1.25273e-08	6.22867e-08	4.19057	1.47436e-56	TRUE
Intestinimonas massiliensis	0.33699	3.99938e-08	1.5873e-07	0.0845771	9.21755e-09	6.01223e-08	4.33888	5.8707e-32	TRUE
Klebsiella aerogenes	0.0544098	3.65268e-08	6.91295e-07	0.0829187	1.49675e-08	1.55341e-07	2.4404	0.0165678	TRUE
Klebsiella michiganensis 1	0.0487056	2.3761e-08	5.2716e-07	0.0381426	5.02837e-09	7.11715e-08	4.72538	0.257864	FALSE
Klebsiella michiganensis 2	0.0557262	1.8376e-08	3.43097e-07	0.0563847	6.57686e-09	1.04329e-07	2.79404	0.941209	FALSE
Klebsiella oxytoca	0.0254498	9.15495e-09	2.01189e-07	0.0281924	5.18528e-10	4.05664e-09	17.6556	0.873211	FALSE
Klebsiella pneumoniae	0.322949	5.34743e-07	3.41471e-06	0.668325	9.92872e-07	4.75694e-06	0.538582	1.56981e-55	TRUE
Klebsiella quasipneumoniae	0.112769	4.11938e-08	8.49206e-07	0.429519	1.8531e-07	8.51222e-07	0.222296	1.26737e-77	TRUE
Klebsiella variicola	0.110575	5.5414e-08	1.02911e-06	0.374793	8.58701e-08	3.84211e-07	0.645324	1.87796e-54	TRUE
Kluyvera georgiana	0.0118473	3.55187e-09	1.00049e-07	0.0381426	4.73815e-09	5.5605e-08	0.749632	3.35398e-05	TRUE
Lachnoanaerobaculum saburreum	0.00877578	1.91307e-09	6.10793e-08	0.00331675	2.29997e-11	5.64782e-10	83.178	0.0973081	FALSE
Lachnoclostridium phytofermentans 2	0.00175516	2.28778e-11	6.79604e-10	0.00165837	0	0	inf	0.408276	FALSE
Lachnoclostridium sp. An118	0.0293989	2.41941e-09	2.77481e-08	0.00497512	2.62402e-09	6.14435e-08	0.922025	0.000375474	TRUE
Lachnoclostridium sp. An138	0.131637	5.23746e-09	2.55921e-08	0.00331675	5.48107e-11	1.34593e-09	95.5555	6.74324e-20	TRUE
Lachnoclostridium sp. An14	0.0127249	2.56883e-09	7.84238e-08	0.00165837	0	0	inf	0.0089492	TRUE
Lachnospira sp. 2789STDY5834967 / Clostridiales bacterium KLE1615 & 41_12_two_minus	0.830189	3.85443e-07	6.77535e-07	0.824212	2.29038e-07	3.42991e-07	1.68288	0.000746739	TRUE
Lachnospiraceae bacterium 2_1_46FAA	0.0293989	1.77184e-08	2.7213e-07	0.00165837	0	0	inf	4.03307e-05	TRUE
Lachnospiraceae bacterium TF01-11 / Clostridium sp. CAG:122	0.335674	1.65317e-07	6.23879e-07	0.293532	2.23542e-08	7.32573e-08	7.39536	0.000160113	TRUE
Lactobacillus acidophilus	0.022817	3.53506e-09	7.86353e-08	0.00829187	1.13331e-08	2.59992e-07	0.311923	0.0169516	TRUE
Lactobacillus agilis	0.000438789	0	0	0.00497512	3.41214e-09	8.13281e-08	0	0.00858799	TRUE
Lactobacillus amylovorus	0.0105309	4.06795e-08	1.0517e-06	0.026534	6.37898e-09	1.11994e-07	6.37711	0.00678441	TRUE
Lactobacillus casei == paracasei	0.0824923	6.58021e-09	6.31007e-08	0.0281924	1.9019e-09	2.31066e-08	3.45982	4.37005e-06	TRUE
Lactobacillus crispatus	0.0381746	5.64378e-09	1.01502e-07	0.039801	1.11902e-08	1.65248e-07	0.50435	0.960425	FALSE
Lactobacillus delbrueckii	0.0702062	9.13474e-09	1.53486e-07	0.079602	1.30561e-08	1.22201e-07	0.699655	0.437745	FALSE
Lactobacillus farciminis	0.000438789	0	0	0.00165837	0	0		1	FALSE
Lactobacillus fermentum	0.0587977	2.65458e-08	6.32545e-07	0.0646766	3.01587e-08	5.27477e-07	0.880204	0.6631	FALSE
Lactobacillus gallinarum	0.00307152	1.20571e-10	2.75766e-09	0.00995025	8.10014e-09	1.89817e-07	0.0148851	0.0581206	FALSE
Lactobacillus gasseri 1	0.0241334	2.56628e-09	3.91774e-08	0.00497512	1.10876e-10	1.97367e-09	23.1455	0.00192972	TRUE
Lactobacillus gasseri 2	0.0535323	2.16065e-08	5.90566e-07	0.0381426	4.07073e-09	4.49729e-08	5.30778	0.11984	FALSE
Lactobacillus johnsonii	0.00877578	7.6541e-09	2.92601e-07	0.0066335	3.318e-10	5.17379e-09	23.0684	0.433371	FALSE
Lactobacillus mucosae	0.0552874	2.79551e-08	5.28729e-07	0.179104	2.65884e-08	1.40905e-07	1.0514	2.22786e-22	TRUE
Lactobacillus oris	0.0153576	1.90223e-09	5.14036e-08	0.026534	3.48425e-09	4.85541e-08	0.545951	0.111362	FALSE
Lactobacillus parabuchneri	0.00175516	3.82196e-11	1.07022e-09	0.00165837	0	0	inf	0.408276	FALSE
Lactobacillus reuteri	0.0100921	8.06558e-09	2.00907e-07	0.00497512	6.85112e-11	1.40377e-09	117.726	0.151884	FALSE
Lactobacillus rogosae	0.6086	1.70161e-06	4.99237e-06	0.635158	9.56183e-07	4.92235e-06	1.77958	0.178918	FALSE
Lactobacillus ruminis	0.0557262	3.81529e-08	3.17799e-07	0.646766	5.93072e-07	1.73914e-06	0.0643309	9.08411e-244	TRUE
Lactobacillus salivarius	0.087319	7.88824e-08	1.41176e-06	0.104478	1.99603e-08	2.41194e-07	3.95198	0.264488	FALSE
Lactobacillus vaginalis	0.0171128	7.11553e-08	3.30819e-06	0.0116086	3.25512e-10	4.93713e-09	218.595	0.264442	FALSE
Lactococcus lactis subsp. cremoris	0.0991663	4.77082e-09	4.05261e-08	0.0066335	4.91497e-11	7.57992e-10	97.0671	7.16268e-14	TRUE
Lactococcus lactis subsp. lactis	0.207986	3.01244e-08	2.79847e-07	0.318408	1.32938e-07	2.00432e-06	0.226605	1.23547e-08	TRUE
Leuconostoc mesenteroides	0.0421237	1.5458e-09	1.58606e-08	0.0116086	3.3334e-10	4.58191e-09	4.63731	0.000278444	TRUE
Libanicoccus massiliensis	0.0193067	5.28128e-10	6.30442e-09	0.368159	9.94593e-08	3.87809e-07	0.00530999	1.7708e-154	TRUE
Massiliomicrobiota sp. An80 & An105 & An134 & An142	0.13778	1.05509e-08	9.32136e-08	0.00165837	0	0	inf	1.9037e-21	TRUE
Massiliomicrobiota timonensis	0.151382	9.24536e-09	4.97799e-08	0.00497512	3.11476e-10	7.23372e-09	29.6824	1.41522e-22	TRUE
Mediterranea massiliensis	0.00833699	5.17007e-08	1.57036e-06	0.00331675	7.29979e-11	1.79254e-09	708.25	0.112318	FALSE
Megamonas funiformis == rupellensis	0.251426	1.8271e-06	8.73273e-06	0.175788	4.96747e-07	4.99539e-06	3.67814	3.56176e-05	TRUE
Megasphaera elsdenii	0.0245722	5.95537e-08	6.42709e-07	0.0845771	1.17955e-07	9.55362e-07	0.504886	2.10492e-11	TRUE
Megasphaera massiliensis	0.0171128	2.21896e-08	3.65384e-07	0.013267	1.39065e-07	3.34633e-06	0.159563	0.408276	FALSE
Megasphaera micronuciformis	0.0846863	1.82435e-08	2.75718e-07	0.079602	1.80946e-08	3.90785e-07	1.00823	0.629319	FALSE
Megasphaera sp. ASD88 & An286	0.00658183	4.35169e-09	8.16105e-08	0.00165837	0	0	inf	0.0682624	FALSE
Megasphaera sp. BL7 & NM10	0.0855638	2.23523e-07	2.22091e-06	0.45937	2.12646e-06	1.5178e-05	0.105115	5.46773e-107	TRUE
Merdimonas faecis	0.114524	2.67262e-08	2.39343e-07	0.00995025	2.32464e-09	4.86521e-08	11.4969	3.89673e-15	TRUE
Methanobrevibacter smithii 1	0.247477	6.14678e-07	4.04592e-06	0.500829	4.09456e-07	1.53282e-06	1.50121	4.64242e-32	TRUE
Methanobrevibacter smithii 2	0.064502	1.63522e-07	1.94515e-06	0.0779436	1.80349e-07	1.73e-06	0.906699	0.366767	FALSE
Methanosphaera stadtmanae	0.0447565	1.04642e-08	1.10034e-07	0.243781	5.34077e-08	2.20814e-07	0.195931	4.55483e-53	TRUE
Mitsuokella jalaludinii	0.0359807	2.73605e-08	3.89462e-07	0.373134	4.16264e-07	1.69689e-06	0.0657288	6.31609e-125	TRUE
Mitsuokella multacida	0.0386134	6.57939e-08	7.5799e-07	0.276949	3.80366e-07	2.77159e-06	0.172975	3.67372e-72	TRUE
Mobilibacterium timonense	0.00307152	3.01618e-10	8.148e-09	0.0199005	2.49933e-08	5.26857e-07	0.012068	1.47035e-05	TRUE
Mollicutes bacterium Phil14	0.00131637	1.1207e-09	5.30501e-08	0.0066335	2.01813e-10	3.26964e-09	5.55315	0.0416624	TRUE
Morganella morganii	0.00965336	1.20274e-09	3.59447e-08	0.0232172	2.35209e-09	4.88698e-08	0.511348	0.0178089	TRUE
Mycoplasma sp. CAG:472	0.0535323	1.24028e-07	9.1546e-07	0.220564	3.05363e-07	1.59416e-06	0.406166	7.48601e-36	TRUE
Mycoplasma sp. CAG:611	0.0658183	1.02777e-07	7.00037e-07	0.170813	1.20961e-07	6.57179e-07	0.84967	2.0183e-14	TRUE
Mycoplasma sp. CAG:776	0.00965336	2.01126e-08	4.68692e-07	0.00165837	0	0	inf	0.0243101	TRUE
Mycoplasma sp. CAG:877	0.00921457	2.87638e-08	4.75129e-07	0.112769	1.03118e-07	6.23138e-07	0.278941	5.4239e-38	TRUE
Mycoplasma sp. CAG:956	0.01448	1.28757e-08	1.72886e-07	0.189055	1.15185e-07	5.74293e-07	0.111782	1.51195e-65	TRUE
Negativibacillus massiliensis	0.219833	6.69539e-08	3.21173e-07	0.026534	3.21764e-09	5.59657e-08	20.8084	3.14837e-28	TRUE
Neglecta timonensis	0.0754717	1.37695e-08	1.16782e-07	0.00165837	0	0	inf	8.91322e-12	TRUE
Odoribacter laneus	0.0245722	3.15158e-08	3.92482e-07	0.00829187	7.18181e-09	1.75454e-07	4.38828	0.00962217	TRUE
Odoribacter splanchnicus	0.808249	7.02342e-07	9.15656e-07	0.701493	2.25852e-07	4.7957e-07	3.10974	5.06782e-49	TRUE
Olsenella sp. An188	0.0078982	1.12675e-09	3.03205e-08	0.00497512	1.63057e-10	2.83785e-09	6.91014	0.299352	FALSE
Olsenella sp. KH3B4	0.00131637	3.71127e-11	1.35089e-09	0.0165837	1.15478e-08	2.02408e-07	0.00321383	1.18209e-06	TRUE
Olsenella sp. Marseille-P2300	0.0267661	1.31612e-09	1.24392e-08	0.00995025	2.18655e-10	2.68043e-09	6.01917	0.011298	TRUE
Olsenella sp. Marseille-P2912	0.0329092	4.05665e-09	4.84576e-08	0.013267	1.97604e-10	1.98817e-09	20.5291	0.00775398	TRUE
Olsenella sp. Marseille-P3256	0.00219394	1.26546e-10	3.4611e-09	0.00165837	0	0	inf	0.339195	FALSE
Oribacterium sinus	0.0535323	3.23719e-09	8.17799e-08	0.013267	2.02819e-10	2.23364e-09	15.961	1.85558e-05	TRUE
Oscillibacter sp. 57_20	0.698552	5.67595e-07	1.00101e-06	0.900498	9.42219e-07	1.79755e-06	0.602403	1.0445e-07	TRUE
Oscillibacter sp. CAG:155	0.0460728	8.09547e-09	8.69133e-08	0.013267	1.60232e-09	1.72837e-08	5.05235	0.000197958	TRUE
Oscillibacter sp. CAG:241	0.166301	2.65802e-07	1.74373e-06	0.606965	8.36011e-07	3.05552e-06	0.31794	1.75823e-95	TRUE
Oscillibacter sp. ER4 / Firmicutes bacterium CAG:129_59_24	0.686705	1.38186e-06	2.20171e-06	0.907131	1.52339e-06	2.44906e-06	0.907101	1.65346e-05	TRUE
Oscillibacter sp. KLE 1728 & KLE 1745 / Oscillospiraceae VE202-24	0.917069	4.89177e-07	8.34198e-07	0.349917	1.39925e-07	8.21854e-07	3.496	3.12325e-154	TRUE
Oxalobacter formigenes 1	0.1448	1.91052e-08	1.00798e-07	0.0215589	5.35901e-10	5.45235e-09	35.6506	5.67681e-17	TRUE
Oxalobacter formigenes 2	0.00526547	3.33641e-10	1.01892e-08	0.00165837	0	0	inf	0.107495	FALSE
Parabacteroides distasonis	0.895568	2.10386e-06	3.79674e-06	0.754561	2.70744e-07	7.51573e-07	7.77066	1.05679e-118	TRUE
Parabacteroides goldsteinii	0.327775	8.50212e-08	3.65281e-07	0.170813	2.76806e-08	2.34655e-07	3.07151	2.52837e-15	TRUE
Parabacteroides gordonii	0.0974111	7.15628e-09	5.98898e-08	0.0613599	1.97917e-09	1.23464e-08	3.61581	0.00582411	TRUE
Parabacteroides johnsonii	0.143484	9.42938e-08	5.15541e-07	0.0232172	3.85464e-09	4.21651e-08	24.4624	3.86451e-16	TRUE
Parabacteroides merdae	0.731461	1.83428e-06	3.57646e-06	0.470978	3.18255e-07	1.65913e-06	5.76354	6.00673e-64	TRUE
Parabacteroides sp. CAG:409	0.0364195	4.35278e-08	4.0954e-07	0.0232172	8.97531e-09	1.16812e-07	4.84972	0.0898392	FALSE
Parabacteroides sp. SN4	0.0276437	1.35372e-08	1.72594e-07	0.339967	5.77913e-08	2.00753e-07	0.234244	1.08803e-119	TRUE
Paraprevotella clara	0.249232	3.77768e-07	1.33757e-06	0.127695	5.69785e-08	3.0731e-07	6.63001	1.58149e-12	TRUE
Paraprevotella xylaniphila	0.0285213	5.40727e-08	4.76955e-07	0.0348259	7.72388e-09	7.10057e-08	7.00072	0.59118	FALSE
Parasutterella excrementihominis	0.484862	2.22767e-07	5.97136e-07	0.190713	4.16903e-08	1.91116e-07	5.34338	3.7649e-41	TRUE
Parvimonas micra	0.0671347	6.333e-09	9.91213e-08	0.0248756	6.22816e-10	5.2762e-09	10.1683	7.48254e-05	TRUE
Parvimonas sp. KA00067	0.0118473	4.36801e-10	7.50826e-09	0.0248756	2.25073e-09	3.14192e-08	0.194071	0.0362568	TRUE
Peptoniphilus harei	0.0232558	3.74784e-10	5.15413e-09	0.00497512	1.0718e-10	2.41606e-09	3.49677	0.00252638	TRUE
Peptoniphilus lacrimalis	0.0320316	1.05094e-09	1.99967e-08	0.0116086	1.63855e-10	1.90176e-09	6.41384	0.00522468	TRUE
Peptoniphilus senegalensis	0.00658183	1.2387e-10	1.98371e-09	0.00497512	5.83981e-11	1.03975e-09	2.12113	0.439456	FALSE
Peptostreptococcus anaerobius	0.0153576	3.67652e-10	5.84445e-09	0.0116086	3.39208e-10	4.15085e-09	1.08386	0.400689	FALSE
Peptostreptococcus sp. MV1	0.00307152	9.60096e-11	2.75593e-09	0.0066335	2.03739e-10	3.61773e-09	0.471237	0.398342	FALSE
Peptostreptococcus stomatis	0.0263273	3.11196e-09	9.57151e-08	0.00995025	1.27814e-10	1.41591e-09	24.3477	0.0123057	TRUE
Phascolarctobacterium sp. CAG:207	0.586661	1.29359e-06	2.56134e-06	0.149254	2.12008e-07	1.26193e-06	6.10161	8.32806e-79	TRUE
Phascolarctobacterium sp. CAG:266	0.117595	1.70421e-07	7.50293e-07	0.0165837	7.73831e-09	9.81749e-08	22.023	5.61647e-14	TRUE
Phascolarctobacterium succinatutens	0.168056	4.74554e-07	1.91688e-06	0.681592	1.38171e-06	2.48276e-06	0.343455	4.86647e-123	TRUE
Phocea massiliensis	0.566477	2.88278e-08	7.41552e-08	0.109453	4.28261e-09	1.83283e-08	6.73136	1.44097e-78	TRUE
Plesiomonas shigelloides	0.00263273	3.06996e-10	1.26163e-08	0.026534	1.56582e-08	2.47765e-07	0.0196061	4.67869e-09	TRUE
Porphyromonas asaccharolytica	0.0223782	1.78492e-09	3.70725e-08	0.00829187	2.03338e-10	3.22329e-09	8.77808	0.0187794	TRUE
Porphyromonas endodontalis	0.00263273	1.89144e-10	6.80472e-09	0.00497512	1.68138e-09	2.95463e-08	0.112494	0.642404	FALSE
Porphyromonas somerae	0.0272049	9.29331e-10	1.16942e-08	0.0199005	3.18504e-10	2.63891e-09	2.9178	0.264488	FALSE
Porphyromonas sp. HMSC065F10	0.0114085	1.25291e-09	2.13731e-08	0.00331675	4.62976e-11	1.13689e-09	27.062	0.0415542	TRUE
Prevotella bivia	0.0969724	4.77954e-09	4.65281e-08	0.0547264	1.3619e-09	9.96606e-09	3.50946	0.001154	TRUE
Prevotella buccae	0.016674	6.50022e-08	2.12229e-06	0.0116086	6.78943e-09	1.39799e-07	9.57403	0.295648	FALSE
Prevotella copri 1	0.488372	1.06853e-05	3.05019e-05	0.932007	2.37622e-05	2.90317e-05	0.449678	1.52064e-131	TRUE
Prevotella copri 2	0.143045	1.33693e-06	8.09505e-06	0.885572	1.27771e-05	1.75768e-05	0.104635	1.19766e-303	TRUE
Prevotella corporis	0.0860026	4.8623e-09	6.88702e-08	0.0630182	2.14288e-09	1.14303e-08	2.26904	0.0846648	FALSE
Prevotella denticola	0.00175516	3.27436e-11	1.04051e-09	0.00497512	1.18825e-10	2.34283e-09	0.275561	0.330299	FALSE
Prevotella disiens	0.0631856	2.43343e-09	2.65938e-08	0.0696517	2.76373e-09	3.28253e-08	0.880487	0.680915	FALSE
Prevotella intermedia	0.00263273	1.71147e-10	5.93545e-09	0.00995025	8.17269e-10	1.57907e-08	0.209413	0.0316691	TRUE
Prevotella jejuni	0.00965336	4.54027e-10	8.34383e-09	0.00331675	5.8021e-10	1.42477e-08	0.782521	0.0741615	FALSE
Prevotella melaninogenica	0.0456341	1.64646e-08	6.82793e-07	0.00829187	3.49533e-09	8.41433e-08	4.71044	1.54921e-05	TRUE
Prevotella salivae	0.0039491	1.15937e-09	3.75419e-08	0.00331675	3.02974e-10	7.43984e-09	3.82663	0.502005	FALSE
Prevotella sp. 109 & CAG:255	0.064502	3.09128e-07	2.49056e-06	0.0066335	7.63434e-11	1.10366e-09	4049.18	9.98907e-09	TRUE
Prevotella sp. 885	0.0381746	1.59035e-07	2.697e-06	0.718076	3.19982e-06	8.47661e-06	0.0497011	0	TRUE
Prevotella sp. CAG:1058	0.00658183	1.57091e-08	3.70276e-07	0.00165837	0	0	inf	0.0682624	FALSE
Prevotella sp. CAG:1092	0.0171128	3.8817e-08	5.68179e-07	0.545605	1.05295e-06	2.83683e-06	0.0368649	1.49975e-257	TRUE
Prevotella sp. CAG:1124	0.0105309	9.3125e-08	2.20894e-06	0.00165837	0	0	inf	0.0183501	TRUE
Prevotella sp. CAG:1185	0.00526547	3.97646e-08	1.04852e-06	0.00165837	0	0	inf	0.107495	FALSE
Prevotella sp. CAG:1320	0.00438789	3.82245e-08	1.4727e-06	0.00165837	0	0	inf	0.145948	FALSE
Prevotella sp. CAG:386	0.0785432	6.35494e-07	5.78541e-06	0.812604	6.489e-06	1.1544e-05	0.097934	0	TRUE
Prevotella sp. CAG:485	0.01448	1.77729e-08	2.50195e-07	0.00165837	0	0	inf	0.00502543	TRUE
Prevotella sp. CAG:520	0.0530935	3.1813e-07	3.61042e-06	0.605307	2.71909e-06	7.01498e-06	0.116999	2.68571e-226	TRUE
Prevotella sp. CAG:604	0.0535323	4.16365e-07	4.1048e-06	0.784411	5.40116e-06	1.05877e-05	0.0770881	0	TRUE
Prevotella sp. CAG:617	0.0118473	3.41756e-08	4.87798e-07	0.00497512	5.67114e-10	1.06755e-08	60.2624	0.0884652	FALSE
Prevotella sp. CAG:732	0.0219394	1.21086e-07	3.00991e-06	0.517413	2.15925e-06	5.69238e-06	0.0560779	2.5575e-232	TRUE
Prevotella sp. CAG:755	0.00570426	8.31648e-09	1.93366e-07	0.00165837	0	0	inf	0.0922911	FALSE
Prevotella sp. CAG:891	0.0236946	9.65124e-08	1.15991e-06	0.0116086	7.86454e-10	1.66483e-08	122.718	0.050323	FALSE
Prevotella sp. CAG:924	0.00833699	8.03719e-08	1.69778e-06	0.00165837	0	0	inf	0.038066	TRUE
Prevotella sp. KHD1 & AG:487_50_53 & CAG:487	0.0430013	6.44007e-08	4.97279e-07	0.00995025	8.56832e-10	1.64037e-08	75.1614	7.65243e-05	TRUE
Prevotella sp. P4-51 & PA-67 & P5-64 & P5-108 & CAG:474	0.0381746	5.99133e-08	5.57323e-07	0.562189	8.78244e-07	2.34768e-06	0.0682195	1.56733e-223	TRUE
Prevotella sp. P4-65 & P4-76 & P5-60 & P5-119 & P5-125 & CAG:592	0.0263273	8.90322e-08	9.58326e-07	0.315091	5.03193e-07	2.2166e-06	0.176934	2.09359e-108	TRUE
Prevotella sp. UBA630	0.00877578	5.89728e-08	1.61094e-06	0.104478	3.97091e-07	2.37349e-06	0.148512	3.53978e-35	TRUE
Prevotella sp. UBA641	0.00307152	1.84617e-08	5.84813e-07	0.422886	1.56231e-06	4.87155e-06	0.0118169	1.30069e-220	TRUE
Prevotella stercorea	0.115401	1.14834e-06	8.02311e-06	0.560531	1.95345e-06	5.69111e-06	0.587853	3.74263e-125	TRUE
Prevotella timonensis	0.0829311	2.85884e-09	3.01547e-08	0.0679934	3.14767e-09	3.83908e-08	0.908241	0.221693	FALSE
Prevotella veroralis	0.000438789	0	0	0.00331675	2.16183e-11	5.30861e-10	0	0.066625	FALSE
Prevotellamassilia timonensis	0.0487056	2.11233e-07	1.96128e-06	0.638474	2.74622e-06	5.69915e-06	0.0769176	2.65918e-256	TRUE
Proteobacteria bacterium CAG:495	0.0535323	2.17326e-07	2.60683e-06	0.013267	3.19345e-09	5.51022e-08	68.0537	1.6801e-05	TRUE
Proteus mirabilis	0.0109697	2.62766e-09	8.69731e-08	0.00829187	2.37106e-10	3.68533e-09	11.0822	0.419925	FALSE
Proteus mirabilis 2	0.00175516	2.30492e-10	9.96599e-09	0.00165837	0	0	inf	0.408276	FALSE
Providencia rettgeri 2	0.000438789	0	0	0.0066335	2.49634e-11	3.54227e-10	0	0.00117079	TRUE
Pseudoflavonifractor capillosus	0.136463	4.60368e-09	1.9226e-08	0.0149254	6.57393e-10	7.12607e-09	7.00293	5.06204e-17	TRUE
Pseudoflavonifractor sp. An184	0.182097	2.25088e-08	1.8766e-07	0.0364842	2.64743e-09	2.01623e-08	8.50212	2.43809e-18	TRUE
Pyramidobacter piscolens	0.0640632	8.45388e-09	9.11074e-08	0.0331675	1.50472e-09	1.65242e-08	5.61824	0.00343448	TRUE
Raoultella ornithinolytica	0.0329092	1.5578e-08	4.15278e-07	0.0165837	7.0037e-09	1.14407e-07	2.22425	0.0304098	TRUE
Rhodospirillum sp. UNK.MGS-17 / Azospirillum sp. 47_25 & CAG:260	0.164985	1.98325e-07	1.20733e-06	0.0116086	5.58281e-09	9.08995e-08	35.5243	7.89675e-23	TRUE
Rikenella microfusus	0.00482668	8.52487e-09	2.64307e-07	0.00165837	0	0	inf	0.125286	FALSE
Romboutsia timonensis	0.633611	2.55771e-07	1.33824e-06	0.610282	4.1473e-07	1.32314e-06	0.616717	0.635835	FALSE
Roseburia faecis	0.82975	2.62424e-06	4.83601e-06	0.912106	2.07558e-06	3.70082e-06	1.26434	0.0586428	FALSE
Roseburia hominis	0.838087	4.89911e-07	1.16656e-06	0.81592	2.94662e-07	7.54543e-07	1.66262	2.03602e-09	TRUE
Roseburia intestinalis	0.7319	1.10014e-06	2.62366e-06	0.59204	2.831e-07	6.96377e-07	3.88606	3.14297e-21	TRUE
Roseburia inulinivorans	0.898201	1.53663e-06	3.44718e-06	0.943615	1.47787e-06	2.73043e-06	1.03976	0.0147143	TRUE
Roseburia sp. CAG:100	0.27907	1.50317e-07	7.63796e-07	0.557214	2.46752e-07	8.98405e-07	0.609185	1.38085e-36	TRUE
Roseburia sp. CAG:182	0.165862	5.03901e-08	7.27498e-07	0.393035	1.39296e-07	7.81055e-07	0.361749	1.45786e-31	TRUE
Roseburia sp. CAG:197	0.148749	7.40801e-08	4.0038e-07	0.208955	1.11324e-07	5.75679e-07	0.665446	0.00192511	TRUE
Roseburia sp. CAG:303	0.150505	7.75927e-08	5.12336e-07	0.0281924	1.36828e-09	1.38689e-08	56.7081	2.49966e-16	TRUE
Roseburia sp. CAG:309	0.0039491	3.99749e-09	1.24601e-07	0.00497512	6.81493e-11	1.2363e-09	58.6578	0.947155	FALSE
Roseburia sp. CAG:380	0.114524	8.40089e-08	4.76993e-07	0.233831	4.29881e-08	2.05766e-07	1.95424	1.95144e-11	TRUE
Roseburia sp. CAG:45 & sp. 2789STDY5608886	0.560772	6.52226e-07	2.69714e-06	0.742952	6.72998e-07	2.36492e-06	0.969134	2.77214e-18	TRUE
Roseburia sp. CAG:471	0.179903	5.20701e-08	2.83774e-07	0.563847	1.19966e-07	2.94284e-07	0.434042	2.31318e-79	TRUE
Ruminococcaceae bacterium D16	0.163229	3.92196e-08	2.46253e-07	0.0116086	2.59036e-10	3.1049e-09	151.406	1.1698e-22	TRUE
Ruminococcaceae bacterium D5	0.150066	1.2434e-08	7.23715e-08	0.0464345	3.75391e-09	3.65689e-08	3.31229	1.70639e-11	TRUE
Ruminococcus bicirculans	0.715665	2.21038e-06	6.76153e-06	0.656716	3.05736e-07	1.03701e-06	7.22969	2.91855e-23	TRUE
Ruminococcus bromii 2	0.732339	4.35766e-06	9.46447e-06	0.749585	1.25083e-06	3.29549e-06	3.48381	2.08942e-10	TRUE
Ruminococcus callidus	0.300132	2.20681e-07	7.47189e-07	0.636816	2.6578e-07	6.93783e-07	0.830315	2.1741e-39	TRUE
Ruminococcus champanellensis	0.0535323	3.78033e-08	2.95695e-07	0.155887	8.12828e-08	5.98458e-07	0.465084	2.81739e-16	TRUE
Ruminococcus faecis	0.79728	9.67683e-07	2.00511e-06	0.872305	1.18816e-06	2.45281e-06	0.814436	4.40556e-08	TRUE
Ruminococcus gnavus	0.66301	9.40694e-07	4.18833e-06	0.260365	1.24321e-07	7.82543e-07	7.56665	7.13354e-65	TRUE
Ruminococcus lactaris	0.488372	4.38157e-07	1.03962e-06	0.378109	1.91912e-07	6.23911e-07	2.28311	5.59069e-11	TRUE
Ruminococcus sp. 2789STDY5608794 & sp. 2789STDY5834890 / Firmicutes bacterium CAG:56	0.643265	3.76709e-07	7.82084e-07	0.691542	1.78787e-07	5.35114e-07	2.10702	1.61684e-07	TRUE
Ruminococcus sp. 2789STDY5608817 / Eubacterium sp. 2789STDY5834872	0.678806	1.00871e-07	1.95394e-07	0.787728	1.07854e-07	2.50341e-07	0.935257	0.0922911	FALSE
Ruminococcus sp. 37_24 & sp. 2789STDY5834934	0.093462	7.26673e-08	3.62242e-07	0.00331675	2.99111e-09	7.34499e-08	24.2944	6.21602e-14	TRUE
Ruminococcus sp. A254.MGS-254 & CAG:254	0.248355	2.28578e-07	8.86596e-07	0.595357	2.11054e-07	4.61432e-07	1.08303	6.10164e-45	TRUE
Ruminococcus sp. CAG:17 & Blautia sp. 2789STDY5608880	0.32251	2.88178e-07	1.05059e-06	0.421227	7.72368e-08	2.43e-07	3.73109	0.0398606	TRUE
Ruminococcus sp. CAG:177	0.283458	7.85028e-07	3.2604e-06	0.555556	1.14735e-06	3.63516e-06	0.684207	9.7206e-32	TRUE
Ruminococcus sp. CAG:330	0.0482668	3.46855e-08	2.97992e-07	0.263682	7.30449e-08	3.22928e-07	0.474852	4.92545e-55	TRUE
Ruminococcus sp. CAG:353 & sp. 2789STDY5834938	0.114524	1.81229e-07	1.11478e-06	0.356551	2.38601e-07	9.76427e-07	0.759551	3.18044e-41	TRUE
Ruminococcus sp. CAG:382	0.0592365	2.57517e-08	1.5657e-07	0.495854	8.55146e-08	1.84292e-07	0.301138	1.10613e-145	TRUE
Ruminococcus sp. CAG:403	0.056165	2.82566e-08	2.76311e-07	0.150912	2.0423e-08	1.18858e-07	1.38357	1.10834e-13	TRUE
Ruminococcus sp. CAG:488	0.0390522	5.61271e-08	5.17794e-07	0.394693	4.01478e-07	1.39274e-06	0.139801	1.79705e-128	TRUE
Ruminococcus sp. CAG:563	0.00877578	6.84583e-09	1.17945e-07	0.169154	3.46438e-07	4.03127e-06	0.0197606	1.04616e-66	TRUE
Ruminococcus sp. CAG:579	0.025011	6.92463e-08	8.01297e-07	0.114428	7.6674e-08	5.27846e-07	0.903127	2.09271e-20	TRUE
Ruminococcus sp. CAG:60 / Blautia sp. 2789STDY5608836	0.466433	9.25271e-08	4.4159e-07	0.514096	8.79208e-08	3.82097e-07	1.05239	0.0774187	FALSE
Ruminococcus sp. CAG:624	0.0140412	8.19826e-09	1.57938e-07	0.0165837	5.84256e-09	6.15848e-08	1.4032	0.819796	FALSE
Ruminococcus sp. CAG:724	0.0157964	2.11316e-08	3.37025e-07	0.363184	2.8304e-07	1.13666e-06	0.0746594	8.84572e-154	TRUE
Ruminococcus sp. JC304	0.341378	5.53922e-08	2.72496e-07	0.507463	1.13113e-07	3.45496e-07	0.489708	2.15619e-14	TRUE
Ruminococcus sp. Marseille-P328 / Blautia sp. 2789STDY5608844 & sp. 2789STDY5608844	0.939886	5.73474e-07	1.00729e-06	0.913765	2.11877e-07	3.88396e-07	2.70663	2.97607e-28	TRUE
Ruminococcus sp. UNK.MGS-30	0.197016	1.94006e-07	7.91426e-07	0.228856	8.11897e-08	4.07278e-07	2.38954	0.429044	FALSE
Ruminococcus torques	0.824484	7.46538e-07	1.89054e-06	0.237148	8.88473e-08	5.50455e-07	8.40249	1.01962e-140	TRUE
Ruthenibacterium lactatiformans	0.939008	3.96459e-07	1.22675e-06	0.495854	7.6016e-08	5.71152e-07	5.21546	2.01078e-149	TRUE
Sanguibacteroides justesenii == Gabonibacter massiliensis	0.070645	5.33232e-09	3.13401e-08	0.0315091	1.735e-09	1.34932e-08	3.07337	0.000384136	TRUE
Selenomonas artemidis	0.00175516	1.01303e-11	2.97027e-10	0.00165837	0	0	inf	0.408276	FALSE
Selenomonas bovis	0.00131637	5.71152e-10	2.01112e-08	0.0845771	1.58681e-07	7.22056e-07	0.00359938	1.24845e-40	TRUE
Sellimonas intestinalis == Drancourtella massiliensis	0.233875	5.0806e-08	2.79102e-07	0.0315091	5.2778e-09	9.77137e-08	9.62637	9.31337e-29	TRUE
Senegalimassilia anaerobia	0.232997	6.102e-08	2.74183e-07	0.814262	3.44993e-07	9.13492e-07	0.176873	1.67653e-156	TRUE
Slackia exigua	0.00921457	1.77378e-10	2.67199e-09	0.00165837	0	0	inf	0.0282931	TRUE
Slackia piriformis	0.0574814	9.27036e-09	9.93752e-08	0.0066335	6.44662e-10	1.06592e-08	14.3802	1.18956e-07	TRUE
Solobacterium moorei	0.201404	6.46293e-09	5.83765e-08	0.126036	1.32969e-08	1.87098e-07	0.486046	0.00010672	TRUE
Sphaerochaeta sp. Phil3	0.000877578	1.64153e-09	7.83648e-08	0.0895522	1.5331e-07	1.1793e-06	0.0107073	2.71863e-44	TRUE
Streptococcus anginosus	0.136902	1.89577e-08	1.96442e-07	0.157546	1.5939e-08	9.22601e-08	1.18939	0.253377	FALSE
Streptococcus australis	0.286529	2.61076e-08	2.12192e-07	0.257048	1.90968e-08	1.56523e-07	1.36712	0.25333	FALSE
Streptococcus gordonii	0.186485	1.66122e-08	1.40817e-07	0.230514	1.99271e-08	1.87297e-07	0.833649	0.02296	TRUE
Streptococcus infantarius	0.0280825	4.33304e-09	6.75409e-08	0.358209	3.4262e-07	2.15317e-06	0.0126468	1.99363e-132	TRUE
Streptococcus infantis	0.116718	9.71987e-09	8.83e-08	0.0613599	3.17038e-09	2.02156e-08	3.06584	9.02465e-05	TRUE
Streptococcus lutetiensis	0.0179903	4.08826e-08	8.85671e-07	0.174129	2.38054e-07	2.4612e-06	0.171737	2.17349e-53	TRUE
Streptococcus mitis	0.278192	2.97081e-08	2.21876e-07	0.195688	1.16502e-08	5.52157e-08	2.55	1.40765e-05	TRUE
Streptococcus mutans	0.114963	1.59924e-08	2.21263e-07	0.0613599	1.92772e-09	1.27699e-08	8.29602	0.000112057	TRUE
Streptococcus oralis	0.339184	2.41852e-08	1.45296e-07	0.320066	1.28358e-08	5.19512e-08	1.8842	0.439593	FALSE
Streptococcus parasanguinis	0.644142	2.01135e-07	1.08474e-06	0.510779	8.07325e-08	3.26174e-07	2.49138	2.09158e-08	TRUE
Streptococcus pasteurianus	0.0491444	3.47455e-08	5.82839e-07	0.0945274	8.239e-07	1.49121e-05	0.042172	5.5745e-05	TRUE
Streptococcus salivarius	0.831066	6.25684e-07	3.24065e-06	0.791045	3.5892e-07	9.81991e-07	1.74324	0.445981	FALSE
Streptococcus salivarius 2	0.0245722	7.08028e-09	1.36958e-07	0.0149254	1.17998e-08	1.62901e-07	0.600033	0.131332	FALSE
Streptococcus sanguinis	0.263712	1.07695e-08	5.95883e-08	0.20398	9.00051e-09	3.73005e-08	1.19654	0.0077314	TRUE
Streptococcus sp. I-P16	0.288284	2.71329e-08	2.58277e-07	0.112769	5.49673e-09	4.96457e-08	4.93619	2.69694e-19	TRUE
Streptococcus sp. UBA632	0.00351031	2.41959e-10	6.20177e-09	0.0713101	2.36048e-08	1.95096e-07	0.0102504	7.81444e-29	TRUE
Streptococcus thermophilus	0.43835	2.50303e-07	1.62182e-06	0.159204	1.1866e-08	8.0462e-08	21.094	4.21714e-39	TRUE
Streptococcus vestibularis	0.268978	3.35603e-08	2.37664e-07	0.182421	3.08974e-08	5.31946e-07	1.08619	9.87422e-06	TRUE
Subdoligranulum sp. CAG:314	0.163668	1.94431e-07	1.00115e-06	0.0199005	1.26537e-08	2.09395e-07	15.3655	2.14387e-20	TRUE
Succinatimonas hippei	0.0215007	3.55665e-09	5.99644e-08	0.00331675	8.45211e-12	2.0755e-10	420.801	0.00157226	TRUE
Succinatimonas sp. CAG:777	0.025011	1.47474e-07	2.98883e-06	0.751244	1.33752e-05	2.96521e-05	0.0110259	0	TRUE
Sutterella parvirubra	0.016674	9.94164e-09	1.36573e-07	0.0149254	2.0454e-09	3.32373e-08	4.8605	0.628617	FALSE
Sutterella sp. CAG:521	0.0390522	3.79359e-08	3.84845e-07	0.0199005	1.08673e-08	1.08422e-07	3.49084	0.0198814	TRUE
Sutterella wadsworthensis 1	0.332602	4.7488e-07	1.68995e-06	0.505804	2.93897e-07	1.15057e-06	1.61581	3.34374e-07	TRUE
Sutterella wadsworthensis 2	0.229925	3.74042e-07	1.7668e-06	0.402985	7.46156e-07	2.73363e-06	0.501293	5.93335e-16	TRUE
Tissierellia bacterium S7-1-4	0.0105309	1.43649e-09	3.67228e-08	0.00497512	1.47041e-10	2.56734e-09	9.7693	0.133696	FALSE
Treponema succinifaciens	0.00175516	5.26634e-09	1.98472e-07	0.197347	1.441e-06	7.85667e-06	0.00365465	2.70468e-98	TRUE
Turicibacter sanguinis 1	0.1957	1.9793e-08	1.4342e-07	0.235489	2.69952e-08	1.40626e-07	0.733204	0.0424265	TRUE
Turicibacter sanguinis 2	0.313295	3.72721e-08	2.47448e-07	0.389718	7.54412e-08	3.14751e-07	0.494055	1.47035e-05	TRUE
Turicimonas muris	0.0372971	5.23977e-09	7.97529e-08	0.00995025	4.59755e-09	1.09858e-07	1.13969	0.000488903	TRUE
Tyzzerella nexilis	0.176393	2.15535e-07	1.93961e-06	0.0729685	1.48678e-08	1.3262e-07	14.4968	8.75092e-11	TRUE
Veillonella atypica	0.30452	9.92339e-08	9.09895e-07	0.298507	3.96175e-08	1.6997e-07	2.5048	0.817373	FALSE
Veillonella dispar	0.427819	1.03902e-07	1.03025e-06	0.432836	5.69588e-08	2.10608e-07	1.82415	0.27976	FALSE
Veillonella magna	0.00263273	1.62762e-10	4.92954e-09	0.00331675	1.03092e-08	2.53154e-07	0.015788	0.81902	FALSE
Veillonella parvula	0.469943	1.96887e-07	2.01314e-06	0.480929	1.35488e-07	7.27415e-07	1.45318	0.331309	FALSE
Veillonella seminalis	0.000438789	0	0	0.00331675	1.33098e-07	3.26837e-06	0	0.066625	FALSE
Veillonella sp. CAG:933	0.00438789	7.11378e-08	1.79789e-06	0.00331675	1.58308e-08	3.88741e-07	4.49365	0.429044	FALSE
Veillonella sp. oral taxon 158	0.373409	4.62605e-08	3.77726e-07	0.354892	4.0313e-08	1.80635e-07	1.14753	0.914646	FALSE
Veillonella tobetsuensis	0.103554	1.17045e-08	1.72533e-07	0.170813	1.49282e-08	7.24174e-08	0.784057	3.825e-06	TRUE
Verrucomicrobia bacterium CAG:312_58_20	0.0188679	6.66156e-09	1.6713e-07	0.00995025	8.66263e-11	1.07355e-09	76.9	0.0963401	FALSE
Weissella cibaria	0.0359807	1.04785e-09	8.79121e-09	0.121061	2.88307e-08	5.65671e-07	0.0363451	6.31353e-16	TRUE
Weissella confusa	0.0552874	3.81344e-09	4.26601e-08	0.406302	1.56767e-07	1.86084e-06	0.0243255	3.37342e-118	TRUE
[Clostridium] hiranonis	0.00658183	2.77542e-09	7.00606e-08	0.00165837	0	0	inf	0.0682624	FALSE
[Staphylococcus] sp. CAG:324	0.136025	1.89823e-07	1.27466e-06	0.00331675	3.19615e-11	7.84847e-10	5939.13	1.13062e-20	TRUE
bacterium LF-3 / Coprobacillus sp. CAG:235	0.747258	5.89549e-07	1.23956e-06	0.519071	1.38961e-07	4.54317e-07	4.24254	3.81104e-52	TRUE
bacterium OL-1	0.0666959	2.25029e-08	2.26384e-07	0.0779436	9.67324e-08	1.51807e-06	0.232631	0.408276	FALSE
butyrate-producing bacterium SS3/4 - Clostridium sp. CAG:81	0.810443	3.30558e-07	5.97618e-07	0.887231	2.39393e-07	3.81334e-07	1.38082	0.235012	FALSE

## Sheet: README
Supplemental Table S3. Comparison of species relative abundance between western and non-western groups.
