# Supplementary material for: Global compositional and functional states of the human gut microbiome in health and disease
Source: Genome Res. 2024 Jun;34(6):967–78. doi: 10.1101/gr.278637.123 (PMC11293553; doi:10.1101/gr.278637.123)
Supplement: Supplement 4 [file Supplemental_Table_S4.xlsx]

## Sheet: Table S4
Supplemental Table S4. Substrate information of CAZyme families commonly existed in human gut microbiome (Figure 1F).
CAZyme family	description	substrate
GH18	lysozyme; endo-b-N-acetylglucosaminidase	N-glycan
GT8	lipopolysaccharide a-1,3-galactosyltransferase	lipopolysaccharide
GH23	lysozyme type G; peptidoglycan lyase	N-glycan
GH13_9	a-1,4-glucan branching enzyme	Glucan, starch
GH73	lysozyme; mannosyl-glycoprotein endo-b-N-acetylglucosaminidase	N-glycan
GT4	sucrose synthase	fructose, NDP-glucose
CBM32	Binding to galactose and lactose	-
GH1	b-glucosidase	cellulose
GT32	a-1,6-mannosyltransferase	GDP-mannose
GH88	d-4,5-unsaturated b-glucuronyl hydrolase	glucuronate derivatives
GH105	unsaturated rhamnogalacturonyl hydrolase	rhamnopyranose derivatives
GH31	a-glucosidase	starch, sucrose, maltose
GH36	a-galactosidase	galacto-saccharides
GH13	a-amylase	starch
GH28	polygalacturonase	pectic acid
GH16	b-porphyranase	porphyran
DOC	-	-
CBM72	associated with endoglucanase	-
