# Supplementary material for: Global compositional and functional states of the human gut microbiome in health and disease
Source: Genome Res. 2024 Jun;34(6):967–78. doi: 10.1101/gr.278637.123 (PMC11293553; doi:10.1101/gr.278637.123)
Supplement: Supplement 5 [file Supplemental_Table_S5.xlsx]

## Sheet: Table S5
category		Adenoma	Adenoma	Adenoma	Adenoma	Cancer	Cancer	Cancer	Cancer	Cancer	Cancer	Cancer	Cancer	Cancer	Cancer	Cancer	Hyperglycaemia	Hyperglycaemia	Hyperglycaemia	Hyperglycaemia	Hyperglycaemia	Hyperglycaemia	IBD	IBD	IBD	Inflammatory	Inflammatory	Inflammatory	Inflammatory	Liver	Liver	Liver	Liver	Liver	Obesity-CVD	Obesity-CVD	Obesity-CVD	Others	Others	Others
cohort		adenoma:AUT:PRJEB7774	adenoma:FRA:PRJEB6070	adenoma:ITA:PRJNA447983	adenoma:JPN:PRJDB4176	CRC:AUT:PRJEB7774	CRC:CHN:PRJEB10878	CRC:FRA:PRJEB6070	CRC:GER:PRJEB27928	CRC:GER:PRJEB6070	CRC:ITA:PRJNA447983	CRC:JPN:PRJDB4176	CRC:USA:PRJEB12449	NSCLC:FRA:PRJEB22863	RCC:FRA:PRJEB22863	melanoma:USA:PRJNA397906	GDM:CHN:PRJEB18755	IGT:SWE:PRJEB1786	T1D:LUX:PRJNA289586	T2D:CHN:PRJNA422434	T2D:ESP:PRJNA361402	T2D:SWE:PRJEB1786	CD:CHN:PRJEB15371	CD:ESP:PRJEB2054	UC:ESP:PRJEB2054	BD:CHN:PRJNA431482	RA:CHN:PRJEB6997	SPA:CHN:PRJNA375935	VKH:CHN:PRJNA356225	LC:CHN:PRJEB6337	LC:GBR:PRJEB38481	NAFLD:ESP:PRJEB14215	NAFLD:ITA:PRJEB14215	NAFLD:USA:PRJNA373901	ACVD:CHN:PRJEB21528	atherosclerosis:SWE:PRJNA177201	ob:DNK:PRJEB4336	ME/CFS:USA:PRJNA379741	PD:GER:PRJEB17784	acute diarrhea:USA:PRJNA321753
	msp
Effect_size	msp_0001	-0.0721655	0.0426734			0.128158	-0.0336039	-0.0730231	0.134554	-0.07765		-0.0199148	-0.0179165	0.0601413	0				0.102207	-0.041388	-0.0843196				0	0.0462356	-0.00447612	-0.0221592	0.0121244	-0.0352636		-0.0700502		0.0635354	-0.0380579		-0.0476925		0.175594
Effect_size	msp_0002	0.0199146				0.0214869				-0.229907		-0.0130441						0.0157546		-0.0223397		-0.046016					-0.000975494	-0.000987138	0.00764658		0.0137887			0.0284724			-0.0756314	0.0584544	-0.0853503
Effect_size	msp_0003	0.108969	0.111575	-0.0105401	0.06397	0.134015	0.0302613	0.0528992	-0.0507423	0.0647467	0.00984267	0.12424	0.127643	0.0491208	0.117237	-0.0440281	-0.0229615	-0.208766	-0.0993679	0.0341924	-0.13257	-0.368747	-0.143399	-0.18006	-0.353953	-0.0743446	-0.129226	-0.115762	-0.0730304	-0.095033	-0.194254	-0.204531	-0.107227	-0.127711	-0.0368171	-0.274919	-0.0414843	0.0627717	0.18792	-0.0303062
Effect_size	msp_0004		0.0334793	-0.0350297				0		0.0772239				-0.00660553				-0.0458488			-0.155995	0.0933164			-0.0326077				0.0522436		-0.0365556			0.0418895			-0.0924137
Effect_size	msp_0005	-0.0161611	-0.0126973	0.240862	0.0300698	0.248416	0.0686545	0.0828073	-0.00698058	0.230182	0.310801	0.0398919	0.203512	0.0994243	0.0725011	0.222316	-0.0809722	-0.195582	0.227884	0.116243	0.217813	-0.167128	0.23643	0.451848	0.352934	-0.00568273	0.0349479	-0.062404	0.0454742	0.0105127	-0.0404053	0.302013	-0.0577696	1	0.22099	0.135515	0.0760969	0.143616	0.0472558	0.156023
Effect_size	msp_0006	-0.0306279	0.0221688	0.0367811				-0.281941		-0.0807811	-0.0120386		-0.0346712	-0.286413	-0.213452	-0.0227057		-0.136693		0.0908997		-0.156013											-0.0299483				-0.15528	0.0367609	0.0693639
Effect_size	msp_0007	-0.0267475	-0.173605	-0.0966724	0.0275045	0.293318	-0.0456208	-0.0436383	-0.148924	-0.114894	-0.203422	0.0368686	-0.181736	-0.0701213	0.100487	-0.101384	0.0301197	0.0147949	-0.0562312	0.000758762	0.123579	0.0760008	-0.0579033	0.226567	0.203859	-0.0279621	-0.0279955	0.0176151	-0.0216385	0.0557145	0.0230897	0.0976809	0.126966	-0.031529	-0.0438625	-0.222289	0.0684118	0.0496552	-0.116353	-0.0259792
Effect_size	msp_0008	0.0405244	-0.105722	0.0646896	-0.000494941	0.110483	-0.0479848	-0.0524126	0.0184626	-0.0192855	-0.0900152	-0.0343864	-0.108788	-0.121132	0.00446034	0.130116	0.0231533	-0.0713591	0.0587796	0.0126235	0.0659028	-0.238156	-0.195005		-0.0326077	-0.0353206	-0.0834877	-0.0473128	-0.0474163	-0.132139	-0.143918	0.086047	0.0288635	0.0173922	-0.0399104	0	-0.134727	0.247107	-0.0451808	-0.0368158
Effect_size	msp_0009	0.00244525	0.029764	-0.0277399	0.0216257	0.0890284	0.152727	0.147922	0.0755209	0.303939	0.0566112	0.00385799	0.303067	0.474055	0.308537	0.299859	-0.0105512	0.353452	-0.0727334	0.202124	-0.0649477	0.259529	0.153022	0.667014	0.129122	-0.0705841	-0.0480361	-0.107423	-0.129691	0.0586017	0.374602	0.0635559	-0.0509864	0.260686	1	0.091081	0.10115	0.281189	0.0703048	0.0443595
Effect_size	msp_0010	0.0425998	0.0298211	0.177806	0.033054	0.233741	0.0802606	0.101619	0.2294	0.23119	0.219203	0.0471554	0.205664	0.0215253	0.00024693	-0.100867	-0.070852	0.127794	-0.0490746	0.0869092	0.081352	-0.0112731	0.0266941		0.499165	0.0494054	-0.048727	-0.00756171	0.00602255	0.221376	0.120703	0.167844	0.143659	-0.105144	0.124931	-0.0664945	0.088538	0.127944	-0.0257648
Effect_size	msp_0011	-0.0591479	0.0875085	0.0568415	-0.0029007	0.0701154	-0.00607206	0.183043	0.03982	0.103355	0.115042	0.0635467	-0.0170679	0.165434	0.189636	-0.0469206	-0.046868	-0.157494	-0.151121	0.117137	-0.0610483	-0.125939	0.0490415	0.492925	0.118918	-0.00606505	-0.123771	-0.0449753	-0.0334383	0.143972	0.0485742	-0.0509751	0.246056	-0.0520394	-0.00680906	-0.18293	-0.0060279	0.00293344	-0.0430664	0.0456789
Effect_size	msp_0012	-0.0925032	-0.0754251	-0.217098	0.112263	0.257592	0.0153252	0.0806413	-0.024876	0.0765784	0.0205431	0.0639635	0.106082	0.337096	0.364891	-0.02746	0.0389387	-0.039612	0.0295886	0.21541	0.171518	-0.172998	0.0576282	0.226567	-0.237925	0.0525696	-0.0303819	-0.0424115	0.107276	0.044236	-0.00510313	0.142764	0.117443	-0.104526	-0.0868724	-0.275892	0.0681451	-0.052736	0.132188	-0.0911701
Effect_size	msp_0013	-0.156809	-0.123321	-0.263031	-0.113855	0.0193225	-0.0810009	-0.0629871	-0.160959	-0.170254	-0.0642879	-0.114892	-0.0117528	-0.0595922	0.0286797	-0.132985	0.0249485	-0.0152498	0.0923119	-0.0951176	-0.299725	0.0126141	-0.270466		-0.387366	-0.0752311	0.0816977	-0.0201865	-0.0607076	-0.0904339	-0.191457	-0.227723	-0.0132966	-0.0630195	-0.0328952	-0.312283	0.0483023	-0.0695374	0.0150645
Effect_size	msp_0014	0.119611	0.0502719	0.039216	0.0376874	0.231342	0.151637	0.143635	0.218517	0.294859	0.140271	0.0775721	0.263143	0.289395	0.21511	0.284281	-0.0593882	0.0953543	-0.028129	0.123274	-0.140601	0.0438846	-0.0244687	-0.255883	-0.204553	-0.0432216	0.146546	-0.134441	-0.130769	-0.0773396	0.0158566	-0.113164	-0.0916338	0.0738825	0.179273	0.0596191	0.0507046	0.191985	0.207191	-0.00668021
Effect_size	msp_0015	-0.015048	0.0209334	-0.234642	0.0124711	-0.0467803	-0.0873788	-0.0959921	-0.0753126	-0.205416	-0.132256	-0.145579	0.0302416	-0.128011	-0.0842846	-0.123324	0.0277138	0.00180083	-0.448677	-0.168579	-0.022137	-0.0226761	-1	-0.433963	0	-0.101591	0.0193638	-0.0307154	-0.118909	-0.239039	-0.13813	0.0559382	0.224822	-0.0034477	-0.154063	0.164889	0.0752853	0.00783402	-0.290144
Effect_size	msp_0016	0.0685698	0.14451	-0.0481417	-0.040812	0.206765	-0.138095	0.0196132	-0.130955	0.0625745	-0.0492115	0.17739	0.0241908	-0.147175	-0.0891011	0.129308	0.00551117	-0.239898	-0.152425	-0.154257	-0.219797	0.0299217	-0.119448	-0.162835	-0.316127	0.126539	-0.107389	0.212941	0.153272	0.103137	-0.116225	-0.0212691	0.32518	0.0122746	-0.0761876	-0.00249754	0.00410015	0.0903241	-0.0812947
Effect_size	msp_0017	-0.0622566	-0.040188	-0.203978	0.00679833	-0.100167	-0.145222	-0.178572	-0.316917	-0.300141	-0.0864144	-0.125849	0.0896311	0.0103819	-0.170313	0.0219012	-0.0343286	-0.0219667	-0.246624	-0.260862	0.0977717	-0.0629449	-0.275758	-0.0215166	-0.153472	-0.0665175	0.120141	0.0206173	-0.0268815	-0.121282	-0.028491	0.0626939	0.218258	0.0141371	-0.18093	-0.133865	0.103388	-0.0168234	-0.229978
Effect_size	msp_0018	0.122628	0.0823282	0.0701407	-0.0517386	0.160724	0.187412	0.051799	0.122836	0.180205	0.0017898	-0.00305384	0.264092	0.198399	0.237691	0.25537	0.0311146	0.17454	0.0178066	0.0957418	-0.167224	0.0554565	0.00463043	-0.09759	-0.0398672	-0.0269021	0.0585539	-0.133476	-0.0847605	-0.0817367	-0.0413034	-0.151108	-0.158757	0.0418261	0.260972	0.119983	0.0717014	0.279153	-0.00358851
Effect_size	msp_0019	-0.0848064	-0.0450972	-0.141288	0.0344432	0.19609	-0.0692907	0.0368985	-0.101079	0.0303732	-0.0909517	0.00875084	-0.00995058	-0.0728999	0.0236085	0.0417281	0.0228065	-0.114543	0.110515	-0.0151426	0.192081	-0.159286	-0.0513454	0.434099	0.0546541	0.0320642	0.03402	0.00974887	0.0659943	-0.0362619	-0.119366	0.19795	-0.0121191	-0.0533036	-0.0317763	-0.0722214	-0.00617898	0.251864	0.0258669	-0.0248971
Effect_size	msp_0020	0.002355	0.0401401	0.00962834	-0.00122039	0.0819978	0.13377	0.157645	0.160424	0.219319	-0.00451416	-0.0871827	0.293768	0.444643	0.239151	0.318569	0.00529061	0.384346	0.0178066	0.139416	-0.0504878	0.335969	0.207031	0.756323	0.0819811	-0.0145759	-0.0150344	-0.0983685	-0.0916956	0.0364019	0.328037	0.0856128	-0.0839192	0.285563	0.136587	0.270752	-0.00739332	0.234507	0	0.0748721
Effect_size	msp_0021	-0.198696	-0.0419409	-0.210615	-0.00651863	0.227446	-0.0684964	-0.0571948	0.215739	0.11308	-0.0815292	-0.0322755	-0.0800039	-0.0179332	-0.0630888	-0.130977	-0.0355133	-0.121678	-0.316013	0.0518222	0.0408734	-0.177289	-0.0862202	-0.607548	-0.387366	-0.0579781	-0.07795	-0.127068	-0.067682	-0.0395091	-0.139067	0.0394214	0.139932	-0.0281165	-0.0663245	-0.0279819	-0.0395429	-0.00456625	0.0858122	-0.0407427
Effect_size	msp_0022	0.10109	0.128787	0.0387738	0.0376251	-0.0519	-0.1122	0.0565182	-0.0016282	0.0386428	0.0246525	0.0972238	0.0286453	0.0627441	0.109022	0.0144396	0.00351691	-0.0260914	-0.149153	-0.111649	0.259419	0.0437647	-0.10874	0	0.0893077	0.085342	0.0270889	-0.0290679	0.074942	-0.0161549	-0.0822712	0.199398	0.262587	0.0729549	-0.124843	-0.0585143	-0.0642444	0.100998	0.109	-0.0394679
Effect_size	msp_0023	0.0497872	0.0733475	-0.100774	0.0914594	0.240578	0.0785654	-0.0309124	0.0531415	-0.0474082	0.0440577	0.104155	0.0171663	0.0882216	0.211664	-0.0776545	-0.00286546	-0.0315582	-0.0906379	0.0531474	0.0614343	-0.152698	-0.0615171	-0.225075	0.060257	0.0159012	0.0566981	0.0099465	0.0614059	0.0964954	-0.229048	0.134458	0.228074	-0.10836	-0.0197981	-0.210959	-0.0395322	0.0345791	0.0707189	-0.0348244
Effect_size	msp_0024	-0.00175932	0.109902	-0.0165787	-0.0103435	0.235351	0.178309	0.216624	0.205928	0.260364	0.141539	0.0493296	0.27009	0.366245	0.255094	0.286158	0.00565899	0.188329	0.033145	0.15446	-0.138845	0.143044	0.0981087	0.535028	-0.156288	-0.0597949	-0.0330763	-0.0420968	-0.126062	0.169323	0.337211	-0.0574314	-0.159671	0.130299	1	0.134173	-0.0276409	0.220981	0.103306	0.00402988
Effect_size	msp_0025	0.011748	0.117067	-0.314722	0.034156	0.154104	0.226182	0.116155	0.116128	0.110175	0	0.0189178	0.028203	-0.0350922	0.0193592	0.0696065	0.0268455	-0.20635	0.116008	0.00787197	-0.387568	-0.0669485	-0.0856679		-0.553619	0.0354821	0.0675001	-0.0956312	0.0152048	0.011266	-0.251723	-0.279514	-0.117557	0.0376721	0.145716	0.0869848	-0.046333	0.18916	0.433273	-0.0624893
Effect_size	msp_0026	0.17096	-0.0777258	-0.098991	0.101404	0.165885	-0.0784744	-0.028215	-0.0810877	-0.0430594	0.0842042	0.0707424	0.10763	-0.023465	0.029687	0.0630031	0.0760157	-0.0858312	-0.234716	-0.0691628	0.214286	-0.00964712	-0.101969		0.299004	0.146198	-0.0006616	0.0327827	0.173807	0.0244696	-0.079762	0.150832	0.0706052	-0.00536947	-0.129029	0.0532181	-0.0873917	0.0746735	-0.0981554
Effect_size	msp_0027	-0.0356004	0.103284	0.0189035	0.0101796	0.336289	-0.0856395	0.199132	-0.146055	0.0521364	-0.0194279	0.070428	-0.060001	0.169346	0.299056	-0.0693104	0.084655	-0.149751	0.0861698	-0.0248461	0.00927358	-0.214002	-0.187231	-0.23868	0.13642	0.0159635	0.059101	0.0828236	0.109368	-0.026048	-0.0425052	0.0159036	0.0780151	-0.216638	-0.151857	-0.0474562	0.00410697	-0.0809311	0.00936611	-0.0741602
Effect_size	msp_0028	0.145831	-0.167735	-0.0669384	0.076411	0.0258575	0.0486147	-0.182277	0.116327	0.0726424	0.00246112	0.118042	0.126655	-0.0896436	-0.107744	0.1445	0.0848472	-0.0780972	-0.0816266	0.0559777	-0.157441	-0.131333	-0.110413		-0.523613	-0.00412625	-0.0913929	-0.117135	-0.0108423	-0.0979721	-0.169941	-0.250467	0.0146812	-0.042618	0.0276798	0.0610187	-0.0288743	0.0444612	-0.0323133
Effect_size	msp_0029	0.0683842	-0.114276	-0.439759	-0.080891	0.133584	-0.113189	-0.243718	-0.179794	-0.127937	-0.165346	-0.104529	0.0363899	-0.256316	-0.0261993	-0.111022	0.0101449	-0.200275	0.00591772	-0.13389	-0.195668	-0.063951	-1	-0.0215166	0.271812	-0.109831	-0.0623266	-0.069369	-0.237383	0.00643694	0.0312211	-0.217035	-0.0890981	-0.118406	-0.182598	-0.251363	-0.0868069	-0.0597832	-0.0585776
Effect_size	msp_0030	0.0104468	-0.104677	0.0726693	0.114601	0.139554	0.0274095	0.0319791	-0.175187	-0.123608	0.0939982	0.0921763	0.0445185	0.0050702	0.110791	0.224051	-0.0568842	-0.241269		0.0170603		-0.0974323	0.0215579			-0.00614537	-0.056318	-0.216669	0.0195568	0.115781	0.222965		-0.0396718	0.126523	0.150182	0.0124877	-0.157915	0.156113	-0.126883	0.148515
Effect_size	msp_0031	0.0215073	0.236629	0.0591416	0.0469024	0.214171	-0.100965	0.130892	-0.0552362	0.0962059	0.0646305	0.00407968	-0.0986457	-0.0337373	0.0325641	0.0381831	-0.0708757	-0.0336139	-0.0625089	0.0477878	0.153352	-0.101469	-0.157535	0.535028	0.0209445	0.0586163	0.0267105	0.105787	0.119636	-0.0141517	-0.140148	0.350536	0.343724	0.0975025	-0.0805698	0.170636	-0.0247291	0.050297	-0.0749607	-0.037198
Effect_size	msp_0032	0.113754	-0.0120696	-0.0109451	-0.0489383	0.352364	-0.0111632	0.172052	0.140096	-0.005547	0.0190687	0.0571718	0.00852469	-0.00549179	0.288596	-0.048766	0.0146974	-0.185533	0.325489	-0.0650721	0.182747	-0.155161	-0.163393	-0.0215166	-0.315928	0.0840111	0.078986	-0.0165691	0.0752021	-0.0300579	-0.225154	0.092966	-0.121901	-0.282227	-0.0573526	-0.422835	0.0441202	0.0542163	0.183681	-0.068938
Effect_size	msp_0033		0.132903	-0.0656806	-0.0706135	0.148399	0.0576026	0.187703	-0.0006497	0.0438079	0.0232404	-0.0502128	0.0690005	0.1857	0.144738		0.0037893	0.013654		-0.0152104			0.101587			-0.0221582	-0.0475263	0.00336733	-0.000153779	0.147036	-0.0735662		-0.0655012	0.221113	0.151216	0.16294	0.0779324		-0.0987718
Effect_size	msp_0034	-0.13769	-0.0345265	-0.00660399	-0.000203598	-0.0492219	-0.0913584	-0.190844	-0.206034	-0.25087	-0.152432	-0.0378105	-0.0174503	-0.49328	-0.109143	-0.161904	0.0505735	-0.331711	-0.0103926	-0.162035	-0.0979864	-0.189502	-0.207015		0.0344326	0.0765349	0.183762	-0.0114094	0.0365242	-0.21036	-0.410992	-0.250772	-0.0634983	-0.237842	-0.151734	0.0836061	-0.0946855	-0.0440444	-0.0288072
Effect_size	msp_0035	0.188827	0.135651	-0.0791196	0.029082	0.136844	-0.0273477	0.0938034	0.0676496	-0.0126901	-0.158769	-0.045329	-0.0986704	0.0977612	0.116758	-0.0132429	0.0149763	-0.220517	-0.162849	0.0777699	0.0665367	-0.282349	-0.0543496	0.537914	0.0430407	0.0256589	-0.0913331	0.172479	-0.0487225	0.078401	-0.0044035	-0.0624082	-0.136784	-0.236068	-0.0355744	-0.248158	-0.0556528	0.149891	-0.0211374	-0.0241945
Effect_size	msp_0036	0.0104138	0.10333	-0.113024	0.054152	0.301912	0.0222235	0.0358328	0.0592716	-0.00931631	0.0313699	0.0128058	0.0462565	-0.150355	0.00138724	-0.00501053	-0.0259854	-0.254965	0.21003	-0.101406	-0.125635	-0.0923566	-0.132641	-0.225075	0.0347152	0.120828	-0.0572682	-0.0678315	-0.0238274	-0.0620654	-0.207983	-0.0909069	0.0891624	-0.131777	-0.0974066	0.235083	-0.0348555	0.329301	-0.0974543
Effect_size	msp_0037	0.0254534	0.0334568	-0.104477	0.0661314	0.228568	-0.0187794	0.064758	-0.0637098	-0.00408377	0.133794	0.020175	0.123376	0.0554543	0.0337178	-0.0448908	0.0729965	-0.0271332	0.102207	0.022905	0.0609245	-0.196554	-0.128302		-0.156288	0.003359	-0.0108851	-0.0692492	0.0289193	9.77243e-05	-0.134772	-0.00497601	0.195059	-0.0683819	-0.0446298	-0.0394623	-0.0196357	0.288269	-0.0562408
Effect_size	msp_0038	0.077572	0.0397014	-0.112145	0.0299276	0.0923398	-0.0138922	0.0177477	-0.0576755	-0.000683267	0.197573	-0.0109563	0.180929	-0.165041	0.239173	-0.0971589	0.00624144	-0.183419	0.190314	-0.0011275	-0.0756304	-0.123983	-0.0635686		-0.357231	0.0226513	-0.0580464	-0.0225321	0.00458249	-0.109476		-0.200094	0.071373	-0.15426	-0.111448	0.12719	-0.0979451	0.00855222	0.039981
Effect_size	msp_0039	0.071799	0.16436	-0.0614572	0.00165675	0.0259262	-0.138827	-0.0790207	-0.199346	0.0784026	0.0446489	-0.0136508	-0.0864479	-0.254379	-0.109769	-0.181914	0.0772011	-0.164144	0.0762336	-0.159877	-0.013633	-0.115429	-0.210457		-0.111574	-0.0870392	-0.0110086	-0.0972323	-0.023787	-0.0329404	-0.17411	-0.167061	0.0888414	-0.0783979	-0.133888	0.199726	-0.0877407	0.0570268	0.101898
Effect_size	msp_0040	0.130558	0.107606	-0.0907047	-0.0107098	0.313687	-0.141766	-0.0134791	-0.25097	-0.160265	0.0561337	0.0405374	0.0357948	-0.10927	0.023081	0.0637131	-0.00552853	-0.0458876	-0.0718852	-0.0708544	-0.333035	-0.0125822	-0.220572	-0.365782	-0.694304	0.0470247	-0.0642167	0.0867742	0.0512529	0.0319713	-0.108593	-0.139153	0.223447	0.033589	-0.110766	0.0522623	-0.131529	0.163552	-0.0198773	-0.0277053
Effect_size	msp_0041	0.132363	0.201416	0.143434	0.0279868	0.65121	-0.0813902	0.00265024	-0.332267	-0.0873266	0.111175	0.0683524	-0.0437933	-0.273802	-0.133876	-0.0707446	0.0332671	-0.172243	-0.0152225	-0.0811101	-0.213337	0.11332	-0.156703		0	0.122876	-0.0611366	0.134925	0.264415	0.179336	0.044952	0.0543371	0.315409	0.0594266	-0.219605	0.295451	0.00638892	0.120364	-0.14563
Effect_size	msp_0042	0.160432	-0.0871777	-0.0639923	-0.0189168	0.0536338	-0.0193686	-0.11501	-0.041335	-0.0305179	0.151055	0.00435035	-0.0117602	-0.539654	-0.179255	-0.101492	0.0258173	-0.156941	-0.192241	-0.15708	-0.168582	-0.154279	-0.150204		-0.502668	0.0189547	0.0857302	-0.0530694	-0.0200408	-0.112987	-0.230294	-0.220624	0.0392272	0.0420318	-0.127772	0.0119494	-0.0693605	-0.036544	-0.113917
Effect_size	msp_0043	0.0887052	0.129536	-0.104647	-0.00133575	0.0155069	-0.0529483	0.0750321	-0.0818622	0.0661758	-0.120632	0.0689308	0.0885547	-0.100887	0.112351	0.0688906	0.046993	0.0284562	0.100833	-0.181397	-0.187562	0.0114393	-0.187324	-0.116311	0.0181514	0.0989771	-0.0595985	0.161859	0.213783	0.0748883	-0.0510895	0.0556991	0.298919	0.1289	-0.0967861		-0.0582224	0.0749276	0.0297076
Effect_size	msp_0044	0.0766966	-0.0797375	0.0350725	-0.0718816	0.271322	0.263961	0.16621	0.216584	0.326443	0.0611467	0.0655269	0.363606	0.215147	0.275408	0.266803	-0.0320132	0.1191	0.315941	0.0957571	0.0994303	0.0348685	0.0162548	0.33976	0.318938	-0.0486649	0.0687357	-0.0544317	-0.0704639	0.0586968	0.0516798	0.146648	-0.0635595	0.0304712	0.219845	0.00700623	-0.00951218	0.0833648	0.117979	-0.0292759
Effect_size	msp_0045	0.010373	-0.315757	-0.301344	-0.0629491	0.0884448	0.0545768	-0.254045	0.00632448	0.0591641	-0.0529756	-0.0205195	0.0350145	-0.4101	-0.408391	0.0743209	-0.0238683	-0.135481	0.0503121	-0.0415951	0.179445	0.00814294	-0.265806	-0.462237	-0.120514	-0.0283658	0.12452	-0.0542533	-0.15045	-0.125386	-0.361397	0.09436	0.115226	-0.0242349	0.118427	-0.0702168	0.166281	0.106482	0.0234153
Effect_size	msp_0046	-0.00403485	0.0373659	0	0.0129215	0.188988	-0.0809295	0.138103	-0.0321592	0.0210724	-0.148114	-0.0360515	-0.112357	0.257501	0.427802	-0.054323	-0.0561727	-0.0975818	-0.0147932	0.0428739	0.0461069	-0.0253763	-0.184602	0.356546	0.0509647	0.0187165	-0.0473129	-0.00375265	-0.0272882	-0.142338	-0.0410658	0.107699	0.0589344	-0.0490525	-0.182408	-0.0589568	0.0106318	0.172471	-0.0414567	-0.106588
Effect_size	msp_0047	0.13596	-0.0718872	-0.18232	-0.0190033	0.00427711	-0.0995419	-0.172448	-0.105228	-0.225564	-0.079965	-0.0273999	-0.012093	-0.365312	-0.117284	-0.132783	0.0316544	-0.113701	0.0724062	-0.160754	-0.0476383	-0.170719		-0.162835	-0.287617	0.0487595	0.104445	-0.0187443	0.0101302	-0.0908545	-0.236253	-0.203571	-0.106935	-0.098954	-0.144899	0.0569985	-0.066937	-0.00163745	0.00852977
Effect_size	msp_0048	0.0318274	0.0384198	-0.120992	0.0468494	-0.0171456	-0.170811	-0.11728	-0.0490537	-0.130214	-0.0520043	-0.063637	0.0777851	-0.128462	-0.062254	-0.0839128	0.0318143	-0.3013	0.112647	-0.141806	0.105899	-0.349816	-0.239352	-0.286147	-0.409647	-0.100325	-0.0206263	-0.06978	-0.12945	-0.0714321	-0.139559	0.0629613	0.122194	-0.0928568	-0.208876	-0.23373	0.0333749	-0.0530138	-0.0489939
Effect_size	msp_0049	0.0495016	0.300747	0.2198	-0.0148684	0.0908306	0.0432553	0.349374	0.214703	0.306444	0.101395	-0.00295664	0.344171	0.28255	0.375943	0.104489	-0.007618	-0.0198281	0.0264325	0.152422	-0.438856	0.0304531	0.0225305		0		-0.0340527	-0.0701283	-0.0361437	0.0207081	0.0476882	-0.223529	-0.0567789	-0.0176804	0.221998	-0.0116066	-0.0336596	0.018152	0.134497
Effect_size	msp_0050	-0.138883	-0.112933	-0.41015	-0.0216078	-0.13017	-0.0739522	-0.276337	-0.160515	-0.112102	-0.0455355	0.0798661	0.0966905	-0.549849	-0.475857	0.104011	0.0553476	0.168542	-0.082848	-0.043831	0.0645662	0.19657	-0.275128	-0.321412	-0.288909	-0.199768	0.0811953	0.0622886	-0.283161	-0.186443	-0.400598	0.0158631	0.17338	0.193021	-0.0514183	0.179438	-0.0400474	-0.0787859	0.0808473
Effect_size	msp_0051														-0.00106727
Effect_size	msp_0052	-0.12133	-0.117188	-0.142969	0.0399894	-0.159339	0.0952611	-0.13795	-0.155835	0.0341264	-0.116024	-0.0229223	0.167769	0.0562112	-0.235095	0.319982	0.00592042	0.440822	-0.111291	0.0349873	-0.118649	0.201407	-0.0372379	0.535028	0.0199336	-0.0751611	0.0427817	0.00275543	-0.118988	-0.0787799	0.0919237	0.0828319	0.148756	0.200889	1	0.132152	0.0482612	0.240748	-0.0282811
Effect_size	msp_0053	0.12444	0.109333	-0.0180109	-0.0114337	0.211423	0.0448206	0.183964	0.112733	-0.113468	0.109211	0.0101751	0.0862113	-0.0198597	0.00515866	0.0459927	0.0678147	-0.174294	0.284681	-0.0397666	-0.0529657	-0.25832	-0.126519		0.086788	-0.0157787	0.0292023	0.0167068	-0.00289079	-0.10976	-0.222091	-0.145988	-0.0175285	-0.171281	0.00809156	0.178158	-0.0445978	0.0933411	0.11636
Effect_size	msp_0054	0.0375506	-0.0601814	0.15686	0.143014	0.262934	0.0400267	0.0594312	0.0819387	0.222094	0.0962758	0.128078	0.141416	-0.109078	0.0933396	0.0884243	-0.00508744	0.0174996	0.0795412	0.0488714	-0.106005	-0.0550819	-0.119018		-0.518273	-0.00684097	-0.0495453	-0.098177	-0.0512491	-0.0525777	-0.208533	-0.250986	-0.0409994	0.0185958	-0.0206151	0.110959	-0.033246	0.000394997	0.0461928
Effect_size	msp_0055	0.0171574	0.102848	-0.110441	0.0268107	0.114205	0.0253413	-0.0143677	-0.107785	-0.0332522	0.0711819	0.0360907	0.0452852	-0.157509	0.0592942	-0.19111	0.0701782	-0.127082	0.258509	-0.121333	0.112662	0.0125833	-0.272949		0.306249	0.00982034	0.0199782	-0.0635305	0.00422698	-0.028601	-0.130796	0.00926458	0.128888	-0.106758	-0.118262	0.0702826	-0.123044	-0.155615	0.116356
Effect_size	msp_0056	-0.160246	-0.0613317	0.0396043	-0.00263363	0.0168817	0.107116	0.178619	0.167057	0.357953	0.0168926	-0.00738881	0.383762	0.42163	0.224341	0.248068	-0.0542472	0.338001	0.00662901	0.149478	0.0108552	0.302785	0.147832	0.787761	0.0209445	-0.081218	-0.0227359	-0.0805318	-0.155011	0.127681	0.374903	0.0639603	-0.125803	0.167727	0.227461	0.211552	0.0677591	0.264579	0.0750503	-0.0508743
Effect_size	msp_0057	-0.05466	0.00240537	-0.146847	-0.0303545	-0.0577991	0.0740279	-0.0736841	-0.110589	0.0762655	0.125221	-0.0346378	-0.0464215	-0.373928	-0.236236	-0.102078	0.049552	-0.102617	0.27705	-0.106302	0.0205832	-0.102597		-0.225075	0.00877577	-0.0646051	0.0276874	-0.0612461	-0.139163	-0.104972	-0.14731	0.0363172	0.208791	-0.0954693	-0.144457	-0.0885241	-0.0311457	-0.00999439	0.0495496
Effect_size	msp_0058	-0.0497193	-0.0163058	-0.0412687	-0.00307707	0.0302968	0.0908766	-0.0139919	0.196116	0.176158	-0.0901845	0.0197704	0.207511	0.129392	-0.243261	0.251367	-0.0241685	0.115283	-0.00599329	0.0765274	0.202484	0.124973	0.189853	0.770395	0.0743828	-0.0840139	-0.0429952	0.0793939	-0.109061	0.226145	0.23729	0.212821	0.106129	0.234182	1	0.0718139	0.132108	0.164445	-0.147412	0.0360471
Effect_size	msp_0059	-0.0988029	0.0199391	-0.139934	0.0108645	0.245084	-0.021866	-0.0148909	-0.0674536	-0.0732416	-0.0691335	0.0387926	0.0808963	-0.0609086	0.354886	-0.100788	0.0388456	-0.215099	0.269267	-0.0507937	-0.0645827	-0.213281	-0.172648	-0.149992	-0.0849731	0.0930013	0.164113	0.132979	0.0909125	-0.0149727	-0.182328	-0.0325667	0.187479	-0.141033	-0.139379	-0.106297	0.000967998	0.0442733	0.0913683	-0.0506856
Effect_size	msp_0060	0.0648282	0.0412902	-0.0139709	0.00189923	0.158325	-0.00171131	-0.029947	-0.102181	0.0101917	0.115347	0.00759523	0.0388593	-0.277116	-0.0704761	-0.112569	0.0549505	-0.304561	0.21003	-0.0685698	0.123274	-0.386862			0.076698	-0.0725352	0.0131352	-0.095825	-0.0600138	-0.154541	-0.263548	0.0126556	0.0579751	-0.174845	-0.172909	-0.162137	-0.10739	-0.160298	0.0420078
Effect_size	msp_0061	-0.0710578	0.136961		0.0629335	-0.0105375	-0.0292589	0.116403	-0.0597973	-0.0268679	0.0466766	0.00758512	0.0632242	0.0455786	0.0481279	0.0303303				0.0138		0.146713	-0.0553275			0.000615239	-0.0637451	-0.0481176	-0.0279475	0.0270957	0.0103814	-0.135236	0.0303619	0.0312129	-0.0601132		-0.0631987	-0.0460892	0.024167
Effect_size	msp_0062	-0.0145835	-0.0507369	-0.187883	0.10393	0.266284	-0.166063	0.035909	-0.00232176	0.0510457	0.226003	0.113665	0.0452371	0.0760589	0.46333	-0.0787957	-0.0216233	-0.323921	0.340764	-0.018655	-0.0682383	-0.288159	-0.147923	-0.364267	-0.237835	0.0205394	0.0330429	-0.0129192	0.136097	-0.0179427	0.000880808	0.0125232	0.378463	-0.315883	-0.147817	-0.164928	-0.0192899	-0.0318442	0.114812	-0.125429
Effect_size	msp_0063	0.0361212	-0.0835217	-0.0376166	0.075467	0.0371383	-0.152782	0.00825781	-0.153655	0.0757485	-0.00610302	0.0276701	0.144534	-0.146546	0.0553683	-0.0304522	0.0850995	-0.00200703	-0.0781582	-0.040034	0.0707309	-0.125265	-0.0575819	-0.130677	0.0199336	0.021027	-0.0768677	0.0153875	0.0411811	-0.0998401	-0.143319	0.0515982	0.0765509	-0.082726	-0.0823525	-0.0675165	-0.0716826	0.118131	0.0845421
Effect_size	msp_0064	-0.153116	0.194593	-0.0379489		-0.0482121	-0.0344182	0.0309521	0.00275504	0.0215958	-0.0554378	-0.0232669	0.119843	-0.0878835	-0.0116111			-0.139054	-0.0661338	-0.0813495		-0.111573	-0.0350505			0.175462	-0.0477957	-0.0461388	0.145927	-0.0189686	-0.0641791		0.0271701	-0.0893697	-0.0217825	0.452464	0.0131569	0.174318	0.0270669
Effect_size	msp_0065	-0.121181	-0.169652	-0.284555	-0.0516317	0.0253295	-0.0454221	-0.155469	-0.118224	-0.106216	-0.186261	-0.0171805	0.071869	-0.325934	-0.243405	-0.056634	-0.0432851	-0.0658622	0.073612	-0.0486577	0.082616	0.0592357	-0.0901253		0.312437	-0.0145489	0.100192	-0.0862078	-0.0423722	-0.0703467	-0.252227	0.0978378	-0.0432614	0.0128486	-0.12677	0.120158	-0.0494166	-0.0473938	-0.00427133
Effect_size	msp_0066	-0.0769964	-0.026242	0.0162661	0.0443294	-0.0595669	-0.0278332	-0.101611	0.00558171	-0.00309522	-0.0713593	0.0528385	0.03326	-0.133958	-0.095947	0.0206533	-0.0120607	0.237924		-0.00251355	0.187942	0.170093	-0.127932	0.28749	-0.163962	-0.0219459	-0.0644809	-0.00737891	-0.0276065	-0.0789541	0.0873447	0.142124	0.163825	0.238542	0.0758717	0.487928	0.170409	0.220985	-0.13484
Effect_size	msp_0067	-0.0217533	-0.0573334	0	-0.0310963	0.08488		0.0371057	0.0302881	0.30267	0.0398179	-0.0243764	-0.0125515	-0.0946059	0.136325	0.227324	0.0150593	0.0748059	-0.148022	-0.0820149	0.0161932	0.0678736	-0.00576856		0.29025	0.0171623	-0.00560381	0.0294205	-0.00862902	0.0287387	0.0517831	0.194515	0.246859		-0.00732991	0.244712	-0.0372267	0.108964	0.182678
Effect_size	msp_0068	-0.0322715	0.110042	-0.28674	0.0593274	-0.0708172	-0.0877305	-0.121687	-0.154864	-0.233058	-0.0985608	0.0168385	0.0890332	-0.400605	-0.191274	-0.0141984	0.00724	0.0590579	0.0917176	-0.221817	0.0977492	0.0727529	-0.284898	-0.407122	-0.458682	-0.0233256	0.112704	-0.0548587	-0.0283691	-0.146714	-0.180064	-0.11104	0.05074	0.211996	-0.0325336	-0.0277524	-0.0282822	-0.137069	-0.170505
Effect_size	msp_0069	-0.014981	-0.0593055	0.0386823	-0.0784208	0.348789	-0.115322	0.0672809	-0.0719432	0.084081	-0.176615	-0.0616601	-0.0744611	0.369811	0.334463	-0.183422	-0.0412041	-0.117023	-0.139056	0.0228037	0.112501	-0.145152	-0.000250089	0.829051	-0.0339765	-0.0294215	-0.0977869	0.0717855	-0.0420218	0.0824262	0.0835779	0.151113	0.220842	-0.19381	-0.131407	-0.223503	0.0647974	0.0312262	-0.0445657	0.0611466
Effect_size	msp_0070	0.0441464	-0.103213	-0.0202349	0.0108809	-0.046835	0.0437774	0.00491737		-0.0755788	-0.0158183	0.0220929	-0.0434075	-0.0135762	0.0271866	-0.0271118	0.00796915	0.093991		-0.0552531		0.00872158	0.18077			0.0254465	0.017707	-0.0533687	0.0544293	-0.0115056	0.0500045		0.0488378	-0.0763243	0.03661		-0.123013	0.134114	-0.164579
Effect_size	msp_0071	-0.0364623	0.0511208	-0.0942955	-0.00483971	0.0844635	0.017719	-0.041305	-0.214792	-0.144404	-0.0247654	-0.0104846	0.0359365	-0.028905	0.123862	-0.0478643	0.0323541	-0.0972199	0.388174	-0.11569	-0.101461	0.0500744	-0.226181		-0.306249	-0.0335576	0.00903177	-0.0731573	-0.0404943	-0.114096	-0.282171	-0.0777404	0.0913373	0.0787704	-0.0886016	-0.166117	-0.0408041	0.041193	0.11613
Effect_size	msp_0072	-0.101463	0.123088	-0.0109094	0.0266543	0.0720033	-0.137153	0.019963	-0.17675	-0.0347461	-0.00231315	0.00205294	-0.00979844	-0.156551	-0.0289996	-0.0558436	-0.0213462	-0.143309	-0.251561	-0.196259	0.00922162	-0.10354	-0.294515		-0.102083	-0.103376	-0.0430053	0.0129273	-0.118322	-0.0296693	-0.00604378	0.055948	0.192449	-0.0501289	-0.114149	-0.206399	0.0641674	-0.0852059	-0.149004	-0.154043
Effect_size	msp_0073	0.0278143	-0.189768	-0.195052	-0.0431815	0.0726068	-0.0625072	-0.000709427	0.000359435	-0.0938411	-0.0392124	-0.0308281	0.161715	0.0759025	0.167604	-0.0608621	0.0129121	-0.149521	0.316301	0.0181486	-0.100116	-0.0932892			-0.325966	0.102103	-0.00134005	0.0559366	0.114404	-0.0905654	-0.0292349	-0.185137	-0.227052	-0.138086	-0.157141	0.0765985	-0.0754699	-0.0399476	0.0933969
Effect_size	msp_0074	-0.061024	0.0447997	-0.156621	-0.0729496	-0.0639776	-0.0385709	-0.275738	-0.0778037	-0.165617	0.0894637	-0.0482523	0.0485876	-0.302316	-0.166873	-0.051586	0.0124109	-0.180322	0.188671	-0.0876434	-0.179232	-0.25786	-0.112318		-0.299004	-0.0378105	-0.0204313	-0.0913176	-0.0813661	0.0577813	-0.142737	-0.226111	0.086805	-0.12775	-0.0368952	-0.0760009	-0.0335643	0.020455	0.0307129
Effect_size	msp_0075	-0.0104315	0.110047	-0.076508	-0.0284432	0.0721802	-0.105963	-0.0895234	-0.175389	-0.148577	-0.0800324	-0.0536737	0.0307846	-0.137822	0.0181518	-0.131885	0.0283908	-0.0777752	-0.115387	-0.167518	-0.0571784	-0.0314651	-1	-0.365782	-0.425346	-0.103498	-0.0125218	0.0231397	-0.0969588	0.0120611	-0.11224	-0.157842	-0.0151265	-0.153416	-0.209747	-0.0366127	0.060975	0.0548574	-0.145629
Effect_size	msp_0076	-0.0409046	-0.170375	-0.483851	-0.0606889	-0.294715	0.055248	-0.37922	-0.0944876	0.0936784	-0.132232	-0.0416738	0.258281	-0.598059	-0.680463	0.321279	0.0221903	0.246287	-0.0680485	-0.0603376	0.230535	0.339346	-0.195077	0.312313	-0.305788	-0.220396	0.119661	0.161285	-1	-0.183856	-0.26809	0.129406	0.0515946	0.272989	0.0556122	0.192861	0.0271039	0.00333947	-0.149762	-0.192521
Effect_size	msp_0077	-0.111334	0.0107351	-0.0941192	0.0219187	-0.120283	-0.12059	-0.118432	-0.134306	-0.12428	-0.0475875	-0.0451102	0.174133	-0.163441	-0.0942758	-0.102301	-0.0183989	-0.283236	0.0627956	-0.126193	-0.0445215	-0.395811			-0.0607516	-0.0408125	0.0615923	-0.122721	-0.0024577	1	-0.13558	-0.109573	0.0340605	-0.131573	-0.0897714	-0.102437	-0.144719	-0.0784841	-0.149543
Effect_size	msp_0078		0.0355083		0.0789689				0.03984		-0.0105559	-0.00274607								0.0416754													-0.0249719	-0.0157033			0.0637084	0.274433
Effect_size	msp_0079	-0.0831498	0.0171744	-0.39052	-0.00706687	0.0712988	-0.0240458	0.0277896	-0.121063	-0.0955033	-0.116757	0.0209444	0.112378	-0.391279	0.0489184	-0.0544369	0.052044	-0.0624853	-0.230791	-0.111768	0.21768	-0.0118698	-0.233628	-0.303774	-0.179051	-0.0827843	-0.0238232	-0.0871237	-0.11707	-0.145097	-0.0726565	0.218782	0.0864084	-0.0618208	-0.0580216	-0.184794	0.0256017	-0.0673087	-0.0868386	-0.133462
Effect_size	msp_0080		-0.0700021	0.00334995	0.0706135		-0.0736047	-0.0131281	-0.0288013	-0.0409455	0.0350133	0.0934451			-0.0981672		-0.0127785			-0.0658325		0.0655728				0.0796335	-0.0868022	0.0882741	0.160942	0.0401434			0.0140955	-0.0929519	-0.0726841		0.0102156	0.152537
Effect_size	msp_0081	-0.0243125	0.188796	0.0831956	0.0122347	0.111935	0.0275633	0.126619	-0.0790255	0.058848	0.0662123	0.0197625	0.134728	-0.165585	-0.104499	0.104595		0.0318898	-0.262949	-0.0613613	-0.0582552	0.0725221	0.0174277		0.0546541	0.0650503		0.0263568	0.0967432	0.196376	0.00653083	-0.0394003	0.0938138	-0.109914	-0.0294652	0.331948	0.0885575	0.15504	-0.188995
Effect_size	msp_0082c
Effect_size	msp_0083	0.0812082	0.0903281	-0.126923	0.0751986	0.0474409	-0.038854	0.0797556	-0.0698716	0.122749	-0.0736473	0.0142711	-0.132016	0.0931899	0.173482	0.0262817	-0.0533446	-0.195644	0.146905	0.0316401	0.0768325	-0.115546	-0.0615475	0.0578799	-0.0607516	-0.0458443	-0.0355671	-0.0106977	-0.0422163	-0.0309162	0.0239127	0.083597	0.184209	-0.0554192	-0.0356366	0.148727	-0.0734019	0.187001	0.0688461
Effect_size	msp_0084	0.122575	0.0307436	0.103772	0.0551186	0.164547	0.021378	0.0209337		0.0263199	0.143748	0.0258267		-0.0737763	-0.174964	0.0460756	0.183341			0.00832015	0.0226705		0.0157851		0.0546541	0.0212545	-0.0653824	-0.0517204	0.210192	-0.00669291	0.041664	-0.0177391	0.0734951	-0.0704579	-0.0143836		0.0508819	0.1638	-0.0551563
Effect_size	msp_0085	-0.0402575	0.134932		-0.0250236	0	0.122928	0.0942099	0.00187656	0.0288783	0.0306367	0.0720992	0.170888	0.109419	0.115511	0.0534524		0.152977		0.0861148			0.0293336				0.146499	-0.0273089		-0.0153091	0.0406745				0.18104		-0.0425342	0.121847	-0.0243273
Effect_size	msp_0086	-0.0728439	0.0244164	0.082522	-0.0179395	0.213405	0.199186	0.328374	0.191558	0.375652	0.243227	0.046399	0.324938	0.337894	0.362798	0.308181	-0.0482274	0.274795	-0.026516	0.159944	0.0171058	0.202204	0.235249	0.536745	0.259137	-0.0662904	-0.0499935	-0.114624	-0.130185	0.184872	0.337226	0.099381	-0.0163055	0.220798	0.264615	0.234213	-0.0831297	0.257601	0.031984	0.0704044
Effect_size	msp_0087	0.108326	0.139465	-0.18963	-0.0127916	0.349761	-0.132226	0.0434297	-0.0431436	0.0234481	0.0456164	-0.0988972	0.0235527	0.0144637	-0.222579	-0.0612285	-0.0322448	0.025655	-0.335827	-0.103885	-0.230158	-0.0316417	-0.252228	-0.623981	-0.517316	-0.0572283	0.0230122	0.0754769	-0.0813131	0.0972666	-0.232477	-0.179396	0.13183	-0.0219572	-0.078079	0.0249773	0.141872	-0.0174715	-0.106927
Effect_size	msp_0088		0.0426734		0.0160647		0.0153419	-0.0750801			0.0335545	-0.0129023	0.195949	-0.0487769	-0.0444275	-0.00876783	0.0959951	-0.0458488		0.11127		0.00500638	-0.0956426			-0.00802661	-0.0431388	-0.10888	0.00454074	-0.0903106			-0.0235449	-0.01798	-0.0136659		-0.101489	0.0578937
Effect_size	msp_0089	0.013408	-0.00875411	0.0230318	-0.0070385	0.308665	0.00306113	0.0630219	-0.0580449	-0.0637132	-0.0924003	0.0369756	-0.0119403	0.185806	0.375687	-0.0684064	-0.0104103	-0.173445	0.110418	-0.0253799	0.109615	-0.10336	-0.122429	-0.108491	-0.38118	0.156016	0.0200529	-0.0414978	0.0399153	-0.0564238	-0.288053	0.0584714	-0.0154356	-0.298888	-0.0101939	0.0506214	-0.0289717	-0.0102316	-0.0884133	-0.0120984
Effect_size	msp_0090	-0.114924	0.0974039	0.0261826	0.0440151	0.247963	-0.0794259	0.152319	-0.0832351	-0.013146	-0.0667836	0.0264178	0.00462721	-0.0380398	0.316086	-0.115203	-0.00594679	-0.214752	-0.0740791	-0.0459899	0.108815	-0.284582	-0.197093	-0.447942	-0.390876	0.174164	0.0839011	-0.0139028	0.198582	-0.0669966	-0.236424	0.00751396	-0.0800969	-0.332854	-0.118892	-0.0244874	0.0896285	-0.013698	0.145117	-0.157878
Effect_size	msp_0091		-0.0443469	0.0861147	0.105544		-0.0119013	-0.0488793	0.0458536	-0.0425304	0.123292	0.0848377		-0.133148	-0.129865		-0.0132896		0.190314	-0.0399137			-0.0364203			0.0014218	0.0635206	0.0307243	0.0436516	0.0514808			0.0463906	-0.0488824	-0.0564382		0.0532618	0.0996521	-0.0583016
Effect_size	msp_0092	0.131884	-0.170691	0.102842	0.0651817	0.263036	0.0589039	-0.0976345	-0.165304	-0.32239	0.033709	0.0282573	-0.0338037	-0.0391488	-0.0065223	-0.116388	0.0586795	-0.0140533	-0.218781	-0.0658563	-0.210493	0.111694	-0.0726808	0.157552	-0.191745	0.115548	-0.0995973	0.105992	0.167072	-0.0167172	0.0323611	0.0292297	0.0836345	-0.123053	-0.0860162	-0.114203	0.0910016	-0.0105758	-0.0978932	-0.00424179
Effect_size	msp_0093	0.0699005	-0.0518647	-0.0689568	-0.0383975	0.0603457	0.00359491	-0.10756	-0.0458714	-0.0785342	0.0794262	-0.0382839	0.00472574	-0.125802	0.051304	-0.0665695	0.0503676	-0.18685	0.122862	-0.115811	-0.102634	-0.195536	-0.182624	-0.550282	-0.222527	-0.0434806	0.104417	-0.119699	-0.0482482	-0.136091	-0.312522	-0.247372	0.0281584	-0.115322	-0.0292937	-0.106142	-0.122406	0.0828655	0.155842
Effect_size	msp_0094				0.0515307		0.00841076		0.101025			0.0742289					-0.00596301			0.016309			-0.0870768			-0.0409876	-0.0794327	-0.088824	-0.0920774	0.178811					0.061048		-0.00993299	0.0119157
Effect_size	msp_0095	0.00597442	0.0592425	0.0899081	0.00798527	0.112872	-0.0096369	-0.105578	0.00419818	0.0623981	0.0824952	0.0388458	0.0556264	-0.239715	-0.240891	0.0482832	0.00132899	-0.136461	-0.00734745	-0.123423	-0.237037	-0.0843072	-0.11925	-0.0232621	-0.21927	0.0770395	0.145216	-0.0398082	0.0191802	-0.0969083	-0.0763573	-0.151	0.0835158	-0.106565	0.0276897	0.317832	-0.141148	0.328125	-0.0654369
Effect_size	msp_0096	0.124351	-0.0188522			0.0798319		-0.0648003	0.0291868	0.0279989			0.0756999		-0.104979			0.0748059	-0.0661338			0.177549				0.153815			0.172978								0.0102172
Effect_size	msp_0097		-0.065944		0.0284092		0.0286146	-0.0405103		-0.0481668	-0.00683032	0.00252788	-0.00792826		-0.00187971		0.0818156			0.0202598	0.0544415	0.0678736					-0.00703707	0.232711	0.0310803	0.0354936		0.033775	0.22248	0.0571341	0.0206096		0.0453696
Effect_size	msp_0098		0.0496079		0.136592		0.0791917	-0.0540094		0.00633994	0.0466766	0.0184589	0.179747	-0.0770231	0.0903883	0.148984	-0.00788892	0.0190634		0.110505		-0.0279025	0.0197124			-0.0626934	-0.0814667	-0.0614999	-0.0235051	0.0106207	-0.0101967		0.0303619	0.138241	0.0802472		0.0480459	0.168337	0.127878
Effect_size	msp_0099		0.0784309				0.0296463	0.0694168		0.144655	0.0466766	0.00357698			0.034175		0.0945285	-0.0882259		0		-0.0931187						0.0216189	0.111287				0.0303619				-0.0751948
Effect_size	msp_0100						0.134244				0.266128	0.0667564	0.0534355							0.0531937			1				-0.0123875	-0.0111339	0.085364	0.0878727	0.0342		-0.0150156	0.110528	0.0790919			0.0593714
Effect_size	msp_0101		0.0278914					-0.00799073		0.0629974	0.084447		0.0785945									-0.124211											0.13919		-0.0173188	0.366239	-0.00759318
Effect_size	msp_0102						-0.0333599													-0.00390687			0.0370668			0.00620837		-0.0425741		-0.0184719					-0.00365995
Effect_size	msp_0103	-0.0556136	-0.00365701	-0.120558	-0.0529489	-0.0427947	0.147562	0.0265219	0.11585	0.293845	0.0503688	-0.0118981	0.201185	0.0856166	-0.0258425	0.41624	-0.0174447	0.225828	0.098032	0.183949	0.0144986	0.155768	0.237348	0.395456	0.076698	-0.11826	0.0316182	-0.0276046	-0.141969	0.19381	0.154839	0.0609797	0.0152622	0.239987	1	-0.00529626	0.018845	0.143107	0	-0.0361572
Effect_size	msp_0104	0.0727238	-0.0388454	0	0.056458	0.188969	0.114775	-0.0110955	0.0600352	0.151366	0.15871	0.0565292	0.134051	0	-0.0922229	0.168439	0.051033	0.218345		0.182229	-0.166753	0.143895	-0.0674803			-0.0264029	-0.00327381	-0.0734389	0.00308971	-0.0515691	-0.0492083	-0.130132	-0.0263989	-0.0367702	0.199161		-0.0813707	0.134247	0.0272575
Effect_size	msp_0105	0.18434	0.266666	-0.0497188	0.0307375	0.388072	0.154791	0.175847	0.00368146	0.10475	0.116682	0.00693824	0.0380511	-0.2322	-0.0573685	-0.0775956	0.069295	-0.165412	0.00418638	-0.0317949	-0.067227	-0.0987865	-0.112791		-0.179402	0.050054	0.148157	-0.00579089	0.0173993	-0.0870275	-0.228178	-0.0381585	0.137622	-0.176854	0.0123827	0.210405	-0.0222448	0.0612124	-0.0424005
Effect_size	msp_0106	0.0204686	-0.0374714	-0.0076898	-0.00944944	-0.0930583	-0.018165	-0.0822426	-0.0148844	-0.0627325	0.148966	-0.0907952	0.0247003	-0.216896	0.00866167	-0.0763824	0.105844	-0.187424	0.255369	0.00430352	0.102138	-0.179043			0.223269	0.0493007	0.101563	-0.0494646	-0.0768173	-0.0566929	-0.270747	0.0210298	-0.0904252	-0.127249	-0.0762463	0.0497846	-0.0951976	-0.00605989	0.196639
Effect_size	msp_0107	-0.0800808	-0.209113	-0.435614	-0.0387981	-0.3288	0.0205661	-0.380205	-0.19794	0.0187789	-0.071514	-0.0403566	0.13965	-0.587849	-0.540958	0.252737	0.0650776	0.238366	0.0858003	-0.132278	0.0756154	0.0822143	-0.294515	-0.364267	-0.339893	-0.22674	0.0504609	0.0855244	-1	-0.148406	-0.275268	-0.131076	0.15653	0.268997	0.0215609	-0.172765	-0.0831188	0.0875792	-0.0627049	-0.152308
Effect_size	msp_0108	0.147872	-0.0112445		0.0908326	0.0394008	-0.0748221	-0.0193379	0.219557	0.150309		0.0732783	-0.0680098	0.00676027	-0.036866	0.00874936	0.0204965	-0.0819241	0.0720234	-0.0169803	-0.0843196		-0.0595451		0	-0.0021138	0.162575	-0.14715	0.000989512	0.0268688	0.0346147	-0.00483793		0.054743	0.0594027		0.0372235	0.116861	0.0292044
Effect_size	msp_0109	0.0862436	-0.0440057	-0.0937138	0.0432208	0	0.185381	-0.0881684	0.119213	0.181329	0.0144152	0.0174203	0.217916	-0.169793	-0.0917328	0.328328	-0.00589399	0.253787	0.0844957	0.0841942		0.0398235	-0.0488124		0	-0.0767715	0.0448756	-0.0194351	-0.154506	-0.0305725	0.0522621	-0.134311	-0.0837527	0.190042	1	-0.0725477	0.00517593	0.214075	-0.0494069	0.00832843
Effect_size	msp_0110	0.0275268	0.108127	0.125557	0.0465456	0.227745	0.12702	0.245239	-0.0225747	0.163655	0.0721903	0.108007	0.235389	0.0805482	0.405896	0.123937	0.0701702	-0.0851982	-0.0684895	0.0312901	0.215891	0.102126	-0.0522485	-0.17142	-0.119097	0.178317	-0.112365	-0.00494363	0.122294	-0.22285	0.038351	0.181292	-0.0205251	-0.0659928	-0.168816	-0.067049	0.145206	0.0849159	0.141652	0.0301251
Effect_size	msp_0111	0.0775251	-0.0460204	-0.0917059	-0.0303577	0.080253	-0.0250265	0.076834	0.083451	0.139994	-0.169878	-0.00196871	0.205113	0.16468	-0.0431077	0.241082	-0.0412175	0.0683266		-0.00779519		-0.0570738	0.193019				0.024194	-0.0514084	-0.102452	0.0731392	0.267766		0.2417	0.272852	0.144989	0.0653539	0.038792	0.136567	0.0439006	0.032396
Effect_size	msp_0112	0.0930062	-0.00671531	-0.117658	-0.0165807	0.146752	0.104248	-0.0426998	0.00442887	0.114951	-0.0797905	0.0329143	0.0415189	-0.206514	-0.281299	0.239418	-0.015311	0.21039	0.113032	0.0047931	-0.0490808	0.286406		0.0232621	-0.0797344	-0.0237944	0.0536029	0.0201472		-0.084455	-0.113362	-0.0634583	-0.0330172	-0.0539325	0.061174	0.218934	0.0422473	0.110467	0.0368221
Effect_size	msp_0113	-0.166961	-0.147246	-0.155077	-0.0616601	-0.0771608	0.0273398	-0.207822		0.0788601	-0.186342	-0.0522887	0.155936	0.135206	-0.0957161	0.332317	0.00381435	0.225292	-0.0875214	0.0771		0.208925	0.0640507			-0.0568011	-0.0268941	0.00579671	-0.112263	-0.0285353	0.09738		-0.277454	0.216574	0.236294	0.094625	0.0271279	0.187863	-0.001693
Effect_size	msp_0114	0.0257584	0.122366	-0.114664	0.0283885	0.296872	-0.0465541	0.104815	-0.0725851	0.0560372	-0.042418	0.0049584	0.0104553	-0.014244	0.149798	0.00129297	-0.014294	-0.143842		-0.0802418	0.0487108	-0.106811	-0.0698627		0.145804	0.203213	-0.0459032	0.0168884	0.1569	0.045538		0.111612	0.198727	-0.00613334	-0.0461011	0.0715781	0.0314825	0.152921	0.0350863
Effect_size	msp_0115c																			0.00826361										0.0214465
Effect_size	msp_0116								-0.0111842	-0.049929	0.0675499	0.00380054	0.0343073							0.0190735	-0.0843196	-0.122094										-0.0620444	0.0440417	-0.0313288		0.0465066	0.00970994		0.0766654
Effect_size	msp_0117	0.147054	0.0747543		0.065093	0.149363	-0.0588831	0.115908	-0.0649568	0.016948	0.034931	0.00686613	0.082686	-0.0674429	0.0948097	-0.0401392	0.00663255	-0.0186863		-0.0699828	-0.0546155	0.0959374	-0.0657323		-0.0607516	0.0618769	0.0283395	0.0281607	0.0655514	-0.0024485		-0.0600966	0.0700373	0.00280116	-0.0391559	0.0529055	-0.00928577	0.0392102	-0.00112721
Effect_size	msp_0118	0.119394			-0.0370835	-0.0261008	0.0318119		-0.0168707	-0.0117943	-0.0864798	-0.0828569	-0.0624186			-0.0492558	0.0535177	-0.203227		0.0424603		-0.12338							0.0328592		-0.00957646		-0.103041	-0.0073333			-0.0110463	-0.0552894	-0.01267
Effect_size	msp_0119	0.0174253			-0.0550116		-0.0146787				-0.00455355	-0.0501056	0.0287578			0.0463918		0.115534		0.0592778		0.00420579	0.0671369				-0.0232448	-0.0228466	0.0134126	0.0652602	0.139857		0.0320031	0.097455	-0.00605363		0.0297241	0.177687
Effect_size	msp_0120	0.0174253	-0.0739663	0.00334995			-0.0139061	-0.037517	0.0261104	0.0794155	-0.00568394	0.00357698	0.0250312	-0.115703	-0.0398942	0.0982504		-0.0632559		0.00449523		-0.0635873					0.000648408	0.0260966	0.0141682				-0.020691		-0.0517965		-0.0780324		0.0745022
Effect_size	msp_0121	-0.10886	0.106785	-0.116592	-0.079765	0.197442	-0.0173733	0.0964188	-0.0210318	0.0417088	0.0858546	0.0367128	-0.0749318	-0.254108	-0.00577445	-0.0724416	0.0145719	0.0129411	0.0582761	-0.0436975	-0.0559233	-0.0594821	-0.170832		-0.185957	-0.0423259	0.0681808	-0.0806038	0.0498407	-0.0876137	-0.177555	-0.15204	0.00615941	-0.207164	-0.0400113	-0.0538481	-0.160764	0.0908499	-0.0784146
Effect_size	msp_0122						-0.023196			0.00231084		0.00357698					0.0609871			0.0580539			-0.067597				-0.0726319	-0.07642	-0.0219113	-0.130174					-0.003358		-0.00993299
Effect_size	msp_0123	0.0174253	-0.0677375		-0.0338584	0.0819055	0.0468998	-0.105152	-0.0976922	-0.168431		0.105385		-0.0728027	-0.156016	-0.0430709	-0.00592199		0.0264325	-0.0595133			-0.0452761				-0.0764541		0.0738015	0.0622424				-0.063742	0.0226043		0.0784078	0.161184	-0.13937	0.0738559
Effect_size	msp_0124	-0.031126	0.0607274	-0.112306	-0.0191872	-0.0437898	0.00606462	0.0280245	0.0494022	-0.27085	-0.206127	-0.0198672	-0.0580762	-0.196773	0.167389	-0.00817336	0.0332692	0.101183	0.0769833	-0.179979	0.19013	0	-0.254727	-0.242124	0.289892	0.025585	0.180514	-0.0824875	-0.0547981	-0.281751	-0.323604	0.0560522	-0.457559	-0.046031	0.00378048	-0.14302	-0.114777	-0.157526	-0.00932822
Effect_size	msp_0125	-0.0366938	0.13967	-0.0799662	0.0384235	-0.00205951	-0.00243744	-0.107458	-0.166781	-0.200216	-0.144981	0.0654673	-0.0413799	-0.172998	0.169618	-0.104779	0.0408555	-0.269473	0.12149	-0.1424	-0.0867032	-0.105904	-0.231947	-0.75308	-0.0679785	-0.068786	0.117212	-0.166705	-0.109084	-0.27888	-0.0982715	-0.146668	-0.10049	-0.00835421	-0.0704521	-0.120156	-0.0255969	-0.00617618	-0.189713	-0.117627
Effect_size	msp_0126	0.0420518	-0.0325719	-0.2253	0.00954166	0.367725	0.197847	0.125574	0.106748	0.369921	0.0581181	0.10367	0.164833	-0.0458696	-0.164858	0.28895	-0.0230088	0.196633	0.0980552	0.0403766	-0.0388131	0.150582	-0.123075	0.492832	-0.27546	-0.114541	0.0774648	-0.140983	-0.11379	-0.225908	-0.266033	0.0492634	0.16088	0.116618	0.25712	-0.22213	0.217136	0.0636595	0.00260304	-0.0397046
Effect_size	msp_0127	0.106171	-0.0947292		0.0593345	-0.0432832	-0.0796266	-0.175814	-0.0449474	-0.034454	-0.158562	0.0292328	-0.0292038	-0.266018	-0.200254		0.0422038	-0.114637		-0.0604087		-0.124251					0.0512889	-0.0919748	0.0609745	-0.10605			-0.0956904				-0.23285		0.126496
Effect_size	msp_0128	0.0233413	-0.0348036	0.0314505	0.078745	0.309498	0.0165033	0.0274322	0.104402	0.136398	0.116583	0.0746937	0.134738	-0.047262	0.105065	0.00991105	-0.00591874	-0.111387	0.0801354	0.0389799	0.127985	-0.133681	-0.131534	-0.162835	0.0890536	0.0109267	-0.0983231	-0.148177	0.0207179	-0.139722	-0.176538	0.0814064	0.110966	-0.113271	-0.0274893	0.188766	0.0328851	-0.0107901	0.018219	0.0236125
Effect_size	msp_0129	-0.0782178	0.272189	-0.118813	-0.00215243	0.0807579	0.0827981	0.125082	0.0181095	0.151505	0.186013	0.0787879	0.230471	-0.010325	0.224669	0.0827319	0.0400933	0.0812533	0.0944161	-0.0370166	-0.0794744	-0.0825653	-0.152696	0.0645497	-0.378758	0.0737287	0.174233	-0.0181502	0.0447025	-0.131366	-0.221129	-0.0443398	0.250291	0.0215457	0.0961052	0.0653807	0.239973	0.159178	0.15052
Effect_size	msp_0130	0.0591131	-0.0172724	0.183946	0.124939	0.0211124	-0.0285416	0.0209528	-0.0390845	-0.0804377	0.0475922	0.0225479	0.0352829	-0.100332	-0.0146069	-0.0664364	0.0227114	0.0405067	0.00734745	-0.0478476	-0.0320092	-0.175816			-0.379558	0.0528249	0.0391355	-0.0162779	0.040464	-0.0468672	-0.160497	-0.152881	0.169227	-0.151856	-0.0556932	0.0620618	-0.104192	0.0277576	0.128157
Effect_size	msp_0131	-0.118398	0.187337	-0.0844367	-0.148657	-0.157164	0.00509759	0.146885	0.0773107	0.0688384	-0.093097	-0.0162889	0.0255468	0.0554762	0.186796	0.0329953	0.0456443	-0.0287493	0.200924	0.0464727	0.11974	-0.20144	0.0259499	0.102062	0.223269	-0.0241374	-0.0557374	-0.0396424	-0.0666125	-0.10102	0.0201202	0.17731	0.0801872	0.0406206	0.0508365	0.167005	-0.0858086	0.138744	0.0879699	-0.103562
Effect_size	msp_0132	-0.0487	0.0109124	-0.146694	0.0716764	0.0253594	0.0431895	-0.0422951	0.0247377	0.0790097	-0.0736543	0.0655796	0.136085	0.0418337	-0.0207036	0.16377	-0.00940519	0.117649	0.00381085	0.0844078	0.10421	0.0729165	-0.0426452		0.136139	-0.0673642	0.0424638	-0.0515648	-0.119463	0.0306567	0.0725892	0.133089	0.133729	0.0355075	0.197319	0.00196742	0.0454621	-0.006225	0.154511
Effect_size	msp_0133	-0.10676	0.0354418	-0.0808087	0.0255781	-0.00869101	-0.082082	-0.184356	-0.0654922	-0.0536897	-0.0756566	-0.0143022	-0.108252	-0.191388	-0.13396	-0.0697662	0.0716209	-0.14819	0.0356133	-0.0362117	0.0682693	-0.190632	-0.139075		-0.0326077	-0.0495935	0.0339049	-0.0778142	-0.00427392	-0.0828816	-0.131048	0.0645028	0.0111647	-0.0960218	-0.00937398		0.0523204	-0.0566786	0.0208134
Effect_size	msp_0134	0.0174696	0.20781	-0.0965326	-0.0133809	0.103584	-0.0113451	0.0750056		0.237384	-0.00949098	0.0912552	-0.0840505	-0.0409541	-0.0378218	-0.0411827	0.0653307		0.191421	-0.0579736	0.1065		-0.0149042			0.0129276	-0.194806	0.0890311	-0.0132718	-0.0187441	0.0628997	0.109195	0.219021	0.0177204	0.0872596		-0.00820057	-0.0548981	0.0712461
Effect_size	msp_0135	0.0310878				0.0761943			0.103953	0.0463541			0.091725			0.167436				0.09994			0.0562044								0.0983352			0.0905132	0.0522085
Effect_size	msp_0136	0.0762503			0.0498194	0.147128		0.0960941	-0.0844051	-0.180523		0.0136852	-0.00945018		-0.0032018	0.00721504			-0.0901825	-0.0250236		0.0678736					-0.0205453	0.051268	0.0440536	-0.0289403					-0.0166581	0.244712	0.0236642	0.11474	-0.136603
Effect_size	msp_0137	0.0775907	-0.0273517	-0.0735623	0.0335192			0.000728069		0.213467	-0.02162	-0.0202802		-0.166403	-0.165924					0.0144642							-0.0394054	0.0200638		-0.0311894			0.0336307		0.08993		0.0274171	0.0732708	-0.0243273
Effect_size	msp_0138	-0.0693058	-0.12238	-0.182188	-0.0676275	0.0104482	0.0527094	-0.177288	0.147684	0.0211813	-0.269148	-0.0740911	-0.031721	-0.234104	-0.187278	-0.038487	0.0697669	0.128856	-0.375034	-0.0857671	0.094538	0.0323271	-0.151769	-0.0261354	-0.0628335	0.00319143	0.0403196	0.143406	-0.133421	-0.141176	-0.0647672	-0.0173446	-0.201411	0.101679	-0.100232		-0.0644168	-0.0167666	-0.0527329	-0.0220096
Effect_size	msp_0139	-0.0324195	0.0162674	-0.227276	-0.0033684	0.238678	-0.0887725	0.111982	0	0.023803	-0.0722629	-0.0546797	0.177745	-0.0953139	-0.00275746	-0.038992	0.0315378	-0.167198	0.115395	-0.0459239	0.0980473	-0.25495	-0.111368		-0.335717	0.130406	0.0525022	0.0699324	0.0229231	-0.0809108	-0.162136	-0.120249	0.0681959	-0.172277	-0.106904	-0.0845131	0.03672	0.0133428	0.114706
Effect_size	msp_0140	0.0293113		0.140698	0.0763719	0.241163	-0.040509	0.116403			0.144463	0.0130603	0.00526649	0.113373	-0.0032018	0.0719929				-0.0171762			0.0756244				0.0184135	-0.03135	-0.0398561	0.0827285	0.116897			0.192649	0.0320797		-0.074628	0.0119157
Effect_size	msp_0141	-0.12827	-0.105278	-0.479507	0.110957	-0.188944	0.0366181	-0.287368	-0.0653594	0.035071	-0.0975137	0.0882054	0.0800492	-0.496071	-0.380392	0.0983452	0.0396157	0.285567	-0.147943	-0.0369434	0.0387338	0.132689	-0.291515	-0.214275	-0.298418	-0.139619	0.0887911	0.0418788	-0.250269	-0.171573	-0.264757	0.0158645	0.0261472	0.163889	0.0351479	-0.00326542	0.0788898	0.0588414	-0.1177	-0.154939
Effect_size	msp_0142	0.00501912	0.0711302	-0.245677	-0.075019	-0.0141376	-0.047621	-0.0456003	0.0123302	0.0260202	-0.049373	0.100404	-0.0227747	-0.514024	-0.352058	0.137471	-0.0159077	0.124316	0.0740791	-0.0388232	0.215973	-0.0990397	-0.201866	-0.365782	-0.067953	-0.12123	0.107336	0.0523775	-0.187179	-0.198549	-0.306202	-0.0889782	0.0630336	0.050997	-0.0552328	0.0147181	0.0897705	-0.111174	-0.114741
Effect_size	msp_0143	0.0275349	0.251944		-0.0692518		0.0963028	0.0918115		0.167711	-0.04851	-0.0396509	0.0673356	0.02359	-0.00187971			-0.0207747		-0.0264079		-0.0315028	-0.0309523				-0.0407747	-0.0207574	-0.027774	0.00306059			0.0115558		-0.0606908	0.123607	-0.008995	0.0433942	0.105812
Effect_size	msp_0144	0.11087	-0.0366388	-0.0759087	-0.049444	0.361402	0.105089	-0.053707	0.163207	0	0.110574	-0.0705552	0.156028	-0.385499	-0.0926593	-0.00575763	0.0389478	-0.248079	-0.00418638	-0.0334431	-0.236868	-0.268803			-0.626225	-0.00941019	0.0959261	-0.0585935	-0.0422731	-0.120567	-0.293469	-0.350868	0.00386974	-0.212566	-0.0204094	0.129192	-0.0425275	0.0261656	0.257053
Effect_size	msp_0145	-0.148693	-0.126085	-0.0147422	-0.00479503	0.147658	-0.138266	-0.0162223	-0.211278	-0.0607616	-0.0894616	0.0183725	-0.0719266	-0.00691396	0.0537666	-0.086413	-0.00958362	-0.264295	-0.0460075	-0.00469224	0.0653497	-0.21325	-0.131995	0.209359	0	0.103063	0.0489236	0.083604	0.110556	-0.0794612	-0.0774246	0.0670021	0.104161	-0.187257	-0.205617	-0.179105	-0.0465071	0.0152589	-0.0514123	-0.00802118
Effect_size	msp_0146c	-0.0886972	-0.285833	-0.211697	-0.0454901	-0.213018	0.187072	-0.295109	0.159613	0.0172074	-0.0543385	0.0674585	0.154977	-0.493742	-0.570049	0.127407	-0.0283396	0.102081	-0.033145	0.00853869	0.101039	0.04543	0.0101456	0.170103	0.109308	-0.0491543	0.0312397	-0.0336657	-0.153561	0.108083	0.0692465	0.122431	-0.183864	0.0478949	1	0.276457	0.0132714	-0.0547862	-0.0879431
Effect_size	msp_0147	0.122575	0.195447	0.0140557	-0.0217115	0.0819055	0.128994	0.272648	-0.0304014	0.233842	0.0458185	0.0386067	0.234241	0.271124	0.173256	0.328137	-0.0084252	0.0986481		0.0815979	-0.18254	0.130097	0.0501739		-0.163962	-0.0207855	-0.0502799	0.0018292	-0.0028341	-0.0217383		-0.0117278	0.134804	0.00995472	0.137884	0.320937	-0.00712591	0.350591	-0.0595972
Effect_size	msp_0148c	-0.0428284	-0.0264795	0.0759087	0.0883518	0.157894	-0.00540451	0.0250658	-0.0499204	0.0117984	-0.116728	0.0556315	0.0269376	0.173849	0.0091558	-0.0739574	-0.00649184	-0.016259	-0.00641083	-0.0738887	0.128747	0.203453	0.129286		0.478406	-0.0467726	-0.0277172	0.0158903	-0.126135	1	0.40452	0.137474	0.012642	0.16003	0.106597	-0.106339	-0.144374	-0.0329666	-0.0494234	0.141689
Effect_size	msp_0149						0.000473936			0.00231084							0.0913859			0.0492481			-0.0665628			-0.0339901	-0.143548	-0.12707	-0.0837064	-0.133495					0.0801593				0.0712461
Effect_size	msp_0150c	0.157021	0.0490447	0	0.00342595	-0.0956482	1	-0.0423073	0.193313	0.104631	-0.0121799	0.106209	0.175817	0.0189787	-0.075815	0.253006		-0.0242606		0.0222661		0.0394536					0.0044419	0.0511404		0.0147165	-0.0300182		-0.0249719	-0.00346485	0.19967	0.0260924	-0.0432771		0.073621
Effect_size	msp_0151	-0.0478816	0.0919842	0.0718541	0.0263106	0.10254	-0.0668538	-0.00514744	-0.0118613	-0.00415673	-0.0288763	0.0768491	0.11387	0.010281	0.385639	-0.0742154	0.0248262	-0.243116	0.283248	-0.0718823	0.0314491	-0.255884	-0.098812	-0.195283	-0.206595	0.0583551	-0.0114291	-0.0271117	0.0724197	-0.0919306	-0.112299	-0.0111398	0.210191	-0.145416	-0.154251	-0.104601	0.021456	-0.0493636	0.0933055	-0.0478142
Effect_size	msp_0152	0.222664	-0.0869369	-0.246502	0.0460374	0.154132	-0.0686932	-0.125329	-0.100479	-0.056793	0.0301567	0.151457	0.112763	-0.481001	-0.349872	-0.0545359	0.0443373	0.0987282	-0.103711	-0.123702	0.219469	-0.0274496	-0.213268	-0.667014	-0.322898	-0.129172	0.0521095	-0.0600726	-0.14083	-0.00619018	-0.312448	-0.0309052	0.153888	0.0514423	0.017195	-0.011428	0.0345702	-0.219643	-0.210187	-0.0645399
Effect_size	msp_0153	-0.110244	-0.0821079	-0.115896	-0.00891373	-0.00824946	0.219417	0.0968959	0.213393	0.314869	-0.0724498	-0.0222384	0.273359	0.266215	-0.0217545	0.355006	-0.00164344	0.219477	-0.0683703	0.208693	0.138845	0.211884	0.271492	0.653385	0.218706	-0.129818	0.0234832	0.00169024	-0.223926	0.202536	0.220738	0.166304	0.0317319	0.321059	1	-0.0547132	-0.0564445	0.221578	0.014354	0.083848
Effect_size	msp_0154	0.0282335	-0.0318814	-0.274672	-0.0675039	-0.204812	-0.0523785	-0.0838819	-0.0467466	-0.209495	-0.0174598	-0.024861	0.13342	-0.393389	-0.227004	0.0967441	0.0220361	0.110901	-0.103552	-0.0797248	0.3707	0.0849212	-0.291515	-0.75308	-0.409259	-0.13179	0.0618195	0.108681	-0.228778	-0.172658	-0.218546	0.000834879	-0.016623	0.127355	0.0318409	-0.14302	0.0445852	0.0049239	-0.0487117	-0.167646
Effect_size	msp_0155						0.0280563										0.00270849			0.0766698			-0.0328193			-0.0558546		-0.132965	-0.0283063	-0.124478					0.0165464
Effect_size	msp_0156				0.0723508		-0.0409902	-0.0778067				0.0461517	0.0260189	-0.00807343	0.034175	0.0458616	-0.000717175	-0.0434357		0.0604173			-0.0334821			-0.0270423	-0.0877252	-0.102862	-0.0779812	-0.0107118					0.0750146			0.0342248
Effect_size	msp_0157		-0.0885733	0.252213	0.0656558		-0.0162657	-0.167175			0.143126	0.0310285	-0.0426397		-0.178256	-0.0291209	-0.0264717			-0.047173			-0.00509036			0.0076546	0.0122203	-0.0709945	0.0359481	0.0652051				0.0239018	0.106027			0.0867923
Effect_size	msp_0158	-0.21823	0.0205656	-0.226225	-0.032881	-0.289601	-0.143215	-0.0992161	-0.137471	0.0600597	-0.249175	-0.0915598	0.0346149	-0.203241	-0.156204	0.00365264	0.00818904	-0.112386	0.06582	-0.124043	-0.061014	-0.0760225	-0.137438		0.0575235	-0.0606799	-0.0941309	0.188844	-0.101802	0.0975897	-0.0805963	-0.135706	-0.0354496	0.171486	-0.0313962	-0.00249754	-0.0978055	0.0705885	0.0504474
Effect_size	msp_0159	0.0787841	0.0244343	0.242998	-0.00774854	0.174662	-0.0595261	0.0902294	-0.0230102	-0.0471935	0.112949	0.0228758	0.0924957	0.00666223	0.12251	-0.0577249	0.0577749	-0.148522	0.283292	-0.0309689	0.161531	-0.191875			-0.243006	0.0714754	0.0126286	0.0843118	0.125492	-0.117771		-0.00319745	0.146046	-0.160005	-0.104735	0.334845	-0.0627373	-0.0687469	0.00666487
Effect_size	msp_0160	0.133066	-0.00335766		0.15814	0.187036	0.0269069	-0.00545655	-0.165284	-0.0870062	0.100906	0.0868943	0.255742	-0.222153	-0.138875	-0.0320596	0.0819047	0.0593293	-0.108288	-0.0244284		0.161134	-0.0697277			-0.00134208	-0.0121923	-0.0615772	-0.0499881	-0.0486964	-0.0765093		0.200659	0.0544187	0.0325556	0.0277388	0.0610741	-0.0763944	-0.0968636
Effect_size	msp_0161	0.101473	-0.100448	0.0661371	-0.0326952	0.168586	-0.0964357	-0.18982	-0.208393	-0.120252	0.0607529	-0.0381243	0.0168179	-0.320406	-0.116284	-0.0442812	-0.0246443	-0.102271	0.150623	-0.0999135	0.168547	-0.162794	-0.119801		0.267923	-0.0725581	-0.014491	-0.0785024	-0.153636	0.180749	0.180922	0.137736	0.246138	-0.101262	-0.0807529	-0.0590902	0.115043	-0.021315	-0.0870798
Effect_size	msp_0162	0.00106455	0.0334793	-0.040868	0.0764286	-0.00378525	0.0555711	0.0932627	-0.0870598	-0.0421539	-0.0173891	0.155611	-0.0309289	0.0316391	0.100196	0.0227263	0.00967501	-0.0530816		0.0170808	-0.0843196	0.0124032	-0.0761633		0	-0.14084	-0.0249521	0.125277	-0.224675	0.0507542	-0.00344244	-0.0660473	-0.00272922	0.0680831	0.206182		0.0489911	-0.0534239	-0.0560659
Effect_size	msp_0163	0.181545	0.0106084	-0.123658	0.0289413	-0.0140276	-0.0668984	-0.0384501	-0.131199	-0.00160311	0.0140601	0.045857	0.0762817	-0.303263	-0.195225	-0.0194748	0.0112047	-0.07219	-0.13164	-0.0474347	0.0476383	-0.0884212	-0.218182		-0.315908	-0.10314	0.0500383	0.0190803	-0.156444	-0.0587586	-0.119165	-0.130902	0.105066	-0.0614712	-0.0641898	-0.0224778	-0.0319747	-0.143934	-0.0545222
Effect_size	msp_0164	0.114144	-0.00725407	-0.186014	-0.0433674	0.00030026	-0.0217127	-0.155152	-0.316451	-0.152954	0.0654673	0.00423623	-0.06795	-0.35653	-0.120496	-0.143787	-0.00492692	0.00144404	-0.0888268	-0.152867	-0.00555627	0.00712189	-0.226491		-0.445053	-0.0246557	0.00702073	-0.0939587	-0.0518359	-0.0892044	-0.269968	-0.0748686	0.178832	-0.0877327	-0.0669283	0.0506214	-0.0332588	-0.174476	0.020564	-0.104207
Effect_size	msp_0165	-0.101729	0.0850902			-0.14798	0.0299208	0.112902	0.149352	0.114249	0.0811991	-0.0200975	0.00502588	0.0792664	0.116878	0.0351341		-0.179629	0.0912297	-8.12665e-05	-0.152216	-0.0956589								0.0131079	-0.0139535	-0.277956	0.0303619	-0.0808236	-0.00480346	-0.106339	-0.102994	0.0179344	0.218109
Effect_size	msp_0166	-0.145766	-0.248676	-0.193456	-0.0768976	-0.126103	0.103214	-0.127267	0.03982	-0.109757	-0.171902	-0.0912541	-0.0135973	-0.401358	-0.322394	-0.0340363	0.0414322	0.231973	-0.0742843	-0.0648895	0.338228	0.0467286	-0.154718	-0.107583	0.102705	-0.00170322	0.172752	0.172582	-0.0607772	-0.161227	-0.0737979	0.208079	-0.240511	0.152007	0.00957565	0.00816474	-0.0584141	-0.120834	-0.105568	0.0218138
Effect_size	msp_0167c																			0.0412502			0.0892854						0.0231794	0.0379831					0.0508655
Effect_size	msp_0168	0.089043	0.286639	0.0974913	0.104604	0.0956206	0.00512935	0.165321	-0.128928	-0.0094953	0.213562	0.051338	0.0589453	-0.108632	0.000984327	-0.0336303	0.0315338	-0.135661	-0.0954779	0.0141249	0.258904	-0.107349			0.314168		0.161416		0.020731	-0.0227361	-0.131601	0.0888059	0.164029	-0.091399	-0.058001	-0.11472	-0.0527825	-0.029678	-0.120767
Effect_size	msp_0169	0.0873972	-0.0320216	0		-0.0426919		-0.0707459	-0.126421	-0.239543	0.120955		0.0186886	-0.18486	-0.122832	-0.063332		0.0416756	0.0178066			-0.0389563									-0.175974		0.0140955	-0.139062		0.0997255	-0.00040371	-0.0432673	0.0344634
Effect_size	msp_0170	-0.0121573	0.111556	-0.0230694	0.028416	0.185866	-0.0138854	0.154117	0.0882155	0.151052	-0.0709214	-0.047527	0.0562413	0.0300255	0.208079	-0.120725		-0.253999	-0.0624203	-0.0451418	-0.167224	-0.135652		-0.048795	-0.334904	1	0.0603212	-0.0452453	0.0256581	0.0518941		-0.184198	-0.00208293		-0.0797453	0.0490764	-0.0577939	0.252014	0.161738
Effect_size	msp_0171	-0.0446492	-0.000911988	0	0.0144352		-0.0647213	-0.0140033	0.0552324	0.0644154		0.050015	0.149195	0.0548658	-0.0444275	0.115425	-0.0150115			0.0286208			-0.0175474				-0.0415497	-0.0738522	-0.109962	-0.0514137	0.120341		0.216461	0.285702	0.164444			0.155023
Effect_size	msp_0172	-0.102552	0.00994142	0.195045	-0.0337251	-0.0055829	0.282985	0.223091	0.173728	0.318384	0.141174	0.105107	0.122086	0.390908	0.309489	0.275453	0.0311115	0.281574	0.118436	0.0952339	-0.00184447	0.154617	-0.0959524	-0.042855	0.254824	-0.0156854	0.0765918	-0.0465905	-0.0888461	-0.200651	-0.151371	0.000834898	-0.222569	0.133534	1	0.110419	-0.0107156	0.128725	0.372074	0.0455389
Effect_size	msp_0173	-0.000840029	-0.0827324	-0.0325893	-0.0621603	0.218535	0.129649	-0.134021	-0.0622575	0.0416002	0.0798424	-0.0735636	0.028396	-0.424071	-0.254385	0.0572624	0.0904451	-0.283268	0.264086	-0.0247092	-0.242334	-0.169658				0.00924268	0.103037	-0.0306845	-0.00483978	-0.0826157	-0.233205	-0.459976	-0.0311982	-0.152438	-0.0624863	-0.133963	-0.0970486	-0.0314019	0.0280676
Effect_size	msp_0174	0.0307421			0.0168721	-0.0121587	0.0389964			-0.0556468		0.0479374	-0.00480968			0.082547	-0.00577948			0.0704888		-0.124211	0.00727732			-0.0250734	-0.0403731	-0.180029	-0.0028383	0.0507381	0.118018			0.0512803	0.152419		-0.0826725	0.0700021		0.085214
Effect_size	msp_0175	0.233286	-0.0956781	-0.140633	-0.0176833	0.23431	-0.140938	-0.101901	-0.211056	-0.173246	-0.142114	-0.051997	-0.0811705	-0.242117	-0.125022	-0.0484926	0.075323	-0.0647748	-0.0968888	-0.161325	-0.0840338	-0.112136	-0.17241		-0.0862852	-0.0382132	-0.0148942	0.0421826	-0.0934283	-0.152506	-0.160306	-0.0247638	0.138981	-0.0186962	-0.0759663	-0.238212	-0.0688665	0.015219	0.0443182
Effect_size	msp_0176	0.0748887			0.0168439	0.037914	-0.00899106	0	0.0234918	-0.0919292		0.0315065			-0.0560033	0.0895843										0.172827	0.0955512	0.032918	0.223921	0.0177067				-0.00525681	-0.0285456		0.0879641	0.20365	-0.0742315
Effect_size	msp_0177	0.0678755	-0.133222	0.0308489	-0.0694849	0.183749	0.121814	-0.039197	-0.0513192	-0.0886915	0.00936926	-0.0546623	0.0687415	0.171015	-0.0728585	0.0159136	0.100648	0.0431511	0.0178066	0.0277814		0.0566896	0.0418226				0.00737701	0.0993653			-0.0937231		-0.109984	0.0437382	0.0554064		0.0439564	0.0787387	-0.035179
Effect_size	msp_0178	-0.002355	-0.0714765	-0.0646896	-0.0448712	-0.0109409	-0.125529	-0.22435	-0.151334	-0.0501679	0.0660241	-0.11895	0.100509	-0.500852	-0.292624	-0.0555247	-0.00616619	-0.0258835	-0.0696046	-0.126708	0.0932055	-0.0518886				-0.00089934	0.124616	-0.0575144	0.0855841	-0.0647887	-0.136793	-0.0226313	0.124485	-0.0511932	-0.103467		-0.00402261	-0.0965672	-0.221541
Effect_size	msp_0179	0.176104	0.041			0.0129276	-0.042306	-0.037684	-0.113828	-0.182234	0.0277189		0.0179058	-0.0968812	-0.0416935	-0.0538158	0.0613707	-0.0576703	0.126256	-0.0729421		-0.250219				0.0128457	0.0142297		0.00566114	-0.0335447	-0.114749		0.130812	-0.0958682	-0.102152	-0.0341401	0.0234722	-0.00653974	0.032142
Effect_size	msp_0180	-0.158477	-0.0554934		-0.0271237	-0.194219	0.21006	0.0128406	0.0302881	0.158412	-0.0969554	-0.04668	0.336994	0.1477	-0.13954	0.407715	0.0196603	0.340209		0.0769682		0.322107	0.149013			-0.0229628	0.0189911	0.0714393		0.0897977	0.246972		-0.158546	0.178588	0.267339		-0.088373	0.0791095	0.0653795
Effect_size	msp_0181	-0.00248734	-0.00455994			-0.0665122	0.172707	0.0357507	0	0.0552103	0.11628		0.0790424	0.0269599	-0.0981672	0.143094		0.185647		-0.000162533		-0.110161							0.0304234		-0.0540687			-0.0702595	-0.00472956	0.0809755	-0.134056	0.22429	-0.0197659
Effect_size	msp_0182	0.0275349			0.0130969	0.0261594		0.01643		0.0616769		-0.00203741	0.0315855	-0.0461404	-0.0936012	0.143355	0.0310024	-0.0409487		0.0337332	-0.0843196	-0.0116384		0.434099	0		-0.00691729	0.0556002		0.000256224	0.0485842	0.0107111		0.252175	0.103654	0.0591297	0.102167	0.140899
Effect_size	msp_0183	-0.128592	-0.036132	-0.0892926	0.0357148	-0.169056		0.140761	-0.0907327	0.0596024	-0.0179274	0.00825905	0.0891276	-0.00654164	0.0168811	-0.0732703		-0.00366475	0.104659	-0.0303989	0.0234734	-0.0487676			-0.357231		0.0195045			0.00852987	-0.102674	-0.0104073	0.334568	-0.0494844	0.0172842	0.272231	-0.0577298	0.137182	0.202438
Effect_size	msp_0184		0.0213072		0.0598739		-0.0148827	0.077137	0.083451	0.00558029		0.0295982	0.140703		-0.00106727	0.00657711	-0.00610705			0.0691287							-0.0618788	-0.075592	-0.0636989	-0.0748243				-0.0303936	0.0543971		-0.0425342
Effect_size	msp_0185	0.0613249	0.0349774	-0.124707	-0.0156643	0.20966	0.103795	0.176061	0.272513	0.132081	-0.0415833	0.00320864	0.000976151	0.220102	-0.0178739	-0.0305895	0.0464377	0.152204	-0.169168	-0.0371563	-0.236763	0.104477		-0.348932	-0.268443		0.0351614	-0.0147456	-0.00629213		-0.0469246	-0.263612	-0.190303	0.0445432	-0.0421597	0.00249754	0.0367882	0.113068	0.0663622
Effect_size	msp_0186	0.0441464	0.141852	-0.00120666	0.00510417	0.107379	-0.0737161	-0.00988446		0.0615778	-0.0929647	-0.00284527	0.00242852	-0.0371815	-0.00466794	-0.00622823	0.0644215	0.139428	-0.0720234	-0.103719	-0.0659794	0.157325	-0.0782477		-0.267307	-0.0777461	-0.00992212	-0.0191874	-0.0961689	-0.163306	0.0523018	-0.086047	0.178821	0.0698558	0.0481812		0.101578	-0.0134011	0.0329239
Effect_size	msp_0187		0.0443469	0			-0.00347039	-0.0131281	0.0584027	-0.0211034	-0.0634802	0.0294155	0.091725	0.0819081	0.0896324	0.0507532	0.0500662	0.00882076	0.179741	0.00400218							0.0641869	0.0417155	0.0287455				0.0665929		-0.0210108	0.234299	-0.0293195		0.0168427
Effect_size	msp_0188	0.0902358	-0.174017	-0.344895	-0.0420146	-0.0600108	-0.0410068	-0.182023	-0.0711316	-0.0459333	-0.0133467	0.080447	-0.0191487	-0.502101	-0.378278	-0.18662	0.0140463	-0.0878701	0.195794	-0.151996	-0.0461187	-0.140361	-0.235079	-0.578542	-0.238194	-0.211185	0.028036	-0.114316	-1	-0.171023	-0.37447	-0.177711	0.118193	-0.0516782	0.0668774	-0.146998	-0.0669477	-0.150069	-0.100281
Effect_size	msp_0189	-0.0973737	-0.197191	-0.123037	-0.0382919	0.0922176	-0.105371	-0.0553814	-0.0469422	-0.0409748	-0.0592453	-0.0847044	-0.104217	-0.183413	0.0524128	0.0229584	0.146523	0.00973372	-0.249813	-0.0686434	-0.191988	-0.0375126	-0.23469		-0.401885	-0.065274	0.0787362	0.0831501	-0.110179	-0.122355	-0.0971309	-0.2111	-0.0842064	0.042357	-0.0698519	-0.0853503	0.0611918	0.0410062	0.0066635
Effect_size	msp_0190	0.0775907			0.0598739	0.127189		0.0490117	-0.0583735	-0.0551403		0.0295982	0.0443307			-0.0339839				-0.00966305							-0.00851318	-0.00812719	0.0330385	-0.0165408				-0.0477953	-0.0350875		-0.0033052	0.106927	-0.0898604
Effect_size	msp_0191		0.0767013		0.109	-0.0972693	0.0249696	-0.0854908		0.0650899	-0.0398407	0.0231895	0.0420237	-0.116826	0.0980268	0.0969502				-0.0618766						0.00166806	-0.0115748	0.00871235	0.062946	0.0758687			-0.0374409		-0.0818346		0.0141767	0.120555		0.0634225
Effect_size	msp_0192	0.125972	0.10995	0.130251		0.0842401	-0.0127711	-0.0401259	0.0459897	-0.018435	0.179842	-0.0457179	0.121086	-0.238041	-0.139268	0.00524595	-0.01346	-0.090403	0.200325	0.0403641	0.163727	-0.0586219			0.0546541	3.64564e-05	0.00252601	0.0528633	0.0407441	-0.0990081	-0.192048	0.0828647	0.0978802	-0.107666	-0.0339622	0.0142446	-0.174031	-0.0593024	0.110879
Effect_size	msp_0193	0.0587013	-0.129694	0.0607047	-0.0840291	-0.0399105	0.0898645	-0.0115614	0.195715	0.163884	0.150562	-0.0470199	0.0727825	0.203551	-0.0804407	0.314767			-0.196864	0.0267258		-0.099127	0.157946				0.00794495	-0.03326		-0.00500048	0.0732199		0.0424808	0.126278	0.0876534	0.0591297	0.048361	0.193038
Effect_size	msp_0194	0.165759	0.0813033	-0.13263	0.00427934	0.135268	-0.177977	-0.197636	-0.232327	-0.279066	-0.0811381	-0.0586965	0.00565209	-0.305002	-0.0721492	-0.154348	0.035385	-0.103836	-0.123331	-0.108525	-0.267061	-0.0690818	-0.181319		-0.364509	-0.0599253	0.0276772	-0.0868696	-0.048229	-0.117122	-0.210423	-0.255209	0.16159	-0.0452348	-0.0801191	-0.185997	0.0600985	0.0439481	-0.0850894
Effect_size	msp_0195	0.0883413	0.24327	-0.158734	0.114264	-0.0161911	0.0351454	0.0687122	-0.082832	0.0923004	0.0214469	0.0948477	0.291355	-0.0288876	-0.0138217	0.00212366	0.00760756	-0.040164	0.0795412	-0.0360799	0.100296	-0.0129826	-0.0283255	0	-0.111635	0.0446579	-0.0870498	0.0177016	-0.0565957	-0.111218	-0.160665	0.0275473	0.0839329	-0.111854	0.0101847	0.149044	0.0214829	-0.11029	-0.0925836	0.0146966
Effect_size	msp_0196	0.0470431	-0.00583145	0.246465	0.114654	0.171821	-0.0904193	0.0459299	-0.0880551	-0.0319863	0.0725656	0.0970033	-0.050816	0.0473608	0.457487	-0.0922641	0.0390035	-0.290204	0.145195	-0.0742144	0.267803	-0.284077	-0.19393	-0.494881	-0.136111	0.155414	0.0750016	-0.0528439	0.18897	-0.120593	-0.249723	0.0950579	0.052192	-0.340078	-0.173763	0.0457326	0.0168348	0.0211257	0.177599	-0.0890256
Effect_size	msp_0197			0.00334995	0.0627177		0.0877093	-0.0414524			-0.0597461	-0.0271295	-0.019286	-0.0487769			0.0425241			0.0727438			-0.0302764			-0.0164148	-0.0662552	-0.0669002	-0.0503189	0.00844031			0.0720514	0.331241	0.108042		0.0629654
Effect_size	msp_0198	-0.108364	0.0666968	0.0698543	0.016359	0.0736711	-0.079148	0.0705375	0.00452064	0.0158977	0.0121528	0.00248802	0.110989	0.00268487	0.0523382	-0.0350624	-0.00464983	-0.016923	0.0642832	-0.0318528	-0.233942	-0.0939727	-0.108403	-0.418214	-0.490089	0.0280458	0.0736844	0.0279144	-0.0313246	-0.035101	-0.131629	-0.11276	0.285674	-0.120735	-0.134741	-0.0810828	-0.128139	-0.0627486	0.0369949
Effect_size	msp_0199	0.0686135	-0.0753658	0.343979	-0.00710457	0.13729	-0.0769906	0.121865	-0.125415	-0.121161	0.267228	0.00854039	0.0175639	-0.134067	-0.224045	0.045992	0.0369661	-0.145178	0.12858	-0.122443	-0.0955259	-0.107712	-0.0735237		-0.0862852	0.132018	-0.0800169	-0.0393977	1	0.0398478	0.0212765	-0.123895	0.308785	-0.0390297	-0.0929708	0.0356597	0.0684962	0.107774	-0.0213911
Effect_size	msp_0200	0.0170203	-0.0271		-0.0277811	-0.0919987	0.0696627	0.0636263	0.0249155	0.173512	-0.138147	-0.0528601	0.161411	0.265189	-0.154081	0.348095	0.00468434	0.306617	-0.0432141	0.145146	-0.0931954	0.288394	0.120301	0.601115	0	-0.0614813	-0.0271607	-0.0348051	-0.114779	0.0446972	0.340516	0.039179	0.028121	0.124894	0.236366	0.513679	0.0655116	0.223559	-0.0230411	0.0203942
Effect_size	msp_0201	0.0275349				0.149363	0.0387991	0.00205699	-0.0180667	-0.0452298		0.022593	-0.0118924	-0.0590834	0.036909	-0.0217955		-0.102813				-0.0282973					0.0295738				-0.0384909			0.000353908	0.00342699	0.0411458	-0.0951757	0.160856	-0.0432037
Effect_size	msp_0202	-0.0569534	0.0744958	-0.138547	-0.0461749	-0.034453	-0.101017	-0.00804701	0.114473	0.0497464	-0.129911	-0.0831874	-0.115808	0.0098194	-0.121074	-0.0943338	-0.0558197	-0.103075	-0.381911	-0.0667681	-0.223617	-0.18866	-0.0223092	-0.255883	-0.108909	0.160675	0.126453	0.117135	0.0965316	0.0141528	-0.0806538	-0.11742	0.0813732	-0.103496	-0.155407	0	0.0384425	0.0491888	0.0695112
Effect_size	msp_0203	0.0686135	0.167378	-0.141797	-0.0214233	0.188897	0.13171	-0.0146929	0.172469	0.199221	0.0383894	0.0179146	0.0581469	0.14843	0.124015	0.0956807	0.00696207	-0.103682	0.0264325	0.00508374	-0.129515	-0.0867222	-0.135149	0.170783	0.099668	-0.0833633	-0.136422	-0.000893903	-0.0660677	-0.120316	-0.048257	-0.126918	0.0497498	0.00626273	0.10277	-0.0348197	0.0149208	0.0605254	0.260876
Effect_size	msp_0204	0.00727238	0.206673		0.0391536	0.0428343	0.0908261	0.22374			0.0110669	0.100162	0.15831	0.219807	0.0859914	0.0110584	0.00164687			0.00811174	-0.0504878	-0.0483168	0.0787746		-0.0326077	-0.00856732	0.0737639	-0.0429013	0.00407553	0.151137	0.0399106	-0.0700502	-0.0363977	0.0891683	0.118907		0.0302476	0.043064
Effect_size	msp_0205	0.0633343	0.051573	-0.22063	-0.0461114	0.0484111	0.0110733	0.0755843	0.0992603	0.0201507	0.0230765	0.00158529	0.0654543	-0.220285	0.1164	-0.00672155	-0.00501539	-0.260489	0.120462	-0.0697852	-0.270503	-0.272944			0	-0.000181697	0.102145	-0.0150142	0.0398251	-0.143056	-0.256612	-0.334782	-0.115053	-0.180457	-0.0753649	0.0393441	-0.0376632	-0.0378827	0.259595
Effect_size	msp_0206	-0.00183174	0.0616954			0.104158	-0.0376063	-0.0694718	-0.126181	0.211283	0.0291778	0.00357698	0.0280464	-0.428371	-0.386937	-0.0599642	0.0124509	-0.196357	-0.155808	-0.0225201	-0.191978	-0.281325			-0.315908		0.101416		0.0975113	0.0738676		-0.0827234	0.269971		0.00646642	0.00371366	-0.0906138	0.037307	-0.0421654
Effect_size	msp_0207	-0.0808677	0.117041	0.058469	-0.0295645	0.0641902	0.00363919	0.131932	0.03984	0.222696	0.112665	-0.12318	-0.0306813	-0.00981245	0.0168811	-0.0524947	0.075434	-0.0109942	0.0264325	-0.00302979		-0.119463				0.0948756	0.141024	-0.0745555	-0.00431201	-0.115732	-0.0921171		-0.00902809	0.124146	-0.0665849		-0.0402025	0.17873	0.293697
Effect_size	msp_0208	0.0169988	-0.0846742	-0.488306	-0.0902639	-0.128411	0.0944468	-0.120082	-0.0702869	0.00949341	-0.14637	-0.0914483	0.232726	-0.361051	-0.380212	0.3253	-0.0334798	0.187236	0.0147932	-0.00152287	-0.0977467	0.0544712	-1	-0.312313	-0.186871	-0.219403	0.11379	0.0179072	-1	-0.13088	-0.241058	-0.104361	-0.0800944	0.193606	0.191688	-0.0334254	-0.0620661	0.0993261	-0.0057003	-0.173767
Effect_size	msp_0209		-0.0256436	0	0.137845	0.0214869	-0.0253033	-0.0791255			0.0957762	0.0619001		-0.0607715	0.036909	0.0179803	-0.027445		0.0145065	-0.0432534			-0.0190912			0.0194828	0.0417372		0.0358947	0.0555469	-0.00210387		-0.070571	-0.0243529	0.0486953
Effect_size	msp_0210	0.039028	-0.0826799	-0.0989459	-0.00457433	0	0.0899864	-0.0304591	0.196575	0.00322216	-0.0179274	0.0110764	0.0226616	0.0354814	-0.120934	0.055888		-0.0290885	0.114231	0		-0.154037					-0.0345046	0.0288676	0.000433118		-0.0812499		-0.137007	-0.0368531	0.0234731	0.0246875	-0.0254777	0.334161	0
Effect_size	msp_0211		0.0786378					-0.0461628	0.0576338	0.0346313	-0.00683032			0.0258366	0.0885962																						-0.0134238
Effect_size	msp_0212	0.17047	0.0156105	-0.0191293	0.00974199	0.445806	0.0257241	0.175847	-0.167506	-0.0211345	0.00120189	-0.0402111	-0.13447	0.112655	-0.0067087	-0.0932712	-0.0538227	0.0631233	0	-0.0783151	-0.325655	0.171028	0.0597099	-0.162835	0.0178107	-0.0298347	0.111983	-0.0753414	-0.0168851	0.253267	0.0462491	-0.0515722	0.144668	0.0645843	0.105089	0.00169826	-0.018756	0.105609	-0.124343	-0.0173594
Effect_size	msp_0213	0.00810784	0.187635	0.198318	-0.070878	0.272026	0.0456016	0.324097	0.0328363	0.174148	-0.0816331	0.0619049	0.140947	0.575036	0.282981	0.181371	-0.0183064	0.370849	0.0443795	0.0533825	0.256381	0.281451	0.0891413	0.578542	0.408332	0.0738412	-0.038796	0.147842	0.00240531	0.0201226	0.259591	0.343137	-0.0580709	0.164876	0.147007	0.0147181	0.169033	0.255772	0.00129644	-0.154097
Effect_size	msp_0214	0.120772	0.0690478	-0.191977	0.0429764	0.154895	0.0835673	0.0981522	0.220898	0.198527	-0.146573	0.0955335	0.0416481	0.0939067	0.0565656	0.231136		-0.101152		0.00405099	-0.126307	-0.269016	0.0494765		-0.0607516	0.0362929	-0.0123105	1	0.0574708	0.00418107		-0.0044965	-0.00411075	-0.0762511	0.0121174	-0.0336388	-0.0387641	0.230118	0.146053
Effect_size	msp_0215	-0.100707	-0.0256436	-0.0959744			0.00782341	0.125293	-0.0526785	0.0177708	-0.242332	-0.0268485		-0.0573953	-0.0542532	0.000428497	0.0907233	-0.0458488		-0.00775	-0.319527		-0.174361		-0.0850522	-0.062922	-0.0803043	-0.126857	-0.0718082	-0.250706	-0.07871	-0.0258011	0.0167919	0.31526	-0.126288		-0.0308542	0.191459	0.142879
Effect_size	msp_0216	-0.00798119			0.0570407	0.0781388					-0.0597461	0.0249605				0.0228198		-0.0790573	0.0145065			-0.0125124											-0.0722121	0.0638139			0.0636207	0.0787174
Effect_size	msp_0217		0.132903	0.133998				0.0750801		0.0026433	-0.00683032	0.0559435		0.138962	0.0875134		0.0690957			-0.017504										0.11425							0.0259424		-0.0212864
Effect_size	msp_0218	-0.149777	-0.0393265			0.112712	0.0627915	-0.0202069	0.134554	0.00950991	0.0828231	-0.0376928	0.0204573	-0.134466	-0.0407775	-0.00384389		-0.040471		0.0424603		-0.0133731					-0.00915569	-0.00828974	0.000374339				0.064927	-0.0428175	-0.0162552	0.00822916	-0.089052		0.182179
Effect_size	msp_0219						0.0208578						0.11199				0.0707704			0.099558			0.0178879							-0.0449614					0.0104483			0.0593714
Effect_size	msp_0220	-0.059175	0.135476	-0.114748	-0.0608813	-0.0483609		0.0739603	-0.135659	-0.215929	-0.0925223	0.0340777	0.125859	-0.03081	0.165695	-0.0911556	0.0114828	-0.134025	0.0437607	-0.0717858	-0.026581	-0.0456186			-0.259137	0.132547	0.0670678	0.181653	0.135706	-0.0335903	-0.111237	-0.127726	0.147458	-0.0967921	-0.100762		-0.0676649	-0.0217423	0.0858415
Effect_size	msp_0221	-0.100563	0.0541774	-0.0487984	-0.0233975	0.287575	0.251469	0.0331061	0.0192205	0.139659	0.029791	-0.0235061	0.105024	0.156588	0.0419033	0.00602709	0.0725609	0.0138643	-0.0901825	0.0896471	0.0664691	0.0560951	0.114132	0	0.157084		-0.0646174	-0.002626	-0.015987		0.127456	0.319474	0.392613	0.0984502	0.128886	0.131098	0.0128874	0.169987	0.0318265	-0.00208974
Effect_size	msp_0222	0.132075	0.0124575	0.00401591	0.0839571	0.0196256		0.109593	0.17125	-0.0145721	0.173542		-0.0106886	-0.129193	-0.00601937	-0.105453		0.0226738	0.0158595		0	-0.0715078			0.178028						-0.130421	-0.18501	-0.0672613			0.190402	-0.157723	0.0918314	0.0190158
Effect_size	msp_0223	0.0526952	0.0831071		0.0168297	0.096538	-0.0302133	-0.00785535		0.0986787	0.160819	-0.0134694	-0.0115745	-0.192688	-0.225894		0.0148764	-0.111038		-0.0352966	-0.269716	-0.115546			-0.243006	-0.0285182	0.0348537	-0.0487255	0.00755956	-0.090585	-0.111799	-0.323767	0.0393439		-0.0454024		-0.0967358		0.0318265
Effect_size	msp_0224	0.0234891	-0.0152718	-0.133331	-0.0308848	0.237052	-0.129508	-0.0950547	0.0227656	0.0191555	-0.0235897	0.0133429			-0.233042		0.0612206	-0.0935465		-0.0786003		-0.100664	-0.109235			0.170209	-0.0405805	0.106424	0.220079	0.156628	0.140483		-0.232228	-0.123332	-0.0450914	0.20056	-0.00207749	0.187062	-0.000914943
Effect_size	msp_0225	0.0227395	-0.0161503	0.0816094	0.0786134	0.207727	-0.0562721	-0.0165475	-0.0156173	-0.16637	-0.0520523	-0.0262031	-0.00746015	0.17146	0.337582	-0.115507	0.00925332	-0.246799	0.044792	-0.0507007	0.381863	-0.17762	-0.197628	-0.75308	0.238194	0.118343	0.0769046	0.0623017	0.17969	-0.185292	-0.240039	0.171503	0.0155958	-0.249952	-0.125809	-0.019637	-0.0446108	0.0187396	0.197998
Effect_size	msp_0226	0.116381	-0.035603	0.123808	0.114459		0.0236453	-0.0678254	-0.10201	-0.0179249	0.158486	0.0636931	0.231295	-0.0474444	0.0927881	-0.0460095	0.0118465	-0.114637		0.010737	0.164314	-0.18365				0.00354463	0.0546466	0.0248264	0.0258259	0.0336221	-0.0791366	0.0341924	0.224241	-0.105398	-0.0581403	0.0941067	-0.0464481	-0.0848826	-0.190314
Effect_size	msp_0227	0.125215	0.0355067	-0.0951759	-0.0787904	0.0541348	-0.165653	-0.153798	0.0190353	-0.0149438	-0.0357831	-0.0557453	-0.00751086	-0.329931	-0.18666	-0.147336	0.0138661	-0.356352	-0.0710498	-0.154348	-0.301874	-0.273996	-0.228756		-0.471938	-0.0943272	0.00659957	0.00677918	-0.152776	-0.152664	-0.270127	-0.236883	0.235965	-0.0881488	-0.190319	-0.21645	-0.076754	-0.0408458	0.107474
Effect_size	msp_0228				0.0164472		0.0802195					0.00660703	0.159427							0.0738765			0.17169				-0.00435999	-0.00335568	-0.0183335	0.0225221				0.21313	0.0584485			0.0589129
Effect_size	msp_0229	-0.0692813	-0.0118558		0.014381	0.0364272	-0.0387051	0.116027	-0.03984	0.0745124	0.0662123	0.0327487	-0.0071868			0.0400851		-0.0819241		-0.0497237			-0.0230124			0.178225		0.0543787	1					-0.0494436	-0.0481336		0.0451914	0.102804	0.0285341
Effect_size	msp_0230	0.257738	0.0563298	-0.0790677	0.0181904	0.152108	-0.0554957	0.0782651	0.125361	-0.0263902	-0.0155116	0.0368744	0.168804	0.0373039	0.136908	-0.112106	-0.0254837	-0.219075	0.270571	-0.0930117	0.283759	-0.251528			0.267923	-0.0199589	0.000954484	0.0346167	0.0103418	-0.0474375	-0.290695	0.164186	-0.0158038	-0.0486031	-0.0570035	-0.0384213	-0.0322546	0.0883344	0.0931446
Effect_size	msp_0231				0.0109361		0.0795382	-0.076488				0.0126094	-0.00666981				-0.0159029			0.0551698			-0.136105			-0.0757421	-0.0555364	-0.071006	-0.140731	-0.126929				0.0300995	0.186698
Effect_size	msp_0232	-0.185149	-0.0770177	-0.14268	-0.00346732	-0.200815	0.0909423	-0.121502	0.110597	0.137851	-0.139996	-0.0306169	0.184494	0.0352248	-0.130658	0.318571	0.012283	0.0820813	0.126256	0.0336491	0.182735	0.119353	-0.0580714		0		-0.0554188	-0.056687	-0.0799962		-0.0226128	0.106792	0.0699271	0.197356	0.0784808	0.144919	0.153461	0.227319	0.0651577
Effect_size	msp_0233	-0.0797125	0.270112	0.133998	-0.00125492	-0.037662	0.0662675	0.175551		0.18309	0.0429425	0.0328024	0.156363	0.113373	0.118245	-0.0252227	0.0194668	0.178203		0.0274965		0.135243	0.00858272			0.00799529	-0.0830314	-0.0418219	-0.0547068	-0.0234584			0.0941838	-0.0352238	0.122911	0.180092	0.0915668	0.0187705
Effect_size	msp_0234	0.0953387	-0.0693707	-0.1611	-0.0305595	0.120576	0.094353	0.096864	0.152246	0.167071	-0.00300196	-0.0567118	-0.0097663	-0.267798	-0.0297898	0.00769093	0.0654236	-0.0482097		0.0250901	0.00323864	-0.18729				0.00795083	0.0862598	0	-0.00789615		-0.20795	-0.0700502	-0.215306	-0.138457	0.010565	0.21736	-0.0607515	0.17375	0.312409
Effect_size	msp_0235						-0.0967795				-0.00683032		0.0791238				0.0208529			-0.0226467			-0.0576384			-0.0210893	0.0193952	0.0263824	0.0529944	-0.0197669				0.098447	-0.0679508
Effect_size	msp_0236	-0.0295817	0.0223356	-0.257601	-0.0692701	0.0833336	-0.0759661	-0.277995	-0.123494	-0.157596	0.13481	-0.046434	-0.00366121	-0.462912	-0.376958	-0.158777	0.0512152	-0.105296	0.139654	-0.0526369	0.0388131	-0.101936	-0.250789		-0.138861	-0.117664	0.0644601	-0.120893	-0.162101	-0.265518	-0.280271	-0.0480712	0.276732	-0.0648573	0.0173731	-0.159199	0.0529583	-0.119236	-0.0449503
Effect_size	msp_0237	-0.0100559	0.157754	0.0367811		-0.0892693	-0.032992	-0.018996	-0.130406	-0.123786	0.0785747	-0.0518928	0.0828552	-0.122185	-0.0238806	-0.0744896	0.0130642	-0.202228	-0.0209319	-0.113942	0.0212136	-0.372055			-0.0326077	-0.00120306	0.0703566	-0.0590894	-0.0153383	-0.100178	-0.174139	-0.074053	0.00491259	-0.0860465	-0.0642576	-0.238227	-0.139831	0.0482577	0.215593
Effect_size	msp_0238	0.0373461	0.0100068	-0.18844	0.0853671	0.0166116	0.056891	-0.117005	-0.0592821	0.0230902	0.0390553	0.00702503	-0.0112588	-0.264663	-0.169308	-0.176407	0.0869995	-0.154742	0.0596737	0.0380831	-0.236763	-0.182785			-0.358805	0.0200318	0.163277		-0.0186274	-0.0161162	-0.25866	-0.263318	-0.134902	-0.144528	0.000551035	-0.163185	-0.158417	0.0695617	0.313292
Effect_size	msp_0239		0.0490447	0.00294781	-0.0137871		-0.152604	-0.0761432	0.217	-0.0688637	-0.206124	0.00501733	-0.0283648	0.11915	-0.0808275	-0.0442118	0.0347049		-0.0432141	-0.0209199			-0.160973			-0.0248638	-0.141509	-0.0930618	-0.143887	-0.18147	0.0599381		-0.107772	-0.0214946	-0.116595	0.108143	0.00927762	0.0910049	0.0564507
Effect_size	msp_0240		-0.0582681	0.137348				-0.021874	-0.0583735	0.000637183	0.0466766			-0.103883	-0.178256	0.0125407	0.0756349	-0.00262795		0.0524651		0.0511666											0.0663539	-0.0236794	0.0429891		-0.0768445	0.00310792	0.0935634
Effect_size	msp_0241	-0.00798119			0.0276461	-0.0072952	0.000952045				-0.00730792	-0.0352314	-0.0663657			0.06974	-0.00917938			0.0178369			-0.0437945			-0.00624014	0.0284539	-0.132839	0.0755239	0.0268094	0.136109			0.0247241	0.0304723	0.13859	-0.116179	0.0793485
Effect_size	msp_0242		0.128981	0.0288995	0.00982691	0.0775654	0.0779069	0.130824		0.176881	-0.0133762	0.0402993	0.0294787	0.167385	-0.00273608	0.139562	0.0372288	0.117635		0.00476784		0.0655728	0.0707512			0.0503375	-0.00770608	-0.00353747	-0.0389148	-0.0230307	0.126704		-0.069837	0.191772	0.076784		0.0540868	0.178936	-0.0197659	0.047595
Effect_size	msp_0243	-0.147499	0.0286592	-0.16666	0.0473302	-0.174236	-0.0655727	-0.15729	0.114353	-0.0141512	-0.0457848	-0.0467341	0.0772401	-0.166009	-0.135255	0.0295467	0.0142681	-0.0261896	-0.0293046	-0.0880679	0.0737309	-0.195155	-0.0799914		0	-0.0463953	0.0831552	-0.0438487	-0.00108204	-0.014587	-0.0993678	0.0154218	-0.0117468	-0.0720094	-0.118335	-0.0295113	-0.0483372	0.0264004	-0.0412446
Effect_size	msp_0244	0.00822359	0.309014	-0.289507	0.0082314	-0.176051	-0.041243	0.0529746	-0.204673	-0.0215591	0.0223678	-0.00539621	0.0435338	-0.233519	-0.0103128	-0.0134243	0.0423213	-0.0475716	-0.206769	-0.100172	0.143347	0.0130309	-0.250372	-0.18006	-0.106864	-0.0501928	0.0796808	0.122901	-0.11119	-0.147854	-0.19026	0.0570011	0.000663582	-0.000727876	-0.0405872	-0.242056	0.0360058	0.00827965	-0.0659386
Effect_size	msp_0245	0.0310878	-0.0256436		0.0221336			-0.0349522			0.0595242	0.0025052	0.0908764	0.0316391	-0.0577534	0.119483					-0.0582552										0.173544	-0.032548	0.0897127	0.11188
Effect_size	msp_0246	0.130126	-0.122469	0.057087	0.0831735	0.118601	-0.0223495	-0.0419243	0.263515	0.0433735	0.11817	0.0637095	0.214919	-0.0817204	-0.048462	0.0456533	-0.00701618	0.109196		-0.0181792		0.0189936	0.0576931			-0.0730341	-0.0664926	0.0345419	-0.0980931	0.257919	0.267333		0.27231	0.0231379	1		0.062456	0.0171211	-0.0834641
Effect_size	msp_0247	-0.0797125	-0.000610035		0.0575239	-0.0444074	-0.0495559	-0.046715	-0.0319796	-0.102645	0.0248769	0.0426316	0.0672262		-0.0586244	0.033336	-0.0251362	-0.00769238		-0.00369561	-0.199346	0			-0.267307	-0.0158011	0.036936	-0.0469855	-0.00281164	-0.0986865		-0.402288	-0.069837	-0.0520405	-0.0207659	0.15235	-0.113822	0.0748233	0.0723726
Effect_size	msp_0248
Effect_size	msp_0249	0.0588137	0.000346125	0.0915656	-0.0775717	0.255507	0.0641478	0.0183997	-0.0576479	-0.0422208	0.123977	-0.0400726	0.0808868	-0.00527038	0.180976	0.0712682	0.0386661	-0.137718	0.0705448	0.0433385	0.0390155	-0.0867873	-0.182577		-0.284972	-0.00551264	0.172949	-0.0512483	-0.0393859	-0.139574	-0.220371	-0.0942415	-0.0507784	-0.202551	-0.0157863	0.0540455	0.0397716	0.107253	0.140824
Effect_size	msp_0250	-0.129518	0.232173	-0.010559	-0.0822703	-0.0249664	-0.0199271	0.0164877	0.0622963	-0.126286	0.149483	-0.0638517	-0.0467798	-0.123371	-0.0995695	-0.0594938	0.00139794	-0.293157	0.242728	-0.0548619	-0.0553966	-0.302203	-0.164477		-0.12706	-0.0610676	0.104831	0.031488	-0.0292877	-0.0350716	-0.117529	-0.132103	0.112549	-0.111078	-0.0247045	-0.029508	-0.114586	0.0303633	-0.0428778
Effect_size	msp_0251	-0.0446492	-0.063066	0.0530094	0.0204145			-0.0746102	-0.0163461	-0.0177713	0.084447	-0.0590817			-0.154763	-0.000138837	0.00714032			-0.0293263						-0.00512371	0.0241097	-0.0073771	-0.0273616	0.0400369			0.0303619	-0.0359732	-0.0607213		0.0505301	0.0332573	0.0194339
Effect_size	msp_0252	0.0462101	0.051853	0		0.00800278		0.0755739	-0.0472824	0.0430306	0.0621994	0.00660703	-0.00817996	-0.186473	-0.101549			-0.117538		-0.00675462		-0.00375371					0.107925	0.0143717	0.064186	0.00622398			-0.0738533				0.0512235		0.0782403
Effect_size	msp_0253								0.181527	-0.0294735		0.00357698	0.0772354			0.192445																					0.00947267
Effect_size	msp_0254	-0.0329803	-0.0140271	0.0648517	0.11258	0.0822591	0.0952077	-0.0324109	-0.0918264	0.072193	-0.00499659	0.0503546	0.109703	-0.0987356	-0.0996065	0.108403	0.0172099	0.139083	0	0.0132514	-0.0903912	-0.039821		-0.048795	-0.0287617		0.0705929	0.0107564	-0.0174451	0.0139917	-0.00472484	0.0066228	0.198386	0.208592	0.136736	0.205729	0.155147	0.144713	0.000809263
Effect_size	msp_0255		0.0443469	-0.0989459	0.0593345	0.0214869		0.0591884	0	0.0757731	0.0543658	0.0295982		0.0527556	0.0640242					-0.000162533		-0.046016											-0.0181429		0.0201477		-0.00292769		0.0466879
Effect_size	msp_0256	0.0199146	0.13899			0.0214869			0.195715		0.0908008	-0.0131859			-0.00106727				0	0.0184272		-0.046016											0.0102513	0.0414329	0.03233		0.0213777
Effect_size	msp_0257		0.0241481		0.0808324		0.0738716	-0.024145	0.00750623	-0.0972625	0.086071	0.0103382			-0.0032018	0.00511553			0.102207	-0.0217019			0.00563394							-0.026032			-0.0150156	-0.0311418	0.0160993		0.0489911	0.118369	0.102352
Effect_size	msp_0258	-0.0313234	0.0710122	0.018543	-0.00965004	0.245934	0.0758978	0.166336	0.0962254	0.108043	0.288268	0.0680349	0.124591	-0.185449	0.031854	-0.0937669	0.0791581	0.0411532	-0.0822016	-0.0938717	0.0916889	0.0766308	-0.217532	-0.18006	0.0263273	-0.012071	-0.118654	-0.0356527	0.0333591	-0.102088	-0.0664041	-0.00257787	0.116161	-0.0257173	-0.0676938	-0.0138183	0.0270989	-0.0581181	0.073676	-0.0517375
Effect_size	msp_0259	0.0334663	0.0641273	-0.317033	0.0201592	-0.17786	0.0328086	-0.168451	-0.020889	-0.0712659	0.0241997	0.0644357	0.160907	-0.617758	-0.528471	0.0394515	0.0235543	0.0259296	0.0888268	-0.0903738	0.0387308	0.0791774	-0.236881	-0.578542	-0.135957	-0.103994	0.121436	-0.0380818	-0.149135	-1	-0.337476	-0.0509437	0.161584	0.187819	-0.00118583	0.0621553	-0.00903528	-0.0947786	-0.226463	-0.128332
Effect_size	msp_0260	0.177226	-0.0200304	0.0220735	0.0372723	0.149363	0.0109862	-0.0922008	0.103933	0.02243	0.055915	-0.052431	0.0435425	-0.150321	0.0958309	0.012231	-0.00320711			-0.0247795		-0.0911162	-0.0394324				-0.0363283	-0.0210552	-0.0375292	-0.0383955			0.112203		0.0106092	0.123607	0.101336
Effect_size	msp_0261				0.0593345		0.0368745					0.00357698	0.181566			-0.00516938				-0.026391						0.207583				0.0585026				-0.0421392	-0.0115209		-0.0750426	0.164595	0
Effect_size	msp_0262	-0.00188186	0.204538	0.0132971	0.101013	-0.0997475	-0.090767	-0.00448952	-0.0709253	-0.0360947	0.0194991	0.0565328	-0.0156884	-0.189136	0.025613	-0.116257	0.00969771	0.166864	0.127304	-0.122754	0.10421	0.0796926	-0.163941		0.136139	0.000406478	0.0705612	-0.0279555	-0.0587496	-0.144468	-0.148325	0.0444742	0.145212	-0.0799276	-0.0567047	0.132783	0.00804068	-0.00678817	-0.0896732
Effect_size	msp_0263	-0.13629	-0.00670922	-0.284713	-0.0307496	-0.0144131	0.171669	-0.0182635	-0.0875707	-0.203017	-0.181515	-0.020286	-0.0522721	-0.401715	-0.190545	-0.0037395	0.0279496	0.184319	-0.0872797	-0.0940137	0.031648	0.0386014	-0.147563	-0.236682	-0.0426312	-0.0371781	0.0220133	-0.0787241	-0.00679203	-0.220052	-0.149733	-0.00674684	-0.138568	0.0974473	-0.0613358	0.119555	-0.0448431	-0.141655	-0.00417839	-0.0545017
Effect_size	msp_0264		-0.126347			-0.0072952		-0.181825	0.0886129	-0.0957888		-0.0376928	-0.0069215					0.0157546		-0.0407651	-0.244672	0.132169				0.0607455	-0.03264		-0.0216024		0.0330787	-0.269061		-0.0307677	-0.0474782	0.16294	0.0212334		-0.0197659
Effect_size	msp_0265	-0.0527317	-0.106508	-0.0129294	-0.00926887	0.0293159	-0.0666802	-0.124482	-0.198507	-0.1262	-0.0818792	-0.0587399	-0.0123124	-0.321852	-0.232543		-0.0194105	-0.138749	0.0267099	-0.105196		-0.120957				0.0689888	0.172823	-0.0210161	-0.0799375	-0.0539237	-0.113554		-0.042884	-0.0363284	-0.100224		-0.161372		-0.18561
Effect_size	msp_0266				0.0877605		0.00253445	0.0171439			-0.00455355	0.0689711	0.0538682		0.0463778	0.135269	-0.0168232			0.0319952			0.270444				-0.0347566	-0.0311755	-0.0498176	0.215142	0.0478705		-0.0150156	0.253599	0.0390174
Effect_size	msp_0267	0.0293113	0.0461167		0.00475742	0.0810578	0.0616793					0.0325592	-0.0350641	-0.0900234		-0.0236185		-0.0434357		0.0428849		0.094968	0.0138512					0.0949537	0	0.0538453			-0.0170177	-0.0610553	0.0326419		0.0636207	0.0712558	0.0714613
Effect_size	msp_0268							0.0515688	0.101025	0.0764023		0.0229296	0.0507606			0.113809				0.035021														0.106044			0.0451914	0.117168	0.147969
Effect_size	msp_0269	-0.0127699	-0.0507872		0.0382032	0.0726068	-0.0550823	-0.138916	-0.109753	-0.110158		0.0330886	-0.0410782				0.0206546	0.011761	0	-0.0671848		0.206707				0.0747422	0.143832	0.0271205	0.0169163	-0.112109	-0.064187			-0.055303	-0.108845	0.234299	-0.0960641	0.0691111	0.0433349
Effect_size	msp_0270	0.0270935	0.120168	-0.216664	0.0448276	0.0699066	0.0716474	0.0952597	0.042192	0.0713422	0.126854	-0.0683254	0.000601472	-0.165942	0.10264	0.0712778	0.100783	-0.278108	0.13338	-0.0114877	0.129561	-0.342887			-0.261806	-0.011939	0.119977	-0.0771822	0.0247017	-0.112004	-0.209899	-0.166371	-0.106546	-0.0643741	-0.046536	0.165764	0.0130238	0.109922	0.007773
Effect_size	msp_0271	-0.124808	0.209048	0.0318821	-0.0726963	0.195065	0.208631	0.0494854	-0.0320212	0.225922	0.0983485	0.0243168	0.11061	-0.21137	-0.0744745	0.148262	0.0281366	-0.0340465	0.27771	-0.0614906	0.0530023	-0.0227292	-0.182846		0.213729	0.0164094	0.146533	0.019395	-0.0525941	-0.135927	-0.301116	0.0363157	0.148105	0.124472	0.0564847	0.159856	0.162404	0.0297041	0.143167
Effect_size	msp_0272	-0.18736	0.073613	0.0220735		-0.100425		0.016616	-0.0714126	-0.116775	0.114655	0.0294155	-0.0175424	-0.131313	0.0573459	-0.0344021		-0.22871	-0.0391581			-0.0648191									-0.111555		0.0245614	-0.0739727			-0.168998		0.0517338
Effect_size	msp_0273		0.0802549				0.00016312	-0.0349522		0.0454081		-0.0199148	0.0409572	-0.0590834			0.0513713			0.0273746		0.0678736				0.228935	-0.0327916		0.143607					-0.0530802	-0.0615211		-0.0340419		0.0712461
Effect_size	msp_0274	-0.205618	-0.0452733	-0.126483	0.0123922	-0.0323527	0.13851	-0.00692229	0.168618	0.193358	-0.0154405	-0.0531326	0.142655	0.17995	-0.218184	0.254935	0.0223629	0.140907	0.273673	0.0412623	0.00323864	0.0548174	-0.0452617	0.170103	0.0819811	-0.0217416	0.0100035	0.0150541	-0.116313	-0.105983	0.211336	0.128964	-0.0785134	0.100085	0.231687		0.0424446	0.21696	-0.0666225
Effect_size	msp_0275		-0.00638391		0.031502		-0.0928615	-0.118035	0.0576338	-0.0397321	0.170407	0.0721444	-0.0247925	-0.0983491	-0.0951232	-0.0422774	-0.0381961		-0.0901825	-0.105982			-0.0860923			0.220897	-0.125597	0.0474487	0.29007	0.220555			0.121555	-0.0596938	-0.239133		-0.0640636	0.0365463
Effect_size	msp_0276	0.0121734	-0.100319	-0.0646469	0.011958	0.115744	0.234936	0.201168	0.0678306	-0.0066871	0.0335485	-0.00156988	0.065784	0.269567	-0.00601937	0.0687423	0.0688688	0.0839205	0.200887	0.0451861		-0.0451552	0.0271765				0.0352065	0.0364344	0.0123223	-0.00424304	-0.0671536		-0.255307	0.0527647	-0.0222653		0.0160438	0.186501	0.0244199
Effect_size	msp_0277	-0.172631	-0.00860178	-0.179941	-0.00665258	-0.111104	-0.0107945	-0.0731781	-0.246458	-0.094953	-0.0162037	0.0167728	-0.00396736	-0.25615	-0.0121516	-0.0677392	0.0152545	-0.0479484	0.0419194	-0.0414506	-0.123698	-0.019546	-0.149254		0.153396	-0.002116	0.162196	-0.0756509	-0.0118719	-0.0386814	-0.229632	0.0274373	0.111138	0.120362	0.170225	0.330995	0.00656411	-0.0128995	-0.15511
Effect_size	msp_0278	0.157021	-0.0604894	0	-0.0516949	0.0726406	0.0799946	-0.122977	0.153607	0.114486	0.0883131	-0.0170625	0.0214465	-0.115874	-0.245118	0.267558	0.0311817	0.197043		0.102752	-0.0427205	0.131853	-0.0124392	0.170103	0.109308	-0.0366609	-0.0256194	0.0326053	-0.0616947	-0.00401236	-0.0955563	-0.00161264	0.114525	0.096211	0.255165	0.101384	-0.022697	0.052464
Effect_size	msp_0279	0.199092	-0.0102479	0.0831956	0.0490689	0.0214869	0.150736	-0.0137856	0.0169591	0.101544	0.144976	0.110177	0.150246	-0.160679	0.078872	0.0731026	0.021767	-0.151766		0.0327412		-0.163161	-0.048666			-0.0857502	-0.116936	-0.126288	-0.113684	-0.143977			-0.0249719	-0.0691606	0.0539906		-0.148498	0.0274245	0.0702086
Effect_size	msp_0280	-0.0247285	0.0144994		0.11432	0.154052	0.0548794	-0.0162595	-0.0275314	-0.0127399	0.148604	0.101286	0.183838	-0.124014	-0.016525	-0.0909304	-0.0209147	-0.110347	0.0866053	-0.0311338	0.0201956	0.128615	-0.0199014			0.155696	-0.09046	-0.0819377	0.0772956	0.0320733	-0.0365043	0.0394352	0.283241	0.00625824	-0.0662026	0.0673181	-0.0519248	0.0270636	-0.0473899
Effect_size	msp_0281	0.000874667	0.128078	0.0539597	0.0827077	0.182627	0.136757	0.0497133	-0.0959189	-0.117154	0.0869287	0.0813909	0.0257125	-0.184811	-0.0716682	-0.0366334	0.0163765	-0.087898	0.00890331	-0.0792702	0.123089	-0.0153139	-0.0196928	0.170103	0.109308	-0.0050663	-0.0510974	-0.0102921	-0.0342805	-0.0578024	-0.052791	0.131096	0.25561	0.132333	-0.076461	0.010437	0.0665417	0.00717962	-0.0905024
Effect_size	msp_0282	0.0697201	-0.102143	0		0.0815073	-0.00252409	0.0681582	0.158407	0.126212	0.0291778	0.000777515	0.0820808	-0.13183	-0.0454378	-0.0407224	0.0236896	-0.172577		0.0454782	-0.221227	-0.0125124			-0.178615	0.0124496	0.0424926	-0.0139284	0.0630156	-0.0453622	0.0273213	-0.142403	0.174836	-0.0842461			0.0690671		0.0958738
Effect_size	msp_0285	0.0556173	-0.0526144	-0.000644555	-0.00694501	0.214112	-0.0629811	-0.189376	0.103669	-0.128293	0.0275506	0.0343856	-0.0555633	-0.207267	-0.17723	0.0984099	0.0485014	-0.0436516	-0.218781	-0.125646	0.235655	-0.226092	-0.159435	0	0.191745	0.00603317	0.013546	-0.11248	0.0647087	-0.0935373	-0.297082	0.127488	0.0998518	0.101343	0.0734904	-0.135791	0.0537955	0.105192	0.0529001
Effect_size	msp_0286	0.153866	-0.0554934	0.195583	-0.0233916	0.218134	0.0274606	0.196508	0.0161358	0.0807225	0.115252	-0.0640664	0.0437159	0.0355701	0.205024	0.085153	0.112076	-0.0658448	0.0445166	0.0660887	-0.145739	-0.0047779					-0.0121566			0.00392178		-0.204087	0.0929024	-0.14181	0.0116027	0.0306241	-0.0228721	0.0660729	0.197623
Effect_size	msp_0287	0.0409139	0.182295	0.0449831	0.0795348	0.232621	-0.00331646	0.163272	-0.102971	0.0493982	0.120079	0.0484924	0.105874	0.159824	0.285166	-0.086873	0.0768555	-0.1108	0.200028	-0.057616	0.13677	-0.0986835	-0.137759	-0.279715	-0.146338	0.185442	0.170403	0.0336878	0.0992582	-0.1546	-0.246922	0.0532089	0.13759	-0.178777	-0.0842391	-0.117313	0.0514786	0.0462155	0.249072
Effect_size	msp_0288	0.039028	0.181391	-0.0783103	-0.049597	0.081259	0.0316666	0.0791395	0.0210172	0.0251676	-0.103015	0.0214731	0.0186467	0.0967741	0.0643678	0.0256769	-0.0204866	-0.128154		-0.00146483		-0.093107	-0.0476559			0.0593141	-0.128007	0.13655	0.0315289	0.121605	0.00654825		0.0553162	-0.111232	0.0850355	0.0639465	0.0918004	0.151555	-0.0372047
Effect_size	msp_0289				-0.0494804		0.0996955					0.0307283					-0.0357948			0.0703759			0.234858			-0.0545009	-0.106754	-0.117995	-0.110905	0.102512				0.0291159	0.17931			0.120258
Effect_size	msp_0290	0.153827	-0.115512	0.062953	-0.0170251	0.274475	0.0874738	0.0402947	-0.18129	0.0400394	0.0543095	-0.0624691	0.0499008	-0.211115	-0.189646	-0.00207327	0.0357858	-0.0601349		-0.0869684	-0.0843196	-0.000446579	-0.0821722		0	0.0114622	0.0169483	-0.0656531	-0.0270183	0.0214404	-0.176368	0.0294417	0.10919	-0.0811127	-0.0748574	0.370478	-0.0750479	0.105876	-0.0789472
Effect_size	msp_0291	0.0800551	0.121987	-0.191701	-0.0591313	0.184924	0.056347	-0.0543322	-0.1714	-0.268555	-0.0803369	0.0216296	0.0109249	-0.39828	-0.0711912	0.187773	0.0100496	-0.0414297	0.210385	-0.0837823	0.182677	-0.163518	-0.156895		-0.222527	0.0220455	0.131911	-0.0353703	-0.046487	-0.176671	-0.356692	-0.0516921	-0.0690885	-0.0379264	-0.105964	-0.011428	-0.0132429	-0.0599965	-0.13952
Effect_size	msp_0292	-0.0255921	0.125174	0.160637	0.0344013	0.267648		0.251305	-0.0180667	0.25887	0.0976127	0.00530549	0.15381	0.240468	-0.00313285	0.0839928		0.162516		0.0668621	-0.155995	0.0151715		0.170103			0.104221				-0.0996222	-0.130132	-0.103938	0.0415108	0.0299231	0.094625	0.0784901	0.147878	0.127878
Effect_size	msp_0293				0.0598739		0.023394					0.00380054	0.091389				-0.0159598		0.102207	-0.0888209			-0.018891			0.0209397	-0.0902682	0.0206853	-0.0629665	0.0448636					0.0236057		0.0217447
Effect_size	msp_0294	0.0157568	-0.0155863	0.0341539		0.0141588		-0.0532686	-0.0569498	0.107416	0.130284	-0.037376	-0.0490837	-0.217509	-0.0963327	0.00415976		-0.0586514	0.0158595	-0.0432624		-0.130418					0.0706195			0.0331237			0.116983	-0.0817897	-0.032017	0.23258	-0.0035923	0.269389	0.067178
Effect_size	msp_0295		-0.00273596	-0.0379489	0.0232556	0.0214869	0.147283	0.014787		-0.0166701	0.0211454	-0.0537837	-0.0739845	0.173232	0.227689	-0.00057133	-0.00962323	-0.17419		0.0658098	-0.102071	-0.0794148	-0.0249909			-0.0199482	0.0209352	-0.047381	-0.0311732	-0.0888163				-0.0947135	0.136104		-0.152491	0.125473	0.0633631
Effect_size	msp_0296	0.0234249	0.056971	-0.370003	0.0626788	0.00327794	0.0308136	0.044814	-0.00167581	-0.0662235	-0.00231094	0.00727863	-0.049244	-0.179221	-0.0970449	0.158231	0.0804365	-0.115944	-0.00937633	-0.0632005	-0.163494	-0.284636			-0.486013	-0.0990378	0.161461	-0.0627272	-0.0912476	-0.142525	-0.418543	-0.269224	0.0952606	-0.0182887	-0.0195991	-0.103945	-0.0158487	0.164254	0.134473
Effect_size	msp_0297	0.076933	0.147634	0.172803	-0.0225615	0.243536	0.0403025	0.242094	0.225864	0.235314	0.130305	-0.00502557	0.144733	-0.0243727	0.215072	0.191535	0.0760551	0.0761572	0	0.0248231	0.148943	0.0542778	-0.0359213				0.0441709	-0.0459244	-0.0519566	-0.0583627	-0.142475	0.0378536	-0.0834219	-0.126963	0.0407723	0.064925	-0.0336605	0.0853575	0.36199
Effect_size	msp_0298	0.123378	0.0121715	-0.0735623	0.00376854	0.0180215	0.109472	-0.169148	0.0984103	-0.151539	0.163137	-0.0518928	0.0197161	-0.353405	-0.10112	-0.063768	0.112433	-0.0447123		0.0931665		-0.0904834				0.0362929		-0.0118346	-0.00291385	-0.0202627	-0.164414		0.0540247	-0.110812	0.0405562	0.0983712	-0.174175	0.0968922	0.139623
Effect_size	msp_0299	0.0147889	0.0137305	-0.306498	0.0336647	-0.00975546	-0.0435728	-0.0711747	-0.101187	0.00168186	0.0114522	0.0562208	0.0528424	-0.520922	-0.339177	-0.0308183	0.0323369	0.110421	-0.00599329	-0.0567542	0.153294	0.0981038	-0.198526	0	-0.0516488	-0.0544459	0.130765	-0.0357052	-0.0849944	-0.137454	-0.234269	-0.0142588	0.0541482	-0.037299	-0.111567	-0.093276	0.0050957	-0.163043	-0.124302	-0.118291
Effect_size	msp_0300	0.110046	-0.102145	0.140698	0.125732	0.112428	-0.0422898	-0.141871	0	-0.0318592	0.211377	0.0417797	0.0410579		-0.226772	-0.0527413		-0.0819241	0	-0.0805008		-0.0871111					-0.0705427	-0.0539464	0.0538306	-0.0298877			0.116857	-0.0752597	-0.0814128	0.13859	0.0791237	0.116042	-0.0998693	0.0664319
Effect_size	msp_0301	0.107626	0.113181	0.026838	-0.0269003	0.158408	-0.0280972	0.0029014	-0.112403	-0.28451	-0.11624	0.00688861	0.0127384	-0.252215	0.101729	-0.0599516	0.0310965	0.028839	-0.00296089	-0.131326	0.275191	0.0484326	-0.224697	-0.451848	0.459374	0.00579217	0.0369604	0.124059	-0.0490402	-0.111498	-0.276079	0.295079	-0.104072	-0.176118	-0.0715542	-0.0669352	0.0774569	-0.0942299	-0.24929	-0.150633
Effect_size	msp_0302	0.00581317	0.0499695		0.0597204	0.0674706	-0.075356	-0.165482	-0.0918516	-0.112569	0.084447	-0.062901	-0.0344748	-0.179556	-0.169511	-0.0208801	0.0659156	-0.0891192		-0.0548751	-0.0830949	0.0465151	-0.10816		-0.136635		-0.0324532	-0.0442915	-0.0408396	-0.134183	0.00431226	-0.20041	0.0954652	-0.0601799	0.0141503		-0.00665321		0.0515979
Effect_size	msp_0303	0.265798	0.0594305	-0.101663	-0.0483954	0.170148	0.092815	0.11071	0.187149	0.060556	0.0514682	-0.0256956	0.00302501	0.111282	0.194685	0.00263835	0.0334043	0.0518423	-0.0376774	-0.0465497	-0.0451041	-0.113812			-0.0209445	-0.0112431	-0.0241113	0.0355522	-0.0563536	-0.0527696	-0.25939	-0.114089	-0.195113	-0.179093	0.0185392	-0.228746	-0.0855907	0.0468459	0.261482
Effect_size	msp_0304	-0.040871	0.132903	0.00334995	0.0276949			0.161288	-0.0379426	-0.046635	-0.0597461	0.00132178	0.191678		0.0875134	0.000971862						0.0130166					0.0717432		0.0174361		-0.0923482	-0.0956168	0.0140955		-0.0172563		0.00270347	-0.00912074	-0.0928951
Effect_size	msp_0305	0.0309047	0.0274726		0.00689354	-0.146106	-0.122521	-0.208142	-0.0218694	-0.0106148	-0.00683032	-0.0975979	0.0461651	-0.276807	-0.24929	-0.099445	0.0109196	-0.0112901	-0.0661338	-0.0485736	-0.507165	0.0547688			-0.378738		0.0903169	0.010908	-0.00680881	0.0365266		-0.500362	0.091621	-0.118757	-0.0771338		-0.17564	-0.00346081	0.0585564
Effect_size	msp_0306	0.190407	0.0315839	-0.0551384	0.0170027	0.163239	0.0656172	-0.069968	-0.135375	-0.143858	-0.0380088	-0.0124985	0.0566903	-0.335939	0.0430906	-0.0662798	0.00881079	-0.17504	0.154954	-0.0470254	-0.173334	-0.160061	-0.115189		-0.435635	-0.000535821	0.0885344	-0.00501645	0.0263145	-0.103579	-0.348377	-0.292349	-0.126126	-0.0833418	-0.0786659	0.15236	-0.0565193	0.11281	0.0993866	-0.050491
Effect_size	msp_0307	-0.0340538	0.170653	-0.277539	0.0336969	0.0273447	-0.0138094	-0.019529	-0.153375	-0.0631853	-0.0101389	0.106076	0.143574	-0.375671	-0.228352	0.06752	-0.0276905	0.175153	-0.219106	-0.0991688	-0.0203307	0.15628	-0.160208	-0.278557	-0.306249	-0.0507028	0.20456	0.000523057	-0.0266884	-0.192925	-0.372211	-0.0392579	0.217169	0.0898433	-0.117987	0.0963651	0.0306568	-0.139746	-0.0912847	-0.0959322
Effect_size	msp_0308	-0.0043851	0.0800902	0.0184555	0.0382829	0.321577	0.0575722	0.0660471	-0.0788403	-0.163771	-0.0665243	0.000178153	0.120671	-0.00705254	0.0601343	0.112601	-0.030542	0.275767	-0.0190543	0.0116666	-0.301485	0.135555	-0.0635641	0	0	-0.0224027	-0.0875962	0.0520905	-0.0898478	-0.0336976	-0.0270628	-0.204016	0.0887515	-0.0236809	0.0652362	0.225055	0.0400393	0.141927	-0.188116
Effect_size	msp_0309	0.111989	-0.0724091	-0.0735623	0.0205766	0.368035	0.039077	-0.0599283		0.0901742	-0.135677	0.00338395	-0.0416216	-0.0812436	-0.076063	-0.0762402	0.0301222		-0.0901825	-0.0536708			-0.0753781			-0.0218695	-0.0128221	0.00762078	-0.0738889	0.0593157	0.0914212		0.0254228	-0.00409623	-0.00234025		-0.0874279	0.0468959	0.0311514
Effect_size	msp_0310											0.00357698		0.0438905	0.049878		0.0945285						0.0464337												-0.00450786		-0.074628
Effect_size	msp_0311		0.0802549	0.057087		0.197004		0.0240235	0.221434	0.0637409	-0.00455355		-0.0285195	-0.0110092	0.034175	-0.014058		-0.0114992				-0.100664												-0.0530802			-0.169713	-0.0235326	0.0311514
Effect_size	msp_0312	0.082529	0.118024	-0.103778	-0.0325963	-0.033634	0.025483	-0.0182096	-0.0861681	-0.0732828	0.0472735	-0.0300685	-0.0143257	-0.382788	-0.086484	-0.1299	0.0528659	-0.202108	0.317336	-0.0652587	-0.157731	-0.182131			-0.157964	-0.010009	0.147496	-0.0581386	0.00113853	-0.206522	-0.353464	-0.207885	0.00978733	-0.19495	-0.0269978	-0.107399	-0.0440837	-0.0858081	0.214543
Effect_size	msp_0313	0.0161507	-0.0445728	0.102023	0.0664728	0.120699	0.052371	0.0432741	0.0156477	0.0820143	-0.0831894	0.0564997	0.0946277	0.212088	0.105282	-0.0259153	-0.0580637	-0.134925	0.00316232	-0.0325212	0.0707309	0.0131068	0.161205	0	0.148766	-0.086796	-0.0201209	-0.0587545	-0.203604	1	0.46318	-0.00292052	0.0231374	0.139846	0.176833	-0.195863	-0.0866455	-0.0707863	-0.0345362	0.162763
Effect_size	msp_0314	0.191996	0.045716	0.011253	-0.0379793	0.150434	0.192233	0.212306	0.19732	0.138888	0.173813	-0.00211182	0.135642	-0.0577809	0.160918	0.0942198	0.152641	-0.048752	0.149153	0.0195102	0.131524	-0.182266		-0.130677	0	-0.0212241	0.0914799	0.00304437	-0.0329349	-0.11193	-0.339664	-0.0639331	-0.150893	-0.151445	0.039114	-0.159261	0.019389	0.104852	0.315544
Effect_size	msp_0315	0	0.0964009	-0.103644	-0.0172011	0.0563564	0.145342	0.0168988	0.110171	-0.00348368	0.148852	0.0197697	0.0662483	-0.114416	-0.0939026	0.0744633	0.0686986	0.06129	0.209597	0.0838311	-0.198621	-0.0396043		-0.282076	-0.0702062	-0.0297232	0.113296	0.0609826	-0.0404765	-0.0513311	-0.177733	-0.243882	-0.117557	-0.023091	0.0565521	-0.147054	-0.0329099	0.109331	0.0237467	-0.0476807
Effect_size	msp_0316				0.0172122		0.000662849	-0.15016	0.0886129	-0.095052		-0.0131859		-0.13183	-0.00711381		0.0343295			0.0584418	-0.102071					-0.00531304	-0.000817301	-0.00187698	0.0164701	-0.0228514		-0.104511	0.0128141		0.008918			0.0297283	-0.0197659
Effect_size	msp_0317	0.260157	0.0785483	-0.0128774	0.0148456	0.270555	0.13044	0.241614	0.318231	0.257445	0.145869	0.0259513	0.141565	0.103636	0.239565	0.0780698	0.0642075	0.0300969		0.0331528	0.0366552	0.0167349			0.157084	0.014395	0.0894907	-0.0127925	-0.0577171	-0.0803589	-0.20491	-0.0342131	-0.165147	-0.166432	0.0535536	0.00193564	0.0268988	0.0771274	0.231588
Effect_size	msp_0318	0.20313	-0.15792	-0.0274413	0.0804683	0.148364	0.115803	-0.0113291	0.119752	0.0778126	0.081749	0.112765	0.0542342	-0.00885013	0.147123	0.0350514	0.0500658	-0.117336	-0.102573	0.07433	0.120557	-0.215028	-0.105324	-0.506259	-0.267161	0.0737021	-0.0659966	-0.12775	0.0289743	-0.22394	-0.309742	-0.0575724	0.00494303	-0.147805	-0.0367812	0.138511	-0.106766	0.00879841	0.134274	-0.0557014
Effect_size	msp_0319	0.0274761	-0.0609548	0.146141	-0.00139768	0.00334143	0.0330686	-0.155523	-0.174202	-0.070373	0.182367	-0.0100088	0.0142515	-0.312738	-0.184987	-0.0538158	0.0329748	-0.0669872	0	-0.0100767	0.084654	-0.0228961			0	0.0103	0.0640785	-0.0242121	0.0118486	-0.0864658	-0.120062	-0.0359741	0.0490127	-0.0533181	-0.0647251	0.0765985	-0.176901	-0.0601924	0.0428233
Effect_size	msp_0320		0.208552					0.0466109			-0.00683032	0.00498875		-0.0514135				-0.0283291				-0.0891136														0.287255	-0.000211715
Effect_size	msp_0321	0.0776119				-0.00405289				-0.117364			-0.0303598					0.0284026				-0.0499718							0.0856694							0.153945	-0.0849275	0.0779331
Effect_size	msp_0322	-0.00404339	-0.184841	0.137348	0.0906349	0.126864	0.0321758	-0.118229	-0.00275504	-0.0725851	0.144463	0.0430447	0.0175774	-0.229043	-0.0788018	-0.0358242	-0.0292152	0.0585468	-0.137449	-0.00574604		0.0883615				-0.0404042	-0.00839491	-0.0509216	-0.0513791	0.0144245			0.157382	-0.00323336	-0.0233648		0.0155397		0.0338336
Effect_size	msp_0323	0.0336699			-0.050556			0.00205699	-0.0597973	-0.107598	-0.00683032	-0.0775235	-0.0516166	-0.0573953	-0.000760986	-0.00136065		-0.202999				-0.17598					-0.0153113	-0.0143713		-0.022688			0.0287207	-0.0794905	0.0212159	-0.0809755	-0.0968066	0.0408513	-0.0852521
Effect_size	msp_0324	-0.125099	-0.097363	-0.0365988	0.0943273	-0.0687723	0.0287638	-0.061916	-0.00981758	0.0804228	-0.0259168	0.0690279	0.0796518	-0.172366	-0.0562325	-0.130223	0.0670861	-0.118086	0.230251	-0.0798095	0.0277413	-0.113782	-0.194015			0.0466286	-0.0579959	-0.135654	-0.00332378	-0.205775	-0.138747	-0.0382685	-0.0196355	-0.0751993	-0.0798258	0.08625	-0.0377451	-0.0992333	0.0555276
Effect_size	msp_0325	0.02624	-0.128309	-0.206104	-0.0444428	0.191478	-0.00722958	-0.201055	-0.153607	-0.00962773	0.0558582	-0.0481754	-0.0390486	-0.15224	-0.152501	-0.0458168	0.0075517	-0.108048	0.0356133	-0.0163047	-0.0273077	-0.111573	-0.126778		-0.163962	-0.0201621	0.0362503	-0.0270272	0.0497159	-0.0436088		-0.0689011	-0.18751	0.029767	-0.0302013	-0.0192221	0.0121045	0.0408153	-0.0280152
Effect_size	msp_0326						0.0321488		0.0600352	-0.0387861		0.0255211	-0.0266252			0.0291337	-0.00285441			-0.0249067						-0.04045	-0.068189	-0.0650324	-0.043313	-0.116566	-0.0210619				0.0145853			0.050277	0.0311514
Effect_size	msp_0327	0.0275349	-0.0279748	0.057087		0.0778154		0.0259077	0.0281993	0.0331891			0.155272		0.035542			0.121836			-0.166753	0.146713			0						-0.049503			-0.0210325			0.118863	0.167414	0
Effect_size	msp_0328	-0.028586	0.179662		0.0598739	0.0761943		0.134726	-0.0644447	-0.0276113	-0.0829739	0.00380054		0.0836701	0.148497	0.0128503		-0.152507				-0.109885									0.00334147		-0.180277	0.0101		0.0840264	-0.0477786	0.00480315	-0.102064
Effect_size	msp_0329		0.0241481				-0.00640204	0.0197814		0.0463541		0.045886	0.091725			0.113536				-0.0506733			0.118984				0.0193607			0.0937697				0.0132497	0.0243454		-0.0105173
Effect_size	msp_0330	-0.028586	0.0839029			0.0315717		0.00102849	0.145174	0.0383155								-0.122759				-0.124211															-0.118687	0.11342	0.107505
Effect_size	msp_0331	0.0743585	0.108673	0.0795478	-0.0274524	0.337647	0.00813431	0.211195	-0.0802331	-0.00250368	-0.0369659	0.00185193	0.0697134	0.466917	0.439613	0.111523	0.0522916	0.275093	-0.0651397	0.0120804	0.307994	0.221607	-0.220001	0.0209249	0.373741	0.127733	0.0717253	0.187598	0.069031	-0.191022	-0.0459752	0.314751	-0.121972	-0.164043	-0.081412	0.287226	0.164522	0.241995	0.0772127	-0.193928
Effect_size	msp_0332
Effect_size	msp_0333		-0.0750343			0.018959	-0.0594827	-0.225286		-0.0826597		-0.0636088	-0.0184039		-0.125883	0.230626	-0.00383536	0.0157546	0.0145065	0.0166355		0.0576051				-0.016286	0.00351689	-0.00968353	-0.00910643	-0.0826425	0.0327832			0.104783	-0.043772	0.180092	0.0256696		0.0181383
Effect_size	msp_0334	-0.0466864	-0.116928	-0.040868	-0.0169508	-0.0622213	0.0427958	-0.164443	0.00187656	0.0712267	0.0211454	0.00173306	0.148646	0.0241076	-0.15735	0.152798	0.0682399	-0.0166974	0.0912297	0.0705734	-0.251532	-0.0471408	-0.0360206	0.302407	-0.267307	-0.0502502	0.0888851	-0.0491779	-0.0096675	-0.0799936	-0.121667	-0.193193	0.112729	-0.0919614	0.237785	-0.0162492	-0.0146239	0.0709443
Effect_size	msp_0335	0.0077353	0.256268	-0.138587	0.0384064	0.197442	0.0092606	0.169377	-0.0347783	0.0498134	-0.0421109	0.0472429	0.180778	0.18576	0.0749547	-0.024009	0.0242578	-0.0492909	0.0676366	-0.0285611	0.10072	-0.0122407	-0.0304549	-0.348932	0.225649	0.0640002	0.0863007	0.0180104	-0.0324119	-0.0798987	-0.179878	0.0976999	0.258271	-0.0434423	-0.0452626		-0.0550982	0.198341	0.0711482
Effect_size	msp_0336	0.0174253	0.172366	0.057087		0.0214869	0.000185766	-0.0225353	0.0302881	-0.0698301	0.0448096	0.0294155			-0.00106727					-0.0299592						0.243985	-0.0085935	0.0208274	0.000655093		0.0992172		0.0635		0.00128872		-0.0465958		-0.001693
Effect_size	msp_0337	0.135432	0.137177	-0.275095	-0.0295148	-0.0127432	0.0914074	-0.0223655	-0.0863775	-0.00536411	0.0957678	-0.0285701	0.191899	-0.355943	-0.13802	0.224891	0.0837321	0.170007	-0.00309395	-0.0754524	-0.0333376	0.0791407	-0.200093		-0.62308	-0.171853	0.0823899	-0.108345	-0.269496	-0.0323615	-0.192304	-0.121136	0.265575	0.0781844	-0.00118538	-0.271581	0.0646173	0.109081	-0.0986134
Effect_size	msp_0338		0.0874214		0.0812694		-0.00682368	0.0970362		0.125458		0.128029	0.00353588	-0.00411822	-0.00106727		-0.0453882			-0.0494971			0.126499			-0.0668107	-0.179947	-0.113078	-0.0723254	0.247504	0.0678047			-0.0288864	0.131801
Effect_size	msp_0339				0.0339603		-0.101897				-0.00568394	-0.0199148					-0.00467522			-0.120898			-0.0343509			0.277044	-0.0553671	-0.0936694	0.13481	0.172995			0.0140955		-0.104255		-0.0470737	0.235446	0.0712461
Effect_size	msp_0340	0.0445651	-0.057252	-0.271877	0.00864487	0.120969	0.171905	-0.071496	-0.047462	0.0098135	0.0493739	0.0451022	0.212475	-0.199076	-0.159694	0.21269	0.0721042	0.168513	-0.0267423	-0.029576	-0.116547	0.0131949	-0.152221	-0.279715	-0.249636	-0.0841566	0.0885442	-0.1243	-0.0832444	-0.265812	-0.234323	-0.13796	-0.0853082	0.101069	0.0400367	0.0813884	0.152451	0.0608431	-0.0736274
Effect_size	msp_0341	-0.00408484	0.119318		0.0874429	0.248264	-0.0324906	0.0488304	0.133051	0.0475307		0.0843348		0.0538107	0.0552688	0.120899			-0.158595	-0.0365998		-0.080784	-0.0549983			-0.000754555	0.150643	-0.0754953	0.053975	0.0682561	0.0592794			0.131574	0.0121256		0.0091012	0.0286359		0.119113
Effect_size	msp_0342	-0.00348228	0.127594	0.0575153	0.0331391	0.0818983	0.0305335	0.149466	-0.0652059	0.0903664	0.0438564	0.0721293	-0.00960537	0.141879	0.115264	0.0453828	-0.011699	0.16529	0.0661271	-0.00808019	0.0617213	0.159751	-0.122916	0.235219	-0.0121503	0.028968	0.00154522	0.0100626	0.037077	-0.0462267	0.113186	0.093549	-0.0454532	-0.00504677	0.0367586		0.0728327	0.123091	0.029129
Effect_size	msp_0343		0.0490447		-0.0506996		0.0840458	-0.0217613	0.270504	0.128156	0.0466766	-0.0988586	0.0152014	-0.13183	-0.128498	0.0279951	0.050252	-0.120871	0	0.0935353	-0.0349531	0.00939188			0.0819811	0.0367736	0.0865002	0.0159432	0.0575539			-0.189445	-0.0150156		-0.00379409		-0.0856391		0.073621
Effect_size	msp_0344		0.132903					0.0730231		-0.0233248		-0.0376928			0.0463778		0.127412	0.0174411		0.0190735		-0.0276633							0.101129						0.0142001		-0.149739		-0.0445974
Effect_size	msp_0345	-0.00751651	0.257055	0.108993	0.0224258	0.161879	-0.0591185	-0.107172	-0.0992413	-0.108737	0.0416549	-0.0361223	-0.0325201	-0.296578	-0.21142		0.0535165	-0.209734	0.273689	-0.137551		-0.110752	-0.196514			0.0882621	-0.0255326	0.0962156	0.0223273	0.101299	-0.0911708		-0.0676846	-0.0482667	-0.0883587	0.0180232	-0.237858	0.0993695	0.0120712
Effect_size	msp_0346	-0.0447313	0.147946	-0.524626	0.0353076	0.183451	-0.00161104	0.0197192	-0.057388	-0.206806	-0.27165	0.0807177	0.129268	-0.215485	0.138154	-0.0684898	0.0551371	-0.0223447	-0.162849	-0.0983311	0.0866833	0.0558838	-0.21285	-0.408815	-0.373882	-0.082998	0.0394044	-0.178388	-0.142393	-0.257533	-0.0991617	-0.0258864	-0.091338	-0.0431979	-0.0731756	0.142046	0.174644	-0.0516054	-0.143608
Effect_size	msp_0347	0.0226077	0.0919148	0.0394084	-0.00797594	0.125174	0.0025866	0.0680284	0.0740658	0.0774323	0.059601	-0.0488425	0.101222	0.151076	0.105816	0.142963		-0.138797	-0.0624203	0.0310611	0.00971591	-0.250722	0.188315	0.102062	-0.0326077		0.176037	-0.0130725	-0.0605582	0.17568	0.0491074	0.0160707	0.126341	0.0178646	0.125914		0.0805452	0.0338939	0.00945665
Effect_size	msp_0348	-0.238459	0.000452487	0.117458	0.0348437	-0.0797171	-0.0369105	-0.119391	-0.0928208	-0.143169	-0.0111021	0.034543	0.101401	-0.347101	-0.151135	-0.0668588		-0.207462	0.126256	-0.0632277	0.0773642	-0.139562					0.00989079		-0.000496374	-0.0772184	-0.14399	-0.0660473	-0.0353724		-0.0642653		-0.0552337	-0.0805665	-0.0880153
Effect_size	msp_0349		0.0334793					-0.0326602			-0.00683032			-0.00513764	-0.00228296																		-0.0150156				0.0754948
Effect_size	msp_0350			0.0394084	0.00355292		-0.00866111		0.103953	0.198652	-0.0133762	-0.0456255	0.092061			0.112366		0.0723928		0.0413813		0.00700965	0.0415228				-0.0175448	0.0998625	-0.0084357	0.0924944	0.233095		-0.0685555	0.0898284	0.0559155			0.225748	0.073621
Effect_size	msp_0351		-0.0256436					-0.0778067	0.0536025	-0.119388		0.00357698																							-0.00480346		-0.0677709	0.155097
Effect_size	msp_0352	0.230978	0.0203522	-0.0545344	0.00136812	0.164403	0.056185	-0.0196298	-0.0156474	0.0192442	-0.108413	-0.0886622	0.0577132	-0.15128	0.0323642	-0.00063754	-0.00312305	-0.188325	-0.0240078	-0.00774133	0.0542347	-0.0719683				-0.0115851	-0.00770876	0.047038	-0.0370862	-0.0526642	-0.17153	-0.0522579	-0.114434	-0.0430286	-0.0153169	0.200027	0.086778	-0.0394769	0.198371
Effect_size	msp_0353	-0.0940668	-0.0351238	-0.0612853	-0.0137871	0.0136467	-0.0531398	0.0650372	-0.147521	-0.138344	-0.0337079	-0.0113871	-0.045702	0.029221	0.157522	-0.0984121	0.0652509	-0.312997	-0.165783	-0.0288378	-0.00981525	-0.303108		-0.255883	-0.108909	0.0367984	0.107853	0.065777	0.101507	-0.116607	-0.0391657	-0.139743	-0.0328273	-0.290444	-0.172161	0.057205	-0.0307474	-0.0235728	-0.0138682
Effect_size	msp_0354	0.0615414	-0.0555132			0.0392512	0.0849587	0.0465582	0.0487557	0.0164494		0.00357698	-0.019286	-0.191737	0.0987459	-0.00490428	0.107696	-0.172562	-0.0624203	0.0368137		-0.0104699												-0.042648	0.00367473	0.0700904	-0.0775707		0.180388
Effect_size	msp_0355		-0.0279748					-0.0778067															0.0924096							0.187011			-0.0722121
Effect_size	msp_0356	0.0533701	0.105953	-0.11278	-0.00222163	0.0926762	0.106923	0.0550896	0.0912731	-0.0435508	0.0320307	0.045332	0.0570981	-0.159963	0.19455	0.0403327	0.0250306	-0.0688094	0.401135	-0.0563053	0.223163	-0.00338365	-0.257359	-0.408815	0.0170138	0.00428361	0.180919	-0.103264	0.0184324	-0.224787	-0.212558	0.0159502	-0.147222	-0.171083	0.00862992	0.126667	0.0546139	0.0684368	0.145744
Effect_size	msp_0357	0.0368604	0.182603	-0.118607	0.032305	0.0831516	0.132047	-0.0115914	0.01301	0.122154	0.129749	0.0349283	0.228161	-0.234342	-0.116815	0.153623	-0.0160298	0.0425853	-0.026676	0.0170838	-0.0515761	0.0224529	-0.0814002		-0.223148	-0.0311883	0.0947583	-0.0153901	-0.0144752	-0.0575107	-0.202263	-0.0409237	0.235101	0.104015	-0.0568858	0.354038	0.200871	0.0626988	0.0589233
Effect_size	msp_0358												0.0791238																									0.150148
Effect_size	msp_0359	0.073427	-0.0925487	-0.0497347	0.00977367	-0.0290298	-0.0123864	0.038235	-0.0352016	0.141607	0.0131228	-0.0208852		-0.0584659	-0.00520495					-0.0439733	0.107375	0.00420579	-0.0189175		0.109308	0.0447968	-0.0455028			-0.0541087		0.036477	0.0649304	0.0970173	-0.029672		0.164941		-0.0583016
Effect_size	msp_0360	0.141801	0.0977109	0.0521922	0.0616764	0.241442	0.122168	0.145612	0.025034	0.245248	0.0432072	-0.00655584	0.351276	0.450494	0.434526	0.300715	0.00415834	0.239071	-0.064973	0.119172	0.0618845	0.269589	-0.0352554	0.170783	-0.111635	-0.0199996	-0.00615014	-0.00619867	-0.0540326	-0.0232246	0.193746	0.0809705	-0.192336	0.0372658	0.137558	0.211675	0.0290003	0.336155	0.161106
Effect_size	msp_0361	0.0299821	0.0339127	0.0216078	-0.0430567	-0.033172	-0.00388314	-0.10676	0.0487968	-0.0897636	0.0367031	-0.0306739	0.0652843	-0.222882	-0.130315	-0.0475091	0.0682529	-0.0612485	0.110436	-0.0472632	-0.0781575	-0.0765026			-0.00958725	0.0415407	0.0493945	-0.00834368	0.00510553	-0.115764	-0.156494	-0.202959	-0.00567243	-0.110316	-0.0773745	-0.0953417	-0.0248954	-0.0906191	0.115794
Effect_size	msp_0362	0.0996474	0.056316	-0.11635	0.118389	0.128437	0.00652647	-0.00183721	0.0619333	0.0660423	0.081802	0.0124189	0.163013	-0.100865	-0.139447	0.116863	-0.0313613	-0.284055	0.301116	-0.0554825	0.112458	-0.233689	-0.074493		0.231539		0.189048	-0.048661	-0.121302	0.124277	-0.216556	0.0353214	0.217487	-0.0603489	-0.00926926	-0.210375	0.0144597	-0.0976791	-0.207832
Effect_size	msp_0363		0.134932		0.0160647		0.104282	0.0504228		0.0772239	0.0277189	0.0226895	0.0246952		0.0463778		0.0151383	-0.0410226		0.0274503			-0.0199685			0.0434184	0.0100615	-0.0251963	0.00874408	-0.0374564			0.0393439	0.00162357	-0.0181812		0.0661848		0.0712461
Effect_size	msp_0364	0.0384488	0.0943508	0	-0.0213277	0.283913	0.0549949	0.280932	0.0153123	0.217829	0.197674	-0.018067	0.134722	0.350745	0.461353	0.0868203	0.0465226	0.071505	0.0468817	0.0576158	-0.0229227	0.0202562	-0.185194	-0.18006	-0.49834	0.0531695	-0.0135635	-0.111112	0.0083936	-0.11265	-0.217115	-0.0546596	-0.21319	-0.0879324	-0.0363872	-0.285654	0.0664054	0.252312	0.261352	-0.10659
Effect_size	msp_0365		-0.0700021	-0.114664	0.0524168	0.115229	0.0750494	0.0310876	0.0261104	0.0805262	-0.192796	0.0671922	0.0136659	0.0258366	-0.0430605	0.176851				0.0201743									0.00795658				-0.164559	0.0923967	0.17884		0.0297241	0.156431	0.132399
Effect_size	msp_0366				0.119552		-0.00383366	-0.076488		0.00231084		0.0631051	0.036955	-0.00660553						0.0420142			-0.00788908			0.00473829	-0.0521096	-0.0521428	-0.052437	-0.0109787	0.0692473		-0.0150156	0.0559508	0.160517
Effect_size	msp_0367	-0.0692813	-0.0610588			-0.0676536	-0.00899106	-0.217627	-0.0443502	-0.0903442	-0.0539789		-0.0136831	-0.251208				-0.143741		-0.0215604	0	-0.155406			0		0.0538178	0.00844188	0.0482999			-0.0911695	-0.0311228				-0.12573		-0.0149767
Effect_size	msp_0368c				0.185686		-0.00373734					0.0989125																	0.0588006	0.0871909					-0.0208267
Effect_size	msp_0369	0.111989	-0.0207924	0.0140557	0.102725	0.258575	-0.0380353	-0.109266	0.15138	0.185487	0.281623	0.0735331	0.0646379	-0.118717	0.056632		-0.0248105			-0.0301381		0.011014	-0.069835			-0.0385818	0.137876	-0.0396545	0.134268	-0.0411536			0.0900584	-0.0344317	0.00175214	0.180092	0.0658981	0.0435691	0.218799
Effect_size	msp_0370	0.0682951	0.180528	-0.270904	0.0474637	0.0845333		-0.0107846	0.160095	-0.0127431	0.220396	-0.0295764	0.090597	-0.0136825	-0.0327552	0.0716437	0.127412	0.196811	0.0158595	0.0741963	0.0047478	-0.0321537		0							-0.00476271	-0.0443596	-0.108015	0.0467008		0.0771482	0.0309751	0.169008	-0.13063
Effect_size	msp_0371																	-0.066722																			-0.0449247		0
Effect_size	msp_0372	0.0199146	-0.0460204			0.16779	0.0568234	0.108399	0.113532	0.188117	0.115252	0.00886337	-0.0258936	-0.0803565	0.000547216	-0.0278245	0.0837361	-0.00656986		0.0852453	-0.102071	-0.0112611					0.0577445	-0.0276918	0.0786608			-0.140339	0.0287207		-0.0136925	0.0523199	-0.0670915	0.115152	0.181383
Effect_size	msp_0373	0.0743332	0.0229066	0.0220076	-0.0275568	0.0738292	0.0202444	-0.0804806	-0.0427185	-0.0444328	0.0427677	0.00521527	-0.0825795	-0.347461	-0.0899935	-0.219508	0.0593306	-0.27146	0.307883	-0.0414877	-0.0756537	-0.201098	-0.133511		0.263273	-0.0267461	0.0651765	-0.0797589	-0.0047225	-0.16032	-0.188952	-0.13874	0.0493141	-0.156715	-0.0832044	-0.126551	0.0078012	-0.046448	0.0721399
Effect_size	msp_0374	0.0215143	0.145244	-0.0371855	0.0727765	0.112942	-0.072616	-0.0649501	-0.128145	-0.253663	-0.0689668	0.0811766	-0.112024	-0.315941	-0.015871	0.0506298	0.0555526	-0.0497244	0.156927	-0.188618	0.145702	0.00575363	-0.225166	-0.365782	-0.572801	-0.00899475	0.208064	0.0352614	-0.0371077	-0.189097	-0.128449	-0.0175444	-0.194398	-0.114451	-0.0769193	-0.100714	0.0144193	-0.108067	0.0124441	-0.150289
Effect_size	msp_0375	-0.0236468	-0.120481	-0.159386	0.0637421	-0.0428564	-0.0263526	-0.0947593	-0.00965255	0.0326098	-0.0725367	-0.0198141	0.110523	-0.268709	-0.226256	-0.0391086	0.0812139	-0.119573	0.00397824	-0.00547783	0.117508	-0.146584	-0.0547784	0.0578799	-0.136635	0.0755633	0.0422946	0.051458	0.0600694	-0.0306905	-0.156871	-0.0190073	-0.0408305	-0.0114514	-0.0310999	0.0212921	0.00925721	0.0932481	0.0904572
Effect_size	msp_0376	-0.12363	0.18608					0	0.0800097	0.110281	0.11817		-0.04135	-0.0988891		-0.0712502		-0.0114992		0.00799118	-0.0349531	0.0189313			0		0.103102			0.0214465	-0.0809661	-0.0660473	0.0941838	-0.121723		0.0653539	-0.147631	0.0740336	0.153939
Effect_size	msp_0377								0.101025	0.103157			0.139754			0.0949426						0.00700965													0.00350957		-0.0465958
Effect_size	msp_0378	0.0764878	0.187524	-0.174811	-0.0722456	0.0451786	0.0043375	-0.0724398	-0.0999712	0.0166559	0.148322	-0.039669	-0.0703531	-0.275468	-0.0816338	-0.0957727	0.00922966	-0.21747	0.110212	-0.0567371	0.201681	-0.24923	-0.175945		-0.0121503	-0.0918796	0.10105	-0.0869236	-0.123607	-0.126788	-0.250465	0.0498461	0.0797266	-0.098272	-0.0183664	-0.284427	-0.0802418	-0.105528	0.0799558
Effect_size	msp_0379	-0.0982833	-0.0271	-0.168084	-0.0985838	0.0635898	0.258576	0.106701	0.201169	0.0727414	-0.0878642	0	-0.0298788	0.194854	-0.0708678	0.214155		0.145029	0.247705	-0.0408051		0.0475824	0.109229				0.0496541	0.0524664	0.00269227	-0.0208822	-0.0596703		-0.204685	0.0297331	0.142123		-0.0449942	0.0519845	0.18732
Effect_size	msp_0380	-0.0717287	-0.0737036	-0.375044	-0.00321238	-0.165723	0.117253	-0.359906	-0.0699705	-0.0858613	-0.126076	-0.0320387	0.251206	-0.531998	-0.51667	0.291051	0.0522691	0.00720184	-0.133138	-0.0909128	-0.164646	0.121123	-0.0230305	-0.364267	-0.254824	-0.218309	-0.0432661	-0.040309	-1	0.281751	0.0955462	-0.0392415	0.0296046	1	1	0.223503	-0.134537	0.0552851	-0.0917398	0.153657
Effect_size	msp_0381	-0.0355776	0.0528126	0.109338	0.0215851	0.0584882	-0.053895	0.0225743	0.0173028	-0.094171	0.164132	0.0562196	0.0337178	-0.0348964	0.183073	-0.0554234	-0.0326804	-0.331113	0.255369	-0.0421392	0.0367405	-0.207361	-0.12737		0.0544543	0.055186	0.0414427	-0.00497098	0.171915	-0.093169	-0.146757	-0.0757657	-0.0297481	-0.159674	-0.120266	-0.124527	-0.143654	-0.049908	-0.067547
Effect_size	msp_0382	-0.0716257	0.121397	0.069698	0.0843396	0.0753097		0.0504031	-0.0171839	-0.049144	0.0686767	-0.0202802	0.0136659	0.110268	-0.076063	0.0819884		-0.0209673	0			0.0465535					0.0206519				-0.0576579		-0.0363977	0.0298343	-0.00465566		0.0683668	0.153763	-0.116095
Effect_size	msp_0383	0.0415872	0.0848666	0.139243	-0.0550116		0.058203	0.0303104		0.0788601	0.0621994	-0.0504082		-0.0968812	-0.00062657			0.119735	0.0145065	-0.00261879		0.00700965	-0.0236546			0.0362989	-0.0144521	-0.012984	-0.0176981	-0.0592904			-0.0263989	-0.0419697	-0.0258421		0.0549864		0
Effect_size	msp_0384				0.0356958	-0.0311033	0.0251426					-0.00401696	0.181312			0.000115707	0.060428	0.117635		-0.00312141		0.0655728				-0.0169103	0.0278213	-0.0125342	0.0387038	-0.0333773				-0.139573	0.00389995		-0.0867977	0.00869881
Effect_size	msp_0385	-0.0135208	0.0502784	0.154838	0.116608	0.304972	0.0682486	0.0778422	0.0686748	-0.00616388	0.0870065	-0.0209509	0.00296184	0.234109	0.188649	0.0247819	-0.010058	0	-0.137449	0.0183876	0.0659028	-0.0593901	-0.0820751		0.218706	-0.000854509	-0.0193288	0.0157388	-0.053207	-0.00101591	0.0455111	0.118019	0.0406707	-0.0344955	0.0870665	0.163328	-0.0182891	0.0532402	-0.0258458
Effect_size	msp_0386	0.111989	0.155938	-0.162059	-0.0464097	0.0778154	-0.0823937	0.115706	0.211227	0.170269	-0.101698	-0.0155962	0.0714053	0.12253	0.149798	-0.0173387	-0.00983069	0.128769	0.114231	-0.0252834	0.0161932	0.0520304	-0.0686455		0.109308	0.0193178	-0.0810477	-0.0680931	0.0481564	-0.00938562		0.047285	-0.105452	-0.0561864	-0.00228246		0.147083	0.139911	0.0397196
Effect_size	msp_0387	0.0174253	0.0850902		0.0339603	0.018959		-0.024145		0.00115542	0.0466766	0.00530549	-0.0268357		0.0463778		0.0369382	0.0199559		-0.0384666		-0.046016					-0.0476085	-0.0473313	-0.0350425	-0.0341866				0.00138596	-0.033351		-0.0155475		0.073621
Effect_size	msp_0388	0.0703947	-0.0233115	-0.108356	-0.0951162	0.0890657	-0.214983	-0.0988622	-0.102115	-0.304875	-0.0637568	-0.0761421	-0.0139925	-0.218246	0.115263	-0.104279	-0.0554482	-0.17362	-0.041424	-0.178801	0.396722	-0.0703799	-0.206848	-0.17142	0.0170138	0.018648	0.0128686	0.156146	0.0286667	0.142006	-0.0154286	0.29248	-0.0332923	-0.16352	-0.12361	-0.0398006	0.0364779	0.0463598	-0.251338	-0.113397
Effect_size	msp_0389	0.0634707	-0.0332604	-0.00763431	-0.0815143	0.0232247	-0.0990013	-0.0670096	-0.1734	-0.274525	-0.164697	-0.0880926	-0.102424	0.00766599	0.0620201	-0.0326458	-0.0533966	0.0201693	-0.0621313	-0.213699	0.0184432	-0.00981631	-1	0.0857099	0.238194	-0.0272537	0.0468759	0.156853	-0.0853607	-0.20988	-0.146556	0.140326	-0.0818845	-0.194972	-0.237664	-0.0669323	-0.00634536	-0.0558379	-0.148987
Effect_size	msp_0390											0.00380054								-0.0728985						0.00482427	-0.0079213	0.0916957	0.0473429	-0.0555049
Effect_size	msp_0391	0.0803352	0.137537	-0.0673166	-0.0310732	0.265706	0.113771	0.0641982	0.19992	0.0409734	-0.0533718	-0.0125169	0.0830786	0.155863	0.151074		0.0128136	-0.0226633		-0.02403	-0.0252446	-0.0351031			0.199336	0.0027106	-0.0300862	0.0573355	-0.016775		-0.0394492	-0.0542173	-0.014789		-0.0464533	0.307531	0.0471176	0.003673	-0.131573
Effect_size	msp_0392	0.107767	-0.0124485	0.0530094	0.0654355	0.0323823	-0.00311896	-0.134117	0.0667572	0.00484358	0.20695	0.0629501	0.0143124	-0.333992	-0.159789		0.0516975	-0.120896	0.102207	-0.0457056	0.0522257	-0.132138			0	-0.00225388	0.0469929	-0.0193276	-0.0437734			-0.116292	0.157382	0.00912557	-0.0337899		-0.105919	-0.017854	0.07782
Effect_size	msp_0393	-0.0143661	-0.0700021			-0.0658495		-0.120327		-0.0722947			0.0240232	-0.0514135	-0.00814541			-0.0193545				-0.0338108															-0.180489		0.0745022
Effect_size	msp_0394						0.0708307		0.101025	0.00231084													0.0921382				0.0591939								0.0299231		-0.0447414
Effect_size	msp_0395				-0.101463				0.101025			0.0167639	0.0136659									0.0678736								0.021214	0.0513833					0.234299	-0.0717795
Effect_size	msp_0396	0.042149	0.149572	-0.166665	0.0213627	-0.109673	0.022471	0.0624756	0.0103189	-0.101271	-0.166044	-0.0722385	0.0652136	-0.229169	-0.0246034	0.22599	0.0445153	-0.00576636	-0.080227	-0.092966	0.0129284	-0.0592707	-0.22567	-0.607548	-0.416582	-0.0728621	0.162305	-0.0915584	-0.174629	-0.260368	-0.359615	-0.105573	-0.0146458	-0.185043	-0.00247057	-0.259601	0.0126213	0.090244	0.0597009
Effect_size	msp_0397	0.0154523	0.000904974	0.189445	0.00136169	0.0294384	-0.0346819	-0.144516	-0.0563876	-0.0759228	0.184821	-0.0141833	-0.0152498	-0.198922	-0.273075	-0.0651509	0.0402824	-0.124436	0.24488	-0.0283233	-0.068843	-0.11448			-0.291608	-0.00998831	0.0834879	-0.0470769	-0.0183537	-0.061184		-0.185087	0.150453	-0.134065	0.00240868	-0.0725477	-0.106315	-0.047902	0.0237351
Effect_size	msp_0398	0.106966	-0.0681515	-0.0265446	-0.0555105	0.275544	0.111539	0.00867916	0.0584495	0.211598	0.142811	-0.0263525	0.0686903	-0.437335	-0.0379945	-0.125772	0.0649997	-0.204961	0.0661271	-0.0218653	-0.176674	-0.197718			-0.527299	-0.0477268	0.102273	-0.0319163	-0.0272982	-0.121551	-0.320921	-0.266741	0.027456	-0.204237	-0.0473057	0.0775	-0.0622499	-0.123463	0.193783
Effect_size	msp_0399	-0.0820905	-0.154034	0.0799739		0.135929	-0.0189616	-0.139716		-0.183308	0.021389	-0.0225925	0.0619273	-0.257405	-0.295915	-0.063768		-0.0865758	0.138001	-0.0349535	-0.0513173	-0.120318		0	-0.0628335	0.0200318	0.038189		0.0335379	-0.0162239	-0.120021	-0.05184	0.0543146	-0.0519347	-0.0567693	0.0290346	0.0153162	0.0441226	0.0545999
Effect_size	msp_0400	-0.0710578			0.105544					-0.0397321		0.0387782	-0.0046247			0.28407				0.035021														-0.038186	0.0299231			0.097259
Effect_size	msp_0401	0.0166	-0.0183003		0.0232456	-0.00176031	0.07884	0.0952635	0.198075	0.114131	-0.0520143	-0.0583565	-0.0425173	-0.0409541	0.118168	-0.0274721	0.108588	-0.122088		0	0.0212136	-0.122094					0.0602162	-0.014521			-0.0735768	-0.195656	-0.177928	-0.0779646	-0.00836422	0.200243	-0.015856	0.0180649	0.158863
Effect_size	msp_0402	-0.0533308	0.132903		-0.0402546	0.0803903	0.0836116	0.0960941	-0.0180667	0.00792493	-0.105559	0.00608014	0.00994871	0.0807343		-0.0962714	0.0908462	0.0242625		0.0291933	-0.0245728	-0.0351031							-0.0161706			-0.0359741	0.0519244	-0.0826501	0.114264	0.123607	0.0767612	0.0247626	0.0181383
Effect_size	msp_0403	0.029357	-0.134036		0.0236458	0.157929	-0.0181052	-0.248868	-0.0956006	0.0897576	0.00713799	-0.057176	-0.0368321	-0.284832	-0.256618	0.0549105		0.0242625	0.0145065	0.0243456	0.0515187	0.0123871	0.128086		0.0819811		0.225033	0.00208027		-0.00645169	0.297982	0.067159	-0.0422908	0.134212	0.105495	0.123607	0.00984415	0.00393576	-0.0701725
Effect_size	msp_0404	0.0893734	0.0431529	-0.0845878	-0.0638722	0.172394	-0.0301112	-0.12873	-0.0554775	-0.0292094	0.0606888	-0.0485464	0.0356915	-0.520237	-0.115821	-0.0346531	0.0535321	-0.298603	0.135104	-0.0554565	-0.100995	-0.183543			-0.185957	0.0664873	0.149764	-0.0283466	0.0398752	-0.140089	-0.26156	-0.186709	0.0349966	-0.0640294	-0.0809496	-0.110703	0.0191581	-0.0548318	0.19804
Effect_size	msp_0405	0.0721655	0.136172			0.34388	0.0263774	-0.0713699	0.0413434	0.0413179	-0.0943023	-0.0127605	-0.0418998	-0.150321	-0.1503		0.00516492	-0.158115		-0.0198101		-0.00407007					0.130161	0.0359277	-0.0119385	-0.0258929			0.0796114	0.324804	-0.0145459		-0.0283788	0.0264948	0.0993206
Effect_size	msp_0406						0.0676163					0.00498875					0.0280288			0.133806			-0.037761				-0.106993	-0.0239161	-0.0894592	-0.100411					-0.0427404			0.0978167
Effect_size	msp_0407	0.0825492	-0.0270618	0.026781	0.0384972	0.111341	-0.0617987	-0.0875188	0.032214	-0.136715	0.192961	-0.0523638	-0.0258604	-0.224218	-0.10373	-0.0418713	-0.0400386	-0.0693116	0.0553473	-0.0972968	0.100995	0.0725463			-0.178615	0.0734181	0.138385	0.0212031	-0.0396257	-0.115033	-0.277016	-0.0320628	-0.0715449	-0.116573	-0.0911982	-0.0915281	0.0742455	-0.0501928	-0.13398
Effect_size	msp_0408	0.10455	-0.125554		0.0128568	0.0409421	0.0544271	-0.164248		-0.0475794		0.0405656	0.0250312	-0.131313	-0.203017	0.0975371		-0.0615229		0.145108	-0.166753		0.147795		0.0819811	0.00396761	0.0777396	0.120395	-0.0682901	1	0.152626	0.078061		0.00112401	0.253985			0.0300843	0.0207295
Effect_size	msp_0409		0.0393265	-0.0603165	0.0186252		-0.0265996	0.0357507	0.0261104	0.0799708	0.0149975	-0.0679173	0.10545	0.0809092	-0.0471615	0.0276385	-0.0433497			-0.000953131			-0.0134173			-0.0140729	0.0505165	-0.107843	0.0131262	-0.0153654			-0.207421	-0.0087888	0.0409517				0.0684204
Effect_size	msp_0410	0.0848444	0.0901767	0.0446628	0.00116716	0.142778	0.139082	0.132405	0.171302	0.0547396	0.077468	-0.0227971	0.126622	0.156279	0.118393	0.0644126	0.0986468	0.123327		0.0369757		-0.00523295					-0.0210969	0.00530609		-0.0286987			-0.0672741	-0.0694066	0.113856	0.0246875	-0.0106449	0.0186809	-0.0254636
Effect_size	msp_0411	0.0365977		0.057087		-0.0640455		-0.0338062	0.195715	0.0454081			-0.0073198	-0.0573953	0.036909	0.271073		-0.0761825				-0.127874									0.0262637			-0.0899643			0.0629654	0.265722	0.073621
Effect_size	msp_0412	0.0811822	0.030932	-0.152678	0.0693908	0.0960508		0.0570107	0.0526506	-0.10478	-0.0858546	0.0941316	0.136549	-0.0502675	0.0607002	9.94593e-05		0.0538729	0.311616		0.081716	0.0419165		0.157552	-0.241744	0.0449627	0.0766302	0.0527888	0.00407078		-0.0506067	-0.0791091	0.0687962	-0.00795513			-0.0651274	0.175628	0.00743181
Effect_size	msp_0413	-0.028586					-0.0164946						0.0534355				-0.0156132		0.114231	0.107125			-0.00352205				-0.0781075	-0.0880554	-0.0745257	-0.0899826					0.0587568
Effect_size	msp_0414	0.18022	-0.125794	0.0802764		0.18718		-0.0750549	-0.126896	-0.0324016	0.187851	-0.00960403	0.00294656		-0.204116	0.0596241	0.102313	0.0464201		-0.0401682		0.0875079				0.0816393			0.18814	0.0383253	0.0163018		0.135434	0.0409623		0.0348799	-0.0487038	-0.0279784	0.103899
Effect_size	msp_0415												-0.0344748																					-0.0617847				-0.0304993
Effect_size	msp_0416	-0.0143661	-0.00455994		0.0859478			-0.0105025	-0.0906019	-0.132995		-0.00900378	0.136918					0.0661013				0.0576051							0.0999477						-0.0113056		0.0888986	0.119963
Effect_size	msp_0417	0.0766194	0.0857268			0.314253		0.108389	0.106325	-0.0659039		0.0252375		0.119755	0.214956	-0.0113092		0.011761																-0.0470564			0.0129394	0.0921225	-0.000444809
Effect_size	msp_0418	0.0447451	0.150869	-0.0633778	-0.120035	0.151217	0.040979	-0.0431757	-0.0719461	-0.03789	-0.0242789	0.0242456	0.00135996	-0.257623	-0.120429	0.00927039	0.0275642	0.0353538	0.0114326	-0.0894297	0.0756537	-0.0924406	-0.131859		-0.315908	-0.0422023	-0.0212346	0.0116258	-0.0253409	-0.0186265	-0.174128	-0.0279257	0.0482578	0.028207	-0.0177357	0.0653498	0.0716993	-0.0485529	-0.0614864
Effect_size	msp_0419	-0.0948026	0.0161987	-0.136366	-0.0742681	-0.0738336	-0.0708705	-0.0162103	-0.0236149	0.0369001	-0.122798	-0.0548489	-0.0826154	-0.180738	-0.173162	-0.0178219	-0.0135657	-0.0584901	0.100833	-0.0333869	0.0254442	-0.0381233	-0.0846931	0.302407	0.139535	0.079375	-0.00422467	0.110598	0.0180751	-0.101174	-0.0486435	0.175364	-0.0331738	0.0804314	-0.0679551		-0.13018	-0.0745298	0.0417751	0.054494
Effect_size	msp_0420												0.0747786				0.0429702			-0.0213717															-0.0452406
Effect_size	msp_0421	0.122575				0.125385		-0.00102849		0.0346313		0.0666738	0.00697454	-0.00513764	-0.000760986	0.0186788		0.024662				0.0441893															-0.0405359	0.10362	0.215322
Effect_size	msp_0422	-0.0161962	-0.223486	-0.404136	0.0219678	-0.127913	-0.112431	-0.335378	-0.00891179	0.100582	0.0588632	-0.00771893	-0.0341242	-0.575088	-0.471477	0.0916219	-0.0687507	-0.0332902	-0.0389564	-0.206369	0.221511	-0.21428	-0.17262		0.135906	-0.208185	0.0487142	-0.0738355	-1	-0.168284	-0.368132	0.057085	0.337542	0.113635	-0.0855886	-0.175409	-0.0455088	-0.107021	0.00692472
Effect_size	msp_0423	0.166009	0.165688	-0.0153361	0.0206294	0.23165	0.0800873	0.123286	-0.004532	0.106086	-0.0699315	0.000515777	-0.0108902	0.0872721	0.151753	0.0422926		0.00443618		-0.00364046		-0.215488				0.0686388	0.0373703	0.0600549	0.0330493	-0.0357758			-0.195566	0.00324062	0.0129585	-0.0675165	-0.0633502	0.170577	0.0723194
Effect_size	msp_0424	0.0159318	0.00152296	-0.0633778	0.046214	0.00170058	0.05107	-0.0237262	0.00993995	-0.0926111	0.0780304	0.0581082	0.0600337	-0.348446	-0.0109391	0.0473699	0.0183345	-0.0762656	0.323923	-0.0320877	0.0186411	-0.0698271			-0.261806	-0.0082097	0.161557	-0.0671604	-0.0817404	-0.129094	-0.319391	-0.138702	-0.0274957	-0.0542136	-0.0224844	0	-0.13321	-0.0606294	0.156791
Effect_size	msp_0425	-0.0470083	0.0382116	-0.0497188	-0.00941967	0.0753821	0.0891204	0.128083	0.012307	0.0221311	-0.0328278	0.0169338	0.0438541	0.132639	-0.0042858	0.102161		0.114945	-0.0432141	-0.0017872	0.0901155	0.0395378	-0.0915025		0.0546541	-0.0224381	-0.0514046	-0.0605898	-0.0668019	-0.124148	-0.0353434	0.057914	-0.101301	0.0604851	0.0867424		0.167145	0.101301	-0.0498559
Effect_size	msp_0426	0.023982	0.00311437		-0.0466253	0.479875		0.10601	-0.0256185	0.0385075		-0.0490275		-0.130511	-0.0770681				-0.0781582				0.00814781				0.0110903	-0.0146707	0.149645	-0.0232066	0.0582771			0.0133787	-0.0246948	0.212186	0.0186726	0.0437972	0.0658759
Effect_size	msp_0427		-0.0303061															0.00882076																			-0.151059
Effect_size	msp_0428
Effect_size	msp_0429	-0.0111737	0.0677139	-0.0683078	0.0107831	0.037914	0.00263646	-0.0540667	0.0458536	0.00848762	0.0469276	0.000983031	0.0609842	0.0177457	-0.0113613	-0.0322087	0.00285176	-0.0903208		0.0316321	-0.0436924	-0.0975901	-0.0362945		-0.163962		-0.0179375	0.0141558	0.0223838		-0.0617462	-0.0797091	0.106014	-0.133031	-0.0411791	0.0653539	-0.0154041	-0.0689303	0.0599069	0.0401195
Effect_size	msp_0430	0.116905	0.159348	0.0230979	0.00630559	0.270318	-0.0414615	0.0374963	-0.114166	-0.214689	0.0128163	-0.0402745	0.0539835	0.126489	0.121578	-0.103346	0.0114736	-0.216642	-0.0320384	-0.027825	0.0292136	-0.167222		-0.19518	-0.10546	0.0375414	0.0966549	0.0840462	0.00213662	-0.061225	-0.161347	-0.082312	0.0760087	-0.218047	-0.0853446	-0.163988	-0.103323	-0.0153583	0.0570915
Effect_size	msp_0431	0.0095476	0.1138		-0.0838665	0.108824	-0.0486415	-0.0275708	-0.0393792	-0.122849	-0.0292487	-0.0571805	-0.0093659	-0.00931899	-0.0684652		-0.0331271	0.185537	0.114231	-0.0735711	0.1065	0.0210724	-0.128908		0.109308	-0.0861675	0.0656744	-0.0875529	-0.0986267	-0.128485	-0.0805038	0.104404	0.0579356	0.0719512	-0.114743	0.0406932	0.0482408	-0.000209775	-0.148631
Effect_size	msp_0432	-0.0986517	0.0496472	0.0547656		0.0857765	-0.0116835	0.119424	-0.172218	-0.1691	-0.0040705	0.00613651	0.0165254	0.132918	0.20164	-0.138474	0.0951386	-0.175954	0.338183	-0.0374066	-0.0227836	-0.134475		-0.146385	0.111574	0.015744	0.138027	0.0540505	0.0397204	-0.0586194	0.00432399	-0.154543	-0.0969325	-0.29707	-0.0513441	0.070414	0.0331571	-0.038558	0.106051
Effect_size	msp_0433	-0.100563	0.110416		0.0344013	-0.0453481	-0.0829425	-0.0584486		0.0581525	-0.00683032	0.0419093	-0.00628959		-0.158522	-0.025332	0.00620223			-0.109896			-0.0631373			-0.0318097	-0.00281292	-0.0358421	0.0383801	0.0343055			0.0635		-0.0827455		-0.0910645		0
Effect_size	msp_0434	-0.028586	-0.0279748			0.0315717												-0.066722				-0.0668905															-0.123007
Effect_size	msp_0435	-0.0504017	0.0430066	-0.0178184	-0.00397619	0.110483	0.236739	0.250212	0.152286	0.0308124	0.0522823	-0.0345258	0.00380331	0.412043	0.224864	0.0401505		0.0780972	0.114231	0.0491976		-0.0491237					-0.00513509	0.0259257	0.00436505	-0.0128005	-0.0586791		-0.158255	-0.0368015	-0.0313053	0.0437868	-0.0171986	0.150623	0.238571
Effect_size	msp_0436	-0.0985656	-0.028111	-0.398015	0.000140964	-0.0878584	0.119669	-0.144707	0.125652	0.1932	-0.0360421	0.0745129	0.149193	-0.601926	-0.394841	0.220727	-0.00214907	0.187237	-0.0591772	-0.0518538	0.00184428	0.0510879	-1	-0.449977	-0.152894	-0.160832	0.168807	0.00336365	-0.243898	-0.206494	-0.395859	-0.0759757	-0.0157674	0.134183	0.0465774	-0.223503	-0.0502187	-0.142114	0.00880956	-0.13534
Effect_size	msp_0437c	-0.0761086	-0.175963	-0.34806	0.0193891	-0.20566	0.121236	-0.271837	0.161694	0.252372	0.0703475	0.0752143	-0.0246587	-0.467898		0.344589		0.0902422	0.0917074	-0.0652886		0.165891	0.131642			0.0428486	0.158487	0.0801442		0.131766	-0.0590687		-0.050128	-0.0944461	0.254451	-0.0324162		-0.101368	0.248677	0.0743164
Effect_size	msp_0438	0.0174253	0.0213072					0.0184626		0.0463541			0.0637672	-0.00411822	0.0481279					0.0548232							-0.00124154							0.118045			-0.0664121	0.115276
Effect_size	msp_0439		0.0850902	-0.0892926	-0.0225615		-0.0207936	0.0750801	0.0398005	-0.114471	-0.0509076	-0.07488	-0.046451	0.0422024	0.144738	0.00481999	0.0523223	-0.0434357		-0.0468496	-0.142434	-0.0483168			-0.357231	0.00651034	-0.0517071	-0.0514392	-0.0356125	-0.079511	-0.00970896	-0.245612	0.0591613	-0.109425	-0.0615594	0.171516	0.0687963	0.0151423	-0.00389847
Effect_size	msp_0440	0.0301013	0.00456888	0.0147157		0.159565		-0.158909	-0.0665411	-0.0541785	0.138401	-0.0130441	0.102995	-0.365775	-0.358248	-0.0222742		-0.1364	0.323923		0.143828	-0.122325			0.318938						-0.167163	0.0476789	0.168107	-0.00656608	0.00342699	-0.0707956	-0.0778673	0.0302118	-0.0237207
Effect_size	msp_0441	-0.0326698	0.191473			-0.0290298	0.05936	0.018813		0.210144		-0.0733746	-0.0135078	-0.142968	-0.0302491		-0.0321306			-0.00192368	-0.0931954	0.0678736	-0.0823105		-0.0326077	-0.0480011	0.0043585	-0.0990806	-0.0812564	0.0238531		-0.195656			0.123197		-0.0737988
Effect_size	msp_0442	0.11916	0.0509526	-0.0426591	-0.0415437	0.227587	0.0599826	0.171217	0.0209502	0.0347807	0.0131711	-0.0140186	-0.0122683	0.0221533	0.343309	-0.0531641	0.0517659	-0.151262	0.0293898	-0.00963164	-0.116837	-0.233377		-0.348932	-0.458473	0.0294627	0.105577	-0.0392128	-0.0305079	-0.119823	-0.337184	-0.194404	-0.228166	-0.197704	-0.039019	-0.0576098	-0.0443523	0.0793108	0.394271
Effect_size	msp_0443				-0.0153893		0.0225668					-0.0743112	0.0534355							0.0185647			0.0382523							0.037719					0.0823955
Effect_size	msp_0444	0.0816744	0.131367		0.0593345	0.227501		0	0.0576338	0.0346313			0.0365798	-0.00513764	-0.00380493		0.0556378	-0.150774		-0.0171146							0.050367	-0.0143632	0.0391492	-0.0608855					-0.0736584		0.0290447		0.0292044
Effect_size	msp_0445	0.023982	-0.0724091			0.0279635		-0.0831593	0.00750623	0.0032307	-0.00683032			-0.119073	-0.110099			-0.0840244				-0.208331						0.0602789					-0.0170177	-0.0172447		0	-0.12216	0.010709	0.0958738
Effect_size	msp_0446c	0.08426	0.165062		0.0706178	0.0472574	0.130236	0.126	0.0552026	0.0898608	-0.00802573	0.103347	0.11474	0.14284	0.149215			0.117635		0.049794		0.107137	0.121078				-0.0302205	-0.0298961		0.109581	0.0868847		0.000545844	0.177624	1	0.234299	0.0383389	-0.0180858	0.0730146
Effect_size	msp_0447	0.0415872	-0.0391483	0.0742944		0.116767		-0.0261286	0.0611368	-0.0337732	0.0281668	-0.006046	0.0178394	-0.184946	-0.0872665	-0.018446		-0.155069	0.110436	-0.0310644		-0.030447				0.00647406	0.0448112	-0.00592131	-0.0127173		-0.150859		-0.0163728	-0.0738591	-0.0283479	-0.0571649	-0.168828	0.0491174	0.21693
Effect_size	msp_0448	-0.183126	-0.154249	0.00620347	0.0263635	0.0256952	0.00158934	-0.0485685	-0.114128	-0.0559759	0.135244	-0.0211969	0.184613	-0.100618	-0.0615301	0.143423	0.0452267	-0.085974	0.0267099	-0.00928902	-0.226362	0.0411408			-0.243006	-0.0592304	0.102935	-0.10427	-0.0666973	-0.110019	-0.152491	-0.223529	-0.0693293	-0.0529365	-0.0274789	-0.0653206	0.0575205	0.111835	0.0207456
Effect_size	msp_0449	-0.0441878	-0.0547866	-0.102279	-0.0385803	-0.0632677	-0.0292143	-0.0554297	0.126274	-0.0803459	0.0126423	-0.0729221	-0.0720384	-0.135879	0.0937542	-0.136841	0.0318994	-0.392206	0.238508	-0.0150032	0.104956	-0.292034			-0.315908	0.0244407	0.130537	0.0670083	0.0976527	-0.138231	-0.0931906	-0.124453	-0.143723	-0.280418	-0.126648	-0.00185683	-0.114548	-0.00338955	0.209038
Effect_size	msp_0450	-0.160277	0.0595271	0.0802764	0.01462	-0.171707	0.0178561	-0.176193	-0.125099	-0.103219	0.226837	-0.0309759	-0.00447166	-0.275985	-0.166971	-0.0654137		-0.173567	0.120039	0.0293171	0.0716335	-0.0907794	-0.0259214		0		0.02191	-0.0391238	-0.0522825	-0.074307		-0.0700502	0.0428672	-0.0927497	-0.0107877	-0.0348197	-0.0994573	-0.0215621	0.0838241
Effect_size	msp_0451	-0.0446492	0.130303		0.112907	0.0396424		-0.0513438		-0.0676906	0.0957762	0.0295982	0.0102553	-0.0839816			0.0216299	-0.15809		-0.0340639		-0.0672717				0.0109599	0.0406885	0.00424118	0.0187252	-0.0105456			-0.070571	-0.0530802	-0.0693321		-0.0998351		-0.0230411
Effect_size	msp_0452	0.198412	-0.00498166	0.0854864	0.00146818	0.0661716	0.0846024	-0.0634851	0.00291536	0.0200437	0.134598	0.0485033	0.0846814	-0.367822	-0.0402452	-0.0666984	0.0446666	-0.0149125	0.0249188	-0.00930789	0.25261	0.0215811			0.0893077	0.00561146	0.100274	-0.0669117	0.0147031	-0.132385	-0.286726	0.0920512	0.108863	-0.168148	-0.0449553	0.172149	-0.109198	0.0531952	0.102922
Effect_size	msp_0453	-0.00957743	0.120165	0.057087	0.0172122	-0.0072952		0.02655	0.147482	0.13464	0.0811991	-0.0131859	0.119369	-0.204072	-0.198982	0.10046		-0.155176	0.264086	-0.0116906		-0.0316035						0.0254586		-0.0310525			0.159432	-0.0930684	0.0211843		0.0351451	-0.00256606	0.130315
Effect_size	msp_0454	0.0947171	-0.0471216	-0.168465	0.0371617	-0.0919669	-0.0717786	-0.173562	-0.0491155	0.030035	0.0220222	-0.0828299	0.0257495	-0.207508	-0.166604	-0.0470704	-0.0330536	-0.107778	-0.0828626	-0.113646	-0.0331088	-0.279794	-0.116563		-0.0178107		0.122155	-0.0199445	-0.185603	-0.0623842	-0.189669	-0.136812	0.121281	0.00942802	-0.140257	-0.199971	-0.0120347	-0.0718167	0.0541771
Effect_size	msp_0455	-0.00751651	0.0188414	0.166376	0.152541	-0.168074	0.0114146	-0.0240994	0.0214945	-0.0509181	-0.0160515		-0.0453072	0.0210409	0.0722104	-0.0191366	0.0688688	-0.128738		-0.0178257	-0.00261891	-0.129074		0.0578799		0.0545087	0.0638939	0.00370989		-0.00440782		-0.220158	-0.0240761	-0.0922359	-0.0225578		-0.131092	0.0140889	0.0497697
Effect_size	msp_0456	0.0276078	0.0615461	-0.0848245	-0.0143137	0.0169643	-0.0054054	-0.129636	-0.202769	-0.282276	-0.0248643	0.0330767	-0.00146739	-0.403815	-0.247305	-0.0129369	0.0211908	-0.0530672	0.00298613	-0.131739	0.184303	-0.145031	-0.210708		0.0173576	0.00836033	0.182528	0.122679	-0.0350278	-0.16231	-0.230048	0.0280752	-0.148182	0.0245574	-0.0430737	0.0606554	-0.0468957	-0.17175	-0.0599443	-0.00448096
Effect_size	msp_0457	0.00957453	0.0155444	-0.0608554	-0.0394122	-0.0045392	-0.170836	-0.16882	-0.164398	-0.294325	-0.119586	-0.0546119	-0.144116	-0.435135	-0.120114	-0.124928	-0.0255573	-0.326447	-0.124596	-0.128372	0.0617497	-0.206075	-0.152707	-0.462237	0	0.0579509	0.146241	0.0161183	0.0940668	-0.049668	-0.273768	0.0957575	-0.05204	-0.254637	-0.162025	-0.210761	-0.0717035	-0.0912361	-0.135954
Effect_size	msp_0458	0.0310878	0.0159543		0.0575903	0.210535	0.0249523	0.0259952	0.0523458	-0.0455067	-0.0105559	-0.0508466	0.0214091	-0.160713	-0.112429			-0.0458488				0.011014	0.00868385			0.0329668				-0.0230769			0.0709597	-0.00678193	-0.0420216	0.171516	-0.0318501	-0.0277219	-0.0910089
Effect_size	msp_0459	0.0275349							0.0576338				0.0922447	-0.0590834						0.0668621															0.0593257		-0.116518	0.0110107	0.0292044
Effect_size	msp_0460	0.0796325			-0.0567834	0.018959	0.00273254	-0.0326602	0.0240216	-0.027263	-0.00683032	0.0382522	0.10868		-0.0560033	-0.014058	-0.0184357	0.0748059		-0.0104724			-0.0255617				-0.0939896	-0.0863099	-0.0605208	-0.0235321	0.0315032		-0.0170177	0.00313665	0.01356	0.244712	-0.0419636	0.0168946	0
Effect_size	msp_0461	-0.0393507	-0.00955308	0.150638	0.0138674	-0.0468043	0.0214869	-0.106116	-0.037371	-0.0956524	0.0467459	0.0218941	-0.0202895	-0.316723	-0.235095	0.00759789	0.0380962	-0.123168	0.21146	0.0104943	0.06708	-0.0126497			0.0669808	0.0200701	0.0636947	-0.0546487	-0.00975314	-0.0963531	-0.148054	-0.0797091	0.126804	-0.0918899	-0.0668857	0.273146	-0.048719	-0.0526689	0.0761549
Effect_size	msp_0462	0.197407	-0.046104	-0.0286868	0.0485508	0.287273	0.0807825	0.0379784	-0.0277986	-0.117759	0.0546861	-0.0108713	-0.0913775	0.0946124	-0.113051	-0.0372211	0.036039	0.0520944	-0.0771483	0.0315614	-0.217103	-0.0722462			-0.0479362	0.0495761	0.0883024	0.119117	-0.0554475	-0.0240048	-0.216928	-0.0493565	-0.0418565	-0.033762	-0.0368778	-0.11441	-0.104312	0.096073	0.0828341
Effect_size	msp_0463	0.0184899	0.0369329	-0.169669		0.0369589		-0.0864411	-0.0892279	-0.195045	-0.000725168	0.00634793	-0.0415518	-0.174297	0.018742	-0.135928		-0.212242	0.121405	-0.0122083	0.0717063	-0.326978			-0.0121503		0.0656394	-0.0222383			-0.193458	-0.0689011	-0.0857538	-0.173658	-0.0355547	-0.0997255	-0.00624428	0.0787684	0.15358
Effect_size	msp_0464	0.0518101	-0.0447095	0.0543382	-0.0702124	-0.024332	-0.0329391	-0.0388303	-0.0339027	-0.123857	-0.115181	-0.0126644	-0.0901748	-0.126141	-0.0367864	-0.0890878	0.0019942	-0.189933	-0.0544229	-0.0798109	0.0429801	-0.147871	-0.245701		-0.0326077	-0.119511	0.0811822	0.0284696	-0.187138	-0.194698	-0.135694	0	-0.0828004	0.0156381	-0.0147589		0.141744	-0.0141729	0.0750646
Effect_size	msp_0465	0.111989	-0.036132		0.0647504	0.0297676		0.115415	0.287782	0.166808	0.11623	-0.0129023	0.00583584	-0.0956585	-0.0558977		0.125553	0.0174411		-0.00478247		-0.0668905					-0.00488254						-0.149925			0.101384	-0.0914543	0.0113124	0.123777
Effect_size	msp_0466	0.0275349	0.014567	0.198502		-0.0269562		0.037495	-0.0193701	-0.0028821	0.113793	-0.0200975	0.051325	-0.160713		0.0183482	0.0688688	-0.217048				-0.221814						0.00390014	0.0497545		-0.0133672		0.0635				-0.0260113		-0.115581
Effect_size	msp_0467	0.196833	0.189337	-0.107165	-0.00888453	0.211447	0.2178	0.111607	0.166199	-0.0461012	0.0130347	-0.0395639	0.164965	0.244077	-0.145649	0.181514	0.00659526	0.195544	0.102893	0.000755794		-0.0215994	-0.00661608			-0.00352549	0.0379946	-0.00654278	-0.008425	-0.0684954	-0.214113		-0.16205	-0.0220275	-0.0121714	0.149552	-0.0097586	0.13519	0.0402919
Effect_size	msp_0468	-0.0380343	-0.0863898	-0.442885	-0.0687308	-0.185424	-0.0646833	-0.243819	-0.20458	-0.157975	-0.143433	-0.116069	-0.0350453	-0.349705	-0.241866	-0.0502267	-0.00898486	0.0957784	0.0296089	-0.079961	-0.0977492	-0.145825	-0.291515	-0.143772	-0.340277	-0.191137	0.113811	-0.154542	-1	-0.267834	-0.238094	-0.149491	0.000432184	0.166482	0.00856157	-0.13974	0.0244146	0.0198681	-0.235266
Effect_size	msp_0469c									0.00115542																											-0.00993299
Effect_size	msp_0470				0.0339603							0.00530549					0.018957			-0.0383719						0.00907066	-0.0410508	-0.0406175	0.29007	0.0306689					-0.0470742
Effect_size	msp_0471	0.0626304	0.203446	0.0540937	0.0340897	0.356255	0.0715565	0.059531	-0.00379664	0.0469466	0.00899348	-0.0236655	-0.00159949	0.0156964	0.152802	0.0185834	0.0683731	0.0845264	0.0778165	0.0245145	0.0175282	-0.0705989		-0.116311	0	-0.0318267	0.0244796	0.00856601	-0.0293289	-0.118497	-0.231321	-0.0530496	-0.224449	-0.265396	-0.0250767	0.0773617	-0.0758211	0.0639476	0.148185
Effect_size	msp_0472	-0.0776119	-0.054106	0.14187		0.136246		-0.0835284	0.094677	-0.0727015	0.223087			-0.0446407	-0.036866	0.106013		0.0679899				0.0612054									-0.0148949		0.0687763					0.207617	0.174365
Effect_size	msp_0473c	-0.00127856	0.0141387	-0.138753	0.00434812	0.122429	-0.0658153	-0.228051	-0.178529	-0.291254	-0.0302444	0.0268635	0.0572678	-0.388223	-0.193743	-0.155243	0.0514433	-0.252401	-0.0207996	-0.191672	-0.0481543	-0.204934	-0.213602		0.0255787	-0.085415	0.168992	-0.00728967	-0.161939	-0.136373	-0.144637	0.00169187	-0.0738824	-0.237179	-0.146367	-0.125921	-0.119491	-0.129784	-0.16295	-0.107177
Effect_size	msp_0474		0.0850902	-0.125906	0.0339603	0.0214869		0.0942099	0.0552026	0.00264164	-0.119522	0.00530549	0.0296093	0.137754	0.0875134	-0.0409167		0.0748059			0.117851	0.0655728			0						0.061914	-0.0112885	-0.0270843	-0.019989			0.0509198	0.0104464	0.165717
Effect_size	msp_0475	0.0199146		0.00334995	0.112025		0.0214917			-0.0706516	-0.0089319	0.0636609	0.0526581			0.0738507	0.0247947		0.120039	0.0100177								-0.0351188	-0.0264202				-0.0738533	0.105391	0.0525878		0.00327026	0.0586267
Effect_size	msp_0476			-0.0321106			-0.00329242		-0.0712283	-0.125132	0.0248769	0.0381038									-0.126307				-0.136635	0.0370941			-0.00255522	-0.0200604		-0.171305	0.030246		-0.0387586				-0.0987718
Effect_size	msp_0477	-0.0316077	0.0933212	0.0241754	0.0916128	0.124382	0.12311	0.00226029	0.0366355	-0.00733317	-0.0421154	0.00265128	0.00145998	-0.255826	-0.150536	0.0541112	0.0531518	0.0230945	-0.0681006	-0.0490848	-0.0240272	0.0166111	-0.211849	-0.195283	0.255208	0.073461	0.144793	-0.0436977	-0.031799	-0.209172	-0.305001	0.108952	0.0407979	-0.0741834	0.0696948	0.0538991	0.120902	-0.0811758	0.104932	-0.0953896
Effect_size	msp_0478	0.0874008	0.249235	0.141668	-0.0293574	0.340723	0.0557576	0.30213	-0.123013	-0.140732	-0.016176	0.00165547	0.203856	0.413505	0.417726	0.150286	0.059276	0.108021	0.0325948	-0.00171661	0.322757	-0.0189466	-0.255262	-0.449977	0.441694	0.0612807	0.0609722	0.0941553	-0.0185579	-0.207124	-0.141643	0.254667	-0.221085	-0.0833866	-0.0817849	0.279948	0.0549648	0.163728	-0.0256526
Effect_size	msp_0479	-0.149777	0.0850902		0.0141321	0.116755	0.0289011	0.0942099		0.00316997	-0.0133762	0.0414324	0.00491094	0.159513		0.021907	0.00788932	0.0589336		-0.0378094	0	0.0479227	-0.0664282	0.434099	0	0.0324596	0.0438593	-0.0436879	0.00587138	-0.00718029	-0.00168309	0.0727005	0.196615	0.105292	0.0123586			0.0783253	-0.0459911
Effect_size	msp_0480	0.0259356	0.0819115	-0.0237505	-0.0290901	0.0303913	0.111175	-0.189589	-0.190998	0.0221354	0.0485127	-0.0121667	0.111737	-0.364232	-0.113533	-0.0585023	0.0377489	-0.223725	-0.144244	-0.0102675	-0.00945815	-0.265804		-0.162835	0		-0.0326023	-0.0166499	0.0332888	0.0201336	-0.0789464	-0.134155	0.137002	0.0591025	-0.0519876	-0.0841188	-0.0635541	-0.0220311	-0.0918433
Effect_size	msp_0481	0.0750232	0.161624	0.0530094		0.0261594	0.00848489	0.0349735			0.116711	0.00380054	0.157708					-0.0861253		-0.0634042		-0.0891136					0.132745	-0.0413346	0.0433488				0.064927		-0.0838839		-0.064654
Effect_size	msp_0482		-0.0443469		0.0178025		0.0109691	-0.00110978	-0.0272013	0.00412256		-0.0112317		-0.0505499	-0.0419426	0.012231		0.011761		-0.00874104		0.00700965	0.00398887			0.0206849	-0.0244291	-0.0522327	0.0431686	-0.0524885				0.0084167	-0.0323938		0.0839872		-0.063484
Effect_size	msp_0483				0.0580201							-0.0507581																						0.271353
Effect_size	msp_0484	-0.0145106	0.133954	-0.0353724	-0.0448009	0.0224005	-0.068275	-0.0558074	-0.184168	-0.423956	-0.0841744	-0.060901	0.0184284	-0.32685	0.074188	-0.0158483	-0.00828525	-0.185991	-0.0623988	-0.233189	0.220144	-0.0485184	-1	-0.650945	0.22118	0.035931	0.0375432	0.169291	-0.0653397	-0.151498	-0.297283	0.163319	-0.0293574	-0.155749	-0.119054	-0.109432	-0.0455889	-0.0764499	-0.229645
Effect_size	msp_0485				0.0160647							-0.0378511								-0.0654969			-0.00850847			-0.00612456		-0.058715		0.074076				0.233921	0.0380164
Effect_size	msp_0486	-0.0106212	0.098786		-0.0349203	0.0592515	-0.0026053	0.00737216	-0.169679	0.0281677	-0.00415942	0.00801876	-0.130013	-0.269931	-0.213077	0.235014	-0.00860539	-0.0347598	-0.0346421	-0.00503789	0.215529	-0.119289	-0.0449432	0.548844	-0.0326077		0.103358	-0.0623148		0.0301797	-0.107388	0.0684535	-0.0258879	0.135111	0.0442137		-0.0340659	0.133849	-0.164527
Effect_size	msp_0487	0.283937	-0.00155718	-0.0826886	0.0449985	0.109829	0.0548444	0.182331	0.0581102	0.153195	-0.0358958	0.023538	0.0504182	0.189368	0.029014	0.0461652	0.0751501	0.0265903			-0.102071	-0.0806365				0.0614745	0.00773332	0.00884192			-0.0063352	-0.140339	-0.307718	-0.0421651	-0.0173188	-0.044105	-0.0981394	0.241971	0.0924236
Effect_size	msp_0488		0.158474		0.189153	0.018959	0.128778	-0.111639		-0.0569958	0.142763	0.0906114		-0.0449332	-0.127131		0.00522161	0.011761		0.0614554						-0.00863206	-0.0358236	-0.0213785	-0.0290719	0.12317	0.0692473		0.069868	0.0911981	0.0866261		0.0464707
Effect_size	msp_0489	0.228223	0.0923422	-0.159386	0.109444	0.123588	0.0442935	-0.103859	-0.143577	-0.034356	0.103974	0.0862452	0.0301386	-0.264137	-0.252666	-0.0599113	-0.00302939	-0.227402	0.100014	-0.0644812	0.163627	-0.248613	-0.0722662		0.0942503		0.0205108	0.0134138	-0.0411815	-0.0526757	-0.273136	0.12006	0.24353	-0.124152	-0.00427851	0.136618	-0.189734	-0.189596	-0.129146
Effect_size	msp_0490	0.185423	-0.00106463	0.118129	-0.0599146	0.220108	-0.0831605	-0.193097	-0.0170607	-0.0129499	0.113533	-0.0427785	0.0220842	-0.479089	-0.167436	-0.0617149	0.0315802	-0.230528	0.323944	-0.0897907	0.00817878	-0.121406	-0.135165		-0.119602	-0.00710849	0.114403	-0.0835657	0.0595581	-0.128184	-0.260405	-0.0944481	-0.0345482	-0.133803	-0.0709084	0.0260832	-0.0964717	0.0702298	0.208468
Effect_size	msp_0491		0.00778592					-0.0778936	0.149352	0.0383155			0.0756999		-0.131232			-0.0882259				-0.0297026															-0.115952	0.0828193	0.107505
Effect_size	msp_0492	-0.0675049	0.037653	-0.0582001	-0.0460595	0.26675	0.110909	0.132154	0.195575	0.0947473	0.0581115	0.019497	0.0749383	0.20229	0.106126	0.0662915	0.0412779	0.00431222		-0.00088624		-0.149471				-0.00547499	-0.0250802	0.080221	-0.029065	0.0992934	0.0226298		-0.131024	0.00299076	0.10107		-0.114779	0.0538162	-0.0138247
Effect_size	msp_0493		0.0314502	0.057087		-0.0290298		0.0240235	0.101025	0.10242	0.113793		0.0255625	-0.0573953	-0.00228296			0.011761								0.0440862	-0.00530345	0.0250318	0.0037765	0.0797835					0.00610467		-0.0664121	0.201228	0.147969
Effect_size	msp_0494	-0.144984	-0.0692947			0.0412138		-0.0792733	0.0101755	-0.0807536			0.051325	-0.157088	-0.0673075			-0.177416		0	0	-0.0225223								0.0130038		-0.0911695			-0.00458176	0.509387	-0.191776		0.0147103
Effect_size	msp_0495											0.00357698								0.0511743								-0.00416936	-0.010348						0.0454998
Effect_size	msp_0496		-0.0692947				-0.0775297										-0.0258457	0.0699797		-0.0263254		0.00420579				-0.0168634	-0.0379271	0.0921571	0.0111767	0.0184112					-0.079668		0.000787638
Effect_size	msp_0497	0.000398646	0.0654804	-0.154613	0.0491188	0.100637	0.147484	-0.129925	0.00275504	0.198097	0.0395138	0.0146645	0.0543816	-0.203245	-0.104598	0.202238	0.0515381	-0.142605	-0.0460501	0.0688097		0	0.144596				0.0292796	-0.0849324		0.0676281			-0.0445611	0.0888345	0.174669	0.132315	0.0212561	0.000490146	-0.00520018	0.084566
Effect_size	msp_0498		-0.102143				-0.0225106	-0.00480906		-0.0551228		0.0561836	-0.030766		-0.0833338		0.00997444	-0.0410226		0.0437804		0.011014				0.0355232	0.0634816	-0.016644	0.0350263	-0.0626158				-0.0560355	-0.0637937		-0.00839308		-0.100967
Effect_size	msp_0499	0.0174253	0.211694			0.0798319		0.0740516		0.0306843							0.108336										0.102993								0.00367473		0		0.0699409
Effect_size	msp_0500	0.1159	0.065624	-0.0198875	0.0849083	0.260986	0.194672	0.170065	-0.012742	-0.0513757	0.113149	0.0714497	0.0490186	0.108758	0.0348332	0.0385153	0.0360549	0.0443142	0.00397824	-0.012122	0.0854603	-0.249183	0.000145236	0.0578799	0.111635		0.00123197	0.0473523	0.0138659			0.0187645	-0.0698827	-0.0517417	0.0077658	0.087133	-0.127563	0.118728	0.150101
Effect_size	msp_0501		-0.0988214		-0.013464	0.164547	0.00540733	0.016424		0.154673		0.00691727	0.0530028	-0.186473	-0.0626881					0.0132723			-0.0212811				0.0422977		0.00645191	-0.00774328					0.0302704		0.134874		0
Effect_size	msp_0502			0.0530094	0.138794		0.0543117				0.0429425	0.0852062	0.0538682				0.0506213		0.114231	0.0918359						-0.00144199	-0.0534682	0.0174724	-0.00245735	-0.0471627					-0.0637074		-0.0470737	0.120655
Effect_size	msp_0503	0.0365977	0.0299066	-0.0803183	-0.0305595	0.0822877		-0.0779299	0.120671	0.0386765	0.0542459	-0.0253347	-0.00666981	-0.128315	0.00710864	0.00570016		-0.0983851		-0.0137185	0.1065	-0.052739						-0.0112896	0.0290903			-0.0911695	-0.152999	0.000621758	-0.0204125	0.0778023	0.0662488	-0.00226711	0.0201288
Effect_size	msp_0504	-0.0306279	-0.122617		0.00274076	0.0297676	-0.0521645	-0.0805203	0.0393191	-0.0863805		0.00736224	-0.0395164	-0.248354	-0.116699	0.012465		-0.0580568		-0.0255625		0.0907395				0.0862127	0.0572792	-0.0127814	-0.0505364	-0.0584516	-0.0527442			-0.0662564	-0.0790561		-0.154806	-0.0331007	-0.0393316
Effect_size	msp_0505		-0.037653	-0.0179866	0.0354244		0.0320788	0.0040692		0.0308144	-0.16319	-0.00551565	0.036459	-0.0803565	0.0279777	0.0984832	0.0525481	0.0645148		-0.00982102		-0.0911162	0.014666				-0.00875412	0.0467069	0.0327696	-0.016752			-0.180277	-0.0311418	-0.0353873		-0.079599	0.12092	0.0168427
Effect_size	msp_0506	-0.0141295	-0.0332542	-0.433242	0.0420254	0.0155811	0.187594	-0.130767	-0.0878666	0.0208696	0.028589	0.0961932	0.164799	-0.54189	-0.566597	0.103409	0.0260403	0.325502	-0.0384622	-0.0695469	-0.0461069	0.250026	-0.266658	-0.492925	-0.118918	-0.188396	0.106693	0.0126087	-1	-0.136523	-0.337169	-0.0726386	0.053782	0.0739581	0.091591	-0.11754	0.110056	-0.265688	-0.237864	-0.0420769
Effect_size	msp_0507	-0.20758	-0.0749712	0	-0.0444229	-0.0477131	-0.0537314	-0.115392	-0.0139619	-0.0621651	0.144976	0.0450066	0.0765609	-0.289041	-0.119178	-0.0122907	0.0725454	0.016529		-0.0686802	-0.0327693	-0.260257				-0.0912342	0.0308531	-0.100733	-0.141451	-0.103897	-0.0300182	-0.0316788	0.206866	0.0732274	0.0122508		0.00802427	-0.0236955	0.0115748
Effect_size	msp_0508		-0.0443469	0.057087	0.00308335	-0.0290298		0.0350244	0.0206443	0.0231866	0.0448096	-0.0288248		-0.134466	-0.128498			-0.0302177				-0.0871111						0.0419688	0.25585				0.0941838			0.116116	-0.00852773	0.183474	-0.0778823
Effect_size	msp_0509	-0.0618117	0.122532	-0.325997	0.0387453	0.121496	0.0469947	0.00500583	0.0640726	0.104478	-0.0917401	0.0802328	0.0303703	-0.138608	-0.0681817	0.201277	0.0785871	0.0015539	0.275362	0.0270376	-0.0915361	0.181323	-0.181	-0.455661	-0.403685	0.0267129	0.152571	0.0618154	-0.0204978	-0.128067	-0.190672	-0.0742989	-0.0575789	-0.073368	0.0736898	0.172729	-0.0585885	3.52497e-05	-0.0460401	-0.112974
Effect_size	msp_0510	-0.121296	0.0694912	-0.104781	-0.0118577	-0.178421	0.0276886	-0.0601857	-0.124985	0.0197926	-0.149046	0.0908115	0.102012	-0.132059	-0.153137	0.186124	-0.0131842	0.25166	-0.148623	0.0629149	0.160657	0.188436	-0.0530849	0.235219	-0.136635	-0.0811748	0.0689914	0.0545438	-0.083717	-0.00710435	0.0106614	0.145104	0.10862	0.193358	0.25135	0.0306241	0.0856929	0.213499	-0.0924418	-0.0354395
Effect_size	msp_0511	0.032206			0.0684556			-0.0497008	0.0249155	-0.0626391		0.0221592		-0.129193	-0.0795744			0.0604354		-0.0374094		-0.046016					-0.0152373		0.212061	-0.0230121				0.00153185	0.0215385		0.000211715	0.0145272	-0.0103685
Effect_size	msp_0512	0.00073443	-0.0487895	-0.0742944	-0.00822801	0.207811	0.0906986	-0.269267	-0.0656004	-0.017355	0.0757688	0.0480711	-0.0377658	-0.462202	-0.286501	-0.0936684	0.0602599	-0.135474	0.209597	-0.0225759	-0.054622	-0.157045	-0.104344		-0.159469	-0.0681115	0.0420484	-0.053832	-0.0824951	-0.0729537	-0.256015	-0.19335	0.103773	-0.064114	0.0435124	-0.00625526	-0.0296131	-0.11344	0.162039
Effect_size	msp_0513		0.0897526	0.137348		0.144666		0.077137	-0.0272013	-0.0451721			-0.00742488		-0.00106727			0.00882076				0.109139					0.0413211				0.00289594		-0.0170177		0.0143907		-0.0628115		0.10371
Effect_size	msp_0514																																				-0.0742134
Effect_size	msp_0515		-0.000911988		0.0593345		-0.0244205	-0.0414524		0.0764023		0.0294155			-0.0981672	-0.00953025	0.0741078	-0.0563238		-0.0138876	-0.155995	-0.122411	-0.0100051				0.0474449	0.00900248							-0.0644801		0.00299303		0.0712461
Effect_size	msp_0516	0.0174253	-0.0212283	0.00334995		0.018959		0.0278973	0.147263	0.16468	0.0291778		0.0750857	-0.112333	0.00148082		0.200658	-0.120871		0.0369763		-0.0685421					0.0294412		0.0860843				0.0687763				-0.0604444		0.0272575
Effect_size	msp_0517						-0.0187428					0.0292328					0.0319066			-0.00380048							-0.0279953			-0.0163315					-0.0274689	0.234299		0.195568
Effect_size	msp_0518	0.148838	0.0940206	-0.160637	0.153379	-0.00038265	0.036503	0.00408462	0.027567	-0.070732	-0.0218373	0.0292328	-0.0374328	-0.175176	0.080215	0.0592367		-0.211498	0.100833	-0.0265063	0.0142434	-0.278947			-0.191289		0.0239333					-0.0824111	-0.0124587	-0.120369	0.00658346	0.0458531	-0.096597	-0.0231582	0.103123
Effect_size	msp_0519		-0.0279748					-0.0778067							-0.0560033																						0.0264486
Effect_size	msp_0520c															0.0503175
Effect_size	msp_0521	0.0661807	0.074847	0.124427		-0.0112847	-0.0356998	-0.118408	0.0739115	-0.113471	0.028292	-0.05918	0.0345865	-0.20489	-0.0192303	0.013736	-0.00133247	-0.227591	0.100833	-0.0200513	-0.111894	-0.158853			-0.427701	-0.00875082	-0.0190342	0.01403	-2.38888e-05	-0.0606336	-0.149577	-0.399064	-0.00633977	-0.0537592	-0.0166734		-0.0809362	0.114294	0.046997
Effect_size	msp_0522	-0.0690781	0.0309591	0.0697665	0.0781807	0.135092	0.176569	0.0831419	0.0173346	0.106993	0.108183	0.102965	0.189517	0.292839	0.184035	0.19043	0.00873889	0.153969	0.0761126	0.115304	-0.181769	0.118384	-0.0705879	-0.242124	-0.106864	-0.0195979	0.0541609	-0.148272	0.00993187	-0.188323	0.108862	-0.0850696	-0.108164	0.155031	0.156355	0.174777	0.0505107	0.244175	0.05047	-0.0535405
Effect_size	msp_0523															0.125348		0.011761																-0.126101			-0.0105173	0.112273
Effect_size	msp_0524	0.28325	0.197774	-0.268285	0.00451084	0.194981	0.207364	0.186785	0.188638	0.0529979	-0.0379572	0.029709	-0.0634187	0.206771	-0.0113613	0.125053		0.0804357	0.0962867	-0.0216548	0.00971591	-0.125042			0.29025		0.00779067	0.00851164			-0.176362	0.0182258	-0.164661	-0.018597	0.0890513		0.0217764	0.0384064	0.189567
Effect_size	msp_0525		0.176014		0.0598739		-0.0165742	0.0730231				0.0773411	0.0907171	-0.00411822	-0.00106727					0.0546695							-0.0252879	0.119824		-0.0342627					0.0928682
Effect_size	msp_0526	0.0972586	0.00995471	-0.173937	0.0164472	0.137652		0.0631947	0.0486417	0.0751194	0.120169	-0.037376	-0.0280962	-0.115	0.0525512	-0.0452512	0.153281	-0.0358354	0.21146	0.0117444	0.0809587	-0.138313					0.0420666	0.00863866	0.0174361			-0.119352	-0.299145	-0.101022		-0.137633	-0.0378877	0.0455771	0.265663
Effect_size	msp_0527		-0.11916			0.0349404		-0.0402788	-0.0271367	0.10643	-0.0616132			-0.238214	-0.0942758		0.0753925	-0.181637	-0.0528172		-0.00351039	-0.0616325			-0.0326077	0.0606381	0.0986189				-0.0807568	-0.0911695	0.0128141	-0.0844945			-0.0656229	0.141387	0.0427017
Effect_size	msp_0528		-0.00455994	0.0530094			0.122286	0.0334191		0.00266754	0.113793			-0.0968812	0							-0.0506176											-0.0150156	0.051755	0.0299231		-0.0606871
Effect_size	msp_0529	-0.0063873	-0.042471	-0.040868	0.0335192	0.0266228	-0.107408	-0.0491737		0.069159	-0.0173891	-0.0202802		-0.166813	-0.123895	0.00423858	0.0126874	-0.0632559		-0.142315	-0.301775	0.0711555	-0.0895087			-0.0319497	0.116916	0.0114243	-0.0688673	-0.0713767		-0.277956	-0.0711184	1	0.169768		0.0303468	-0.00333398	-0.0390227
Effect_size	msp_0530	0.0221415	-0.0506201	-0.187718	-0.0628982	-0.0621294	0.0478083	-0.152213	-0.0284538	0.076533	0.0107446	0.0449111	0.110829	-0.478977	-0.410239	-0.0191517	0.0292642	-0.192386	-0.0632026	-0.0431982	0.123947	-0.251801	-0.2565	-0.193649	-0.301285	-0.154596	0.0546365	0.00296788	-0.236622	-0.129419	-0.272724	-0.111966	0.120392	0.0238435	0.0467496	-0.123922	-0.0429611	-0.220682	-0.0529355	-0.0262211
Effect_size	msp_0531
Effect_size	msp_0532	0.124351	-0.152604			0.0214869		-0.14378		-0.0749726		-0.00900378	0.138962	-0.141912	-0.134068					0.0194047								0.0302839	0.00785325					0.0549517			-0.0823331		0.0518425
Effect_size	msp_0533	0.0438996	0.0490447		0.0339603	-0.125637	-0.0370121	0.0524542		-0.0615382			-0.00999019	-0.133148	-0.0833338	0.00575112		-0.264499	0.110515	-0.059634	-0.132784	-0.19962				0.00312782	0.00828158					-0.240172	-0.0334717	-0.0439025	-0.0551714		-0.0502419	0.0621478	0.0338336
Effect_size	msp_0534	0.0661542	0.0954604	0.0634117	0.0424544	0.147159	-0.0155898	-0.0242512	-0.101049	-0.097585	0.0955809	0.00950777	-0.0147947	-0.350768	-0.0583984	-0.0780852	0.0223009	-0.217063	0.199616	-0.0446931	0.0973479	-0.099573			-0.133962	0.118445	0.15355	-0.0276177	0.0279002	-0.132052	-0.269451	-0.0550821	0.0963946	-0.123339	-0.0445672	-0.16217	-0.0387252	-0.0994001	-0.0160991
Effect_size	msp_0535	0.124351	0.0190169		-0.011279	0.130797	0.0118494	-0.0250442	0	-0.0639825	-0.0597461	-0.0204487	0.119773	-0.187596	-0.108802	0.0386897		0.062324		-0.0178257	0.0737309	-0.0483168			-0.0326077		0.0638098		0.0489278		-0.00166214	-0.0569972	0.069868	-0.0734381		0.171516	0.0472423	0.0214115	-0.0420874
Effect_size	msp_0536	0.0765744	-0.041	-0.182117	0.0383223	0.0701701	0.200265	0.119776	0.110356	0.071856	-0.00155993	0.015107	0.035898	0.181649	0.0557776	0.130394		0.0532229		0.0701429		0.0588311				0.0616836	0.00763289	0.0431394			-0.110312		-0.161602	0.0440361	0.00512013	0.136958	-0.0564078	0.172199	0.269528
Effect_size	msp_0537		-0.0579533					-0.191124				0.00803664	0.0729215	-0.0912637	-0.182141	0.00599248			-0.158595		-0.0427205	0.0678736			0							-0.130132		-0.0309548			0.0036357	0.153575
Effect_size	msp_0538	-0.0643701	-0.0450414	-0.067352	0.176067	0.0226722	0.06765	-0.16125	-0.110567	-0.0215689	0.0833944	0.11219	0.238738	-0.222987	-0.26327	-0.0358494	-0.00518347	0.00919781	-0.0528172	-0.0352517	0.154303	0.0246849	0.011008		0.194405	0.159807	0.0344417	0.0430995	0.142552	0.0261028	-0.098924	0.150084	0.191965	-0.0383486	-0.0138579	0.0523199	0.124223	0.029979	-0.134138
Effect_size	msp_0539		0.0874214			-0.0269562		0.0197814	0.0281993	-0.0287367								0.013654		-0.0066804							0.133765		0.100057		0.00556912				0.0328566		-0.0960269
Effect_size	msp_0540							-0.0791255	0.0576338	-0.0406781								-0.0563238		0.0272041		-0.122411					0.0205332								-0.00472956		0.0253974		0.105812
Effect_size	msp_0541	0.204825	0.0450972	-0.169669	-0.00131846	0.240576	0.171018	0.175499	0.329065	0.220292	0.0797223	0.0527517	0.154922	0.119913	0.185692	0.119004	0.0576224	0.154408	0.114231	0.0109835		-0.0632487				0.00218933	0.0711134	0.0256825	-0.0166603	-0.0407123	-0.163796		-0.250542	-0.164315	0.0726085	0.202253	-0.115357	0.137612	0.339373
Effect_size	msp_0542	-0.0253379	-0.117612	-0.234795	-0.0497059	-0.047989	-0.0876649	-0.270978	-0.114943	0.0459375	-0.0709214	-0.0935916	-0.0101914	-0.411048	-0.242133	-0.125041	-0.0428868	-0.274794	-0.0954779	-0.111308	0.0427302	-0.155176	-0.167159		-0.0364509	-0.0916799	-0.0531666	-0.143787	-0.060041	-0.0540341	-0.148524	-0.1403	-0.189016	-0.051326	-0.0765259	-0.227914	-0.00415172	0.0645097	0.218089
Effect_size	msp_0543c
Effect_size	msp_0544c																			0.0410975			0.0244617				0.00989089	-0.0314544	0.0271532	-0.0216509					0.0282992
Effect_size	msp_0545	0.0742297	0.141852	-0.15004	-0.0389969	0.20966	0.162495	0.377265	0.0433067	0.0394183	0.0393172	-0.0608433	0.152713	0.500122	0.17208	0.0383285	0.0497392	0.0125292	0.273689	-0.0248277	0.196601	-0.0982878	-0.0495391	0.170103	0.194405	0.0886353	0.0229799	0.213814	-0.00675808	-0.0451368	-0.0589622	0.131096	-0.187368	-0.128733	0.00745954	0.246366	-0.00537076	0.228999	0.0871466
Effect_size	msp_0546	0.0753294	0.180283	0.061083	0.0190157	-0.0332294	-0.0935975	-0.0375987	-0.148646	-0.09446	-0.0147667	-0.011504	-0.0773567	-0.334643	-0.208686	-0.0967014	0.0798368	-0.238719	-0.0376774	-0.0682555	-0.206514	-0.186183	-0.138101	-0.348932	-0.0363029	-0.038794	0.0277386	0.0066724	-0.0748918	-0.0970796	-0.157766	-0.197622	0.12131	-0.0964478	-0.0441468	-0.14592	-0.0792124	-0.102975	-0.0436265
Effect_size	msp_0547	0.127904	0.0625438	0.0989459		0.128993	0.01656	0.00206278	-0.0288013	0.202076	0.196884	-0.0352153	0.106091	-0.0992855	0.0346457	0.0277183	0.00920387	-0.00862444		-0.0103775		-0.0556288	-0.0271312				0.0128587	0.0144086	-0.0428968	-0.0324613	0.0399106		0.11443	-0.0513604	0.148253		0.015756	0.115184
Effect_size	msp_0548		0.0522537				-0.0619819	-0.111724		-0.0263008		-0.0520346	-0.0342784		-0.157269		-0.0157811			-0.0120239		0.063272	-0.0564073			-0.029242	0.0449567	-0.0630507	-0.0188596	0.0284293	0.0505835			-0.00927178	-0.0594643		-0.00569468	-0.029042	-0.0258477
Effect_size	msp_0549				-0.0304944		0.0514982			0.0375787		0.0323789																0.220132						-0.00901708	0.0142001			0.0198506	0.0311514
Effect_size	msp_0550		-0.0256204		0.0593345			-0.0792733	0.151441	0.0677879		0.0484621	0.0578649	-0.161921	-0.0419666	0.120715		0.00244316				-0.112935												-0.0842461			-0.0475516	0.0140134
Effect_size	msp_0551	0.00435644	0.0180949	-0.0812381	-0.021706	0.117682	-0.0725609	-0.129554	-0.0964846	-0.0102686	-0.0521073	-0.0824318	-0.143409	-0.304191	-0.199369	-0.110865	-0.0194449	0.02728	-0.0220424	-0.121481	0.00677934	-0.00427649				-0.101631	0.00201982	-0.114857	-0.135325	-0.131096	-0.167728	0.0262847	0.110726	-0.103806	-0.0227122	-0.0315661	0.0313113	-0.127614	0.0636673
Effect_size	msp_0552	0.212419	0.122673	-0.117853	0.0106265	0.223907	0.0854201	0.109668	0.197336	0.0884076	0.0386186	0.0114623	0.12687	0.0850914	0.146931	-0.00835591	0.00102498	-0.121385		-0.0407414	-0.0546155	-0.147855		0	0.111635		-0.00247325	-0.0158205			-0.0869454	-0.0365806	-0.152081	-0.113884	-0.0143513	-0.125817	0.0513715	0.0513002	0.277964
Effect_size	msp_0553	0.0635282	0.109508	-0.0202349	-0.00718157	0.129379	0.0386882	-0.0670376	-0.191951	-0.0644529	0.146881	-0.0209781	-0.00155021	-0.387249	-0.0653206	-0.0155412		-0.10912	0.314281	0.00538463	0	-0.114548			0	-0.0177399	0.0215071	-0.0499853	-0.0388646	-0.108701	-0.185403	-0.09752	0.149478	-0.134765	-0.00930814	0.0736831	-0.0277078	-0.0793252	-0.00460976
Effect_size	msp_0554	-0.00442796	-0.141206	-0.16178	0.00548933	0.15148	-0.105918	-0.190341	-0.159688	-0.103777	-0.000610302	-0.00123929	0.0110404	-0.39591	-0.332388	-0.0950469	-0.0468671	-0.126627	-0.172452	-0.0486414	-0.035991	-0.0917786			-0.199336	-0.0405588	0.142401	-0.0851919	-0.0877026	-0.129472	-0.234322	0.0335123	0.251922	0.0147265	-0.127534	-0.0283984	-0.084177	-0.0423645	0.137316
Effect_size	msp_0555	0.12966	-0.0819537	-0.0497347	-0.0190744	0.0888059	0.105676	0.098806	0.194965	0.0141224	0.149363	-0.027737	0.0635892	-0.0583199	0.163249	0.0431182	0.0146379	0.000814442	0.114231	-0.00601576	-0.0382308	-0.134751			-0.0607516	0.00474764	0.0113899	-0.0436374	-0.0350564	0.0263876		-0.084119	0.0215691	-0.204227	-0.0780923	0.11141	-0.0103516	0.152068	0.128279
Effect_size	msp_0556		0.0738142					-0.0806969	0.0261104	0.0575651	-0.0634802			-0.0400855	-0.0607137			-0.0226633	-0.0901825			0.0545583											-0.0235449				-0.103712	0.0334992
Effect_size	msp_0557						0.0501582										0.222019			0.0427259										-0.0411699					0.0699519
Effect_size	msp_0558	-0.180792	0.113406	-0.163603	0.174275	-0.00405199	0.0184668	-0.0255565	-0.220802	-0.0849168	-0.120947	0.141982	-0.0379009	-0.230107	-0.105276	-0.0509504	0.0537049	-0.202082	-0.220424	-0.0613866	0.035211	-0.178532			-0.0479362	-0.0565911	0.0583316	0.0409016	-0.0788924	-0.0360709	-0.182683	-0.133227	-0.0377964	0.106991	-0.0678082	-0.0959137	0.0891183	-0.000866713	-0.0783283
Effect_size	msp_0559	0.032206	-0.0984947	0		-0.0676536	-0.0894627	-0.0761432		-0.167556		-0.0230421			-0.125764		0.00132639		0.0145065	-0.077367	-0.0427205					0.0541518	0.0397573	-0.0411773	0.0992811	-0.0433451	0.0103814				-0.0310474		-0.0965877	0.003673	0.123189
Effect_size	msp_0560	0.128337	-0.0783544		-0.052189	0.103304	0.246027	0.238781	0.301586	0.178177	-0.017845	-0.0318448	0.0654333	0.018638	0.102937	0.0622925		-0.0367289		2.88111e-05	0.00949559	-0.208978			-0.0607516		0.0300108	0.0588409			-0.184749	-0.125473	-0.179517	-0.0900463	-0.00641824	-0.0480756	-0.0400424	0.0657862	0.301157
Effect_size	msp_0561	-0.0307106	-0.0592571	0.159631	0	0.01539	-0.0486502	-0.190879	-0.183857	-0.228498	0.134324	-0.0635266	0.0539733	-0.228041	-0.185397	-0.00728445	0.0871961	-0.198818	0.00528651	-0.0575273	0.0968998	-0.0570652			-0.0326077	-0.0287238	0.0348767	0.0229092	-0.032788	-0.100071	-0.0130785	0.0131488	0.126341	-0.0485314	-0.109204	-0.0394623	-0.0785361	-0.0653226	-0.110614
Effect_size	msp_0562	0.0751479	0.00373816		-0.0370835	0.081259	0.0229195	-0.0920366	0.0799714	0.159031	-0.0168222	0	0.0159962	-0.0917568	-0.173791		0.00841674	0.0277286		-0.000359736	-0.202825		0.00586913	-0.09759	-0.139535	-0.00719017	-0.0509556	0.0232327	-0.0565668	-0.0908317	-0.114224	-0.130033	0.0526685	0.0579125	0.138874		-0.0605561		-0.0712188
Effect_size	msp_0563	-0.06274	0.0470976	-0.296231	-0.0105724	-0.183443	-0.0311884	-0.154654	-0.167348	-0.229775	-0.124779	-0.0188392	-0.029821	-0.422179	-0.177798	-0.0158303	0.0246879	-0.022325	-0.151006	-0.101284	0.0406104	0.0456858	-0.253101	-0.564152	-0.179051	-0.113816	0.0858945	0.047661	-0.171763	-0.160501	-0.306505	0.062745	0.00931826	-0.0757285	-0.056629	-0.10718	-0.16405	-0.158566	-0.15475	-0.119654
Effect_size	msp_0564	-0.0446492	0.13899	0	0.0168297	-0.100512		0.151552	-0.0503638	0.0249365	0.0306367	-0.0131859	0.0785945	0.114692	0.049878			0.121836			-0.166753	0.0678736					0.104068							0.051755			-0.14252	0.0852407	-0.0717977
Effect_size	msp_0565	0.0176077	-0.0914205	-0.000569427	-0.0623481	-0.0159288	0.241567	-0.000860354	0.0163989	0.0640033	-0.0268332	-0.0553	-0.0104753	0.159724	0.0864428	0.156915	0.0431919	0.159446	0.256148	0.0115793	-0.0973479	0.0347492	-0.138972	-0.048795	-0.0287617	-0.0300016	0.0737642	-0.0715714	-0.112237	-0.147711	-0.189536	-0.00458589	-0.191918	0.0786393	0.139627	-0.0836871	-0.0493208	0.015971	0.226176
Effect_size	msp_0566	0.0312188	0.0776707	-0.0115207	0.00308335	-0.00650505	0.0277172	-0.044487	-0.000483007	0.0627524	0.0510877	0.0216383		-0.334896	-0.195336	0.0279542		-0.096694	0.00890331	0.00400218	-0.0427205	-0.0804757			0.29025		0.0867674				-0.182702	-0.130132	-0.220485	0.000802399	0.101088	-0.118482	-0.177799	0.149666	0.0825358
Effect_size	msp_0567	-0.124432	0.161947	0		-0.12415		0.134997	0.06497	0.0392701	-0.0105559			-0.0573953	0.124218	0.00867896		-0.143223		0.0608658		-0.0377339									-0.0914316		-0.0722121			0.0208739	-0.106122	0.0850192	0.0189133
Effect_size	msp_0568								0.0576338	0.00205383	-0.00683032	-0.0202802																					0.138098				0.0391753
Effect_size	msp_0569	0.0776119							0.00610528	-0.171604	-0.103935						0.0495089	0.00882076		-0.0338075	-0.102071	0.063272				0.0905046			0.157947	-0.0201952	-0.0895491	-0.104511	-0.0322972	-0.0337293	-0.00366096		-0.046974	0.0991929	-0.0864042
Effect_size	msp_0570	-0.0782086	-0.00228444	-0.00504954	0.0452249	-0.100511	0.181573	-0.0190172	0.185252	0.0693155	0.0978322	-0.0251595	0.126122	0.063312	0.0291076	0.314705	0.0116641	0.0285147	-0.0795649	-0.054589		0.0816177	0.0500857			0.00358588	0.137749	0.0561461	-0.112584	1	0.173023		-0.239056	0.256172	1	0.0561336	0.0014127	0.0338939	-0.0311046	0.0732985
Effect_size	msp_0571						-0.00174559										-0.00786265			-0.0448113						-0.0449445	0.0551807	-0.0281592	0.0289015	0.00380716					0.138285
Effect_size	msp_0572	-0.019061	-0.0421855	-0.393493	-0.0728947	-0.0321128	-0.0321638	-0.102839	-0.172222	-0.268865	-0.0316797	-0.0479712	0.0862036	-0.395765	-0.213415	0.00428612	0.00648925	-0.11667	0.00295863	-0.0769364	0.11619	-0.108615	-1	-0.400975	-0.220847	-0.138706	-0.0550577	0.113978	-0.272636	-0.106504	-0.203918	-0.0309003	0.0799541	0.0413155	-0.079449	-0.0302395	-0.0516448	-0.0414151	-0.222886
Effect_size	msp_0573	-0.0455975	-0.0974882	0.00557269	-0.133994	-0.109693	0.235203	-0.00776918	0.115334	0.174762	-0.0656347	0.0175958	0.188987	-0.034083	-0.265966	0.401384	0.0558804	0.316665	0.0414525	0.0731845	-0.041224	0.213536	0.0234666	-0.0225075	-0.0371914	-0.0354561	0.15703	0.0727891	-0.189585	-0.0796662	-0.0446259	0.0838663	-0.130057	0.171651	1	-0.182655	0.0214379	0.0999232	-0.0656686	0.136756
Effect_size	msp_0574c																								0
Effect_size	msp_0575				0.0381473	0.0819055	0.0708307			-0.031684		-0.0316515				0.133613				0.0667573														0.0621213	0.0592304			0.156164
Effect_size	msp_0576	0.00171326	0.0228202	-0.0350297	-0.00211233	-0.0609584	0.0177063	0.0774623	-0.00147629	-0.0355353	0.0273646	0.0242769	-0.097106	-0.104882	-0.0735475	-0.0251992	0.0398045	-0.119543	-0.0661338	-0.0542688	0.00971591	-0.0814448	-0.17674	0.102062		-0.0780637	-0.0240153	-0.0818681	-0.0723967	-0.109085	-0.116313	-0.104511	-0.0252506	-0.0602686	-0.0542591	-0.0144166	-0.103012	0.0396585	0.142105
Effect_size	msp_0577					-0.0311033	0.0247873			0.0375787		-0.0527721				0.0675723		0.119735		0.0163396		0.00700965				0.0345073	0.0367472	-0.0145959		0.000531265				0.0287941	0.0848772		-0.00993299		0.0311514
Effect_size	msp_0578	0.0518101	0.117513	0.0691244	-0.00068406	-0.0201833	-0.0647239	-0.172313	-0.0663503	-0.192544	0.0542459	-0.0029884	-0.0157598	-0.222569	-0.21688	-0.128889	0.0751344	-0.0991642		-0.0851918	0.00504891	-0.312233			0.21927	-0.074574	-0.0117542	-0.0170983	-0.0661306	-0.0401149	-0.168434	-0.0044965	0.136217	-0.144683	-0.0813108	-0.0671651	-0.0642288	0.0538525	-0.0359204
Effect_size	msp_0579	-0.0957743	0.0241481	-0.0379489		-0.0972693	0.0483045	0.0492769		0.0368419	-0.0496022		0.22946	0.0836701		0.255408		0.0280574		0.00528141	-0.0582552	0.0195062		0.434099								-0.0700502	0.00272922	0.0239018	-0.00129717			0.141408
Effect_size	msp_0580				0.103352		0.13532					0.0635544	0.053458							0.0542894								-0.0601515	-0.0495001	0.094926				0.0805621	0.082874
Effect_size	msp_0581	-0.00562982	0.0169383	0.00797589	-0.0570446	0.0161027	0.0062035	0.032684	0.0550861	0.113068	0.162746	0.0214404	-0.000569929	-0.245051	-0.378966	-0.0283147	0.0355341	-0.165867	-0.135895	-0.0795269	-0.013633	-0.00666095	-0.168501		-0.0356214	-0.105795	-0.0526933	-0.113371	-0.11042	-0.127603	-0.145299	-0.155252	0.204499	0.00622554	-0.0275936	-0.118482	-0.0438358	-0.0746525	0.0486898
Effect_size	msp_0582					0.0214869				-0.0406781										-8.12665e-05							0.0205332	0.0212586					0.0303619		0.0202152		-0.0649492
Effect_size	msp_0583	0.0915631	0.241319	0.137375	0.00830329	0.275845	0.15088	0.255963	-0.0267291	0.12386	0.14032	1.8108e-05	0.179195	0.117998	-0.0609359	0.121425	0.04117	0.0732346	0.114231	-0.00986587	0.0955771	0.042705			0.478406	-0.00607659	-0.018575	0.0821811	-0.0347648	-0.0946627	-0.146102	0.037887	-0.00238348	-0.105708	0.0243164	0.070414	0.0415714	0.0929852	0.0881937
Effect_size	msp_0584	0.0795059	-0.0752583	-0.164741	0.0267148	0.10027	-0.00558079	-0.0476146	-0.00644517	-0.0916833	-0.0491166	0.00157598	-0.0836412	-0.236836	-0.0594411	0.0059501	0.0513409	-0.167021	0.15225	-0.0562869	0.134454	-0.0646567			0.0223269		0.100125	-0.0879435	-0.126477	-0.189841	-0.256343	0.0173378	-0.209984	-0.0714009	-0.0539995	0.0770685	-0.0975214	-0.0365744	0.0885449
Effect_size	msp_0585	0.132061	0.07145		0.071809	0.283644	0.135681	0.0241704	-0.0581124	0.129079	0.229577	0.0439482	0.174458	-0.286265	-0.143334	0.0766384		-0.147921	0.0623232	0.0120033	-0.192089	-0.195516	-0.0759671		-0.297531		0.0263854	-0.0290721	-0.0526816	-0.0603196	-0.297049	-0.282637	0.121439	-0.051572	0.0729996	0.0684902	-0.0620656	0.0633017	0.0557913
Effect_size	msp_0586	0.165764	-0.0595271	-0.0823262	-0.0498389	0.163526	-0.0516453	-0.190234	-0.140693	-0.0471566	0.0534114	-0.00183902	-0.0655804	-0.218629	-0.172914		0.089037	-0.295948	0.0724062	-0.0490986	-0.0773642	-0.227117			0	-0.0249033	0.0692516	-0.0394878	-0.0770104	0.00340745	-0.154832	-0.0878151	0.0302765	0.360625	-0.0642556		0.00070131	0.0784338	0.049683
Effect_size	msp_0587				-0.0712525		0.0618021					0.0178191	0.0785945				0.00408797			0.0306835			0.183925					-0.0405241	-0.0464827	0.0287918	0.0992172			0.134031	0.117009			0.0846799
Effect_size	msp_0588	0.029801	0.0802549	0.0956518	0.0897072	-0.00378525	0.179404	0.164531	0.204506	0.0534046	0.181244	-0.0149133	-0.0219144	0.367813	0.144034	-0.00330444	0.0401259	0.0411034		-0.0250236		0.0150517					0.145415	0.0291333		-0.00652658	-0.0673096		-0.101229	-0.00975158	0.0838081	0.0290666	0.0763533	0.0459471	-0.103162
Effect_size	msp_0589c																																				0.0217447
Effect_size	msp_0590						-0.0262612					0.00530549	0.0534355							0.00645245						-0.00419242	-0.0578907								0.00996568
Effect_size	msp_0591	0.022358	0.0415474	-0.348181	0.0162249	0.19034	-0.0221321	0.0124457	0.00995168	-0.0862977	-0.121923	0.0225168	0.153397	-0.1867	0.0307615	-0.0177054	0.0236383	-0.0154971	-0.091858	-0.144374	-0.212282	-0.0613839	-0.208124	-0.494881	-0.169946	-0.13148	-0.00744232	-0.109316	-0.187619	-0.189433	-0.035708	-0.0978822	0.0303251	0.0795097	-0.142058	-0.140464	0.00487592	-0.14952	-0.109679	-0.0708783
Effect_size	msp_0592	0.048457	-0.041401	-0.0270575	0.0475149	0.0185716	-0.0399624	0.0182933	-0.038807	-0.0494313	0.0499544	0.023123	0.0854195	-0.328856	0.0126753	-0.121706	0.0211682	-0.248616	0.118416	-0.0520842	0.0141462	-0.0520905	-0.12597		-0.10546	0.0402698	0.0682339	-0.0473017	0.0155084	-0.0993171	-0.220625	-0.0755456	-0.0243724	-0.0826582	-0.0201325	0.255585	0.00125937	-0.0883727	0.0619352
Effect_size	msp_0593				0.0593345		0.0611661										0.0529359			-0.00961039		-0.0387034						0.020516	0.0629213	0.0539078							-0.0975128
Effect_size	msp_0594	-0.189082	0.279184	0.0806137	0.0024631	-0.139065	-0.0195545	0.056304	-0.066672	0.0509723	-0.10217	-0.0516244	0.197745	0.159113	0.0963786	-0.0671783	-0.0038661	-0.172243		-0.0172723	-0.241796	-0.140235		0.0225075	-0.338871	-0.0179742	-0.101181	-0.0650027	-0.0315705	-0.0625529	-0.0714211	-0.208835	0.105641	-0.11529	-0.0186018	0.0951739	0.0337781	-0.00943985	-0.010573
Effect_size	msp_0595	0.0351892	0.138555	0.101819	0.00943456	-0.0483218	-0.021881	-0.131223	0.123094	0.141045	-0.0244064	0.0533586	0.0198009	-0.165702	-0.0782047	0.0805585	0.013073	-0.132711	-0.0901825	-0.0136255	-0.201359	-0.223183	-0.109132		-0.0743828	-0.034642	0.0513696	0.0535076	-0.106438	-0.117282	-0.0964729	-0.17217	0.164382	-0.0117844	-0.00420347		-0.089335	-0.0129401	-0.0334727
Effect_size	msp_0596	0.0154587	0.026129	0.0798538	-0.0334509	0.0210876	-0.0659355	0.0330129	-0.105178	-0.0427722	0.173258	0.0278638	-0.00889418	-0.275354	0.259172	-0.0652135	0.11175	-0.0923224	0.100928	-0.0204061	-0.0839729	-0.187294	-0.128837		-0.413191	0.00166606	0.0863237	0.0079637	0.0794081	-0.154161	-0.323362	-0.265364	0.0174262	-0.213569	-0.0589992	0.145901	-0.124609	0.0310591	0.0774872
Effect_size	msp_0597		0.103947	0.140698	-0.0124548	0.0819055	-0.0522615	-0.185016	-0.0531197	-0.131834	-0.00455355	-0.0397839	0.055178	-0.266933		-0.0569312	0.0105552	-0.0410226		-0.0725374		0.0594053				0.0038568	0.199616	-0.036522	-0.0316791	-0.131824				-0.0807152	-0.061907	0.180092	-0.0593495	-0.0664217	-0.0947813
Effect_size	msp_0598	-0.0326698			0.0984192		0.0121756		0.00750623	0.0333212	0.0429425	-0.0134568					0.0690957			-0.0176327									0.234883					-0.0111342	-0.00107637		0.0637084	0.221971	0.0452942
Effect_size	msp_0599	0.0775907			0.104291	0.018959				-0.0294735		0.00686613	0.00555117				0.107376			0.00826361														-0.0172447			0.0439476	0.209494
Effect_size	msp_0600c	0.0796325	-0.0679731		0.0873996		-0.0131562	-0.116889	0.103953	0.00231084	0.0466766	0.0362089		-0.0132921		0.0732314	-0.0123699			-0.00525701			-0.0150144			0.0282078	0.185749	-0.0571279	-0.0411429	0.0466401	0.0478705		0.0677809	0.174291	0.015151	0.180092		0.0589093
Effect_size	msp_0601c	0.0782157	-0.0708519		-0.0491362	0.157661	0.105564	-0.0525297		0.127482	0.0306367	-0.0539672	0.239379			1	0.0253472	0.00282049		0.0795754		-0.10354	0.0196727				0.0240717	0.00493605		-0.00828356				0.0240942	0.149633	0.072978		0.0252923
Effect_size	msp_0602c	-0.0307986	-0.0330315	-0.0274213	-0.058223	0.0279293	0.142839	-0.0900616	0.010197	0.0749362	0.0389982	0.109309	0.133925	-0.322377	-0.229921	0.0705895	-0.0207122	0.0568052	0.0264325	0.00320625		-0.0331138	0.068725				0.0154854	-0.0408096		0.259647	-0.0322569		-0.0740498	0.314809	1	0.342162	0.0310829	-0.0589402	-0.00934099
Effect_size	msp_0603c																						0.0924096												0.0300397
Effect_size	msp_0604	0.0661754	-0.0532238	-0.330114	0.0698345	-0.0454207	0.0150421	-0.118082	-0.138777	-0.00669306	0.144204	0.0204678	0.0632062	-0.531611	-0.34087	0.0551579	0.00548023	-0.0420143	-0.0985424	-0.0144943	-0.299725	0.0352675	-0.167744	-0.236682	-0.555443	-0.0708705	0.199976	-0.0349218	-0.168683	-0.166459	-0.290056	-0.231787	0.256	0.0448607	-0.0437969	0.246515	0.122166	-0.0606795	0.00210582	0.00729387
Effect_size	msp_0605	0.0558889	-0.093015		0.0336823	-0.146597	0.0317691	-0.143472	0.0537069	-0.0690347	0.0514204	-0.0415374	-0.0301276	-0.280826	-0.0630015	-0.0434512		-0.129797	0.102207	-0.002316		-0.0364655					0.0107193	0.0286741	-0.00680556	-0.0655268	-0.138171		-0.00382091	-0.0867777	-0.067719		-0.0715961	-0.0525566	0.089493
Effect_size	msp_0606																										0.118214								0.042569
Effect_size	msp_0607																0.160689																		0.0592304
Effect_size	msp_0608		0.0213072				0.0710473	0.159809	-0.0288013	0.0634349	0.112334	-0.0228173	0.0365798	-0.00617733	0.0481279			0.0762104				-0.149471							0.123299				0.091621	0.0129708			0.0149174		-0.00182537
Effect_size	msp_0609																																				-0.0670915
Effect_size	msp_0610	0.127904			0.0781084	0.507117	1	0.429794	0.578007	0.429137		0.2859	0.409965	0.114692	0.173013	0.133613	0.00548773		0.0145065	0.0573986	-0.166753		0.294515		0		-0.0109967			1	0.316327	-0.135236		0.0925837	0.253985				-0.0212864	0.327892
Effect_size	msp_0611			-0.0350297	0.0335192		0.1094	0.0989204	0.111655	0.0575651	-0.103935	0.0249539	-0.0283648				0.0535622	-0.0632559		0.0259099		-0.0668905					-0.0154622		-5.47852e-05	-0.0454001				-0.0428336	-0.0190677	0.094625	0.0801701	0.18013
Effect_size	msp_0612	0.0365977	0.0855759		0.112907	0.175445	0.0764106	0.0703541	0.006798	0.000887075		0.0888373	0.110562	-0.0409541	0.0278858	0.00958932		-0.0144537		-0.0501476	0.13929	0.0692727			0.0819811	0.00097442	0.051391	-0.0121635	0.00125099	-0.043723	-0.0579717	-0.0177391		-0.0975832	-0.0360773	0.0290666	0.0253495	0.0743639	0.000444809
Effect_size	msp_0613	0.270826	0.248805	-0.0330114	-0.0270208	0.327422	0.216485	0.225006	0.104225	0.0390331	0.132119	-0.0354711	-0.0121642	0.166935	0.107229	0.0513606	0.113189	0.0733955	0.0962867	-0.0388722	-0.0838325	-0.00557188			0.0907572	0.0279781	0.0393351	0.0836216			-0.222954	-0.171056	-0.0822708	-0.10338	-0.051551	0.173404	0.0334238	0.113567	0.25409
Effect_size	msp_0614						0.00340744			-0.0957888										-0.00500236										-0.0131694							0.0447768	0.225061	0.104943
Effect_size	msp_0615	0.00187913	-0.133489	0.0823262	0.00806745	0.0339692	-0.00516109	-0.0421241	-0.0717646	-0.0733434	0.0898225	0.0725523	0.114252	-0.193516	-0.0794284	0.0715132	-0.0241263	-0.189913	0.110436	-0.0462805	0	-0.063238			-0.136635	0.00479997	0.0503481	-0.0682943	-0.00531449	-0.127475	-0.177732	-0.0266102	0.112716	-0.0487552	-0.0126675		-0.0669695	-0.0598961	0.0320568
Effect_size	msp_0616				0.163761						-0.00455355	0.0856822	0.152172							0.0265842			0.0790308				0.00828065	0.0292004		1	0.305271			-0.0238776	-0.0228463		-0.0138891
Effect_size	msp_0617	0.0467057	-0.0948467	0.057087		0.126156	0.0708307	0.0155731	0.0361823	-0.0537256	0.14045	0.0421684	0.0294523	-0.129193	-0.131232	-0.00846205																	-0.0170177				0.0675477	0.0898924	0.0249921
Effect_size	msp_0618		0.12371		-0.0383033		-0.0174015	-0.0781655	0.00187656	-0.0596938		-0.0223072	0.0388661	-0.0132921	0.137539	-0.0376047	0.0400254			0.0412444							-0.0315435	-0.013541	-0.0168253	-0.0598102				-0.0296134	-0.0707082		0.0109586	-0.0426706	0.0369322
Effect_size	msp_0619	-0.146785	-0.0156129	-0.0378005	-0.00759889	-0.0929707	0.066482	0.0531816	0.0994175	0.143896	0.0909605	-0.0996866	0.0324446	-0.103298	-0.0270376	-0.0810492	0.0839813	-0.060505	-0.111291	0.0219591	-0.0183324	-0.127452	-0.100864	0	-0.0364509		0.105783	-0.0595349	-0.0529006	-0.117155	-0.238253	-0.0324253	-0.000932885	-0.128208	-0.0392935	0.034867	0.0326347	-0.0776539	0.357161
Effect_size	msp_0620				0.0847221	0.0279635			0.0177968	-0.0687009	-0.05252		-0.0303598			-0.0178105		-0.0632559																-0.0570914			-0.173636	0.0107216	0.0340214
Effect_size	msp_0621	0.0965427	-0.161358	-0.387271	-0.0961974	0.0587946	0.0197225	-0.225737	0.038518	0.10151	-0.0988076	-0.0237058	0.137466	-0.220766	-0.301783	0.187003	-0.037071	-0.155114	0.142123	-0.0921894	0.0559819	-0.201595	-0.128247	0	-0.0342349	-0.202535	0.155803	0.0477601	-1	0.0407876	-0.116419	0.0721957	0.331485	-0.0133144	0.0661843	-0.216392	-0.0157984	0.0121534	-0.0250866
Effect_size	msp_0622	0.00828287	0.0408886	-0.0919141	0.00998723	0.0186725	-0.0356309	-0.23993	0.00609723	-0.269316	-0.000548797	-0.0305642	-0.0811661	-0.380982	-0.112984	-0.108868	0.0226526	-0.265238	0.33534	-0.154234	0.0169552	-0.188908	-0.175166		-0.121503	0.0147424	0.206475	-0.0182986	0.0182391	-0.165753	-0.25956	-0.10415	-0.0349602	-0.212108	-0.0756562	-0.266952	0.031237	-0.156507	-0.0538385
Effect_size	msp_0623	-0.0638584	0.0936278	-0.00332428	0.0390107	0.0805633	-0.00826659	-0.119364	-0.0907534	0.027512	0.0877454	0.0343136	0.0443417	-0.4625	-0.24975	-0.0506335	-0.0316178	-0.0714795	0.17911	-0.100706	-0.161531	-0.0934751	-0.117876		-0.204553		0.0353583	-0.0323994	-0.0880904	-0.171821	-0.276701	-0.174259	0.150466	-0.069369	0.0197355	-0.252138	-0.0520715	-0.0885259	0.0508235	-0.0180528
Effect_size	msp_0624	0.0942002	0.0232205	-0.0459865	-0.0180507	0.155873	-0.00238399	-0.107341	0.0755394	-0.0367031	0.0248489	0.0239301	0.0689301	-0.327387	-0.16697	-0.103791	0.00915394	-0.212996	0.346107	-0.0191886	-0.0904162	-0.152092			-0.133962	-0.016233	0.161462	-0.0644488	0.0116831	-0.145621	-0.204499	-0.126918	0.0384762	-0.115955	-0.0714252	-0.0311968	-0.162573	-0.139472	0.13737
Effect_size	msp_0625	0.0199146			-0.0315868	0.0214869		0.0197814		0.00205383		0.0217704	0.0766522	0.0836701		-0.0138135	0.0429702			0.0118011			0.00470357				0.00737701	0.055642		-0.0257195	0.0966413			0.170474	0.0439317			0.202774
Effect_size	msp_0626	-0.0991695	0.0786378	0.137348	0.083939	-0.0968314	-0.0710718	0.0877309	0.109779	0.137742	0.115252	0.0457999		0.02022	0.0262141	0.0390105	-0.0276963		0.0145065	-0.0961672	-0.0843196	-0.0279025	-0.036544			-0.0400405	0.122283	-0.135241	0.0107831	-0.0130503	0.104909	-0.0620444	0.091621	0.130104	0.019654	0.131098	0.0627351	0.0643521
Effect_size	msp_0627	-0.0989668	-0.0739663	-0.170614	-0.00598367	0.0357431	0.00654572	-0.144409	-0.0111842	-0.0814073	-0.0582327	-0.0752608	0.0119609	-0.0419529	-0.0771574	0.000696215		-0.0434357		0.159927		-0.0483168	0.25742				0.00784571	0.137618	0.00771361	0.024518	0.257536		-0.202912	0.0150436	0.132921			0.0772014		0.0797287
Effect_size	msp_0628				0.0339603	0.125385	0.028316	-0.0791255		-0.0406781	0.0429425		0.0753928		-0.0577534			0.00882076		0.0524838								-0.0112118		0.0039866			0.0303619	0.0402915	-0.00335033		0.00330808		0.0272575
Effect_size	msp_0629	0.161714	-0.0924935		-0.0692518	0.140365	0.0824393	-0.0197677	0.0664918	-0.105254	0.0510334	-0.0627607	0.00695289	-0.123473	-0.0163728	0.0116973	0.101865	-0.185552			-0.106018	-0.122038				0.0406069	0.0584217		-0.0366105		-0.115864	-0.143835	-0.103726	-0.09994	0.000638603	-0.0459591	-0.0531625	-0.00593152	0.17525
Effect_size	msp_0630	-0.0750294	-0.0851838	-0.0826862	-0.00109814	-0.0460227	0.0290012	-0.129014	0.00326414	0.0469206	0.149893	-0.0541156	0.0768995	-0.409861	-0.0331053	-0.082837	0.00464074	-0.0689987	-0.0342977	-0.0630724	-0.283815	-0.0156133	-0.110086	-0.225075	-0.281347	-0.0528467	0.0636448	-0.085274	-0.0935278	-0.180291	-0.305744	-0.214991	0.0800481	-0.0842333	-0.0519943	-0.0066606	-0.0488744	-0.0752602	0.0463919
Effect_size	msp_0631	-0.00544645	0.0897526	0.0972351	-0.0236458	0.0800278	0.139972	0.205227	0.0903336	0.16503	-0.0158427	0.0472918	-0.0234833	0.243246	0.120979	-0.0432493		0.117635				0.177549					0.00310211	0.00380502			0.0107877		-0.0933081	-0.0181242	0.0179973	0.234299	-0.0224667	0.120788	0.286852
Effect_size	msp_0632	0.0779203	0.261229	-0.00260789	0.0116681	0.0714462		0.157274	0.0220637	0.0871938	0.0610235	0.055478	0.110214	0.0190658	-0.0116753	0.0691875		-0.0838585	0.238623	0.00896003	0.0717063	-0.120546			0.157084	0.040641	0.207729	0.0208274	0.0332178		-0.223714	-0.0492885	-0.220538	-0.085688	0.0169735	-0.0612755	0.138898	-0.0583401	0.085503
Effect_size	msp_0633	-0.0159624	0.208347	0.057087	0.0251355	0.252133	-0.0163296	0.130619	0.221434	0.130508	0.145801	0.114663		-0.00617733	0.187695	0.13965				-0.0497566		-0.0635873	-0.000774334			0.00193219	0.0959103		0.0317866	0.0823119	0.0362432		-0.0150156	0.131083	-0.00397371		0.0212668	0.0823572
Effect_size	msp_0634	-0.0707926	0.0825698	0.0607047	0.0421304	0.172442	0.00331008	0.0456285	-0.007931	0.0310301	0.0121735	0.0314836	0.0683876	-0.0321113	-0.127844	0.0769123		-0.0488633	-0.169168			-0.0275964	0.0588385				0.0243349	-0.00417415	0.0037765	-0.0130956	-0.0454823		0.0398258	-0.0572752	-0.0117708	0.167335	0.221238	0.132382	-0.0111202
Effect_size	msp_0635		-0.18362		0.121718		-0.0644543	-0.116528		0.150309		0.107453	0.214538	-0.190133	-0.0506413	-0.0688116	-0.0117232	0.160532		0.0154845	-0.0245728	0.0655728	-0.079238			-0.0433223	0.00251117	-0.0634875	0.0359916	-0.0671807		-0.140339		-0.0929758	-0.0911041	0.244712	-0.0380468	-0.0744321	0.104119
Effect_size	msp_0636	0.124351	0.0717351	-0.0379489	-0.0244796			-0.0829807	0.0142457	-0.00831216	-0.0539789	-0.0644907	0.164672	-0.153965	0.0729549		0.0115958	-0.0410226		-0.0636688			-0.0234406					0.0851813	0.0224893				0.0240943		-0.0714566		-0.054157	0.0101057	-0.0841001
Effect_size	msp_0637		0.0213072		-0.00657691	0.0214869	0.0154213	0.0979783	0	0.0338765		-0.0418976		-0.00411822	0.170683	0.0119214	0.0682858	0.0699797		0.0553789		0.00700965	-0.0634695			-0.0532003	-0.0200837	-0.0408161	0.00742765	-0.0926935	0.00289594			-0.0242739	-0.0248962		0.00507454	0.003673
Effect_size	msp_0638	-0.0111737	-0.0279748	-0.040868	0.0344013	0.0739898	0.0391058	0.126708	0.0552026	0.0916671	-0.0133762	0.00562224		0.0646477	-0.0560033	0.0980008		0.121836	0.179741	0.0081728	-0.229137	0.0678736					0.13227				-0.0937304	-0.273508	-0.0659927	-0.029324	0.00359215	0.244712	0.0084962		-0.0390227
Effect_size	msp_0639	-0.0506175	0.160256	-0.126792	0.0400412	0.00279128	-0.0963863	-0.0765036	-0.110828	-0.277034	0.0196853	0.0361189	0.0357088	-0.288193	0.0402119	-0.200589	0.014471	-0.191684	0.133712	-0.112802	0.322065	-0.0539022		-0.130677	0.235969	0.0372315	0.0202947	0.100124	0.058332	-0.045045	-0.159464	0.0845663	-0.0139228	-0.234183	-0.0784616	0.0872377	-0.0531035	-0.0865027	-0.11482
Effect_size	msp_0640		0.090647	0.0744381			0.0326127	0.0773314	0.0180957	0.0216855	0.0277189	-0.0637482		0.0659126	0.118168		0.0521603	0.0385739		-0.00950507		-0.0187686					-0.00843287	0.0212946					-0.0738533	0.00168763	0.0012427	0.0523199	0.0137641	-0.00280055	0.167008
Effect_size	msp_0641	-0.0692813	-0.00859871	-0.121409	0.0518672	0.0753728		0.016424	0.028834	-0.0548212	0.0740755	0.0479868	0.0441002	0.158927	-0.000454453	0.0656069		-0.0561928	0.200887	0.0189085		-0.10777				0.0691771	0.0137686	0.0821883		0.006319			-0.0929089	0.0510292			-0.0270623	0.200597	-0.0632689
Effect_size	msp_0642	-0.00136161	-0.054106	-0.0683078	0.125047			0.0701564		0.169838	-0.0876142	0.0420388	0.0590951	-0.0162038	-0.0104524			-0.120571		-0.00690308		-0.178275									-0.027145		0.0161782	-0.130156		0.172812	-0.0525476	-0.000325566	-0.0418101
Effect_size	msp_0643	0.0313504	-0.105918	0.121691	-0.00326125	-0.00414896	-0.083077	-0.200539	-0.146063	-0.118691	0.0448185	-0.0106493	0.0145994		-0.299085	-0.0712809	-0.0336667	-0.0283291	0	-0.0465746	0.0393967	0.0917515				0.0122486	0.10353	-0.0362319	0.0528978	-0.0720586		0.031073	0.11786	-0.0326286	-0.0872236	0.131098	-0.0662945		-0.0793701
Effect_size	msp_0644		-0.0393265		0.0339603	-0.0072952	-0.038819	-0.0209841		0.0563903	-0.00455355	0.00498875	0.013681		-0.128498		0.0548506	-0.0935465		-0.0509628		-0.102201				0.0013847	0.0709677	-0.0494907	-0.0174723	-0.0586869				0.0316583	-0.0474912		-0.00896342	-0.0176221	0.0653795
Effect_size	msp_0645	0.0751479	-0.081357	0	0.0210591	0.20463	-0.0175027	-0.196629	-0.0644447	-0.154577	0.0277189	-0.0459363	0.0720865		-0.205206		0.0139015	-0.0935465	0.0370055	0.0726784	-0.109098	0.0150145			-0.163962	0.0382075	0.00474584	0.00615415		-0.0579239		-0.196732	0.0416928		-0.0449122		-0.0799105		0.0506801
Effect_size	msp_0646		0.131367	0.140698				-0.0326602	0.101025	0.0444621	0.0448096		0.0534355				0.0355501			-0.0486685								-0.024409		0.0426357			-0.0170177		0.0171887		0.0217447	0.0584544	0.0712461
Effect_size	msp_0647	0.0253381	0.0653443	-0.0376103	-0.000697721	0.26738	0.258619	0.179861	0.17831	0.176522	0.167204	0.00873199	0.160117	0.0782483	0.165627	0.168484	0.0561952	0.0537822		0.0215282	-0.339672	-0.0148761			-0.439835	0.00417016	0.0395424	0.0240655	0.0231016	-0.0571791	-0.164337	-0.436017	-0.215351	0.0464449	0.0904148	0.0583005	0.0600935	0.205791	0.35354
Effect_size	msp_0648	0.188928	-0.086449	-0.070935	0.0874237	0.306823	-0.0761896	-0.0208167	-0.0384411	-0.0555924	-0.0111021	0.131176	0.107363	-0.225539	-0.121873	-0.057895	-0.0155365	0.0578148		-0.0763379	0.101039	0.159155	-0.00997932			-0.0419226	-0.0209942	-0.0424389	-0.0592602	-0.0634467		0.031073	0.11786	0.0165745	0.0271728	0.0778023	-0.0712935	-0.0349252	-0.161798	0.0267865
Effect_size	msp_0649						-0.0595129					-0.0421377								0.0569827			0.0657267			-0.0288801	-0.0266486	-0.0106957	-0.0766677	-0.0444492				0.051755	0.00627369
Effect_size	msp_0650	0.0357857	0.203602	-0.0218139	0.0718162	-0.0613423	-0.123886	-0.0360618	0.0160412	-0.16319	0.0166377	0.0254682	-0.0463661	-0.452426	-0.311478	-0.0258053	0.0168889	-0.147624	-0.118416	-0.198399	0.0499875	-0.0157286	-0.222294	-0.116311	-0.111574	0.0451919	0.0597494	-0.0131533	0.0143702	-0.146091	-0.168706	-0.147969	0.0142058	-0.0743068	-0.173639	-0.0613045	-0.0557841	-0.150758	0.0050034	-0.0422191
Effect_size	msp_0651				-0.0165508							0.00916542					0.0945285			0.0269814						0.0783236		0.23084	0.0301468						-0.00472956			0.118036
Effect_size	msp_0652	0.0964107	0.0108007	0.152917	-0.0636662	-0.0461414	0.0115888	-0.0361135	-0.105635	0.0856733	0.0876254	-0.00558446	0.0830464	-0.393325	-0.233966	-0.0468832	0.023553	-0.177536	0.0962867	-0.0401254	-0.0300704	-0.157823			-0.133962	0.0167645	0.0929926	-0.0493597	-0.029863	-0.102119	-0.257199	-0.158394	0.0245614	-0.14556	-0.0611634	-0.135937	-0.152129	-0.0620561	0.0617708
Effect_size	msp_0653		0.126638	0		0.0214869		-0.0131281			-0.0105559	-0.0187843	0.0273883			0	0.105168			-0.070903		-0.0483168					0.0453359	-0.00551643	-0.0337893	-0.0373227					-0.0289197		-0.0147183	0.0730389
Effect_size	msp_0654	0.0317869	0.223181	-0.153791	0.0538297	0.19694	0.0271905	0.0536103	-0.00107376	-0.0618282	-0.0340863	-0.029506	-0.0991588	-0.138147	0.0840996	-0.0448888	0.0464369	-0.174814	0.156425	-0.0996812	0.16619	0.0241764	-0.18254		0.298376	0.0136489	0.0409185	-0.0963432	-0.0430685	-0.263435	-0.203309	0.0436184	0.0768915	-0.1005	-0.0395965	-0.104719	0.0718707	-0.0656031	0.174451
Effect_size	msp_0655	-0.0779769	-0.112856	-0.367456	-0.0311499	-0.166456	0.0804038	-0.155329	0.0122697	-0.0141954	0.0376152	0.0491091	0.211282	-0.532236	-0.435209	0.0660046	0.0650182	0.249889	0.263399	-0.0381096	0.0497968	0.119434	-0.19376	-0.061265	-0.170138	-0.117974	0.214061	0.00606725	-0.191016	-0.206424	-0.43907	0.00918658	-0.0177618	0.0771469	-0.054302	0.110419	0.072286	-0.131794	-0.204265
Effect_size	msp_0656		-0.0112445		0.0344013		-0.00383555	-0.0663083		0.108963	0.0320956	0.0419093			-0.181751		0.0236577		-0.0661338	0.030459						1			0.0824403		0.0128377		0.115495	-0.0418001	-0.0550458		0.105395		0.0292044
Effect_size	msp_0657	0.164413	0.0850902		-0.0198484	0.202952	0.134544	0.162768	0.208072	0.0505499	0.0752547	-0.0523334	0.0168958	0.181479	0.231502	0.0606935		0.192367		-0.0340708		0.148513					0.0643248	-0.0112118					-0.114871	-0.0728812			-0.0643284	0.0292731	-0.0103685
Effect_size	msp_0658																																				-0.0147183
Effect_size	msp_0659		-0.0303061		-0.00489188	0.277635		-0.0349522		0.00369689	0.0429425	-0.0108895	0.140187	-0.00660553						0.040671							0.0137686		0.0229267		0.0983352		0.0967466	0.098447	0.0123482		-0.0103968
Effect_size	msp_0660	0.113453	0.0460204		0.00308335	0.0794366		0.0850106	0.0349762	-0.0228023	0.0648746	-0.0520346	0.0345464	0.0247133	0.060741			-0.0967723	0			-0.0469594											-0.0235449	-0.0311418		0.0529055	-0.150167		0.080515
Effect_size	msp_0662	0.111989		0.295233	0.0032936		0.0768017	-0.0122529	0.0576338	0.0644154	0.119786	0.0104491		0.0213433	-0.00563913	0.0640489	-0.0136794	0.0225295		0.0160479		-0.0911162	-0.0178683				-0.0737502	-0.0727322		-0.117073			0.115495	0.020604	0.0968191		0.0439476	-0.0253957
Effect_size	msp_0663	0.0782157	0.0460204		-0.101215	0.122663	0.148396	0.11081	0.154094	-0.0512729	0.139113	-0.0400417	0.0253733	0.194614	-0.00062657	0.0356872		-0.131699			-0.431088	-0.171312			-0.315908		0.0243349	0.0250318	0.00348223		-0.102555	-0.455847	-0.0170177	-0.0833436	-0.0315673	-0.0360088	0.02823	0.0401525	0.0991406
Effect_size	msp_0664						-0.0113022					0.00357698					-0.0201607			-0.0179102						0.0423291	0.0791588	0.0168508	0.0198853	-0.0507206					-0.0222064		-0.00993299
Effect_size	msp_0665	0.0217822	0.0540174	-0.111346	-0.0139341	0.00717953	0.0655168	-0.0171035	-0.0926167	-0.0302558	-0.00593226	-0.104845	-0.134558	-0.182698	-0.0894493	-0.0685498	-0.00586362	-0.0870315	0.182999	-0.04491	-0.329404	-0.0980757			-0.502084	-0.0174076	-0.0148703	-0.0399703	-0.0426269		-0.271233	-0.404793	-0.0736998	-0.157685	-0.0644469	-0.0123579	-0.0335258	-0.0116737	0.263718
Effect_size	msp_0666	0.073427	0.152135	-0.0379489				0.0544213	-0.00946352	0.0871515	0.10651	-0.0285657	0.0838789	-0.0152991	0.0708962			-0.0202355	0.114231	-0.000162533		-0.203009					0.058164	0.0212586	0.0302851	0.0127958			0.0292207	-0.0477065	0.041265		-0.0723658		0.0129559
Effect_size	msp_0667	0.073427			-0.0288894	-0.0311033	-0.00293648		-0.0111842	-0.118713		0.00568435							-0.169168	-0.0139209							-0.0120797	-0.0109782	0.158021	0.00424589				0.0284724	-0.0388065		-0.0151329		-0.0445974
Effect_size	msp_0668		-0.0279748			-0.0311033											0.00143497	0.011761		-0.0396725		0.109139					0.0264946	-0.0647915	0.000406109	-0.0620646					-0.052386		-0.130599		-0.020467
Effect_size	msp_0669	0.109061			-0.0252956	0.0761943	0.0990353		-0.0181204	-0.0686034		-0.083626	-0.0112502			-0.0284761		-0.0701881		-0.00682885		-0.122411						0.081903			-0.0274976				-0.0114406		0.0388076	0.0309571	0.112537
Effect_size	msp_0670	0	0.0334793	0.0789516	-0.0247804	0.145027	0.0732795	0.143158	0.001133	-0.0215568	-0.0278318	-0.0389043	0.0342942	0.221399	0.0978661	0.0618258		0.0426556	0.0158595			-0.119195					0.0206519	0.0924845		0.0131079	0.0341806		0.0118286	-0.0311525			0.0497215	-0.0132094	0.00667214
Effect_size	msp_0671	-0.0743483	0.135551	-0.112145	-0.000209953	0.0378359	0.0125596	0.0728212	0.0891949	0.16049	0.0871698	0.0310616	0.0449369	-0.00662971	-0.171724	0.0221518	0.00205011	-0.0768378	0.174431	-0.0345627	0.0902111	-0.171226	-0.068308		0.0669808		0.12219	0.011789	-0.0894592	0.0557836	-0.241966	0.0224825	0.116922	-0.0433384	0.0439337	-0.110732	0.0662376	-0.0688178	0.0555188
Effect_size	msp_0672		0.0460204	-0.0321106				-0.0148786	0.0261104	0.0306843	-0.0120386			-0.0474586	0.117972	0.102323		-0.0226633		0.0112939	-0.0843196	-0.0891136				0.0606381	0.0712111					-0.0620444	0.00491259				-0.026581	0.17468	0.0714613
Effect_size	msp_0673		-0.0469244	0.0861147		0.0819055		-0.0418674	0.0206443	0.111825	-0.00730792		0.00697454	-0.138033	-0.14246				0.102207	0.0405423	0.0773642	0.0540048			-0.0326077							-0.135236	-0.0235449		-0.0116431		-0.0838057		-0.0195849
Effect_size	msp_0674	-0.0772617	0.188501	0.133998		-0.0102373	-0.064714	-0.0240929		-0.0363755	-0.00683032	-0.0133277	0.112536	-0.13183	-0.0783212	0.0433679	0.0401298	0.0265408		-0.0126937		-0.0276633	-0.0587743			-0.0308642	-0.033137	-0.0535163	-0.0142268	-0.0961466				-0.0930684	0.0714438		-0.106723	0.0245043	-0.0730146
Effect_size	msp_0675	0.0775907	0.0893748	0.0652013	0.0335566		0.0194668	0.00205699	0.193313	0.0764023	-0.0889518	0.0448611		0.0316391	0.0720555		-0.00709116	-0.0458488		0.0100374			-0.0221323			-0.0157185	-0.0298171	0.0422179	0.0529534	-0.0216182			0.144168	-0.0236794	0.0437981		0.0561895	0.00282538
Effect_size	msp_0676	-0.0345494	-0.012316	-0.0337248		-0.0781388	-0.0195836	-0.132392	0.00351354	-0.0917187	-0.0841425	-0.0469356	-0.0299674	-0.236401	-0.151162	-0.0449725	0.0701447	-0.228047	0.179741	0.0349152	-0.0909154	-0.209793			-0.163962	-0.0093947	0.076823	-0.00215222	-0.0369247	-0.0766314		-0.189378	-0.0674532	-0.0862919	-0.0537025		-0.14226		-0.0095175
Effect_size	msp_0677c				0.0201399	0.169411	0.186416					0.129343	0.158755			0.134833				0.0951547			0.0379381							0.151886	0.068526			0.19112	0.109334			0.0584544		0.250488
Effect_size	msp_0678	0.0174253	0.0895381			0.0819055		0.0743261		0.117196			0.0947616		-0.0457945	0.0196706			0.0145065	0.0348928														-0.0172447			0.0217447
Effect_size	msp_0679	0.000810489	-0.048654	-0.0113643	0.0452307	0.0384956	0.0123744	-0.131051	-0.052668	-0.106274	-0.0135031	-0.0158179	-0.0667509	-0.322386	-0.152332	-0.0993765	0.0332414	-0.20382	0.0724062	-0.0227864	-0.051987	-0.222691			-0.159469	-0.0331757	0.117541	-0.0676773	-0.0305302	-0.124353	-0.272121	-0.267369	-0.152651	-0.195035	-0.0884392	-0.232662	-0.0656697	-0.0274045	0.0487897
Effect_size	msp_0680c																																				-0.074628
Effect_size	msp_0681		-0.0303061				0.0832484	0							0.039643					-0.0340708		0.00700965					-0.0117719			0.026782				0.0287941	-0.00383846	0.244712	0.0248391
Effect_size	msp_0682	0.113453	-0.0256436			0.242337		0.0718813	0.064803	0.0277835	0.0429425		-0.0139859		0.0695493	-0.000971862	0.107376	-0.0704329		0.0368137		0.0150517							0.0394783				-0.0170177		0.0300401	0.0406932	-0.145963		0.0790992
Effect_size	msp_0683	-0.0989668	-0.0755234			-0.0438613		-0.111724	0.0632029	-0.046992			-0.00767657	-0.161921	-0.111264		0.222217	-0.190884		0.011487	-0.236904	-0.166852									-0.0700891	-0.228163		-0.0303936			0.00684694	-0.00333398	0.0220251
Effect_size	msp_0684
Effect_size	msp_0685	0.114922	-0.161517	-0.164652	0.0264584	0.208295	0.15669	-0.207881	0.116951	-0.00371178	-0.0881101	-0.070337	-0.0316776	-0.334677	-0.266173	-0.0652491	0.0760551	-0.220914		-0.0160878	-0.189561	-0.219717			-0.163962	-0.00854054	0.123111	-0.0458386	-0.0337652	-0.0207991		-0.0705482	0.00556642	-0.111967	0.0527197	0.245102	-0.0753265	-0.0736885	0.0943819
Effect_size	msp_0686	-0.028586	-0.00150835			0.121176		-0.22374	0.0632029	-0.0166606		0.00357698	0.0137816	-0.245905	-0.126005	-0.0308469	0.0301124	-0.0530816	0	0.0810394	-0.0843196	0.0406652			0		-0.00769586		0.0536067	-0.0382054	-0.105925	-0.0911695		-0.0721016	0.00891024	0.20056	-0.0609981	0.0246777	0.0754484
Effect_size	msp_0687				-0.0214625			0.077137		0.104631		0.00342818																		0.0748219							0.0105871		0.073621
Effect_size	msp_0688	-0.029431	0.119318			-0.122663		0.0722025	0.243024	0.0231866	-0.0089319		-0.00148761	-0.0108753	-0.00313285	0.0193855		-0.110685	0.102207		0	-0.149604										-0.140339	-0.0235449	-0.173589			-0.105217	-0.0406462	0.0756532
Effect_size	msp_0689	0.0199146		0.140698		0.128993				-0.0231698	0.144463		0.036698			-0.0372972		-0.00967723						0.0578799								-0.341917	-0.0150156	-0.0799988		0.276976		0.127822	-0.0258477
Effect_size	msp_0690	-0.00957743		0.0530094		0.0349404				0.0870432	0.0429425	0.0483037	0.200599			0.0572265				-0.012514							0.00763289	0.00833377			0.0223018		0.190902	-0.0381144	0.0426224		0.0212668	0.0685229
Effect_size	msp_0691	-0.141519			0.0168297	-0.185911	0.00779436			0.0788669		0.0235299								0.211395			0.176036				-0.00115286	0.152791	0.00764658		0.0497478				1				0.073621
Effect_size	msp_0692	0.00408484	-0.0497812		0.00411113	0.0526399	-0.0102174	-0.0793501	0.00541307	-0.0328134		0.00758704	0.130303		-0.167871	-0.0322893	0.0204668	-0.130916	0.264086	-0.0256881	-0.132784	0.0163978			-0.136635	-0.0244776	0.0131719	-0.0823987	0.036765	-0.119279	-0.0847107	-0.0978855		-0.10192	-0.0409854	-0.0394623	-0.109616		-0.0101166
Effect_size	msp_0693	0.0199146	-0.103213		0.0273205		-0.0235002	-0.0615477	-0.0115712	-0.119515	0.0320956	0.058799	-0.0309289	0.108962	0.0634071	-0.0459233	0.0494492	-0.271915	-0.0901825	-0.0277202		-0.15384	-0.168527			-0.104396	0.0943923	-0.0573474	-0.128474	-0.196258	-0.0221607		-0.070571	0.035506	-0.064358	-0.00232131	-0.0409474	-0.0204681	0.0661418
Effect_size	msp_0694								0.00187656	-0.0569958			0.144722																						-0.0271577		-0.0147183	0.020176	-0.0243273
Effect_size	msp_0695		0.0426734					-0.116889				0.0295982		-0.0132921	-0.00689227						-0.0427205								0.0520653			-0.140339		-0.0166099			-0.081836	0.141498
Effect_size	msp_0696		0.0300457		0.073418	0.0778154		-0.00755871		0.182605	0.116711	-0.0478002	0.0791238	-0.0691946	0.0412392	0.166293		0.0157546		0.0707947							-0.000975494		0.00785325	-0.00901589	0.00334147		0.119206	0.0987687	-0.006785		0.00530007		0.0292044
Effect_size	msp_0697	-0.0137513	-0.181431	-0.20418	-0.0871438	0.0725374	-0.076624	-0.121564	-0.0321303	0.0718729	0.0692536	-0.0490532	0.00907412	-0.372275	-0.313539	0.092385	-0.0334412	-0.229249	0.17255	-0.0979273	0.141965	-0.242191	-0.0878997		0	-0.068562	0.227093	0.0150744	-0.109317	-0.119155	-0.25086	0.0609797	0.272814	0.0211925	-0.122005		-0.0844953	-0.0501168	-0.0918659
Effect_size	msp_0698	0.0481067	0.133989		-0.103808	0.00681615	0.111655	-0.061916	-0.0692888	0.100882	-0.0405019	0.0196444	0.181064	-0.151614	-0.111253	-0.0745746	0.00425329	-0.147338	0.182518	-0.0427333	0.0818712	-0.106479	-0.0447803		0.0669808	-0.0332419	-0.0472378	0.00278369		-0.0793055	-0.154903	-0.0634971	0.00106789	-0.072867	0.0976827		-0.0359599		-0.0302214
Effect_size	msp_0699	-0.151317	0.12927		-0.00605335	-0.118835	0.130031	-0.00491804	-0.117611	0.0453529	0.114392	-0.0687164	-0.000145591	-0.0923242	-0.0772867	0.070743	0.0620836	0.00826666			-0.143828	-0.206743			-0.159469	0.0491174	0.128127				-0.2047	-0.322456	-0.171863	-0.106643	-0.0272129	0.011141	0.0405295	0.0533001	0.269679
Effect_size	msp_0700		0.0241481		0.0344013		0.068073	0.0515688			-0.0597461	0.0690701								0.0652002			0.13267					-0.00477045		-0.0131694			-0.0263989		0.152939
Effect_size	msp_0701	-0.0326698		0.0802764	0.0487005	-0.0269562				0.0764023	0.0306367	-0.0514675				0.188642		0.00882076				0.107137												0.0291159			-0.033577	0.120655	0.147969
Effect_size	msp_0702												0.0243592			0.0376504
Effect_size	msp_0703	0.0776119	-0.0329913	0.137348		0.120227		-0.193248		-0.0688637	0.0429425	-0.0378511	0.0312494	-0.194591	-0.0572884	-0.0372972	0.0597765	0.185435	0.102207		-0.0830949	0.063272			-0.163962	0.00397605	0.0263287	-0.00826505	-0.0136116	-0.0563962	-0.0545193	-0.273508	0.0303619	-0.0806342	-0.067491		-0.147479		0.00425919
Effect_size	msp_0704								0.155207	0.056267	-0.0597461							-0.0840247																0.0521486			-0.132481	0.149689	0.0439006
Effect_size	msp_0705	0.191772	-0.0948467	-0.0656806	-0.0667541	0.162926	-0.122212	-0.0240929	-0.0647267	-0.256113	0.0737265	-0.0320704	-0.0546645	0.0199776	0.149798	-0.0392283	0.0389222	-0.114505	0.0720234	-0.144923	0.0601722	0.0319097	-0.210445			-0.0680219	4.86042e-05	0.0190005	-0.120785	-0.166835	-0.0719062	-0.0394003	0.0161782	-0.0704579	-0.116203	0.0348799	-0.117893	-0.0231647	0.0784893
Effect_size	msp_0706	0.0174253	0.134932	0.0530094	-0.0162604		0.0285188	0.0171439	0.0552324	0.00287536	-0.00683032	0.044284	0.102724	-0.00617733	0.0463778	0.0624897				0.0360627	-0.0504878		-0.0206172		-0.0326077		-0.0281562	0.00975299	-0.0146026	-0.00846457	0.0655367	0.0457257	0.236782	0.0315577	0.110104		0.158756	0.131668	0.0311514
Effect_size	msp_0707	-0.00349867	0.16931	-0.0852322	-0.0447727	0.185729	0.0805799	0.182329	0.253663	0.146793	0.0881318	-0.0563817	0.0994592	0.145168	-0.000970214	0.117259	0.0831403	-0.0864256	0.182999	0.00355503	-0.207713	-0.0225175		-0.146385	-0.099668		-0.0254364	0.00889408	-0.0476389	-0.0688903	-0.180158	-0.129049	-0.0804822	-0.0209949	-0.0315336	-0.145173	0.0835921	0.126144	0.282425
Effect_size	msp_0708									0.00115542							0.06294			-0.022279							-0.00115286								-0.0269921		-0.0190419		0.147969
Effect_size	msp_0709	0.185564	0.0397014	0.0469669	-0.0083155	0.189855	-0.104019	-0.169293	-0.0805628	0.00518777	-0.0169972	-0.0150506	-0.0564277	-0.249715	-0.214398	-0.0845643	0.0379075	0.0207004	-0.148022	-0.0606371		-0.0131262	-0.112165			-0.0260702	-0.00884074	-0.0575554	-0.0984464	-0.0463902	-0.153017		-0.0672613		-0.0143823		-0.130634	0.00816614	0.10542
Effect_size	msp_0710		0.21002					0.113777		0.110725	0.0429425				0.049878					0.0497179										0.0328654			0.091621	0.073222			0.0217447
Effect_size	msp_0711c				0.00376854						-0.00455355	-0.0516092																						0.0521486
Effect_size	msp_0712	-0.161574	-0.00198432		0.0368667	0.207876	0.0455155	0.0653562		0.178121	0.063537	0.047539	0.196806	-0.140857	-0.00227226	0.272481	-0.0441525	0.104647		0.0187691		0.0530214	0.048429			-0.0605783	0.110879	-0.0110013	-0.113954	1	0.174403		0.166328	0.175498	1	0.31429	0.113728	0.0113124	0.0452942	0.302167
Effect_size	msp_0713	-0.033037	0.122841	-0.149988	0.0335908	0.160195	0.152991	0.178257	-0.0131383	0.185331	-0.0338118	0.013898	0.282682	0.382358	0.392527	0.236595	-0.0223568	0.236244	-0.0152225	0.134205	-0.0517808	0.202118	0.0593879	0.594304	0	-0.0954431	0.0167281	-0.0423669	-0.189496	-0.0077864	0.349223	0.0970997	-0.13891	0.217886	0.163512	0.066846	0.0655104	0.259001	0.0761391	0.0781565
Effect_size	msp_0714c		0.0850902
Effect_size	msp_0715c			0.140698	0.121365		0.0865878		0.103953	0.0454081		0.128867	0.0791238							0.00929295			0.0433894			-0.00166591	-0.0194644	0.0294089	-0.00197078	1	0.0692473			0.0521486	0.00576057		-0.0465958			0.309944
Effect_size	msp_0716	-0.000497468	-0.110859	0.0275128	-0.0637975	0.00353804	-0.02164	-0.15647	-0.0642399	-0.0549285	0.126742	0.0311914	-0.030853	-0.382824	-0.249596	-0.0342032	0.0211497	-0.331955		-0.0134941	-0.0366552	-0.285199			0.0209445	0.0451239	0.123834	-0.0214802	0.0654867	-0.0975963		-0.19431	0.0199934	-0.112177	-0.0563421		-0.0934926	-0.0193767	0.12692
Effect_size	msp_0717		-0.00820789		0.0598739		-0.00622911	-0.077137		-0.0287367		0.00357698		-0.0514135			0.0081758	-0.0434357		-0.00499405		-0.0506176				0.0297551	0.0547717	-0.0380697	-0.00741746	-0.0364426					-0.0174638		-0.0531008	0.0938114	0
Effect_size	msp_0718																0.238601			0.0608879
Effect_size	msp_0719	0.0811822	0.181391	-0.0965326	-0.0108323	0.0492082	0.0868886	-0.0839268	0.202995	-0.102505	0.0553032	-0.0748526	-0.0988515	-0.0639394	-0.00127307	-0.0581222	0.102992	-0.0379318		0.00568625		0.0197788				0.0431003	0.0915194		-0.0346944	-0.037189			-0.13919	-0.120219	0.00395743	0.257666	-0.0647449	0.0430725	0.0494018
Effect_size	msp_0720					0.0214869							0.0530028					-0.066722				-0.0718454													0.00367473		-0.132166
Effect_size	msp_0721		0.0241481
Effect_size	msp_0722	-0.0388018	0.0360178	-0.422343	0.0249588	0.00265046	0.0536792	-0.113377	-0.196818	0.0240472	-0.0374359	0.116254	0.117215	-0.521188	-0.407197	0.14244	0.0139326	0.0147706	0.121397	-0.0692898	-0.0719636	-0.0338413	-0.252738	-0.75308	-0.170138	-0.162295	0.191322	0.0539538	-0.287114	-0.150854	-0.381677	-0.0860996	0.0262211	0.00183036	0.040838	0.146304	-0.0600941	-0.189021	-0.127615	-0.0717045
Effect_size	msp_0723	0.102862	0.0800671	0.0515095	-0.0471771	0.0562604	-0.0430867	-0.118813	-0.115853	-0.13974	0.0870461	-0.0673537	0.149502	-0.351491	-0.0475397	-0.038045	0.0164946	-0.101331	0.0242495	-0.0271462	0.0212708	-0.208446			-0.249268	0.0529106	0.0746172	-0.0225676	-0.0143808	-0.101368	-0.281316	-0.174259	0.0111323	-0.104469	-0.0650895	0.0740698	-0.0981683	-0.100262	0.0844824
Effect_size	msp_0724	0.0174253	0.120782					-0.0461628	-0.0304014	-0.0738619		-0.0200975	0.137734	-0.0968812	0.110074	0.0498819	0.0580228	0.00882076		0.0140601	0	0.0678736				0.0456639	0.0767042	-0.00468527						0.0129708	-0.0118208		-0.0670339		0.00182537
Effect_size	msp_0725		0.0359796	0.0211637	0.0319998	-0.0803877	0.150006	0.103597	0.103953	0.213175	0.0618646	-0.0761867	-0.000198782	0.0453698	-0.0498955	0.169092	0.0749077	0.106163			-0.0969764						0.00803462		0.0169681		-0.10854	-0.282403	-0.138098	-0.0789249	-0.0175064		-0.0561916	0.00975203	0.305214
Effect_size	msp_0726			0.057087																													0.0287207		0.0300397		-0.0423749
Effect_size	msp_0727	0.0174253				0.018959		-0.0113777		0.104631				-0.0968812	-0.0936012							-0.103738														0.0591297	-0.0890031
Effect_size	msp_0728	0.0796325	0.00627707		-0.0229234	0.202952	0.139996	-0.0360073	-0.0940303	-0.214925	0.163097	-0.0323789	-0.0537682	-0.125689	0.0361724	-0.0627034		-0.172723		0.0190735		-0.0956294						0.120466					-0.116298	-0.136205			-0.127182	-0.00265025	0.19195
Effect_size	msp_0729	0	0.132378	0.20434	0.0335192	0.102202	-0.0329634	-0.0784961	-0.0931013	-0.134745		-0.0199148	-0.0415321		-0.157269	-0.0513086	0.0393543	-0.0597714	0.0267099	-0.046101		-0.0816629				0.0243696	0.150198	-0.0126118	0.0191265	-0.0725589			-0.0150156		-0.0298228		-0.0614984		-0.0273498
Effect_size	msp_0730		0.0155718					0.000369928	0.0632029	0.0287938			-0.0190577		-0.00601937			0.0138643				-0.0351031					0.0294412				-0.0706082				0.00359215		-0.144138		-0.0404164
Effect_size	msp_0732	0.143023	0.150867		-0.0195534	0.145897	0.198239	0.221459	0.225538	0.171076	0.0477957	0.00833404	-0.065033	0.0556655	0.190982	-0.0541908	0.106404	0.0557375		-0.0152715		-0.115948					-0.00462871	-0.0430009	-0.0329058		-0.141738		-0.252343	-0.125124	-0.0502814	-0.0192221	-0.0544439	0.123232	0.214961
Effect_size	msp_0733	0.144322	-0.0594137	0.0484852	0.0311156	0.129344	-0.115005	-0.160046	-0.0958654	-0.0709796	-0.0702218	0.0614881	0.074836	-0.231303	-0.258547	-0.0440378	0.134207	-0.134418	-0.00381085	-0.0768691	0.0575797	-0.0810491	-0.127956			-0.0529547	0.0705359	-0.0445896	-0.0564993	-0.0577934	-0.0830116	0.047285	-0.00374547	0.0315749	-0.093532		-0.049208	-0.0402662	0.015926
Effect_size	msp_0734	0.0775907				0.197004			-0.0488604	-0.122733	-0.00683032	-0.0202802	0.0634826					-0.129671	0.0145065	0.0348928		-0.182885												-0.0087888			-0.143319	0.0195252	-0.0184329
Effect_size	msp_0735	-0.0444844	0.140773	-0.0455019	-0.0931624	0.0719543	-0.00824298	0.0238162	0.110621	0.00656436	0.0721991	-0.0610804	0.0374828	-0.0106302	0.020175	-0.0499029	-0.0136445	0.0728237	0.21146	0.036538	-0.203603	-0.0625486			-0.191289		0.136574	0.0788469	-0.0404038	-0.0625614	-0.203137	-0.127105	0.00754406	-0.0400687	-0.0261687	-0.0399943	0.0454922	0.14352	0.0900821
Effect_size	msp_0736c																																				0.0217447
Effect_size	msp_0737	0.148459	0.0172424	-0.260204	-0.0175238	0.265679	1	0.157541	0.118788	0.0788285	0.00135031	-0.0452807	0.0906957	0.202044	-0.0761546	0.081992	0.0414202	0.124888	0.240084	0.0113575	-0.06708	-0.0365335			-0.133962	0.0308233	0.114629	0.0771413			-0.129321	-0.0586199	0.0184782	0.130575	-0.0284169	-0.159744	0.0675119	0.109548	0.0575337
Effect_size	msp_0738		0.0241481					-0.0225353				-0.0202802																									0.00984415
Effect_size	msp_0739c	0.116381	0.0241481	0.0341539			0.030017	0.0504228	0.0632029	-0.0487542	-0.00802573	-0.0461492	-0.0595493		0.120979	0.0325289	0.0190131	0.0199559		0.0303255		0.132169	-0.0545041		-0.163962	-0.0231231	-0.00840253	0.00447952	-0.0706485	-0.0059277	-0.100994	-0.282403	-0.0685555	0.00390998	-0.0221969		0.032523	-0.00849149
Effect_size	msp_0740	0.0179892	0.171762	-0.148688	0.0636618	0.0482372	0.0448821	-0.0153173	-0.084461	0.0690321	-0.00499659	0.155286	0.119288	0.0213178	0.0235719	-0.000302314	0.0138934	0.0675285	0.0596737	0.00343938	0.120637	0.0296586	-0.0587743	0.535028	0	-0.00663216	0.00575685	-0.057135	0.00373671	-0.0516786	0.0100132	0.0248801	0.145806	0.00779759	0.0396949	0.136958	0.122034	0.0411991	-0.0631373
Effect_size	msp_0741		0.0213072					0.0184626						0.0455786	0.049878						-0.229137											-0.157601	0.120381		0.0424864		-0.0967699
Effect_size	msp_0742	-0.0956835	-0.0772847	-0.135113	0.0397921	-0.136659	0.177271	-0.118639	-0.0289316	0.0167675	-0.0391481	0.0428071	0.214393	-0.227459	-0.359876	0.262301	0.092952	0.138427	0.192326	-0.0569582	-0.196936	0.177812	0.045494	-0.303774	-0.312437	-0.114037	0.0168293	-0.0799094	-0.238611	1	0.274192	-0.0775886	0.0307843	1	1	0.201147	-0.13956	0.0220502	-0.0530494	0.153954
Effect_size	msp_0743												0.0791238
Effect_size	msp_0744		0.0496079		0.0379703			-0.181825		-0.0387861		0.0330886			-0.111264					0.0787572									0.0112058	-0.0338649	0.0678047				0.00345494
Effect_size	msp_0745	-0.0657285			0.000389055	-0.00891635	0.0577807		0.0576338	0.00287536		-0.0466524	0.00392621			0.0864097	0.0845563	0.0199559		0.0516823		0.168331					-0.039611	-0.0658933	0.0202551	-0.0235196	0.0133132			0.0399748	0.0895792	0.180092	-0.00993299	0.0677062	0.0292044
Effect_size	msp_0746				0.0141242		0.0487148			-0.0706516		-0.06343								-0.0177614							0.00319612		0.0817588	-0.00432543				-0.0117844				0.166614
Effect_size	msp_0747	-0.0650267	0.00391054	0.0674497	0.0598351	-0.0313543	0.00934618	-0.140498	-0.119303	-0.0836203	0.0686767	0.0911843	-0.0141148	-0.315412	-0.22465	-0.0698942	-0.00272352	-0.019022	0.102207	-0.0353708	-0.305847	0.043171			-0.401885	-0.019004	0.0400841	-0.0530653	0.0612274	-0.0869173	-0.162931	-0.311188	0.0272718	-0.0778292	-0.0830035	-0.0174828	-0.175506	-0.0801294	0.141076
Effect_size	msp_0748	0.196164	-0.049646			0.28256	0.0391058	-0.272267	-0.0288013	-0.135888			0.0147333		-0.243348	-0.00876783		0		0.00808199	-0.301775	-0.152668										-0.113232	0.160458		0.00367473		-0.136654		-0.0557104
Effect_size	msp_0749	-0.0306279	0.0334793	0.0530094		-0.0269562	-0.0764092	0.10247	0.101025	0.183266		0.134948	0.0142801	0.0290025	0.035542		-0.015601			-0.0176044			0.016428			-0.024681	-0.0354104	0.0814053	0.0637852	0.019523			0.120381	-0.00833224	0.0641908	0.244712			0.073621
Effect_size	msp_0750	0.0750232	0.0857268	-0.0917059	0.0335192	0.0794366		0.0727028	0.00187656	0.053097	0.0599899	-0.0200975	0.0124975	0.0329574	0.152323	0.0702889		-0.065458		-0.0100317		-0.0644106				0.0411427			0	-0.0162593	0.0238399		-0.181452	-0.0333377	-0.0352374	0	0.0457706	0.0520605	0.0425069
Effect_size	msp_0751	0.0255133	0.0830403	-0.119161	0.0865285	0.0376852	0.0229999	0.0266293	-0.00700123	-0.147364	0.0185996	0.00758704	0.140703	-0.159505	0.175531		0.0136177	-0.23984	-0.0661338	0.0203842		-0.234685				0.00282069	-0.0496434	-0.0483953	-0.0387401	-0.0260116	-0.105541		-0.00754406	0.00186527	0.043913	0.0100129	-0.0379416		0.279371
Effect_size	msp_0752												0.0530028				0.0627259	-0.0434357		-0.0221576		-0.0506176					0.0575845			-0.00886044					-0.00657542		-0.088373
Effect_size	msp_0753	0.0310878	0.0864237			0.0761943	0.104061	-0.0414524		-0.0244222			-0.0557897	-0.099817			0.0336708	-0.170964		-0.0321169		-0.181349					-0.0019231	-0.0253932	-0.0165484	-0.0342627			-0.0150156		-0.0237944	0.0581332	-0.0429056	0.160755	0.0383259
Effect_size	msp_0754c				0.0593345		0.0140994					0.0295982								-0.0118201			0.0994851				0.000583567		-0.0131939	-0.0315793					0.0582488
Effect_size	msp_0755c	0.0174253																0.00882076
Effect_size	msp_0756	-0.00138156	0.0959462	-0.192099	-0.0118445	0.0692215	0.00728254	-0.0240801	-0.0329712	-0.0031003	-0.0676364	0.0141156	0.102757	-0.151213	-0.0749678	-0.000562027		-0.00640327	0.107391	-0.0206753	0.172269	-0.0482134			-0.0121503	-0.0162084	0.226067	-0.0278312	-0.0231815	-0.0843943	-0.17164	0.0651599	-0.0427173	-0.00163981	-0.119112	-0.102169	-0.00332181	-0.105932	0.0125876
Effect_size	msp_0757	0.00168006	0.0555809	0	-0.0547967	-0.19135	0.0266601	-0.168412	-0.0379914	-0.0729014	0.0608618	-0.0284299	0.0143127	-0.25182	-0.219393	-0.0668664	0.0432686	-0.00769238		-0.0150239	-0.0349531	-0.225921			-0.0326077	-0.029787	0.0309691	-0.0275465	-0.0624884			-0.0256958	0.0968897	-0.113895	-0.0772623	0.00521848	-0.14967	-0.0757625	0.166181
Effect_size	msp_0758				-0.0447861	0.0798319	0.142248		0.0302881	-0.0706516	0.115252	-0.0565454	-0.00534493			0.055095		0.0699797		0.0267587		0.00420579					0.0204145			0.0127958	-0.0453226			-0.130339	0.105712	0.234299	0.0207889	0.0466329	0
Effect_size	msp_0759	0.172133	0.0490447	-0.116913	-0.0315868	0.112428	0.0903643	0.125009	0.0798765	0.0379668	0.0528286	-0.0256005	0.0272532	0.25994	0.0794038	0.0248607	0.0529359	0.0783796		0.00951687		-0.0674469			0		0.0457858	0.117309		-0.0163297	-0.0427391	-0.0956168	-0.133936	-0.035617	-0.0162552	0.297943	-0.127078	0.195627	0.00548966
Effect_size	msp_0760	-0.139702	-0.00427041	-0.13968	-0.0510939	-0.0316466	-0.066258	-0.135876	-0.170915	0.0124687	0.0123267	-0.0351332	0.0368377	-0.211019	-0.206013	-0.00114266	-0.0432194	-0.111664	0.0267099	-0.0526757	0.0915361	-0.353786	-0.0916161		0.19059		0.201994	0.00287374	-0.06641	-0.0127879	-0.161292	-0.146017	0.147085	-0.00663132	-0.042148		0.00667579	-0.0414767	-0.172709
Effect_size	msp_0761	0.131044	-0.0332224	0.0809706	-0.0550116	0.164708	-0.0197767	-0.0439451	0.11464	0.0748122	0.0280102	-0.0259859	0.0542625	-0.376478	-0.174581	-0.0135821	0.0488141	-0.0362914	0.00397824	-0.0276854	0.0277413	-0.102314			-0.111635	0.00607376	0.182027	-0.0623774	0.00325567	-0.104156	-0.133551	-0.143188	-0.107772	-0.116342	-0.0785866	0.157831	-0.0065408	-0.0829082	0.23995
Effect_size	msp_0762											-0.0375344				0.0372603			0.102207			0.00700965			0							-0.189445	-0.114871	0.00112401			-0.0975128	0.084121
Effect_size	msp_0763	0.164056	0.166781	-0.129599	0.0076465	0.131359	0.0042366	0.0445855	-0.0509871	-0.161447	-0.0141317	0.0382737	-0.0247035	-0.190937	0.167109	-0.143726	0.0450398	-0.165824	0.0859317	-0.107167	0.00370418	-0.0639855	-0.223422		-0.161998	0.0155205	0.0699487	-0.041865	-0.00665981	-0.202279	-0.343706	-0.0723149	-0.0165381	-0.203805	-0.0879015	-0.0897872	0.0420402	-0.114764	0.0390456	-0.123716
Effect_size	msp_0764		0.163189	0.0831956	-0.0030283	0.0214869	-0.0133578	0.0272633	0.103953	0.197067	0.192901	0.0217363	-0.00119981	-0.00856392	-0.00444247	0.0616787	-0.00475708	0.011761	0.0145065	-0.0363247	0.0226705	0.150313	-0.0741448			0.0993812	0.00332421	0.0421921	0.0797196	-0.0548904		0.0076508	0.132661	-0.0236794	-0.0141804		0.0630303	0.0502765	0.149916
Effect_size	msp_0765		0.17419		-0.0315868		-0.0372013	0.0492769		-0.0929858		0.051217	-0.000399935	-0.00617733	-0.0032018		0.0960032			-0.0121444						0.0763338		0.187876	0.272161	0.137882			0.064927	-0.024472	-0.0815549		-0.0105173	0.00282538
Effect_size	msp_0766	0.102835	0.0779274	0.0320149	-0.00186111	0.270582	0.0429563	-0.0168242	-0.082452	-0.158759	0.0524578	-0.00117793	0.0499977	-0.000480321	0.0394536	0.0536868		-0.174084	0.211622	-0.0524434	0.290757	-0.134748		0.44198	0.38118	0.0958168	0.0305749	0.061048	0.0312433	-0.105932	-0.153685	0.23565	0.0651499	-0.0805481	-0.0413473	0.0979613	-0.0220206	0.0941802	0.0342196
Effect_size	msp_0767	0.0796325	0.0857585	0.0965326	0.0232235	0.083979	-0.0591117	-0.0218312	-0.0272013	0.0847454	0.077468	0.1035	0.00903612	-0.00964169	-0.109523	0.0762402	-0.0488529	0.120937	0.126256	-0.0388368	-0.0843196	-0.0960533	-0.0427165	0.170103		-0.0412731	0.0796334	-0.0331195	-0.0152789	0.0445184	-0.0242652	-0.0459655	0.0261448	0.0103112	0.0654824		0.0896972	0.0249632	0.00425919
Effect_size	msp_0768			-0.0735623	0.00274076						-0.0902895	0.00747464				-0.0180464				0.0139021			0.0179949				0.0237727	0.0522437		0.209828	0.121604		-0.149925	-0.0281569	-0.0119207		0.0017328	0.0789134		0.0942917
Effect_size	msp_0769	-0.0755093	0.153239	-0.163477	0.00504178	-0.186327	0.0507071	-0.0267263	-0.0905154	-0.221188	-0.107338	0.0431333	0.154402	-0.289501	-0.10869	-0.0397488	0.00321663	0.145477	-0.0917176	-0.1352	0.468459	0.123491	-0.218871	-0.408815	0.195438	-0.14973	0.0927602	0.0943052	-0.219898	-0.260106	-0.124276	0.330631	-0.0900281	0.0572407	0.108331	-0.0408124	0.00769007	0.0267255	-0.178784	-0.152973
Effect_size	msp_0770			0.00334995	0.0124231		0.0816812					0.0673229				0.0186788				0.0266791			0.0729324			0.0554873		0.0364344		0.073941	0.115775			0.104373	-0.000689982		-0.00993299
Effect_size	msp_0771		0.0241481	0.0530094			0.0171893	0.0504228	0.0281993	0.00404704	0.14045			0.0836701	0.0890353			-0.0458488		-0.0125828							0.0419725	0.0427589	0.0172021		0.0678047		-0.0170177		0.0247841		-0.085182		0.001693
Effect_size	msp_0772	0.117845	-0.013854	-0.162645	0.0220866	0.122663	0.178237	-0.00624244	-0.011872	0.0661407	-0.0175555	0.0461407	0.122558	0.171126	0.114754	0.245904	0.0570785	0.144976	0.0145065	0.113465	-0.220631	0.0884919	-0.0144218	-0.0784063	-0.291608	-0.0549137	-0.0951764	-0.078269	-0.0682076	-0.0221396	-0.0276895	-0.275762	-0.128856	0.0106228	0.0916237	-0.0180044	-0.0713772	0.111809	0.112537
Effect_size	msp_0773	0.0604821	-0.0325689	0.103884	-0.0565159	0.21132	0.0611796	-0.0861085	0.0138706	0.017628	0.144524	-0.0073816	0.0780473	-0.332158	-0.116061	-0.0372132		-0.170457	0.182999	-0.0477806	0.0455919	-0.206945			-0.315908		0.0581549	-0.037867	-0.0572485	-0.0543065	-0.24636	-0.160693	-0.00106789	-0.127223	-0.00886182	0.0870599	-0.123772	-0.0544183	-0.00371591
Effect_size	msp_0774				0.0168297						-0.105559	-0.0133277															0.00823549	0.00833377					0.000545844		0.0248393		0.0489911
Effect_size	msp_0775		0.0334793		0.0598739			0.0718813	0.0600028	0.0247525	-0.102311		0.00555117	0.0303208	0.0720555			-0.0410226															-0.114871	-0.0170331			-0.0623625		0.0220251
Effect_size	msp_0776	0.024335	-0.0840591	0	0.0164472	0.0845657	-0.0448782	-0.162903	-0.029626	0.0289812	0.283885	0.0230497	0.0438162	-0.477258	-0.232975	-0.057133	-0.0148764	-0.13338	-0.0336109	-0.0543039	0.125903	-0.10033	-0.0385672		-0.0850522	-0.0296433	0.103615	-0.0505554	-0.0771383	-0.0692302	-0.209237	-0.0653224	0.191231	-0.047728	-0.0703457	-0.0836871	-0.17296	-0.0710384	0.114644
Effect_size	msp_0777	0.131636	0.0355795	0.0628864	0.00331339	0.169173	-0.00345932	0.058017	0.0433835	-0.0686601	-0.0113691	0.0230693	-0.00966126	-0.287764	0.173114	-0.119226	0.0678565	-0.176859	0.240516	-0.111999	0.12316	-0.110529	-0.174955	-0.405134	-0.131637	0.0791411	0.120833	-0.0337354	0.0756648	-0.139219	-0.317519	-0.0786695	-0.0473069	-0.27301	-0.151643	0.0539662	-0.101428	0.00724825	0.242744	-0.102435
Effect_size	msp_0778		0.0334793					-0.0338062	-0.0320015	-0.101326					-0.0560033																						0.0540868	0.176854	0.0518425
Effect_size	msp_0779	-0.087363	0.0231236		0.0644078	0.0183535	0.0632316	-0.126734		0.0710282	0.084447	0.038441	-0.0537122	-0.231671	-0.26846		0.0337715	-0.0635223	0.114231	-0.00308878		-0.179521					0.0448441	-0.0480449	-0.066971	-0.0908188			0.254513	-0.129808	-0.073152		-0.0386506	0.000773009	0.0827499
Effect_size	msp_0780	-0.0278452	0.0929717	-0.118212	-0.0190033	0.0781335	-0.139513	-0.0510382	-0.166813	-0.172096	-0.199224	-0.0116426	0.00625669	-0.408925	-0.0552714	-0.105004	0.0152899	-0.118978	-0.130914	-0.210777	0.237546	-0.334137	-0.209921		0.17257	-0.000604647	-0.00514078	-0.107717	-0.0200474	-0.127869	-0.1193	0.138983	-0.032285	0.00415006	-0.193059	-0.214544	-0.0141085	-0.0903856	-0.065465
Effect_size	msp_0781	0.183794	0.0275818	-0.0951879	-0.0677332	0.00959941	0.0593198	0.163863	0.163696	-0.0496464	0.02972	0.00165145	0.149462	0.152946	0.0615439	0.0507365	0.116796	-0.0227509	0.214781	-0.0226178	-0.0369077	-0.234653			-0.0199336		0.0191802	0.00534146	-0.0309845	-0.0431674	-0.317255	-0.0977989	-0.177302	-0.132056	0.0023796	-0.297486	-0.0141643	0.101474	0.355122
Effect_size	msp_0782		0.124673					-0.00205699	0.0302881	0.00269803	-0.100687		-0.0023805		0.034175	0.0549105		0.0178552																-0.033305			-0.0190234		0.135186
Effect_size	msp_0783		-0.00820789				-0.00650157	-0.077137		0.0012323				-0.0968812				0.00882076		-0.000613316								-0.0142965	-0.00568877						-0.00810686		-0.156972		0.165729
Effect_size	msp_0784		0.0213072					-0.024145		-0.0406781				-0.00617733				-0.0458488			-0.166753	-0.0506176										-0.195656					-0.127089		0.104119
Effect_size	msp_0785		-0.0734197	0.0420356	0.0524835	0.127189	0.171106	-0.0659391		0.0126437	0.0830015	0.0317241	0.0613392	-0.0726982	-0.13278	-0.0370983	0.0227136			0.0290325			-0.0609449				-0.102932	-0.0512178	-0.0496144	-0.122203	-0.0365556		0.0271701	0.0457395	0.0545114		0.0297241	-0.0475408	-0.0705808
Effect_size	msp_0786						0.00929716		0.0576338			-0.0376928	0.0521249				0.0604908			-0.0159779							-0.0429144		-0.00914122	-0.0524968				-0.0166099	-0.0381201		0.0212668	0.0104074
Effect_size	msp_0787		0.0109003					-0.0778936		-0.108608				-0.134466	-0.0349522	-0.0213365	0.0164124	0.011761		-0.0329435		0.00420579				0.00333988	0.0415928	0.0618406	0.0287065	-0.0393243	0.00601465			-0.0613471	-0.055202		0.014883	-0.0302911	-0.0852521
Effect_size	msp_0788							0.114652	0.0240216	0.0777494				-0.00617733	0.0463778	0.0200012																	-0.0170177				0.0464707		-0.001693
Effect_size	msp_0789		0.0213072				0.0391058	0.0171439		0.00451842																											0.0467857
Effect_size	msp_0790		0.0213072						0.0552324					0.0422024	-0.00106727			0.011761			-0.166753											-0.0956168							0.0292044
Effect_size	msp_0791		0.0213072		0.014381	0.018959	0.0118494	-0.0225353				0.0345102	0.12385	0.138962	-0.00106727	-0.0187541				0.0262181			0.0266316				0.00300811		0.0495478					0.0413632	-0.0223823		-0.0147183	0.0783253
Effect_size	msp_0792	0.00727238	0.0241513		0.0989253	0.080383	-0.0401157	0.00394582		0.2064	0.117449	0.0569464	0.111884	-0.16395	-0.0536874	0.271226	-0.0103705	-0.00862444	0.155808	-0.0299151			0.177147			-0.0669438	0.102961	-0.00709675	-0.0672161	1	0.195784		0.407853	0.101504	0.157072	0.0840264	0.050612	0.0201867		0.237658
Effect_size	msp_0793	0.0719335	0.145515	-0.0886211	0.00143352	0.120587	0.148699	0.220468	0.210475	0.103943	0.148409	-0.00839319	0.0410895	0.182079	0.0413552	0.051454	0.033984	-0.0402705		0.0406411	-0.252439	-0.0382513	-0.00244384				0.0200805	-0.000988991	-0.0159439		-0.116127	-0.137714	-0.103726	-0.036029	0.0292565	-0.141106	0.020758	0.0739817	0.0443369
Effect_size	msp_0794	0.0793965	0.198941	0.0447068	0.0616447	-0.06472	0.0625197	0.0929129	0.0513833	-0.13283	0.17788	0.104881	0.172428	-0.0950259	-0.030304	0.00538971	0.0723731	0.0587322	0.0242495	-0.0340272	0.204469	0.0172854	0.0432417		0.462862	0.0114262	0.0222744	0.0600954	0.0604587	-0.0285002	-0.0873144	0.073531	0.0449196	0.117602	0.0066512	-0.0449287	-0.00491907	-0.0563747	-0.00113917
Effect_size	msp_0795		0.00622874	0.0394084		0.0781388		0.0418252	-0.0180667	0.0700936	-0.102311	0.00792424	0.0208949	-0.0803565	-0.0349522	-0.00410899		-0.0861253									0.041168						-0.0685555	-0.0428175		0.294013	-0.0885889		0.0827499
Effect_size	msp_0796		-0.0700021				0.0708307	-0.0740516		-0.0549723	0.0429425	0.00562224	-0.00146643		-0.0951232												0.0593812						0.0303619				0.0157666	0.00339046	-0.0197659
Effect_size	msp_0797				0.0847221							0.00530549																									0.0212668
Effect_size	msp_0798		0.136961					0.0761085	0.109779	0.0325629	0.0811991		0.0353267	-0.00617733	-0.00106727			-0.068455				-0.126011						0.00361476					-0.0170177		-0.00113157		-0.0369088		0.133792
Effect_size	msp_0799
Effect_size	msp_0800	0.0350822	-0.106924	-0.252803	0.0489051	0.117159	0.0934739	-0.0739424	-0.0411903	-0.236751	-0.033052	0.0453556	0.202147	-0.206542	-0.248783	0.0611402	0.0389605	-0.0235408	-0.0624203	0.00722576	0.160444	-0.090037		0.102062	0.0546541			0.00550887			-0.157196	0.127924	-0.0535337	-0.113898	-0.0314352	-0.193762	-0.0509921	0.0524753	0.156513
Effect_size	msp_0801				0.115369		0.0213687					0.0782347								0.00817948			0.0284679			0.00282069	-0.0502338	-0.0118739	0.0399927	0.0460891			-0.0150156		0.0144292
Effect_size	msp_0802		0.0850902					0.0492769		-0.0716405	-0.0806734	-0.00912383			0.0463778		0.0427654	-0.0434357		-0.0232345		-0.0506176	-0.0328545				-0.0596217	-0.0253807	-0.0474614				-0.207421	-0.0535655	-0.00554119		-0.0436486	0.052123
Effect_size	msp_0803
Effect_size	msp_0804	0.0174253	-0.0131221	0.144497		0.0819055	-0.0779711	-0.194122	-0.0436682	-0.117606	0.0920446	0.0379914	0.0544575	-0.312608	-0.23065	-0.070693	-0.0175439			-0.0561919		0.0842115			0.194405	0.187637	0.033213	-0.000280398	0.103915	-0.060519	-0.104169	-0.0459655	0.069868	-0.0809008	-0.103994		-0.0342105		0.107049
Effect_size	msp_0805				0.152614		0.0267729					0.108828								0.0329927			-0.0441149			-0.0347093	-0.0724008	-0.0132218	-0.0147733	0.119145				0.141192	0.100642
Effect_size	msp_0806	0.0816744	0.0490447	0		0.083979		0.0205282	0.1139	0.0247664	-0.0597461	0.00357698	0.00583584		0.0518288		0.127412	-0.150774	0.126256		-0.319527	-0.052739					0.041168	0.0419688			0.0228145	-0.236169	0.0128141			0.0715781	-0.0705916		0.00425919
Effect_size	msp_0807		-0.0426734			0.121176		-0.0480578	0.00750623	0.0044055			-0.00173305		-0.0431077			0.0144079				-0.030737						0.0299266			-0.0171864			-0.0236794		0.0878661	0.0237141		0.0439006
Effect_size	msp_0808	-0.0230329	0.0103454			0.00923398		-0.131103	-0.147137	-0.108085	0.119786	0.02377	-0.0226853	-0.259425	0.00447552	-0.0769126		-0.221316	0.347229	0.000348248		-0.130401					0.0827004	-0.0244746	0.0106915	-0.0335808	-0.136667		0.0115327		-0.05429	0	-0.0421521	0.0327205	0.119053
Effect_size	msp_0809								0.117285	-0.0309472																							-0.0150156				-0.151906
Effect_size	msp_0810	-0.0306279	-0.0279748		0.0715348	-0.0290298		-0.0338062	0.0302881	-0.027263		-0.00689456			0.035542	0.00570016						-0.0931187												-0.0315159			-0.130428	-0.00173367	0.0745022
Effect_size	msp_0811	0.0558889	-0.0966624	-0.174448	0.0160647	0.174232		-0.0644046	0.111612	-0.0694877	0.125629	0.0635544	-0.0428242	-0.132545	0.0473158	-0.0603337		-0.100973	0.0158595		-0.0903912	-0.229425			-0.334904	0.0449627	0.120928			0.0132678	-0.197435	-0.445394	-0.207166		0.00557799	0.103983	-0.0797053	0.0376577	0.371591
Effect_size	msp_0812			0	0.0172122					0.00287536	-0.0634802	-0.0376928	0.0534355			0.135705		0.00882076		0.0348928			0.0921382								0.0983352				0.0593257		0.0300638	0.169647
Effect_size	msp_0813		0.0241481				0.0224414													-0.00682885															-0.0113731
Effect_size	msp_0814	0.122875	0.0106329	-0.0312518	-0.076108	0.184734	0.119648	0.143886	0.00297065	0.0538203	-0.0949291	0.00976175	0.160977	0.257856	-0.00372357	0.168506	0.0448012	0.106336	-0.13815	-0.0464011	0	0.0138994	-0.00347965		0.136139		-0.0374667	0.14588	-0.0452314	-0.0340207	0.0347176	-0.0743051	-0.163255	-0.0745113	-0.0055005	0.0521272	-0.0687334	0.167651	0.0085717
Effect_size	msp_0815		0.00778592				0.0226922	0.0176967				0.00530549	0.0362046	-0.0415632	-0.000547216			0.0661013			-0.155995	-0.0483168	0.0379381				0.0134433					-0.135236			-0.0116431	0.171516	0.0426947
Effect_size	msp_0816c				0.00308335	-0.0364272	0.0849587	-0.024145		-0.0406781			0.239908	0.0438905		0.0843026							0.0560122				0.0691958				0.00601465		0.0287207	0.0615269	0.052141		0.0794907	0.115841
Effect_size	msp_0817	0.0199146	0.0833094	0	-0.0453379	0.0214869	-0.0568147	-0.0157538	0.03984	-0.0435871	0.0320956	0.013649		-0.0540501	-0.0498955		-0.0327484			-0.0674087	-0.0843196		-0.102451		0	-0.03552	0.020171	0.026485	-0.0232222	-0.042897		-0.0956168	0.00896988		-0.0972234		0.0492204	-0.0230864	0.10371
Effect_size	msp_0818	0	-0.141861	-0.0968093	0.0284716	0.0944968	0.0567829	-0.151359	-0.0071631	0.121825	-0.00166911	-0.0360211	0.0091237	-0.369685	-0.225089	-0.122994	0.055028	-0.133784	0.21146	-0.0381231	-0.0953035	-0.162573			-0.267307	-0.0542952	0.0569198	-0.129442	-0.0221617	-0.13631		-0.00918243	0.183516	-0.183929	-0.0117706	0	-0.104234	-0.0779825	0.214019
Effect_size	msp_0819	0.0174253	0.0874214					0.0184626		0.0454081			-0.00173305										-0.0115637			0.0135218	-0.0359617	-0.0351188	0.0445585	-0.0444605	0.0692473				-0.0526861		-0.0308485		0.206545
Effect_size	msp_0820	-0.00721979	0.177977	-0.140079	0.0219215	0.081578	-0.112631	-0.0138814	0.031139	-0.0818814	-0.0897945	0.0435414	0.0776342	-0.233778	0.204008	-0.121281	0.0635067	-0.390817	-0.212015	-0.146681	-0.175949	-0.360716	-0.250007		-0.607516	-0.0900541	-0.00758227	-0.121457	-0.0864053	-0.122954	-0.157361	-0.265743	-0.0690262	-0.109438	-0.246541	-0.289184	0.0116687	-0.07744	0.0428285	-0.0744353
Effect_size	msp_0821	-0.0109749	-0.069545	0.144497		0.117766	-0.0284905	-0.142448	-0.0574778	-0.0847414	0.0350133	-0.0514675	0.0510845	-0.288951	-0.0179458	-0.0416942	0.0781877	-0.237833		0.0657343	-0.1775	-0.11611			-0.0628335	-0.00621736	0.00347451	-0.0417237	-0.0485507	-0.0273575	-0.0799768	-0.252476	0.097915		-0.0436269		-0.0634567		-0.15228
Effect_size	msp_0822	0.0174253	0.134932		0.0598739			0.0515688	0.00375312	-0.0231698	-0.00683032				-0.0032018			0.119735		0.0183585		0.111142				0.0689514	0.0135517							-0.0519857	-0.0115081		-0.128878	0.0832564	-0.0228068
Effect_size	msp_0823		-0.0679731					-0.120327		-0.120062					-0.0936012		0.0954204			0.0626688	-0.166753						0.0280112		0.0165411	-0.0289403					-0.0321832		-0.0125507		0.0207295
Effect_size	msp_0824							0.0504228		-0.0250484					0.049878			-0.109668				-0.163622															-0.0975128
Effect_size	msp_0825				0.112025			-0.0225353		-0.0397321						0.0685771				0.0348928
Effect_size	msp_0826
Effect_size	msp_0827				0.0798472					0.103157		0.0224693	0.108632							0.0190735														0.00115469			0.0227322		0.149916
Effect_size	msp_0828	0.05802	-0.0970373	-0.0863422	-0.0498231	0.182319	0.221284	0.0238587	0.0273868	0.110564	-0.0108876	-0.094818	-0.0679752	0.193249	-0.112502	0.301666		0.254273	0.42965	0.0375481	0.0272746	0.0679338	0.00204083		0.170104		-0.0512392	-0.0155046			-0.0800469	0.020265	0.0288329	-0.0197066	0.0900532		-0.00408207	0.0488991	-0.0622733
Effect_size	msp_0829	-0.0710578	-0.0373998			0.0781388		-0.195075		-0.118846	0.0429425		-0.0699767		-0.207395			0.156276			-0.0843196	0.0453371					0.0208893					-0.189445	-0.0170177				0.0575685		0.131326
Effect_size	msp_0830		-0.00820789					0.0318648		0.0520404			0.0530028	-0.0487769	-0.00438599						-0.103037					0.0804905	-0.018472		0.0736368			-0.164453		0.0737799			-0.0964925		-0.0228068
Effect_size	msp_0831	0.0395255	0.0436575	-0.040868	0.0698166	0.415706	0.0415472	-0.00884346	0.120005	0.0773834	0.0796814	-0.00785625	0.0423232	-0.141121	-0.137249			-0.0485318		0.0663072		-0.099127	-0.0354445				-0.0616527	-5.01211e-05		-0.0779927	-0.0217944		0.0271701		0.0940141		0.0442922	-0.00567082	-0.0976744
Effect_size	msp_0832		-0.00820789	0.00334995	0.176442	0.083979	0.145289	0.156989	0.0552324	0.233421	0.17242	0.104721	0.169873	-0.0487769	-0.0471615	0.00599248	0.0577025			0.0908469		0.00700965	0.0578818				-0.0836921	0.076414	-0.0449505	0.0705285	0.0497478		0.0153769	0.148989	0.127691			-0.00333398	0.0272575
Effect_size	msp_0833	-0.144212	-0.124261	-0.416403	-0.146957	-0.291153	0.0593321	-0.195737	-0.111214	-0.0491765	0.0380005	-0.0244328	-0.123612	-0.352719	-0.357215	0.187018	0.0486233	-0.0376912	-0.105338	-0.0112125	0.0572545	-0.0783425	0.00428349	-0.451848	-0.393701	-0.0566753	0.0516402	-0.0783585	-0.12111	0.281751	-0.157706	-0.181213	-0.0573908	1	0.267339	-0.218283	-0.078939	0.149533	-0.220942	0.0195239
Effect_size	msp_0834				0.0164472		0.0832484					0.0632522								0.0922242							-0.0122336							0.051755	0.0409595
Effect_size	msp_0835	-0.178668	0	0.144497		-0.0749777	9.28829e-05	-0.0517889		0.0787906			0.0299235		-0.164557	-0.0401392		-0.143741	0	-0.00961039		-0.106407				0.0408083	0.0698582	-0.00820847	0.0631799		-0.0885832		-0.0235449	-0.0611513	0.000828466		-0.128024	0.140612	-0.103162
Effect_size	msp_0836		0.0241481				0.011632	-0.0225353		-0.0714731				-0.00411822			0.0679611										0.0027261							0.0284724	-0.00129717		0.0633369
Effect_size	msp_0837	0.198331	0.0505087		0.0240716	0.329773	0.02322	-0.0264244	-0.0746425	-0.169083		0.0902498	0.134763			-0.0262169	0.0467949	-0.0485318		0.0325196		-0.0198537	0.00750456								0.0223018			0.00677209	0.00704332	0.0653539	0.00727563		0.00161853
Effect_size	msp_0838	0.0199146	0.0241481			0.0214869		-0.024145		-0.0397321		0.00357698						0.00882076		-0.0345754						0.111867	0.0576873		-0.01826	-0.0158472					-0.0570831	0.244712	-0.0408483	0.114993
Effect_size	msp_0839	-0.0326698		0	0.112466			0			0.0621994	0.00380054	0.0682605																					-0.0558847			-0.176744	0.00801518
Effect_size	msp_0840	0.112605	0.035603		0.0172122	0.0753728		0.00527155	0.0359788	0.0892015	-0.13355	0.0387782		-0.15511	-0.165631			-0.117538	0.0145065	0.0265267	-0.197709	-0.178275			-0.111635			0.0476051				-0.174279	-0.039396		0.0325561		0.0628479	0.0589129	0.0595276
Effect_size	msp_0841	0	0.0819142	0.11654	0.0357148	0.095211	0.065487	-0.0228404	-0.0482628	0.0601392	0.133813	0.0575865	0.0500509	-0.207665	0.033102	-0.00776315		-0.223744	0.126256	0.00395631	-0.00640184	-0.177398			0.115047	-0.0301168	0.0113142	0.0104699	-0.0382214	-0.0658442	-0.201182	-0.141704	0.052533	-0.141302	-0.0443672	-0.195863	-0.0540555	-0.0905793	0.0850615
Effect_size	msp_0842	0.149777	-0.146178	-0.0379489	0.0202708	0.152129	0.0638535	0.0252299	0.0468631	0.0860191	0.125234	-0.0265972	0.0319628	0.0194345	-0.0100095	0.044344	0.0231371	-0.0958588	0.126256	-0.0301741	-0.244672	0.0153828			-0.136635		0.0248239	0.00709904	0.0218779		-0.110762	-0.240172	-0.0322972	-0.0995282	-0.0671374		0.0057827	0.0421065	0.195007
Effect_size	msp_0843		0.0241481		0.0593345		-0.0542506	-0.0225353		-0.0397321		0.0766934		-0.00617733		0.0155974	0.0319098			-0.0587244			-0.069244			-0.0110071	0.15339	-0.0935863	-0.0583932	0.0634505	0.174922			0.101473	0.0752495			0.00393576
Effect_size	msp_0844c				0.0748483		-0.0464144		0.00562967	0.0573236		0.0715858	0.0199207				0.00673951			-0.0147066			0.0177505			-0.00543109	-0.00749033	0.0416364	-0.0257245	1					0.0353767		0.00236291
Effect_size	msp_0845	0.0420497	-0.0443469	-0.0735623	-0.0480462	-0.0615599	-0.0503781	-0.0472363	-0.060188	-0.258706	-0.0876142	-0.111644		-0.0100236	0.0995252	-0.0488296	0.0383693	0.0952671		-0.0441644	-0.252439	0.0546552			-0.136635	-0.00704884	-0.0326511	-0.0807896	-0.0395481	-0.0968449	-0.100138	-0.34702	-0.147362		0.0617743		0.0295646	-0.0303004	-0.0495215
Effect_size	msp_0846		0.0241481		0.00274076		0.0369489	0.077137	0.101025	0.103894	0.0448096	0.0597364	0.0629132		-0.00106727		0.0196659			0.0155743			-0.0152181				-0.0397891	-0.0180522		-0.0310482			0.115683		-0.0334796		-0.0967699
Effect_size	msp_0847	0.10455	0.135292		0.088131	-0.0453481	-0.0416069	0.0841782	0.261808	0.233842	-0.10407	0.0917275	0.0471654	-0.0136825	0.0571262			-0.0822421		-0.0555445	0.0545638	-0.159383			-0.303695	0.0360131	0.0324805	0.0512599		-0.0302978		-0.185299	-0.118727	-0.0445707	-0.0635634	0.0998165	-0.0565374	-0.0361727	0.272084
Effect_size	msp_0848	-0.128824	-0.0212283	0.160637	-0.0309894	-0.0266449	0.126258	0.044871	-0.0870598	0.00634061	0.053255	-0.0156692	0.0201982	0.0472976	0.0886909	-0.0448648		0.011761		0.00805748		0.202096				-0.00737614	0.0189731	0.0196198	-0.0315916	-0.0561581	-0.0168045		-0.0633179	0.0519852	0.0113231		0.0342813	0.0909328	-0.00974618
Effect_size	msp_0849	0.0174253		0.0530094															0																		-0.0429056
Effect_size	msp_0850	-0.00489284	-0.0327754	0.0699711	-0.0469932	-0.109003	-0.00571938	-0.120392	0.0423683	-0.0256512	0.116003	0.0411091	0.0578259	-0.402157	-0.18114	-0.0646572	0.127624	-0.154642	0.311616	-0.0310823	0.020338	-0.0698342			-0.291608	-0.0168174	0.0606364	-0.00394952	-0.0338906	-0.122038	-0.228906	-0.0708199	0.148293	-0.126036	0.00276461	-0.149568	-0.010702	-0.101755	0.0857415
Effect_size	msp_0851	0.0815218	-0.0654743	-0.221553	-0.0679078	0.104172	0.0302655	-0.266112		0.0285827	0.0103232	0.0240481	0.011373	-0.380405	-0.23724	0.0397358	0.0118927	0.0913198	0.0178066	0.0617645	-0.3474	0.0639182	-0.0669822	-0.405134	-0.353318		0.071759	-0.0579945	-0.135389	-0.0780591	-0.0104318	-0.376116	-0.0227002	0.0723432	0.165842		0.0303811	-0.0784849	0.156006
Effect_size	msp_0852	-0.0021291	0.027708		0.100384	-0.0399105	-0.100059	-0.076745	-0.0443502	0.024499	-0.0806366	0.119918	0.120607	-0.14941	-0.0850679	0.117984	-0.0105259	0.195487	0.114231	-0.069798		0.00500638					-0.0319583	0.0492526	-0.0615298	-0.0911618	0.0720362		0.298322	-0.00931759	0.0914915	0.16294	0.161925	-0.0857611	-0.0172808
Effect_size	msp_0853c	-0.01413	-0.0375116		0.0273901	0.101269	0.238837	0.0495068	0.265557	0.220005	0.230947	0.197134	0.26941	-0.245905	-0.244241	0.0833108	-0.0138007	0.011761	0	0.031829			0.110184				0.0281139	-0.0585984		0.0470477	0.0595394		0.0303619	0.207776	1					0.171615
Effect_size	msp_0854	0.106455	-0.045623	-0.0350297	-0.0323572	0.113017	0.067204	0.0300484	0.204903	0.169872	0.187811	-0.073576	-0.0225831	-0.264495	-0.0506818	-0.0606919	0.0380779	-0.24058		-0.0383853	0.0183324	-0.164034			-0.136635		-0.0319624	-0.0625622	0.0351953	-0.0197941	-0.111637	-0.220158	-0.0311228	-0.141158	-0.0705796	0.228724	-0.12491	0.104528	0.0794928
Effect_size	msp_0855	0.130969	0.143193	-0.0310901	0.0405297	0.0760492	0.0776469	0.111534	0.0482462	0.0395284	0.0644879	0.0403559	-0.0436999	0.113864	0.118983	0.0122152	0.0408529	-0.12167	-0.0901825	0.0292645	0.0100978	-0.201927			0.157084	-0.0076093	0.0346736	0.0216838			-0.10908	-0.0367474	-0.11054	-0.069906	0.0118248	-0.0816642	0.0383463	0.128818	0.0886246
Effect_size	msp_0856	-0.0651039	0.242142		0.0172122	-0.190462	-0.0532452	0.133905	-0.031961	-0.0632349		0.00712523	-0.0514622	-0.00411822	-0.00106727		0.0741645	-0.33334	-0.137449	-0.0524266	-0.102071	-0.243938			-0.0326077		-0.0328094		-0.0351402	-0.0753427	-0.109932	-0.0569972	0.0742347		-0.0335219	0.047957	-0.107398	-0.021657	-0.0216912
Effect_size	msp_0857												0.0785945																								-0.00993299
Effect_size	msp_0858	-0.11392	0.102462	0.0296292	-0.00782966	-0.104625	-0.0485733	-0.100804		-0.0766221	-0.0864798		-0.0601751	-0.168856	-0.0988941	-0.0462763	0.0439107	-0.0210738		-0.0337098	-0.0504878	-0.138088			0.0819811	0.0168759	0.0243706	-0.0717477	-0.0275078	-0.0911022	-0.133821	-0.00153016	0.0324191		-0.0839419	-0.0675165	0.0476615	-0.0549497	0.00661418
Effect_size	msp_0859		0.0241481		0.0471498		0.122463	0.150775	0.381122	0.183266	0.0828231	0.00734817	0.0152014	0.0836701	0.171848	0.252372		0.178203				0.0576051												0.028988			-0.0657327	0.192549	0.209931
Effect_size	msp_0860	0.118341	-0.0249016	-0.222866	0.00974375	0.107915	-0.0526468	-0.0119004	0	0.00612177	0.0395484	-0.0468622	0.0484439	-0.044317	-0.00391731	0.160513	-0.0497929	-0.258813	0.27705	-0.0892597	0.094538	-0.250121	-0.0939588		0.038349		0.147915	-0.0795814	-0.21026	-0.0862414	-0.308618	0.069295	0.245125	-0.0994005	-0.034403	-0.184239	0.0206799	-0.0470363	-0.0989309
Effect_size	msp_0861	0.111874	0.0960749	-0.109134	0.0166066	0.35011	0.0244106	0.182438	-0.104005	0.0635415	-0.0663276	0.0433721	0.164622	0.305266	0.378092	0.167179	0.0443512	0.0165783	-0.0684895	0.041032	0.0645827	0.0213285	-0.221621	-0.322749	0.161449	0.0154523	0.0746194	-0.0182451	0.0207662	-0.180049	-0.0271634	0.117864	-0.189513	-0.251671	-0.0656342	0.272762	0.0576634	0.209348	0.128162
Effect_size	msp_0862																													0.0571648							-0.0470737
Effect_size	msp_0863																	-0.143842				-0.151123
Effect_size	msp_0864						0.202913																0.205768				-0.00159626			0.142853							0.0451914
Effect_size	msp_0865				0.200637		-0.0105436					0.0801128				-0.0180464	0.00626768			-0.0223705			-0.0615933			0.00579561	0.0348953	-0.122584	-0.0120927	0.0522114				-0.00445481	0.047668			-0.0253957
Effect_size	msp_0866c
Effect_size	msp_0867	0.0096965	-0.0450808	0.140698	0.0164472	-0.0767558	-0.0288003	-0.127212	-0.0115712	-0.104908	0.167919	-0.0131859	0.0319628	-0.215004	-0.215052			-0.0418107		-0.0350335	0.0515187	-0.0646274			-0.0326077		0.0896863	-0.0290394	0.0181641		-0.086934	-0.0660473	0.0967466	-0.0666459	-0.0569875	0.183785	-0.0385225		-0.0121338
Effect_size	msp_0868				0.0225634		-0.0150981					-0.0197489	0.106249							-0.0126964			0.129034				0.0204312	-0.00579571	-0.0480827	0.0292251				-0.00833224	0.148042			0.114993
Effect_size	msp_0869								0.101025	0.0764023			0.0651157					0.011761	0.0145065																		-0.0667518
Effect_size	msp_0870		0.0850902					-0.024145	0.219557	-0.0397321					-0.0032018																						0.0535268
Effect_size	msp_0871	0.0796325	0.0393265	0.0744381	0.042331		-0.00181217	0.260649	-0.061221	0.220774	0.141656	-0.00575068	0.173528	-0.0500952	0.109087			-0.0894943		-0.0026679		-0.12511				0.0141175	0.0784338	0.00643351	0.0207281				0.0452161	-0.0302066	-0.0533819	-0.0116066	0.0306541	0.0828409	0.0712188
Effect_size	msp_0872	-0.0710578	0.150526			0.310753	0.0253938	0.0722025	0.0568605	-0.00743892	0.0291778	-0.0300861	0.0458362		0.0618354	-0.0323108	0.0337879	0.0414205		-0.040814	0.0226705	-0.034318			-0.0326077		0.0299612	-0.0699675	-0.0243288		-0.103834	-0.038611	0.069868		0.0669651	0.377235	-0.0719488	0.180106	0.212341
Effect_size	msp_0873		0.156075	-0.040868	0.0311247		0.0993298	0.225248	0.260545	0.255527	0.0186577	0.0156604	0.112741	0.0213433	0.148606			-0.0819241	-0.0901825			-0.0871111	0.00480694				0.00834223	0.0566262		-0.025532			0.0490127		0.0896987		0.0372235		0.0439006
Effect_size	msp_0874	-0.0378326	0.295638	-0.128763	-0.0797578	-0.0107942	-0.0477214	0.12329	-0.0332644	-0.0114711	-0.0199968	-0.0411315	0.0253456	-0.158009	0.159411	0.0573895	0.0983929	-0.148378	0.0959125	-0.0259098	0.0534864	-0.0059246	-0.157525		0	0.0338681	0.068698	0.011868	0.011187	-0.155876	-0.203564	-0.0626435	-0.0647712	-0.0219183	-0.0593183	0.0384213	-0.00468244	-0.150975	0.264274
Effect_size	msp_0875																																				-0.0465958
Effect_size	msp_0876	0.0548243	-0.144009	0.00603328	0.0598739	-0.0467855	0.0273982	-0.11488	-0.0800125	-0.0620601	-0.0862766	0.0486205	-0.00945018	-0.303367	-0.162285	-0.0284761		0.0589336		-0.0467228		0.165129				0.0441515	-0.0471518	0.00901784	-0.0139031	-0.0553712	-0.0801875		-0.0363977	-0.0207721	-0.0313689	0.101384	-0.14963		-0.0248032
Effect_size	msp_0877	-0.0621703	-0.0770129		-0.0484916	-0.0439112	0.0963644	-0.0410899	0.0173995	-0.0537938	-0.027424	-0.0854655	-0.0713433	0.0485312	-0.157332	0.154848		0.0270626	0.0600841	-0.0361609	-0.31677	-0.149604		-0.243975	-0.099668			0.00149383			-0.0821677	-0.161874	-0.0389806	0.0468294	0.0127746		0.0319045	0.160963	-0.0512034
Effect_size	msp_0878	-0.0710578	0.0393265	0.057087		0.145897		-0.0113777	0.143085	0.0664389	-0.00683032			0.0989609	-0.0498955	0.0511888												0.147263		0.0130038			0.0635	0.0554512	0.0605346		0.0207889
Effect_size	msp_0879	0.0336996	0.150627	-0.0442267	0.0392812	0.0365608	-0.0938581	-0.175224	-0.166884	-0.235626	-0.0247234	0.000977516	-0.103517	-0.351515	-0.0561161	-0.175401	0.00521793	-0.196485	-0.110487	-0.0818674	0.0286257	-0.0784103			0.124675	0.0478206	0.160448	0.0420915	0.0279985	-0.0744827	-0.156626	0.0455526	-0.00709767	-0.268849	-0.134797	-0.126742	-0.0872487	-0.0705239	-0.0636215
Effect_size	msp_0880									-0.023796																										0.244712
Effect_size	msp_0881	-0.0211282	-0.0093058	-0.0362597	0.00876577	0.188787	-0.109274	-0.093342	-0.0108207	-0.0966158	-0.0356698	-0.00331662	-0.0500528	-0.0434691	-0.0261532	-0.14718	-0.0499755	-0.197667	0.0809094	-0.159777	-0.0899666	-0.185349	-0.0596605	-0.225075	0.086788	-0.0768818	-0.115739	-0.0193301	-0.143595	1	0.0733416	-0.0908006	0.0186538	-0.0286631	-0.0611877	-0.137406	-0.186494	-0.185971	-0.144181	0.101511
Effect_size	msp_0882c
Effect_size	msp_0883	-0.112539	0.0140756	-0.074344	-0.0729861	0.0176202	0.0974916	-0.0188498	-0.0102199	0.0255624	-0.0474081	-0.0412459	-0.0311318	0.0987708	-0.123671	0.00978876	0.00676218	0.126435	0.250022	-0.0161924	0	0.0713201	-0.0643871	-0.243975	-0.282751	-0.0564408	0.0863904	0.107866	-0.145773	0.0217269	0.0107132	-0.0493268	0.218642	0.00503014	0.0888921	-0.141119	0.0615847	-0.0616721	-0.0101415
Effect_size	msp_0884	0.125862	0.108752	0.104581	0.110489	0.272853	0.0148798	0.10069	0.0308273	-0.0102751	-0.0469991	0.0768066	0.118082	0.197806	0.160075	-0.0402631	0.0194824	-0.17244	0.0596737	-0.06192		0.0358154	0.056957			-0.0495544	-0.0126556	0.0185898	-0.116403	1	0.393223		0.0869129	0.172607	0.105028	-0.0540132	-0.120477	-0.0399409	-0.149568	0.235373
Effect_size	msp_0885	-0.0873034	0.103538	-0.0823262	-0.0161167	-0.0263665	-0.046879	-0.143761	-0.152776	-0.00847342	0.0900152	-0.0301768	-0.068282	-0.398866	-0.400665	-0.11079	0.00664785	-0.184269	0.0190543	-0.0410127	-0.132434	-0.164801	-0.084532		-0.460779	-0.0506097	0.0379611	-0.0853973	-0.110794	-0.0767073		-0.272613	0.0359522	-0.149764	-0.0363756	0.0206873	-0.0877165	-0.151108	0.112096
Effect_size	msp_0886	0.0275349				0.0261594	0.00738413	0.0268498	0.0807254	-0.0666803		0.00380054	0.0370406		-0.0560033			-0.0882259		0.0200094		-0.0315028			0.0546541		-0.00133022			0.0431469				-0.057393	-0.00657542		-0.0704673
Effect_size	msp_0887	-0.0657285			0.0920616	-0.0640455	-3.2055e-05	0.0750801		0.0664389		0.0957135	0.0357589	0.201774	0.115511	0.0908066	0.0436304	0.250242		0.113689		0.20978	0.00181381			-0.0437557	-0.042322	0.0121026	-0.03096	0.047837	0.117326			0.0133078	0.177143		-0.115839	0.110736	0.215322
Effect_size	msp_0888						0.0326973	-0.0778067					0.105183		-0.000760986	0.0269252	0.0317543	0.00882076		0.0487625		0.00700965				0.0220021			0.00840901						-0.0133288
Effect_size	msp_0889															0.0675723																		0.139365
Effect_size	msp_0890c	0.0197025	0.0220148			-0.00133331	0.0171893	-0.159125	0.0740658	0.174008	-0.079468		-0.000399935	-0.393031	-0.28783	0.061094	0.0746653	-0.0021195	-0.0661338	-0.012514	-0.189561	-0.0881346				0.188345	0.099124		1			-0.0824111	0.0712551	0.0676602	0.00494458		-0.00153355	0.0508099	-0.0268879
Effect_size	msp_0891	0.0300708	-0.0256436			-0.094027	-0.0191619	0.0768103		0.00315254	0.0466766	-0.00876367	0.039848		0.039643	-0.036178	0.0119526	-0.012903	0.0145065	0.0192434		0.0789891					0.140668	-0.0482958	0.0608544		-0.0696899		0.0320031		0.0146448		-0.06044	-0.0456455	-0.0621884
Effect_size	msp_0892	0.0796325	-0.0303061			0.018959	0.0392591	0.0685953		0.112487			0.0239454	-0.0607715	-0.00380493	0.00742417		0.0204743				-0.0635873					0.0695519		0.0397874		-0.0365556		-0.0150156	0.0480344			-0.0581805	-0.0363688
Effect_size	msp_0893	0.00646139	0.189517	-0.0583975	-0.00703517	0.0366533	-0.0865379	0.0747415	-0.137772	-0.22918	-0.0100982	0.0038017	-0.0617965	-0.191754	0.178096	-0.0793948	-0.016734	-0.271592	0.00592179	-0.156863	0.162442	-0.0751087	-0.244169	-0.520756	0.0170138	0.0570413	0.129525	0.102588	-0.0180727	-0.0171982	-0.16734	0.16546	0.0424551	-0.250116	-0.14288	0.0506688	0.0856287	-0.172123	-0.107384	-0.132896
Effect_size	msp_0894		-0.0256436					-0.0778067				-0.0743112		-0.0607715						0.0526956			0.0321631				0.0990398			1					0.0882776
Effect_size	msp_0895														-0.0577534					-0.0066804						1	0.0139854		0.13242						-0.0113056		0.0307432
Effect_size	msp_0896											0.00380054	0.0213325			0.0392646		-0.0615229				-0.124211												-0.042648			-0.0425213	0.0674749
Effect_size	msp_0897		0.0213072																							0.0692903			-0.0156417	-0.0131224							-0.0273092
Effect_size	msp_0898	-0.0219602	0.00686185	-0.155312	0.057354	0.188734	-0.201543	-0.0235716	-0.133124	-0.170294	-0.181986	0.0247604	0.088287	-0.255499	-0.0312066	0.00411324	-0.0513357	-0.223086	-0.183449	-0.176367	0.0977567	-0.0938708	-0.222277	0	-0.0767361	-0.0321772	-0.149631	9.70852e-05	-0.0606586	-0.0825597	0.206053	0.10871	0.00129965	-0.062835	-0.225879	-0.142141	0.0397671	-0.0387253	-0.188793	-0.081447
Effect_size	msp_0899																			-0.0066804							0.0492121										-0.0196324
Effect_size	msp_0900		-0.00273596			-0.0269562	0.0392591	-0.120327	0.143085	-0.0406781			0.0345464		-0.0936012			0.0157546		0.00799118		0.00901149						0.030195		0.0214465					0.00342699		0.0165615
Effect_size	msp_0901	-0.0326698			-0.0552265	0.116716	0.0708307	-0.0791255	0.103953	0.00231084		-0.0146752		-0.0573953		0.30545				0.0667573															0.0300397			0.0846799
Effect_size	msp_0902	0.032206	-0.0700021			-0.0105375	0.0391058				-0.140053							0.0157546				0.0883615				0.0906848		0.0299266					-0.147362		0.0301879		-0.0585483		0.16877
Effect_size	msp_0903	0.0693905	0.161317	-0.027956	-0.0453782	0.192092	-0.0724763	0.0259854	-0.112354	-0.27306	0.108171	0.0419858	0.00263298	-0.267779	0.0792256	-0.191573	0.0164106	-0.230496	0.157228	-0.111361	0.109147	-0.095073	-0.238604	-0.374192	-0.138861	0.10686	0.0276759	-0.106011	0.123987	-0.115326	-0.223055	-0.0213164	0.151437	-0.290693	-0.198099	-0.0507701	-0.0349717	-0.0915998	0.110576	-0.100714
Effect_size	msp_0904	-0.100563	0.0399038	0.057087		0.00553195	0.00814437	-0.134354	0.067761	-0.0968686	0.185815	0.022108	-0.0692202	-0.24675	-0.19228	-0.0260899	-0.0102274	-0.0390813	-0.0661338	0.0287334	-0.288239	-0.0839157			-0.267307	-0.0214848	0.087446	-0.0106633	0.069494		-0.111424	-0.272537	0.116857	-0.077303	-0.0524173	0.108125	-0.0957376	0.0198943	0.0341044
Effect_size	msp_0905c
Effect_size	msp_0906	0.0113864	-0.0431844	-0.011096	-0.0469755	0.00893738	-0.175782	0.0170468	-0.111317	-0.207775	-0.189263	-0.0459337	0.0160728	-0.129663	0.0963159	-0.146863	0.0552073	-0.262935	-0.264452	-0.143134	0.0171033	-0.146157	-0.154227	-0.18006	0.104146	0.00330298	0.0492715	0.0163028	0.00829756	-0.0572348	-0.0265943	-0.0277617	-0.170546	-0.21972	-0.21316	0.0645874	-0.101808	-0.0945683	-0.157763	-0.0877329
Effect_size	msp_0907	-0.140784	0.0117923			-0.0348464	-0.0087436	-0.0339777		0.00654759				-0.160713				-0.150774		-0.00425059	-0.196582	-0.149471			-0.0850522		0.0961653	0.0553139	-0.00868503	0.0181164		-0.118339		-0.0239075	-0.0455512		-0.144445		0.000608455
Effect_size	msp_0908	0.0075654	0.0403462	-0.107262	0.0133155	0.191609	0.0746503	0.0754721	0.04855	0.0273373	0.14027	0.00191884	0.100745	0.016143	0.0596976	0.134458	0.0890842	0.00289284	0.211876	-0.0494816	-0.146011	-0.122864	-0.178317	-0.412265	-0.0340277	0.000493516	0.0594956	0.00108315	-0.0274024	-0.197411	-0.119252	-0.159951	-0.0332603	-0.0441362	-0.0244579	0.0311474	0.01094	-0.00565805	0.124623
Effect_size	msp_0909			0.0530094				-0.154274	0.00187656	-0.0979994	0.086071	0.00357698					0.0342972									0.112586			0.0353536						-0.0387286		-0.0173249
Effect_size	msp_0910	-0.0297322	-0.253692	0.0112831	0.0478669	-0.183298		-0.295938	0.174202	-0.00911073	-0.129048	0.00934089	0.00726755	-0.400124	-0.388409	-0.0403259		0.0683266	0.135928		-0.189561	0.0740546		0	0.0223269						0.00909681	-0.0187645	-0.0325887	0.07161	-0.0113731	0.0715781	-0.00257958	-0.0564703	-0.111647
Effect_size	msp_0911		-0.000911988					-0.037684	0.0600352	0.0390524	-0.00683032				0.0332046			-0.0283291	0	0.0607916		0.0140387											0.0287207				-0.134092		0.107505
Effect_size	msp_0912				0.0593345											0.0503175		0.00882076				0.00420579															0.0489911
Effect_size	msp_0913		0.0213072					-0.024145
Effect_size	msp_0914	0.0796325				0.125385	0.122286			0.147786		-0.0355335				0.192136							0.0924096											0.00112401	0.0300397			0.0824939	0.151863
Effect_size	msp_0915c
Effect_size	msp_0916	-0.127887	-0.132487	0.133998	0.0127077	-0.313824	0.0131994	-0.128938	-0.00165302	0.0831485	0.223565	-0.0462487		-0.24088	-0.143339	0.128441	0.0935735	0.0233043	0.0439832	-0.0461623	0.173483	-0.0266998	4.84119e-05		0.170104	0.0263666	-0.0229777	-0.0220355	0.0142438		-0.25492	0	0.175184	-0.0940009	0.0215843		-0.0420599	0.174321	-0.0147339
Effect_size	msp_0917	0.102978	0.0624414	0.0508009	0.0268072	0.102752	0.0654746	0.0732997	-0.0166564	0.0108371	0.246974	0.0369871	0.174387	-0.329729	-0.0710698	-0.0409941	0.00578214	-0.119329	0.0440847	-0.0238199	-0.190416	-0.105477	-0.16196		-0.245722	-0.0374877	0.0990533	-0.0973442	-0.0131492	-0.187835	-0.186408	-0.325799	0.168466	-0.0373534	-0.0653032	-0.0311968	-0.00203128	-0.0910725	0.0143742
Effect_size	msp_0918				0.0272144					-0.0569958		-0.035038																	0.189699						0.0177353		-0.00993299
Effect_size	msp_0919																						0.0921382							0.0499977
Effect_size	msp_0920							0.0184626	0.103953	0.0463541		0.00498875			-0.0032018																								0.073621
Effect_size	msp_0921									-0.0722947												0.00420579															-0.0198556	0.0846799	0.126824
Effect_size	msp_0922	-0.0461131	-0.124673			-0.0408877	-0.0110838	0.0504031	0.0576338	0.183575		0.00380054	-0.019286	-0.157088	-0.111264	0.0390105		-0.0321063		0.00752773		-0.0931187					-0.0206832	-0.0196745						0.0158693	-0.0320586		-0.0465958		0.105812
Effect_size	msp_0923
Effect_size	msp_0924	0.210731	-0.108099			0.280507		-0.0796134	0.071467	0.119632	0.0191891		0.193424	-0.209013	-0.201423	0.193374		0.111497	0.126256		-0.22137	-0.0175173									-0.146846	-0.185701	-0.0693943	0.000874231			-0.0999436	0.0290162	0.193053
Effect_size	msp_0925	-0.1508	-0.0280208		-0.00234414	0.02808	0.232657	-0.0615497	0.0543611	0.125518	0.0440039	0.0447946	0.240346	-0.123144	-0.105953	0.405189		0.109468	0.0145065	0.097934	0.0226705	0.109385	0.0395616		0.109308		0.147479	0.0361858		1	0.279109	0.133284	0.198727	0.165551	0.236226	0.0465066	0.00204786	0.0191998	0.0458071
Effect_size	msp_0926	0.0174253			-0.0165508	0.164547	-0.0264848		0.247212	0.00337253	0.084447	-0.0345789	-0.0214125			0.0286188		0.106582	0.0145065	0.133689			-0.0055343		0.109308		0.010939	-0.0543391		-0.0660138	-0.0257866	-0.0911695	0.0677809	0.100469	0.123636			-0.0491739	-0.001693
Effect_size	msp_0927		0.0874214			0.125385		-0.0225353		-0.13714	-0.140053	0.00357698	-0.0382035	0.112055	0.147244	-0.0199579		0.154905	0.0145065			0.0107355									0.0118868		-0.149925	0.00425192			0.0141767	0.0219247	-0.063484
Effect_size	msp_0928		0.0375374	0.0530094			0.0117407	-0.0338062		-0.0814073	-0.00683032		0.0149438		-0.0560033			-0.0434357		0.0052207		0.0966196				0.278267	0.0348518	0.0359857	0.0822493		-0.00899707				-0.0224993		-0.0508509	-0.0185496	-0.0404164
Effect_size	msp_0929		0.119653	0.20434	0.0223485		0.0853704	0.10395	0.137093	-0.032423	0.144463	0.00309466	0.0474182	0.0658561	0.0657898	0.0718316		0.0699797	0.102207	0.00808199		0.063272				0.0909609	0.0699079	0.1051	0.0862226				0.0303619		0.00367473		-0.122253	0.264455	0.216614
Effect_size	msp_0930	0.0445814	-0.0181804	-0.327636	0.0282867	0.221592	-0.118264	-0.0313322	-0.208626	-0.241883	-0.0703856	0.0022401	0.0599042	-0.259487	-0.0266861	-0.188093	0.0404031	-0.287412	-0.0800054	-0.16146	0.0313559	-0.230648	-0.288484	-0.667014	-0.102083	-0.120366	0.0200047	0.0372147	-0.21768	0.0119664	-0.107335	-0.0593986	-0.0341974	-0.185755	-0.224583	-0.262866	-0.0353924	-0.115404	-0.249581
Effect_size	msp_0931	0.20758	-0.0471216	-0.0156259		0.0720617	-0.0288429	-0.176903	-0.0157483	-0.186741	0.0960817	0.00351082	0.0491927	-0.360518	-0.139608		0.00323958	-0.183294	0.206869	-0.00924787	0.0903912	-0.106097			-0.191289	0.00777656	0.0457758	-0.0405462	-0.0487139	-0.116601	-0.257353	-0.0342131	-0.117889	-0.0830208	-0.0279941	-0.0247843	-0.112473	-0.0413468	0.00567062
Effect_size	msp_0932	0.116694	-0.0800984	0.00602387	-0.0393097	0.143343	0.0311175	-0.071035	0.0335259	-0.0560279	0.100981	-0.00122415	0.150925	-0.228887	-0.114734	0.0272096	0.0171657	-0.181121	-0.0661338	-0.0311879	0.0485752	-0.0629625			-0.0607516	-0.0016528	0.0276179	-0.0715789	0.0168336		-0.149412	-0.0770071	0.0505525	-0.0167016	-0.0465188	-0.0212921	-0.0848022	-0.0370894	0.089856
Effect_size	msp_0933	-0.0973705			-0.00585865	-0.0956482	-0.038127	0.0197814		0.0454081		0.0531329	0.210989	0.0438905		0.0792691				6.2458e-05							0.00631983	-0.0283053		-0.00775123	0.0701709		0.179066	0.174007	0.12301		0.0801701	0.05743
Effect_size	msp_0934							-0.024145																													0.0439476
Effect_size	msp_0935	0.0275349	-0.063915		0.00274076	0.248204	0.276284	0.0396367	0.270504	0.148412	0.144463	0.122755	0.292361			0.166293	0.0576163	0.0242625	-0.0781582	0.07939		-0.0931187	0.0186048				0.0762604	-0.00442971					0.0303619	0.134589	0.153587
Effect_size	msp_0936c
Effect_size	msp_0937		0.0375374		0.112025			0.028734		-0.0227695		0.0991373	0.158419	0.0342757													0.0593812								0.0591351		-0.04269		0.0168427
Effect_size	msp_0938	0.124351	-0.00820789				0.0274606	0.0303104	-0.0193701	-0.0732761	0.0429425	-0.0266635			-0.0966452	0.0380406	0.0489516	-0.169351		-0.0338602		-0.176738	0.0109841					0.0655117					0.160458	0.106508			0.0222178	0.0300843
Effect_size	msp_0939	0.147054	-0.0125673	0.00334995	-0.0310732	0.183915	0.116181	-0.0148997	-0.0428468	0.0310612	0.0702251	-0.000660955	0.0096461		-0.181751	0.139372	0.236035	-0.0156652		0.0265755		-0.195819					0.113987	0.0470063		-0.0165408			0.0153769	-0.0527675	0.0463114	-0.00749261	0.0366366	-0.0221942	0.0329239
Effect_size	msp_0940								-0.0304014	-0.136514			0.0791238					0.111781				0.00901149															-0.0798521	0.0852407
Effect_size	msp_0941		0.0874214				-0.00615938	0.0184626		-0.0302103	-0.00683032	0.00357698			0.0481279			-0.0882259		-0.0371563						0.0346613	-0.0153852	-0.0142965							-0.0422517		0.0294463
Effect_size	msp_0942	0.0922192	-0.0612772	0.116484	0.0408359	0.0842817	0.13019	-0.0130754	-0.00179717	-0.205022	0.24168	-0.00547983	0.123876	-0.244686	-0.154443	0.0803398		0.0941269	0.298368	0.0502649		0.199621				0.0154758	-0.0344461	-0.0109638	-0.0246734	-0.0240713	-0.0684142		0.102906	-0.024889	-0.0107224	0	0.0730527	0.0472367	0.0128334
Effect_size	msp_0943		-0.0988214	0.301664				-0.0870677	-0.03984	-0.0397706	0.113793		-0.0283091	-0.186473	-0.0330849	-0.0147915			0.100833	0.00528141	-0.166753	0.094968			0.0819811		0.00291411				-0.0570954	-0.104511	0.0663539	-0.0527675	-0.0226749		-0.19581		-0.0138247
Effect_size	msp_0944	0.023982	0.041	-0.0603165	-0.0493595	0.160426		0.0918115	0.135787	0.0390806	0.0431434	-0.0552484	0.0191445	0.0213433	-0.0416935	0.0790916	0.160689	-0.0833696	0	0.035021	0	-0.0821532			0		0.0593812	0.105774									-0.0792638	0.0277084	0.169584
Effect_size	msp_0945	0.139406	0.0877304	-0.174811	-0.0332801	0.0167576	-0.0497933	-0.0153895	0.15156	0.109461	-0.0300196	-0.00957294	-0.0327901	-0.366423	-0.146772	-0.0273253	-0.0114165	-0.304672	-0.0474349	-0.0944529	-0.0789561	-0.00933893			-0.230094	-0.0577127	0.05055	-0.0832801	-0.130172	-0.10254	-0.219931	-0.111209	0.0736083	-0.0731188	-0.106896	-0.0377401	-0.0868044	-0.185456	0.0750646	-0.0357049
Effect_size	msp_0946	0.122575	0.158833		0.0758762		-0.0268817	-0.00205699	0.083451	-0.0244222	0.086071	-0.0817469	0.0153199	0.0290025	-0.00380493	-0.00671247	-0.0020727	0.1941		-0.0411178		0.113144	-0.0539433			-0.0108199	-0.0329669	0.0436631	-0.077286	-0.0234941	0.0395873		0.0967466	0.0569261	0.0910536	0.244712	0.0230275	0.0221797
Effect_size	msp_0947	-0.0724328	-0.0094679	0.195583	-0.032614	-0.0755586	-0.0555303	-0.0880341	-0.0600358	-0.116143		-0.0141403	-0.0785503	-0.270577	-0.0245664	-0.0805522	0.050717	-0.0335178		-0.0133281	0.0454577	-0.220629			0.218706	-0.0566127	0.0294029	-0.0442948	-0.0942351	-0.096965	-0.141244	0.00438293	0.195525	0.0349322	-0.030412	-0.0240738	-0.164483	0.000191242	0.0688173
Effect_size	msp_0948				0.0593345								0.0152014																0.0397874									0.020176	-0.0243273
Effect_size	msp_0949	-0.0984935	0.0534368	-0.0917059	0.0291043	0.0225695	0.0238818	0.0411451	-0.0355792	-0.0491428	0.00302986	-0.0571775	0.187945	0.0674165	0.0508416	0.0143992	0.0250078	-0.137043	0.200887		-0.0105312	-0.154324			0.377001		-0.0128353	0.0852842	-0.0246734	0.0304597	-0.102271	-0.0569972	-0.0466856	0.00976744	0.0663978		-0.157275	0.000686204	-0.038667
Effect_size	msp_0950c	0.164413	-0.0900449	0.0446628	0.0425317	0.198491	-0.000434987	-0.152516		0.053345	0.239782	0.0494517	0.203778	-0.260446	-0.0549969	-0.0165199		-0.0610791		0.037606	0.0317678	-0.227291	-0.0238822		-0.136635	0.0346574	-0.0517235	-0.0319774		-0.0449404		-0.164453	0.0343471	-0.0906778	-0.0504104	0.132369	-0.0656668		0.0109793
Effect_size	msp_0951	0.0174253	-0.0303061			0.018959		0.0718813	-0.0352016	0.00654759				-0.0573953	-0.0577534	0.0503175						-0.0483168														0.171516	-0.115499		-0.0608928
Effect_size	msp_0952										-0.00455355		0.0791238			0.0949426																	0.0320031					0.0852407
Effect_size	msp_0953	0.0733986	-0.192307	0.274079	0.119735	0.065201		-0.263404	0.00892508	-0.174374	0.0797862	-0.00432548	-0.0113612	-0.301019	-0.212766	-0.0549186	-0.00509231	-0.0500849	0.0445166	-0.0538817	0.0830949	-0.02647				0.0433664	0.103262	0.00258373	0.00395351	-0.0452786	-0.0922681	0.0248366	0.0968468	-0.0645718	-0.0311592	0.0260924	-0.16539	-0.0639909	0.0424217	0.0292991
Effect_size	msp_0954	0.0174253																0.0157546													0.0692473						0.0217447	0.0421399
Effect_size	msp_0955	-0.0127699	-0.103959	0.140698		0.150822		-0.167641	-0.0344402	-0.143791			-0.0346712	-0.233738	-0.151245			-0.21437		-0.0433095		-0.0571039				0.0282902	0.11059	-0.0194652	0.0171638	-0.0288195			0.0320031		-0.0488127	-0.00961107	-0.195867	0.00595409	0.0858529
Effect_size	msp_0956																			-0.0220969			0.140786												0.130119
Effect_size	msp_0957		0.0897526	0.0530094							-0.00683032		0.092733		-0.00106727			-0.0410226		0.0118087							0.124244	0.00853703	0.0909324								-0.0628827		0.211624
Effect_size	msp_0958							-0.024145			-0.00683032																						0.157382
Effect_size	msp_0959	0.0409371	0.0609546	-0.0204753	-0.0104457	0.0726411	-0.0463316	-0.157951	-0.106835	-0.0468081	0.142374	-0.0428131	-0.0156459	-0.308823	-0.188657	-0.12578	0.0493269	-0.138497	-0.0106795	-0.0379637	-0.383178	-0.204985	-0.154442		-0.446297	-0.0726194	0.0770257	-0.0858743	-0.00442175	-0.17397		-0.467165	-0.0890905	-0.146463	-0.0661579	0.0210187	-0.0265465	-0.105361	0.0254021
Effect_size	msp_0960	-0.0785572	-0.0152131	-0.0683078		-0.0410347		0.0696147	-0.0827011	-0.111737	0.11998		-0.0429786	-0.0162038	0.0868827	-0.0549142		-0.206901	0.173615	0.0495362	0.135587	-0.160929		0.0578799	-0.0121503	0.107989	0.041015		0.051887		-0.0659872	-0.137075	0.0124803	-0.127197	0.0142001	-0.0135033	0.0872823	-0.0524679	0.121608
Effect_size	msp_0961	-0.0531201	0.12802	0.137348	-0.03133	0.0161825	-0.0590496	0.0735243		-0.0336414	-0.00455355	-0.0404844	-0.0499083		-0.0053269		0.169935	-0.0189708		-0.0271902	-0.307671	-0.198674			-0.291608		-0.0425615	-0.0094977	-0.0483174	-0.0927441	-0.0719062	-0.313489	0.0967466	-0.0283718	-0.0798527		-0.0823703	-0.0426706	-0.0290828
Effect_size	msp_0962		-0.0984947										0.0362046		-0.0783212					0.0189085							0.0495134	0.0503075			0.0992172			0.171888			-0.0143037
Effect_size	msp_0963c	0.0796325	-0.0279748			0.127189	-0.0557492		0.0261104			-0.00625814	-0.0159812		-0.000760986		-0.00140311	0.0748059		-0.00425469			-0.0393122				0.175996	-0.0509864	-0.0559304	-0.065125		-0.032548		-0.0557441	-0.0202917		0.0599154	-0.0624792	0.0699409
Effect_size	msp_0964	-0.0657285	0.0201164	-0.0735623		0.0319667	-0.0111636	-0.111724		0.00269803	-0.0889518	-0.0202802	0.00526649		-0.0727797		0.0978402	0.0801523		-0.00785261	-0.155995	-0.100664			0.109308	0.0764562	0.00404113	0.0291333			-0.0743312	-0.0291219	0.0189516	-0.0172447	0.0830399	0.241253	0.034083		0.131005
Effect_size	msp_0965	-0.00272323	-0.0393734				0.00331008	-0.0930495	-0.094351	-0.0268996			0.0907655	-0.232547	-0.221319	-0.0380929		-0.0145158		-0.0266791		0.0868227				0.104111					-0.0324985			-0.0562469	-0.0313577		-0.089406		0.015554
Effect_size	msp_0966						0.0297836				0.084447						0.0936692	-0.0840247		-8.12665e-05		-0.0279025				0.0780765							-0.0170177		-0.00480346	0.13859	-0.090943		0.165729
Effect_size	msp_0967	0.0199146	-0.0948467	0.0530094	0.112025	0.018959	0.0278028		0.111655		0.0466766	0.108722	0.164444	-0.129193	0.0238329				0	-0.0336495	0.0575797	0.00901149	0.0502269					-0.0112118	0.0288317	0.00457001		-0.130132	0.0303619	0.0504067			-0.0439154
Effect_size	msp_0968c													-0.00411822						0.0502623			0.0460897						0.0306999
Effect_size	msp_0969		0.0533968	0.00334995	0.00475742		-0.0158243	0.122718	0.152632	0.226468	0.124461	-0.0132859		-0.0242971	-0.188064					0.0005531							-0.00211226	0.0449392		-0.0121279			0.0938138		0.114445		-0.0335569		0.134495
Effect_size	msp_0970	0.175006	0.0383976	-0.104647	0.0956193	0.126989	0.0749216	0.0626543	-0.1339	-0.155451	0.00270061	0.0680282	0.160165	-0.110268	-0.118396	0.0476217		0.0260897	-0.0432141	0.0118011		0.0286862	0.00470357				-0.018258				-0.0812413		0.0263156	-0.0260217	-0.0279451	0	0.132188	-0.0804208	-0.0169651	0.116064
Effect_size	msp_0971												0.00583584				0.0357322			-0.0457052							-0.0227773	-0.0221031						0.0492845	-0.0355547
Effect_size	msp_0972																			-0.0124452										0.0565048
Effect_size	msp_0973		-0.0966707	0.0530094				-0.079644	0.0552324	0.0346313		-0.0130441	0.0365798	-0.133148		0.0511888		-0.0158115				-0.0614085											-0.0170177				0.0784901		0.0272575
Effect_size	msp_0974c	-0.019562	-0.155017	-0.266776	-0.00262757	-0.137733	0.153911	-0.304729	-0.0200702	0.208781	0.0161368	0.0531408	0.216648	-0.62802	-0.584968	0.182524	-0.0173428	0.00446267	-0.0698008	-0.0403652	0.0112989	-0.0981776	0.0431946		-0.0893077		0.0128553	-0.147892		0.00527565	-0.00111307	0.0231673	-0.030138	0.360473	1	0.153459	-0.0575736		-0.0406702	0.0682394
Effect_size	msp_0975							-0.024145						-0.00617733	0.0463778																						-0.0664121
Effect_size	msp_0976	0.0103648	0.0809889	0.100398	0.0160647	-0.0230508	0.0121524	0.00692229	-0.0826723	-0.0561562	0.0934517	0.0634537	0.116642	-0.266957	0.00429613	0.0232839	0.0305593	-0.103333	0.372587	-0.0473476	0.134977	-0.0479503			0.136139	-0.0113286	0.0352453	-0.0533816	-0.0556369	-0.0794815	-0.180771	-0.110172	0.0106348	-0.100395	-0.0581624	-0.103983	-0.0931129	-0.0464257	0.0408811
Effect_size	msp_0977	0.109288	0.179148	0.0475755	0.0788529	0.401459	-0.00948348	0.279553	-0.0716485	0.0437032	-0.0573866	0.0421857	0.0709757	0.368867	0.426212	0.0224436	0.0404081	-0.0180803	-0.00300965	0.0304847	0.120247	0.0404431	-0.189409	0.236682	0.238735	0.0749382	0.0960759	0.0243339	0.089252	-0.134679	0.034882	0.153098	-0.225816	-0.368825	-0.0588697	0.322375	0.114191	0.158613	0.0898677
Effect_size	msp_0978	0.0199146	0.132903	-0.0735623	0.0158853	0.16779		0.148443	0.0606155	-0.0459977	0.0110669	-0.0407187		0.287832	0.210869	0.0640597						0.0090839			0							-0.100064	-0.0687763	-0.0164253		0.116116	0.0785198	0.108804	0.118418
Effect_size	msp_0979	-0.0967093	-0.0453002	0.0294313	0.0558242	-0.0616441	-0.0539887	-0.096845	-0.132584	-0.136496	-0.00176095	0.0194099	0.033422	-0.323327	-0.175675	-0.0694256	0.072781	-0.244263	-0.199616	-0.105789	-0.0597439	-0.0349197	-0.0879569		0.185957	0.0164669	0.0768143	-0.0678639	-0.00219339	-0.141068	-0.243229	-0.0472241	0.18135	-0.0346735	-0.0440432	-0.153592	-0.0410162	-0.130387	0.0620964
Effect_size	msp_0980				-0.00657691							-0.0638679																							0.0142001		0.0212668	0.0998657
Effect_size	msp_0981	-0.0748887	-0.102143		-0.00720329	-0.0726068	0.0990492	-0.00110978	-0.03984	-0.0140187		-0.0411773	0.0657478					0.0259956		0.00526914			-0.0134666					-0.0159451						0.0745883	-0.0550118	0.123607	0.0241249
Effect_size	msp_0982		-0.0966707		-0.0770859		0.0121756	0.125009	0.119213	0.0334714	-0.106045	-0.0949967	0.000953166	0.0985367	-0.00601937	-0.0467764				-0.0175683	-0.126307				-0.0850522			0.0364344				-0.232166	-0.155773	-0.122813	-0.000910776		-0.0191018	0.040552	0.125669
Effect_size	msp_0983		-0.0877805		-0.0398227			-0.146292			0.144463	-0.0960244	0.112366	-0.251208	-0.244336	0.275554				-0.0221576	-0.0843196		0.0226187	0.170103			0.0828268			0.159324	0.13299	-0.00161264	0.160458	0.109778	0.0114959			0.0589129
Effect_size	msp_0984				0.0847221		0.0225668	-0.0791255				0.0688453			-0.0053269															0.065623					-0.0114406		0.0571241
Effect_size	msp_0985	0.0121206	0.0694622			0.308623	-0.00257288	-0.111881	0.00375312	0.112617			-0.0250928		-0.262789	-0.0390875	0.130537	-0.0470151		0.0132992	-0.0843196	-0.152775				0.0342492	-0.0523711	-0.052081	-0.0418942	-0.0624486		-0.100064			-0.0525216		-0.0187235		-0.0212864
Effect_size	msp_0986	-0.00464338	0.0430443	-0.148043	0.0567962	-0.0281285	0.0826546	0.0359514	-0.0089659	0.00586098	0.153436	0.0970652	0.11961	-0.42514	-0.307145	0.0088404	0.0305004	0.0731607	0.350056	-0.110678	0.0535114	-0.0474292	-0.229678	-0.621397	-0.339893	-0.0758596	0.135173	0.0265054	-0.146821	-0.223445	-0.329889	-0.133609	0.00833448	0.074141	-0.0398146	-0.102876	-0.0569997	-0.182876	-0.198436
Effect_size	msp_0987			0.133998	0.0240716							-0.0351092	0.0785945							0.0188639										0.0328654							-0.0971413
Effect_size	msp_0988	0.0380616	0.153403	0.201421	-0.0312957		-0.0150886	0.000369928		-0.083068	0.0466766	-0.0158328	0.0195935	-0.0460566	-0.0407775		-0.0155845	-0.0458488	-0.0816266	-0.0612265		0.0540048	-0.102847			-0.049605	-0.0189817	-0.0697717	0.0367733	-0.0862887	-0.0279132		0.0320031	-0.0892507	-0.0324193		-0.102143		0.00274483
Effect_size	msp_0989		0.0334793				0.0708307																				0.104068								0.0299231		-0.083509
Effect_size	msp_0990	0.0174253	0.051853	0.0338619	0.067112		0.0792857	0.0530187	0.181527	0.181118	0.0161592	0.0125659	0.227079	-0.00569323	0.241678	0.0569692	0.00397896	-0.0264405		0.00400291		0.0140387					-0.0416462	-0.0569334	-0.0463251	-0.0682585			0.117824		-0.0733501	0.123607	0.0450568	-0.0275479	0
Effect_size	msp_0991												0.0534355					0.121836				0.0678736															0.0637084
Effect_size	msp_0992		-0.154161	0.0773573				-0.0849441	0.0281993	0.0581525	-0.0634802	-0.0134694	0.0937549	-0.183103	-0.0942954					0.0371388		0.00420579						0.0711023		0.0573729							-0.0120323		0
Effect_size	msp_0993	0.0275349	-0.065944		0.00274076	0.0279635	-0.0166492	-0.0414524	0.0576338	0.0390524		-0.0285657	0.0510584		-0.0457945		0.0355501	-0.0470151		0.0280592	-0.0931954	-0.0585187			0		-0.00217531	-0.0248027	0.0107649	0.00656488		-0.195656			-0.0381796		-0.18119		0.218109
Effect_size	msp_0994		0.0213072									0.0483037			-0.00106727																						0.0447768
Effect_size	msp_0995									0.0444621			0.0148943			0.0276385				-0.0126515																		0.15563
Effect_size	msp_0996	-0.0417214	-0.0426734	0.0530094		-0.037914	-0.0335429	0.016281	0.022068	0.00722499	0.0429425	-0.0518928	0.013973	-0.133148	-0.0466029	0.0265686		-0.122759		-0.0145315		0.0465535				0.00631825	-0.0229844	-0.0219497	-0.03266	-0.0526815			0.0287207		-0.0622132		-0.00550866		-0.020737
Effect_size	msp_0997													-0.00411822						0.0333275							0.00803462								-0.0174438
Effect_size	msp_0998			0.057087	0.0598739																																-0.0960269		0.073621
Effect_size	msp_0999		0.0874214		0.069349	0.197004	0.0171893	-0.024145		-0.0406781	-0.00683032	-0.0398396		-0.00411822																	0.0223018		-0.0170177	0.0255268	0.0251705		0.0451914	0.114596
Effect_size	msp_1000													-0.00807343	-0.0577534																						0.0314397		0.073621
Effect_size	msp_1001	0.0466864	0.102462	-0.0883501	-0.0550336	0.105195	0.0139494	0.261915	0.220723	0.152246	0.046735	-0.0929031	-0.0117404	-0.0751713	-0.0639777	0.0386879		0.0300969	0.129778	-0.0122083	-0.267592	-0.195034					0.0238969	0.0683634				-0.287419	-0.0168508	-0.0992485	0.0215843		0.0165307	-0.00664286	0.208153
Effect_size	msp_1002										-0.0616132	0.00380054						0.0748059									0.041015									0.244712
Effect_size	msp_1003									-0.0397321							0.0945132			-0.0458423								0.10715	-0.0138945						-0.0197859		-0.0660724
Effect_size	msp_1004	0.197628	-0.0303061	0	-0.0244796	0.0214869					-0.0121799		-0.0320572	-0.0573953	0.0720555	-0.0546265		-0.0718703																-0.130185		0.0639465	0.0630303	0.0437923	0.0483863
Effect_size	msp_1005	0.048437	0.17419		0.0598739	0.112712		0.0504228	0.211197	-0.169743	0.0787763		-0.0581765		0.0875134	-0.0451626	0.0578195	-0.0630143	-0.169168	0.0490999		-0.141486			-0.315908	0.045138			0.00387459		-0.0285863	-0.303211	-0.0333219	-0.0875064	-0.0312529	0.238868	-0.0953572	-0.0529035	0.0494018
Effect_size	msp_1006	-0.145107	-0.00727583	0.0763024	0.0334866	-0.047066	0.057186	0.0462141	0.0680032	0.132661	-0.0829739	0.0171932	0.0598512	0.126508	0.0634071	0.35204	0.00525935	0.0980153	0	-0.0116596		0.0868227	0.123821			0.0281932	0.0916399	-0.0605516	-0.0106712	1	0.325863		-0.0163728	0.204309	1	0.0811072		0.0743083	0.0181383
Effect_size	msp_1007								0.103953	0.00115542																											-0.181228
Effect_size	msp_1008		0.0213072		-0.016852		0.100525	0.0481309	0.0240216	0.00202352	-0.00683032	-0.104986	-0.0166919	0.0807343		0.00288432	0.127781										0.118333						0.0303619	-0.0275026			0.00898169	0.160619
Effect_size	msp_1009	0.0964395	0.00685332	-0.00557579	0.0588027	-0.0430059	-0.0112367	-0.0440111	-0.0299648	-0.075843	0.12716	0.0742002	0.132087	-0.257306	-0.136425	-0.025904	0.0572523	-0.0858883	0.151173	-0.048355		0.029117	-0.077757			0.00399981	-0.0191902	0.0355162	0.00146854	-0.0814397	-0.138094		0.00487082	0.0672382	-0.0613668	-0.0683108	0.0582076	-0.0511313	0.022319	0.00369658
Effect_size	msp_1010									0.00115542						0.112756				0.0348928	-0.166753	0.063272								0.0898098				0.0126918				0.100578
Effect_size	msp_1011		0.037653												-0.0966452			0.049931				0.0228481												0.0291159			-0.212879		0.098465
Effect_size	msp_1012	0.148518	-0.0927843	-0.0312189	-0.0230892	0.199992	0.106934	0.103131	0.160144	0.124346	0.090457	-0.0277458	0.138196	0.13792	0.25876	0.190529	0.0268258	-0.0577451	0.0647845	0.069251	-0.108424	-0.167516	-0.0919098	-0.09759	-0.424212	0.0735422	0.00161459	-0.066902	0.0206796	-0.0642087	-0.172065	-0.116174	-0.241481	-0.0947541	0.00825782	0.0116934	0.00117872	0.212902	0.422131
Effect_size	msp_1013	0.09947	0.140345	-0.116321	0.0281791	0.129179	0.217619	0.0893822	0.147032	-0.00126876	0.0432536	-0.0593396	0.0903427	0.206209	-0.127502	0.120408	0.0725277	0.0831944	0.0720234	0.0241378	0.0226705	0.016641		0.434099	0.218706	-0.0273173	0.0920662	-0.0270569	-0.0642995	-0.0801258	-0.0520625	0.0949951	-0.154292	0.0211039	0.0967879	-0.0821058	0.0498287	0.227261	-0.0342785
Effect_size	msp_1014											0.0211468																									-0.0470737	0.24014
Effect_size	msp_1016	0.0776119	0.0355083	0.0530094		-0.0105375	0.0812918	0.00205699	-0.0180667	-0.0481668	-0.00683032		0.0368502		-0.0542532	-0.0180464		0.0178552		0.0449113		-0.046016					0.0348518		0.0121033					-0.0288864	-0.0226163		-0.0613439		-0.0432037
Effect_size	msp_1017		0.0393265	0			0.0514982	0.0829703	0.219557	0.16468	-0.0089319	0.00514712	0.0373301	0.167317	-0.0936012			0.170619			-0.166753	0.00901149			0.0546541							-0.0780559	0.0405184		0.042569		0.077194		0.0272575
Effect_size	msp_1018		0.0857268		0.0335192	-0.0658495		0.0268498				0.0417797			-0.0542532													0.0084354		0.0802339							-0.00376418
Effect_size	msp_1019	-0.0127699	0.0850902	0.0802764	0.00646323	-0.0676536	0.0844739	0.0730231	0.03984	-0.0451721	-0.0616132	-0.0297444	0.00169227	0.0422024		0.00719592	0.0467182	0.10313		0.00692087		-0.0315028	-0.0742476			-0.052913	-0.130711	-0.0906348	-0.029711	-0.175363			-0.0235449	0.0171289	-0.0189667		-0.104833	-0.0220223	0.151306
Effect_size	msp_1020		0.0874214					-0.024145	0.195715	0.00115542	-0.00683032											0.00500638					0.123441			0.000352103					-0.0171938		-0.0176646		0.073621
Effect_size	msp_1021	-0.0357996	0.116709	-0.0143112	0.0336445	-0.0582251	-0.0754197	-0.0414406	-0.00607822	-0.138893	0.00110174	0.0700769	-0.0564523	-0.330891	0.095112	-0.108001	0.0552122	-0.18669	0.00928186	-0.113297	-0.103615	-0.0386014	-0.146739		-0.122861	0.038771	0.119889	-0.00769843	0.100719	-0.154981	-0.239982	-0.13769	-0.0515943	-0.217556	-0.114021	-0.138048	-0.0714079	-0.0731825	0.0782015
Effect_size	msp_1022	0.0547215	0.0398995		-0.0242076	0.0459945	-0.0228611	0.0529196	-0.15356	-0.082671	0.00176095	0.0101673	-0.040829	-0.196494	-0.061532	-0.0429422	0.0896024	-0.0977771		-0.0573989	0.0487108	-0.0825274			0.0546541	0.0640297	0.118037	-0.0539333	0.015792	-0.0492922		-0.0394003	-0.0750973	-0.0999229	0.00589061	-0.0571649	0.000356723	-0.0567091	0.059625
Effect_size	msp_1023									0.00451842																											0.00947267		0.0292044
Effect_size	msp_1024			0					0.103953	0.00231084																							-0.0249719
Effect_size	msp_1025				0.0335192
Effect_size	msp_1026							-0.0225353		0.00231084				-0.00411822									0.0702899												0.0142001		-0.0637683		0.149916
Effect_size	msp_1027	-0.0657285	0			0.10463		-0.114465		-0.0287367	0.0429425		0.00526649	-0.133148	0.019688			-0.0748964		0.035021		-0.0681924				0.137045							0.0303619		0.0299231	0.0192014	-0.194416		0.001693
Effect_size	msp_1028c						1					0.169897																		0.27888
Effect_size	msp_1029									0.0463541																											-0.106133		0.073621
Effect_size	msp_1030			0.0802764				0.0490117	-0.00946352	0.00633994			0.0524951	-0.0607715	-0.00380493	-0.0105468		0.0233043			-0.166753										-0.0342503	-0.189445	-0.0722121		0.0424864	0.0840264	0.10339	0.124935	-0.0390227
Effect_size	msp_1031		0.158833		0.103038			0.0490117		-0.0166701		0.0744943	0.0200197	-0.0590834	-0.0053269	0.0392646		0.117635			0.0291477	0.148513			0		0.0840135		0.051887			-0.074053		-0.0429871			0.0786505	0.0623446	0.0054761
Effect_size	msp_1032	0.152274	-0.100302	0.112792	0.0579773	0.0489174	-0.0234207	-0.0807783	-0.0624988	0.0390195	0.152261	-0.00854831	0.0150565	-0.279332	-0.131664	0.0265003		-0.0287131	-0.0771483	-0.108819	0.201681	-0.127599			0.178028	-0.0351862	0.0737544	-0.0322231	0.0165885	-0.0495687	-0.139547	0.0692781	0.100531	-0.0326767	0.0208673	-0.167005	-0.0238958	-0.0673503	0.0772456
Effect_size	msp_1033	-0.0156367	0.0540988	0.0543382	-0.0264024	0.078477	0.0813891	-0.113421	-0.106471	-0.169468	0.221941	-2.03955e-05	0.0620137	-0.0927733	-0.166235	-0.0433877	0.0684149	-0.0808131	0.114231	0.00528141	0.172269	-0.114904		0.0578799	0.0893077		0.00319612	0.00351964			-0.137671	-0.041816	-0.00425566	-0.097717	-0.0222653	0.27342	-0.074938	0.0382224	0.0107626
Effect_size	msp_1034	0.0775907		0.133998	0.0661828		0.160009				0.0448096	0.0915502	0.0538682							0.10142			0.291515				0.0280761		-0.0113283	1	0.427294			0.140507	0.267339
Effect_size	msp_1035						0.0392591													0.00826361															0.0520735
Effect_size	msp_1036																			-0.025511								-0.0207269		0.000111411					0.00946846		-0.00993299
Effect_size	msp_1037	0.0735271	0.0530698			0.169577		-0.233306		-0.139019			-0.00173305	-0.134168	-0.135742			-0.208046	0.0145065	-0.0126515		-0.224572			0		0.00823549	0.0429491			-0.0895256			0.0398814	0.0253361	-0.0384443	-0.135341		0.0960282
Effect_size	msp_1038	0.0941019	0.0807741	-0.0696063	-0.0595144	-0.0315848		-0.136545	-0.113335	0.00451735	0.0868905	-0.0974453	-0.0987444	-0.387661	-0.273744	-0.0706879	0	-0.043881	-0.0517565	-0.0642571	-0.151566	-0.0917025			-0.26034	0.0193655	0.078695	0.0106869	-0.020895	-0.078919	-0.209699	-0.176365	0.0804552	-0.0250859	-0.0558535	0.0424565	-0.127797	-0.103416	-0.160638
Effect_size	msp_1039	-0.028586	-0.0770806	-0.00361997	0.0808324	0.222847	0.0365799	-0.0823821		-0.059103	-0.0146081	-0.0159359	0.190726	0.105508	-0.038858	0.0893302		-0.117893	0.0158595	0.000184367		-0.107712				0.0241782	-0.00173394	0.0228062		0.0944806	0.00601465		0.0226494	-0.00525681	0.0848034		-0.00296401	0.110079	-0.0115206
Effect_size	msp_1040c																	0.00882076
Effect_size	msp_1041				0.0344013		0.0710473					-0.0202802	0.0236872			0.23283				0.0667573														0.0737395	0.0592304		0.0451914	0.20604
Effect_size	msp_1042		-0.00820789			-0.121273	-0.0614844	0.0310876	-0.0883592	-0.0711521		-0.0518928	-0.0765197		-0.0981672	-0.060396	0.05959	0.123617		-0.0170655							-0.0154311	-0.0454558	-0.0624051	-0.0864767				-0.0479776	-0.0414106		-0.0766719	-0.0444382	-0.0661679
Effect_size	msp_1043	0	0.0289297			0.0738718	0.0125612	-0.143833	0.0249155	-0.0135514	-0.0435346	0.00498875	0.0488397		-0.085229		0.122721	-0.128769	0.0145065	0.0171782	-0.0245728	-0.0945249				-0.00371941	0.0117297	-0.0372681	-0.0447454			-0.074053	-0.030246		-0.0367399		-0.134596	-0.0173902	0.128295
Effect_size	msp_1044		0.0213072		0.0879804		0.019935					0.0701577	0.158241			0.0372603	0.0414202			0.0561703							-0.0181154	-0.0173213			0.0330787			0.00112401	-0.0122791			0.0290162
Effect_size	msp_1045		0.0314502					0.0277919	0.103953	0.104631	-0.00455355				0.036909														0.0992905				0.163533		0.0507551				0.149916
Effect_size	msp_1046				-0.00279536	0.0214869						-0.0110497	0.0791238			0.220656				0.0749552			0.202175				0.177093		-0.00603355	0.216117	0.141108			0.0521486	0.105372			0.0852407
Effect_size	msp_1047	0.0750232	0.0254914			0.118203	0.0494176	-0.0360073		-0.00865004	0.0429425	-0.0740711		-0.232739	-0.225894	-0.0227057	0.104443	-0.202369		-0.00559188		-0.251763					-0.0251527	-0.0244242	0.0276142				0.140282	-0.0612012	0.00341058	-0.0487476	-0.165638	-0.0319566	-0.0769948
Effect_size	msp_1048	0.032206		0.136616	0.0164472	-0.0676536	0.0710473		0.0249155	-0.0186916	0.0621994	0.0510198	0.11124			0.0675723		-0.0434357		0.0348928		0.055805	0.0924096			0.137435		0.0602789			0.00601465			0.109279			0.039552	0.0589129	-0.0730146
Effect_size	msp_1049	-0.0490409	-0.0610427	0	-0.0247516	0.1109	-0.0470273	-0.0806969	-0.0671581	-0.0708952	-0.0089319		0.0256505	-0.18872	-0.13954		0.030489	-0.143741		-0.0580408	-0.0504878	-0.151299					-0.0465559	-0.0612783	-0.0470498	-0.087264		-0.140339	-0.0235449	-0.0652665	-0.0681904		-0.101386	-0.0333026	-0.0493847
Effect_size	msp_1050								0.195715									-0.0434357				-0.0483168									0.0128377						-0.0893182
Effect_size	msp_1051	0.0796325	-0.0241393	0.0147157	0.0459273	0.0819055	0.0119373	-0.123548	-0.0304014	0.083471	-0.105035	-0.0100237	0.0969319	-0.136917	-0.110406	-0.0171028	0.0760756	0.0585468	0	-0.0735222		-0.0506176	-0.0736347			-0.0139057	-0.0662334	-0.0382942	-0.114653	-0.123346			-0.0488378	-0.00473765	0.0184509		-0.105039	-0.0266871	0.0541466
Effect_size	msp_1052				0.0598739					0.00115542			0.0756999							-0.0534806								0.0144995							-0.0447511		0.118084		0.147969
Effect_size	msp_1053				0.0382032			0.163508	0.0383366	0.0669348	-0.0496022	-0.0564235		-0.00411822	0.0481279	0.0553961		-0.0112901															-0.113444	-0.0300196			0.0443408	0.0419301
Effect_size	msp_1054	0.126128	0.109137		0.0389021	0.018959	0.0191743	-0.0248701		0.00686827		-0.0923871	0.00432163				0.0416357	-0.118982		-0.0468085		-0.120611				-0.00932231	0.013912	-0.0148162	0.00173381	-0.0326009	-0.0314776				0.0615082		-0.087231	-0.025611	-0.0459911
Effect_size	msp_1055												0.00668987							0.035021		-0.0483168													0.0299231		-0.0963984
Effect_size	msp_1056		-0.000911988					-0.0761085		-0.0309472								0.0157546																			0.0207889
Effect_size	msp_1057c	0.0750232	-0.00455994		-0.0454246	0.0315717	-0.0299236	-0.0740516	0.0886129	-0.0556468		-0.00964297	0.1213		0.0308744	0.254409		0.0661013		0.0821684		0.00901149	-0.015536				0.018636			-0.0491491				0.0878941	0.0831174				-0.0243273
Effect_size	msp_1058c																			0.0741963			0.258761							0.0328654					0.0426516		0.0207889
Effect_size	msp_1059c																			0.128561			0.15599					0.0602789							0.1431				0.0311514
Effect_size	msp_1060c	0.175447	0.146867	-0.0295102	-0.0649998	0.336395	0.188621	0.251888	0.083767	0.071483	0.0972064	-0.0326227	0.103788	0.376446	0.375143	0.102322	0.0553482	0.0266468	0.177569	-0.0251023	-0.0535319	-0.15567	-0.129653	-0.321412	0	0.00178271	-0.015268	0.144255	-0.104416	-0.163141	-0.184966	-0.0460368	-0.23372	-0.177086	-0.084539	0.123409	-0.0172765	0.19029	0.287653
Effect_size	msp_1061c					0.018959			0.195715	0.0454081						0.0498819												0.0602789	0.0716928					0.0126918	0.0300397		-0.0975128		0.149916
Effect_size	msp_1062	0.0222724	0	0.192808	0.0257267	0.0644585	-0.157987	-0.14256	-0.015988	-0.207096	0.088422	-0.0299912	-0.0324594	-0.174898	-0.137447	-0.0812213	0.0165731	-0.235463	0.0676366	-0.111481	0.0219931	-0.0258993	-0.12908		-0.0607516	0.0945511	0.0507503	-0.0240725	0.0988242	-0.178124	-0.137701	-0.0716031	0.0200628	-0.130931	-0.179175	0.0432552	-0.0862519	-0.0375527	0.0554396
Effect_size	msp_1063c						0.0516752			0.0780454
Effect_size	msp_1064	-0.028586				-0.0311033																															-0.0105173
Effect_size	msp_1065		0.0334793					0.00102849	0.198116	0.0788669				-0.0590834																							-0.115499	0.0846799	0.073621
Effect_size	msp_1066		0.0817725			0.0349404	0.0297646	-0.0599283		0.089548	0.0466766	-0.0378511			-0.110099		0.0831177	-0.137967		0.0202598	-0.166753	-0.066284				0.0184231	0.0140358	-0.0295797		-0.0190762		-0.195656	-0.0150156		-0.0444531		-0.0271184		0.0292044
Effect_size	msp_1067											-0.0202802																						-0.00787568			-0.132166	0.194322
Effect_size	msp_1068		0.0850902			0.128993		0.0171439	0.195715	0.0444621	-0.00683032				-0.0032018			0.0225295		0.0188639		-0.0871111						0.0418139					0.064927			0.13859	-0.0787097		0.0712461
Effect_size	msp_1069	-0.029513	0.121356	0.14187		-0.165277	-0.0643018	-0.0659391		0.0752679	-0.0597461	-0.0520346		-0.167812	-0.0959462	-0.0409167	-0.0171349	-0.194614		-0.00556081	-0.00244368	-0.257055			-0.0364509		-0.0304749	-0.0283849	-0.0363053	-0.0940617		-0.109355	0.156648	-0.0397793	-0.0147314		-0.0826179	-0.051508	0.342091
Effect_size	msp_1070	0.0199146		0.0084466	-0.0294868	0.285022	-0.00571832	-0.0405103		0.00404704	-0.135677	-0.127512	0.134335	0.149776	0.0585521	0.0911092				-0.0106426			0.0420855				0.0743913	0.0719955	-0.00654442	0.119899	0.0989173			0.0238126	0.064023				0.001693
Effect_size	msp_1071							0.0197814	0.103953	0.0463541					-0.00106727																						0.00236812		0.0712461
Effect_size	msp_1072	-0.028586			0.039368	0.0297676	0.100832	0.158018	-0.00946352	0.125737	0.0648746	0.0220814		0.0682728	-0.0542532	-0.00384389		0.164501				-0.0279025									-0.0720702			0.0166511	0.0143907		-0.119619	0.134176	0.248508
Effect_size	msp_1073												-0.00119981			0.0113021																						0.00423808
Effect_size	msp_1074		-0.065944	0.14187				-0.116889	0.12854	-0.11669					-0.0936012					0.0737087								0.0418139					-0.0263989				-0.175776		0.176692
Effect_size	msp_1075									0.00231084																											0.0443622
Effect_size	msp_1076		0.0563648	0.0249321	0.0700053	-0.0290298	-0.00336545	0.0350244	0.0135256	0.0188117	-0.000814718	-0.0511181	0.133833	0.101164	0.123655			0.0115534		0.00899119	0.128327		-0.0123926	0.170103		0.0580056	-0.014659	0.00743181	0.0667025	-0.0452119	-0.0332623	0.0219147	-0.0423595		-0.0527905		0.0133817	-0.0224173	0.0340214	0.0998591
Effect_size	msp_1077				-0.0375714		-0.0210192					0.0133867	0.0136659				0.0715175			0.0136321						-0.0107172	0.0231759	-0.0356972	-0.0379592	-0.0367788					0.00583606		-0.152238
Effect_size	msp_1078	0.077572	0.09705	0.109827	-0.051847	0.170336	0.0476995	0.158767	-0.0919495	0.0901652	0.0175597	0.0495688	0.066052	0.13471	0.258403	0.0708643	0.108257	0.103973	-0.00418638	0.034109	0.0208179	-0.0616325			-0.163962	-0.0122787	0.0234803	0.0116576	0.0152759	-0.076558	0.000326928	-0.0443596	-0.196758	-0.0990172	-0.0444558	0.132369	-0.0284804	0.070272	0.204306
Effect_size	msp_1079	0.0199146			0.0593345			0.0268498	0.145174	0.0630663					-0.0577534											0.228242	0.0591939		0.163399								-0.0971413	0.152237	0.0272575
Effect_size	msp_1081						0.110337	0.164988	0.0552324	0.167711	0.0429425	0.0995869	0.092397		0.120979					0		0.00700965	0.0462617		0		0.0207706			0.0755261		-0.189445	-0.0170177		0.0419528		-0.0143037
Effect_size	msp_1082									0.00287536	-0.00455355									0.01168								0.00884192		0.000528155			-0.0170177		-0.0171938		-0.0180043
Effect_size	msp_1083						-0.00641602										0.045366			0.0743407						0.0346613				3.12509e-05					0.048429
Effect_size	msp_1084			-0.0350297	0.0637226	0.0364272	0.100832	0.0184046	-0.0458536	0.00812811	0.059601	0.00647748	0.0425358	0.0655944	-0.131232	0.0119214		0.119735		0.0188639		0.113144						0.0851498	0.051887		0.0118868		-0.0252506	0.009913	0.100474		-0.0425342	0.00423808	-0.0717977
Effect_size	msp_1085	0.166009	0.163504	-0.0382215	-0.00289039	0.202952	0.0688738	0.194401	0.166955	0.0683048	0.0349657	-0.0873263		0.0943598	0.0733087	-0.00169081		-0.0447471		0.0322966		-0.153752	0.0176289				0.0244152						-0.141374	-0.0758604	-0.0313053		-0.0371829	0.0545514	0.220748
Effect_size	msp_1086	-0.0710578	-0.115297			-0.0676536		-0.112281	-0.0883592	-0.0541388		0.0292328	-0.0222077	-0.209538	-0.10906		0.0466163	-0.104184		-0.0183759	-0.166753	-0.111629			0.109308			0.0120167				-0.0112885				0.0356597	-0.141879		-0.115581
Effect_size	msp_1087		0.0446526		0.0335192			-0.111639	0.103953	0.0454081		0.0557034	0.0785945	-0.13183	0.0746773							-0.0506176					0.00103745	0.023991	0.0401573				0.0287207				0.0141767		0.073621
Effect_size	msp_1088						0.0310686	0.0171439				0.0250957	0.0373301	-0.00617733	-0.0032018		0.0163718			-0.0148679			0.0634266			0.0466672	-0.0439161	0.034056		-0.0522196					-0.00363032
Effect_size	msp_1089	-0.100906	0.00264061	-0.137564	-0.0648767	-0.0858122	0.0088786	-0.0407101	-0.18849	-0.0619143	0.0868288	-0.0400364	0.000549775	-0.113844	-0.24929	0.225806		0.043465	-0.0528172	0.0621189	-0.0340459	-0.0581422	0.0598671		-0.163962		0.115953		-0.0177456	0.0576771	0.157394	-0.100943	-0.0123573	0.107954	0.0133411	0.225055	-0.0625874	0.192548	-0.119277
Effect_size	msp_1090	0.190444	-0.0426501	0.0263272	-0.0328377	0.230879	0.149848	0.147055	0.0754464	-0.0608906	0.168143	-0.0426182	0.0912332	0.131428	0.119621	0.0509297	0.0244745	-0.117853	0.0517172	-0.0225974	-0.0384162	-0.141251			-0.133962		-0.00487108	0.0334468			-0.104064	-0.123697	-0.0615704	-0.046407	-0.0429159		-0.0868165	0.0694835	0.0734026
Effect_size	msp_1091				0.0348437		0.0885198					0.0555359	0.076007			0.0380406	0.0162643			0.0492897			-0.0200435			0.0429943		-0.00551643	-0.0121837	-0.0369661				0.0405198	0.142065		-0.0105173
Effect_size	msp_1092						0.0470084					0.0481454								0.00610389			0.00955253				-0.0447263	0.0297981	-0.0341513	0.0273905				0.0291159	0.060043
Effect_size	msp_1093	0.155478	0.0887702	-0.0140557	0.0569668	0.133331	-0.0511403	-0.096032	-0.0718462	-0.103183	0.0121854	0.0336634	-0.0382024	-0.212603	-0.0703493	-0.08285	0.17626	-0.200676		-0.0794048	-0.0969764	-0.178185	-0.0964504		-0.0121503	-0.0425392	-0.036094	-0.107652	-0.080873	-0.0901722	-0.0767786	-0.134654	-0.0287258	-0.104571	-0.0605438	-0.0700904	-0.028671	-0.0323892	0.0110919
Effect_size	msp_1094	-0.0255921	-0.000434504	0.0530094	0.0336823	0.0227771	-0.00964795	-0.118121	-0.0470195	0.0368865	-0.00683032	-0.00689456	0.104479	-0.339188	-0.0970214	-0.0665845	-0.0333092	-0.0662319	0.273689	-0.00139098		0.0497492	-0.0766156			-0.00375773	-0.00118225	-0.0447225	-0.0616374	-0.0384301	-0.117335	-0.092531	0.192751	-0.0989025	-0.0216679	0.0661465	-0.0407604	-0.0863172	0.0355253
Effect_size	msp_1095									-0.0698301												-0.046016															-0.149383		0.0729818
Effect_size	msp_1096					0.0214869			0.101025	0.00115542								-0.0434357				0.00500638															-0.0877429	0.127587	0.0712461
Effect_size	msp_1097				0.0598739			0.179798	0.0584027	0.100183	-0.0597461	0.00380054		0.16513	-0.00106727	0.0680747																					0.0537266	0.12145	0.0766654
Effect_size	msp_1098	-0.0461131	-0.0603934	0.242819		0.0461411	0.019935	-0.0854394	0.0610718	-0.012687	-0.0089319		0.00741227	-0.228743	-0.148409	-0.0138135		-0.146628		0.0122891		-0.136423					0.0972707			-0.0262195			-0.0263989	-0.0526111	-0.0283311	-0.0630154	-0.0806846		0.227297
Effect_size	msp_1099c
Effect_size	msp_1100	-0.0252724	-0.037206	0.0386286	0.0128401	-0.0787118	0.037428	-0.103647	0.0610393	-0.186278	0.063548	0.00956926	0.037612	-0.205561	0.00846267		0.112692	-0.231301	0	-0.0361249	0.0601722	-0.211116			0	0.00942282	-0.0190209	-0.0175085		-0.0136034	-0.106716	0.0102268	0	0.0186809	-0.0200588	0.0673644	0.0464838	-0.0279784	0.236579
Effect_size	msp_1101							0.0806969	0.207904	0.0535101	0.0811991	-0.051751	0.0276166	-0.0514135													0.0593812										-0.0652232	0.0725752	0.151306
Effect_size	msp_1102		-0.00820789						0.0281993				-0.0264148	-0.0514135	0.0320395			-0.24401				-0.160753												-0.0524548	0.0143907	-0.0174828	-0.175481	0.0521507	0
Effect_size	msp_1103	0.0199146		0		0.0214869	0.139859		0.00375312	-0.0206649	-0.0616132					-0.00876783		-0.0580568				-0.120611							0.051887					-0.01798	0.0648836		0.00947267	0.0221942	0.0439006
Effect_size	msp_1104
Effect_size	msp_1105																																				-0.0742134
Effect_size	msp_1106
Effect_size	msp_1107				0.0335192	0.018959			0.195715	0.0454081								0.011761				0.00700965															0.0464707
Effect_size	msp_1108		-0.00273596					-0.120327					0.0785945	-0.0968812	-0.0416935			0.011761																		0.234299	0.0206657
Effect_size	msp_1109	-0.0326698							0.00562967		-0.100687							-0.0193545		0.0740338		-0.120611					0.0413211										-0.00590929		-0.0243273
Effect_size	msp_1110	-0.0143661						-0.140671		0.00674506			-0.00817996				0.107376	-0.0967723		0.0369763		-0.149471			-0.0326077							-0.195656			0.00367473		-0.099497
Effect_size	msp_1111	0.141811	0.00622874	0.0341539		0.258398		0.122102		0.0603579	-0.010701		-0.0014283		-0.075815			-0.0591288			-0.310651	-0.201564				0.0252535	0.105026		-0.0132718			-0.0252197	0.191508	-0.0604717		0.560387	-0.00230362	0.101052	0.0372524
Effect_size	msp_1112		-0.101749																																0.0592304		-0.0776841		0.073621
Effect_size	msp_1113c					0.018959
Effect_size	msp_1114	0.160925	0.0440035	0.00615184	0.088481	0.196196	0.0133389	0.0170329	-0.0224538	0.0795576	0.157351	0.103341	0.121191	-0.175035	-0.13028	0.00653677	0.0605725	-0.165187	0.127304	-0.0165953		-0.056981	-0.0467505			0.0242076	0.0115838	-0.0162823	0.00204967	-0.0740163	0.0504647		0.314005	0.191856	-0.00385096	0.127374	0.0549039	-0.0816147	-0.00954139	0.0300221
Effect_size	msp_1115		0.0476938					-0.0386261	0.109779	0.000674506			0.0435425	-0.099817	-0.00187971			0.0699797				0.107137							0.0235583								-0.0922503
Effect_size	msp_1116	0.0174253				0.166168		0.0515688	0.147263	0.0375787		0.0249539	0.0791238									0.00700965														0.234299	0.0128517		0.0292044
Effect_size	msp_1117																										0.041015								0.0142001		-0.0416848
Effect_size	msp_1118				0.112907								0.118226			0.107044		0.108315				0.094968												-0.0248684		0.348347		0.00339046
Effect_size	msp_1120	-0.0307106	0.152585	0.0744381	0.11078	-0.0305441	0.0148514	0.0633072	-0.0640685	0.0672274	-0.0089319	0.0708053	0.100994	-0.115703	-0.0367856	-0.0756345	0.0198659	0.0642126	0.00528651	-0.052655		0.00901149				0.00862273	0.0161496		-0.0309373	0.0311862	0.0582201		0.116466	0.0137932	-0.0111138		0.0613994	-0.0137837	-0.03896
Effect_size	msp_1121
Effect_size	msp_1122	0.0257584	-0.0485567			0.153512		-0.16964		-0.100152			0.0122076	-0.141912	-0.180586	-0.0108009	0.265719	0.0645148	0	0.035021		0.0156904					0.0593812										-0.095964		0
Effect_size	msp_1123	0.0199146				0.0214869		0.0184626					0.153971	-0.00411822	0.0463778	-0.00384389												0.0419688			0.0217892			0.0166511			0.0443622	0.16621
Effect_size	msp_1124		0.236888			0.018959		-0.0540667		0.1119			0.158508	-0.101886		0.0384307		0.00882076				0.00420579										-0.135236		0.00112401			0.0102542
Effect_size	msp_1125	0.0758719	0.0531254	0	0.0593345	0.0766962	0.0330577	-0.0212225	-0.0844816	-0.113359	0.186841	0.0638026	0.234411	-0.040579	-0.0315987	-0.0318926		0.010497		-0.00992634		-0.0276549					0.0198123				-0.0110066		0.0676846	-0.07424	-0.0163988	0.087484	0.0264684		0.0169878
Effect_size	msp_1126		-0.0256436		0.0684556		0.000402694	0.054263	-0.0805628	-0.0905588	-0.00936335	0.0416306	-0.0570557	-0.00513764	0.036909	-0.0585729	0.0629409	0.101613		0.00976991	-0.166753	0.0917515			0.0546541	0.0146914	0.0579069	-0.0238713	-0.0538841	-0.0368567	-0.0707478	-0.0107111	0.1093	0.0100342	0.0184171	0.13859	0.0796232	-0.0700217	-0.01267
Effect_size	msp_1127	-0.0642201	-0.144212	-0.183666	0.0334449	-0.0475614	0.229592	0.0278892	0.181179	0.278683	0.190267	0.137749	0.242016	-0.321416	-0.258893	0.293972	0.0757765	0.125042	0.173615	0.138794		0.188257	0.127963			-0.0316418	0.16676	-0.0744492		1	0.379431		0.117903	0.202791	1	0.225418	0.0451914	-0.0304993	0.110067	0.096571
Effect_size	msp_1128	0.0785735	-0.204633	-0.0379489	0.00722236	0.218148	-0.0671088	-0.156788	-0.0549505	-0.015341	-0.105559	0.0474665	0.0556925	-0.332898	-0.321059	0.0526403	-0.0350307	-0.136653	0.0267099	-0.102621	0.0333356	-0.00328155	-0.105656		0.0546541	0.0569338	0.0589302	0.0103212	-0.0124945	-0.0731778		-0.140339	-0.0685555	-0.0297013	-0.128733	-0.00521848	0.110297	-0.0691053	0.0636614
Effect_size	msp_1129	0.248244	-0.0256436		0.0593345	0.018959	0.016957	0.00102849					0.112366		-0.00380493							0.063272					0.0413145	0.00833377	0.0169681					0.0287941	0.00482755		-0.0420599
Effect_size	msp_1130
Effect_size	msp_1131		0.190024			0.018959		-0.00748093		0.131619		0.00357698		0.0127545	0.043173				0.114231												0.097154
Effect_size	msp_1132	0.114948	0.122246	0.195583	-0.0362794	0.0763342	0.175433	0.0729104	0.0875091	0.0214366	0.243398	-0.0418519	-0.084447	0.0538107	0.116985	-0.043107		0.119572		0.0332668	-0.0945563	-0.0768002					0.00813506				-0.129612	-0.34702	-0.0170177	-0.0786917	0.0050031		-0.0345032	-0.0118299	0.117183
Effect_size	msp_1133					0.0214869		0.0184626	0.0600352	0.00451842								-0.066722				-0.122411															-0.0815572
Effect_size	msp_1134	-0.0989668				-0.0988905	0.0730287		-0.03984	-0.117179	0.0466766	0.0231697						-0.0537496				-0.0535033													0.0412025	0.14236	-0.0228396		0.0428011
Effect_size	msp_1135		0.0213072									0.00357698			0.0844694	-0.00902197		-0.0207747				-0.0279025												-0.0465687			-0.0827481	0.0190714	0.0311514
Effect_size	msp_1136					0.0798319
Effect_size	msp_1137							-0.0791255	0.103953	0.00115542		0.0383286						-0.0458488				0.0130166
Effect_size	msp_1138	-0.028586	-0.0303061			0.0761943	0.00379686							-0.0590834	0.0955359	0.0276385	0.189583	-0.0459233		0.0141128		-0.0137636				0.104111	-0.00555599	0.0250318	0.00387459						-0.0311481	0.328764	-0.0519312
Effect_size	msp_1139	-0.0464801	-0.049646	0.057087	0.0644078	-0.0466559	-0.0559004	-0.156605	-0.0857604	-0.085309	0.115252	0.00673658	-0.0521302	-0.217737	-0.174055	-0.0027213	0.0505143	-0.0337281	0	0.00193428	0.107375	-0.148897			0.218706	-0.042513	-0.0024645	-0.033117	-0.0707698	-0.0300527				-0.0143895	0.0407185	0.0156554	-0.106036		-0.0580863
Effect_size	msp_1140	-0.028586	0.0915641			0.122663		0.0219439	0.0576338	0.129397	-0.00730792	0.0295982		-0.0121338	-0.0396125	0.0685771		-0.0193545		-0.0504528		-0.126011					0.019516						-0.022118		0.014189		-0.0430051		0.0292044
Effect_size	msp_1141					0.018959							0.0534355					0.00882076		0.00799118								0.0299266			0.0992172			0.0287941			-0.134056
Effect_size	msp_1142	0.104928				0.0304799			0.0701676	-0.0574767			0.0623439					-0.143842				-0.106811														0.0529055	0.0213777		-0.0875562
Effect_size	msp_1143	0.00435644	0.056787	0.0373177	0.00677501	0.158812	-0.161003	-0.130555	-0.100991	-0.321389	0.0350677	-0.0280796	-0.086546	-0.24915	0.236326	-0.14009	0.0449496	-0.261812	-0.264025	-0.116874	0.216444	-0.125176	-0.256042	-0.418214	-0.0694304	0.0718029	0.00849319	0.0933683	0.146667	-0.178524	-0.0490767	0.0821989	0.124292	-0.202066	-0.23965	-0.096053	0.0127132	-0.108378	-0.0763161
Effect_size	msp_1144c
Effect_size	msp_1145												0.092061			0.167792																						0.229139
Effect_size	msp_1146												0.0631979																								0.0207889	0.157497
Effect_size	msp_1147								0.0552324						0.0481279																0.0330787						0.0435734		0.0272575
Effect_size	msp_1148																																				0.0447768
Effect_size	msp_1149					0.115028	0.0514982					-0.0199148	0.189774														0.0413211		0.0522436		0.173479		0.0303619	0.0745883	0.0143907			0.0347085
Effect_size	msp_1150		0.0850902					0.0504228		0.0383155											-0.166753	-0.046016															0.00204786		0.0292044
Effect_size	msp_1151				0.0637226		0.173702			0.00287536		0.0383286																	0.0520653						0.042569		-0.0465958
Effect_size	msp_1152																																	0.0126918
Effect_size	msp_1153		0.024088					-0.109129		0.103894				-0.138747	0.0699948																						-0.0470737
Effect_size	msp_1154									0.0444621																													0.0712461
Effect_size	msp_1155		-0.126347					-0.182767		-0.118713			-0.030766			-0.0168669		-0.0434357				-0.046016									-0.0282026		-0.0738533	-0.0576947			-0.0951824	-0.0258262	0.0207295	0.101199
Effect_size	msp_1156	0.148313	-0.0846839	-0.303624	0.134155	0.207275	0.246364	0.242096	0.280906	0.300437	0.311593	0.255784	0.303378	-0.432951	-0.407748	0.105553	0.0136815	0.267001	0.00528651	0.038836	-0.301775	0.111385	0.12934		0.0893077		0.153589	-0.146358		-0.047743	-0.0796081	-0.100807	-0.277728	0.197683	1	-0.044105	0.00679696	-0.0840324	-0.00528499
Effect_size	msp_1157	0.0174253						-0.118035		0.00231084			0.0769283	-0.0983491	-0.0966452					0.0161111						0.0329668	-0.0150154		-0.00594735						-0.024473		-0.0166455
Effect_size	msp_1158						0.143009		0.394642	0.241492	0.194921	0.0484621	0.0594595			-0.00437409		0.156754	0	0.0269071					0		0.167564					-0.189445	-0.070571	-0.042648	0.0417652		0.0451914	0.0270128
Effect_size	msp_1159	0.0708039	0.0429405	0.00361997	0.00376854	0.0726068	0.0579601	-0.0176657	0.0428468	0.184062	0.0767563	-0.00900378	0.0437942	-0.0064114	-0.188812		0.0200632	-0.0434357	0.0158595	-0.0229736	-0.126307	0.055805	0.0411681		-0.191289	0.00987968	-0.0399535	0.073788			0.00303455	-0.0204159	0.164811		0.13845		0.0474158	0.00339046	-0.00304228
Effect_size	msp_1160		0.0802549			0.018959		-0.00102849		-0.127557		0.00357698		-0.0590834	-0.00228296			-0.172577				-0.0821532														0.533415	-0.107405		0.053604
Effect_size	msp_1161															0.0269252																		-0.0087888
Effect_size	msp_1162	-0.100563	-0.0100319			-0.0988905		-0.016629		0.0650899			0.0198009		-0.0966452					0.00926376							-0.00883444		0.000280754			-0.0700502			0.0175504		-0.0587519
Effect_size	msp_1163																	0.0723928
Effect_size	msp_1164								0.0600352									-0.0458488				-0.0506176															-0.123381
Effect_size	msp_1165																																				-0.17595
Effect_size	msp_1166		0.0426734				-0.032933	-0.0750801		-0.119401										-0.0148006		0.00500638				0.00763684			0.0325571	-0.0530049					-0.075916		-0.0308983	0.0993788	-0.0705808
Effect_size	msp_1167		0.0213072					0.0171439		0.00287536					-0.0032018	0.0949426		-0.0245519				-0.0891136															-0.0750426	0.0852407
Effect_size	msp_1168	0.023982	-0.121326		0.0684556	0.0826789	0.0727803	-0.0540094	0.221434	0.0914267		0.0323323	0.195941	-0.158296	-0.107769	0.149596		0.148384		0.0429383		0.0982712	0.107798				-0.0316818	-0.0318787		-0.0402252				0.131955	0.100432					0.186588
Effect_size	msp_1169c
Effect_size	msp_1170	-0.0326698	0.0833094				0.067895	-0.0423944		0.0780454			0.0722368				0.058226	-0.145575		0.0326003	-0.166753	-0.151123			0		0.0247364	-0.00425933	0.0379486			-0.189445			0.00663134		-0.0420774		0.073621
Effect_size	msp_1171	0.048437	-0.0270844	-0.0321106	0.0486276	-0.0134957	0.0309951	0.089593	-0.0236278	-0.00573639	0.0236331	-0.00941608	0.000829702	-0.0780782	0.0146519	-0.0464362	0.0738638	0.00431222	0.0145065	0.010467	-0.00785674	-0.0556288			-0.0607516	-0.011049	0.142149	-0.0475856	0.0199022	-0.03372		-0.164453	0.0312713	-0.118912	-0.0329361		-0.0243744	-0.0824414	-0.0241065
Effect_size	msp_1172	0.200786	-0.0227157	-0.0630308	0.0360897	0.178663	0.285194	0.169305	0.291042	0.116778	0.113375	0.0106582	0.145173	0.0118233	-0.139556	0.23791		0.000814442	0.114231	0.016431		-0.141849					0.121711	0.0125219			-0.262606		-0.151284	-0.0219765	0.00741731	0.048523	-0.0654666	0.0922128	0.280902
Effect_size	msp_1173c	0.0626494	0.115261	-0.0484589	0.0815523	0.276976	0.0108302	0.0200353	0.0562593	-0.0477727	0.138854	0.16319	0.0995685	0.101582	0.293213	-0.0492057	0.0416638	0.0417347	-0.24418	-0.0565496	0.0281569	0.0348664	-0.209428	-0.302407	0.104146	0.0788292	0.102076	0.0519443	0.0374068	-0.184271	-0.0689472	0.0631676	0.0970482	-0.164422	-0.0264615	0.0858331	0.155555	0.0618374	0.0523508
Effect_size	msp_1174						0.0167247					0.00562224								0.0113583															0.0246738		-0.00993299
Effect_size	msp_1175		0.0874214											-0.00411822						0.070033	-0.0843196	0.0130166													0.00517865		-0.167861		0.0292044
Effect_size	msp_1176		0.0567332					-0.139117	0.00187656	-0.0231698			-0.0137468	-0.18535			0.0833411	-0.128769				-0.0627954					0.0494129									0.14236	-0.149299		0.103647
Effect_size	msp_1177	0.0423735	0.193456	-0.0579791	-0.0474323	0.127965	0.136465	0.226888	0.132495	0.117961	0.119588	-0.0254986	0.12805	0.304978	0.147511	0.161017	0.0526357	0.0288998	0.224525	0.0543261	0.00640184	-0.112798	-0.0921454		0	-0.0376486	0.205703	-0.0597768	-0.0316462	-0.103539	-0.22176	-0.0959592	-0.10303	-0.196727	0.00758229	0.0463512	0.0292937	0.138465	0.241821
Effect_size	msp_1178												0.0530028
Effect_size	msp_1179	-0.028586				0.0279635		-0.0338062	0.00375312	-0.0576703			0.0617745					0.119735		0.0195697								-0.000538439							-0.00647064		-0.0896614		-0.0228068
Effect_size	msp_1180	0	0.041		0.0351341	0.195234	-0.0539496	-0.0414524	0.0875091	-0.0908725		-0.0638679	-0.00515361		0.0320395		0.1112	-0.104184		0.0600549	-0.189561	-0.151299			-0.0607516		0.0248175	-0.0656237	-0.0372628	-0.0505531		-0.131594		-0.108628	-0.0436748		-0.0134419	-0.0476499	-0.0138247
Effect_size	msp_1181	0.0293113		0		-0.0290298			0.0240216	0.00404704	0.09702							0.0661013			0.00971591	0.00700894			-0.0326077												0.00728246	0.166019	0.0745022
Effect_size	msp_1182		0.172366	-0.101359				-0.024145	0.0600352	-0.0397321	-0.0210911		0.0145872	0.0438905	0.115511	0.132684		-0.0434357		-0.0135666													-0.100991		-0.0391417		-0.100164	0.0198506	0.0272575
Effect_size	msp_1183								0.083451	-0.0542978		-0.0200975				0.0955572				0.0115513			0.0324542					0.0429491			0.0142642			0.0521486	0.0593788		0.0443622	0.0852407
Effect_size	msp_1184	0.0199146	-0.0984947			0.0819055		-0.15016		0.00231084					-0.075815			0.00882076			-0.102071	0.109139			-0.0326077		0.104221										-0.0717795		0.0712461
Effect_size	msp_1185	0.127904	0.0784309				-0.0222387	0.0249656	0.0261104	0.0331891	0.116711	0.00498875	0.0671506	0.0316391	-0.0560033	-0.0182823	0.0891124	-0.00287481		-0.043502	-0.0245728				0.0546541		0.0148313	-9.24767e-05	-0.042617	-0.0476156		-0.140339	0.0303619		-0.0643981		-0.000258155	0.00884792
Effect_size	msp_1186							-0.076488																													-0.0960269	0.115558
Effect_size	msp_1187	0.0816744				0.083979				0.0463541								-0.0861253																			-0.0173249	0.0421834	0.073621
Effect_size	msp_1188	0.0519864	0.107222	0.00803183	0.0138674	0.15295	0.0747716	-0.0314725	0.12403	0.0567458	0.187339	0.01068	0.0922272	-0.0100726	-0.0293038	0.128171	0.0424536	-0.152204		0.0419275	-0.061014	-0.00169462		0			0.0315275	0.0328505				-0.264718	-0.0480692	-0.0148613	0.00260157	-0.0653314	-0.0611726	-0.0433879	0.221706
Effect_size	msp_1189	-0.0708039	0.0874214			-0.0214459	0.0121566	0.0761085	-0.0288013	-0.0393605			-0.0309691	0.0438905			0.0198659	-0.149041	0.0158595	-0.0259283		-0.103738	-0.0162838				0.0517344		-0.0318767					-0.0567897	-0.0737204		-0.0252131	-0.0258262
Effect_size	msp_1190c																			0.0262181							0.00291411			-0.0045726					0.0662542
Effect_size	msp_1191c	-0.029431	-0.0679731		0.204653	0.0178524	0.229433	0.0952119	-0.0597973	0.0276893	0.115252	0.118967	0.187026	-0.099817	-0.0966452		0.127412			0.0944534			0.0698465				0.147497			1	0.292891		-0.0170177	0.335685	1					1
Effect_size	msp_1192		0.0213072					0.0184626	0.101025	0.0444621
Effect_size	msp_1193				0.0935451		1				0.209309	0.232153	0.395332			0.135705				0.0192134			0.170392				0.00488774	0.00404262		1	0.276747			0.168109	0.0592798					1
Effect_size	msp_1194						0.0929767					-0.0200975	0.0250312			0.0964673	0.039793			-0.00807444			0.0389716			0.0788215		-0.0198838		-0.00599978				0.00137379	-0.00139227		-0.0664121	0.210574
Effect_size	msp_1195	0.196164	-0.0664938	0.0744381		0.305708	-0.00492266	-0.0600224	-0.0032485	-0.000826547	0.0662123	0.0521855	0.0624388		-0.124975	-0.00213817	0.0205215	-0.120012		-0.0112593		-0.0949233	-0.0293229				-0.0551191	-0.0509354		-0.0940343			0.115495	0.00588598	0.0161586	-0.0634673	0.0199626		-0.0965769
Effect_size	msp_1196	-0.0402575	0.16039		0.0122347	0.0474409	0.0345701	0.0677738	0.0281993	0.0766387		0.0471059			-0.00380493	0.0569498		0.00882076		0.0471685		0.107137	-0.0155826				0.0335574	-0.0206735	-0.0315635	0.281751	0.202493			-0.0204656	0.228115
Effect_size	msp_1197		-0.065944		0.0593345	-0.0269562		-0.0105025	0	0.0014685	-0.00683032	0.0636609			-0.0444275																		0.0663539				0.00393819
Effect_size	msp_1198	-0.047577	0.176014			-0.100512	-0.0244205	0.0504228		-0.111134				-0.00411822	0.049878			0.106582		0.0126725		0.011014	-0.00958119			0.0152321	0.0476061						0.0320031	-0.0424784	-0.0232211		-0.0599658		-0.0356676
Effect_size	msp_1199																																				0.0212668
Effect_size	msp_1200	0.113453	-0.0964387	-0.0230042		-0.0290298	0.0389524	-0.0293441	0.0611069	-0.0773324	-0.038431	-0.0101689	0.0508161	0.0404263	0.0107145	-0.00114305		-0.152507	0.0145065	0.0081728		-0.0212229				0.0906848		0.030195			-0.0063352		-0.230177			0.0529055	-0.0749974	0.0732895	0.19628
Effect_size	msp_1201	-0.0973705	0.158833		0.0164472	0	-0.0118015	0.0498869		-0.0156598			-0.0132687		-0.00684887	0.000138837	0.038461	-0.0828391		0.00770029		-0.137636					0.0709265	-0.0202326	-0.0114087	0.0134096			0.0416928	-0.0366837	0.0251597		-0.0126244		0.00182537
Effect_size	msp_1202							-0.0225353				0.00380054		0.0438905	-0.0032018							0.011014												0.051755
Effect_size	msp_1203	0.0174253			0.0854871													-0.0283291																			-0.0832302		0.0439006
Effect_size	msp_1204		0.0393265				0.00550727	-0.119181	0.103953	0.00231084		-0.0518928	0.0534355		-0.0966452		0.0301124	-0.219923		0.00746234		-0.170381								0.127722					-0.0302217	0.00521848
Effect_size	msp_1205		0.0213072	0.057087			-0.0798047				0.086071	0.0688453	0.0145872	-0.00411822			-0.00762824			-0.110134			-0.0711233			-0.0409932	-0.0656047	-0.0397618	0.0690559	-0.0312448					-0.116995		-0.061997	0.0195252
Effect_size	msp_1206		0.132903				0.138371	-0.0225353		-0.0698301				0.0822022				-0.0935465		0.00534211		-0.154426					0.0027261								0.0179449		-0.0587519		0
Effect_size	msp_1207						0.0708307	-0.024145					0.0785945																								0.0625939
Effect_size	msp_1208
Effect_size	msp_1209	-0.0306279	0.0241481	0.057087	0.0160647			0.114652		0.146533			0.0530028	0.0822022	0.0875134	0.0675723														0.0498335									0.073621
Effect_size	msp_1210														-0.0966452																						-0.061997
Effect_size	msp_1211		-0.041			0.0315717	0.100525	-0.109755		0.0444621					-0.127131		0.127412	-0.108297		0.0188639															0.0143907		-0.158551		0.0712461
Effect_size	msp_1212				0.0335192							-0.0199148																									-0.0465958	0.0290162
Effect_size	msp_1213	0.124351				0.127189	0.0171893		0.293914	0.169336	-0.110669	0.0694073	0.0152014			0.0269252		0.0294676		-0.0127203		-0.165569						0.0433296					-0.206329				-0.127064	0.0185489	0.0684204
Effect_size	msp_1214					0.018959																-0.0483168															-0.191592		0.0712461
Effect_size	msp_1215						0.175255	0.201293				0.0806134	0.321568	-0.00411822	0.0859914	0.083972		0.119735		0.011487							0.0720092							0.0283532	-0.0174438
Effect_size	msp_1216												0.139754
Effect_size	msp_1217	-0.0306279	0.0294212	0.0530094			-0.0146014	0.0259077			0.0429425			-0.0573953	-0.00684887			0.0723928		0.0322441			0.000145236				0.0235816	-0.0222383	-0.0140502				-0.0170177	0.0135286	0.0675576	0.234299
Effect_size	msp_1218	0.0199146						-0.0791255		0.00115542				-0.0590834																						0.171516	-0.152744
Effect_size	msp_1219	0.121642	0.0484515	-0.0825386	0.0423038	0.137118	-0.0425354	-0.161383	-0.108747	-0.0619484	-0.106237	0.00458092	-0.0512602	-0.107731	0.0515767	-0.143412	-0.0433911	-0.126443	0.0507499	-0.0662392	-0.181761	-0.100729	0.0659822		-0.099668	-0.070698	-0.130848	-0.0248087	-0.187821	1	0.171615	-0.173241	-0.0913516	0.0117442	0.0674423	-0.0512102	-0.181566	-0.17007	-0.0166588	0.124634
Effect_size	msp_1220	0.0199146	-0.063915		-0.00209652		0.0321678	-0.0730231		0.0444621	-0.00455355	-0.0352867		-0.0487769	-0.00062657			0.121836		0.009365		0.0678736					0.0931434	0.0208274		1	0.14084		0.141374		0.182504				0.0712461
Effect_size	msp_1221	-0.0159624	0.0334793			-0.0137798		-0.076488							-0.00228296			-0.0701881				-0.127811												0.051755			-0.0423937	0.0852407
Effect_size	msp_1222	0.0169689				-0.0781388	0.0734048	0.00110978		0.0520404	0.0785747	0.0595522	0.0785945	0.0674165	0.0449183	0.305093		-0.0410226		0.120276		0.0594053	0.0462617				0.0904899	0.0214988		0.227958	0.0719731		0.0528949	0.213495	0.183564	0.180092		0.0852407	0.0383259
Effect_size	msp_1223c		0.0334793			0.018959
Effect_size	msp_1225		-0.00455994										0.0250312																		0.0484963						-0.0821299		0.0311514
Effect_size	msp_1226																	-0.0458488				0.0576051															-0.154263		0.001693
Effect_size	msp_1227c	-0.00957743	-0.00638391	-0.0892926	0.0336823	-0.0121587	0.0710473	0.0318648	-0.0256012	0.0104276	-0.16319	0.0341746	0.0136659	-0.099817	-0.0981672			0.0199559										0.0602789					-0.0948391	0.0285648			-0.00432184		0.00669301
Effect_size	msp_1228
Effect_size	msp_1229		0.0241481											-0.00411822
Effect_size	msp_1230		0.0833094					-0.0433365		0.0368419		0.00357698			-0.00187971			0				-0.129319													0.00367473		-0.170496		0.104119
Effect_size	msp_1231	0.00272323	0.00622874			-0.0988905												0.103116				-0.0506176															-0.152741		0.151863
Effect_size	msp_1232							-0.024145		-0.0406781																											-0.0677709
Effect_size	msp_1233		-0.0303061					-0.0326602										0.178203				0.0982712												0.0287941		0.180092	-0.117669
Effect_size	msp_1234	0.176183	-0.101167	0.057087	-0.00480765	0.458301	1	0.283028	0.632183	0.596068	0.418024	0.301646	0.264017	-0.457944	-0.375029	0.101438		0.0242625	0.21146	0.0248401	-0.166753	-0.033303	0.0995445		0.218706		0.0425042	-0.0700893		-0.041328	-0.0078085	-0.0620444	0.0967466	0.132298	0.198986			0.0140968	0.212535
Effect_size	msp_1235	0.0708039	0.0213072			0.0698408		0.0730231	0.0302881	0.0319367					-0.0032018			0.104849		-0.0178257		0.00500638					0.0349404				-0.0472955		-0.0738533	-0.00901708	-0.0223823	0.16294	0.0266419		0.180087
Effect_size	msp_1236	0.0181215	-0.0792096	-0.187516	-0.0407668	0.0784311	-0.108621	-0.0354572	-0.0436556	-0.157179	-0.113437	-0.00268564	0.0388001	-0.291621	-0.0512882	-0.0770723	0.0355712	-0.107258	0.0148569	-0.163005	-0.113138	-0.00444087	-0.253345		-0.247261	-0.036581	0.00622377	-0.059335	-0.128372	-0.132242	-0.14457	-0.190234	-0.109156	-0.0611386	-0.215113	-0.0905297	-0.0581666	-0.0403745	-0.0757484
Effect_size	msp_1237		0.158833		0.0598739	0.0279635	0.0900454	0.0702383	0.195715	0.146533		0.0294155	0.138348	0.0316391	-0.00380493	0.113536										0.0610563	0.0719205	0.0431394		0.0810455	0.0692473				0.0743333
Effect_size	msp_1238	0.173349	0.0941757	-0.056582	-0.00271499	0.202884	0.0580798	0.124206	0.180318	0.0736122	0.0821483	0.0131588	0.101656	0.251954	0.256844	0.122336	-0.0178844	0.0205341	0.0912297	0.00479244	-0.100191	-0.174599	-0.0622257		0.353318	0.0184957	-0.0360607	0.0143605	-0.0665258		-0.150554	-0.182385	-0.22638	-0.0340995	-0.050528	0.0223172	-0.106595	0.0921514	0.107624
Effect_size	msp_1239		0.0897526		0.0057333			0.0197814	0.193313	0.0463541	0.0306367	-0.0737775		0.0455786				0.013654				0.00901149															-0.0781514
Effect_size	msp_1240	0.102369	-0.0679731			0.13851	0.0115233	0.0349735		-0.0304804			0.0634826					-0.0632559		-0.0179544		-0.127811					0.00329012							0.0298343		0.0811072	-0.0294111
Effect_size	msp_1241				0.0339603		0.015165			0.0444621		0.0255211				0.0191372	0.0189285			0.0294631	0.0226705		-0.0502362				-0.0769028	-0.0297149	0.0383091	-0.124318	-0.00210387				0.0249898		-0.074628	0.00696326
Effect_size	msp_1242		0.0355083					-0.0338062				0.0292328		-0.0590834																							-0.0105173
Effect_size	msp_1243	0.0199146	0.00467155		0.0593345	0.018959		-0.0770184		0.0375787		0.00357698						-0.0819241		0.0703698		-0.033303					0.0208893								-0.00458176	0.123607	0.0205256		0.165729
Effect_size	msp_1244	0.0338792	0.0392034	-0.194437	0.00661707	-0.0385423	0.225473	0.004218	0.129415	-0.184391	-0.0792313	0.160118	0.0983442	-0.364943	-0.264707	0.140195	0.0731946	0.221199	-0.127563	-0.0537747	0.438033	0.133105	-0.197192	-0.202567	0.241028	0.0517919	0.0236541	0.0818392	-0.104552	-0.195551	-0.254592	0.353593	-0.1117	0.0223673	0.0548007	0.240008	0.0687907	-0.125589	-0.0961961	0.0378553
Effect_size	msp_1245						0.0740276	0.0197814		0.00369689	0.086071							-0.0434357				0.00500638	0.0223616				-0.00168494			-0.008705
Effect_size	msp_1246								0.0576338	0.00287536																											-0.0248817	0.175478
Effect_size	msp_1247	-0.0127699	0.0857268					-0.0338062		-0.027263	-0.00455355		0.0236872		-0.0542532		0.0535177	0.0612891		0.00906127		-0.0279025					0.0708567				-0.0260874				-0.01592		-0.0450733		0.001693
Effect_size	msp_1248	-0.0505049	-0.0787112			0.00276597		-0.0553205	0.20822	0.0885137	0.0448096		0.0526581	-0.204692	-0.167348			-0.0517252				-0.202075					0.0591939				-0.0704833		-0.0150156			-0.0124877	0.0384331		0.0971694
Effect_size	msp_1249																																-0.0235449
Effect_size	msp_1250	0.066719		0.0530094	-0.0285595	0.136047	0.0076918		-0.0129048	-0.0487542	-0.00455355	-0.0725609	0.0145872			0.0836414		0.011761		2.88111e-05		0.00700965						0.0301135		-0.00909361			0.0303619	0.141934	0.0449212		0.10569	0.116123	-0.0445974
Effect_size	msp_1251		-0.00455994		-0.0294146		0.0699028	0.170362	0.250412	0.218622	0.0232404	-0.0147409	-0.000856981	0.0559209	0.0320395	-0.0220211	0.0406254	0.0585468		0.064937		0.00500638					-0.02089	-0.0204419	0.01802	-0.0283362				-0.0103707	-0.00150993		-0.0440201	0.0379373	0.228779
Effect_size	msp_1252		0.12802	0.133998			0.040282	-0.00102849	0.195715	0.0772239	0.113793		0.0526581	-0.0573953	0.154396		0.11543	0.0748059	0	0.00610385		0.111142					0.0576046	-0.0168325	-0.00482273	-0.0471614			0.0635		-0.0283313		-0.107303		0.073621
Effect_size	msp_1253		0.134932			0.127189		0.0171439		0.0444621			0.0373301	-0.00617733	-0.0032018		0.0633684	-0.0283291		-0.0279364		-0.0351031				0.00609848	-0.0429144	-0.00277957	-0.0334588		0.0133132			0.0135286	-0.0370634		0.00205609		0.073621
Effect_size	msp_1254			0.133998	0.0930746			0.0481309	0.0302881	0.00337253	0.0429425	-0.0343667		0.159513	0.0859914	0.0392864																	-0.0170177				0.0439476	0.0846457	0.001693
Effect_size	msp_1255						-0.0248264					0.0295982								0.062213			-0.00924204				-0.0339783	-0.0338518	0.106979	0.090172					0.0362708
Effect_size	msp_1256	0.140599	0.00689036	0.130357	-0.0145302	0.112428	-0.0912588	-0.140517	-0.068242	-0.159731	0.068426	-0.0516244	0.0299235	-0.249715	-0.184739	-0.0418886	0.0432701	-0.256237	0.0623232	-0.0741537	0	-0.16178			0.0546541	0.0160805	0.0434983	-0.0864696	0.020297	-0.104401		-0.05332	-0.0365164	-0.0400171	-0.101875	-0.0765985	-0.0211619	-0.0502668	-0.0415732
Effect_size	msp_1257		0.0334793						0.147263				0.00583584				0.160689	0.108315		0.035021															0.0300397		-0.0420599		0.104119
Effect_size	msp_1258		-0.0426734						0.0261104													-0.046016									0.00512359						-0.0594734
Effect_size	msp_1259c						0.140134				0.11817	0.0250957	0.092733			0.114317		0.011761		0.0493546							0.041168						-0.0170177		0.100474
Effect_size	msp_1260	-0.100563				-0.0453481			-0.0458536	-0.153899			0.0510584				0.0949365			-0.0433567							0.0902242		0.0430713						-0.032017		-0.0241447		-0.020737
Effect_size	msp_1261	-0.0326698	0.0607569	0.0530094		0.0745731	0.0300581	-0.0186525		0.128156		-0.0199148	-0.0311721		-0.129865		0.0936692	-0.0112901		0.0498497							0.0207706				0.003787		0.118032		-0.00472956	0.101384	-0.133741	-0.0262566
Effect_size	msp_1262		-0.0303061									0.00357698	0.0530028																					0.0737799			-0.0105173	0.0593714
Effect_size	msp_1263c									0.0299891																											-0.0475516		-0.0212864
Effect_size	msp_1264c	0.101507	-0.0266967	-0.0172531	0.0340051	0.158882	0.0767532	0.0538742	0.043114	0.258742	0.0325418	0.0820443	0.100917	0.0762273	0.140581	0.161624	0.0796459	0.146929	-0.266542	0.11995	0.0855849	-0.0802242	-0.0546052	0.0578799	0.299004	-0.0137649	-0.0823841	0.0024228	-0.132666	0.0641506	0.0383159	0.0187645	0.114903	-0.061395	0.0836524	-0.0495121	-0.0393255	0.0395905	0.0943098
Effect_size	msp_1265		0.134932			0.125385		0.0481309		0.0353682				-0.00411822	-0.0032018					0.100407			0.014084				-0.00915569	0.0470811	0.000748678	0.00920417	0.0692473			0.0735009	0.0734765
Effect_size	msp_1266												0.0365798							-0.000235891									-0.00586116						-0.0246948		0.0540568
Effect_size	msp_1267							-0.0778067		0.00115542			0.0246952		-0.0577534	0.0384307	0.107376										0.0696706				0.0330787				0.00367473				0.073621
Effect_size	msp_1268	0.0776119						0.0492769	0.103953	0.0772239		0.0636609				0.01934		0.0645148		0.00808199		0.0530214	0.0560122					0.0303292	0.0396328					0.0197163	0.052006		-0.115839	0.177896	0.149916
Effect_size	msp_1269	0.0762503	0.0857268	0.133998	0.0598739	-0.0121587		-0.0791255	-0.0597973	-0.172159	0.0448096	0.00357698			-0.0053269		0.0751501	-0.00431222		0.033024	-0.155995						0.00773332				-0.0465643	-0.0620444	0.0954652	-0.0163983	0.0248945		-0.118677		-0.0898604
Effect_size	msp_1270	0.021914	-0.0247668	-0.0823262	-0.0518583	0.0215928	0.00445582	-0.0844892	-0.170014	-0.151227	0.142989	0.0123628	0.105902	-0.232617	-0.144502	-0.023724	-0.0210851	-0.149486	0.172354	-0.0489114	-0.00630253	-0.0978641	-0.061938	-0.130677	0.185957	-0.0342565	-0.0138488	-0.0461332	-0.0184959	-0.0894709	-0.126499	-0.0661137	0.178333	0.0132102	-0.0581751	-0.126163	0.00214809	-0.0908963	0.0786876	-0.000886003
Effect_size	msp_1271	0.0174253	-0.0770806					-0.114189		0.0772239				-0.161921	-0.156016		0.0688688	-0.0410226				-0.046016					0.136692		0.0491345						-0.0225578		-0.0235836
Effect_size	msp_1272						0.0748636										0.0618696			0.0192948							-0.00168494			-0.00924906				0.000624451	-0.0067326
Effect_size	msp_1273							0.0515688	0.103953	0.0772239					-0.00106727			0.00882076
Effect_size	msp_1274		-0.0303061						0.103953				0.0365798														0.041168	0.0419688									-0.0626291		0.0712461
Effect_size	msp_1275		0.172366	0.057087			-0.0414615		-0.0352016		-0.00455355		0.0362046				0.0941976	-0.122759	0.126256	-0.0174843		-0.0668905				-0.000302912	0.0189161			-0.0304674			-0.0150156		-0.0621927		-0.164709	0.0995097
Effect_size	msp_1276		-0.0279748		0.0695723		-0.0417417	-0.0338062		-0.0569958	0.0291778	0.121362	0.0791238	0.0316391	-0.0560033					0.0163668			0.0255633				-0.0511908	-0.0501372		-0.0442719			-0.0235449		0.0555662		0.10113
Effect_size	msp_1277						0.0224414					0.00380054					0.0830794			0.078712
Effect_size	msp_1278																													0.0327313
Effect_size	msp_1279	-0.0941581	-0.0972764	-0.145112	-0.0180688	0.0174795	0.161638	0.135148	0.168573	0.119569	-0.0830574	0.00806055	-0.00944064	0.0819581	0.155172	0.149016	-0.0238512	0.303462	0.0937633	0.0498708	-0.209948	0.152006	0.0170823	-0.247582	-0.290423	-0.129327	-0.00635858	-0.0569343	-0.203394	-0.162304	-0.232939	-0.066625	-0.0421888	0.279059	0.192914	0.0622711	0.0203926	-0.0401968	-0.0524973	-0.0557741
Effect_size	msp_1280																																				-0.00993299
Effect_size	msp_1281			0.0530094							-0.00683032																											0.115558
Effect_size	msp_1282		0.119653	-0.051851	0.0953721	0.018959	0.042593	0.0743458		0.0104276	-0.111775	0.0524526	-0.0220148	0.0943598	0.225386	0.108701		-0.0112901		-2.88111e-05		-0.124211					-0.00124154	0.0301135	0.00764658	0.0187766			-0.204146	0.010255	-0.0272129		0.0664379	0.223184	0.0552987
Effect_size	msp_1283			0.0530094					0.00187656	-0.0556468	-0.00683032						0.0493231			-0.0140222								0.0880068	-0.00318282				-0.0150156		-0.0203664		-0.00468229
Effect_size	msp_1284						0.0349232									0.0675723	0.0196062			0.00109323			0.0101296				-0.0418031	-0.02014		0.0461627				0.0287941	0.0610165
Effect_size	msp_1285	0.0718307	-0.0256204			-0.0290298		-0.0800505		0.0032307			0.0573548				0.0927905	-0.0458488				-0.0483168					0.0237077	0.0253309							-0.0516718		0.0386177		-0.0243273
Effect_size	msp_1286															0.0680747																		0.0287941			-0.162696
Effect_size	msp_1287	-0.103865	-0.220639	-0.0455019	-0.0501975	-0.0670963	0.0234675	-0.155909	-0.0885991	0.0521731	0.0149975	0.00132179	0.0355027	-0.320051	-0.333107	0.0548408	0.0464377	-0.144976	-0.155808	0.123339	0.123089	-0.0422113	0.11372		0.218706	0.0338911	0.121466	0.0123053		0.146306	-0.0930335	0.0614031	0.0829392	-0.0307677	0.185906		-0.0151329	-0.00173367	-0.170739
Effect_size	msp_1288																	-0.118982		0.035021		-0.122411														0.0811072	-0.0893182		0.073621
Effect_size	msp_1290	-0.117231	-0.063915			-0.150364	-0.044423	0.0357507		-0.0909202					0.0343696			0.0724153		-0.0576175		0.0530517					0.05777		-0.0438282						-0.0890844	0.0192014	-0.0922995	-0.0331007	0.0201288
Effect_size	msp_1291	0.0237526	-0.122544	-0.472308	0.058278	0.101191	0.148441	-0.254053	0.00466851	-0.0414289	0.00580759	0.133419	0.118268	-0.593359	-0.421596	0.116317	0.0762646	0.124238	0.275891	-0.0157397	-0.0534977	-0.050762	-0.151162	-0.578542	-0.375154	-0.0780529	0.199603	0.0334322	-0.133599	-0.188505	-0.432666	-0.199142	-0.0607318	-0.00478784	0.0181483	0	-0.0194681	-0.192232	0.110236	-0.0578489
Effect_size	msp_1292	0.0735271	-0.171786		-0.00926887	0.111129	0.144228	-0.214907	-0.0320015	-0.0716405	0.0648746	-0.046019	0.00491094	-0.21136	-0.0308185	0.019625		-0.118608	0	-0.0218907		-0.0674506					0.0762934	-0.0177543		-0.025782	-0.155256		-0.0722121	-0.00233347	-0.0282453		-0.0762718	0.011138	0.18032
Effect_size	msp_1293	0.0350495	-0.0372159	0.0530094	0.0629786	0.225179	0.0700495	-0.0657899	-0.0683397	-0.110865	0.294872	0.00346864	0.293736	-0.237802	-0.121315	0.0988458		0.158722		-0.028089	0.0995731	0.0195062			0.0446538		0.00805685			-0.0240713	-0.0536282	-0.00344188	0.290728	0.0106647	-0.023153		0.0684461		-0.0702485	0.0795703
Effect_size	msp_1294						0.0708307													0.0668621
Effect_size	msp_1295							-0.0225353		-0.0387861		-0.00924388	0.145981		0.0481279	0.0283517													0.0520653					-0.0087888			-0.0105173	0.191536	0.0311514
Effect_size	msp_1296c	-0.0735271	-0.00638391	-0.0202349	0.136135	-0.119689	0.0889172	0.0945318	0.0261104	0.136287	-0.0116001	0.00866193	0.0213325	0.194614	-0.0444275	0.222758		0.00882076		0.01168		0.00420579						0.00833377			0.118018		-0.0999656	0.0160257	-0.0171312			0.0279403	0.177496
Effect_size	msp_1297	0.0174253			0.0598739			-0.0225353		0.00231084		0.00357698						-0.0819241				-0.0911162															-0.0618738		0.073621
Effect_size	msp_1298															0.0507532
Effect_size	msp_1299	0.0174253	-0.063915	0.057087	-0.0252956	0.280097	0.100525	-0.037684		-0.0206649	0.0828231	-0.00221458	0.0607109	0.0580311	-0.0936012	-0.00466509		-0.0840247	0.0145065	0.0494454		-0.0931187			0.0546541						-0.0214281	-0.0956168	0.0663539	-0.0143895	0.0142954		0.0624398	-0.0489924
Effect_size	msp_1300c	-0.0175609	-0.0940206	0.00602387	0.0599094	0.0551953	0.165868	-0.0250861	0.125534	0.200079	0.0394675	0.0716927	0.204687	-0.0586402	0.0365447	0.0871249	0.0315565	0.221927	0.200887	0.0254884	-0.155995	0.120957	-0.0682578		0.109308		0.0206839		-0.0903583	-0.116979	-0.0633326	-0.074053	-0.0993801	0.0210615	0.123625	0.174819	-0.0115724	-0.00766306	-0.0445974
Effect_size	msp_1301		-0.0700021																																		-0.0963984
Effect_size	msp_1302	-0.0440377	-0.00383835	-0.0266067	-0.0187501	-0.0179904	-0.0749385	-0.18886	-0.127808	-0.261615	0.0859359	0.0839107	0.0798745	-0.442686	-0.0255073	-0.0751236	0.0589183	-0.269481	0.259816	-0.0926842	-0.0292136	-0.0889172	-0.168115		-0.235969	0.036642	0.0741448	-0.00831021	0.096925	-0.153332	-0.249691	-0.12665	-0.0865287	-0.202466	-0.102529	-0.0607253	-0.0879708	-0.107323	0.0459211
Effect_size	msp_1303								0.198116																												-0.0797868		0.073621
Effect_size	msp_1304	0.0199146			0.112466							0.00357698						-0.115205
Effect_size	msp_1305	0.113792	-0.0343061	-0.101359	0.0308218	0.142778		0.140911	0.071467	0.106679	-0.0137092	-0.082088		-0.00369289	0.00164165			-0.125823				-0.158344									-0.0378521		-0.181452				-0.0415591	0.100222	0.140993
Effect_size	msp_1306c																														0.0478705
Effect_size	msp_1307	-0.0143661	0.0915641			0.109829		-0.10787	0.0600352	0.00451842				-0.134466	-0.00164165		0.228033	0.026046		0.0497179		-0.152775					0.147931				-0.00899707					0.0778023	-0.216901	-0.0134239	0.0272575
Effect_size	msp_1308	-0.0976477	-0.0516106	-0.262355	-0.0200049	0.0466575	-0.0762438	-0.040163	0.167205	0.123501	-0.124228	-0.0354102	-0.0276273	-0.261407	-0.273448	0.0213458	-0.0122118	-0.25259	0.341716	-0.0349363	0.0325656	-0.153032	-0.0990604		0.0199336	-0.0849496	0.145107	0.00479375	-0.0673641	-0.0227856	-0.230724	0.0186954	0.0286361	-0.0747758	-0.0697574	-0.121886	-0.105599	-0.101186	0.0677097
Effect_size	msp_1309	0.106861	0.0874214		-0.00944944	0.00553195	0.157026	0.200637	0.245611	0.187242	0.0807881	0.00193045	-0.0712834	0.160636	0.0481279	0.145531		0.0291471		0.00808199		-0.11019					0.0699079					-0.157601	0.0281954	-0.0380573	0.0302618	-0.0336388	-0.0724996	0.0140323	0.0729818
Effect_size	msp_1310		0.0897526					0.0515688		0.0764023			0.0432908	-0.00617733	0.049878	0.15296				0.0368137		0.00700965	0.0563965											0.00972597	0.00342699	0.244712	-0.0960269	0.00480315
Effect_size	msp_1311	-0.0287734	-0.0157798		0.0485501	-0.0632677	-0.0429312	-0.189319	0.0584027	0.00581161	0.208057	0.0105945	-0.0364392	-0.239554	-0.14493	0.018916		0.0745165		-0.00840586	0.0130946	-0.0917378			-0.163962		-0.000274147	-0.0345763		-0.0629083		-0.232166	0.0635	-0.0619306	0.0179059		-0.0467787	-0.0300829	0.0220251
Effect_size	msp_1312	0.226028	0.235234	0.0588556	0.0158356	0.202952	-0.0449812	0.213492	-0.11525	-0.109584	-0.117574	-0.0346699	0.0302465	0.115228	0.250608	-0.0947849	0.0831322	-0.231203	0.0264325	0.00993463	0.130263	-0.10559			0.27803	0.068979	0.00143713	0.0351949	0.122448	-0.0977431	0.0153198	0.0527485	-0.091068	-0.241909	-0.0870083	-0.0575618	0.0778559	0.0985912	-0.0684163
Effect_size	msp_1313			0.133998																		0.111142															-0.111795
Effect_size	msp_1314												0.0362046																								0.0105871
Effect_size	msp_1315	0.00541471	-0.159885	0.0921659	-0.0294146	0.123664	0.118469	-0.0319645	0.0459897	-0.111149	0.0765835	-0.11917	-0.138222	-0.0125811	0.0594936	-0.0849679		-0.195412	0.126256	0.0207096	-0.251532	-0.0235341			-0.291608		-0.00721674	-0.0294554	-0.0201816		-0.193356	-0.343822	-0.156697	-0.165495	0.00904653	-0.0377401	-0.0498071	0.0176791	0.384531
Effect_size	msp_1316									0.00115542												-0.046016												0.0284724			0.0633369		0.0712461
Effect_size	msp_1317																																				-0.0151329
Effect_size	msp_1318		0.0893748					0.0296761		0.0300581			0.0145872		-0.0542532	0.083972																							-0.001693
Effect_size	msp_1319									-0.0406781	0.0466766							-0.0410226																					0.0311514
Effect_size	msp_1320c		0.13899					0.0197814	0.329336	0.0463541					-0.00106727																								0.0712461
Effect_size	msp_1321c																																				-0.00993299
Effect_size	msp_1322	0.0796325	-0.065944			0.0214869		-0.119181		0.00231084						0.0507532				-0.0220362		0.0655728							0.00785325						-0.0270473		-0.0753477
Effect_size	msp_1323	0.137061	0.0416324	0.00224059	0.0108226	0.299725	-0.166508	0.114772	-0.089644	-0.224107	-0.105856	0.0906771	0.0672664	-0.0572149	0.161134	-0.192914	0.0682081	-0.340305	0.197779	-0.152847	0.199669	-0.164004	-0.173196		-0.0929785	0.100255	0.092953	0.0772348	0.117804	-0.0461884	-0.0713714	0.0502516	-0.0459558	-0.254329	-0.243073	-0.0838214	-0.00594156	-0.10331	0.0228949	-0.0503518
Effect_size	msp_1324	0.0174253	0.0241481											-0.00411822	-0.00106727			0.00882076																			0.0764389	0.0359179	0.0311514
Effect_size	msp_1325	0.199092		0.257468	0.121749	0.233033	0.118354		-0.0352016	0.0313085	0.145801	0.126171	0.029891			-0.0277478	0.00258335			0.0415853			1			0.0102457	0.0142453	0.0816914	0.00926989	1	1		0.064927	0.0307982	0.224116		0.00362314	-0.0129067	-0.0621884	0.142221
Effect_size	msp_1326																			0.0666525																	-0.0147183
Effect_size	msp_1327	0.114917		0	0.0225147	0.34319	1	0.367755	0.518955	0.451572	0.320592	0.287588	0.240346	-0.0983491	-0.0430605					0.0367925			0.17346				-0.00920051			0.118386			-0.0738533	-0.00787568	0.126029				0.0712461	0.166399
Effect_size	msp_1328	-0.101729	0.0522537		0.0593345	-0.145214	-0.0394451	-0.141784		-0.0294735	0.0828231			-0.119073		-0.0211083		-0.00645148	0.114231	-0.0767277		-0.0184422				0.00128213	-0.0117811	-0.0494409	-0.039543	-0.059549			-0.0150156	-0.0601799	-0.0836056		-0.0299169		0.0684204
Effect_size	msp_1329		0.0266236		0.04013		-0.112592	-0.132899		0.0375787	0.0466766	0.0443143	-0.030766	-0.18198	-0.0349755		-0.0681141	0.00882076	-0.235277	-0.0701763		0.00700965	0.0136978			-0.0254852	-0.0525738	-0.0186085	-0.122246	1			0.0320031	0.0675907	0.0708888				0.104119	0.0977456
Effect_size	msp_1330																																				-0.00993299
Effect_size	msp_1331		0.125671	-0.051851		0.0214869	0.0242924	-0.0522471	-0.00946352	0.0714955	-0.189065	0.0360074		0.00396647	0.112592								0.00879105				0.0598822	-0.0141468	0.0248915	0.000281258	0.0118868		-0.0947578	0.0585969	-0.0243842		-0.0475516	0.0414234	0.0220251
Effect_size	msp_1332	0.124351		-0.101359				-0.0225353			-0.120653	-0.0285657		0.0455786	-0.00106727			-0.0840247				-0.0911162												0.0129708				0.0987976
Effect_size	msp_1333																	-0.115205				-0.126011														0.108143	-0.147612		0
Effect_size	msp_1334																																				0.0209609		0.0712461
Effect_size	msp_1335				0.0847221
Effect_size	msp_1336	0.0293113	0.0242784		-0.0378154	0.345212	0.0364531	0.145905	0.161608	0.224996		0.0831803	0.226928	-0.159505		0.246731		0.106582	0.0264325	0.0884566		0.0594053	0.0643597				0.0841134				-0.0217944			-0.0725026	0.104718		0.0217447		0.101056	0.0768946
Effect_size	msp_1337c							-0.0225353			-0.00455355					0.235551																	-0.0150156
Effect_size	msp_1338																																				-0.0750426		0.0712461
Effect_size	msp_1339	-0.00814054	-0.0464708	-0.247067	-0.041204	-0.133474	0.113683	-0.102406	-0.0314088	0.0490692	-0.181497	0.0271787	0.0474026	-0.211416	-0.34148	0.375467	0.00534325	0.0845773	-0.145416	-0.0390671	-0.0327151	0.0971115	-0.0999174		-0.0287617	-0.0406996	1	-0.0231881	-0.160045	-0.190255	-0.286455	-0.103192	-0.275478	0.0513959	0.17626	-0.25692	0.00756506	-0.0766191	0.0811663	0.0213348
Effect_size	msp_1340						0.0559933			-0.0706516	-0.0597461	0.00898119					0.125187	-0.0882259		-0.0408741			-0.0716081			0.00594742	-0.0437855	-0.0258942	0.0355264	-0.0438602				0.0287941	0.0529576		-0.0155475	0.0593714
Effect_size	msp_1341	-0.0326698	0.0241481			-0.0290298	-0.0121219	0.0184626		-0.0294735	-0.105559					0.135269	-0.00659901			0.0354529		0.00420579	0.0166881				0.0486207	-0.0597606	-0.0446983	0.189642					0.156829
Effect_size	msp_1342	-0.0723537	0.0716401	0.111516	-0.0785046	-0.0368072	-0.0365839	-0.0806297	0.0846309	-0.0210614	0.114292	0.0389332	0.0682298	-0.363395	-0.120854	-0.0822525	-0.00183474	-0.167229	0	-0.0613635	0.108469	-0.0750329	-0.127303		0.178028	0.00530749	0.102943	-0.100285	-0.0521269	-0.159291	-0.181191	0.0117278	0.059156	-0.087962	-0.111056	-0.0707956	0.00543312	-0.115559	0.216882
Effect_size	msp_1343	-0.153071	-0.125554	0		-0.0621862	-0.0546088	-0.0924506		-0.118336	-0.0121799		-0.0415298	-0.13512	-0.0959462	-0.0276165	0.049739	-0.0872449		-0.0510846	-0.0445215	-0.122281					0.00703501	-0.017964		-0.0946444		-0.28685	-0.0263989	-0.0436352	-0.0517971	-0.0640127	-0.217939	-0.0361727	0.0253752
Effect_size	msp_1344c				0.0344013		0.0627915					0.0252375				0.0265686				0.00931438						0.148196			0.2296					0.02793
Effect_size	msp_1345c								0.101025				0.108979			-0.0351758																					0.0141767	0.026641
Effect_size	msp_1346c																	0.011761																					0.0272575
Effect_size	msp_1347c	-0.136528	-0.0220148	0.149752	0.0927935	0	-0.0281571	-0.129287	-0.081801	-0.0842683	0.174529	-0.00754777	0.0714881	-0.310097	-0.174875	-0.0675227	-0.00840314	-0.177373	0.461113	-0.064107	-0.282494	-0.0509291			-0.191745	0.000459652	0.0984955	-0.0861789	-0.0220031	-0.115387	-0.192211	-0.313445	0.187949	-0.0751033	-0.0551191	0.0825798	-0.194247		0.0405748
Effect_size	msp_1348	0.0199146	0.0213072			0.166168						0.00380054		-0.00617733						0																	-0.00993299
Effect_size	msp_1349	0.15799	0.0370505	0.142855	0.00445358	0.265787	-0.00970999	-0.0307566	-0.120058	-0.128549	-0.0119455	0.0159333	0.0323492	0.211797	0.101065	0.0144918	0.0588167	0.0968157	-0.130914	-0.0233756	0.0574962	0.046492	-0.162701	-0.405134	0.366628	-0.0103637	-0.0753035	-0.00228282	-0.0370774	-0.230249	-0.188079	0.0295605	-0.183918	-0.0283946	-0.0336464	-0.176715	0.104072	-0.00168119	-0.0794948
Effect_size	msp_1350		0.0874214					0.0184626																													0.0217447
Effect_size	msp_1351	0.123034	-0.148461			0.155145	0.0323282	-0.0481188		0.18418	-0.00730792	-0.0537156	0.107756	-0.237802	-0.162529	0.0045309	0.00912968	0		-0.0246095		-0.186049	-0.0285948				0.0731826	0.0605035	-0.0243684	0.0861335	-0.103738		0.119378	0.000977049	-0.00563054		-0.00553062	-0.00280055	0
Effect_size	msp_1352				0.125732		-0.00974645					0.0249539					-0.0226322			0.0184764			-0.0245402			0.0733894	-0.0323373		0.0735151	-0.0334511				0.0758554	0.0851846
Effect_size	msp_1353	-0.078235	0.0355276	0.0367811	0.0223485	-0.0874098	-0.00785271	-0.051794	-0.047562	-0.0719102	0.273232	-0.00881103	0.0507224	-0.393031	-0.311812	-0.0703144	-0.0109032	-0.313492	0.0158595	0.00339938	0.182735	-0.217718			0.0546541		0.0720652	-0.0466224	-0.0914155	-0.12626	-0.180315	0	0.0942543	0.00108691	-0.0368505	-0.134163	-0.173179	-0.0598961	0.0439329
Effect_size	msp_1354																																				-0.0475516
Effect_size	msp_1355							0.0156085	-0.0336016	-0.0146495				-0.0461404	0.0320395			-0.0903208				-0.0585187						0.0600893								0.0715781	0.0423378		0.00304228
Effect_size	msp_1356	-0.0338101	0.0407654	-0.0720239	0.0131056	0.0296561	0.188959	0.180019	0.0589399	-0.0228027	-0.130284	0.0161176	0.0342219	0.27281	0.193819	0.147018	-0.0248037	0.013268	0.120462	-0.0438591	-0.204109	0.0233137	-0.0914986	-0.315104	0.366628	0.018459	0.187157	0.0407387	-0.0500254	-0.160508	-0.341895	-0.0788316	-0.0882408	0.0553574	0.0259091	0.0264974	-0.0168638	0.162886	0.134068
Effect_size	msp_1357	0.077572	0.116517		0.112025	0.0461411	0.0514526	-0.0577087	0.105357	-0.0186907	-0.0157767	0.0635191	0.137427	-0.0369585	0.0697206		0.0274166	0.132241		0.0541521		-0.0871111				0.0181558	0.0307727	0.0118605	0.0501138	-0.00247977					0.0602162		-0.0975142	0.0998657	0.0518425
Effect_size	msp_1358	0.0415891	-0.0118558	0.00120666	-0.00175075	-0.0175466	0.0137735	0.10622	0.06497	0.0404784	0.115293	-0.0599775	0.130645	0.211016	0.216161	0.0935515	0.0176586	0.14032		-0.025198	-0.0843196	0.186214				0.00918265	0.0161496	0.0732699	0.0139984	-0.0501385	0.216259	-0.104511	-0.0687763	-0.0788531	-0.0338423	0.171516	-0.0441254	0.177125	-0.0400575
Effect_size	msp_1359																																				-0.0421627
Effect_size	msp_1360		-0.121326		-0.0429364		-0.0197826	0.0547058	0.0817304	0.135243		-0.0864558	0.0343317	-0.00856392	-0.0727797	-0.0214248		0.011761		-0.00437861						0.000201941	0.00187635	-0.0156473	-0.0189872	-0.0608007	0.0410564			-0.0589237	-0.0621635	0.244712	0.0846574	-0.036008	0.0480816
Effect_size	msp_1361						0.0666589	0.281709	0.360919	0.279317		0.130145	0.217899	-0.00411822		0.0477866		0.00882076		-0.0302491							0.0789933	0.00576797			-0.0856816			0.00807441	-0.0390313			-0.0353209	-0.001693
Effect_size	msp_1362	-0.0676839	0.0941683	-0.167045	0.0322344	-0.0131833	0.0576021	0.0362298	-0.0516992	0.0675465	0.00738337	0.0464147	0.126197	0.0908486	0.260919	-0.0192748	0.0537685	0.187657	0.0146949	0.026278	-0.0195394	-0.0021877	-0.101736		0.076698	-0.105913	0.0455004	-0.134874	-0.145454	-0.0914209	-0.0604436	-0.235217	-0.178821	0.0490085	0.0734779	0.102399	-0.0204393	-0.00911871	0.121614
Effect_size	msp_1363							-0.024145
Effect_size	msp_1364																					0.00420579																	0.073621
Effect_size	msp_1365				0.0285883			-0.024145			-0.00683032	0.0304067	0.0581967	0.0438905		0.0817809															0.0484963		0.0320031	0.0894497
Effect_size	msp_1366																			0.0667573															0.0593257		-0.0173249
Effect_size	msp_1367				0.0598739				0.195715	0.00231084																											-0.081836
Effect_size	msp_1368		-0.0279748			0.0214869		-0.0791255	0.103953	0.00115542			0.0538682																								0.0304035	0.0593714	0.0712461
Effect_size	msp_1369	0.0775907				0.0798319				0.0788669																											-0.148498		0.073621
Effect_size	msp_1370																																				-0.0143037
Effect_size	msp_1371																																	0.0284724				0.169291
Effect_size	msp_1372		0.0213072				-0.00857863						0.138041		-0.00106727		0.0431425	-0.0434357		-0.00415918							0.0317947	-0.017177		-0.0258445					-0.0119466		-0.12366	0.0425375	0.147969
Effect_size	msp_1373	-0.0657285	0.0213072			0.0726068		-0.024145		-0.0387861		-0.0518928	-0.0130296	0.109419		0.000694187	0.0993984	-0.124827		-0.0489683							0.00560438	-0.0282555		-0.0573981					-0.0460976		-0.0531008	-0.00734726	0.161168
Effect_size	msp_1374									0.00115542								0.011761																-0.00787568			0.0629654	0.117536	0.0712461
Effect_size	msp_1375																												0.0302851						0.0767812		0.0212668
Effect_size	msp_1376																	-0.0434357																			-0.0465958
Effect_size	msp_1377	0.133907			0.0164472	0.075103	0.0896352			0.0330619	0.0479822	-0.0131859					0.0751501			0.0705827								0.042854		0.000264077	0.0137887		-0.0343471		0.101686		-0.0151329		0.00840591
Effect_size	msp_1378				0.0236378	0.0297676			-0.0129048	0.00158499	0.0320956	-0.0731696	-0.000666559					0.106582				0.00700894															-0.149365	0.0927275	0.0220251
Effect_size	msp_1379		0.0897526					-0.0225353		-0.0979994				-0.00411822	-0.00106727			-0.118982				-0.0230528															-0.144165		0.0383259
Effect_size	msp_1380	0.0199146											0.0240232																								-0.0628827
Effect_size	msp_1381	-0.0966201	-0.0649422	-0.038072	-0.0102262	-0.0428976	0.178815	0.0508983	0.0221359	0.0623218	-0.08322	-0.00285964	0.251187	0.248927	-0.0118374	0.244645	0.0125746	0.287557	-0.0340335	0.0914323	0.0710882	0.29625	-0.141069		0.0181514	-0.0569224	0.0700274	0.144003	-0.0918786	-0.0724893	0.0522672	0.0774938	-0.251821	0.209676	0.239572	0.126938	0.0297838	0.0796023	-0.120338
Effect_size	msp_1382				0.0723508		0.0710473		0.103953	0.00115542		-0.0638679	0.0530028			0.0680747		0.011761				0.00420579					0.0591939								0.0300397
Effect_size	msp_1383c	-0.028586							0.00375312			-0.0200975	0.187401					0.0310907				-0.0230528						0.0600893									0.0301513	0.0852407
Effect_size	msp_1384	0.0199146				0.018959					-0.00683032	0.00530549	0.0785945					-0.0458488		0										0.0130038			-0.0170177				-0.0430789		0.0712461
Effect_size	msp_1385	0.0281491	0.119895	-0.109701		0.112746	0.100371	-0.0626313	0.0482628	0.00901991	0.120852		0.0239166	-0.249088	-0.205748	-8.10502e-05		-0.150426	0.00528651		0.0455919	-0.00952722			0.0958725		0.0840135			0.0327313	-0.168966	-0.0292575	0.0666528	0.0377934		0.261236	0.0202138	-0.0721835	0.0463442
Effect_size	msp_1386			0.0530094							-0.00683032		0.036955	-0.00411822	0.0890353												0.104374											0.0425375
Effect_size	msp_1387		-0.041				0.0638791	-0.10787			-0.00683032			-0.134466	-0.0407775					-0.00705153							0.0495134								-0.0115081		0.0217447
Effect_size	msp_1388	-0.0845145	0.0864237	-0.0763024		-0.000853755	0.0036995	0.011501		-0.0607478	-0.114125	0.0096547	0.00545061	0.0819081	0.113036	-0.0581406		0.123327	0.21146	-0.0266215	0	0.234723		0.102062	-0.0326077		0.0246561				-0.0466911	-0.189445	-0.228127	0.171285	0.0378743	0.0137153	-0.0591204	0.0188348	-0.0356676
Effect_size	msp_1389	-0.0692813	0	0.140698		-0.00891635	-0.0141379	-0.189491		-0.191067			0.0341339	-0.209538	-0.0564537	-0.040281	0.0370228			-0.0459795	-0.0504878	0.0453371			0.29025	0.0259492	0.139865	0.0472902		-0.00985833		-0.140339	0.0320031	-0.0798717		0.123607	-0.0848861		-0.0421654
Effect_size	msp_1390							-0.024145						0.0438905	0.0875134																						-0.0470737
Effect_size	msp_1391
Effect_size	msp_1392				0.112907											0.0955572																		0.0521486
Effect_size	msp_1393							-0.024145		-0.0387861						0.0511888				0.011487		-0.0369033				0.0606381	0.00763289							0.0126918			-0.0837878
Effect_size	msp_1394																																				-0.0470737
Effect_size	msp_1395																	0.011761		0.035021		0.00700965
Effect_size	msp_1396c		-0.0966707	0.057087				-0.079644	0.00750623	-0.0244222				-0.130511	-0.0384474							-0.0891136											-0.0150156				-0.0166455
Effect_size	msp_1397c	-0.00958095	-0.0212283	-0.154613	-0.0222228	0.0662119	1	0.0543486	0.0996621	0.100425	-0.0576134	0.058868	0.16787	-0.0142732	0.0395374	0.195088	-0.0296142	0.213611		0.0386311		0.0868227	0.0465571				-0.039982	-0.0732805		-0.0935072	0.0235769		-0.256225	0.151872	0.204834	0.366239	0.00267797	0.0818882	-0.00425919
Effect_size	msp_1398																																				-0.0465958
Effect_size	msp_1399		0.0874214					0.115528	-0.0111842	0.0287938		-0.0744312	0.0236872	0.184644	-0.0032018			0.0748059				0.0655728					-0.00488254	0.0251943	0.00387459						0.0228979		-0.0592306		0.0207295
Effect_size	msp_1400	0.122575		-0.0989459	-0.0108323	0.197004	0.0514982	0.133905	0.273359	0.0732473	0.0100995	-0.059338		0.206768	-0.00106727	0.0368701					-0.155995	-0.099127			0.0819811		0.041168	0.0419688				-0.130132	-0.133732	0.000624451			-0.0426038	0.129564	0.317707
Effect_size	msp_1401c											0.00357698								0							0.0207706								0.0205527				0.0292044
Effect_size	msp_1402	0.0293113	0.129694	-0.040868	0.0279429	0.154895		0.234839	-0.0084461	0.130635	0.0537577	-0.0761404	0.0193633	0.0682728	-0.000760986	0.120899		0.158643			-0.017552	0.00700965			0.0819811						-0.0419079	-0.05332	0.0240943	-0.042648			-0.0803772	-0.013182	0.00505098
Effect_size	msp_1403	0.0812281	0.00898987	-0.432964	0.0180773	-0.0494248	0.0451056	-0.109894	-0.121242	0.0839153	0.0336353	0.0474705	0.112967	-0.514132	-0.32792	0.0674505	-0.0287554	-0.124855	-0.172061	0.0122158	0.0692345	-0.237961	-0.105848		-0.163363		0.13287	0.0333298		-0.128703	-0.378697	-0.0145299	0.0150925	-0.0395793	0.0287702	-0.200853	-0.148859	-0.109383	-0.0408446
Effect_size	msp_1404	0.0199146	-0.063915	0.00603328	-0.0787205	0.169411	0.00601946	0.0156085	0.00750623	0.0277676	0.0543095	-0.000344816	0.00906836	-0.0500952	0.092741	0.0126436	0.0746122	0.104849	0.0370055	0.114561	-0.319527	0.0933164	0.036576	0.235219	-0.163962		0.066544	0.0253776	-0.0426217	-0.00658226		-0.20041	-0.0312713	0.0386531	0.0795425		0.010608	0.0375253	0.0411132
Effect_size	msp_1405															0.0955572				0.0348928											0.0983352			0.0521486				0.0852407
Effect_size	msp_1406									0.0012323			0.036955							0.035021														0.0552015			-0.0470737
Effect_size	msp_1407				0.0348437			-0.024145			-0.105559	-0.0637384		0.0792664	-0.0032018	0.148604																	-0.116298	0.105121			-0.0429056	0.241573
Effect_size	msp_1408																	-0.0861253				-0.0351031														0.123607
Effect_size	msp_1409						0.0383914			-0.0387861			0.130894							-0.00594693								-0.036746	-0.00418396						-0.0553184			0.0110107
Effect_size	msp_1410	-0.0397334	-0.0848448		-0.0588923	0.0151054	0.055388	-0.0927126	-0.046837	-0.0634163	-0.00876485	-0.0465087	0.0617914	-0.131731	-0.144551	0.0163302	0.0751501	0.010664	-0.0240078		0.118649	-0.0225719		0.170103	-0.0326077	0.0614745	0.0992082	0.00853703		0.0303604	-0.0169907	-0.074053	-0.0333219	0.00960329	0.00488607	-0.0547132	0.0243384	0.0132907	-0.0490777
Effect_size	msp_1412	0.0199146	0.00934311		0.0483061		-0.0299646	-0.0778936	-0.0032485	-0.127072	-0.010701	0.0105945	-0.00117809	-0.133148	0.133302	-0.043261		0.0612891	0.0445166	0.101429		0.0090839	-0.0330481		-0.0326077		0.0352121	0.107048		-0.0272448	-0.0429897	-0.0780559	0.000545844	0.0198495	0.0230088		-0.0140944	-0.0208078
Effect_size	msp_1413	0.0547215	-0.128328	0.0802764		-0.165718	-0.0113231	-0.0898279	-0.0541023	-0.0336414	0.0675499	0.00380054	-0.0654159	-0.133217	-0.0148525		0.0984855	-0.0272648		-0.00771952		-0.220321					0.0497799	0.00435978		-0.028457			-0.0235449	-0.0736883	0.0254577	-0.0725477	-0.0527133	-0.0327975	0.11403
Effect_size	msp_1414					-0.0311033																															-0.0432771
Effect_size	msp_1415					0.018959	0.156794	0.0515688		0.0390524		-0.0130441	0.0785945	0.0438905	0.0481279	0.0955572		0.158643		0.036895		0.00420579						0.0299266		0.0213302					0.0709321	0.244712	-0.0436366	0.0852407
Effect_size	msp_1416																	0.011761				0.00700965															-0.0975128
Effect_size	msp_1417
Effect_size	msp_1418c	0.0603095	-0.048845	-0.222827	0.0759003	-0.000313506	0.159886	-0.128406	-0.0472685	0.0705445	0.00183091	0.158761	-0.0397186	-0.275511	-0.298667	0.00654184	0.0120417	0.135984	-0.351018	-0.033889	-0.259272	0.0746254	0.0917168	-0.048795	-0.0479362	-0.0064146	0.0364679	0.00939119	0.00926861	0.27427	0.236125	-0.0959054	-0.104041	0.182358	1	0.146243	-0.0318631	-0.0993464	-0.185245	0.0353953
Effect_size	msp_1419		0.0213072				0.123365													0.0814785			0.0563965												0.0300401
Effect_size	msp_1420	0.136963				-0.0676536				-0.0807811			-0.000399935					0.121836			-0.166753			0.102062								-0.195656	-0.0738533	-0.0238776		0.433078	-0.085182	0.0484094	-0.0432037
Effect_size	msp_1421	0.0818082	0.0159543		0.151647	-0.106647	0.0382235	-0.0136017	-0.0893522	-0.0660543	0.118618	0.0875299	0.241058	-0.160713	-0.154763	0.0723034	0.103131	0.0630707	0.173615	0.00793094		0.170093					-0.0407151	-0.0689735	-0.057863	-0.0814637			0.0393439	0.102038	0.0477217		0.121736		-0.124254
Effect_size	msp_1422	-0.100563	0.0213072			-0.0972693	-0.00559401	0.0960941	0.0261104	0.0540408		-0.0220305	-0.0329998	-0.00617733				-0.108297		-0.0359446		-0.159514					0.0374875	0.0202733	-0.0290961					-0.0569405	-0.0440618		-0.0733526		0.126824
Effect_size	msp_1423		0.0213072				0.0230683	0.0942099		0.0569777		0.00647748		0.0422024	0.0463778					0.0187022		0.00901149				0.0691771			0.0233057					0.051755	0.109657		-0.104952		-0.001693
Effect_size	msp_1424														-0.0032018
Effect_size	msp_1425		0.0213072																												0.0692473						0.0451914
Effect_size	msp_1426																			0.0667573																	-0.0465958
Effect_size	msp_1427									0.0454081
Effect_size	msp_1428	0.0549644	-0.158255	-0.105625	0.0467493	0.151109	-0.0630886	-0.209545	-0.211907	-0.232325	-0.00976484	-0.0189991	0.0508995	-0.422067	-0.198548	-0.0590057	0.01645	-0.172865	0.0623558	-0.129254	-0.142173	-0.0480582			-0.00877577	-0.0844175	0.134411	-0.0232504	-0.120142	-0.190959	-0.170916	-0.175506	0.0463269	-0.156029	-0.101731	-0.123461	-0.119803	-0.143379	-0.0883486
Effect_size	msp_1429																	0.115534																			-0.0861676
Effect_size	msp_1430																																				-0.109459
Effect_size	msp_1431																																				-0.074628
Effect_size	msp_1432				0.0134789		0.00859449	-0.0225353		0.00115542	-0.00730792	-0.0426856		-0.00617733	0.148497					0.0101287			0.0598671				-0.00485125	-0.00372853	0.0333983	-0.0366599					0.0248567			0.0300843		1
Effect_size	msp_1433		0.0850902															0.011761				0.0678736						0.0708621
Effect_size	msp_1434									0.00115542								-0.0882259																					0.0712461
Effect_size	msp_1435	0.0174253	-0.0303061		0.0471346	0.0798319		-0.0349522		-0.0576703	-0.00683032		0.0942583	-0.00513764	-0.00380493	0.0186788		0.00882076		-0.0262758		0.0678736					-0.00513509	-0.00468527					0.0303619	-0.0168215	0.0227598		-0.0428723	0.103887
Effect_size	msp_1436		0.136961	0.057087	0.0593158		0.0552793	0.0171439			-0.00455355	0.0417703				0.0133905				0.0115513			0.0794861				0.0418785	0.00874029			0.0839208		-0.0150156	0.00551174	0.0249497		-0.00153355	-0.00118188
Effect_size	msp_1437	0.0310878	-0.0279748		-0.0364375	0.119689	0.0378962	0.109868		0.150838	-0.144328	-0.0930153	0.196368	0.289313	-0.00380493	0.160357							0.0183608				-0.00513509	0.0252756			0.0353213		-0.160458	0.104543	0.0795192		0.117247	0.242352	0.0292044
Effect_size	msp_1438															0.0949426
Effect_size	msp_1439		-0.14949					-0.0148997	0	-0.00867874				-0.0718418	-0.0567649					0.035021								0.105774		0.0499977	0.00512359						-0.0500936		0.00404078
Effect_size	msp_1440						0.0710473																					0.0600893							0.0299231		-0.0423749
Effect_size	msp_1441c	0.0257584	-0.0929653		0.113752		-0.0860462	-0.00475523		0.0747665		-0.023216	-0.0105302	-0.136637	-0.178256	-0.0308402	0.00260373			-0.0546894	-0.18254	0.107137	-0.0622964		-0.163962	-0.0587691	0.00891374	-0.0627477	0.0456255	-0.0647726		-0.193055	0.0967466	-0.069298	-0.0913841		0.0627351		0.119814
Effect_size	msp_1442								0.0600352	-0.0406781			0.0250312					0.0661277		0.035021		-0.0911162					0.0593812										-0.0481291		0.16877
Effect_size	msp_1443	-0.0647067	-0.0770806	0.111012	-0.0153099	-0.0396199	0.0637629	-0.111724		-0.0225436	-0.0510611	0.0803436	0.114112	0.0109324		0.208114		0.154866		-0.00675462		0.0678736					0.0493125	0.0144814	0.0229267		0.0658477		-0.112017	-0.0539468	0.0119731		0.0297241	0.153884	-0.0228068
Effect_size	msp_1444	0.220581	0.00793045	0.0199457	0.021985	0.224735	0.0804809	0.172815	0.116627	0.111282	0.153205	0.0211275	0.121263	0.0777382	0.220867	0.097484	0.0399133	-0.168913	0.0145065	0.0333061	0.0142434	-0.091414	-0.04091	0	-0.163962	0.0210434	0.0219713	-0.0518897	0.00860989	-0.0493545	-0.181832	-0.0653224	-0.0248563	-0.147314	-0.00693297	-0.0793613	0.00852691	0.0861825	0.289193
Effect_size	msp_1446																0.152147			0.01168		-0.046016					0.00783376		0.0169681						-0.0172563		-0.11516		0.073621
Effect_size	msp_1447							-0.024145		-0.0406781																											-0.00993299
Effect_size	msp_1448																					0.00700965															-0.0967699	0.129866
Effect_size	msp_1449									0.00115542																											-0.0670915
Effect_size	msp_1450										0.0448096							0.0661013																0.0135286			-0.0750426	0.0421399
Effect_size	msp_1451													-0.0607715	-0.0577534			0.011761		0.0189687							0.0413211			0.0327313							-0.0610072
Effect_size	msp_1452		0.129694			-0.0290298		-0.0326602	0.0576338	0.00369689	-0.00683032							0.00882076			-0.155995	0.00420579															-0.00925417
Effect_size	msp_1453	-0.0847251	-0.0981325	-0.294562	0.0547565	-0.0858907	0.160387	-0.225977	0.115738	0.0621873	0.0233554	0.077109	0.282286	-0.416276	-0.439887	0.352506	0.0922327	0.0447066	0.117783	0.0371006	0.0181879	0.174551	0.042575	-0.116311	-0.191745	-0.0980636	-0.0235242	-0.0928964		1	0.23123	0.0136658	-0.00736653	1	1	0.147749	-0.0889738	0.0186809	-0.021848	0.198718
Effect_size	msp_1454															0.0200012
Effect_size	msp_1455	0.023982	0.0359796			-0.0311033		-0.0461628		0.0780454	-0.00455355							0.0546214				-0.126011					0.0582724		0.0304234						-0.00465566		-0.105753		0.261518
Effect_size	msp_1456c						0.143117					0.118347											0.0459178							0.122958					-0.00472956
Effect_size	msp_1457	-0.00957743				-0.00891635	-0.0417172		0.00187656	-0.023796		-0.0713958	-0.0456309			0.0709482	0.0510758			0.0255628		0.00412904			0.109308		0.0619195	4.62383e-05		-0.0310689	-0.0814674	-0.0956168		0.0175499	0.0293042		0.101716	-0.00827382
Effect_size	msp_1458												0.0785945					-0.0283291				-0.0387034															-0.0105173	0.0852407
Effect_size	msp_1459	0.0174253	0.132903	0	-0.0539372	0.128993	0.0477174	0.077137	-0.0831616	-0.109504	-0.0597461	0.0159065	-0.0363678	-0.00617733	0.0481279	-0.0497423	0.0212921	-0.0747451	0.0145065	0.0168909		-0.178275	-0.075335			0.0028855	0.0402934	-0.0463857	-0.0371466	-0.05914	-0.117706				-0.0543335	0.222187	-0.0585483		0.141272
Effect_size	msp_1460		-0.00455994			0.0214869	0.0069739	-0.119181		-0.0406781			0.0362046		-0.0936012			-0.0458488		0.0198995							0.12827	-0.000358959	0.0439938								-0.0621388		0.165729
Effect_size	msp_1461	0.0557662	0.210104	-0.260204	-0.0473873	0.277157	0.132399	0.116949	0.0148042	0.0118642	-0.00165261	-0.0550366	0.206824	0.0799118	-0.152954	0.143852		0.0827848	-0.00320542	0.0592778	0.149963	0.0303152	4.84119e-05		0.153396	0.0253926	0.0233294	0.107844		-0.0315208	-0.190888	0.0660793	-0.106251	0.00201784	0.0674908	-0.0147909	-0.0559664	0.11845	0.0400437
Effect_size	msp_1462	0.0199146	-0.0303061				0.0387991	-0.00205699	0.0552324	0.0346313	0.0828231		0.150421	-0.0573953	0.067043	0.0616787		-0.150612		0.0081728		-0.108176					0.0695519								0.0299662	-0.0225055	-0.133741	0.128555	0.102426
Effect_size	msp_1463						0.0899428					-0.0202802								0.033024										0.000176052					0.0050031
Effect_size	msp_1464		0.0850902		0.0593215			0.0171439		-0.0294735		-0.00374875		0.0422024	0.0463778		0.118431			0.0265267			0.0145496			0.0978227	0.0197353		0.0912967	-0.0168928	0.0497478				0.046727		-0.088058		0.128218
Effect_size	msp_1465	0.0428668	0.0488948	0.0861147	-0.03133	0.0800278	0.0281466	-0.159545	-0.0770136	-0.191901	0.126798	-0.040116	0.0725774	-0.26698	-0.0206562	-0.0335656	0.14468	-0.153407	0.102207	0.0277626		-0.129817				0.0439486	0.0118819		-0.0341513	-0.054154	-0.0866984		0.069868	-0.0739727	-0.0288896		-0.0977661		0.0696681
Effect_size	msp_1466				0.0593345	0.018959				-0.0563213	-0.0634802	0.00380054				-0.0227057		0.160532				0.0655728					0.0593812						-0.0263989	-0.0620765		0.244712	-0.00771946	0.0381333	-0.0258477
Effect_size	msp_1467	0.0199146	-0.0279748					-0.0315143		-0.0287367			0.0437942		-0.00380493							-0.0483168								0.0498335						0.171516	-0.0202228		0
Effect_size	msp_1468	-0.0431853		0.057087		-0.094027		-0.106909	0.109779	0.0306843	0.0448096																						-0.0170177	-0.0168215	0.00367473		-0.179958		0.12543
Effect_size	msp_1469	-0.0281514	-0.0181002	0.0802764		-0.0712238		-0.149793	-0.094351	-0.0495359	0.0277189		-0.00591961	-0.264527	-0.157604			-0.0241931	0.0145065			0.0424458									-0.043569		-0.0263989	-0.0395596		0.0878661	-0.103529		0.0118943
Effect_size	msp_1471c	0.108767				-0.0105375		-0.147035	-0.09528	-0.204332	0.0448096		0.0365798	-0.160713	-0.0316045			0.0259956				0.121176															-0.105753		0.119055
Effect_size	msp_1472c						0.0479761					0.00380054	0.0538682							0.0423896			0.076152				-0.018044	0.00781397							0.0894601
Effect_size	msp_1473c	0.0596623	-0.0462561	-0.175327	0.000972637	-0.034453	0.012131	-0.0434414	-0.135824	-0.0859399	0.0457864	-0.0124356	-0.063081	-0.0424145	-0.0433781	0.0594958	-0.0287703	0.00306812	0.314878	-0.018233		-0.0277138				-0.0418746	-0.0088329	-0.0123235	-0.06204	-0.0222257	-0.171049		0.0449675	-0.0948237	-0.0293185		-0.0127282	-0.10336	-0.044239
Effect_size	msp_1474		-0.0279748						0.0616029																						0.0484963
Effect_size	msp_1475											0.00380054														0.228242			0.0716928								-0.0465958
Effect_size	msp_1476			-0.0350297	0.103352	0.0214869		-0.00205699	0.113532	0.00404704	-0.103935	-0.0133277	0.0749383	-0.0607715	-0.00380493					0.00540282								0.00351964		0.0237444			-0.113444	-0.0521421			-0.0812784
Effect_size	msp_1477	-0.240976	-0.0407116	-0.132441	-0.0127019	-0.135092	0.0991351	-0.118243	-0.0107399	0.0844756	0.00557616	0.0829084	0.288523	-0.284025	-0.229941	0.286593	0.0552167	0.109245	-0.206467	0.0880056	0.126051	0.201818	0.0118203		-0.0364509		0.0546106	-0.0492583		1	0.210877	0.0533856	0.185622	0.137832	0.158362	0.0609901	-0.0127689	0.046117	0.0816919
Effect_size	msp_1478												0.0240232																					0.00162357	0.0299231		-0.0475516	0.129866
Effect_size	msp_1479	-0.0246629	-0.0370918		-0.015343	-0.102306	-0.0499156	-0.162312	-0.0163461	0.00316997	-0.0597461	-0.0136782	0.0929998	-0.180432	-0.206544		0.00132812	-0.108297	0.0145065	-0.0551787	0.0393967	-0.156776	-0.0333009				0.127678	-0.012864	-0.0501146	0.0985081		-0.05332	0.0720514	0.0181311	0.0748654	0.0137153	0.0768171	0.0589093	-0.0459911
Effect_size	msp_1481		-0.0279748		0.0873996		0.0117407	0.141118	0.10251	0.0847454	-0.0460223	-0.00948398	0.0635599	0.0932365	0.100196			-0.0840247		-0.0179544							0.00319612	0.00361476			0.0484963		-0.0655012	-0.037039			-0.0530938	0.0344667	0.10371
Effect_size	msp_1482						0.016957									0.0675723	0.0756349												0.0904157						0.00506161
Effect_size	msp_1483	-0.0593911	0		0.0141242	-0.00762803	-0.0794316	-0.039339		-0.199394	0.0166003	0.0417526	-0.0144613	-0.133217	-0.0902745	-0.0602753	0.0401903	-0.0278109		-0.0513592	0.117851	-0.0399867			0	0.0469518	0.0207733	-0.0183578	-0.0107037	-0.105666		0.00459048	0.0701896		-0.0832792		-0.00907755	-0.0969106	-0.100131
Effect_size	msp_1484		-0.0303061		-0.0419555		0.0504818	-0.00102849		0.00337253	-0.0089319	0.0470883		0.0276842	-0.00684887	0.0380406				-0.0249111			0.054171			0.0181558	-0.0096496	-0.00911395	0.00432807	0.125887	0.0992172				0.0287497			0.0290162
Effect_size	msp_1485	0.158316	-0.0197643	-0.114062	0.0198485	0.169458	0.164491	0.174058	0.162861	0.159842	0.0142576	0.0767491	0.00180076	0.136526	0.141335	0.109777	0.0928341	0.00763975		-0.0404233		-0.0314068					0.0845264	0.00311782					-0.187624	-0.0184041	0.003449		-0.00533991	0.170093	0.170807
Effect_size	msp_1486				-0.0444928	0.0819055	0.139859	0.105564	0.00750623	0.132533	0.0490831	-0.045358	-0.0229181	-0.0120837	0.0250491	-0.00660888	0.127412	-0.0840247		0.0741151		-0.0931187					0.0413211	0.0421236			-0.0500923			-0.0357677	0.042569	0.123607	-0.0147334	0.0135294	0.146638
Effect_size	msp_1487		-0.0279748																																		0.0217447
Effect_size	msp_1488
Effect_size	msp_1489c	0.0199146	-0.0443469		0.014381		0.0226922					-0.0161201		-0.133148				0.0748059		0.15097			0.132613					0.081903		0.112401					0.155186
Effect_size	msp_1490																					0.00700965															-0.074628
Effect_size	msp_1491	0.129627	0.0142661		-0.0068901	-0.112741	0.138532	-0.0238162	0.0738165	-0.0432339	-0.0829739	0.0450002	0.0591629	-0.099714	-0.025224	-0.075229		0.0570109		0.0205971	-0.301775	-0.205896					0.034904				-0.125777	-0.28685	-0.141374	-0.0933302	-0.0165133	-0.152547	-0.148787	-0.0246798	0.041677
Effect_size	msp_1492	0.0808143	0.0328399	-0.122571	-0.00234694	0.111733	0.0163622	-0.14104	-0.0645024	0.0263503	0.0284381	0.032913	0.0109641	-0.413658	-0.204636	0.00855189	0.0550146	-0.0455623	0.0879046	-0.1149	-0.066513	-0.128309	-0.139601		-0.24935	-0.0547221	0.130771	0.0360675	-0.0953512	-0.135893	-0.350672	-0.124624	0.0582466	-0.07271	-0.0264186	-0.122586	-0.0613334	-0.137033	0.210109
Effect_size	msp_1493															0.0949426
Effect_size	msp_1494c		-0.0256436						0.248812			-0.0199148		-0.0607715	-0.000760986												0.0593812	0.0602789									-0.0762823		0.181383
Effect_size	msp_1495									0.00115542										-0.00457052							-0.0175448	0.0327829		-0.0262195					0.0427026
Effect_size	msp_1496				0.0168297				0.00750623	-0.0965257	-0.0121799	-0.0376928						0.00882076				0.00700965												-0.00856052			0.0212668	0.0191998	-0.0212864
Effect_size	msp_1497																																				-0.0105173
Effect_size	msp_1498
Effect_size	msp_1499	-0.0431853			0.0354244	-0.094027	-0.0549435					-0.00562172	-0.00742488				-0.0131214			-0.00587728						-0.0256739	-0.00295849	-0.0705226	-0.0715243	0.00759394				-0.0307677	-0.00963986				0
Effect_size	msp_1500																																				-0.0971413
Effect_size	msp_1501				0.0593345								0			0.0125407																		-0.0238776				0.286402
Effect_size	msp_1502																																				-0.0105173
Effect_size	msp_1503c								0.103953	0.0772239	-0.00683032																												0.073621
Effect_size	msp_1504																																				-0.0440201
Effect_size	msp_1505							-0.0423944																				0.105774									-0.148202
Effect_size	msp_1506																																				-0.0960269
Effect_size	msp_1507
Effect_size	msp_1508
Effect_size	msp_1509		0.0393265					-0.116889	-0.00946352	-0.118039				-0.099817	0.060741							-0.0351031					0.041168										-0.133891	0.0286602	0.0194339
Effect_size	msp_1510c	0.0798119	-0.0700021	-0.0379489		-0.0269562		-0.0761085	-0.110326	-0.211304	-0.102311			-0.0983491							0.0226705	-0.0931187			0.218706							-0.0422883	0.0292207				0.110773		-0.0147339
Effect_size	msp_1511c			0.0530094	0.135856		-0.00680656				0.0448096	0.0884894			-0.00106727	-0.0105468				-0.0519433						0.017532	0.117983		0.0252077	0.0538215			-0.0150156	-0.0468938	0.0298275	0.244712
Effect_size	msp_1512
Effect_size	msp_1513	-0.073472	0.0874214	-0.051851	0.0348437	-0.0471104		0.115528	-0.10131	-0.104116	-0.0785643	0.0222041	0.0373301	0.257509		0.0503175		0.0679899	0.200887			0.055805															0.129842		-0.129624
Effect_size	msp_1514																					0.00700965															-0.0138891
Effect_size	msp_1515	0.0884848	0.0154026	-0.06043	-0.101941	0.169664	0.12153	0.0905592	-0.0443668	-0.0446603	0.0151602	-0.118127	0.0830317	0.248292	-0.0296488	0.0663446		0.0730019	0.0445166	0.0118455	0.0575797	0.0832088	0.00604744	0.170103	0.55606	0.0318631	0.00765278	0.0982468		-0.0259695	-0.0511077	0.0722276	-0.108026	0.0181321	0.0786726	-0.0630154	0.083918	0.117663	-0.0952181
Effect_size	msp_1516				0.0168297					-0.0397321		-0.0375344				0.0498819																		0.0135286			-0.147907		0.0272575
Effect_size	msp_1517																																				-0.0960269
Effect_size	msp_1518																																				-0.0147183
Effect_size	msp_1519	0.0174253	0.13899	-0.0379489	0.00561739	0.125385	0.0812115	0.151552	-0.0272013	0.0498976	0.0537577	0.063775	0.048372	-0.00411822	0.215014	0.111093		0.0204743		0.0512612		0.043815	-0.00342768			0.0691506	-0.00429858	-0.00347996	0.00855214	0.0403526	-0.105707		-0.116298	-0.056949	0.0356911	0.101384	0.0277141	0.112313	-0.063484
Effect_size	msp_1520				0.0163142		0.0488173	0.0504228		0.0780454		-0.0413634	0.0365798	0.0822022	-0.0032018							-0.0483168						0.00361476			0.049122				0.0514947			0.149368
Effect_size	msp_1521
Effect_size	msp_1522				0.0598739		0.0296463				0.0448096		0.150421															0.0216189					-0.0170177		-0.00450786			0.0516101
Effect_size	msp_1523		0.134932	0.057087			0.179734	0.0481309			0.0448096	-0.0230421		0.112055	0.0481279					0.0546714			0.0644765						0.00743992	-0.00886044					0.0284645		-0.074628	0.0300843
Effect_size	msp_1524						0.0735302		0.221434				0.0204573			-0.00437409		-0.0410226				-0.0506176													-0.00450786		-0.0143037		0.0272575
Effect_size	msp_1525	0.0275349	0.0493673		0.0107831	0.0826789	0.0884627	0.141989	0.186689	0.184618		0.0620034	0.19607	0.0580311	-0.0457945	0.154062		0.0748059		0.0183957		0.0655728	0.0346367				0.0237708			0.0299455				-0.0095465	0.110009			0.0716374
Effect_size	msp_1526											0.0885972																							0.0142001		0.0212668
Effect_size	msp_1527						0.123235		0.0302881	0.138712			0.208174			0.0410436	0.0419369	-0.0931054		0.0698888		-0.114854	0.00563394				0.0554389	-0.01761	-0.00910058	0.0383822	-0.0267925			-0.0421392	0.110523		-0.101858
Effect_size	msp_1528		0.0874214	0.0530094	0.0344013			0.0761085		0.0325629	-0.00683032			-0.00617733	-0.0032018				0.0145065														-0.0170177		0.0593257		0.0217447		0
Effect_size	msp_1529	0.0293113	-0.129694			0.247031		-0.0547493	-0.0231191	-0.0909963	-0.0597461	0.00357698		-0.0459485	-0.159775	0.0283517		-0.0804947	0.0158595			-0.052877						0.0600893						0.0627158		0.318327	0.0637714	0.0195252	-0.0702086
Effect_size	msp_1530c	-0.0306279	0.0431886		-0.00837548	0.0279635	0.0725216	-0.0480578		0.0325629	-0.0827825	-0.0209929	-0.00891017	0.0442469	0.0538032	-0.0280463	0.0706753	-0.0283291		-0.0473409	-0.0969764	-0.0911162				-0.00277998	-0.0398844	-0.0283185		-0.0530559		-0.00110298	0.165925	-0.0197302	-0.072574			0.264103	-0.001693
Effect_size	msp_1531c	0.128337	0.139695	-0.0726693	-0.00703559	0.0323823	0.100325	0.0676265	-0.000483007	-0.0279515	0.0290566	0.00542996	0.111693	-0.207857	-0.0140038		0.0580981	-0.0281768	0	-0.0361434		-0.0392013	-0.0227741				-0.0487107	-0.0469656	-0.0373664		-0.0718057		-0.0679888	0.0581954	-0.0124882	-0.0533902	0.069125		0.077556
Effect_size	msp_1532																																				-0.00993299
Effect_size	msp_1533	-0.0952465	-0.0752359	-0.0541588	-0.0364414	-0.0479993	-0.0721477	-0.295736	-0.0655242	-0.221779	0.052019	-0.017967	-0.0114704	-0.322721	-0.206037	-0.0405138	0.0723654	-0.0283573	0	-0.109126	-0.0130946	-0.0356171	-0.138546		-0.0364509	-0.0494426	0.164447	-0.0132035	-0.0980598	-0.116694	-0.120052	0.008993	-0.00144957	-0.165141	-0.119713	0.038049	-0.121967	-0.135503	-0.0139399
Effect_size	msp_1535	0.0199146											0.0538682																					0.140507			-0.074628
Effect_size	msp_1536
Effect_size	msp_1538	-0.0436897	0.0640855		0.00411113	0.0631176		0.0478365	0.079689	0.0224141	0.162008	-0.0285657	0.113932	-0.083896	0.0523915	0.0133584	0.255995	0.0380196		0.0269071	0.0243401	-0.186331			-0.133962			0.0216189			-0.154293	-0.155467	0.108396		0.0203502	0.118074	-0.0262306	-0.0476689	0.215403
Effect_size	msp_1539
Effect_size	msp_1540																																				-0.0105173
Effect_size	msp_1541	0.0452463	0.0978502	-0.0367396	-0.00100073	0.148872	0.180407	0.0132279	0.0542443	0.0842703	0.0628009	-0.0654238	0.260206	-0.0104361	0.218853	0.174959	0.0904136	-0.0277	0.190956	0.0349387	-0.0998679	0.0487285		-0.19518	0	-0.0324443	0.0638683	-0.0156877	-0.0491092	-0.0651785	-0.104749	-0.139622	-0.114355	-0.0845562	0.0384347	-0.0737628	0.0182442	0.200512	0.204789
Effect_size	msp_1542							0.0481309	0.103953	0.0788669				-0.00617733	-0.0032018							-0.120611															-0.074628
Effect_size	msp_1543	0.00822359	-0.0356648	-0.189499	0.0692352	-0.0134888	0.195188	-0.0590127	0.0673742	0.144375	0.0525631	0.144702	0.108883	-0.321789	-0.341214	0.0607451	-0.0350885	0.160871	-0.230037	-0.0259928	-0.0907222	0.110805	0.0720972	-0.048795	-0.0371914	0.00770952	0.0915381	-0.0361443	-0.0188353	1	0.285195	-0.00973506	-0.0765509	0.259606	1	0.210271	-0.0621718	-0.121922	-0.107626	0.0866897
Effect_size	msp_1545	0.0718307	0.0215037		-0.0539836	0.118203	0.149356	0.118101	0.166189	0.0560141	0.00856364	-0.0250837	0.0201987	0.0490494	0.121462	0.0192519		-0.0164807		-0.0126515	-0.352437	-0.0987393			-0.099668		0.00783376	0.00874029			-0.132007	-0.364178	-0.108475	-0.0893697		0.100287	-0.00407635	0.0332786	0.057202
Effect_size	msp_1546						0.00321273			0.00115542		-0.0200975								-0.0261605						0.0454886				-0.0132432				-0.0610553	-0.0120207			0.0691573
Effect_size	msp_1547c
Effect_size	msp_1548	-0.0657285	0.00627707			-0.00567404	0.0514982	0.0270587	0.0302881	0.202624	-0.00683032		0.138717	-0.184124	-0.0547422	0.255884		-0.119054		0.0497179		0.0126435												-0.0700534	0.0426516			0.0584542	0.0714613
Effect_size	msp_1549									0.00231084	-0.100687							-0.122759																			-0.0861238		0.073621
Effect_size	msp_1550	0.0199146	-0.0279748		0.0468423		0.0230683	0.0759888	0.0281993	0.0821922		-0.0295094			0.039643			0.0693535		0.0185647		0.057632					0.133344		0.0231794	0.00612896	-0.00126232			-0.0240757	0.0509759		-0.0645237		0.128218
Effect_size	msp_1551	0.0796325				0.0819055		0.00205699	0.00562967	-0.0225436		0.00357698		-0.0607715				-0.0207747				-0.0931187												-0.0161867	0.0303357		-0.0795532	0.010709
Effect_size	msp_1552						0.0392591			-0.0387861																	0.0293086			0.0871832							-0.109245
Effect_size	msp_1553	0.152037	-0.00210398	0.0883501	0.0344013	0.103584		-0.0366744	-0.0958589	-0.0586183	0.226336	0.00562224	-0.0120733	-0.200273	-0.269406	-0.000416512		-0.107384	-0.102388	-0.0454246		-0.0863373					0.0776708		-0.00166285		-0.102894		-0.104067	-0.0368614	-0.0387246	-0.0459591	-0.0623955	-0.00810732	-0.0435792
Effect_size	msp_1554c						0.0150638					-0.00948398								0.00253034			0.0960048			0.0507845	0.0183771	-0.038712	-0.0298626	0.036082					0.0247603
Effect_size	msp_1555c																																				-0.0975128		0.073621
Effect_size	msp_1556	-0.0357243	0.0198224	0.122474	0.0489717	0.213799	0.0266803	0.0144092	-0.0828373	-0.100631	0.144937	0.150666	0.117168	-0.0808997	0.11539	0.0292753	0.0422141	-0.045627	0.098032	0.0168559	-0.0626474	0.0214111	-0.204142	-0.146385	-0.21927	-0.0702442	0.0755373	-0.0219332	-0.190221	-0.164886	-0.134821	0.00890172	0.0969908	-0.0242736	0.15047	0.00163774	0.0429537	-0.0235058	-0.111603
Effect_size	msp_1557	0.073427			0.0370385			0.0197814	0.0616029	-0.0795287		-0.0130296								0.035021																	0.0109586		-0.0418101
Effect_size	msp_1558	0.0406486	-0.104809	-0.308058	-0.0161181	0.121496	0.269162	-0.0638293	0.0123907	0.102517	0.0935602	0.037146	0.155946	-0.272166	-0.387731	0.304201	-0.00597562	0.125929	0.202055	0.0310873	0.0315127	0.233473	-0.0799625		-0.0628335	-0.0452472	0.0111974	-0.0744986	-0.101347	-0.11255	-0.198948	0.0489569	0.0651673	0.135481	0.156072	-0.114111	0.0486475	-0.0585536	0.0449444
Effect_size	msp_1559c						0.0229429					-0.0376928	0.00583584			0.0707543				0.0783087							0.013877				-0.00294541			-0.0166099	0.0120356			0.0110107
Effect_size	msp_1560																	-0.0458488		-0.0125828		-0.046016													0.00535419		-0.0105173
Effect_size	msp_1561																																						0.149916
Effect_size	msp_1562	-0.174054	-0.0700021	-0.0202349	0.00907408	-0.0696709	0.150519	0.0365279	0.0942927	-0.00887852	0.0369083	0.0419103	0.0847522	0.229087	0.112049	0.0113021		0.0630707		-0.0114477		-0.0512941	-0.0232093				0.0867185	0.0259679	-0.0367251	-0.0405399	0.0495896		-0.138098	0.0106612	0.00851136		-0.201447	0.129764	0.0351189
Effect_size	msp_1564	0.223631	-0.104507	0.0377042	0.0502865	0.0305947	0.0062339	-0.0987647	-0.0986239	-0.0746796	0.165599	0.0221182	-0.0165872	-0.306856	-0.17818	-0.0827341	-0.0103609	-0.166389	0.100833	-0.0658221	0.147631	-0.102751			0	0.0118597	0.127353	-0.0518683	-0.0637661	-0.10383	-0.220699	-0.0548708	-0.00417481	-0.12064	-0.0640734	-0.0269572	-0.0778332	-0.102452	0.111425
Effect_size	msp_1565	0.0174253
Effect_size	msp_1566																																				-0.0155475
Effect_size	msp_1567	0.145163	0.0228202		0.00883687	0.0741262	0.0103924	-0.0250442	0.0834389	0.0170618	-0.00455355	-0.0364231	0.120275	-0.099888	-0.101549	0.0968239	0.0338274	-0.176233	0	-0.000921833	0.0226705	-0.227521			-0.0326077		0.116216	-0.0251307	0.010618	0.0253212		-0.00806322	0.163533		0.0164422		0.00732444	0.0293723
Effect_size	msp_1568				0.0344013							-0.0200975																										0.0716477	0.0272575
Effect_size	msp_1570	0.0199146				0.285022	0.149193	0.2506	0.342416	0.268849		0.10904	0.269277		-0.0032018	0.0888219				0.0487095							-0.00521927		0.00416887					-0.0373943	0.0382737			0.0339829
Effect_size	msp_1571c	0.0174253										0.0417797			0.0890353	0.0186788				0.0449113							0.0027261					-0.195656			0.093186
Effect_size	msp_1572	-0.00136161		0.140698		-0.0453481	0.0985819				0.084447	-0.00948398	0.282379			0.164522	0.00496007	-0.0177416		0.077826		-0.0276633	-0.0302451			-0.00399555	-0.0585136	-0.0567966	-0.0475338	-0.0525981	-0.0160406		-0.0150156	0.107256	0.0170216	0.0811072	0.0207889	0.181041
Effect_size	msp_1573																																				-0.0420599
Effect_size	msp_1574							0.0504228	0.0600352	0.036105		-0.0199148		0.0836701	-0.00106727			0.00882076				0.00420579															0.00204786	0.100222	0.0292044
Effect_size	msp_1575		0.274504					0.077137	0.0240216	0.0319367	-0.00683032			-0.00411822			0.100481	-0.0321063		-0.0401682	-0.155995	0.00743228					0.0753476	0.0337292	-0.00810326			-0.189445	-0.0150156		0.00272257		-0.0471694		0.0699409
Effect_size	msp_1576			0			-0.0111636					-0.02999								-0.00771952									-0.0111676	-0.00699486				0.119761	-0.000725549
Effect_size	msp_1577		0.0213072				0.0513212	0.0171439		0.0444621				0.0792664				0.00882076										0.0850156									-0.0475516
Effect_size	msp_1578c											0.0768229					0.052742			-0.030289							-0.00899506			0.0322818					-0.0351874		-0.0465958
Effect_size	msp_1579c	-0.133069	0.156826			-0.0913527		-0.0600835	-0.146063	-0.0569914		-0.0285657	0.0673412	-0.17458	-0.195568		0.0540994	-0.198818	0.114231	-0.00924177		-0.0950002				0.0403065	0.134156	-0.00772083	0	-0.016752	-0.0153268			-0.137294	-0.0162073		-0.167856	-0.105627	-0.0473419
Effect_size	msp_1580c		0.0839029		0.00451345		-0.00194161	-0.0791255		0.00231084		-0.0263092	-0.0239066	-0.0573953	0.096701		0.0723927	-0.0951594		0.0350487		0.0176257					0.129115	-0.0129092	0.10497	-0.0444104	-0.0515656			-0.0728176			-0.117828	-0.0866643
Effect_size	msp_1581	-0.100449	0.0980863	-0.126977	-0.0271025	0.249774	0.0989686	0.230333	0.0606861	0.0455795	-0.0639858	0.0393983	0.017996	0.214141	0.162968	0.0461752	0.0129345	0.0511867	0.179741	0.000124916	0.091662	-0.0324715		0.170103	0.109308	0.00208508	0.00555668	0.0264435	-0.0156853	-0.0416175	-0.0281222	0.036477	-0.281093	-0.150853	0.00735072	0.0124877	0.0237095	0.195294	0.11684
Effect_size	msp_1582							-0.0225353				-0.0418976	-0.0135078		-0.00106727	0.000416512	0.0124102			-0.0166216		0.00700965	-0.0240227			0.000302912	-0.0514814	-0.0506273	0.0227102					-0.0373943	-0.0613167
Effect_size	msp_1583															0.0685771																					-0.0465958
Effect_size	msp_1584	-0.060352	0.0454411	-0.106877	-0.0832856	0.070913	-0.0186827	0.158928	-0.0431582	-0.0624161	-0.0730266	-0.0614406	0.0746773	0.347227	0.0878147	0.086042	0.0011654	0.020858	0.150623	0.0238085	0.00785674	-0.193024			0.111635		0.0241489	0.0706016	0.000543648	-0.0642056	-0.0579372	-0.0147865	-0.162081	-0.035414	-0.0261532	0.0938289	-0.0736035	0.266112	0.116473
Effect_size	msp_1586									0.00115542
Effect_size	msp_1587				-0.00279536		0.100525		0.237611	0.135317	-0.0736247	0.0410064	0.119706			0.191516		0.0884194				0.0151715						0.0421236					-0.135915	0.00112401			-0.0605505	0.207374	0.177496
Effect_size	msp_1588	0.0174253			0.0136106			0.028734		0.0313105	-0.102311	-0.0296055	-0.0190577	0.0316391	-0.000760986	0.0790916		-0.0264405				-0.0871111					0.0291759	0.0299266		0.0215627	0.0123623		-0.112017	0.0135241	0.00359215	0.131098	0.00393819	0.100184	-0.001693
[truncated: 2,411 more rows]

## Sheet: README
Supplemental Table S5. Statistics of pan-metagenomics association study (pan-MGAS) results for 23 diseases. We performed pan-MGAS analysis and identified the enriched or depleted species in each cohort with effect sizes and P-values for each column. The negative sign in the effect size values indicated that the species was depleted in disease, positive effect size values, and species richness.
