# Supplementary material for: Global compositional and functional states of the human gut microbiome in health and disease
Source: Genome Res. 2024 Jun;34(6):967–78. doi: 10.1101/gr.278637.123 (PMC11293553; doi:10.1101/gr.278637.123)
Supplement: Supplement 6 [file Supplemental_Table_S6.xlsx]

## Sheet: Table S6
msp	category	disease	country	effect_size_gt0.3_count	direction
msp_0005	Cancer	CRC	ITA	1	enriched
msp_0005	IBD	CD	ESP	1	enriched
msp_0005	IBD	UC	ESP	1	enriched
msp_0005	Liver	NAFLD	ESP	1	enriched
msp_0005	Liver	NAFLD	USA	1	enriched
msp_0009	Cancer	CRC	GER	1	enriched
msp_0009	Cancer	CRC	USA	1	enriched
msp_0009	Cancer	NSCLC	FRA	1	enriched
msp_0009	Cancer	RCC	FRA	1	enriched
msp_0009	Hyperglycaemia	IGT	SWE	1	enriched
msp_0009	IBD	CD	ESP	1	enriched
msp_0009	Liver	LC	GBR	1	enriched
msp_0009	Obesity-CVD	ACVD	CHN	1	enriched
msp_0015	Hyperglycaemia	T1D	LUX	1	depleted
msp_0015	IBD	CD	CHN	1	depleted
msp_0015	IBD	CD	ESP	1	depleted
msp_0020	Cancer	NSCLC	FRA	1	enriched
msp_0020	Cancer	melanoma	USA	1	enriched
msp_0020	Hyperglycaemia	IGT	SWE	1	enriched
msp_0020	Hyperglycaemia	T2D	SWE	1	enriched
msp_0020	IBD	CD	ESP	1	enriched
msp_0020	Liver	LC	GBR	1	enriched
msp_0021	Hyperglycaemia	T1D	LUX	1	depleted
msp_0021	IBD	CD	ESP	1	depleted
msp_0021	IBD	UC	ESP	1	depleted
msp_0024	Cancer	NSCLC	FRA	1	enriched
msp_0024	IBD	CD	ESP	1	enriched
msp_0024	Liver	LC	GBR	1	enriched
msp_0024	Obesity-CVD	ACVD	CHN	1	enriched
msp_0025	Adenoma	adenoma	ITA	1	depleted
msp_0025	Hyperglycaemia	T2D	ESP	1	depleted
msp_0025	IBD	UC	ESP	1	depleted
msp_0031	IBD	CD	ESP	1	enriched
msp_0031	Liver	NAFLD	ESP	1	enriched
msp_0031	Liver	NAFLD	ITA	1	enriched
msp_0034	Cancer	NSCLC	FRA	1	depleted
msp_0034	Hyperglycaemia	IGT	SWE	1	depleted
msp_0034	Liver	LC	GBR	1	depleted
msp_0040	Hyperglycaemia	T2D	ESP	1	depleted
msp_0040	IBD	CD	ESP	1	depleted
msp_0040	IBD	UC	ESP	1	depleted
msp_0044	Cancer	CRC	GER	1	enriched
msp_0044	Cancer	CRC	USA	1	enriched
msp_0044	Hyperglycaemia	T1D	LUX	1	enriched
msp_0044	IBD	CD	ESP	1	enriched
msp_0044	IBD	UC	ESP	1	enriched
msp_0045	Adenoma	adenoma	FRA	1	depleted
msp_0045	Adenoma	adenoma	ITA	1	depleted
msp_0045	Cancer	NSCLC	FRA	1	depleted
msp_0045	Cancer	RCC	FRA	1	depleted
msp_0045	IBD	CD	ESP	1	depleted
msp_0045	Liver	LC	GBR	1	depleted
msp_0048	Hyperglycaemia	IGT	SWE	1	depleted
msp_0048	Hyperglycaemia	T2D	SWE	1	depleted
msp_0048	IBD	UC	ESP	1	depleted
msp_0049	Adenoma	adenoma	FRA	1	enriched
msp_0049	Cancer	CRC	FRA	1	enriched
msp_0049	Cancer	CRC	GER	1	enriched
msp_0049	Cancer	CRC	USA	1	enriched
msp_0049	Cancer	RCC	FRA	1	enriched
msp_0050	Adenoma	adenoma	ITA	1	depleted
msp_0050	Cancer	NSCLC	FRA	1	depleted
msp_0050	Cancer	RCC	FRA	1	depleted
msp_0050	IBD	CD	ESP	1	depleted
msp_0050	Liver	LC	GBR	1	depleted
msp_0052	Cancer	melanoma	USA	1	enriched
msp_0052	Hyperglycaemia	IGT	SWE	1	enriched
msp_0052	IBD	CD	ESP	1	enriched
msp_0052	Obesity-CVD	ACVD	CHN	1	enriched
msp_0056	Cancer	CRC	GER	1	enriched
msp_0056	Cancer	CRC	USA	1	enriched
msp_0056	Cancer	NSCLC	FRA	1	enriched
msp_0056	Hyperglycaemia	IGT	SWE	1	enriched
msp_0056	Hyperglycaemia	T2D	SWE	1	enriched
msp_0056	IBD	CD	ESP	1	enriched
msp_0056	Liver	LC	GBR	1	enriched
msp_0062	Cancer	RCC	FRA	1	enriched
msp_0062	Hyperglycaemia	T1D	LUX	1	enriched
msp_0062	Hyperglycaemia	IGT	SWE	1	depleted
msp_0062	IBD	CD	ESP	1	depleted
msp_0062	Liver	NAFLD	ITA	1	enriched
msp_0062	Liver	NAFLD	USA	1	depleted
msp_0068	Cancer	NSCLC	FRA	1	depleted
msp_0068	IBD	CD	ESP	1	depleted
msp_0068	IBD	UC	ESP	1	depleted
msp_0069	Cancer	CRC	AUT	1	enriched
msp_0069	Cancer	NSCLC	FRA	1	enriched
msp_0069	Cancer	RCC	FRA	1	enriched
msp_0069	IBD	CD	ESP	1	enriched
msp_0075	IBD	CD	CHN	1	depleted
msp_0075	IBD	CD	ESP	1	depleted
msp_0075	IBD	UC	ESP	1	depleted
msp_0076	Adenoma	adenoma	ITA	1	depleted
msp_0076	Cancer	melanoma	USA	1	enriched
msp_0076	Cancer	CRC	FRA	1	depleted
msp_0076	Cancer	NSCLC	FRA	1	depleted
msp_0076	Cancer	RCC	FRA	1	depleted
msp_0076	Hyperglycaemia	T2D	SWE	1	enriched
msp_0076	IBD	CD	ESP	1	enriched
msp_0076	IBD	UC	ESP	1	depleted
msp_0076	Inflammatory	VKH	CHN	1	depleted
msp_0079	Adenoma	adenoma	ITA	1	depleted
msp_0079	Cancer	NSCLC	FRA	1	depleted
msp_0079	IBD	CD	ESP	1	depleted
msp_0086	Cancer	CRC	FRA	1	enriched
msp_0086	Cancer	CRC	GER	1	enriched
msp_0086	Cancer	CRC	USA	1	enriched
msp_0086	Cancer	NSCLC	FRA	1	enriched
msp_0086	Cancer	RCC	FRA	1	enriched
msp_0086	Cancer	melanoma	USA	1	enriched
msp_0086	IBD	CD	ESP	1	enriched
msp_0086	Liver	LC	GBR	1	enriched
msp_0087	Hyperglycaemia	T1D	LUX	1	depleted
msp_0087	IBD	CD	ESP	1	depleted
msp_0087	IBD	UC	ESP	1	depleted
msp_0090	IBD	CD	ESP	1	depleted
msp_0090	IBD	UC	ESP	1	depleted
msp_0090	Liver	NAFLD	USA	1	depleted
msp_0103	Cancer	melanoma	USA	1	enriched
msp_0103	IBD	CD	ESP	1	enriched
msp_0103	Obesity-CVD	ACVD	CHN	1	enriched
msp_0107	Adenoma	adenoma	ITA	1	depleted
msp_0107	Cancer	CRC	AUT	1	depleted
msp_0107	Cancer	CRC	FRA	1	depleted
msp_0107	Cancer	NSCLC	FRA	1	depleted
msp_0107	Cancer	RCC	FRA	1	depleted
msp_0107	IBD	CD	ESP	1	depleted
msp_0107	IBD	UC	ESP	1	depleted
msp_0107	Inflammatory	VKH	CHN	1	depleted
msp_0126	Cancer	CRC	AUT	1	enriched
msp_0126	Cancer	CRC	GER	1	enriched
msp_0126	IBD	CD	ESP	1	enriched
msp_0141	Adenoma	adenoma	ITA	1	depleted
msp_0141	Cancer	NSCLC	FRA	1	depleted
msp_0141	Cancer	RCC	FRA	1	depleted
msp_0142	Cancer	NSCLC	FRA	1	depleted
msp_0142	Cancer	RCC	FRA	1	depleted
msp_0142	IBD	CD	ESP	1	depleted
msp_0142	Liver	LC	GBR	1	depleted
msp_0144	Cancer	NSCLC	FRA	1	depleted
msp_0144	IBD	UC	ESP	1	depleted
msp_0144	Liver	NAFLD	ESP	1	depleted
msp_0147	Cancer	melanoma	USA	1	enriched
msp_0147	Obesity-CVD	atherosclerosis	SWE	1	enriched
msp_0147	Others	ME/CFS	USA	1	enriched
msp_0148c	IBD	UC	ESP	1	enriched
msp_0148c	Liver	LC	CHN	1	enriched
msp_0148c	Liver	LC	GBR	1	enriched
msp_0152	Cancer	NSCLC	FRA	1	depleted
msp_0152	Cancer	RCC	FRA	1	depleted
msp_0152	IBD	CD	ESP	1	depleted
msp_0152	IBD	UC	ESP	1	depleted
msp_0152	Liver	LC	GBR	1	depleted
msp_0153	Cancer	CRC	GER	1	enriched
msp_0153	Cancer	melanoma	USA	1	enriched
msp_0153	IBD	CD	ESP	1	enriched
msp_0153	Liver	NAFLD	USA	1	enriched
msp_0153	Obesity-CVD	ACVD	CHN	1	enriched
msp_0154	Cancer	NSCLC	FRA	1	depleted
msp_0154	IBD	CD	ESP	1	depleted
msp_0154	IBD	UC	ESP	1	depleted
msp_0164	Cancer	CRC	GER	1	depleted
msp_0164	Cancer	NSCLC	FRA	1	depleted
msp_0164	IBD	UC	ESP	1	depleted
msp_0172	Cancer	CRC	GER	1	enriched
msp_0172	Cancer	NSCLC	FRA	1	enriched
msp_0172	Cancer	RCC	FRA	1	enriched
msp_0172	Obesity-CVD	ACVD	CHN	1	enriched
msp_0172	Others	PD	GER	1	enriched
msp_0180	Cancer	CRC	USA	1	enriched
msp_0180	Cancer	melanoma	USA	1	enriched
msp_0180	Hyperglycaemia	IGT	SWE	1	enriched
msp_0180	Hyperglycaemia	T2D	SWE	1	enriched
msp_0188	Adenoma	adenoma	ITA	1	depleted
msp_0188	Cancer	NSCLC	FRA	1	depleted
msp_0188	Cancer	RCC	FRA	1	depleted
msp_0188	IBD	CD	ESP	1	depleted
msp_0188	Inflammatory	VKH	CHN	1	depleted
msp_0188	Liver	LC	GBR	1	depleted
msp_0199	Adenoma	adenoma	ITA	1	enriched
msp_0199	Inflammatory	VKH	CHN	1	enriched
msp_0199	Liver	NAFLD	ITA	1	enriched
msp_0200	Cancer	melanoma	USA	1	enriched
msp_0200	Hyperglycaemia	IGT	SWE	1	enriched
msp_0200	IBD	CD	ESP	1	enriched
msp_0200	Liver	LC	GBR	1	enriched
msp_0200	Obesity-CVD	atherosclerosis	SWE	1	enriched
msp_0206	Cancer	NSCLC	FRA	1	depleted
msp_0206	Cancer	RCC	FRA	1	depleted
msp_0206	IBD	UC	ESP	1	depleted
msp_0208	Adenoma	adenoma	ITA	1	depleted
msp_0208	Cancer	NSCLC	FRA	1	depleted
msp_0208	Cancer	RCC	FRA	1	depleted
msp_0208	IBD	CD	CHN	1	depleted
msp_0208	IBD	CD	ESP	1	depleted
msp_0208	Inflammatory	VKH	CHN	1	depleted
msp_0213	Cancer	CRC	FRA	1	enriched
msp_0213	Cancer	NSCLC	FRA	1	enriched
msp_0213	Hyperglycaemia	IGT	SWE	1	enriched
msp_0213	IBD	CD	ESP	1	enriched
msp_0213	IBD	UC	ESP	1	enriched
msp_0213	Liver	NAFLD	ESP	1	enriched
msp_0227	Cancer	NSCLC	FRA	1	depleted
msp_0227	Hyperglycaemia	IGT	SWE	1	depleted
msp_0227	Hyperglycaemia	T2D	ESP	1	depleted
msp_0227	IBD	UC	ESP	1	depleted
msp_0259	Adenoma	adenoma	ITA	1	depleted
msp_0259	Cancer	NSCLC	FRA	1	depleted
msp_0259	Cancer	RCC	FRA	1	depleted
msp_0259	IBD	CD	ESP	1	depleted
msp_0259	Liver	LC	CHN	1	depleted
msp_0259	Liver	LC	GBR	1	depleted
msp_0296	Adenoma	adenoma	ITA	1	depleted
msp_0296	IBD	UC	ESP	1	depleted
msp_0296	Liver	LC	GBR	1	depleted
msp_0299	Adenoma	adenoma	ITA	1	depleted
msp_0299	Cancer	NSCLC	FRA	1	depleted
msp_0299	Cancer	RCC	FRA	1	depleted
msp_0305	Hyperglycaemia	T2D	ESP	1	depleted
msp_0305	IBD	UC	ESP	1	depleted
msp_0305	Liver	NAFLD	ESP	1	depleted
msp_0306	Cancer	NSCLC	FRA	1	depleted
msp_0306	IBD	UC	ESP	1	depleted
msp_0306	Liver	LC	GBR	1	depleted
msp_0307	Cancer	NSCLC	FRA	1	depleted
msp_0307	IBD	UC	ESP	1	depleted
msp_0307	Liver	LC	GBR	1	depleted
msp_0331	Cancer	CRC	AUT	1	enriched
msp_0331	Cancer	NSCLC	FRA	1	enriched
msp_0331	Cancer	RCC	FRA	1	enriched
msp_0331	Hyperglycaemia	T2D	ESP	1	enriched
msp_0331	IBD	UC	ESP	1	enriched
msp_0331	Liver	NAFLD	ESP	1	enriched
msp_0346	Adenoma	adenoma	ITA	1	depleted
msp_0346	IBD	CD	ESP	1	depleted
msp_0346	IBD	UC	ESP	1	depleted
msp_0360	Cancer	CRC	USA	1	enriched
msp_0360	Cancer	NSCLC	FRA	1	enriched
msp_0360	Cancer	RCC	FRA	1	enriched
msp_0360	Cancer	melanoma	USA	1	enriched
msp_0360	Others	ME/CFS	USA	1	enriched
msp_0374	Cancer	NSCLC	FRA	1	depleted
msp_0374	IBD	CD	ESP	1	depleted
msp_0374	IBD	UC	ESP	1	depleted
msp_0380	Adenoma	adenoma	ITA	1	depleted
msp_0380	Cancer	CRC	FRA	1	depleted
msp_0380	Cancer	NSCLC	FRA	1	depleted
msp_0380	Cancer	RCC	FRA	1	depleted
msp_0380	IBD	CD	ESP	1	depleted
msp_0380	Inflammatory	VKH	CHN	1	depleted
msp_0396	IBD	CD	ESP	1	depleted
msp_0396	IBD	UC	ESP	1	depleted
msp_0396	Liver	LC	GBR	1	depleted
msp_0398	Cancer	NSCLC	FRA	1	depleted
msp_0398	IBD	UC	ESP	1	depleted
msp_0398	Liver	LC	GBR	1	depleted
msp_0422	Adenoma	adenoma	ITA	1	depleted
msp_0422	Cancer	CRC	FRA	1	depleted
msp_0422	Cancer	NSCLC	FRA	1	depleted
msp_0422	Cancer	RCC	FRA	1	depleted
msp_0422	Inflammatory	VKH	CHN	1	depleted
msp_0422	Liver	LC	GBR	1	depleted
msp_0436	Adenoma	adenoma	ITA	1	depleted
msp_0436	Cancer	NSCLC	FRA	1	depleted
msp_0436	Cancer	RCC	FRA	1	depleted
msp_0436	IBD	CD	CHN	1	depleted
msp_0436	IBD	CD	ESP	1	depleted
msp_0436	Liver	LC	GBR	1	depleted
msp_0442	IBD	CD	ESP	1	depleted
msp_0442	IBD	UC	ESP	1	depleted
msp_0442	Liver	LC	GBR	1	depleted
msp_0457	Cancer	NSCLC	FRA	1	depleted
msp_0457	Hyperglycaemia	IGT	SWE	1	depleted
msp_0457	IBD	CD	ESP	1	depleted
msp_0468	Adenoma	adenoma	ITA	1	depleted
msp_0468	Cancer	NSCLC	FRA	1	depleted
msp_0468	IBD	UC	ESP	1	depleted
msp_0468	Inflammatory	VKH	CHN	1	depleted
msp_0478	Cancer	CRC	AUT	1	enriched
msp_0478	Cancer	CRC	FRA	1	enriched
msp_0478	Cancer	NSCLC	FRA	1	enriched
msp_0478	Cancer	RCC	FRA	1	enriched
msp_0478	Hyperglycaemia	T2D	ESP	1	enriched
msp_0478	IBD	UC	ESP	1	enriched
msp_0484	Cancer	CRC	GER	1	depleted
msp_0484	Cancer	NSCLC	FRA	1	depleted
msp_0484	IBD	CD	CHN	1	depleted
msp_0484	IBD	CD	ESP	1	depleted
msp_0506	Adenoma	adenoma	ITA	1	depleted
msp_0506	Cancer	NSCLC	FRA	1	depleted
msp_0506	Cancer	RCC	FRA	1	depleted
msp_0506	IBD	CD	ESP	1	depleted
msp_0506	Inflammatory	VKH	CHN	1	depleted
msp_0506	Liver	LC	GBR	1	depleted
msp_0509	Adenoma	adenoma	ITA	1	depleted
msp_0509	IBD	CD	ESP	1	depleted
msp_0509	IBD	UC	ESP	1	depleted
msp_0530	Cancer	NSCLC	FRA	1	depleted
msp_0530	Cancer	RCC	FRA	1	depleted
msp_0530	IBD	UC	ESP	1	depleted
msp_0563	Cancer	NSCLC	FRA	1	depleted
msp_0563	IBD	CD	ESP	1	depleted
msp_0563	Liver	LC	GBR	1	depleted
msp_0570	Cancer	melanoma	USA	1	enriched
msp_0570	Liver	LC	CHN	1	enriched
msp_0570	Obesity-CVD	ACVD	CHN	1	enriched
msp_0572	Adenoma	adenoma	ITA	1	depleted
msp_0572	Cancer	NSCLC	FRA	1	depleted
msp_0572	IBD	CD	CHN	1	depleted
msp_0572	IBD	CD	ESP	1	depleted
msp_0573	Cancer	melanoma	USA	1	enriched
msp_0573	Hyperglycaemia	IGT	SWE	1	enriched
msp_0573	Obesity-CVD	ACVD	CHN	1	enriched
msp_0602c	Liver	NAFLD	USA	1	enriched
msp_0602c	Obesity-CVD	ACVD	CHN	1	enriched
msp_0602c	Obesity-CVD	atherosclerosis	SWE	1	enriched
msp_0604	Adenoma	adenoma	ITA	1	depleted
msp_0604	Cancer	NSCLC	FRA	1	depleted
msp_0604	Cancer	RCC	FRA	1	depleted
msp_0604	IBD	UC	ESP	1	depleted
msp_0610	Cancer	CRC	AUT	1	enriched
msp_0610	Cancer	CRC	CHN	1	enriched
msp_0610	Cancer	CRC	FRA	1	enriched
msp_0610	Cancer	CRC	GER	2	enriched
msp_0610	Cancer	CRC	USA	1	enriched
msp_0610	Liver	LC	CHN	1	enriched
msp_0610	Liver	LC	GBR	1	enriched
msp_0610	Others	acute diarrhea	USA	1	enriched
msp_0621	Adenoma	adenoma	ITA	1	depleted
msp_0621	Cancer	RCC	FRA	1	depleted
msp_0621	Inflammatory	VKH	CHN	1	depleted
msp_0647	Hyperglycaemia	T2D	ESP	1	depleted
msp_0647	IBD	UC	ESP	1	depleted
msp_0647	Liver	NAFLD	ESP	1	depleted
msp_0655	Adenoma	adenoma	ITA	1	depleted
msp_0655	Cancer	NSCLC	FRA	1	depleted
msp_0655	Cancer	RCC	FRA	1	depleted
msp_0655	Liver	LC	GBR	1	depleted
msp_0663	Hyperglycaemia	T2D	ESP	1	depleted
msp_0663	IBD	UC	ESP	1	depleted
msp_0663	Liver	NAFLD	ESP	1	depleted
msp_0665	Hyperglycaemia	T2D	ESP	1	depleted
msp_0665	IBD	UC	ESP	1	depleted
msp_0665	Liver	NAFLD	ESP	1	depleted
msp_0712	Liver	LC	CHN	1	enriched
msp_0712	Obesity-CVD	ACVD	CHN	1	enriched
msp_0712	Obesity-CVD	atherosclerosis	SWE	1	enriched
msp_0712	Others	acute diarrhea	USA	1	enriched
msp_0713	Cancer	NSCLC	FRA	1	enriched
msp_0713	Cancer	RCC	FRA	1	enriched
msp_0713	IBD	CD	ESP	1	enriched
msp_0713	Liver	LC	GBR	1	enriched
msp_0722	Adenoma	adenoma	ITA	1	depleted
msp_0722	Cancer	NSCLC	FRA	1	depleted
msp_0722	Cancer	RCC	FRA	1	depleted
msp_0722	IBD	CD	ESP	1	depleted
msp_0722	Liver	LC	GBR	1	depleted
msp_0742	Cancer	RCC	FRA	1	depleted
msp_0742	IBD	CD	ESP	1	depleted
msp_0742	IBD	UC	ESP	1	depleted
msp_0742	Liver	LC	CHN	1	enriched
msp_0742	Liver	NAFLD	USA	1	enriched
msp_0742	Obesity-CVD	ACVD	CHN	1	enriched
msp_0747	Cancer	NSCLC	FRA	1	depleted
msp_0747	Hyperglycaemia	T2D	ESP	1	depleted
msp_0747	IBD	UC	ESP	1	depleted
msp_0747	Liver	NAFLD	ESP	1	depleted
msp_0820	Hyperglycaemia	IGT	SWE	1	depleted
msp_0820	Hyperglycaemia	T2D	SWE	1	depleted
msp_0820	IBD	UC	ESP	1	depleted
msp_0833	Adenoma	adenoma	ITA	1	depleted
msp_0833	Cancer	NSCLC	FRA	1	depleted
msp_0833	Cancer	RCC	FRA	1	depleted
msp_0833	IBD	CD	ESP	1	depleted
msp_0833	IBD	UC	ESP	1	depleted
msp_0851	Cancer	NSCLC	FRA	1	depleted
msp_0851	Hyperglycaemia	T2D	ESP	1	depleted
msp_0851	IBD	CD	ESP	1	depleted
msp_0851	IBD	UC	ESP	1	depleted
msp_0851	Liver	NAFLD	ESP	1	depleted
msp_0861	Cancer	CRC	AUT	1	enriched
msp_0861	Cancer	NSCLC	FRA	1	enriched
msp_0861	Cancer	RCC	FRA	1	enriched
msp_0885	Cancer	NSCLC	FRA	1	depleted
msp_0885	Cancer	RCC	FRA	1	depleted
msp_0885	IBD	UC	ESP	1	depleted
msp_0959	Cancer	NSCLC	FRA	1	depleted
msp_0959	Hyperglycaemia	T2D	ESP	1	depleted
msp_0959	IBD	UC	ESP	1	depleted
msp_0959	Liver	NAFLD	ESP	1	depleted
msp_0974c	Cancer	CRC	FRA	1	depleted
msp_0974c	Cancer	NSCLC	FRA	1	depleted
msp_0974c	Cancer	RCC	FRA	1	depleted
msp_0977	Cancer	CRC	AUT	1	enriched
msp_0977	Cancer	NSCLC	FRA	1	enriched
msp_0977	Cancer	RCC	FRA	1	enriched
msp_0977	Obesity-CVD	atherosclerosis	SWE	1	enriched
msp_0986	Cancer	NSCLC	FRA	1	depleted
msp_0986	Cancer	RCC	FRA	1	depleted
msp_0986	IBD	CD	ESP	1	depleted
msp_0986	IBD	UC	ESP	1	depleted
msp_0986	Liver	LC	GBR	1	depleted
msp_1006	Cancer	melanoma	USA	1	enriched
msp_1006	Liver	LC	CHN	1	enriched
msp_1006	Liver	LC	GBR	1	enriched
msp_1006	Obesity-CVD	ACVD	CHN	1	enriched
msp_1060c	Cancer	CRC	AUT	1	enriched
msp_1060c	Cancer	NSCLC	FRA	1	enriched
msp_1060c	Cancer	RCC	FRA	1	enriched
msp_1127	Liver	LC	CHN	1	enriched
msp_1127	Liver	LC	GBR	1	enriched
msp_1127	Obesity-CVD	ACVD	CHN	1	enriched
msp_1156	Adenoma	adenoma	ITA	1	depleted
msp_1156	Cancer	CRC	GER	1	enriched
msp_1156	Cancer	CRC	ITA	1	enriched
msp_1156	Cancer	CRC	USA	1	enriched
msp_1156	Cancer	NSCLC	FRA	1	depleted
msp_1156	Cancer	RCC	FRA	1	depleted
msp_1156	Hyperglycaemia	T2D	ESP	1	depleted
msp_1156	Obesity-CVD	ACVD	CHN	1	enriched
msp_1191c	Liver	LC	CHN	1	enriched
msp_1191c	Liver	NAFLD	USA	1	enriched
msp_1191c	Obesity-CVD	ACVD	CHN	1	enriched
msp_1191c	Others	acute diarrhea	USA	1	enriched
msp_1193	Cancer	CRC	CHN	1	enriched
msp_1193	Cancer	CRC	USA	1	enriched
msp_1193	Liver	LC	CHN	1	enriched
msp_1193	Others	acute diarrhea	USA	1	enriched
msp_1234	Cancer	CRC	AUT	1	enriched
msp_1234	Cancer	CRC	CHN	1	enriched
msp_1234	Cancer	CRC	GER	2	enriched
msp_1234	Cancer	CRC	ITA	1	enriched
msp_1234	Cancer	CRC	JPN	1	enriched
msp_1291	Adenoma	adenoma	ITA	1	depleted
msp_1291	Cancer	NSCLC	FRA	1	depleted
msp_1291	Cancer	RCC	FRA	1	depleted
msp_1291	IBD	CD	ESP	1	depleted
msp_1291	IBD	UC	ESP	1	depleted
msp_1291	Liver	LC	GBR	1	depleted
msp_1325	IBD	CD	CHN	1	enriched
msp_1325	Liver	LC	CHN	1	enriched
msp_1325	Liver	LC	GBR	1	enriched
msp_1327	Cancer	CRC	AUT	1	enriched
msp_1327	Cancer	CRC	CHN	1	enriched
msp_1327	Cancer	CRC	FRA	1	enriched
msp_1327	Cancer	CRC	GER	2	enriched
msp_1327	Cancer	CRC	ITA	1	enriched
msp_1353	Cancer	NSCLC	FRA	1	depleted
msp_1353	Cancer	RCC	FRA	1	depleted
msp_1353	Hyperglycaemia	IGT	SWE	1	depleted
msp_1403	Adenoma	adenoma	ITA	1	depleted
msp_1403	Cancer	NSCLC	FRA	1	depleted
msp_1403	Cancer	RCC	FRA	1	depleted
msp_1403	Liver	LC	GBR	1	depleted
msp_1453	Cancer	melanoma	USA	1	enriched
msp_1453	Liver	LC	CHN	1	enriched
msp_1453	Liver	NAFLD	USA	1	enriched
msp_1453	Obesity-CVD	ACVD	CHN	1	enriched
msp_1641	Adenoma	adenoma	ITA	1	depleted
msp_1641	Cancer	CRC	GER	1	depleted
msp_1641	Cancer	NSCLC	FRA	1	depleted
msp_1641	Hyperglycaemia	IGT	SWE	1	depleted
msp_1641	IBD	UC	ESP	1	depleted
msp_1643c	Adenoma	adenoma	ITA	1	depleted
msp_1643c	Cancer	NSCLC	FRA	1	depleted
msp_1643c	Cancer	RCC	FRA	1	depleted
msp_1643c	Liver	LC	GBR	1	depleted

## Sheet: README
Supplemental Table S6. Statistics of common MSP enriched/depleted diseases. The table displays the MSPs with an effect size above 0.3 in the same direction in at least three different cohorts, along with the corresponding country, disease, and disease category.
