# Supplementary material for: Global compositional and functional states of the human gut microbiome in health and disease
Source: Genome Res. 2024 Jun;34(6):967–78. doi: 10.1101/gr.278637.123 (PMC11293553; doi:10.1101/gr.278637.123)
Supplement: Supplement 7 [file Supplemental_Table_S7.xlsx]

## Sheet: Table S7
ID	Size	Number of enriches species (annotation coverage > 75%)	Representative clusters	Singletons	Enriched MSPs (annotation coverage > 75%)	Enriched species names (annotation coverage > 75%)	Enriched KEGG modules	Subsystem of enriched modules	KEGG orthology terms included	PFAM terms included	Virulence (PATRIC) included	CAZyme included	AMR terms (Mustard) included	Secondary metabolism (anti-SMASH) terms included	Phenotype (JGI-GOLD) terms included	Product names of virulence terms included	All terms of modules
CL-93	4	593	Yes	No	msp_0003;msp_0007;msp_0009;msp_0010;msp_0011;msp_0012;msp_0013;msp_0014;msp_0015;msp_0016;msp_0017;msp_0018;msp_0019;msp_0020;msp_0023;msp_0024;msp_0025;msp_0027;msp_0029;msp_0034;msp_0035;msp_0036;msp_0037;msp_0038;msp_0039;msp_0040;msp_0041;msp_0042;msp_0043;msp_0044;msp_0045;msp_0046;msp_0047;msp_0048;msp_0049;msp_0050;msp_0051;msp_0052;msp_0053;msp_0056;msp_0057;msp_0058;msp_0059;msp_0060;msp…	Bacteroides cellulosilyticus;Bacteroides ovatus;[Clostridium] bolteae;Bacteroides fragilis 1;Bacteroides thetaiotaomicron;Parabacteroides distasonis;Ruminococcus bicirculans;Eisenbergiella tayi;Roseburia faecis;Bacteroides plebeius;Roseburia intestinalis;Eisenbergiella massiliensis;Bacteroides faecis;[Clostridium] clostridioforme 1;Bacteroides caccae;Hungatella effluvii;Akkermansia muciniphila;Pa…	-	-	K15342;K09951	Cas_Cas1;CRISPR_Cas2	-	-	-	-	-	-	K15342;Cas_Cas1;CRISPR_Cas2;K09951
CL-12	2393	590	Yes	No	msp_0009;msp_0024;msp_0014;msp_0017;msp_0018;msp_0079;msp_0015;msp_0050;msp_0074;msp_0058;msp_0165;msp_0071;msp_0329;msp_0065;msp_0052;msp_0029;msp_0112;msp_0057;msp_0072;msp_0237;msp_0107;msp_0056;msp_0254;msp_0077;msp_0060;msp_0086;msp_0068;msp_0152;msp_0181;msp_0208;msp_0076;msp_0259;msp_0048;msp_0142;msp_0163;msp_0200;msp_0168;msp_0182;msp_0164;msp_0042;msp_0115c;msp_0109;msp_0373;msp_0125;ms…	[Clostridium] bolteae;Hungatella effluvii;Eisenbergiella tayi;Roseburia intestinalis;Eisenbergiella massiliensis;[Clostridium] sp. CAG:7;Roseburia faecis;Anaerobutyricum hallii;Roseburia sp. CAG:100 / Lachnospiraceae bacterium CIM:MAG 54;[Ruminococcus] gnavus;unclassified Lachnospiraceae;Roseburia hominis;Clostridium butyricum;[Ruminococcus] sp. CAG:17 / Blautia sp. 2789STDY5608880;Blautia sp. CA…	M00165:Reductive pentose phosphate cycle (Calvin cycle) ;M00001:Glycolysis (Embden-Meyerhof pathway), glucose => pyruvate ;M00002:Glycolysis, core module involving three-carbon compounds ;M00003:Gluconeogenesis, oxaloacetate => fructose-6P ;M00010:Citrate cycle, first carbon oxidation, oxaloacetate => 2-oxoglutarate ;M00632:Galactose degradation, Leloir pathway, galactose => alpha-D-glucose-1P ;M…	Carbon fixation;Central carbohydrate metabolism;Other carbohydrate metabolism;Fatty acid metabolism;Terpenoid backbone biosynthesis;Purine metabolism;Pyrimidine metabolism;Serine and threonine metabolism;Cysteine and methionine metabolism;Branched-chain amino acid metabolism;Lysine metabolism;Arginine and proline metabolism;Histidine metabolism;Aromatic amino acid metabolism;Cofactor and vitamin …	K00287;K00059;K00134;K00384;K00527;K00566;K00600;K00602;K00604;K00615;K00645;K00688;K00700;K00703;K00762;K00763;K00773;K00784;K00789;K00791;K00806;K00845;K00850;K00858;K00873;K00927;K00939;K00942;K00948;K00974;K00975;K00981;K00995;K01056;K01069;K01262;K01265;K01409;K01424;K01462;K01465;K01491;K01537;K01586;K01624;K01689;K01733;K01752;K01756;K01783;K01784;K01785;K01803;K01810;K01835;K01866;K01867;…	DHFR_1;2-Hacid_dh;2-Hacid_dh_C;3Beta_HSD;4HBT;5-FTHF_cyc-lig;5_3_exonuc;5_3_exonuc_N;60KD_IMP;AA_kinase;AAA;AAA_11;AAA_14;AAA_15;AAA_16;AAA_17;AAA_18;AAA_19;AAA_2;AAA_21;AAA_22;AAA_23;AAA_25;AAA_29;AAA_30;AAA_31;AAA_33;AAA_5;AAA_assoc_2;ABC_membrane;ABC_tran;ABC_tran_CTD;ABC_tran_Xtn;ABC2_membrane;ABC2_membrane_2;ABC2_membrane_3;Abhydrolase_1;Abhydrolase_3;Abhydrolase_6;Acetate_kinase;Acetyltrans…	BARBAKC583_1172;c1661;Lmon1_020100006893;Rv1638;Rv2703;SL1344_1828;STM14_0530;lmo2825;LmonL_020200001239;Rv0820;Z2463;S2725;STM0776;Z4466;SL1344_2072;STM14_2591;SL1344_2071;SL1344_2057;Z2550	cazy.CBM50;cazy.GH3;cazy.GT2;cazy.GT28;cazy.GT35;cazy.GT4;cazy.GT51;cazy.GH13;cazy.GH13_9;cazy.GH2;cazy.GH77;cazy.GT5;cazy.GH23;cazy.GH25;cazy.GH73;cazy.CBM48;cazy.GH31;cazy.GH36	tetM;van;erm;dfrA	-	-	Heat shock protein 60 kDa family chaperone GroEL;GTP-binding and nucleic acid-binding protein YchF;Phosphoserine aminotransferase (EC 2.6.1.52);Protein translocase subunit SecA;Chaperone protein ClpB (ATP-dependent unfoldase);Phosphate ABC transporter, ATP-binding protein PstB (TC 3.A.1.7.1);Excinuclease ABC subunit A;RNA polymerase sigma factor RpoD;GMP synthase [glutamine-hydrolyzing], amidotra…	K00287;DHFR_1;tetM;van;erm;cazy.CBM50;cazy.GH3;cazy.GT2;cazy.GT28;cazy.GT35;cazy.GT4;cazy.GT51;BARBAKC583_1172;c1661;Lmon1_020100006893;Rv1638;Rv2703;SL1344_1828;STM14_0530;K00059;K00134;K00384;K00527;K00566;K00600;K00602;K00604;K00615;K00645;K00688;K00700;K00703;K00762;K00763;K00773;K00784;K00789;K00791;K00806;K00845;K00850;K00858;K00873;K00927;K00939;K00942;K00948;K00974;K00975;K00981;K00995;K0…
CL-572	4	532	Yes	No	msp_0003;msp_0005;msp_0009;msp_0010;msp_0012;msp_0013;msp_0014;msp_0015;msp_0016;msp_0017;msp_0018;msp_0020;msp_0023;msp_0024;msp_0026;msp_0029;msp_0030;msp_0031;msp_0033;msp_0034;msp_0038;msp_0039;msp_0042;msp_0043;msp_0044;msp_0045;msp_0047;msp_0048;msp_0050;msp_0052;msp_0053;msp_0056;msp_0057;msp_0058;msp_0071;msp_0077;msp_0081;msp_0082c;msp_0087;msp_0089;msp_0091;msp_0093;msp_0095;msp_0097;ms…	Bacteroides cellulosilyticus;Escherichia coli;[Clostridium] bolteae;Bacteroides fragilis 1;Parabacteroides distasonis;Ruminococcus bicirculans;Eisenbergiella tayi;Roseburia faecis;Bacteroides plebeius;Roseburia intestinalis;Eisenbergiella massiliensis;[Clostridium] clostridioforme 1;Bacteroides caccae;Hungatella effluvii;Paraprevotella clara;[Eubacterium] eligens;Klebsiella pneumoniae;Bacteroides…	-	-	K07497	HTH_21;rve_2;rve_3	-	-	-	-	-	-	HTH_21;rve_2;rve_3;K07497
CL-465	3	531	Yes	No	msp_0003;msp_0007;msp_0008;msp_0009;msp_0010;msp_0011;msp_0012;msp_0016;msp_0018;msp_0019;msp_0022;msp_0023;msp_0024;msp_0026;msp_0027;msp_0028;msp_0031;msp_0032;msp_0033;msp_0036;msp_0037;msp_0040;msp_0041;msp_0043;msp_0044;msp_0046;msp_0047;msp_0049;msp_0051;msp_0053;msp_0054;msp_0056;msp_0059;msp_0061;msp_0062;msp_0063;msp_0064;msp_0065;msp_0067;msp_0069;msp_0078;msp_0080;msp_0081;msp_0083;msp…	Bacteroides cellulosilyticus;Bacteroides ovatus;Bacteroides intestinalis;[Clostridium] bolteae;Bacteroides fragilis 1;Bacteroides thetaiotaomicron;Parabacteroides distasonis;Bacteroides plebeius;Eisenbergiella massiliensis;Bacteroides faecis;Bacteroides finegoldii;Bacteroides caccae;Hungatella effluvii;Paraprevotella clara;Parabacteroides merdae;Parabacteroides goldsteinii;Bacteroides stercoris;A…	-	-	K00175;K00177;K00174	-	-	-	-	-	-	-	K00175;K00177;K00174
CL-520	3	500	Yes	No	msp_0003;msp_0005;msp_0007;msp_0008;msp_0009;msp_0010;msp_0011;msp_0012;msp_0013;msp_0014;msp_0015;msp_0016;msp_0017;msp_0018;msp_0019;msp_0020;msp_0021;msp_0023;msp_0024;msp_0027;msp_0028;msp_0031;msp_0032;msp_0033;msp_0037;msp_0038;msp_0039;msp_0044;msp_0045;msp_0046;msp_0049;msp_0053;msp_0054;msp_0055;msp_0056;msp_0057;msp_0058;msp_0059;msp_0061;msp_0063;msp_0064;msp_0068;msp_0070;msp_0072;msp…	Bacteroides cellulosilyticus;Escherichia coli;Bacteroides ovatus;Bacteroides intestinalis;[Clostridium] bolteae;Bacteroides fragilis 1;Bacteroides thetaiotaomicron;Parabacteroides distasonis;Ruminococcus bicirculans;Eisenbergiella tayi;Roseburia faecis;Bacteroides plebeius;Roseburia intestinalis;Eisenbergiella massiliensis;Bacteroides faecis;[Clostridium] clostridioforme 1;Bacteroides xylanisolve…	-	-	-	Pentapeptide_3;Pentapeptide_4;Pentapeptide	-	-	-	-	-	-	Pentapeptide_3;Pentapeptide_4;Pentapeptide
CL-564	3	489	Yes	No	msp_0005;msp_0009;msp_0013;msp_0014;msp_0015;msp_0018;msp_0020;msp_0024;msp_0025;msp_0029;msp_0030;msp_0042;msp_0044;msp_0045;msp_0048;msp_0049;msp_0050;msp_0052;msp_0055;msp_0056;msp_0058;msp_0060;msp_0065;msp_0066;msp_0070;msp_0071;msp_0075;msp_0076;msp_0077;msp_0079;msp_0082c;msp_0085;msp_0086;msp_0094;msp_0100;msp_0103;msp_0104;msp_0106;msp_0107;msp_0108;msp_0109;msp_0111;msp_0112;msp_0113;ms…	Escherichia coli;[Clostridium] bolteae;Ruminococcus bicirculans;Eisenbergiella tayi;Roseburia faecis;Eisenbergiella massiliensis;[Clostridium] clostridioforme 1;Hungatella effluvii;Akkermansia muciniphila;[Eubacterium] eligens;Klebsiella pneumoniae;Coprococcus eutactus 2;Hungatella hathewayi 1;Ruminococcus bromii 2;[Eubacterium] sp. CAG:38;unclassified Lachnoclostridium;Anaerobutyricum hallii;Bla…	-	-	K07667;K07646	DUF4118	-	-	-	-	-	-	K07667;DUF4118;K07646
CL-425	7	480	Yes	No	msp_0005;msp_0009;msp_0010;msp_0013;msp_0014;msp_0015;msp_0017;msp_0019;msp_0020;msp_0021;msp_0023;msp_0024;msp_0026;msp_0027;msp_0029;msp_0030;msp_0034;msp_0039;msp_0040;msp_0041;msp_0042;msp_0043;msp_0044;msp_0045;msp_0047;msp_0048;msp_0049;msp_0050;msp_0053;msp_0055;msp_0058;msp_0060;msp_0066;msp_0068;msp_0071;msp_0072;msp_0074;msp_0075;msp_0077;msp_0083;msp_0084;msp_0086;msp_0087;msp_0088;msp…	Escherichia coli;[Clostridium] bolteae;Bacteroides fragilis 1;Ruminococcus bicirculans;Eisenbergiella tayi;Roseburia faecis;Roseburia intestinalis;Bacteroides faecis;[Clostridium] clostridioforme 1;Bacteroides xylanisolvens;Bacteroides caccae;Hungatella effluvii;Paraprevotella clara;Parabacteroides merdae;[Eubacterium] eligens;Klebsiella pneumoniae;[Faecalibacterium] sp. CAG:74;Lachnospiraceae ba…	M00333:Type IV secretion system	Bacterial secretion system	K03205;K12063	AAA_10;T4SS-DNA_transf;TraG-D_C;TrwB_AAD_bind;DUF87	-	-	-	-	-	-	K03205;AAA_10;T4SS-DNA_transf;TraG-D_C;TrwB_AAD_bind;K12063;DUF87
CL-282	3	479	Yes	No	msp_0003;msp_0005;msp_0007;msp_0008;msp_0009;msp_0010;msp_0011;msp_0012;msp_0014;msp_0016;msp_0018;msp_0019;msp_0020;msp_0021;msp_0022;msp_0023;msp_0024;msp_0026;msp_0027;msp_0028;msp_0030;msp_0031;msp_0032;msp_0033;msp_0036;msp_0037;msp_0038;msp_0040;msp_0044;msp_0046;msp_0049;msp_0051;msp_0054;msp_0056;msp_0058;msp_0059;msp_0061;msp_0063;msp_0066;msp_0067;msp_0069;msp_0080;msp_0081;msp_0082c;ms…	Bacteroides cellulosilyticus;Escherichia coli;Bacteroides ovatus;Bacteroides intestinalis;[Clostridium] bolteae;Bacteroides fragilis 1;Bacteroides thetaiotaomicron;Parabacteroides distasonis;Eisenbergiella tayi;Bacteroides plebeius;Eisenbergiella massiliensis;Bacteroides faecis;[Clostridium] clostridioforme 1;Bacteroides xylanisolvens;Bacteroides finegoldii;Bacteroides caccae;Hungatella effluvii;…	M00053:Pyrimidine deoxyribonuleotide biosynthesis, CDP/CTP => dCDP/dCTP,dTDP/dTTP	Pyrimidine metabolism	K00525	Ribonuc_red_lgC;Ribonuc_red_lgN	-	-	-	-	-	-	Ribonuc_red_lgC;Ribonuc_red_lgN;K00525
CL-511	3	479	Yes	No	msp_0003;msp_0007;msp_0010;msp_0011;msp_0012;msp_0014;msp_0015;msp_0016;msp_0017;msp_0018;msp_0020;msp_0021;msp_0022;msp_0023;msp_0024;msp_0025;msp_0026;msp_0027;msp_0031;msp_0032;msp_0033;msp_0034;msp_0035;msp_0036;msp_0037;msp_0038;msp_0040;msp_0041;msp_0042;msp_0043;msp_0045;msp_0046;msp_0049;msp_0050;msp_0051;msp_0052;msp_0054;msp_0057;msp_0058;msp_0059;msp_0060;msp_0063;msp_0064;msp_0067;msp…	Bacteroides cellulosilyticus;Bacteroides ovatus;Bacteroides fragilis 1;Bacteroides thetaiotaomicron;Parabacteroides distasonis;Eisenbergiella tayi;Roseburia faecis;Bacteroides plebeius;Roseburia intestinalis;Eisenbergiella massiliensis;[Clostridium] clostridioforme 1;Bacteroides xylanisolvens;Bacteroides finegoldii;Bacteroides caccae;Hungatella effluvii;Akkermansia muciniphila;Paraprevotella clar…	-	-	K05946	Glyco_tran_WecB	-	cazy.GT26	-	-	-	-	K05946;Glyco_tran_WecB;cazy.GT26
CL-505	4	476	Yes	No	msp_0013;msp_0014;msp_0015;msp_0017;msp_0018;msp_0020;msp_0024;msp_0029;msp_0034;msp_0039;msp_0041;msp_0042;msp_0046;msp_0047;msp_0048;msp_0053;msp_0054;msp_0055;msp_0057;msp_0058;msp_0060;msp_0068;msp_0071;msp_0072;msp_0074;msp_0075;msp_0076;msp_0077;msp_0078;msp_0080;msp_0084;msp_0085;msp_0091;msp_0093;msp_0094;msp_0115c;msp_0125;msp_0127;msp_0133;msp_0137;msp_0154;msp_0161;msp_0162;msp_0165;ms…	Ruminococcus bicirculans;Eisenbergiella tayi;Roseburia faecis;Roseburia intestinalis;Eisenbergiella massiliensis;[Clostridium] clostridioforme 1;Hungatella effluvii;[Eubacterium] eligens;[Faecalibacterium] sp. CAG:74;Lachnospiraceae bacterium hRUG904 / Clostridiales bacterium RUG495 / [Clostridium] sp. CAG:127;Prevotella copri 1;Coprococcus eutactus 2;Bacteroides uniformis;[Eubacterium] sp. CAG:1…	-	-	K00702	Glyco_hydro_36;Glyco_transf_36	-	cazy.GH94	-	-	-	-	K00702;Glyco_hydro_36;Glyco_transf_36;cazy.GH94
CL-426	4	475	Yes	No	msp_0005;msp_0009;msp_0014;msp_0015;msp_0017;msp_0018;msp_0020;msp_0024;msp_0025;msp_0030;msp_0034;msp_0044;msp_0049;msp_0052;msp_0056;msp_0060;msp_0066;msp_0068;msp_0070;msp_0071;msp_0072;msp_0074;msp_0075;msp_0077;msp_0082c;msp_0085;msp_0086;msp_0100;msp_0103;msp_0104;msp_0105;msp_0108;msp_0111;msp_0113;msp_0115c;msp_0124;msp_0125;msp_0129;msp_0132;msp_0134;msp_0140;msp_0142;msp_0144;msp_0146c;…	Escherichia coli;[Clostridium] bolteae;Eisenbergiella tayi;Roseburia faecis;Roseburia intestinalis;Eisenbergiella massiliensis;[Clostridium] clostridioforme 1;Hungatella effluvii;Akkermansia muciniphila;Klebsiella pneumoniae;[Faecalibacterium] sp. CAG:74;Hungatella hathewayi 1;unclassified Lachnoclostridium;Blautia sp. CAG:257;unclassified Lachnoclostridium;Lachnospiraceae bacterium CIM:MAG 844 /…	M00439:Oligopeptide transport system	Peptide and nickel transport system	K15581;K15582;K15583;K10823	-	-	-	-	-	-	-	K15581;K15582;K15583;K10823
CL-223	4	467	Yes	No	msp_0009;msp_0014;msp_0017;msp_0018;msp_0020;msp_0024;msp_0038;msp_0044;msp_0049;msp_0050;msp_0052;msp_0055;msp_0056;msp_0057;msp_0058;msp_0060;msp_0065;msp_0066;msp_0068;msp_0071;msp_0072;msp_0073;msp_0074;msp_0079;msp_0085;msp_0086;msp_0094;msp_0103;msp_0105;msp_0106;msp_0107;msp_0109;msp_0113;msp_0115c;msp_0116;msp_0124;msp_0125;msp_0129;msp_0131;msp_0132;msp_0135;msp_0141;msp_0142;msp_0147;ms…	[Clostridium] bolteae;Eisenbergiella tayi;Roseburia intestinalis;Eisenbergiella massiliensis;[Clostridium] clostridioforme 1;Hungatella effluvii;unclassified Lentisphaeria;Hungatella hathewayi 1;unclassified Lachnoclostridium;Anaerobutyricum hallii;Blautia sp. CAG:257;Firmicutes bacterium CAG:65 / [Clostridium] sp. 2789STDY5608883;unclassified Lachnoclostridium;Roseburia sp. CAG:45 & sp. 2789STDY…	-	-	K00302;K00111	DUF1667;Fer2_BFD	-	-	-	-	-	-	K00302;DUF1667;Fer2_BFD;K00111
CL-562	3	467	Yes	No	msp_0003;msp_0007;msp_0008;msp_0009;msp_0010;msp_0011;msp_0012;msp_0013;msp_0014;msp_0015;msp_0016;msp_0017;msp_0018;msp_0019;msp_0020;msp_0023;msp_0024;msp_0026;msp_0027;msp_0028;msp_0029;msp_0032;msp_0033;msp_0037;msp_0039;msp_0040;msp_0042;msp_0044;msp_0045;msp_0046;msp_0047;msp_0049;msp_0050;msp_0052;msp_0055;msp_0056;msp_0058;msp_0059;msp_0060;msp_0061;msp_0062;msp_0064;msp_0068;msp_0069;msp…	Bacteroides cellulosilyticus;Bacteroides ovatus;Bacteroides intestinalis;[Clostridium] bolteae;Bacteroides fragilis 1;Bacteroides thetaiotaomicron;Parabacteroides distasonis;Ruminococcus bicirculans;Eisenbergiella tayi;Roseburia faecis;Bacteroides plebeius;Roseburia intestinalis;Eisenbergiella massiliensis;Bacteroides faecis;[Clostridium] clostridioforme 1;Bacteroides caccae;Hungatella effluvii;P…	-	-	K02171	Penicillinase_R;Peptidase_M56	-	-	-	-	-	-	Penicillinase_R;Peptidase_M56;K02171
CL-560	4	464	Yes	No	msp_0003;msp_0007;msp_0008;msp_0009;msp_0010;msp_0011;msp_0012;msp_0013;msp_0016;msp_0019;msp_0020;msp_0021;msp_0022;msp_0023;msp_0026;msp_0027;msp_0028;msp_0031;msp_0033;msp_0036;msp_0037;msp_0038;msp_0039;msp_0040;msp_0042;msp_0046;msp_0049;msp_0050;msp_0053;msp_0054;msp_0056;msp_0060;msp_0061;msp_0063;msp_0069;msp_0073;msp_0082c;msp_0083;msp_0093;msp_0097;msp_0098;msp_0099;msp_0101;msp_0102;ms…	Bacteroides cellulosilyticus;Bacteroides ovatus;Bacteroides intestinalis;[Clostridium] bolteae;Bacteroides fragilis 1;Bacteroides thetaiotaomicron;Parabacteroides distasonis;Ruminococcus bicirculans;Bacteroides plebeius;Bacteroides faecis;[Clostridium] clostridioforme 1;Bacteroides xylanisolvens;Bacteroides finegoldii;Bacteroides caccae;Paraprevotella clara;Parabacteroides merdae;Parabacteroides …	-	-	K00180;K01912;K00179	AMP-binding_C_2	-	-	-	-	-	-	K00180;K01912;AMP-binding_C_2;K00179
CL-487	3	455	Yes	No	msp_0007;msp_0009;msp_0014;msp_0015;msp_0017;msp_0018;msp_0020;msp_0021;msp_0024;msp_0029;msp_0031;msp_0044;msp_0048;msp_0049;msp_0052;msp_0053;msp_0056;msp_0058;msp_0065;msp_0066;msp_0068;msp_0071;msp_0072;msp_0074;msp_0075;msp_0076;msp_0077;msp_0079;msp_0085;msp_0086;msp_0087;msp_0093;msp_0094;msp_0104;msp_0106;msp_0109;msp_0111;msp_0113;msp_0115c;msp_0119;msp_0125;msp_0126;msp_0129;msp_0134;ms…	Bacteroides ovatus;[Clostridium] bolteae;Eisenbergiella tayi;Roseburia faecis;Roseburia intestinalis;Eisenbergiella massiliensis;[Clostridium] clostridioforme 1;Bacteroides xylanisolvens;Hungatella effluvii;[Eubacterium] eligens;Bacteroides stercoris;Hungatella hathewayi 1;[Eubacterium] sp. CAG:38;unclassified Lachnoclostridium;Blautia sp. CAG:257;[Eubacterium] siraeum;unclassified Lachnoclostrid…	M00145:NAD(P)H:quinone oxidoreductase, chloroplasts and cyanobacteria	ATP synthesis	K06306	Glyco_hydro_18	-	cazy.GH18	-	-	-	-	K06306;Glyco_hydro_18;cazy.GH18
CL-365	6	450	Yes	No	msp_0003;msp_0005;msp_0007;msp_0008;msp_0009;msp_0010;msp_0011;msp_0012;msp_0014;msp_0016;msp_0017;msp_0018;msp_0019;msp_0022;msp_0023;msp_0024;msp_0026;msp_0027;msp_0028;msp_0029;msp_0030;msp_0031;msp_0033;msp_0034;msp_0036;msp_0037;msp_0038;msp_0040;msp_0041;msp_0043;msp_0044;msp_0046;msp_0048;msp_0049;msp_0054;msp_0055;msp_0056;msp_0058;msp_0060;msp_0063;msp_0064;msp_0066;msp_0067;msp_0068;msp…	Bacteroides cellulosilyticus;Escherichia coli;Bacteroides ovatus;Bacteroides intestinalis;[Clostridium] bolteae;Bacteroides fragilis 1;Bacteroides thetaiotaomicron;Parabacteroides distasonis;Eisenbergiella tayi;Bacteroides plebeius;Roseburia intestinalis;Eisenbergiella massiliensis;Bacteroides faecis;Bacteroides finegoldii;Bacteroides caccae;Hungatella effluvii;Paraprevotella clara;Parabacteroide…	M00008:Entner-Doudoroff pathway, glucose-6P => glyceraldehyde-3P + pyruvate ;M00308:Semi-phosphorylative Entner-Doudoroff pathway, gluconate => glycerate-3P ;M00631:D-Galacturonate degradation (bacteria) ;M00061:D-Glucuronate degradation	Central carbohydrate metabolism;Other carbohydrate metabolism	K01812;K01625;K01686	UxaC;Aldolase;UxuA	-	-	-	-	-	-	K01812;UxaC;K01625;K01686;Aldolase;UxuA
CL-552	3	441	Yes	No	msp_0003;msp_0005;msp_0007;msp_0008;msp_0010;msp_0011;msp_0012;msp_0016;msp_0019;msp_0021;msp_0022;msp_0023;msp_0024;msp_0025;msp_0026;msp_0027;msp_0028;msp_0030;msp_0031;msp_0032;msp_0035;msp_0036;msp_0037;msp_0040;msp_0043;msp_0044;msp_0046;msp_0051;msp_0054;msp_0055;msp_0059;msp_0061;msp_0062;msp_0063;msp_0069;msp_0070;msp_0075;msp_0080;msp_0082c;msp_0088;msp_0089;msp_0090;msp_0092;msp_0095;ms…	Bacteroides cellulosilyticus;Escherichia coli;Bacteroides ovatus;Bacteroides intestinalis;Bacteroides fragilis 1;Bacteroides thetaiotaomicron;Parabacteroides distasonis;Bacteroides plebeius;Bacteroides faecis;Bacteroides xylanisolvens;Bacteroides finegoldii;Bacteroides caccae;Hungatella effluvii;Akkermansia muciniphila;Paraprevotella clara;Parabacteroides merdae;Parabacteroides goldsteinii;Klebsi…	-	-	K04564	Sod_Fe_C;Sod_Fe_N	-	-	-	-	-	-	Sod_Fe_C;Sod_Fe_N;K04564
CL-559	3	441	Yes	No	msp_0003;msp_0007;msp_0008;msp_0010;msp_0011;msp_0012;msp_0013;msp_0015;msp_0016;msp_0017;msp_0019;msp_0022;msp_0023;msp_0025;msp_0026;msp_0027;msp_0028;msp_0029;msp_0031;msp_0032;msp_0033;msp_0035;msp_0036;msp_0037;msp_0038;msp_0040;msp_0041;msp_0043;msp_0046;msp_0047;msp_0048;msp_0051;msp_0052;msp_0053;msp_0054;msp_0055;msp_0058;msp_0059;msp_0061;msp_0062;msp_0063;msp_0067;msp_0068;msp_0069;msp…	Bacteroides cellulosilyticus;Bacteroides ovatus;Bacteroides intestinalis;Bacteroides fragilis 1;Bacteroides thetaiotaomicron;Parabacteroides distasonis;Ruminococcus bicirculans;Roseburia faecis;Bacteroides plebeius;Roseburia intestinalis;Bacteroides faecis;Bacteroides finegoldii;Bacteroides caccae;Akkermansia muciniphila;Paraprevotella clara;Parabacteroides merdae;Parabacteroides goldsteinii;[Eub…	M00627:beta-Lactam resistance, Bla system	Drug resistance	K13747;K00290	Sacchrp_dh_C	-	-	-	-	-	-	K13747;Sacchrp_dh_C;K00290
CL-373	3	432	Yes	No	msp_0003;msp_0004;msp_0006;msp_0007;msp_0008;msp_0010;msp_0011;msp_0012;msp_0014;msp_0016;msp_0017;msp_0018;msp_0019;msp_0021;msp_0022;msp_0023;msp_0024;msp_0025;msp_0026;msp_0027;msp_0028;msp_0031;msp_0032;msp_0033;msp_0034;msp_0035;msp_0036;msp_0037;msp_0038;msp_0040;msp_0041;msp_0043;msp_0044;msp_0046;msp_0051;msp_0054;msp_0059;msp_0060;msp_0061;msp_0062;msp_0063;msp_0064;msp_0069;msp_0070;msp…	Bacteroides cellulosilyticus;Blastocystis sp. subtype 2;Blastocystis sp. subtype 4;Bacteroides ovatus;Bacteroides intestinalis;Bacteroides fragilis 1;Bacteroides thetaiotaomicron;Parabacteroides distasonis;Eisenbergiella tayi;Bacteroides plebeius;Roseburia intestinalis;Eisenbergiella massiliensis;Bacteroides faecis;Bacteroides xylanisolvens;Bacteroides finegoldii;Bacteroides caccae;Hungatella eff…	-	-	-	Glyco_hydro_20;Glyco_hydro_20b	-	cazy.GH20	-	-	-	-	Glyco_hydro_20;Glyco_hydro_20b;cazy.GH20
CL-377	6	431	Yes	No	msp_0005;msp_0009;msp_0015;msp_0017;msp_0020;msp_0024;msp_0029;msp_0030;msp_0039;msp_0042;msp_0044;msp_0047;msp_0048;msp_0049;msp_0050;msp_0052;msp_0053;msp_0055;msp_0056;msp_0057;msp_0058;msp_0065;msp_0066;msp_0068;msp_0071;msp_0072;msp_0074;msp_0075;msp_0076;msp_0077;msp_0082c;msp_0086;msp_0087;msp_0093;msp_0094;msp_0103;msp_0107;msp_0108;msp_0109;msp_0111;msp_0112;msp_0113;msp_0119;msp_0124;ms…	Escherichia coli;[Clostridium] bolteae;Roseburia faecis;Roseburia intestinalis;[Clostridium] clostridioforme 1;Hungatella effluvii;[Eubacterium] eligens;Klebsiella pneumoniae;Lachnospiraceae bacterium hRUG904 / Clostridiales bacterium RUG495 / [Clostridium] sp. CAG:127;Coprococcus eutactus 2;Hungatella hathewayi 1;[Eubacterium] sp. CAG:115;[Eubacterium] sp. CAG:38;unclassified Lachnoclostridium;A…	M00273:PTS system, fructose-specific II component	Phosphotransferase system (PTS)	K00882;K03436;K02770	PTS_IIB;PTS_EIIA_2;PTS_EIIC	-	-	-	-	-	-	K00882;PTS_IIB;K03436;K02770;PTS_EIIA_2;PTS_EIIC
CL-530	3	431	Yes	No	msp_0009;msp_0013;msp_0014;msp_0018;msp_0020;msp_0024;msp_0034;msp_0044;msp_0045;msp_0049;msp_0056;msp_0057;msp_0058;msp_0060;msp_0066;msp_0079;msp_0085;msp_0086;msp_0092;msp_0095;msp_0103;msp_0104;msp_0106;msp_0107;msp_0109;msp_0111;msp_0112;msp_0115c;msp_0119;msp_0121;msp_0124;msp_0125;msp_0126;msp_0129;msp_0131;msp_0134;msp_0147;msp_0150c;msp_0152;msp_0153;msp_0160;msp_0163;msp_0171;msp_0172;m…	[Clostridium] bolteae;Ruminococcus bicirculans;Eisenbergiella tayi;Eisenbergiella massiliensis;[Clostridium] clostridioforme 1;Hungatella effluvii;[Faecalibacterium] sp. CAG:74;Hungatella hathewayi 1;Ruminococcus bromii 2;unclassified Lachnoclostridium;unclassified Lachnoclostridium;Roseburia sp. CAG:45 & sp. 2789STDY5608886;[Ruminococcus] gnavus;Lachnospiraceae bacterium CIM:MAG 844 / Firmicutes…	-	-	K03856	NeuB	lmo1600	-	-	-	-	Chorismate mutase I (EC 5.4.99.5) / 2-keto-3-deoxy-D-arabino-heptulosonate-7-phosphate synthase I beta (EC 2.5.1.54)	K03856;NeuB;lmo1600
CL-573	3	426	Yes	No	msp_0003;msp_0005;msp_0007;msp_0008;msp_0009;msp_0010;msp_0011;msp_0012;msp_0013;msp_0014;msp_0015;msp_0017;msp_0018;msp_0019;msp_0020;msp_0021;msp_0022;msp_0023;msp_0024;msp_0026;msp_0028;msp_0029;msp_0030;msp_0031;msp_0033;msp_0034;msp_0036;msp_0037;msp_0039;msp_0042;msp_0043;msp_0044;msp_0045;msp_0047;msp_0048;msp_0049;msp_0050;msp_0051;msp_0052;msp_0054;msp_0055;msp_0056;msp_0058;msp_0059;msp…	Bacteroides cellulosilyticus;Escherichia coli;Bacteroides ovatus;Bacteroides intestinalis;[Clostridium] bolteae;Bacteroides fragilis 1;Bacteroides thetaiotaomicron;Parabacteroides distasonis;Ruminococcus bicirculans;Eisenbergiella tayi;Roseburia faecis;Roseburia intestinalis;Eisenbergiella massiliensis;Bacteroides faecis;[Clostridium] clostridioforme 1;Bacteroides xylanisolvens;Bacteroides finego…	M00208:Glycine betaine/proline transport system	Mineral and organic ion transport system	K07486	DEDD_Tnp_IS110;Transposase_20	-	-	-	-	-	-	DEDD_Tnp_IS110;Transposase_20;K07486
CL-424	14	415	Yes	No	msp_0009;msp_0013;msp_0034;msp_0042;msp_0045;msp_0053;msp_0056;msp_0058;msp_0065;msp_0079;msp_0086;msp_0103;msp_0105;msp_0106;msp_0109;msp_0112;msp_0113;msp_0126;msp_0127;msp_0132;msp_0133;msp_0141;msp_0147;msp_0150c;msp_0152;msp_0153;msp_0163;msp_0171;msp_0173;msp_0177;msp_0180;msp_0182;msp_0186;msp_0188;msp_0193;msp_0203;msp_0204;msp_0205;msp_0213;msp_0221;msp_0223;msp_0232;msp_0236;msp_0242;ms…	[Clostridium] bolteae;Ruminococcus bicirculans;[Faecalibacterium] sp. CAG:74;Coprococcus eutactus 2;Ruminococcus bromii 2;[Eubacterium] siraeum;unclassified Lachnoclostridium;[Ruminococcus] gnavus;[Ruminococcus] sp. CAG:17 / Blautia sp. 2789STDY5608880;[Clostridium] sp. CAG:7;[Clostridium] symbiosum;[Clostridium] innocuum;Ruminococcus sp. CAG:177;Clostridiales bacterium UBA7273 / Firmicutes bacte…	M00159:V-type ATPase, prokaryotes	ATP synthesis	K02118;K02120;K02121;K02123;K02124;K02119;K02117;K02122	ATP-synt_ab_Xtn;ATP-synt_D;ATP-synt_F;V_ATPase_I;vATP-synt_AC39;vATP-synt_E	-	-	-	-	-	-	K02118;K02120;K02121;K02123;K02124;K02119;ATP-synt_ab_Xtn;ATP-synt_D;ATP-synt_F;V_ATPase_I;vATP-synt_AC39;K02117;K02122;vATP-synt_E
CL-11	3	414	Yes	No	msp_0009;msp_0014;msp_0015;msp_0017;msp_0018;msp_0020;msp_0024;msp_0039;msp_0042;msp_0044;msp_0045;msp_0047;msp_0049;msp_0050;msp_0052;msp_0055;msp_0056;msp_0057;msp_0058;msp_0060;msp_0065;msp_0066;msp_0068;msp_0071;msp_0072;msp_0074;msp_0075;msp_0076;msp_0079;msp_0085;msp_0094;msp_0095;msp_0107;msp_0109;msp_0111;msp_0112;msp_0113;msp_0115c;msp_0121;msp_0124;msp_0125;msp_0126;msp_0127;msp_0133;ms…	[Clostridium] bolteae;Eisenbergiella tayi;Roseburia faecis;Roseburia intestinalis;Eisenbergiella massiliensis;[Clostridium] clostridioforme 1;Hungatella effluvii;Lachnospiraceae bacterium hRUG904 / Clostridiales bacterium RUG495 / [Clostridium] sp. CAG:127;Coprococcus eutactus 2;Hungatella hathewayi 1;Ruminococcus bromii 2;[Eubacterium] sp. CAG:115;unclassified Lachnoclostridium;Anaerobutyricum h…	M00196:Multiple sugar transport system	Saccharide, polyol, and lipid transport system	K10117;K10118;K10119	-	-	-	-	-	-	-	K10117;K10118;K10119
CL-249	4	413	Yes	No	msp_0003;msp_0005;msp_0007;msp_0008;msp_0009;msp_0011;msp_0012;msp_0014;msp_0015;msp_0016;msp_0017;msp_0018;msp_0019;msp_0020;msp_0021;msp_0022;msp_0023;msp_0024;msp_0026;msp_0030;msp_0031;msp_0037;msp_0041;msp_0043;msp_0044;msp_0046;msp_0047;msp_0049;msp_0052;msp_0053;msp_0055;msp_0056;msp_0058;msp_0060;msp_0061;msp_0062;msp_0065;msp_0066;msp_0067;msp_0068;msp_0069;msp_0071;msp_0073;msp_0074;msp…	Bacteroides cellulosilyticus;Escherichia coli;Bacteroides ovatus;Bacteroides intestinalis;[Clostridium] bolteae;Bacteroides thetaiotaomicron;Parabacteroides distasonis;Eisenbergiella tayi;Roseburia faecis;Bacteroides plebeius;Roseburia intestinalis;Eisenbergiella massiliensis;Bacteroides faecis;[Clostridium] clostridioforme 1;Bacteroides xylanisolvens;Bacteroides finegoldii;Bacteroides caccae;Hun…	-	-	K01804;K00853	Arabinose_Iso_C;Arabinose_Isome	-	-	-	-	-	-	K01804;Arabinose_Iso_C;Arabinose_Isome;K00853
CL-311	3	407	Yes	No	msp_0003;msp_0005;msp_0007;msp_0008;msp_0009;msp_0010;msp_0011;msp_0012;msp_0014;msp_0018;msp_0019;msp_0021;msp_0022;msp_0023;msp_0024;msp_0027;msp_0028;msp_0030;msp_0031;msp_0032;msp_0033;msp_0035;msp_0036;msp_0037;msp_0038;msp_0040;msp_0044;msp_0046;msp_0049;msp_0054;msp_0056;msp_0061;msp_0069;msp_0073;msp_0079;msp_0082c;msp_0083;msp_0085;msp_0086;msp_0088;msp_0089;msp_0092;msp_0098;msp_0099;ms…	Bacteroides cellulosilyticus;Escherichia coli;Bacteroides ovatus;Bacteroides intestinalis;[Clostridium] bolteae;Bacteroides fragilis 1;Bacteroides thetaiotaomicron;Parabacteroides distasonis;Eisenbergiella tayi;Eisenbergiella massiliensis;Bacteroides faecis;Bacteroides xylanisolvens;Bacteroides finegoldii;Bacteroides caccae;Hungatella effluvii;Parabacteroides merdae;Parabacteroides goldsteinii;Kl…	-	-	-	PAS_4;PAS_9;PAS	-	-	-	-	-	-	PAS_4;PAS_9;PAS
CL-657	4	386	Yes	No	msp_0009;msp_0014;msp_0017;msp_0018;msp_0020;msp_0024;msp_0025;msp_0038;msp_0044;msp_0049;msp_0050;msp_0052;msp_0056;msp_0057;msp_0065;msp_0070;msp_0071;msp_0074;msp_0076;msp_0079;msp_0085;msp_0087;msp_0092;msp_0094;msp_0099;msp_0104;msp_0106;msp_0109;msp_0110;msp_0112;msp_0116;msp_0119;msp_0120;msp_0121;msp_0129;msp_0131;msp_0134;msp_0141;msp_0142;msp_0144;msp_0145;msp_0152;msp_0153;msp_0158;msp…	[Clostridium] bolteae;Eisenbergiella tayi;Roseburia intestinalis;Eisenbergiella massiliensis;[Clostridium] clostridioforme 1;Hungatella effluvii;Akkermansia muciniphila;unclassified Lentisphaeria;Hungatella hathewayi 1;unclassified Lachnoclostridium;Anaerobutyricum hallii;Blautia sp. CAG:257;unclassified Lachnoclostridium;Roseburia sp. CAG:45 & sp. 2789STDY5608886;[Ruminococcus] sp. CAG:17 / Blau…	-	-	K06898;K09121;K06864	DUF111	-	-	-	-	-	-	K06898;K09121;DUF111;K06864
CL-246	4	381	Yes	No	msp_0003;msp_0005;msp_0007;msp_0008;msp_0009;msp_0010;msp_0011;msp_0014;msp_0016;msp_0018;msp_0019;msp_0020;msp_0021;msp_0022;msp_0023;msp_0024;msp_0025;msp_0026;msp_0030;msp_0032;msp_0033;msp_0036;msp_0037;msp_0038;msp_0040;msp_0041;msp_0044;msp_0046;msp_0047;msp_0049;msp_0052;msp_0053;msp_0054;msp_0055;msp_0056;msp_0057;msp_0058;msp_0059;msp_0061;msp_0063;msp_0064;msp_0065;msp_0067;msp_0069;msp…	Bacteroides cellulosilyticus;Escherichia coli;Bacteroides ovatus;Bacteroides intestinalis;[Clostridium] bolteae;Bacteroides fragilis 1;Bacteroides thetaiotaomicron;Eisenbergiella tayi;Bacteroides plebeius;Eisenbergiella massiliensis;Bacteroides faecis;[Clostridium] clostridioforme 1;Bacteroides xylanisolvens;Bacteroides finegoldii;Bacteroides caccae;Hungatella effluvii;Akkermansia muciniphila;Par…	-	-	K01818	Fucose_iso_C;Fucose_iso_N2;Fucose_iso_N1	-	-	-	-	-	-	Fucose_iso_C;K01818;Fucose_iso_N2;Fucose_iso_N1
CL-556	3	381	Yes	No	msp_0003;msp_0006;msp_0007;msp_0008;msp_0010;msp_0011;msp_0012;msp_0013;msp_0014;msp_0018;msp_0019;msp_0021;msp_0022;msp_0023;msp_0025;msp_0027;msp_0028;msp_0030;msp_0032;msp_0033;msp_0037;msp_0038;msp_0047;msp_0053;msp_0054;msp_0061;msp_0064;msp_0070;msp_0073;msp_0083;msp_0085;msp_0089;msp_0090;msp_0092;msp_0098;msp_0099;msp_0100;msp_0104;msp_0106;msp_0110;msp_0116;msp_0119;msp_0120;msp_0122;msp…	Bacteroides cellulosilyticus;Blastocystis sp. subtype 4;Bacteroides ovatus;Bacteroides intestinalis;Bacteroides fragilis 1;Bacteroides thetaiotaomicron;Parabacteroides distasonis;Ruminococcus bicirculans;Eisenbergiella tayi;Eisenbergiella massiliensis;Bacteroides faecis;Bacteroides xylanisolvens;Bacteroides finegoldii;Bacteroides caccae;Akkermansia muciniphila;Parabacteroides merdae;Parabacteroid…	-	-	K01251	AdoHcyase;AdoHcyase_NAD	-	-	-	-	-	-	AdoHcyase;AdoHcyase_NAD;K01251
CL-117	8	379	Yes	No	msp_0003;msp_0007;msp_0008;msp_0010;msp_0011;msp_0012;msp_0014;msp_0016;msp_0018;msp_0019;msp_0021;msp_0022;msp_0023;msp_0025;msp_0026;msp_0028;msp_0031;msp_0033;msp_0035;msp_0036;msp_0037;msp_0038;msp_0040;msp_0043;msp_0046;msp_0052;msp_0054;msp_0058;msp_0059;msp_0060;msp_0061;msp_0063;msp_0067;msp_0069;msp_0078;msp_0085;msp_0091;msp_0096;msp_0097;msp_0098;msp_0101;msp_0102;msp_0105;msp_0111;msp…	Bacteroides cellulosilyticus;Bacteroides ovatus;Bacteroides intestinalis;Bacteroides fragilis 1;Bacteroides thetaiotaomicron;Parabacteroides distasonis;Eisenbergiella tayi;Bacteroides plebeius;Eisenbergiella massiliensis;Bacteroides faecis;Bacteroides xylanisolvens;Bacteroides finegoldii;Bacteroides caccae;Akkermansia muciniphila;Paraprevotella clara;Parabacteroides goldsteinii;Bacteroides sterco…	-	-	K01206;K15923	Alpha_L_fucos;GHL6;Glyco_hyd_65N_2;DUF4982	-	cazy.GH95;cazy.GH29	-	-	-	-	K01206;cazy.GH95;K15923;Alpha_L_fucos;GHL6;Glyco_hyd_65N_2;cazy.GH29;DUF4982
CL-442	27	376	Yes	No	msp_0050;msp_0052;msp_0065;msp_0074;msp_0076;msp_0125;msp_0129;msp_0131;msp_0142;msp_0154;msp_0162;msp_0164;msp_0178;msp_0181;msp_0189;msp_0205;msp_0208;msp_0244;msp_0250;msp_0262;msp_0265;msp_0269;msp_0272;msp_0274;msp_0282;msp_0286;msp_0299;msp_0306;msp_0307;msp_0323;msp_0325;msp_0371;msp_0388;msp_0389;msp_0413;msp_0424;msp_0436;msp_0440;msp_0441;msp_0450;msp_0452;msp_0453;msp_0462;msp_0468;msp…	Anaerobutyricum hallii;Blautia sp. CAG:257;[Ruminococcus] sp. CAG:17 / Blautia sp. 2789STDY5608880;Roseburia sp. CAG:100 / Lachnospiraceae bacterium CIM:MAG 54;Blautia wexlerae;Firmicutes bacterium CAG:24 / [Clostridium] sp. 2789STDY5834869 & 2789STDY5834922;[Clostridium] sp. CAG:58;Phascolarctobacterium faecium;Blautia sp. CAG:52 & SG-772 & sp. 2789STDY5834917;Fusicatenibacter saccharivorans;unc…	M00122:Cobalamin biosynthesis, cobinamide => cobalamin	Cofactor and vitamin biosynthesis	K00768;K02188;K02190;K02224;K02227;K02231;K02232;K02233;K04720;K05934;K05936;K02189;K06042;K00595;K02226;K03394	CbiC;CbiD;CbiG_C;CbiG_N;CbiJ;CbiK;CobD_Cbib;CobS;CobU;DBI_PRT;CbiX	-	-	-	-	-	-	K00768;K02188;K02190;K02224;K02227;K02231;K02232;K02233;K04720;K05934;K05936;K02189;K06042;CbiC;CbiD;CbiG_C;CbiG_N;CbiJ;CbiK;CobD_Cbib;CobS;CobU;DBI_PRT;K00595;K02226;K03394;CbiX
CL-229	7	375	Yes	No	msp_0003;msp_0005;msp_0007;msp_0008;msp_0009;msp_0010;msp_0011;msp_0012;msp_0014;msp_0016;msp_0018;msp_0019;msp_0020;msp_0021;msp_0022;msp_0023;msp_0024;msp_0025;msp_0027;msp_0028;msp_0030;msp_0031;msp_0032;msp_0033;msp_0036;msp_0037;msp_0038;msp_0040;msp_0043;msp_0044;msp_0046;msp_0049;msp_0051;msp_0054;msp_0056;msp_0059;msp_0061;msp_0062;msp_0063;msp_0064;msp_0067;msp_0069;msp_0070;msp_0081;msp…	Bacteroides cellulosilyticus;Escherichia coli;Bacteroides ovatus;Bacteroides intestinalis;[Clostridium] bolteae;Bacteroides fragilis 1;Bacteroides thetaiotaomicron;Parabacteroides distasonis;Eisenbergiella tayi;Bacteroides plebeius;Eisenbergiella massiliensis;Bacteroides faecis;[Clostridium] clostridioforme 1;Bacteroides xylanisolvens;Bacteroides finegoldii;Bacteroides caccae;Hungatella effluvii;…	M00307:Pyruvate oxidation, pyruvate => acetyl-CoA ;M00011:Citrate cycle, second carbon oxidation, 2-oxoglutarate => oxaloacetate ;M00036:Leucine degradation, leucine => acetoacetate + acetyl-CoA	Central carbohydrate metabolism;Branched-chain amino acid metabolism	K00605;K02437;K00382	GCV_H;GCV_T;GCV_T_C;GDC-P	-	-	-	-	-	-	K00605;K02437;GCV_H;GCV_T;GCV_T_C;GDC-P;K00382
CL-401	3	373	Yes	No	msp_0003;msp_0005;msp_0007;msp_0008;msp_0009;msp_0011;msp_0012;msp_0013;msp_0014;msp_0015;msp_0016;msp_0018;msp_0019;msp_0020;msp_0022;msp_0024;msp_0028;msp_0030;msp_0031;msp_0037;msp_0042;msp_0043;msp_0044;msp_0046;msp_0047;msp_0049;msp_0050;msp_0052;msp_0054;msp_0055;msp_0056;msp_0057;msp_0058;msp_0060;msp_0061;msp_0063;msp_0065;msp_0067;msp_0068;msp_0072;msp_0074;msp_0076;msp_0077;msp_0078;msp…	Bacteroides cellulosilyticus;Escherichia coli;Bacteroides ovatus;Bacteroides intestinalis;[Clostridium] bolteae;Bacteroides thetaiotaomicron;Parabacteroides distasonis;Ruminococcus bicirculans;Eisenbergiella tayi;Roseburia faecis;Bacteroides plebeius;Eisenbergiella massiliensis;Bacteroides faecis;[Clostridium] clostridioforme 1;Bacteroides finegoldii;Hungatella effluvii;Parabacteroides goldsteini…	-	-	K01193	Glyco_hydro_32C	-	cazy.GH32	-	-	-	-	K01193;Glyco_hydro_32C;cazy.GH32
CL-115	4	372	Yes	No	msp_0003;msp_0007;msp_0008;msp_0009;msp_0011;msp_0014;msp_0016;msp_0017;msp_0018;msp_0019;msp_0020;msp_0021;msp_0022;msp_0023;msp_0024;msp_0026;msp_0027;msp_0029;msp_0032;msp_0034;msp_0035;msp_0036;msp_0037;msp_0038;msp_0044;msp_0048;msp_0049;msp_0051;msp_0054;msp_0055;msp_0058;msp_0061;msp_0063;msp_0066;msp_0067;msp_0069;msp_0071;msp_0072;msp_0073;msp_0074;msp_0075;msp_0077;msp_0078;msp_0079;msp…	Bacteroides cellulosilyticus;Bacteroides ovatus;Bacteroides intestinalis;[Clostridium] bolteae;Bacteroides thetaiotaomicron;Eisenbergiella tayi;Bacteroides plebeius;Roseburia intestinalis;Eisenbergiella massiliensis;Bacteroides faecis;[Clostridium] clostridioforme 1;Bacteroides xylanisolvens;Bacteroides finegoldii;Bacteroides caccae;Hungatella effluvii;Paraprevotella clara;Parabacteroides merdae;…	-	-	K01213	Glyco_hydro_28;Pectate_lyase_3	-	cazy.GH28	-	-	-	-	Glyco_hydro_28;K01213;Pectate_lyase_3;cazy.GH28
CL-240	3	372	Yes	No	msp_0003;msp_0007;msp_0008;msp_0009;msp_0010;msp_0011;msp_0012;msp_0013;msp_0014;msp_0015;msp_0016;msp_0017;msp_0018;msp_0019;msp_0021;msp_0022;msp_0023;msp_0024;msp_0026;msp_0027;msp_0028;msp_0031;msp_0032;msp_0033;msp_0034;msp_0035;msp_0036;msp_0037;msp_0041;msp_0043;msp_0044;msp_0046;msp_0047;msp_0051;msp_0053;msp_0054;msp_0056;msp_0058;msp_0059;msp_0060;msp_0061;msp_0062;msp_0065;msp_0068;msp…	Bacteroides cellulosilyticus;Bacteroides ovatus;Bacteroides intestinalis;[Clostridium] bolteae;Bacteroides fragilis 1;Bacteroides thetaiotaomicron;Parabacteroides distasonis;Ruminococcus bicirculans;Eisenbergiella tayi;Roseburia faecis;Bacteroides plebeius;Roseburia intestinalis;Eisenbergiella massiliensis;Bacteroides faecis;Bacteroides xylanisolvens;Bacteroides finegoldii;Bacteroides caccae;Hung…	-	-	K01209	Alpha-L-AF_C	-	cazy.GH51	-	-	-	-	K01209;Alpha-L-AF_C;cazy.GH51
CL-120	6	370	Yes	No	msp_0009;msp_0013;msp_0014;msp_0015;msp_0018;msp_0020;msp_0024;msp_0029;msp_0039;msp_0042;msp_0044;msp_0047;msp_0049;msp_0050;msp_0053;msp_0055;msp_0056;msp_0057;msp_0060;msp_0065;msp_0066;msp_0068;msp_0072;msp_0074;msp_0075;msp_0077;msp_0079;msp_0085;msp_0086;msp_0093;msp_0103;msp_0109;msp_0110;msp_0113;msp_0115c;msp_0119;msp_0127;msp_0130;msp_0131;msp_0132;msp_0133;msp_0135;msp_0141;msp_0142;ms…	[Clostridium] bolteae;Ruminococcus bicirculans;Eisenbergiella tayi;Roseburia faecis;Eisenbergiella massiliensis;[Clostridium] clostridioforme 1;Hungatella effluvii;[Eubacterium] eligens;Lachnospiraceae bacterium hRUG904 / Clostridiales bacterium RUG495 / [Clostridium] sp. CAG:127;Coprococcus eutactus 2;Hungatella hathewayi 1;[Eubacterium] sp. CAG:115;unclassified Lachnoclostridium;Anaerobutyricum…	M00331:Type II general secretion system	Bacterial secretion system	K02669;K02653;K02654;K07814	Peptidase_A24;HD_5	-	-	-	-	-	-	K02669;K02653;Peptidase_A24;K02654;HD_5;K07814
CL-485	5	365	Yes	No	msp_0003;msp_0004;msp_0005;msp_0007;msp_0008;msp_0009;msp_0010;msp_0011;msp_0012;msp_0014;msp_0017;msp_0018;msp_0019;msp_0020;msp_0022;msp_0024;msp_0026;msp_0028;msp_0032;msp_0033;msp_0036;msp_0037;msp_0038;msp_0041;msp_0043;msp_0044;msp_0046;msp_0049;msp_0054;msp_0055;msp_0056;msp_0060;msp_0065;msp_0066;msp_0073;msp_0074;msp_0075;msp_0081;msp_0084;msp_0085;msp_0089;msp_0091;msp_0094;msp_0096;msp…	Bacteroides cellulosilyticus;Blastocystis sp. subtype 2;Escherichia coli;Bacteroides ovatus;Bacteroides intestinalis;[Clostridium] bolteae;Bacteroides fragilis 1;Bacteroides thetaiotaomicron;Parabacteroides distasonis;Eisenbergiella tayi;Roseburia intestinalis;Eisenbergiella massiliensis;Bacteroides faecis;[Clostridium] clostridioforme 1;Bacteroides finegoldii;Hungatella effluvii;Paraprevotella c…	-	-	K01191	Alpha-mann_mid;Glyco_hydro_38C;Glyco_hydro_38N	-	cazy.GH38	-	-	-	-	K01191;Alpha-mann_mid;Glyco_hydro_38C;Glyco_hydro_38N;cazy.GH38
CL-222	6	364	Yes	No	msp_0003;msp_0005;msp_0007;msp_0008;msp_0009;msp_0011;msp_0014;msp_0016;msp_0017;msp_0018;msp_0019;msp_0020;msp_0021;msp_0022;msp_0023;msp_0024;msp_0026;msp_0027;msp_0028;msp_0029;msp_0030;msp_0031;msp_0034;msp_0036;msp_0037;msp_0038;msp_0041;msp_0043;msp_0044;msp_0046;msp_0048;msp_0049;msp_0054;msp_0055;msp_0056;msp_0058;msp_0061;msp_0063;msp_0066;msp_0067;msp_0069;msp_0071;msp_0072;msp_0074;msp…	Bacteroides cellulosilyticus;Escherichia coli;Bacteroides ovatus;Bacteroides intestinalis;[Clostridium] bolteae;Bacteroides thetaiotaomicron;Eisenbergiella tayi;Bacteroides plebeius;Roseburia intestinalis;Eisenbergiella massiliensis;Bacteroides faecis;[Clostridium] clostridioforme 1;Bacteroides xylanisolvens;Bacteroides finegoldii;Bacteroides caccae;Hungatella effluvii;Paraprevotella clara;Paraba…	M00631:D-Galacturonate degradation (bacteria)	Other carbohydrate metabolism	K01685;K00041	GD_AH_C;Mannitol_dh;Mannitol_dh_C;SAF	-	-	-	-	-	-	K01685;GD_AH_C;Mannitol_dh;Mannitol_dh_C;K00041;SAF
CL-270	4	361	Yes	No	msp_0009;msp_0014;msp_0015;msp_0017;msp_0018;msp_0020;msp_0024;msp_0029;msp_0039;msp_0042;msp_0044;msp_0049;msp_0050;msp_0052;msp_0055;msp_0056;msp_0057;msp_0058;msp_0060;msp_0065;msp_0068;msp_0071;msp_0072;msp_0074;msp_0075;msp_0076;msp_0077;msp_0085;msp_0086;msp_0093;msp_0094;msp_0107;msp_0109;msp_0111;msp_0112;msp_0113;msp_0125;msp_0126;msp_0129;msp_0133;msp_0141;msp_0142;msp_0146c;msp_0152;ms…	[Clostridium] bolteae;Eisenbergiella tayi;Roseburia faecis;Roseburia intestinalis;Eisenbergiella massiliensis;[Clostridium] clostridioforme 1;Hungatella effluvii;[Eubacterium] eligens;Lachnospiraceae bacterium hRUG904 / Clostridiales bacterium RUG495 / [Clostridium] sp. CAG:127;Coprococcus eutactus 2;Hungatella hathewayi 1;unclassified Lachnoclostridium;Anaerobutyricum hallii;Blautia sp. CAG:257;…	-	-	K03700;K19225	RecU;DNA_pol3_a_NI	-	-	-	-	-	-	K03700;RecU;K19225;DNA_pol3_a_NI
CL-422	3	359	Yes	No	msp_0013;msp_0045;msp_0047;msp_0053;msp_0095;msp_0105;msp_0106;msp_0121;msp_0127;msp_0147;msp_0150c;msp_0178;msp_0192;msp_0203;msp_0205;msp_0210;msp_0213;msp_0222;msp_0240;msp_0249;msp_0252;msp_0262;msp_0269;msp_0270;msp_0271;msp_0276;msp_0277;msp_0282;msp_0285;msp_0286;msp_0290;msp_0291;msp_0297;msp_0302;msp_0303;msp_0306;msp_0311;msp_0312;msp_0317;msp_0319;msp_0322;msp_0325;msp_0331;msp_0333;ms…	Ruminococcus bicirculans;Ruminococcus bromii 2;[Eubacterium] sp. CAG:115;[Eubacterium] siraeum;unclassified Ruminococcaceae;Ruminococcus sp. CAG:177;Clostridiales bacterium UBA7273 / Firmicutes bacterium CAG:240;Oscillibacter sp. CAG:241_62_21;Ruminococcus sp. CAG:353 & sp. 2789STDY5834938;unclassified Ruminococcaceae;[Clostridium] methylpentosum;Ruminococcus sp. A254.MGS-254 & CAG:254;unclassifi…	-	-	K03697;K09769	YmdB	-	-	-	-	-	-	K03697;K09769;YmdB
CL-512	4	349	Yes	No	msp_0003;msp_0007;msp_0008;msp_0009;msp_0010;msp_0011;msp_0012;msp_0015;msp_0016;msp_0019;msp_0021;msp_0022;msp_0023;msp_0025;msp_0026;msp_0027;msp_0028;msp_0031;msp_0033;msp_0035;msp_0036;msp_0037;msp_0039;msp_0040;msp_0041;msp_0043;msp_0045;msp_0046;msp_0048;msp_0049;msp_0051;msp_0055;msp_0058;msp_0059;msp_0063;msp_0066;msp_0067;msp_0074;msp_0075;msp_0077;msp_0078;msp_0080;msp_0084;msp_0088;msp…	Bacteroides cellulosilyticus;Bacteroides ovatus;Bacteroides intestinalis;[Clostridium] bolteae;Bacteroides fragilis 1;Bacteroides thetaiotaomicron;Parabacteroides distasonis;Roseburia faecis;Bacteroides plebeius;Bacteroides faecis;Bacteroides xylanisolvens;Bacteroides finegoldii;Bacteroides caccae;Akkermansia muciniphila;Paraprevotella clara;Parabacteroides merdae;Parabacteroides goldsteinii;Bact…	-	-	-	Caps_synth;Gly_transf_sug;TcdA_TcdB	-	cazy.GT32	-	-	-	-	Caps_synth;Gly_transf_sug;TcdA_TcdB;cazy.GT32
CL-544	4	348	Yes	No	msp_0005;msp_0009;msp_0014;msp_0015;msp_0017;msp_0018;msp_0020;msp_0024;msp_0030;msp_0034;msp_0039;msp_0042;msp_0044;msp_0049;msp_0050;msp_0055;msp_0056;msp_0057;msp_0060;msp_0066;msp_0068;msp_0071;msp_0072;msp_0074;msp_0075;msp_0077;msp_0079;msp_0085;msp_0094;msp_0100;msp_0105;msp_0108;msp_0109;msp_0111;msp_0113;msp_0124;msp_0125;msp_0126;msp_0129;msp_0133;msp_0140;msp_0142;msp_0154;msp_0157;msp…	Escherichia coli;[Clostridium] bolteae;Eisenbergiella tayi;Roseburia faecis;Roseburia intestinalis;Eisenbergiella massiliensis;[Clostridium] clostridioforme 1;Hungatella effluvii;Klebsiella pneumoniae;[Faecalibacterium] sp. CAG:74;Lachnospiraceae bacterium hRUG904 / Clostridiales bacterium RUG495 / [Clostridium] sp. CAG:127;Coprococcus eutactus 2;Hungatella hathewayi 1;unclassified Lachnoclostrid…	M00852:Vibrio cholerae pathogenicity signature, toxin coregulated pilus	Pathogenicity	K10540;K10541;K10542	-	Z3404	-	-	-	-	Galactose/methyl galactoside ABC transporter, ATP-binding protein MglA (EC 3.6.3.17)	K10540;K10541;K10542;Z3404
CL-1329	3	346	Yes	No	msp_0005;msp_0009;msp_0012;msp_0014;msp_0017;msp_0018;msp_0020;msp_0023;msp_0024;msp_0027;msp_0028;msp_0030;msp_0037;msp_0038;msp_0044;msp_0049;msp_0052;msp_0054;msp_0055;msp_0056;msp_0058;msp_0060;msp_0061;msp_0065;msp_0071;msp_0072;msp_0073;msp_0082c;msp_0083;msp_0085;msp_0086;msp_0093;msp_0094;msp_0098;msp_0099;msp_0104;msp_0106;msp_0108;msp_0110;msp_0111;msp_0112;msp_0113;msp_0116;msp_0120;ms…	Escherichia coli;[Clostridium] bolteae;Parabacteroides distasonis;Eisenbergiella tayi;Roseburia intestinalis;Eisenbergiella massiliensis;[Clostridium] clostridioforme 1;Bacteroides caccae;Hungatella effluvii;Parabacteroides merdae;Parabacteroides goldsteinii;Klebsiella pneumoniae;Bacteroides salyersiae;unclassified Lentisphaeria;Hungatella hathewayi 1;unclassified Lachnoclostridium;Blautia sp. CA…	-	-	K13641	HTH_IclR;IclR	-	-	-	-	-	-	HTH_IclR;IclR;K13641
CL-547	3	343	Yes	No	msp_0009;msp_0014;msp_0017;msp_0018;msp_0020;msp_0024;msp_0030;msp_0034;msp_0044;msp_0049;msp_0056;msp_0066;msp_0070;msp_0073;msp_0074;msp_0079;msp_0082c;msp_0085;msp_0086;msp_0092;msp_0100;msp_0103;msp_0104;msp_0111;msp_0113;msp_0116;msp_0120;msp_0121;msp_0127;msp_0129;msp_0131;msp_0132;msp_0134;msp_0135;msp_0140;msp_0145;msp_0150c;msp_0153;msp_0157;msp_0159;msp_0167c;msp_0173;msp_0174;msp_0177;…	[Clostridium] bolteae;Eisenbergiella tayi;Roseburia intestinalis;Eisenbergiella massiliensis;[Clostridium] clostridioforme 1;Hungatella effluvii;Klebsiella pneumoniae;[Faecalibacterium] sp. CAG:74;Hungatella hathewayi 1;unclassified Lachnoclostridium;unclassified Lachnoclostridium;[Clostridium] sp. AT4;Akkermansia muciniphila 2;Victivallales bacterium CCUG 44730;Roseburia sp. CAG:100 / Lachnospir…	-	-	K02011;K02012;K02010	-	-	-	-	-	-	-	K02011;K02012;K02010
CL-596	3	341	Yes	No	msp_0003;msp_0005;msp_0007;msp_0008;msp_0010;msp_0011;msp_0012;msp_0015;msp_0018;msp_0019;msp_0021;msp_0022;msp_0023;msp_0025;msp_0026;msp_0027;msp_0028;msp_0029;msp_0030;msp_0031;msp_0032;msp_0033;msp_0034;msp_0035;msp_0036;msp_0037;msp_0038;msp_0039;msp_0040;msp_0041;msp_0042;msp_0045;msp_0046;msp_0047;msp_0048;msp_0050;msp_0051;msp_0053;msp_0054;msp_0055;msp_0056;msp_0059;msp_0060;msp_0061;msp…	Bacteroides cellulosilyticus;Escherichia coli;Bacteroides ovatus;Bacteroides intestinalis;Bacteroides fragilis 1;Bacteroides thetaiotaomicron;Parabacteroides distasonis;Roseburia faecis;Eisenbergiella massiliensis;Bacteroides faecis;Bacteroides xylanisolvens;Bacteroides finegoldii;Bacteroides caccae;Akkermansia muciniphila;Paraprevotella clara;Parabacteroides merdae;Parabacteroides goldsteinii;[E…	M00440:Nickel transport system	Peptide and nickel transport system	K07154	Couple_hipA;HipA_C	-	-	-	-	-	-	Couple_hipA;HipA_C;K07154
CL-533	3	334	Yes	No	msp_0005;msp_0009;msp_0014;msp_0015;msp_0017;msp_0018;msp_0024;msp_0029;msp_0030;msp_0032;msp_0039;msp_0042;msp_0048;msp_0049;msp_0050;msp_0052;msp_0056;msp_0057;msp_0058;msp_0060;msp_0066;msp_0068;msp_0071;msp_0072;msp_0074;msp_0075;msp_0076;msp_0077;msp_0079;msp_0082c;msp_0087;msp_0090;msp_0093;msp_0094;msp_0100;msp_0103;msp_0105;msp_0107;msp_0108;msp_0109;msp_0111;msp_0112;msp_0115c;msp_0116;m…	Escherichia coli;[Clostridium] bolteae;Eisenbergiella tayi;Roseburia faecis;Roseburia intestinalis;Eisenbergiella massiliensis;Hungatella effluvii;[Eubacterium] eligens;Klebsiella pneumoniae;Alistipes onderdonkii;Lachnospiraceae bacterium hRUG904 / Clostridiales bacterium RUG495 / [Clostridium] sp. CAG:127;Coprococcus eutactus 2;[Eubacterium] sp. CAG:38;unclassified Lachnoclostridium;Anaerobutyri…	-	-	K03704	CSD	SL1344_0617	-	-	-	-	Cold shock protein of CSP family => CspE (naming convention as in E.coli)	K03704;CSD;SL1344_0617
CL-486	4	329	Yes	No	msp_0005;msp_0009;msp_0014;msp_0018;msp_0020;msp_0024;msp_0030;msp_0034;msp_0038;msp_0044;msp_0049;msp_0065;msp_0066;msp_0073;msp_0075;msp_0079;msp_0085;msp_0099;msp_0103;msp_0105;msp_0113;msp_0116;msp_0120;msp_0124;msp_0126;msp_0127;msp_0135;msp_0140;msp_0141;msp_0142;msp_0157;msp_0159;msp_0162;msp_0163;msp_0172;msp_0174;msp_0180;msp_0182;msp_0185;msp_0213;msp_0218;msp_0227;msp_0241;msp_0248;msp…	Escherichia coli;[Clostridium] bolteae;Eisenbergiella tayi;Eisenbergiella massiliensis;[Clostridium] clostridioforme 1;Hungatella effluvii;Klebsiella pneumoniae;[Faecalibacterium] sp. CAG:74;unclassified Lentisphaeria;Hungatella hathewayi 1;unclassified Lachnoclostridium;[Ruminococcus] sp. CAG:17 / Blautia sp. 2789STDY5608880;[Clostridium] sp. AT4;Victivallales bacterium CCUG 44730;Lachnospiracea…	-	-	K07406	Glyco_hydro_4;Glyco_hydro_4C	-	cazy.GH4	-	-	-	-	K07406;Glyco_hydro_4;Glyco_hydro_4C;cazy.GH4
CL-369	3	327	Yes	No	msp_0003;msp_0005;msp_0008;msp_0010;msp_0011;msp_0012;msp_0014;msp_0015;msp_0016;msp_0017;msp_0018;msp_0019;msp_0020;msp_0021;msp_0022;msp_0024;msp_0026;msp_0027;msp_0028;msp_0032;msp_0033;msp_0034;msp_0035;msp_0036;msp_0037;msp_0038;msp_0041;msp_0043;msp_0044;msp_0046;msp_0051;msp_0053;msp_0056;msp_0060;msp_0061;msp_0062;msp_0063;msp_0067;msp_0068;msp_0069;msp_0071;msp_0073;msp_0076;msp_0077;msp…	Bacteroides cellulosilyticus;Escherichia coli;Bacteroides intestinalis;Bacteroides fragilis 1;Bacteroides thetaiotaomicron;Parabacteroides distasonis;Eisenbergiella tayi;Roseburia faecis;Bacteroides plebeius;Roseburia intestinalis;Eisenbergiella massiliensis;Bacteroides faecis;[Clostridium] clostridioforme 1;Bacteroides xylanisolvens;Bacteroides finegoldii;Hungatella effluvii;Paraprevotella clara…	-	-	K09955	Glyco_hydro_127	-	cazy.GH127	-	-	-	-	K09955;Glyco_hydro_127;cazy.GH127
CL-549	3	320	Yes	No	msp_0001;msp_0003;msp_0007;msp_0008;msp_0010;msp_0011;msp_0012;msp_0015;msp_0016;msp_0017;msp_0019;msp_0021;msp_0022;msp_0023;msp_0025;msp_0026;msp_0027;msp_0028;msp_0029;msp_0031;msp_0033;msp_0035;msp_0036;msp_0037;msp_0038;msp_0040;msp_0041;msp_0043;msp_0046;msp_0047;msp_0051;msp_0053;msp_0054;msp_0059;msp_0061;msp_0063;msp_0064;msp_0067;msp_0068;msp_0069;msp_0070;msp_0071;msp_0072;msp_0076;msp…	Blastocystis sp. subtype 3;Bacteroides cellulosilyticus;Bacteroides ovatus;Bacteroides intestinalis;Bacteroides fragilis 1;Bacteroides thetaiotaomicron;Parabacteroides distasonis;Roseburia faecis;Bacteroides plebeius;Roseburia intestinalis;Bacteroides faecis;Bacteroides xylanisolvens;Bacteroides finegoldii;Bacteroides caccae;Akkermansia muciniphila;Paraprevotella clara;Parabacteroides merdae;Para…	-	-	K12251;K10536	PAD_porph	-	-	-	-	-	-	K12251;PAD_porph;K10536
CL-567	3	317	Yes	No	msp_0003;msp_0005;msp_0008;msp_0011;msp_0012;msp_0019;msp_0027;msp_0028;msp_0030;msp_0031;msp_0034;msp_0036;msp_0037;msp_0046;msp_0054;msp_0063;msp_0064;msp_0072;msp_0077;msp_0082c;msp_0083;msp_0098;msp_0100;msp_0103;msp_0105;msp_0108;msp_0111;msp_0115c;msp_0140;msp_0143;msp_0144;msp_0145;msp_0154;msp_0155;msp_0156;msp_0157;msp_0160;msp_0167c;msp_0170;msp_0173;msp_0174;msp_0185;msp_0202;msp_0203;…	Bacteroides cellulosilyticus;Escherichia coli;Bacteroides intestinalis;Bacteroides thetaiotaomicron;Parabacteroides distasonis;Bacteroides faecis;Parabacteroides merdae;Parabacteroides goldsteinii;Klebsiella pneumoniae;Bacteroides stercoris;[Faecalibacterium] sp. CAG:74;Bacteroides eggerthii;Bacteroides salyersiae;Bacteroides uniformis;Bacteroides nordii;Bacteroides clarus;unclassified Bacteroida…	M00454:KdpD-KdpE (potassium transport) two-component regulatory system	Two-component regulatory system	K03592;K03568	PmbA_TldD	-	-	-	-	-	-	K03592;PmbA_TldD;K03568
CL-139	3	316	Yes	No	msp_0013;msp_0045;msp_0047;msp_0053;msp_0095;msp_0106;msp_0124;msp_0127;msp_0147;msp_0172;msp_0178;msp_0203;msp_0205;msp_0210;msp_0213;msp_0222;msp_0249;msp_0252;msp_0262;msp_0265;msp_0269;msp_0270;msp_0271;msp_0276;msp_0277;msp_0282;msp_0285;msp_0286;msp_0291;msp_0297;msp_0301;msp_0302;msp_0303;msp_0311;msp_0312;msp_0317;msp_0319;msp_0325;msp_0340;msp_0342;msp_0345;msp_0350;msp_0356;msp_0357;msp…	Ruminococcus bicirculans;Ruminococcus bromii 2;[Eubacterium] sp. CAG:115;[Eubacterium] siraeum;unclassified Ruminococcaceae;Clostridiales bacterium UBA7273 / Firmicutes bacterium CAG:240;Candidatus Cibiobacter qucibialis;Ruminococcus sp. CAG:353 & sp. 2789STDY5834938;unclassified Ruminococcaceae;Ruthenibacterium lactatiformans;Ruminococcus sp. A254.MGS-254 & CAG:254;Negativibacillus massiliensis;…	-	-	K04074;K06295;K01408	-	-	-	-	-	-	-	K04074;K06295;K01408
CL-1439	3	316	Yes	No	msp_0005;msp_0014;msp_0018;msp_0023;msp_0030;msp_0035;msp_0073;msp_0082c;msp_0085;msp_0092;msp_0100;msp_0103;msp_0108;msp_0110;msp_0116;msp_0119;msp_0131;msp_0132;msp_0134;msp_0140;msp_0145;msp_0146c;msp_0153;msp_0157;msp_0159;msp_0160;msp_0164;msp_0170;msp_0174;msp_0181;msp_0183;msp_0188;msp_0195;msp_0197;msp_0202;msp_0209;msp_0210;msp_0220;msp_0221;msp_0226;msp_0228;msp_0234;msp_0239;msp_0241;m…	Escherichia coli;Eisenbergiella tayi;Eisenbergiella massiliensis;Bacteroides caccae;Klebsiella pneumoniae;Bacteroides dorei;Victivallales bacterium CCUG 44730;Providencia rettgeri 2;unclassified Eisenbergiella;Sutterella wadsworthensis 1;Morganella morganii;[Clostridium] innocuum;Enterobacter hormaechei;Bilophila wadsworthia;unclassified Lentisphaeria;unclassified Acidaminococcaceae;Phascolarctob…	-	-	K10563	Fapy_DNA_glyco;H2TH	-	-	-	-	-	-	Fapy_DNA_glyco;H2TH;K10563
CL-196	3	314	Yes	No	msp_0003;msp_0007;msp_0008;msp_0009;msp_0010;msp_0011;msp_0012;msp_0013;msp_0015;msp_0016;msp_0017;msp_0019;msp_0020;msp_0022;msp_0023;msp_0024;msp_0027;msp_0031;msp_0032;msp_0034;msp_0036;msp_0038;msp_0040;msp_0043;msp_0044;msp_0045;msp_0047;msp_0053;msp_0056;msp_0057;msp_0059;msp_0063;msp_0066;msp_0067;msp_0074;msp_0077;msp_0082c;msp_0083;msp_0089;msp_0091;msp_0093;msp_0097;msp_0102;msp_0103;ms…	Bacteroides cellulosilyticus;Bacteroides ovatus;Bacteroides intestinalis;[Clostridium] bolteae;Bacteroides fragilis 1;Bacteroides thetaiotaomicron;Parabacteroides distasonis;Ruminococcus bicirculans;Roseburia faecis;Bacteroides plebeius;Roseburia intestinalis;Bacteroides faecis;[Clostridium] clostridioforme 1;Bacteroides finegoldii;Bacteroides caccae;Hungatella effluvii;Parabacteroides merdae;Bac…	-	-	K06909	Terminase_3;Terminase_6	-	-	-	-	-	-	Terminase_3;Terminase_6;K06909
CL-339	9	313	Yes	No	msp_0003;msp_0009;msp_0012;msp_0013;msp_0014;msp_0015;msp_0018;msp_0019;msp_0020;msp_0024;msp_0025;msp_0027;msp_0034;msp_0035;msp_0038;msp_0040;msp_0042;msp_0044;msp_0045;msp_0048;msp_0049;msp_0050;msp_0052;msp_0053;msp_0056;msp_0058;msp_0064;msp_0066;msp_0068;msp_0070;msp_0071;msp_0074;msp_0085;msp_0086;msp_0093;msp_0103;msp_0104;msp_0107;msp_0109;msp_0111;msp_0112;msp_0113;msp_0114;msp_0121;msp…	Bacteroides cellulosilyticus;[Clostridium] bolteae;Parabacteroides distasonis;Ruminococcus bicirculans;Eisenbergiella tayi;Roseburia faecis;Eisenbergiella massiliensis;Bacteroides faecis;[Clostridium] clostridioforme 1;Hungatella effluvii;Akkermansia muciniphila;Parabacteroides merdae;[Faecalibacterium] sp. CAG:74;Bacteroides dorei;unclassified Lentisphaeria;Bacteroides massiliensis;Coprococcus e…	-	-	K07464;K19117;K19118;K19119;K07012	Cas_Cas4;Cas_Cas5d;Cas_Cas7;Cas_Csd1	-	-	-	-	-	-	K07464;K19117;K19118;K19119;Cas_Cas4;Cas_Cas5d;Cas_Cas7;Cas_Csd1;K07012
CL-24	3	311	Yes	No	msp_0003;msp_0007;msp_0008;msp_0009;msp_0011;msp_0012;msp_0014;msp_0016;msp_0018;msp_0019;msp_0020;msp_0023;msp_0024;msp_0026;msp_0033;msp_0037;msp_0042;msp_0043;msp_0044;msp_0046;msp_0051;msp_0056;msp_0058;msp_0059;msp_0064;msp_0066;msp_0069;msp_0085;msp_0086;msp_0088;msp_0096;msp_0097;msp_0101;msp_0104;msp_0110;msp_0117;msp_0119;msp_0128;msp_0129;msp_0134;msp_0147;msp_0166;msp_0167c;msp_0170;ms…	Bacteroides cellulosilyticus;Bacteroides ovatus;Bacteroides intestinalis;[Clostridium] bolteae;Bacteroides thetaiotaomicron;Parabacteroides distasonis;Eisenbergiella tayi;Bacteroides plebeius;Eisenbergiella massiliensis;Bacteroides faecis;[Clostridium] clostridioforme 1;Bacteroides caccae;Hungatella effluvii;Paraprevotella clara;Bacteroides fragilis 2;Bacteroides salyersiae;Coprococcus eutactus 2…	-	-	K07220;K03306	PhoU_div	-	-	-	-	-	-	K07220;PhoU_div;K03306
CL-663	5	309	Yes	No	msp_0001;msp_0002;msp_0004;msp_0005;msp_0006;msp_0009;msp_0010;msp_0012;msp_0013;msp_0014;msp_0016;msp_0022;msp_0023;msp_0025;msp_0027;msp_0030;msp_0031;msp_0032;msp_0033;msp_0034;msp_0035;msp_0037;msp_0038;msp_0039;msp_0041;msp_0043;msp_0051;msp_0053;msp_0054;msp_0061;msp_0062;msp_0070;msp_0073;msp_0082c;msp_0083;msp_0092;msp_0103;msp_0107;msp_0108;msp_0116;msp_0117;msp_0120;msp_0128;msp_0147;ms…	Blastocystis sp. subtype 3;Blastocystis sp. subtype 1;Blastocystis sp. subtype 2;Escherichia coli;Blastocystis sp. subtype 4;[Clostridium] bolteae;Bacteroides fragilis 1;Parabacteroides distasonis;Ruminococcus bicirculans;Eisenbergiella tayi;Bacteroides plebeius;Bacteroides finegoldii;Bacteroides caccae;Akkermansia muciniphila;Parabacteroides merdae;Klebsiella pneumoniae;Bacteroides stercoris;Ali…	M00807:PTS system, galactose-specific II component	Phosphotransferase system (PTS)	-	Ank_2;Ank_3;Ank_4;Ank_5;Ank	-	-	-	-	-	-	Ank_2;Ank_3;Ank_4;Ank_5;Ank
CL-656	4	309	Yes	No	msp_0005;msp_0010;msp_0013;msp_0015;msp_0017;msp_0024;msp_0029;msp_0039;msp_0043;msp_0050;msp_0053;msp_0055;msp_0063;msp_0065;msp_0066;msp_0068;msp_0071;msp_0074;msp_0075;msp_0076;msp_0079;msp_0086;msp_0087;msp_0091;msp_0092;msp_0103;msp_0107;msp_0111;msp_0112;msp_0125;msp_0134;msp_0136;msp_0138;msp_0141;msp_0142;msp_0145;msp_0151;msp_0153;msp_0154;msp_0160;msp_0161;msp_0162;msp_0163;msp_0164;msp…	Escherichia coli;Bacteroides fragilis 1;Ruminococcus bicirculans;Roseburia faecis;Roseburia intestinalis;Hungatella effluvii;[Eubacterium] eligens;Lachnospiraceae bacterium hRUG904 / Clostridiales bacterium RUG495 / [Clostridium] sp. CAG:127;Bacteroides coprocola;Anaerobutyricum hallii;[Eubacterium] siraeum;Firmicutes bacterium CAG:65 / [Clostridium] sp. 2789STDY5608883;Bacteroides clarus;[Rumino…	-	-	K07496	HTH_OrfB_IS605;OrfB_IS605;OrfB_Zn_ribbon	-	-	-	-	-	-	HTH_OrfB_IS605;OrfB_IS605;OrfB_Zn_ribbon;K07496
CL-125	3	306	Yes	No	msp_0001;msp_0002;msp_0003;msp_0006;msp_0007;msp_0008;msp_0009;msp_0010;msp_0011;msp_0012;msp_0014;msp_0016;msp_0017;msp_0018;msp_0019;msp_0021;msp_0022;msp_0023;msp_0024;msp_0025;msp_0026;msp_0028;msp_0031;msp_0033;msp_0035;msp_0036;msp_0037;msp_0038;msp_0040;msp_0041;msp_0044;msp_0046;msp_0047;msp_0053;msp_0054;msp_0055;msp_0061;msp_0063;msp_0064;msp_0066;msp_0067;msp_0068;msp_0069;msp_0070;msp…	Blastocystis sp. subtype 3;Blastocystis sp. subtype 1;Bacteroides cellulosilyticus;Blastocystis sp. subtype 4;Bacteroides ovatus;Bacteroides intestinalis;[Clostridium] bolteae;Bacteroides fragilis 1;Bacteroides thetaiotaomicron;Parabacteroides distasonis;Eisenbergiella tayi;Bacteroides plebeius;Roseburia intestinalis;Eisenbergiella massiliensis;Bacteroides faecis;Bacteroides xylanisolvens;Bactero…	-	-	-	Glyco_hydro_35;Glyco_hydro_42	-	cazy.GH35	-	-	-	-	Glyco_hydro_35;Glyco_hydro_42;cazy.GH35
CL-126	11	305	Yes	No	msp_0003;msp_0007;msp_0008;msp_0011;msp_0012;msp_0014;msp_0016;msp_0018;msp_0019;msp_0021;msp_0022;msp_0023;msp_0024;msp_0027;msp_0028;msp_0032;msp_0034;msp_0035;msp_0036;msp_0037;msp_0043;msp_0044;msp_0054;msp_0061;msp_0063;msp_0067;msp_0069;msp_0074;msp_0078;msp_0083;msp_0084;msp_0089;msp_0091;msp_0096;msp_0098;msp_0102;msp_0105;msp_0118;msp_0122;msp_0132;msp_0136;msp_0137;msp_0143;msp_0149;msp…	Bacteroides cellulosilyticus;Bacteroides ovatus;Bacteroides intestinalis;Bacteroides thetaiotaomicron;Parabacteroides distasonis;Eisenbergiella tayi;Bacteroides plebeius;Eisenbergiella massiliensis;Bacteroides faecis;Bacteroides xylanisolvens;Bacteroides finegoldii;Bacteroides caccae;Hungatella effluvii;Parabacteroides merdae;Parabacteroides goldsteinii;Alistipes onderdonkii;[Faecalibacterium] sp…	-	-	K00848;K01813;K05989;K01629	Glyco_hydro_106;Bac_rhamnosid;Bac_rhamnosid_C;Bac_rhamnosid_N;Bac_rhamnosid6H;RhaA	-	cazy.GH78	-	-	-	-	Glyco_hydro_106;K00848;K01813;K05989;Bac_rhamnosid;Bac_rhamnosid_C;Bac_rhamnosid_N;Bac_rhamnosid6H;RhaA;cazy.GH78;K01629
CL-275	4	305	Yes	No	msp_0009;msp_0014;msp_0015;msp_0017;msp_0018;msp_0020;msp_0024;msp_0029;msp_0039;msp_0042;msp_0044;msp_0048;msp_0049;msp_0050;msp_0052;msp_0055;msp_0056;msp_0057;msp_0058;msp_0060;msp_0065;msp_0066;msp_0068;msp_0071;msp_0072;msp_0074;msp_0075;msp_0076;msp_0077;msp_0079;msp_0085;msp_0086;msp_0087;msp_0093;msp_0094;msp_0107;msp_0109;msp_0111;msp_0112;msp_0113;msp_0115c;msp_0125;msp_0126;msp_0129;ms…	[Clostridium] bolteae;Eisenbergiella tayi;Roseburia faecis;Roseburia intestinalis;Eisenbergiella massiliensis;[Clostridium] clostridioforme 1;Hungatella effluvii;[Eubacterium] eligens;Lachnospiraceae bacterium hRUG904 / Clostridiales bacterium RUG495 / [Clostridium] sp. CAG:127;Coprococcus eutactus 2;Hungatella hathewayi 1;[Eubacterium] sp. CAG:38;unclassified Lachnoclostridium;Anaerobutyricum ha…	M00656:VanS-VanR (VanB type vancomycin resistance) two-component regulatory system ;M00651:Vancomycin resistance, D-Ala-D-Lac type	Two-component regulatory system;Drug resistance	K16511;K18345	DUF4446;MecA	-	-	-	-	-	-	DUF4446;K16511;K18345;MecA
CL-660	3	301	Yes	No	msp_0003;msp_0005;msp_0007;msp_0008;msp_0010;msp_0011;msp_0012;msp_0016;msp_0019;msp_0021;msp_0022;msp_0023;msp_0027;msp_0028;msp_0030;msp_0031;msp_0032;msp_0033;msp_0034;msp_0035;msp_0036;msp_0037;msp_0038;msp_0040;msp_0041;msp_0046;msp_0051;msp_0052;msp_0054;msp_0059;msp_0061;msp_0063;msp_0064;msp_0069;msp_0077;msp_0082c;msp_0084;msp_0089;msp_0091;msp_0092;msp_0098;msp_0100;msp_0102;msp_0106;ms…	Bacteroides cellulosilyticus;Escherichia coli;Bacteroides ovatus;Bacteroides intestinalis;Bacteroides fragilis 1;Bacteroides thetaiotaomicron;Parabacteroides distasonis;Bacteroides plebeius;Bacteroides faecis;Bacteroides xylanisolvens;Bacteroides finegoldii;Bacteroides caccae;Parabacteroides merdae;Parabacteroides goldsteinii;Klebsiella pneumoniae;Bacteroides stercoris;Alistipes onderdonkii;Bacte…	-	-	-	PQQ_2;PQQ_3;PQQ	-	-	-	-	-	-	PQQ_2;PQQ_3;PQQ
CL-332	6	298	Yes	No	msp_0009;msp_0014;msp_0015;msp_0017;msp_0018;msp_0020;msp_0039;msp_0042;msp_0050;msp_0056;msp_0057;msp_0060;msp_0068;msp_0071;msp_0072;msp_0074;msp_0075;msp_0085;msp_0086;msp_0088;msp_0093;msp_0103;msp_0104;msp_0107;msp_0110;msp_0117;msp_0121;msp_0124;msp_0125;msp_0129;msp_0133;msp_0135;msp_0151;msp_0160;msp_0168;msp_0173;msp_0175;msp_0179;msp_0180;msp_0185;msp_0186;msp_0192;msp_0194;msp_0197;msp…	[Clostridium] bolteae;Eisenbergiella tayi;Roseburia faecis;Roseburia intestinalis;Eisenbergiella massiliensis;[Clostridium] clostridioforme 1;Lachnospiraceae bacterium hRUG904 / Clostridiales bacterium RUG495 / [Clostridium] sp. CAG:127;Coprococcus eutactus 2;Anaerobutyricum hallii;unclassified Lachnoclostridium;Roseburia sp. CAG:45 & sp. 2789STDY5608886;Lachnospiraceae bacterium CIM:MAG 844 / Fi…	M00375:Hydroxypropionate-hydroxybutylate cycle ;M00374:Dicarboxylate-hydroxybutyrate cycle ;M00373:Ethylmalonyl pathway ;M00088:Ketone body biosynthesis, acetyl-CoA => acetoacetate/3-hydroxybutyrate/acetone ;M00095:C5 isoprenoid biosynthesis, mevalonate pathway ;M00849:C5 isoprenoid biosynthesis, mevalonate pathway, archaea	Carbon fixation;Other carbohydrate metabolism;Fatty acid metabolism;Terpenoid backbone biosynthesis	K00626;K01715;K00248;K00074	3HCDH;Thiolase_C	-	-	-	-	-	-	K00626;K01715;K00248;3HCDH;Thiolase_C;K00074
CL-277	3	297	Yes	No	msp_0009;msp_0013;msp_0015;msp_0020;msp_0025;msp_0029;msp_0038;msp_0039;msp_0042;msp_0047;msp_0049;msp_0050;msp_0053;msp_0055;msp_0056;msp_0057;msp_0060;msp_0068;msp_0070;msp_0075;msp_0077;msp_0079;msp_0086;msp_0093;msp_0099;msp_0103;msp_0104;msp_0109;msp_0110;msp_0113;msp_0116;msp_0119;msp_0120;msp_0127;msp_0130;msp_0131;msp_0132;msp_0138;msp_0142;msp_0146c;msp_0153;msp_0158;msp_0159;msp_0161;ms…	[Clostridium] bolteae;Ruminococcus bicirculans;Roseburia faecis;[Clostridium] clostridioforme 1;Akkermansia muciniphila;[Eubacterium] eligens;unclassified Lentisphaeria;Lachnospiraceae bacterium hRUG904 / Clostridiales bacterium RUG495 / [Clostridium] sp. CAG:127;Coprococcus eutactus 2;[Eubacterium] sp. CAG:115;unclassified Lachnoclostridium;Anaerobutyricum hallii;[Eubacterium] siraeum;Firmicutes…	-	-	K02652	DiS_P_DiS;N_methyl	-	-	-	-	-	-	K02652;DiS_P_DiS;N_methyl
CL-614	3	296	Yes	No	msp_0009;msp_0013;msp_0015;msp_0017;msp_0018;msp_0020;msp_0024;msp_0042;msp_0044;msp_0045;msp_0047;msp_0053;msp_0056;msp_0057;msp_0058;msp_0066;msp_0071;msp_0072;msp_0085;msp_0093;msp_0094;msp_0095;msp_0105;msp_0106;msp_0107;msp_0115c;msp_0124;msp_0126;msp_0127;msp_0132;msp_0133;msp_0147;msp_0150c;msp_0163;msp_0165;msp_0169;msp_0171;msp_0175;msp_0178;msp_0180;msp_0182;msp_0194;msp_0200;msp_0203;m…	[Clostridium] bolteae;Ruminococcus bicirculans;Roseburia faecis;Roseburia intestinalis;Eisenbergiella massiliensis;[Clostridium] clostridioforme 1;Hungatella effluvii;Coprococcus eutactus 2;Hungatella hathewayi 1;Ruminococcus bromii 2;[Eubacterium] sp. CAG:115;[Eubacterium] siraeum;unclassified Lachnoclostridium;Roseburia sp. CAG:45 & sp. 2789STDY5608886;[Ruminococcus] gnavus;[Clostridium] sp. AT…	-	-	K06411;K06410	DpaA_N	-	-	-	-	-	-	K06411;DpaA_N;K06410
CL-591	3	294	Yes	No	msp_0005;msp_0012;msp_0014;msp_0017;msp_0018;msp_0025;msp_0027;msp_0028;msp_0029;msp_0030;msp_0038;msp_0057;msp_0058;msp_0059;msp_0070;msp_0071;msp_0072;msp_0077;msp_0082c;msp_0083;msp_0085;msp_0087;msp_0092;msp_0094;msp_0098;msp_0100;msp_0104;msp_0105;msp_0106;msp_0108;msp_0109;msp_0110;msp_0112;msp_0121;msp_0124;msp_0134;msp_0139;msp_0140;msp_0142;msp_0145;msp_0147;msp_0148c;msp_0152;msp_0156;m…	Escherichia coli;Parabacteroides distasonis;Eisenbergiella tayi;Roseburia intestinalis;Eisenbergiella massiliensis;Akkermansia muciniphila;Parabacteroides merdae;Parabacteroides goldsteinii;[Eubacterium] eligens;Klebsiella pneumoniae;unclassified Lentisphaeria;Roseburia sp. CAG:45 & sp. 2789STDY5608886;[Ruminococcus] gnavus;Barnesiella intestinihominis;Akkermansia muciniphila 2;Roseburia hominis;…	-	-	K04652;K04651	HypA	-	-	-	-	-	-	K04652;HypA;K04651
CL-308	3	290	Yes	No	msp_0003;msp_0007;msp_0008;msp_0010;msp_0011;msp_0012;msp_0013;msp_0015;msp_0016;msp_0018;msp_0019;msp_0021;msp_0022;msp_0023;msp_0024;msp_0025;msp_0026;msp_0027;msp_0028;msp_0029;msp_0031;msp_0032;msp_0033;msp_0034;msp_0035;msp_0036;msp_0037;msp_0038;msp_0039;msp_0040;msp_0041;msp_0042;msp_0043;msp_0044;msp_0045;msp_0046;msp_0047;msp_0048;msp_0049;msp_0050;msp_0054;msp_0055;msp_0060;msp_0061;msp…	Bacteroides cellulosilyticus;Bacteroides ovatus;Bacteroides intestinalis;Bacteroides fragilis 1;Bacteroides thetaiotaomicron;Parabacteroides distasonis;Ruminococcus bicirculans;Roseburia faecis;Bacteroides plebeius;Eisenbergiella massiliensis;Bacteroides faecis;Bacteroides xylanisolvens;Bacteroides finegoldii;Bacteroides caccae;Hungatella effluvii;Akkermansia muciniphila;Paraprevotella clara;Para…	-	-	K00441	FrhB_FdhB_C;FrhB_FdhB_N	-	-	-	-	-	-	FrhB_FdhB_C;FrhB_FdhB_N;K00441
CL-576	3	287	Yes	No	msp_0003;msp_0008;msp_0009;msp_0010;msp_0013;msp_0014;msp_0015;msp_0016;msp_0018;msp_0019;msp_0020;msp_0023;msp_0027;msp_0028;msp_0029;msp_0031;msp_0033;msp_0034;msp_0040;msp_0041;msp_0043;msp_0047;msp_0050;msp_0054;msp_0056;msp_0058;msp_0062;msp_0064;msp_0065;msp_0067;msp_0071;msp_0072;msp_0079;msp_0080;msp_0083;msp_0084;msp_0087;msp_0089;msp_0096;msp_0101;msp_0103;msp_0105;msp_0106;msp_0111;msp…	Bacteroides cellulosilyticus;Bacteroides intestinalis;[Clostridium] bolteae;Bacteroides fragilis 1;Ruminococcus bicirculans;Eisenbergiella tayi;Roseburia faecis;Bacteroides plebeius;Eisenbergiella massiliensis;Bacteroides faecis;[Clostridium] clostridioforme 1;Bacteroides caccae;Parabacteroides merdae;Parabacteroides goldsteinii;[Eubacterium] eligens;Bacteroides stercoris;Bacteroides fragilis 2;[…	M00223:Phosphonate transport system	Phosphate and amino acid transport system	K07487	DDE_Tnp_1_6;DUF772	-	-	-	-	-	-	DDE_Tnp_1_6;DUF772;K07487
CL-599	3	285	Yes	No	msp_0009;msp_0020;msp_0024;msp_0025;msp_0029;msp_0034;msp_0038;msp_0044;msp_0045;msp_0048;msp_0049;msp_0056;msp_0066;msp_0070;msp_0073;msp_0077;msp_0079;msp_0086;msp_0095;msp_0105;msp_0115c;msp_0116;msp_0119;msp_0120;msp_0129;msp_0134;msp_0135;msp_0148c;msp_0159;msp_0177;msp_0186;msp_0197;msp_0201;msp_0206;msp_0215;msp_0218;msp_0222;msp_0227;msp_0233;msp_0245;msp_0248;msp_0249;msp_0254;msp_0255;m…	[Clostridium] bolteae;[Clostridium] clostridioforme 1;Hungatella effluvii;Akkermansia muciniphila;[Eubacterium] eligens;[Faecalibacterium] sp. CAG:74;unclassified Lentisphaeria;Hungatella hathewayi 1;Ruminococcus bromii 2;[Eubacterium] sp. CAG:38;unclassified Lachnoclostridium;unclassified Lachnoclostridium;[Clostridium] sp. AT4;Akkermansia muciniphila 2;Victivallales bacterium CCUG 44730;unclass…	M00348:Glutathione transport system	Peptide and nickel transport system	K19411;K19405	ATP-gua_Ptrans	-	-	-	-	-	-	K19411;ATP-gua_Ptrans;K19405
CL-271	12	284	Yes	No	msp_0009;msp_0020;msp_0024;msp_0044;msp_0049;msp_0052;msp_0056;msp_0058;msp_0076;msp_0079;msp_0111;msp_0126;msp_0134;msp_0152;msp_0154;msp_0163;msp_0169;msp_0180;msp_0189;msp_0200;msp_0204;msp_0233;msp_0242;msp_0244;msp_0265;msp_0266;msp_0268;msp_0272;msp_0299;msp_0329;msp_0338;msp_0388;msp_0422;msp_0436;msp_0440;msp_0464;msp_0489;msp_0506;msp_0510;msp_0558;msp_0580;msp_0591;msp_0615;msp_0639;msp…	[Clostridium] bolteae;[Clostridium] clostridioforme 1;Hungatella effluvii;Hungatella hathewayi 1;unclassified Lachnoclostridium;Blautia sp. CAG:257;unclassified Lachnoclostridium;[Ruminococcus] gnavus;Blautia wexlerae;[Clostridium] sp. CAG:7;Faecalimonas umbilicata;[Ruminococcus] torques;Megamonas funiformis == rupellensis;[Ruminococcus] faecis;Fusicatenibacter saccharivorans;Firmicutes bacterium…	-	-	K07141;K03518;K12528;K03519;K03458	Ald_Xan_dh_C;Ald_Xan_dh_C2;FAD_binding_5;Fer2_2;XdhC_C;XdhC_CoxI;CO_deh_flav_C	-	-	-	-	-	-	K07141;K03518;Ald_Xan_dh_C;Ald_Xan_dh_C2;FAD_binding_5;Fer2_2;XdhC_C;XdhC_CoxI;CO_deh_flav_C;K12528;K03519;K03458
CL-627	3	283	Yes	No	msp_0014;msp_0015;msp_0017;msp_0018;msp_0024;msp_0029;msp_0034;msp_0044;msp_0048;msp_0052;msp_0055;msp_0058;msp_0060;msp_0065;msp_0066;msp_0068;msp_0071;msp_0072;msp_0074;msp_0075;msp_0076;msp_0077;msp_0079;msp_0085;msp_0086;msp_0087;msp_0094;msp_0111;msp_0113;msp_0115c;msp_0124;msp_0125;msp_0127;msp_0141;msp_0142;msp_0152;msp_0154;msp_0158;msp_0161;msp_0162;msp_0163;msp_0168;msp_0171;msp_0172;ms…	Eisenbergiella tayi;Roseburia faecis;Roseburia intestinalis;Eisenbergiella massiliensis;Hungatella effluvii;[Eubacterium] eligens;[Faecalibacterium] sp. CAG:74;Hungatella hathewayi 1;[Eubacterium] sp. CAG:38;Blautia sp. CAG:257;Firmicutes bacterium CAG:65 / [Clostridium] sp. 2789STDY5608883;[Ruminococcus] gnavus;Lachnospiraceae bacterium CIM:MAG 844 / Firmicutes bacterium CAG:95;[Ruminococcus] sp…	-	-	K17319;K17320;K17318	-	-	-	-	-	-	-	K17319;K17320;K17318
CL-441	7	282	Yes	No	msp_0005;msp_0009;msp_0017;msp_0020;msp_0029;msp_0044;msp_0049;msp_0056;msp_0066;msp_0072;msp_0079;msp_0086;msp_0094;msp_0104;msp_0106;msp_0107;msp_0109;msp_0110;msp_0113;msp_0121;msp_0129;msp_0134;msp_0135;msp_0145;msp_0161;msp_0163;msp_0171;msp_0180;msp_0182;msp_0186;msp_0195;msp_0204;msp_0208;msp_0221;msp_0233;msp_0240;msp_0242;msp_0254;msp_0258;msp_0265;msp_0266;msp_0279;msp_0289;msp_0295;msp…	Escherichia coli;[Clostridium] bolteae;Roseburia intestinalis;[Clostridium] clostridioforme 1;[Eubacterium] eligens;Hungatella hathewayi 1;unclassified Lachnoclostridium;unclassified Lachnoclostridium;[Clostridium] sp. AT4;Roseburia inulinivorans;[Clostridium] sp. CAG:7;[Clostridium] symbiosum;unclassified Roseburia;Emergencia timonensis;Clostridiales bacterium UBA7273 / Firmicutes bacterium CAG:…	-	-	K11690;K21395;K11689;K21393	DctP;DctQ;DctM	-	-	-	-	-	-	K11690;K21395;DctP;DctQ;K11689;DctM;K21393
CL-416	9	280	Yes	No	msp_0005;msp_0024;msp_0029;msp_0030;msp_0065;msp_0076;msp_0082c;msp_0092;msp_0093;msp_0100;msp_0103;msp_0108;msp_0110;msp_0119;msp_0131;msp_0134;msp_0140;msp_0141;msp_0142;msp_0145;msp_0146c;msp_0148c;msp_0153;msp_0157;msp_0162;msp_0165;msp_0174;msp_0189;msp_0197;msp_0200;msp_0202;msp_0209;msp_0212;msp_0215;msp_0226;msp_0228;msp_0239;msp_0245;msp_0253;msp_0272;msp_0278;msp_0280;msp_0288;msp_0295;…	Escherichia coli;Hungatella effluvii;[Eubacterium] eligens;Klebsiella pneumoniae;[Ruminococcus] sp. CAG:17 / Blautia sp. 2789STDY5608880;Blautia wexlerae;Providencia rettgeri 2;Sutterella wadsworthensis 1;[Clostridium] sp. CAG:62;Morganella morganii;[Clostridium] innocuum;Enterobacter hormaechei;Bilophila wadsworthia;unclassified Acidaminococcaceae;Phascolarctobacterium faecium;Megamonas funiform…	M00121:Heme biosynthesis, glutamate => heme ;M00846:Siroheme biosynthesis, glutamate => siroheme	Cofactor and vitamin biosynthesis	K01698;K02492;K01845;K01749	ALAD;GlutR_N;Porphobil_deam;GlutR_dimer;Porphobil_deamC	-	-	-	-	-	-	K01698;K02492;ALAD;GlutR_N;Porphobil_deam;K01845;K01749;GlutR_dimer;Porphobil_deamC
CL-273	3	270	Yes	No	msp_0013;msp_0053;msp_0115c;msp_0119;msp_0144;msp_0147;msp_0173;msp_0203;msp_0204;msp_0213;msp_0222;msp_0234;msp_0252;msp_0258;msp_0271;msp_0276;msp_0277;msp_0285;msp_0291;msp_0302;msp_0303;msp_0311;msp_0319;msp_0323;msp_0340;msp_0342;msp_0353;msp_0357;msp_0362;msp_0364;msp_0370;msp_0372;msp_0398;msp_0400;msp_0401;msp_0410;msp_0421;msp_0430;msp_0434;msp_0442;msp_0449;msp_0452;msp_0454;msp_0462;ms…	Ruminococcus bicirculans;[Eubacterium] siraeum;Lachnoclostridium phytofermentans 2;unclassified Acidaminococcaceae;[Clostridium] sp. CAG:138;unclassified Ruminococcaceae;Christensenellaceae bacterium Phil1 & [Clostridium] sp. CAG:226;Negativibacillus massiliensis;Clostridia bacterium UC5.1-1D10 / [Clostridium] sp. CAG:505 / Firmicutes bacterium CAG:466;Flavonifractor plautii;[Clostridium] sp. CAG…	-	-	K06297	Spore_GerAC;Spore_permease	-	-	-	-	-	-	K06297;Spore_GerAC;Spore_permease
CL-594	5	269	Yes	No	msp_0005;msp_0030;msp_0082c;msp_0100;msp_0110;msp_0119;msp_0131;msp_0134;msp_0140;msp_0145;msp_0146c;msp_0148c;msp_0157;msp_0167c;msp_0195;msp_0197;msp_0202;msp_0212;msp_0215;msp_0221;msp_0226;msp_0228;msp_0239;msp_0253;msp_0279;msp_0280;msp_0288;msp_0295;msp_0313;msp_0328;msp_0333;msp_0341;msp_0359;msp_0366;msp_0368c;msp_0369;msp_0380;msp_0383;msp_0386;msp_0403;msp_0406;msp_0408;msp_0413;msp_041…	Escherichia coli;Klebsiella pneumoniae;Providencia rettgeri 2;Morganella morganii;Bilophila wadsworthia;unclassified Acidaminococcaceae;Phascolarctobacterium faecium;Megamonas funiformis == rupellensis;Klebsiella oxytoca;Parasutterella excrementihominis;Streptococcus sanguinis;Veillonella infantium;Klebsiella aerogenes;Plesiomonas shigelloides;Desulfovibrio piger;Megasphaera sp. BL7 & NM10;[Acine…	M00764:PTS system, fructoselysine and glucoselysine-specific II component	Phosphotransferase system (PTS)	K01879;K06149;K01878	tRNA-synt_2e;tRNA_synt_2f	-	-	-	-	-	-	K01879;K06149;tRNA-synt_2e;tRNA_synt_2f;K01878
CL-626	3	269	Yes	No	msp_0013;msp_0014;msp_0015;msp_0017;msp_0018;msp_0029;msp_0039;msp_0041;msp_0042;msp_0047;msp_0048;msp_0050;msp_0053;msp_0058;msp_0062;msp_0065;msp_0068;msp_0074;msp_0077;msp_0078;msp_0079;msp_0081;msp_0084;msp_0085;msp_0087;msp_0088;msp_0091;msp_0095;msp_0107;msp_0110;msp_0117;msp_0119;msp_0123;msp_0127;msp_0131;msp_0133;msp_0134;msp_0136;msp_0138;msp_0142;msp_0150c;msp_0151;msp_0152;msp_0158;ms…	Ruminococcus bicirculans;Eisenbergiella tayi;Roseburia faecis;Roseburia intestinalis;Eisenbergiella massiliensis;[Eubacterium] eligens;Lachnospiraceae bacterium hRUG904 / Clostridiales bacterium RUG495 / [Clostridium] sp. CAG:127;Prevotella copri 1;Coprococcus eutactus 2;[Eubacterium] sp. CAG:115;[Eubacterium] sp. CAG:38;Anaerobutyricum hallii;[Eubacterium] siraeum;[Ruminococcus] gnavus;Odoribact…	M00323:Urea transport system	Phosphate and amino acid transport system	K08681;K06215	SOR_SNZ	-	-	-	-	-	-	K08681;SOR_SNZ;K06215
CL-575	3	266	Yes	No	msp_0003;msp_0007;msp_0008;msp_0009;msp_0010;msp_0011;msp_0012;msp_0014;msp_0018;msp_0019;msp_0020;msp_0021;msp_0022;msp_0023;msp_0024;msp_0025;msp_0027;msp_0028;msp_0031;msp_0032;msp_0033;msp_0037;msp_0038;msp_0040;msp_0044;msp_0054;msp_0056;msp_0061;msp_0062;msp_0063;msp_0070;msp_0085;msp_0086;msp_0088;msp_0089;msp_0090;msp_0098;msp_0102;msp_0103;msp_0104;msp_0108;msp_0110;msp_0112;msp_0118;msp…	Bacteroides cellulosilyticus;Bacteroides ovatus;Bacteroides intestinalis;[Clostridium] bolteae;Bacteroides fragilis 1;Bacteroides thetaiotaomicron;Parabacteroides distasonis;Eisenbergiella tayi;Eisenbergiella massiliensis;Bacteroides faecis;[Clostridium] clostridioforme 1;Bacteroides xylanisolvens;Bacteroides finegoldii;Bacteroides caccae;Hungatella effluvii;Akkermansia muciniphila;Parabacteroide…	M00360:Aminoacyl-tRNA biosynthesis, prokaryotes	Aminoacyl tRNA	K12267	PMSR;SelR	-	-	-	-	-	-	PMSR;SelR;K12267
CL-611	3	266	Yes	No	msp_0009;msp_0014;msp_0018;msp_0020;msp_0041;msp_0044;msp_0049;msp_0067;msp_0073;msp_0078;msp_0081;msp_0084;msp_0085;msp_0087;msp_0091;msp_0103;msp_0110;msp_0115c;msp_0119;msp_0120;msp_0123;msp_0130;msp_0131;msp_0132;msp_0134;msp_0150c;msp_0153;msp_0159;msp_0172;msp_0173;msp_0176;msp_0186;msp_0188;msp_0190;msp_0195;msp_0207;msp_0213;msp_0215;msp_0221;msp_0224;msp_0226;msp_0231;msp_0233;msp_0234;m…	[Clostridium] bolteae;Eisenbergiella tayi;Eisenbergiella massiliensis;[Clostridium] clostridioforme 1;Prevotella copri 1;Hungatella hathewayi 1;unclassified Lachnoclostridium;Prevotella sp. 109 & CAG:255;Victivallales bacterium CCUG 44730;Prevotella sp. CAG:732;unclassified Prevotella;Prevotella sp. RUG457 & sp. RUG782 & sp. CAG:386;unclassified Eisenbergiella;Lachnospira pectinoschiza;Prevotella…	-	-	K05919	Desulfoferrod_N;Desulfoferrodox	-	-	-	-	-	-	Desulfoferrod_N;Desulfoferrodox;K05919
CL-113	6	265	Yes	No	msp_0003;msp_0007;msp_0008;msp_0009;msp_0010;msp_0011;msp_0014;msp_0016;msp_0017;msp_0018;msp_0019;msp_0021;msp_0022;msp_0023;msp_0024;msp_0026;msp_0027;msp_0028;msp_0029;msp_0031;msp_0034;msp_0036;msp_0037;msp_0040;msp_0041;msp_0043;msp_0044;msp_0046;msp_0048;msp_0049;msp_0054;msp_0056;msp_0058;msp_0061;msp_0063;msp_0066;msp_0067;msp_0069;msp_0071;msp_0072;msp_0074;msp_0075;msp_0077;msp_0078;msp…	Bacteroides cellulosilyticus;Bacteroides ovatus;Bacteroides intestinalis;[Clostridium] bolteae;Bacteroides fragilis 1;Bacteroides thetaiotaomicron;Eisenbergiella tayi;Bacteroides plebeius;Roseburia intestinalis;Eisenbergiella massiliensis;Bacteroides faecis;Bacteroides xylanisolvens;Bacteroides finegoldii;Bacteroides caccae;Hungatella effluvii;Paraprevotella clara;Parabacteroides merdae;Parabacte…	-	-	K01815;K15532;K00046	Glyco_hydro_88;KduI	-	cazy.GH105	-	-	-	-	K01815;K15532;Glyco_hydro_88;KduI;cazy.GH105;K00046
CL-303	3	263	Yes	No	msp_0003;msp_0005;msp_0007;msp_0008;msp_0010;msp_0011;msp_0012;msp_0016;msp_0018;msp_0019;msp_0020;msp_0021;msp_0022;msp_0023;msp_0024;msp_0025;msp_0027;msp_0028;msp_0031;msp_0032;msp_0033;msp_0035;msp_0037;msp_0038;msp_0040;msp_0043;msp_0044;msp_0046;msp_0054;msp_0058;msp_0059;msp_0061;msp_0063;msp_0064;msp_0067;msp_0069;msp_0070;msp_0073;msp_0080;msp_0081;msp_0083;msp_0089;msp_0096;msp_0098;msp…	Bacteroides cellulosilyticus;Escherichia coli;Bacteroides ovatus;Bacteroides intestinalis;Bacteroides fragilis 1;Bacteroides thetaiotaomicron;Parabacteroides distasonis;Bacteroides plebeius;Eisenbergiella massiliensis;Bacteroides faecis;[Clostridium] clostridioforme 1;Bacteroides xylanisolvens;Bacteroides finegoldii;Bacteroides caccae;Hungatella effluvii;Akkermansia muciniphila;Parabacteroides me…	-	-	-	BNR;BNR_2	-	cazy.GH33	-	-	-	-	BNR;BNR_2;cazy.GH33
CL-18	10	262	Yes	No	msp_0009;msp_0015;msp_0020;msp_0024;msp_0044;msp_0049;msp_0050;msp_0056;msp_0065;msp_0066;msp_0068;msp_0079;msp_0086;msp_0111;msp_0126;msp_0142;msp_0154;msp_0160;msp_0164;msp_0169;msp_0175;msp_0186;msp_0226;msp_0242;msp_0246;msp_0254;msp_0265;msp_0268;msp_0276;msp_0299;msp_0301;msp_0307;msp_0309;msp_0331;msp_0337;msp_0345;msp_0346;msp_0361;msp_0362;msp_0366;msp_0369;msp_0388;msp_0389;msp_0391;msp…	[Clostridium] bolteae;Roseburia faecis;[Clostridium] clostridioforme 1;Hungatella effluvii;Hungatella hathewayi 1;unclassified Lachnoclostridium;Anaerobutyricum hallii;unclassified Lachnoclostridium;[Ruminococcus] sp. CAG:17 / Blautia sp. 2789STDY5608880;[Clostridium] sp. AT4;[Eubacterium] rectale;[Clostridium] sp. CAG:7;[Clostridium] symbiosum;Faecalimonas umbilicata;[Ruminococcus] torques;Blaut…	M00189:Molybdate transport system	Mineral and organic ion transport system	K02018;K02020;K03637;K07402;K11261;K01008;K02017	MoaC;Mob_synth_C	Rv3111	-	-	-	-	Cyclic pyranopterin monophosphate synthase (EC 4.6.1.17)	K02018;K02020;K03637;MoaC;Mob_synth_C;K07402;K11261;Rv3111;K01008;K02017
CL-615	3	262	Yes	No	msp_0009;msp_0012;msp_0020;msp_0024;msp_0027;msp_0028;msp_0044;msp_0053;msp_0056;msp_0062;msp_0066;msp_0083;msp_0086;msp_0088;msp_0098;msp_0104;msp_0105;msp_0109;msp_0112;msp_0115c;msp_0117;msp_0126;msp_0128;msp_0147;msp_0150c;msp_0155;msp_0156;msp_0172;msp_0173;msp_0177;msp_0184;msp_0191;msp_0193;msp_0210;msp_0216;msp_0222;msp_0230;msp_0246;msp_0249;msp_0252;msp_0254;msp_0271;msp_0286;msp_0291;m…	[Clostridium] bolteae;Parabacteroides distasonis;[Clostridium] clostridioforme 1;Hungatella effluvii;Parabacteroides merdae;Parabacteroides goldsteinii;Hungatella hathewayi 1;[Eubacterium] siraeum;unclassified Lachnoclostridium;Odoribacter splanchnicus;[Clostridium] sp. AT4;Parabacteroides johnsonii;[Clostridium] symbiosum;Butyricimonas sp. Marseille-P3923;Parabacteroides gordonii;Emergencia timo…	-	-	K18330;K18331;K18332	-	-	-	-	-	-	-	K18330;K18331;K18332
CL-526	4	260	Yes	No	msp_0025;msp_0038;msp_0053;msp_0070;msp_0073;msp_0099;msp_0106;msp_0116;msp_0120;msp_0127;msp_0147;msp_0150c;msp_0159;msp_0201;msp_0213;msp_0249;msp_0252;msp_0255;msp_0262;msp_0276;msp_0277;msp_0285;msp_0290;msp_0291;msp_0297;msp_0315;msp_0340;msp_0343;msp_0370;msp_0372;msp_0393;msp_0395;msp_0400;msp_0401;msp_0410;msp_0411;msp_0421;msp_0425;msp_0432;msp_0434;msp_0437c;msp_0442;msp_0444;msp_0445;m…	Akkermansia muciniphila;unclassified Lentisphaeria;[Eubacterium] siraeum;Akkermansia muciniphila 2;Victivallales bacterium CCUG 44730;Lentisphaeria bacterium UBA1829;Clostridiales bacterium UBA7273 / Firmicutes bacterium CAG:240;unclassified Lentisphaeria;unclassified Victivallales;Ruminococcus sp. CAG:353 & sp. 2789STDY5834938;unclassified Ruminococcaceae;[Clostridium] methylpentosum;Victivallis…	-	-	K01596	PEPCK_GTP;PEPCK_N	BCG_0248	-	-	-	-	Phosphoenolpyruvate carboxykinase [GTP] (EC 4.1.1.32)	K01596;PEPCK_GTP;PEPCK_N;BCG_0248
CL-592	3	256	Yes	No	msp_0005;msp_0014;msp_0018;msp_0024;msp_0030;msp_0042;msp_0044;msp_0062;msp_0065;msp_0067;msp_0085;msp_0086;msp_0088;msp_0102;msp_0103;msp_0104;msp_0108;msp_0109;msp_0112;msp_0115c;msp_0119;msp_0126;msp_0131;msp_0132;msp_0134;msp_0140;msp_0146c;msp_0149;msp_0150c;msp_0151;msp_0153;msp_0157;msp_0174;msp_0177;msp_0184;msp_0186;msp_0188;msp_0191;msp_0193;msp_0200;msp_0209;msp_0212;msp_0213;msp_0221;…	Escherichia coli;Eisenbergiella tayi;Eisenbergiella massiliensis;Hungatella effluvii;Klebsiella pneumoniae;Coprococcus eutactus 2;Hungatella hathewayi 1;Odoribacter splanchnicus;[Ruminococcus] sp. CAG:17 / Blautia sp. 2789STDY5608880;Prevotella sp. 109 & CAG:255;unclassified Eisenbergiella;[Clostridium] symbiosum;Butyricimonas sp. Marseille-P3923;unclassified Bacteroides;[Clostridium] innocuum;Em…	M00333:Type IV secretion system	Bacterial secretion system	K05847;K05846	OpuAC	-	-	-	-	-	-	K05847;OpuAC;K05846
CL-566	6	255	Yes	No	msp_0003;msp_0005;msp_0007;msp_0008;msp_0009;msp_0010;msp_0011;msp_0012;msp_0014;msp_0016;msp_0018;msp_0019;msp_0023;msp_0024;msp_0025;msp_0026;msp_0027;msp_0028;msp_0030;msp_0031;msp_0032;msp_0033;msp_0036;msp_0037;msp_0038;msp_0041;msp_0043;msp_0044;msp_0046;msp_0049;msp_0052;msp_0054;msp_0056;msp_0058;msp_0059;msp_0061;msp_0062;msp_0063;msp_0066;msp_0067;msp_0069;msp_0070;msp_0073;msp_0082c;ms…	Bacteroides cellulosilyticus;Escherichia coli;Bacteroides ovatus;Bacteroides intestinalis;[Clostridium] bolteae;Bacteroides fragilis 1;Bacteroides thetaiotaomicron;Parabacteroides distasonis;Eisenbergiella tayi;Bacteroides plebeius;Eisenbergiella massiliensis;Bacteroides faecis;Bacteroides caccae;Hungatella effluvii;Akkermansia muciniphila;Paraprevotella clara;Parabacteroides merdae;Parabacteroid…	-	-	K01547;K01548;K01546	KdpA;KdpC;KdpD	-	-	-	-	-	-	K01547;K01548;KdpA;KdpC;KdpD;K01546
CL-524	4	253	Yes	No	msp_0005;msp_0009;msp_0014;msp_0015;msp_0017;msp_0018;msp_0029;msp_0030;msp_0042;msp_0048;msp_0050;msp_0055;msp_0056;msp_0057;msp_0058;msp_0060;msp_0066;msp_0068;msp_0071;msp_0072;msp_0074;msp_0075;msp_0077;msp_0079;msp_0082c;msp_0085;msp_0086;msp_0087;msp_0093;msp_0094;msp_0107;msp_0108;msp_0109;msp_0115c;msp_0119;msp_0125;msp_0126;msp_0129;msp_0130;msp_0133;msp_0134;msp_0152;msp_0157;msp_0158;m…	Escherichia coli;[Clostridium] bolteae;Eisenbergiella tayi;Roseburia faecis;Roseburia intestinalis;Eisenbergiella massiliensis;[Eubacterium] eligens;Klebsiella pneumoniae;Coprococcus eutactus 2;[Eubacterium] sp. CAG:38;Anaerobutyricum hallii;Firmicutes bacterium CAG:65 / [Clostridium] sp. 2789STDY5608883;unclassified Lachnoclostridium;Roseburia sp. CAG:45 & sp. 2789STDY5608886;[Ruminococcus] gnav…	-	-	K03610;K03608	MinC_C;MinE	-	-	-	-	-	-	K03610;MinC_C;MinE;K03608
CL-479	3	253	Yes	No	msp_0003;msp_0008;msp_0013;msp_0024;msp_0026;msp_0037;msp_0042;msp_0045;msp_0046;msp_0047;msp_0048;msp_0051;msp_0053;msp_0057;msp_0058;msp_0068;msp_0071;msp_0075;msp_0084;msp_0093;msp_0095;msp_0097;msp_0105;msp_0106;msp_0111;msp_0113;msp_0115c;msp_0124;msp_0126;msp_0127;msp_0133;msp_0134;msp_0147;msp_0150c;msp_0160;msp_0162;msp_0164;msp_0165;msp_0166;msp_0168;msp_0169;msp_0171;msp_0172;msp_0175;m…	Bacteroides cellulosilyticus;Bacteroides intestinalis;Ruminococcus bicirculans;Hungatella effluvii;Paraprevotella clara;Bacteroides salyersiae;Coprococcus eutactus 2;Ruminococcus bromii 2;Bacteroides uniformis;[Eubacterium] sp. CAG:115;[Eubacterium] sp. CAG:38;unclassified Muribaculaceae;[Eubacterium] siraeum;Roseburia sp. CAG:45 & sp. 2789STDY5608886;[Ruminococcus] gnavus;[Eubacterium] rectale;R…	-	-	-	Ricin_B_lectin;RicinB_lectin_2	-	cazy.CBM13	-	-	-	-	Ricin_B_lectin;RicinB_lectin_2;cazy.CBM13
CL-631	4	252	Yes	No	msp_0013;msp_0015;msp_0017;msp_0018;msp_0048;msp_0076;msp_0077;msp_0079;msp_0087;msp_0093;msp_0121;msp_0124;msp_0138;msp_0161;msp_0162;msp_0163;msp_0165;msp_0166;msp_0169;msp_0175;msp_0185;msp_0194;msp_0207;msp_0213;msp_0219;msp_0227;msp_0238;msp_0243;msp_0247;msp_0259;msp_0263;msp_0274;msp_0276;msp_0294;msp_0303;msp_0305;msp_0307;msp_0317;msp_0319;msp_0329;msp_0331;msp_0333;msp_0342;msp_0366;msp…	Ruminococcus bicirculans;Roseburia faecis;Roseburia intestinalis;Eisenbergiella massiliensis;[Eubacterium] sp. CAG:38;Blautia wexlerae;unclassified Lachnospiraceae;[Clostridium] sp. CAG:7;Lachnospira pectinoschiza;[Clostridium] sp. CAG:62;Oscillibacter sp. CAG:241_62_21;Candidatus Cibiobacter qucibialis;Bifidobacterium pseudocatenulatum;[Eubacterium] sp. CAG:248;unclassified Blautia;Firmicutes ba…	M00245:Cobalt/nickel transport system ;M00246:Nickel transport system	Metallic cation, iron-siderophore and vitamin B12 transport system	K01621	XFP;XFP_C;XFP_N	-	-	-	-	-	-	XFP;XFP_C;XFP_N;K01621
CL-609	4	250	Yes	No	msp_0009;msp_0024;msp_0039;msp_0042;msp_0074;msp_0093;msp_0104;msp_0107;msp_0133;msp_0175;msp_0179;msp_0192;msp_0194;msp_0207;msp_0222;msp_0223;msp_0236;msp_0238;msp_0240;msp_0243;msp_0247;msp_0266;msp_0270;msp_0289;msp_0297;msp_0302;msp_0331;msp_0338;msp_0358;msp_0364;msp_0365;msp_0366;msp_0371;msp_0378;msp_0391;msp_0406;msp_0423;msp_0440;msp_0450;msp_0459;msp_0463;msp_0464;msp_0487;msp_0499;msp…	[Clostridium] bolteae;Hungatella effluvii;Lachnospiraceae bacterium hRUG904 / Clostridiales bacterium RUG495 / [Clostridium] sp. CAG:127;Coprococcus eutactus 2;Roseburia sp. CAG:100 / Lachnospiraceae bacterium CIM:MAG 54;[Clostridium] sp. CAG:62;Emergencia timonensis;Anaerostipes hadrus 1;Coprococcus sp. 2789STDY5608819 / [Clostridium] sp. CAG:264;Lachnospiraceae bacterium TF01-11 / [Clostridium]…	M00173:Reductive citrate cycle (Arnon-Buchanan cycle) ;M00374:Dicarboxylate-hydroxybutyrate cycle ;M00620:Incomplete reductive citrate cycle, acetyl-CoA => oxoglutarate ;M00307:Pyruvate oxidation, pyruvate => acetyl-CoA	Carbon fixation;Central carbohydrate metabolism	K00170;K00171;K00172;K00169	-	-	-	-	-	-	-	K00170;K00171;K00172;K00169
CL-489	3	247	Yes	No	msp_0001;msp_0002;msp_0003;msp_0004;msp_0006;msp_0007;msp_0008;msp_0010;msp_0011;msp_0012;msp_0014;msp_0017;msp_0018;msp_0019;msp_0021;msp_0022;msp_0024;msp_0026;msp_0027;msp_0028;msp_0031;msp_0032;msp_0033;msp_0034;msp_0036;msp_0037;msp_0041;msp_0043;msp_0044;msp_0046;msp_0051;msp_0052;msp_0054;msp_0057;msp_0059;msp_0060;msp_0061;msp_0062;msp_0063;msp_0064;msp_0069;msp_0078;msp_0083;msp_0084;msp…	Blastocystis sp. subtype 3;Blastocystis sp. subtype 1;Bacteroides cellulosilyticus;Blastocystis sp. subtype 2;Blastocystis sp. subtype 4;Bacteroides ovatus;Bacteroides intestinalis;Bacteroides fragilis 1;Bacteroides thetaiotaomicron;Parabacteroides distasonis;Eisenbergiella tayi;Roseburia intestinalis;Eisenbergiella massiliensis;Bacteroides faecis;Bacteroides xylanisolvens;Bacteroides finegoldii;…	M00589:Putative lysine transport system	Phosphate and amino acid transport system	K09704	Glyco_hydro_125	-	cazy.GH125	-	-	-	-	K09704;Glyco_hydro_125;cazy.GH125
CL-324	4	245	Yes	No	msp_0005;msp_0009;msp_0014;msp_0017;msp_0018;msp_0020;msp_0024;msp_0030;msp_0044;msp_0049;msp_0052;msp_0056;msp_0057;msp_0058;msp_0071;msp_0072;msp_0074;msp_0082c;msp_0085;msp_0103;msp_0107;msp_0111;msp_0112;msp_0126;msp_0132;msp_0135;msp_0138;msp_0140;msp_0146c;msp_0152;msp_0153;msp_0157;msp_0160;msp_0166;msp_0174;msp_0177;msp_0185;msp_0186;msp_0188;msp_0200;msp_0203;msp_0209;msp_0228;msp_0231;m…	Escherichia coli;[Clostridium] bolteae;Eisenbergiella tayi;Roseburia intestinalis;Eisenbergiella massiliensis;[Clostridium] clostridioforme 1;Hungatella effluvii;Klebsiella pneumoniae;Hungatella hathewayi 1;unclassified Lachnoclostridium;Blautia sp. CAG:257;unclassified Lachnoclostridium;Roseburia sp. CAG:45 & sp. 2789STDY5608886;[Ruminococcus] gnavus;Roseburia hominis;Roseburia inulinivorans;Ros…	M00271:PTS system, beta-glucosides-specific II component	Phosphotransferase system (PTS)	K02757;K03488	PRD;CAT_RBD	-	-	-	-	-	-	K02757;PRD;K03488;CAT_RBD
CL-178	3	244	Yes	No	msp_0005;msp_0012;msp_0013;msp_0015;msp_0018;msp_0020;msp_0023;msp_0026;msp_0029;msp_0030;msp_0035;msp_0039;msp_0042;msp_0043;msp_0045;msp_0047;msp_0048;msp_0050;msp_0051;msp_0056;msp_0057;msp_0058;msp_0068;msp_0071;msp_0074;msp_0077;msp_0082c;msp_0087;msp_0093;msp_0095;msp_0097;msp_0109;msp_0112;msp_0113;msp_0115c;msp_0119;msp_0131;msp_0132;msp_0134;msp_0136;msp_0138;msp_0144;msp_0147;msp_0148c;…	Escherichia coli;Parabacteroides distasonis;Ruminococcus bicirculans;Roseburia faecis;Eisenbergiella massiliensis;[Clostridium] clostridioforme 1;Bacteroides caccae;Paraprevotella clara;[Eubacterium] eligens;Klebsiella pneumoniae;Bacteroides dorei;Lachnospiraceae bacterium hRUG904 / Clostridiales bacterium RUG495 / [Clostridium] sp. CAG:127;Coprococcus eutactus 2;Bacteroides coprocola;Ruminococcu…	-	-	K07483	HTH_Tnp_1;HTH_28	-	-	-	-	-	-	HTH_Tnp_1;K07483;HTH_28
CL-554	3	243	Yes	No	msp_0003;msp_0007;msp_0008;msp_0010;msp_0011;msp_0014;msp_0016;msp_0019;msp_0021;msp_0022;msp_0023;msp_0025;msp_0026;msp_0028;msp_0029;msp_0030;msp_0031;msp_0033;msp_0035;msp_0037;msp_0039;msp_0040;msp_0042;msp_0043;msp_0045;msp_0048;msp_0054;msp_0055;msp_0060;msp_0061;msp_0068;msp_0069;msp_0070;msp_0071;msp_0072;msp_0075;msp_0083;msp_0087;msp_0095;msp_0097;msp_0098;msp_0102;msp_0104;msp_0108;msp…	Bacteroides cellulosilyticus;Bacteroides ovatus;Bacteroides intestinalis;Bacteroides fragilis 1;Bacteroides thetaiotaomicron;Eisenbergiella tayi;Bacteroides plebeius;Bacteroides faecis;Bacteroides xylanisolvens;Bacteroides finegoldii;Bacteroides caccae;Akkermansia muciniphila;Paraprevotella clara;Parabacteroides goldsteinii;[Eubacterium] eligens;Klebsiella pneumoniae;Bacteroides stercoris;Bactero…	-	-	K10716	Ion_trans;Ion_trans_2	-	-	-	-	-	-	Ion_trans;Ion_trans_2;K10716
CL-359	3	231	Yes	No	msp_0003;msp_0007;msp_0008;msp_0009;msp_0010;msp_0011;msp_0012;msp_0013;msp_0015;msp_0016;msp_0017;msp_0019;msp_0021;msp_0022;msp_0023;msp_0028;msp_0031;msp_0032;msp_0033;msp_0034;msp_0035;msp_0037;msp_0038;msp_0040;msp_0041;msp_0042;msp_0043;msp_0044;msp_0046;msp_0047;msp_0053;msp_0054;msp_0055;msp_0057;msp_0058;msp_0059;msp_0060;msp_0061;msp_0065;msp_0069;msp_0071;msp_0072;msp_0073;msp_0074;msp…	Bacteroides cellulosilyticus;Bacteroides ovatus;Bacteroides intestinalis;[Clostridium] bolteae;Bacteroides fragilis 1;Bacteroides thetaiotaomicron;Parabacteroides distasonis;Ruminococcus bicirculans;Roseburia faecis;Bacteroides plebeius;Roseburia intestinalis;Bacteroides faecis;Bacteroides xylanisolvens;Bacteroides finegoldii;Bacteroides caccae;Parabacteroides goldsteinii;Bacteroides stercoris;Al…	-	-	K18785	Glyco_hydro_130	-	cazy.GH130	-	-	-	-	K18785;Glyco_hydro_130;cazy.GH130
CL-307	3	226	Yes	No	msp_0003;msp_0007;msp_0008;msp_0010;msp_0011;msp_0012;msp_0016;msp_0017;msp_0019;msp_0021;msp_0022;msp_0023;msp_0025;msp_0027;msp_0028;msp_0033;msp_0035;msp_0038;msp_0039;msp_0040;msp_0041;msp_0042;msp_0043;msp_0046;msp_0051;msp_0054;msp_0058;msp_0059;msp_0061;msp_0063;msp_0064;msp_0067;msp_0069;msp_0070;msp_0073;msp_0074;msp_0078;msp_0080;msp_0081;msp_0083;msp_0084;msp_0091;msp_0094;msp_0096;msp…	Bacteroides cellulosilyticus;Bacteroides ovatus;Bacteroides intestinalis;Bacteroides fragilis 1;Bacteroides thetaiotaomicron;Parabacteroides distasonis;Bacteroides plebeius;Roseburia intestinalis;Bacteroides faecis;Bacteroides xylanisolvens;Bacteroides finegoldii;Bacteroides caccae;Akkermansia muciniphila;Parabacteroides merdae;Parabacteroides goldsteinii;Bacteroides fragilis 2;Bacteroides dorei;…	-	-	K01216	Glyco_hydro_16	-	cazy.GH16	-	-	-	-	K01216;Glyco_hydro_16;cazy.GH16
CL-385	9	225	Yes	No	msp_0003;msp_0007;msp_0008;msp_0010;msp_0011;msp_0012;msp_0019;msp_0021;msp_0027;msp_0028;msp_0031;msp_0033;msp_0036;msp_0037;msp_0040;msp_0046;msp_0054;msp_0061;msp_0063;msp_0069;msp_0083;msp_0086;msp_0098;msp_0102;msp_0104;msp_0113;msp_0121;msp_0122;msp_0129;msp_0144;msp_0146c;msp_0149;msp_0163;msp_0171;msp_0173;msp_0180;msp_0182;msp_0186;msp_0203;msp_0205;msp_0211;msp_0217;msp_0221;msp_0235;ms…	Bacteroides cellulosilyticus;Bacteroides ovatus;Bacteroides intestinalis;Bacteroides fragilis 1;Bacteroides thetaiotaomicron;Parabacteroides distasonis;Bacteroides faecis;Bacteroides xylanisolvens;Parabacteroides merdae;Parabacteroides goldsteinii;Bacteroides stercoris;Bacteroides fragilis 2;Bacteroides eggerthii;Bacteroides salyersiae;Bacteroides massiliensis;Bacteroides uniformis;Bacteroides no…	M00045:Histidine degradation, histidine => N-formiminoglutamate => glutamate	Histidine metabolism	K01745;K01712;K00603	FTCD;FTCD_N;Lyase_aromatic;Urocanase;Urocanase_C;Urocanase_N	-	-	-	-	-	-	K01745;FTCD;FTCD_N;Lyase_aromatic;Urocanase;Urocanase_C;Urocanase_N;K01712;K00603
CL-496	4	224	Yes	No	msp_0003;msp_0005;msp_0007;msp_0008;msp_0010;msp_0011;msp_0012;msp_0014;msp_0016;msp_0017;msp_0019;msp_0024;msp_0025;msp_0026;msp_0031;msp_0032;msp_0035;msp_0036;msp_0037;msp_0038;msp_0041;msp_0043;msp_0044;msp_0046;msp_0054;msp_0060;msp_0067;msp_0069;msp_0070;msp_0073;msp_0089;msp_0097;msp_0098;msp_0099;msp_0102;msp_0105;msp_0116;msp_0118;msp_0120;msp_0122;msp_0123;msp_0139;msp_0140;msp_0149;msp…	Bacteroides cellulosilyticus;Escherichia coli;Bacteroides ovatus;Bacteroides intestinalis;Bacteroides fragilis 1;Bacteroides thetaiotaomicron;Parabacteroides distasonis;Eisenbergiella tayi;Bacteroides plebeius;Roseburia intestinalis;Bacteroides faecis;Hungatella effluvii;Akkermansia muciniphila;Paraprevotella clara;Bacteroides stercoris;Alistipes onderdonkii;Bacteroides dorei;Bacteroides eggerthi…	-	-	K03931	Glyco_hydro_63;Trehalase	-	cazy.GH63	-	-	-	-	K03931;Glyco_hydro_63;Trehalase;cazy.GH63
CL-363	5	218	Yes	No	msp_0005;msp_0009;msp_0020;msp_0024;msp_0044;msp_0049;msp_0056;msp_0079;msp_0086;msp_0092;msp_0108;msp_0110;msp_0119;msp_0134;msp_0135;msp_0140;msp_0145;msp_0157;msp_0174;msp_0177;msp_0186;msp_0195;msp_0202;msp_0212;msp_0213;msp_0221;msp_0226;msp_0228;msp_0233;msp_0239;msp_0240;msp_0253;msp_0254;msp_0266;msp_0279;msp_0280;msp_0288;msp_0289;msp_0295;msp_0297;msp_0298;msp_0306;msp_0317;msp_0319;msp…	Escherichia coli;[Clostridium] bolteae;[Clostridium] clostridioforme 1;Hungatella effluvii;Hungatella hathewayi 1;unclassified Lachnoclostridium;unclassified Lachnoclostridium;[Clostridium] sp. CAG:7;[Clostridium] symbiosum;Sutterella wadsworthensis 1;Enterobacter hormaechei;Bilophila wadsworthia;unclassified Acidaminococcaceae;Megamonas funiformis == rupellensis;[Clostridium] clostridioforme 2;K…	-	-	K07795;K07793	TctA;TctB;TctC	-	-	-	-	-	-	K07795;TctA;TctB;TctC;K07793
CL-144	3	216	Yes	No	msp_0003;msp_0005;msp_0007;msp_0008;msp_0010;msp_0011;msp_0012;msp_0016;msp_0019;msp_0021;msp_0022;msp_0023;msp_0026;msp_0027;msp_0028;msp_0030;msp_0031;msp_0033;msp_0034;msp_0036;msp_0037;msp_0040;msp_0041;msp_0043;msp_0046;msp_0054;msp_0061;msp_0063;msp_0069;msp_0081;msp_0082c;msp_0083;msp_0090;msp_0091;msp_0096;msp_0097;msp_0098;msp_0100;msp_0101;msp_0102;msp_0103;msp_0108;msp_0111;msp_0114;ms…	Bacteroides cellulosilyticus;Escherichia coli;Bacteroides ovatus;Bacteroides intestinalis;Bacteroides fragilis 1;Bacteroides thetaiotaomicron;Parabacteroides distasonis;Bacteroides plebeius;Bacteroides faecis;Bacteroides xylanisolvens;Bacteroides finegoldii;Bacteroides caccae;Paraprevotella clara;Parabacteroides merdae;Parabacteroides goldsteinii;Klebsiella pneumoniae;Bacteroides stercoris;Bacter…	-	-	K08968	GAF_2;GAF	-	-	-	-	-	-	GAF_2;K08968;GAF
CL-577	3	214	Yes	No	msp_0005;msp_0030;msp_0034;msp_0082c;msp_0100;msp_0104;msp_0108;msp_0110;msp_0119;msp_0134;msp_0140;msp_0144;msp_0157;msp_0167c;msp_0170;msp_0173;msp_0195;msp_0197;msp_0209;msp_0212;msp_0215;msp_0218;msp_0220;msp_0226;msp_0228;msp_0234;msp_0245;msp_0266;msp_0288;msp_0289;msp_0295;msp_0298;msp_0314;msp_0315;msp_0333;msp_0338;msp_0341;msp_0348;msp_0353;msp_0354;msp_0359;msp_0366;msp_0368c;msp_0369;…	Escherichia coli;Klebsiella pneumoniae;[Faecalibacterium] sp. CAG:74;Providencia rettgeri 2;Morganella morganii;Emergencia timonensis;Enterobacter hormaechei;Bilophila wadsworthia;unclassified Acidaminococcaceae;Megamonas funiformis == rupellensis;Klebsiella oxytoca;[Clostridium] sp. CAG:138;Klebsiella aerogenes;Plesiomonas shigelloides;Azospirillum sp. CAG:239;Christensenellaceae bacterium Phil1…	M00277:PTS system, N-acetylgalactosamine-specific II component	Phosphotransferase system (PTS)	K03667;K01419	Proteasome	-	-	-	-	-	-	K03667;Proteasome;K01419
CL-318	3	208	Yes	No	msp_0001;msp_0002;msp_0003;msp_0004;msp_0005;msp_0006;msp_0008;msp_0010;msp_0011;msp_0012;msp_0019;msp_0021;msp_0022;msp_0023;msp_0024;msp_0027;msp_0028;msp_0030;msp_0031;msp_0033;msp_0036;msp_0037;msp_0046;msp_0049;msp_0054;msp_0056;msp_0061;msp_0062;msp_0063;msp_0065;msp_0067;msp_0081;msp_0082c;msp_0083;msp_0088;msp_0092;msp_0098;msp_0100;msp_0104;msp_0108;msp_0109;msp_0110;msp_0112;msp_0117;ms…	Blastocystis sp. subtype 3;Blastocystis sp. subtype 1;Bacteroides cellulosilyticus;Blastocystis sp. subtype 2;Escherichia coli;Blastocystis sp. subtype 4;Bacteroides intestinalis;Bacteroides fragilis 1;Bacteroides thetaiotaomicron;Parabacteroides distasonis;Bacteroides faecis;Bacteroides xylanisolvens;Bacteroides finegoldii;Bacteroides caccae;Hungatella effluvii;Parabacteroides merdae;Parabactero…	-	-	K09181	CoA_binding_2;Succ_CoA_lig	-	-	-	-	-	-	CoA_binding_2;Succ_CoA_lig;K09181
CL-568	3	207	Yes	No	msp_0003;msp_0005;msp_0008;msp_0009;msp_0012;msp_0014;msp_0018;msp_0020;msp_0024;msp_0027;msp_0028;msp_0030;msp_0037;msp_0049;msp_0050;msp_0051;msp_0052;msp_0054;msp_0056;msp_0062;msp_0063;msp_0082c;msp_0083;msp_0085;msp_0086;msp_0098;msp_0103;msp_0104;msp_0106;msp_0107;msp_0109;msp_0112;msp_0113;msp_0119;msp_0129;msp_0131;msp_0134;msp_0135;msp_0140;msp_0143;msp_0146c;msp_0156;msp_0162;msp_0174;m…	Bacteroides cellulosilyticus;Escherichia coli;Bacteroides intestinalis;[Clostridium] bolteae;Parabacteroides distasonis;Eisenbergiella tayi;Eisenbergiella massiliensis;[Clostridium] clostridioforme 1;Hungatella effluvii;Parabacteroides merdae;Parabacteroides goldsteinii;Klebsiella pneumoniae;Bacteroides salyersiae;unclassified Lachnoclostridium;Anaerobutyricum hallii;unclassified Muribaculaceae;B…	-	-	K05879;K05878	Dak1	-	-	-	-	-	-	K05879;Dak1;K05878
CL-19	6	203	Yes	No	msp_0009;msp_0014;msp_0015;msp_0018;msp_0020;msp_0024;msp_0044;msp_0052;msp_0056;msp_0058;msp_0072;msp_0076;msp_0085;msp_0086;msp_0103;msp_0109;msp_0111;msp_0112;msp_0126;msp_0132;msp_0153;msp_0160;msp_0162;msp_0171;msp_0172;msp_0180;msp_0182;msp_0193;msp_0208;msp_0231;msp_0232;msp_0244;msp_0246;msp_0250;msp_0268;msp_0269;msp_0274;msp_0278;msp_0301;msp_0303;msp_0309;msp_0312;msp_0314;msp_0317;msp…	[Clostridium] bolteae;Eisenbergiella tayi;Roseburia faecis;Eisenbergiella massiliensis;[Clostridium] clostridioforme 1;Hungatella effluvii;Hungatella hathewayi 1;Blautia sp. CAG:257;unclassified Lachnoclostridium;[Ruminococcus] gnavus;Roseburia inulinivorans;Blautia wexlerae;unclassified Eisenbergiella;[Clostridium] symbiosum;[Clostridium] innocuum;[Clostridium] scindens 2;Faecalimonas umbilicata…	M00205:N-Acetylglucosamine transport system	Saccharide, polyol, and lipid transport system	K15533;K10202	Lact_bio_phlase;LBP_C;LBP_M	-	cazy.GH112	-	-	-	-	K15533;Lact_bio_phlase;LBP_C;LBP_M;cazy.GH112;K10202
CL-294	5	203	Yes	No	msp_0003;msp_0007;msp_0008;msp_0010;msp_0011;msp_0016;msp_0019;msp_0021;msp_0022;msp_0023;msp_0025;msp_0027;msp_0028;msp_0032;msp_0033;msp_0035;msp_0037;msp_0040;msp_0054;msp_0059;msp_0061;msp_0063;msp_0064;msp_0069;msp_0070;msp_0080;msp_0081;msp_0083;msp_0089;msp_0091;msp_0098;msp_0101;msp_0102;msp_0105;msp_0114;msp_0118;msp_0126;msp_0139;msp_0143;msp_0147;msp_0149;msp_0155;msp_0156;msp_0159;msp…	Bacteroides cellulosilyticus;Bacteroides ovatus;Bacteroides intestinalis;Bacteroides fragilis 1;Bacteroides thetaiotaomicron;Bacteroides plebeius;Bacteroides faecis;Bacteroides xylanisolvens;Bacteroides finegoldii;Bacteroides caccae;Akkermansia muciniphila;Parabacteroides merdae;Parabacteroides goldsteinii;Alistipes onderdonkii;Bacteroides fragilis 2;Bacteroides dorei;Bacteroides salyersiae;Bacte…	-	-	K01205	NAGLU;NAGLU_C;NAGLU_N	-	cazy.GH89	-	-	-	-	K01205;NAGLU;NAGLU_C;NAGLU_N;cazy.GH89
CL-617	3	203	Yes	No	msp_0009;msp_0024;msp_0039;msp_0044;msp_0056;msp_0057;msp_0058;msp_0066;msp_0068;msp_0072;msp_0079;msp_0087;msp_0103;msp_0105;msp_0119;msp_0131;msp_0153;msp_0158;msp_0160;msp_0161;msp_0164;msp_0165;msp_0168;msp_0181;msp_0189;msp_0205;msp_0208;msp_0213;msp_0218;msp_0238;msp_0244;msp_0269;msp_0272;msp_0278;msp_0281;msp_0290;msp_0297;msp_0298;msp_0303;msp_0312;msp_0314;msp_0317;msp_0322;msp_0329;msp…	[Clostridium] bolteae;Hungatella effluvii;Lachnospiraceae bacterium hRUG904 / Clostridiales bacterium RUG495 / [Clostridium] sp. CAG:127;Hungatella hathewayi 1;unclassified Lachnoclostridium;Roseburia sp. CAG:45 & sp. 2789STDY5608886;[Ruminococcus] gnavus;[Clostridium] sp. AT4;[Eubacterium] rectale;Roseburia inulinivorans;[Clostridium] sp. CAG:7;Lachnospira pectinoschiza;[Clostridium] innocuum;Ru…	M00610:PTS system, D-glucosaminate-specific II component	Phosphotransferase system (PTS)	K17074;K17076;K17073	-	-	-	-	-	-	-	K17074;K17076;K17073
CL-366	7	202	Yes	No	msp_0005;msp_0009;msp_0024;msp_0030;msp_0049;msp_0050;msp_0051;msp_0056;msp_0065;msp_0066;msp_0079;msp_0082c;msp_0100;msp_0103;msp_0107;msp_0108;msp_0112;msp_0119;msp_0126;msp_0132;msp_0134;msp_0135;msp_0140;msp_0141;msp_0146c;msp_0153;msp_0157;msp_0160;msp_0164;msp_0174;msp_0188;msp_0200;msp_0209;msp_0231;msp_0233;msp_0246;msp_0250;msp_0254;msp_0278;msp_0281;msp_0301;msp_0306;msp_0323;msp_0329;m…	Escherichia coli;[Clostridium] bolteae;Hungatella effluvii;Klebsiella pneumoniae;unclassified Lachnoclostridium;Anaerobutyricum hallii;unclassified Muribaculaceae;unclassified Lachnoclostridium;[Ruminococcus] sp. CAG:17 / Blautia sp. 2789STDY5608880;[Clostridium] sp. AT4;[Clostridium] sp. CAG:7;Providencia rettgeri 2;Morganella morganii;[Clostridium] innocuum;Anaerostipes hadrus 1;Enterobacter ho…	M00276:PTS system, mannose-specific II component	Phosphotransferase system (PTS)	K02795;K02796;K02794	EII-Sor;EIIA-man;EIID-AGA;PTSIIB_sorb	-	-	-	-	-	-	K02795;K02796;EII-Sor;EIIA-man;EIID-AGA;PTSIIB_sorb;K02794
CL-634	4	201	Yes	No	msp_0014;msp_0017;msp_0018;msp_0024;msp_0025;msp_0030;msp_0044;msp_0050;msp_0052;msp_0058;msp_0066;msp_0070;msp_0074;msp_0076;msp_0085;msp_0089;msp_0092;msp_0094;msp_0099;msp_0100;msp_0104;msp_0106;msp_0109;msp_0110;msp_0111;msp_0112;msp_0119;msp_0126;msp_0134;msp_0140;msp_0145;msp_0146c;msp_0153;msp_0163;msp_0164;msp_0165;msp_0171;msp_0172;msp_0180;msp_0182;msp_0186;msp_0189;msp_0193;msp_0195;ms…	Eisenbergiella tayi;Roseburia intestinalis;Eisenbergiella massiliensis;Hungatella effluvii;Akkermansia muciniphila;Klebsiella pneumoniae;Hungatella hathewayi 1;Anaerobutyricum hallii;Blautia sp. CAG:257;[Ruminococcus] gnavus;[Clostridium] sp. AT4;Akkermansia muciniphila 2;Roseburia sp. CAG:100 / Lachnospiraceae bacterium CIM:MAG 54;Blautia wexlerae;unclassified Eisenbergiella;Alistipes finegoldii…	M00199:L-Arabinose/lactose transport system	Saccharide, polyol, and lipid transport system	K02007;K02008;K02006	CbiM	-	-	-	-	-	-	K02007;K02008;CbiM;K02006
CL-87	3	201	Yes	No	msp_0003;msp_0005;msp_0007;msp_0008;msp_0009;msp_0010;msp_0011;msp_0012;msp_0013;msp_0015;msp_0018;msp_0020;msp_0023;msp_0026;msp_0027;msp_0029;msp_0030;msp_0032;msp_0033;msp_0035;msp_0036;msp_0037;msp_0039;msp_0040;msp_0041;msp_0042;msp_0043;msp_0044;msp_0046;msp_0047;msp_0049;msp_0050;msp_0052;msp_0055;msp_0056;msp_0058;msp_0060;msp_0061;msp_0063;msp_0064;msp_0065;msp_0068;msp_0069;msp_0071;msp…	Bacteroides cellulosilyticus;Escherichia coli;Bacteroides ovatus;Bacteroides intestinalis;[Clostridium] bolteae;Bacteroides fragilis 1;Bacteroides thetaiotaomicron;Parabacteroides distasonis;Ruminococcus bicirculans;Roseburia faecis;Eisenbergiella massiliensis;[Clostridium] clostridioforme 1;Bacteroides caccae;Paraprevotella clara;Parabacteroides merdae;[Eubacterium] eligens;Klebsiella pneumoniae…	-	-	K07484	DDE_Tnp_IS66;DDE_Tnp_IS66_C	-	-	-	-	-	-	DDE_Tnp_IS66;DDE_Tnp_IS66_C;K07484
CL-498	3	200	Yes	No	msp_0010;msp_0011;msp_0012;msp_0016;msp_0019;msp_0023;msp_0025;msp_0027;msp_0028;msp_0033;msp_0035;msp_0037;msp_0038;msp_0040;msp_0043;msp_0046;msp_0054;msp_0059;msp_0061;msp_0069;msp_0070;msp_0080;msp_0083;msp_0084;msp_0096;msp_0098;msp_0101;msp_0102;msp_0114;msp_0117;msp_0118;msp_0123;msp_0126;msp_0128;msp_0132;msp_0139;msp_0143;msp_0151;msp_0152;msp_0153;msp_0155;msp_0164;msp_0171;msp_0184;msp…	Bacteroides fragilis 1;Bacteroides thetaiotaomicron;Parabacteroides distasonis;Bacteroides plebeius;Bacteroides faecis;Bacteroides caccae;Akkermansia muciniphila;Parabacteroides merdae;Parabacteroides goldsteinii;Bacteroides fragilis 2;Bacteroides dorei;Bacteroides salyersiae;unclassified Lentisphaeria;Bacteroides massiliensis;Bacteroides coprocola;Bacteroides uniformis;Bacteroides nordii;Barnesi…	-	-	K01197	NAGidase	-	cazy.GH84	-	-	-	-	K01197;NAGidase;cazy.GH84
CL-680	3	199	Yes	No	msp_0003;msp_0005;msp_0010;msp_0011;msp_0012;msp_0013;msp_0015;msp_0017;msp_0020;msp_0022;msp_0023;msp_0027;msp_0028;msp_0029;msp_0031;msp_0032;msp_0034;msp_0037;msp_0040;msp_0041;msp_0042;msp_0045;msp_0047;msp_0050;msp_0052;msp_0053;msp_0054;msp_0056;msp_0057;msp_0058;msp_0060;msp_0073;msp_0077;msp_0081;msp_0084;msp_0087;msp_0089;msp_0092;msp_0095;msp_0102;msp_0110;msp_0111;msp_0112;msp_0117;msp…	Bacteroides cellulosilyticus;Escherichia coli;Bacteroides fragilis 1;Bacteroides thetaiotaomicron;Parabacteroides distasonis;Ruminococcus bicirculans;Roseburia faecis;Roseburia intestinalis;[Clostridium] clostridioforme 1;Bacteroides finegoldii;Bacteroides caccae;Parabacteroides merdae;Parabacteroides goldsteinii;[Eubacterium] eligens;Bacteroides stercoris;Alistipes onderdonkii;[Faecalibacterium]…	-	-	-	Phage_portal;Terminase_1;Phage_capsid	-	-	-	-	-	-	Phage_portal;Terminase_1;Phage_capsid
CL-344	4	198	Yes	No	msp_0003;msp_0005;msp_0008;msp_0010;msp_0017;msp_0024;msp_0031;msp_0033;msp_0034;msp_0036;msp_0037;msp_0044;msp_0046;msp_0052;msp_0054;msp_0057;msp_0063;msp_0068;msp_0071;msp_0072;msp_0094;msp_0108;msp_0111;msp_0113;msp_0115c;msp_0141;msp_0163;msp_0180;msp_0181;msp_0182;msp_0184;msp_0187;msp_0193;msp_0196;msp_0209;msp_0211;msp_0216;msp_0217;msp_0219;msp_0228;msp_0235;msp_0236;msp_0249;msp_0259;ms…	Bacteroides cellulosilyticus;Escherichia coli;Bacteroides intestinalis;Bacteroides fragilis 1;Roseburia intestinalis;Hungatella effluvii;Bacteroides stercoris;Bacteroides fragilis 2;[Faecalibacterium] sp. CAG:74;Bacteroides eggerthii;Bacteroides salyersiae;Hungatella hathewayi 1;Bacteroides uniformis;Blautia sp. CAG:257;Bacteroides nordii;Roseburia sp. CAG:45 & sp. 2789STDY5608886;Bacteroides cla…	-	-	-	Glyco_hydro_65C;Glyco_hydro_65m;Glyco_hydro_65N	-	cazy.GH65	-	-	-	-	Glyco_hydro_65C;Glyco_hydro_65m;Glyco_hydro_65N;cazy.GH65
CL-4	535	196	Yes	No	msp_0003;msp_0037;msp_0054;msp_0008;msp_0011;msp_0219;msp_1978;msp_0063;msp_0336;msp_1737;msp_0016;msp_0036;msp_0010;msp_0019;msp_0031;msp_0043;msp_0046;msp_0023;msp_0520c;msp_0028;msp_0033;msp_0096;msp_0102;msp_0114;msp_0149;msp_0217;msp_1821;msp_0012;msp_0069;msp_0156;msp_0355;msp_0040;msp_0139;msp_0007;msp_0026;msp_0101;msp_0235;msp_0027;msp_0061;msp_0041;msp_0067;msp_0190;msp_0349;msp_0211;ms…	Bacteroides cellulosilyticus;Bacteroides salyersiae;Bacteroides nordii;Bacteroides intestinalis;Bacteroides thetaiotaomicron;unclassified Bacteroides;unclassified Bacteroidales;Bacteroides clarus;Bacteroides fluxus;Bacteroides stercorirosoris;Bacteroides plebeius;Bacteroides eggerthii;Bacteroides fragilis 1;Bacteroides faecis;Bacteroides stercoris;Bacteroides coprocola;Bacteroides uniformis;Bacte…	M00173:Reductive citrate cycle (Arnon-Buchanan cycle) ;M00376:3-Hydroxypropionate bi-cycle ;M00374:Dicarboxylate-hydroxybutyrate cycle ;M00009:Citrate cycle (TCA cycle, Krebs cycle) ;M00011:Citrate cycle, second carbon oxidation, 2-oxoglutarate => oxaloacetate ;M00093:Phosphatidylethanolamine (PE) biosynthesis, PA => PS => PE ;M00060:Lipopolysaccharide biosynthesis, KDO2-lipid A ;M00063:CMP-KDO b…	Carbon fixation;Central carbohydrate metabolism;Lipid metabolism;Lipopolysaccharide metabolism;Cofactor and vitamin biosynthesis;ATP synthesis;Saccharide, polyol, and lipid transport system;ABC-2 type and other transport systems;Bacterial secretion system;Drug efflux transporter/pump;Drug resistance	K10900;K00895;K01067;K01277;K11131;K15255;K09650;K00210;K00241;K00346;K00347;K00348;K00349;K01278;K01364;K01719;K03269;K03773;K04516;K05591;K07322;K07405;K08676;K12524;K13043;K13378;K14487;K16153;K16327;K16363;K18691;K21556;K21557;K21571;K21574;K21575;K02361;K00024;K00683;K01303;K01676;K01847;K02429;K07588;K00029;K00240;K00249;K00330;K00331;K00337;K00338;K00339;K00341;K00342;K00343;K00350;K00351;…	CBM_20;DUF2723;DUF4271;DUF4296;DUF4301;DUF4468;GSCFA;M64_N;NigD_C;NigD_N;Peptidase_M49;Porin_10;CHU_C;DUF4421;DUF4835;DUF5103;Peptidase_C25;Peptidase_M6;PorP_SprF;SprA_N;A2M;AcylCoA_dehyd_C;BatD;Big_5;Caps_assemb_Wzi;Cyc-maltodext_C;Cyc-maltodext_N;DUF1460;DUF1573;DUF1599;DUF2027;DUF2582;DUF2807;DUF2851;DUF3078;DUF3098;DUF3108;DUF3109;DUF3127;DUF3256;DUF3316;DUF3332;DUF3467;DUF349;DUF3575;DUF3822…	Rv3601c;Rv1932;SFV_1678	cazy.GH13_38;cazy.GT3;cazy.CBM20;cazy.GH13_8;cazy.GH97;cazy.GH133;cazy.GH57;cazy.GH92;cazy.GT30;cazy.GT9;cazy.GT19;cazy.GT83;cazy.CBM72	-	-	-	Thiol peroxidase, Tpx-type (EC 1.11.1.15);Aspartate 1-decarboxylase (EC 4.1.1.11);Superoxide dismutase [Fe] (EC 1.15.1.1)	cazy.GH13_38;cazy.GT3;K10900;CBM_20;DUF2723;DUF4271;DUF4296;DUF4301;DUF4468;GSCFA;M64_N;NigD_C;NigD_N;Peptidase_M49;Porin_10;CHU_C;DUF4421;DUF4835;DUF5103;Peptidase_C25;Peptidase_M6;PorP_SprF;SprA_N;cazy.CBM20;cazy.GH13_8;cazy.GH97;K00895;K01067;K01277;K11131;K15255;K09650;K00210;K00241;K00346;K00347;K00348;K00349;K01278;K01364;K01719;K03269;K03773;K04516;K05591;K07322;K07405;K08676;K12524;K13043…
CL-1438	3	195	Yes	No	msp_0003;msp_0007;msp_0008;msp_0011;msp_0015;msp_0016;msp_0017;msp_0022;msp_0023;msp_0030;msp_0031;msp_0034;msp_0035;msp_0036;msp_0037;msp_0040;msp_0041;msp_0042;msp_0046;msp_0050;msp_0055;msp_0061;msp_0063;msp_0064;msp_0068;msp_0069;msp_0071;msp_0072;msp_0074;msp_0075;msp_0077;msp_0078;msp_0080;msp_0081;msp_0091;msp_0094;msp_0105;msp_0107;msp_0113;msp_0115c;msp_0118;msp_0133;msp_0134;msp_0137;ms…	Bacteroides cellulosilyticus;Bacteroides ovatus;Bacteroides intestinalis;Bacteroides thetaiotaomicron;Roseburia faecis;Bacteroides plebeius;Roseburia intestinalis;Bacteroides finegoldii;Bacteroides caccae;Klebsiella pneumoniae;Bacteroides stercoris;[Faecalibacterium] sp. CAG:74;Bacteroides dorei;Bacteroides eggerthii;Bacteroides salyersiae;Bacteroides massiliensis;Prevotella copri 1;Coprococcus e…	-	-	K01224	Glyco_hydro_53	-	cazy.GH53	-	-	-	-	K01224;Glyco_hydro_53;cazy.GH53
CL-53	3	194	Yes	No	msp_0005;msp_0013;msp_0029;msp_0030;msp_0047;msp_0053;msp_0073;msp_0074;msp_0086;msp_0099;msp_0108;msp_0111;msp_0116;msp_0119;msp_0120;msp_0127;msp_0130;msp_0131;msp_0134;msp_0140;msp_0148c;msp_0150c;msp_0153;msp_0157;msp_0159;msp_0171;msp_0174;msp_0177;msp_0178;msp_0182;msp_0186;msp_0197;msp_0203;msp_0209;msp_0210;msp_0215;msp_0245;msp_0252;msp_0255;msp_0262;msp_0268;msp_0273;msp_0279;msp_0282;m…	Escherichia coli;Ruminococcus bicirculans;[Eubacterium] eligens;Klebsiella pneumoniae;[Eubacterium] sp. CAG:115;[Eubacterium] siraeum;Victivallales bacterium CCUG 44730;Roseburia sp. CAG:100 / Lachnospiraceae bacterium CIM:MAG 54;[Clostridium] symbiosum;Lentisphaeria bacterium UBA1829;Enterobacter hormaechei;Faecalimonas umbilicata;unclassified Lentisphaeria;unclassified Acidaminococcaceae;unclas…	M00034:Methionine salvage pathway ;M00133:Polyamine biosynthesis, arginine => agmatine => putrescine => spermidine	Cysteine and methionine metabolism;Polyamine biosynthesis	K01611	Spermine_synt_N;AdoMet_dc	-	-	-	-	-	-	Spermine_synt_N;AdoMet_dc;K01611
CL-149	3	193	Yes	No	msp_0003;msp_0005;msp_0007;msp_0009;msp_0010;msp_0011;msp_0012;msp_0015;msp_0017;msp_0018;msp_0020;msp_0024;msp_0026;msp_0028;msp_0029;msp_0030;msp_0033;msp_0038;msp_0039;msp_0040;msp_0041;msp_0044;msp_0045;msp_0049;msp_0056;msp_0057;msp_0062;msp_0066;msp_0071;msp_0074;msp_0075;msp_0077;msp_0079;msp_0082c;msp_0086;msp_0087;msp_0094;msp_0098;msp_0100;msp_0102;msp_0108;msp_0110;msp_0112;msp_0117;ms…	Bacteroides cellulosilyticus;Escherichia coli;Bacteroides ovatus;[Clostridium] bolteae;Bacteroides fragilis 1;Bacteroides thetaiotaomicron;Parabacteroides distasonis;Roseburia faecis;Roseburia intestinalis;Eisenbergiella massiliensis;[Clostridium] clostridioforme 1;Hungatella effluvii;Paraprevotella clara;Parabacteroides goldsteinii;[Eubacterium] eligens;Klebsiella pneumoniae;Bacteroides fragilis…	-	-	K03273;K03271	PNK3P	-	-	-	-	-	-	K03273;K03271;PNK3P
CL-532	4	188	Yes	No	msp_0003;msp_0007;msp_0009;msp_0010;msp_0014;msp_0015;msp_0016;msp_0017;msp_0020;msp_0022;msp_0023;msp_0024;msp_0029;msp_0033;msp_0035;msp_0036;msp_0039;msp_0044;msp_0047;msp_0048;msp_0049;msp_0052;msp_0056;msp_0060;msp_0063;msp_0066;msp_0071;msp_0073;msp_0074;msp_0075;msp_0077;msp_0079;msp_0086;msp_0087;msp_0094;msp_0099;msp_0102;msp_0111;msp_0116;msp_0120;msp_0122;msp_0124;msp_0129;msp_0135;msp…	Bacteroides cellulosilyticus;Bacteroides ovatus;[Clostridium] bolteae;Bacteroides fragilis 1;Eisenbergiella tayi;Roseburia faecis;Bacteroides plebeius;Roseburia intestinalis;[Clostridium] clostridioforme 1;Bacteroides finegoldii;Bacteroides caccae;Hungatella effluvii;[Eubacterium] eligens;Bacteroides fragilis 2;Bacteroides dorei;Bacteroides eggerthii;Lachnospiraceae bacterium hRUG904 / Clostridia…	-	-	K00978;K01709;K12452	-	STM474_2175	-	-	-	-	-	K00978;K01709;K12452;STM474_2175
CL-305	3	188	Yes	No	msp_0005;msp_0024;msp_0028;msp_0040;msp_0044;msp_0058;msp_0069;msp_0091;msp_0092;msp_0093;msp_0098;msp_0102;msp_0103;msp_0107;msp_0109;msp_0112;msp_0124;msp_0138;msp_0153;msp_0160;msp_0164;msp_0166;msp_0175;msp_0177;msp_0185;msp_0188;msp_0193;msp_0194;msp_0195;msp_0200;msp_0202;msp_0207;msp_0208;msp_0213;msp_0238;msp_0239;msp_0243;msp_0246;msp_0247;msp_0274;msp_0276;msp_0278;msp_0280;msp_0281;msp…	Escherichia coli;Hungatella effluvii;Parabacteroides goldsteinii;Bacteroides massiliensis;Hungatella hathewayi 1;[Ruminococcus] gnavus;Bacteroides vulgatus;Prevotella sp. CAG:604;Sutterella wadsworthensis 1;[Clostridium] sp. CAG:62;Parabacteroides gordonii;unclassified Bacteroides;[Clostridium] innocuum;Anaerostipes hadrus 1;[Clostridium] scindens 2;Blautia hydrogenotrophica;Candidatus Cibiobacte…	-	-	K01023	Arylsulfotran_N;Arylsulfotrans	-	-	-	-	-	-	Arylsulfotran_N;Arylsulfotrans;K01023
CL-574	3	183	Yes	No	msp_0003;msp_0007;msp_0008;msp_0009;msp_0010;msp_0011;msp_0012;msp_0013;msp_0019;msp_0020;msp_0021;msp_0022;msp_0023;msp_0024;msp_0027;msp_0028;msp_0029;msp_0033;msp_0036;msp_0037;msp_0044;msp_0049;msp_0054;msp_0055;msp_0058;msp_0059;msp_0060;msp_0063;msp_0064;msp_0072;msp_0073;msp_0075;msp_0077;msp_0081;msp_0083;msp_0086;msp_0088;msp_0098;msp_0105;msp_0111;msp_0116;msp_0117;msp_0124;msp_0126;msp…	Bacteroides cellulosilyticus;Bacteroides ovatus;Bacteroides intestinalis;[Clostridium] bolteae;Bacteroides fragilis 1;Bacteroides thetaiotaomicron;Parabacteroides distasonis;Ruminococcus bicirculans;Bacteroides faecis;[Clostridium] clostridioforme 1;Bacteroides xylanisolvens;Bacteroides finegoldii;Bacteroides caccae;Hungatella effluvii;Parabacteroides merdae;Parabacteroides goldsteinii;[Eubacteri…	M00234:Cystine transport system	Phosphate and amino acid transport system	K19068;K17716	Polysacc_syn_2C	-	-	-	-	-	-	K19068;Polysacc_syn_2C;K17716
CL-309	3	176	Yes	No	msp_0106;msp_0131;msp_0144;msp_0147;msp_0150c;msp_0173;msp_0222;msp_0234;msp_0249;msp_0297;msp_0298;msp_0302;msp_0303;msp_0311;msp_0319;msp_0329;msp_0343;msp_0364;msp_0372;msp_0398;msp_0401;msp_0421;msp_0424;msp_0434;msp_0442;msp_0447;msp_0452;msp_0461;msp_0478;msp_0513;msp_0522;msp_0526;msp_0541;msp_0546;msp_0556;msp_0578;msp_0586;msp_0624;msp_0626;msp_0645;msp_0657;msp_0669;msp_0676;msp_0685;ms…	Clostridiales bacterium UBA7273 / Firmicutes bacterium CAG:240;Phascolarctobacterium faecium;[Clostridium] sp. CAG:138;unclassified Ruminococcaceae;[Clostridium] methylpentosum;Christensenellaceae bacterium Phil1 & [Clostridium] sp. CAG:226;[Clostridium] sp. CAG:354_28_25;Catabacter sp. UBA1685 / Clostridia bacterium CIM:MAG 110_1;unclassified Ruminococcaceae;Anaerotruncus sp. AT3;unclassified Ch…	-	-	K13688	Glycoamylase	-	cazy.GT84	-	-	-	-	Glycoamylase;K13688;cazy.GT84
CL-182	3	175	Yes	No	msp_0025;msp_0070;msp_0071;msp_0077;msp_0093;msp_0109;msp_0111;msp_0119;msp_0124;msp_0146c;msp_0153;msp_0172;msp_0192;msp_0197;msp_0213;msp_0221;msp_0232;msp_0243;msp_0245;msp_0246;msp_0260;msp_0265;msp_0281;msp_0299;msp_0301;msp_0306;msp_0307;msp_0315;msp_0328;msp_0329;msp_0340;msp_0345;msp_0359;msp_0364;msp_0366;msp_0380;msp_0388;msp_0389;msp_0391;msp_0399;msp_0400;msp_0403;msp_0404;msp_0411;ms…	Akkermansia muciniphila;Akkermansia muciniphila 2;Roseburia hominis;unclassified Lachnospiraceae;[Clostridium] sp. CAG:62;[Clostridium] scindens 2;Faecalimonas umbilicata;unclassified Acidaminococcaceae;Candidatus Cibiobacter qucibialis;Streptococcus sanguinis;Erysipelatoclostridium ramosum;Ruthenibacterium lactatiformans;unclassified Oscillospiraceae;Megasphaera sp. BL7 & NM10;Flavonifractor pla…	M00761:Undecaprenylphosphate alpha-L-Ara4N biosynthesis, UDP-GlcA => undecaprenyl phosphate alpha-L-Ara4N ;M00721:Cationic antimicrobial peptide (CAMP) resistance, arnBCADTEF operon	Other carbohydrate metabolism;Drug resistance	K05337	Fer4_15;Fer4_13	-	-	-	-	-	-	Fer4_15;K05337;Fer4_13
CL-371	19	174	Yes	No	msp_0009;msp_0052;msp_0057;msp_0066;msp_0076;msp_0079;msp_0094;msp_0112;msp_0141;msp_0142;msp_0162;msp_0163;msp_0165;msp_0168;msp_0171;msp_0181;msp_0182;msp_0186;msp_0189;msp_0207;msp_0208;msp_0237;msp_0243;msp_0244;msp_0254;msp_0272;msp_0308;msp_0309;msp_0321;msp_0402;msp_0436;msp_0459;msp_0542;msp_0014;msp_0017;msp_0018;msp_0024;msp_0044;msp_0048;msp_0055;msp_0056;msp_0060;msp_0065;msp_0071;msp…	[Clostridium] bolteae;Blautia sp. CAG:257;Roseburia sp. CAG:45 & sp. 2789STDY5608886;[Clostridium] sp. AT4;Blautia wexlerae;[Clostridium] sp. CAG:7;unclassified Roseburia;Blautia hydrogenotrophica;Blautia massiliensis;Blautia sp. CAG:52 & SG-772 & sp. 2789STDY5834917;unclassified Blautia;Firmicutes bacterium CAG:227;unclassified Lachnospiraceae;Firmicutes bacterium CAG:194;Blautia hansenii;unclas…	M00565:Trehalose biosynthesis, D-glucose 1P => trehalose	Other carbohydrate metabolism	K01214;K06331;K03706;K06403;K06404;K00557;K06182;K07502;K11184;K02278	DUF3881;DUF885;CodY;PrcB_C;SporV_AA;SpoVAB;HTH_CodY;Flp1_like	-	cazy.GH13_11	-	-	-	-	K01214;K06331;DUF3881;DUF885;K03706;CodY;K06403;K06404;PrcB_C;SporV_AA;SpoVAB;cazy.GH13_11;K00557;HTH_CodY;K06182;K07502;K11184;Flp1_like;K02278
CL-62	5	172	Yes	No	msp_0005;msp_0009;msp_0020;msp_0024;msp_0049;msp_0052;msp_0056;msp_0058;msp_0066;msp_0076;msp_0079;msp_0100;msp_0109;msp_0110;msp_0113;msp_0115c;msp_0121;msp_0152;msp_0162;msp_0173;msp_0180;msp_0189;msp_0192;msp_0193;msp_0200;msp_0205;msp_0208;msp_0213;msp_0233;msp_0234;msp_0244;msp_0253;msp_0254;msp_0272;msp_0276;msp_0303;msp_0306;msp_0317;msp_0331;msp_0352;msp_0356;msp_0361;msp_0362;msp_0364;ms…	Escherichia coli;[Clostridium] bolteae;[Clostridium] clostridioforme 1;Hungatella effluvii;unclassified Lachnoclostridium;Blautia sp. CAG:257;unclassified Lachnoclostridium;[Ruminococcus] gnavus;[Clostridium] sp. AT4;Blautia wexlerae;[Clostridium] sp. CAG:7;Morganella morganii;[Clostridium] scindens 2;Bilophila wadsworthia;Blautia producta 2;Lachnoclostridium phytofermentans 2;Oscillibacter sp. C…	M00546:Purine degradation, xanthine => urea ;M00046:Pyrimidine degradation, uracil => beta-alanine, thymine => 3-aminoisobutanoate ;M00845:Arginine biosynthesis, glutamate => acetylcitrulline => arginine	Purine metabolism;Pyrimidine metabolism;Arginine and proline metabolism	K01464;K09065;K12527;K13479;K00087	-	-	-	-	-	-	-	K01464;K09065;K12527;K13479;K00087
CL-581	3	172	Yes	No	msp_0005;msp_0014;msp_0017;msp_0024;msp_0029;msp_0030;msp_0056;msp_0071;msp_0077;msp_0094;msp_0103;msp_0108;msp_0110;msp_0112;msp_0131;msp_0132;msp_0140;msp_0157;msp_0172;msp_0173;msp_0177;msp_0178;msp_0181;msp_0192;msp_0195;msp_0204;msp_0205;msp_0208;msp_0209;msp_0210;msp_0218;msp_0240;msp_0242;msp_0244;msp_0253;msp_0278;msp_0286;msp_0306;msp_0312;msp_0319;msp_0323;msp_0325;msp_0329;msp_0331;msp…	Escherichia coli;Eisenbergiella tayi;Roseburia intestinalis;Hungatella effluvii;[Eubacterium] eligens;Klebsiella pneumoniae;unclassified Lachnoclostridium;Roseburia hominis;unclassified Lachnospiraceae;unclassified Roseburia;[Clostridium] innocuum;Enterobacter hormaechei;Bilophila wadsworthia;Blautia hydrogenotrophica;Phascolarctobacterium faecium;Coprobacillus cateniformis;Klebsiella oxytoca;Kle…	-	-	K02042;K02044;K02041	-	-	-	-	-	-	-	K02042;K02044;K02041
CL-155	3	171	Yes	No	msp_0005;msp_0007;msp_0008;msp_0011;msp_0019;msp_0021;msp_0023;msp_0029;msp_0030;msp_0031;msp_0033;msp_0036;msp_0037;msp_0040;msp_0045;msp_0046;msp_0048;msp_0053;msp_0058;msp_0061;msp_0062;msp_0063;msp_0067;msp_0069;msp_0072;msp_0082c;msp_0087;msp_0090;msp_0095;msp_0108;msp_0112;msp_0114;msp_0118;msp_0122;msp_0125;msp_0126;msp_0132;msp_0134;msp_0140;msp_0143;msp_0148c;msp_0150c;msp_0153;msp_0154;…	Escherichia coli;Bacteroides ovatus;Bacteroides intestinalis;Bacteroides thetaiotaomicron;Bacteroides faecis;Bacteroides xylanisolvens;Bacteroides caccae;[Eubacterium] eligens;Klebsiella pneumoniae;Bacteroides stercoris;Bacteroides fragilis 2;Bacteroides eggerthii;Bacteroides salyersiae;Bacteroides massiliensis;Ruminococcus bromii 2;Bacteroides uniformis;[Eubacterium] sp. CAG:38;[Eubacterium] sir…	-	-	K09790	DUF454;YgbA_NO	-	-	-	-	-	-	DUF454;YgbA_NO;K09790
CL-399	7	170	Yes	No	msp_0005;msp_0009;msp_0020;msp_0024;msp_0030;msp_0049;msp_0052;msp_0055;msp_0056;msp_0074;msp_0079;msp_0082c;msp_0092;msp_0100;msp_0108;msp_0110;msp_0111;msp_0135;msp_0140;msp_0145;msp_0157;msp_0163;msp_0174;msp_0180;msp_0189;msp_0193;msp_0197;msp_0202;msp_0209;msp_0228;msp_0239;msp_0241;msp_0245;msp_0253;msp_0266;msp_0272;msp_0280;msp_0288;msp_0315;msp_0329;msp_0338;msp_0347;msp_0359;msp_0362;ms…	Escherichia coli;[Clostridium] bolteae;[Clostridium] clostridioforme 1;Hungatella effluvii;Klebsiella pneumoniae;unclassified Lachnoclostridium;Blautia sp. CAG:257;Firmicutes bacterium CAG:65 / [Clostridium] sp. 2789STDY5608883;unclassified Lachnoclostridium;Roseburia sp. CAG:100 / Lachnospiraceae bacterium CIM:MAG 54;[Clostridium] sp. CAG:7;Providencia rettgeri 2;Sutterella wadsworthensis 1;Morg…	-	-	K03750	MobB;MoeA_C;MoeA_N;Molybdop_Fe4S4;Molybdopterin;Molydop_binding	-	-	-	-	-	-	MobB;MoeA_C;MoeA_N;Molybdop_Fe4S4;Molybdopterin;Molydop_binding;K03750
CL-543	5	168	Yes	No	msp_0002;msp_0003;msp_0005;msp_0007;msp_0008;msp_0009;msp_0010;msp_0011;msp_0012;msp_0018;msp_0019;msp_0020;msp_0021;msp_0023;msp_0024;msp_0026;msp_0027;msp_0028;msp_0030;msp_0031;msp_0033;msp_0035;msp_0037;msp_0040;msp_0044;msp_0046;msp_0049;msp_0054;msp_0056;msp_0059;msp_0061;msp_0062;msp_0063;msp_0069;msp_0082c;msp_0083;msp_0085;msp_0086;msp_0088;msp_0097;msp_0098;msp_0099;msp_0100;msp_0102;ms…	Blastocystis sp. subtype 1;Bacteroides cellulosilyticus;Escherichia coli;Bacteroides ovatus;Bacteroides intestinalis;[Clostridium] bolteae;Bacteroides fragilis 1;Bacteroides thetaiotaomicron;Parabacteroides distasonis;Eisenbergiella massiliensis;Bacteroides faecis;[Clostridium] clostridioforme 1;Bacteroides xylanisolvens;Bacteroides caccae;Hungatella effluvii;Paraprevotella clara;Parabacteroides …	-	-	K00036;K00033	6PGD;G6PD_C;G6PD_N	-	-	-	-	-	-	K00036;6PGD;G6PD_C;G6PD_N;K00033
CL-430	8	164	Yes	No	msp_0003;msp_0008;msp_0065;msp_0076;msp_0127;msp_0137;msp_0142;msp_0154;msp_0162;msp_0163;msp_0164;msp_0165;msp_0178;msp_0180;msp_0181;msp_0182;msp_0205;msp_0208;msp_0218;msp_0232;msp_0262;msp_0266;msp_0270;msp_0282;msp_0289;msp_0291;msp_0305;msp_0324;msp_0344;msp_0348;msp_0353;msp_0354;msp_0361;msp_0367;msp_0372;msp_0379;msp_0404;msp_0405;msp_0424;msp_0447;msp_0449;msp_0451;msp_0453;msp_0473c;ms…	Bacteroides cellulosilyticus;Bacteroides intestinalis;[Ruminococcus] sp. CAG:17 / Blautia sp. 2789STDY5608880;Blautia wexlerae;Ruminococcus sp. CAG:353 & sp. 2789STDY5834938;unclassified Prevotella;Blautia sp. CAG:52 & SG-772 & sp. 2789STDY5834917;Fusicatenibacter saccharivorans;unclassified Blautia;Firmicutes bacterium CAG:227;[Ruminococcus] sp. 2789STDY5608794 & sp. 2789STDY5834890 / Firmicutes…	M00567:Methanogenesis, CO2 => methane ;M00357:Methanogenesis, acetate => methane ;M00356:Methanogenesis, methanol => methane ;M00563:Methanogenesis, methylamine/dimethylamine/trimethylamine	Methane metabolism	K03388;K03389;K03390;K14127;K17995;K17996;K00125	FlpD	-	-	-	-	-	-	K03388;K03389;K03390;K14127;K17995;K17996;FlpD;K00125
CL-488	3	164	Yes	No	msp_0003;msp_0007;msp_0008;msp_0010;msp_0011;msp_0014;msp_0015;msp_0016;msp_0017;msp_0018;msp_0019;msp_0021;msp_0022;msp_0025;msp_0026;msp_0031;msp_0032;msp_0033;msp_0035;msp_0036;msp_0037;msp_0041;msp_0043;msp_0044;msp_0047;msp_0054;msp_0055;msp_0061;msp_0063;msp_0067;msp_0069;msp_0071;msp_0074;msp_0075;msp_0077;msp_0078;msp_0084;msp_0085;msp_0089;msp_0093;msp_0094;msp_0097;msp_0101;msp_0102;msp…	Bacteroides cellulosilyticus;Bacteroides ovatus;Bacteroides intestinalis;Bacteroides fragilis 1;Bacteroides thetaiotaomicron;Eisenbergiella tayi;Roseburia faecis;Bacteroides plebeius;Roseburia intestinalis;Eisenbergiella massiliensis;Bacteroides faecis;Bacteroides xylanisolvens;Bacteroides finegoldii;Akkermansia muciniphila;Paraprevotella clara;Bacteroides stercoris;Alistipes onderdonkii;Bacteroi…	M00442:Putative hydroxymethylpyrimidine transport system	Mineral and organic ion transport system	K12604	Glyco_hydro_115	-	cazy.GH115	-	-	-	-	K12604;Glyco_hydro_115;cazy.GH115
CL-571	3	164	Yes	No	msp_0005;msp_0007;msp_0010;msp_0011;msp_0012;msp_0016;msp_0019;msp_0022;msp_0023;msp_0026;msp_0027;msp_0028;msp_0032;msp_0033;msp_0037;msp_0040;msp_0041;msp_0043;msp_0054;msp_0061;msp_0067;msp_0069;msp_0078;msp_0080;msp_0083;msp_0084;msp_0090;msp_0091;msp_0096;msp_0098;msp_0101;msp_0102;msp_0114;msp_0118;msp_0122;msp_0123;msp_0137;msp_0139;msp_0143;msp_0149;msp_0155;msp_0156;msp_0176;msp_0187;msp…	Escherichia coli;Bacteroides ovatus;Bacteroides fragilis 1;Bacteroides thetaiotaomicron;Parabacteroides distasonis;Bacteroides plebeius;Bacteroides faecis;Bacteroides finegoldii;Bacteroides caccae;Paraprevotella clara;Parabacteroides merdae;Parabacteroides goldsteinii;Alistipes onderdonkii;Bacteroides fragilis 2;Bacteroides salyersiae;Bacteroides massiliensis;Prevotella copri 1;Bacteroides coproc…	-	-	K18928;K18929;K00782	-	-	-	-	-	-	-	K18928;K18929;K00782
CL-352	7	161	Yes	No	msp_0005;msp_0012;msp_0014;msp_0018;msp_0025;msp_0030;msp_0038;msp_0059;msp_0070;msp_0082c;msp_0083;msp_0092;msp_0098;msp_0100;msp_0108;msp_0110;msp_0134;msp_0139;msp_0145;msp_0148c;msp_0167c;msp_0174;msp_0185;msp_0195;msp_0201;msp_0202;msp_0209;msp_0212;msp_0226;msp_0228;msp_0239;msp_0280;msp_0285;msp_0288;msp_0295;msp_0303;msp_0310;msp_0313;msp_0317;msp_0319;msp_0359;msp_0362;msp_0382;msp_0383;…	Escherichia coli;Parabacteroides distasonis;Eisenbergiella tayi;Eisenbergiella massiliensis;Akkermansia muciniphila;Klebsiella pneumoniae;unclassified Lentisphaeria;Barnesiella intestinihominis;Akkermansia muciniphila 2;Providencia rettgeri 2;Parabacteroides johnsonii;Sutterella wadsworthensis 1;Parabacteroides gordonii;Morganella morganii;Enterobacter hormaechei;Bilophila wadsworthia;Megamonas f…	-	-	K04654;K04656;K04653	HupF_HypC;HypD;zf-HYPF;NiFeSe_Hases	-	-	-	-	-	-	K04654;K04656;HupF_HypC;HypD;zf-HYPF;K04653;NiFeSe_Hases
CL-233	4	160	Yes	No	msp_0005;msp_0009;msp_0020;msp_0024;msp_0030;msp_0044;msp_0049;msp_0056;msp_0057;msp_0058;msp_0066;msp_0068;msp_0071;msp_0075;msp_0079;msp_0082c;msp_0103;msp_0107;msp_0108;msp_0111;msp_0132;msp_0134;msp_0135;msp_0140;msp_0146c;msp_0153;msp_0157;msp_0160;msp_0177;msp_0188;msp_0209;msp_0228;msp_0231;msp_0233;msp_0236;msp_0241;msp_0254;msp_0265;msp_0266;msp_0274;msp_0278;msp_0281;msp_0289;msp_0329;m…	Escherichia coli;[Clostridium] bolteae;[Clostridium] clostridioforme 1;Hungatella effluvii;Klebsiella pneumoniae;Hungatella hathewayi 1;unclassified Lachnoclostridium;unclassified Lachnoclostridium;Roseburia sp. CAG:45 & sp. 2789STDY5608886;[Ruminococcus] gnavus;[Clostridium] sp. AT4;[Eubacterium] rectale;Roseburia hominis;Lachnospiraceae bacterium GAM79 / [Clostridium] sp. CAG:91 & sp. 2789STDY5…	M00275:PTS system, cellobiose-specific II component	Phosphotransferase system (PTS)	K02761;K02760;K02759	PTS_IIA	-	-	-	-	-	-	K02761;K02760;PTS_IIA;K02759
CL-194	3	160	Yes	No	msp_0009;msp_0014;msp_0015;msp_0017;msp_0018;msp_0024;msp_0029;msp_0039;msp_0044;msp_0049;msp_0052;msp_0055;msp_0056;msp_0057;msp_0060;msp_0065;msp_0066;msp_0068;msp_0071;msp_0072;msp_0074;msp_0075;msp_0076;msp_0077;msp_0079;msp_0085;msp_0086;msp_0094;msp_0112;msp_0113;msp_0125;msp_0129;msp_0141;msp_0142;msp_0154;msp_0160;msp_0162;msp_0163;msp_0164;msp_0165;msp_0168;msp_0175;msp_0177;msp_0180;msp…	[Clostridium] bolteae;Eisenbergiella tayi;Roseburia faecis;Roseburia intestinalis;Eisenbergiella massiliensis;Hungatella effluvii;[Eubacterium] eligens;Lachnospiraceae bacterium hRUG904 / Clostridiales bacterium RUG495 / [Clostridium] sp. CAG:127;Hungatella hathewayi 1;unclassified Lachnoclostridium;Blautia sp. CAG:257;Firmicutes bacterium CAG:65 / [Clostridium] sp. 2789STDY5608883;unclassified L…	-	-	K09693;K09692	Wzt_C	-	-	-	-	-	-	K09693;K09692;Wzt_C
CL-553	4	159	Yes	No	msp_0003;msp_0005;msp_0007;msp_0008;msp_0010;msp_0011;msp_0019;msp_0021;msp_0023;msp_0025;msp_0028;msp_0030;msp_0033;msp_0049;msp_0061;msp_0070;msp_0082c;msp_0098;msp_0100;msp_0106;msp_0108;msp_0110;msp_0112;msp_0119;msp_0134;msp_0138;msp_0145;msp_0156;msp_0166;msp_0167c;msp_0170;msp_0174;msp_0183;msp_0195;msp_0201;msp_0202;msp_0215;msp_0220;msp_0226;msp_0228;msp_0234;msp_0235;msp_0253;msp_0263;m…	Bacteroides cellulosilyticus;Escherichia coli;Bacteroides ovatus;Bacteroides intestinalis;Bacteroides fragilis 1;Bacteroides thetaiotaomicron;Bacteroides faecis;Bacteroides xylanisolvens;Bacteroides caccae;Akkermansia muciniphila;Parabacteroides goldsteinii;Klebsiella pneumoniae;Bacteroides fragilis 2;unclassified Lachnoclostridium;Bacteroides congonensis;Akkermansia muciniphila 2;Providencia ret…	M00346:Formaldehyde assimilation, serine pathway	Methane metabolism	K01902;K01903	ATP-grasp_2;Ligase_CoA	-	-	-	-	-	-	K01902;ATP-grasp_2;Ligase_CoA;K01903
CL-583	4	158	Yes	No	msp_0005;msp_0009;msp_0020;msp_0024;msp_0030;msp_0044;msp_0049;msp_0056;msp_0057;msp_0065;msp_0066;msp_0079;msp_0082c;msp_0086;msp_0100;msp_0104;msp_0113;msp_0129;msp_0135;msp_0138;msp_0140;msp_0141;msp_0142;msp_0157;msp_0166;msp_0172;msp_0174;msp_0193;msp_0203;msp_0209;msp_0233;msp_0237;msp_0241;msp_0242;msp_0254;msp_0259;msp_0263;msp_0279;msp_0288;msp_0289;msp_0292;msp_0297;msp_0308;msp_0314;ms…	Escherichia coli;[Clostridium] bolteae;[Clostridium] clostridioforme 1;Hungatella effluvii;Klebsiella pneumoniae;Hungatella hathewayi 1;unclassified Lachnoclostridium;unclassified Lachnoclostridium;Roseburia sp. CAG:45 & sp. 2789STDY5608886;[Ruminococcus] sp. CAG:17 / Blautia sp. 2789STDY5608880;[Clostridium] sp. AT4;[Clostridium] sp. CAG:7;Providencia rettgeri 2;[Clostridium] symbiosum;Morganell…	M00545:Trans-cinnamate degradation, trans-cinnamate => acetyl-CoA ;M00569:Catechol meta-cleavage, catechol => acetyl-CoA / 4-methylcatechol => propanoyl-CoA	Aromatic amino acid metabolism;Aromatics degradation	K02053;K02054;K02055;K02052	-	-	-	-	-	-	-	K02053;K02054;K02055;K02052
CL-251	5	155	Yes	No	msp_0013;msp_0038;msp_0042;msp_0045;msp_0048;msp_0053;msp_0065;msp_0071;msp_0093;msp_0105;msp_0131;msp_0141;msp_0154;msp_0175;msp_0179;msp_0181;msp_0194;msp_0206;msp_0207;msp_0212;msp_0221;msp_0232;msp_0236;msp_0238;msp_0242;msp_0243;msp_0247;msp_0250;msp_0271;msp_0277;msp_0299;msp_0302;msp_0305;msp_0315;msp_0321;msp_0322;msp_0337;msp_0343;msp_0353;msp_0378;msp_0383;msp_0393;msp_0431;msp_0441;msp…	Ruminococcus bicirculans;unclassified Lentisphaeria;Coprococcus eutactus 2;Ruminococcus bromii 2;[Eubacterium] sp. CAG:38;[Eubacterium] siraeum;[Ruminococcus] sp. CAG:17 / Blautia sp. 2789STDY5608880;Roseburia hominis;[Clostridium] sp. CAG:62;Ruminococcus sp. CAG:177;Phascolarctobacterium faecium;Blautia massiliensis;Fusicatenibacter saccharivorans;Lachnospiraceae bacterium TF01-11 / [Clostridium…	-	-	K19137	Cas9_REC;Cas_Csn2;Cas9_PI;Cas9-BH	-	-	-	-	-	-	Cas9_REC;Cas_Csn2;Cas9_PI;K19137;Cas9-BH
CL-606	3	154	Yes	No	msp_0009;msp_0017;msp_0020;msp_0024;msp_0044;msp_0049;msp_0056;msp_0058;msp_0066;msp_0086;msp_0094;msp_0104;msp_0109;msp_0110;msp_0111;msp_0112;msp_0113;msp_0131;msp_0132;msp_0135;msp_0148c;msp_0166;msp_0172;msp_0180;msp_0181;msp_0186;msp_0240;msp_0253;msp_0269;msp_0274;msp_0276;msp_0295;msp_0297;msp_0299;msp_0308;msp_0311;msp_0313;msp_0314;msp_0317;msp_0323;msp_0329;msp_0333;msp_0346;msp_0361;ms…	[Clostridium] bolteae;Roseburia intestinalis;[Clostridium] clostridioforme 1;Hungatella effluvii;Hungatella hathewayi 1;unclassified Lachnoclostridium;unclassified Lachnoclostridium;[Ruminococcus] gnavus;[Clostridium] sp. AT4;[Clostridium] symbiosum;unclassified Roseburia;Emergencia timonensis;[Clostridium] scindens 2;Bilophila wadsworthia;Faecalimonas umbilicata;Blautia hydrogenotrophica;Blautia…	M00476:ComP-ComA (competence) two-component regulatory system	Two-component regulatory system	K01473	Hydant_A_N;Hydantoinase_A	-	-	-	-	-	-	Hydant_A_N;Hydantoinase_A;K01473
CL-156	3	152	Yes	No	msp_0003;msp_0007;msp_0008;msp_0010;msp_0011;msp_0012;msp_0014;msp_0015;msp_0016;msp_0018;msp_0019;msp_0021;msp_0022;msp_0023;msp_0024;msp_0026;msp_0027;msp_0028;msp_0032;msp_0037;msp_0041;msp_0043;msp_0046;msp_0047;msp_0052;msp_0054;msp_0055;msp_0057;msp_0061;msp_0063;msp_0064;msp_0072;msp_0075;msp_0084;msp_0085;msp_0091;msp_0094;msp_0097;msp_0098;msp_0101;msp_0106;msp_0115c;msp_0118;msp_0137;ms…	Bacteroides cellulosilyticus;Bacteroides ovatus;Bacteroides intestinalis;Bacteroides fragilis 1;Bacteroides thetaiotaomicron;Parabacteroides distasonis;Eisenbergiella tayi;Roseburia faecis;Bacteroides plebeius;Eisenbergiella massiliensis;Bacteroides faecis;Bacteroides xylanisolvens;Bacteroides finegoldii;Bacteroides caccae;Hungatella effluvii;Paraprevotella clara;Parabacteroides merdae;Parabacter…	M00600:alpha-1,4-Digalacturonate transport system	Saccharide, polyol, and lipid transport system	K01201	Glyco_hydro_30;Glyco_hydro_30C	-	-	-	-	-	-	Glyco_hydro_30;K01201;Glyco_hydro_30C
CL-437	4	151	Yes	No	msp_0007;msp_0009;msp_0010;msp_0011;msp_0012;msp_0014;msp_0016;msp_0018;msp_0021;msp_0022;msp_0023;msp_0025;msp_0026;msp_0028;msp_0033;msp_0035;msp_0036;msp_0037;msp_0040;msp_0043;msp_0054;msp_0058;msp_0060;msp_0067;msp_0074;msp_0077;msp_0083;msp_0097;msp_0098;msp_0125;msp_0188;msp_0194;msp_0224;msp_0363;msp_0373;msp_0387;msp_0412;msp_1188;msp_1834;msp_0003;msp_0006;msp_0008;msp_0017;msp_0027;msp…	Bacteroides ovatus;[Clostridium] bolteae;Bacteroides fragilis 1;Bacteroides thetaiotaomicron;Parabacteroides distasonis;Eisenbergiella tayi;Bacteroides plebeius;Eisenbergiella massiliensis;Bacteroides xylanisolvens;Bacteroides finegoldii;Bacteroides caccae;Akkermansia muciniphila;Paraprevotella clara;Parabacteroides goldsteinii;Bacteroides fragilis 2;Bacteroides dorei;Bacteroides eggerthii;Bacter…	-	-	K20883;K21367	Glyco_transf_11	-	cazy.GT11	-	-	-	-	K20883;K21367;Glyco_transf_11;cazy.GT11
CL-224	4	149	Yes	No	msp_0025;msp_0070;msp_0110;msp_0119;msp_0130;msp_0131;msp_0134;msp_0197;msp_0201;msp_0212;msp_0215;msp_0221;msp_0245;msp_0253;msp_0266;msp_0279;msp_0289;msp_0328;msp_0338;msp_0359;msp_0366;msp_0383;msp_0406;msp_0409;msp_0411;msp_0413;msp_0426;msp_0465;msp_0483;msp_0488;msp_0501;msp_0503;msp_0532;msp_0538;msp_0557;msp_0564;msp_0574c;msp_0580;msp_0594;msp_0603c;msp_0610;msp_0649;msp_0659;msp_0660;m…	Akkermansia muciniphila;Akkermansia muciniphila 2;Bilophila wadsworthia;unclassified Acidaminococcaceae;Candidatus Gastranaerophilales bacterium x14;Phascolarctobacterium faecium;Megamonas funiformis == rupellensis;Megasphaera sp. BL7 & NM10;Akkermansia sp. KLE1605;Dialister invisus;Dialister sp. Marseille-P5638 & CAG:357;Acidaminococcus intestini;Megasphaera massiliensis;unclassified Bilophila;F…	M00331:Type II general secretion system	Bacterial secretion system	K09949;K02456	Secretin;LpxI_C	-	-	-	-	-	-	K09949;Secretin;K02456;LpxI_C
CL-388	10	145	Yes	No	msp_0009;msp_0020;msp_0049;msp_0079;msp_0086;msp_0092;msp_0129;msp_0144;msp_0163;msp_0171;msp_0173;msp_0182;msp_0186;msp_0203;msp_0218;msp_0221;msp_0233;msp_0234;msp_0240;msp_0254;msp_0259;msp_0268;msp_0269;msp_0270;msp_0289;msp_0308;msp_0309;msp_0338;msp_0342;msp_0352;msp_0356;msp_0357;msp_0361;msp_0384;msp_0385;msp_0388;msp_0457;msp_0462;msp_0488;msp_0513;msp_0552;msp_0622;msp_0649;msp_0678;msp…	[Clostridium] bolteae;[Clostridium] clostridioforme 1;unclassified Lachnoclostridium;[Clostridium] sp. CAG:7;[Clostridium] symbiosum;Sutterella wadsworthensis 1;[Clostridium] sp. CAG:58;[Clostridium] sp. CAG:138;Firmicutes bacterium CAG:227;Blautia hansenii;Christensenellaceae bacterium Phil1 & [Clostridium] sp. CAG:226;Firmicutes bacterium CAG:424;[Clostridium] sp. CAG:299;Negativibacillus massi…	-	-	K01643;K01646;K01910;K01644;K13927	ACP;C-C_Bond_Lyase;CitF;CitG;CitX	-	-	-	-	-	-	K01643;K01646;K01910;ACP;C-C_Bond_Lyase;CitF;CitG;CitX;K01644;K13927
CL-692	4	144	Yes	No	msp_0003;msp_0007;msp_0008;msp_0010;msp_0011;msp_0012;msp_0014;msp_0019;msp_0021;msp_0022;msp_0024;msp_0027;msp_0032;msp_0033;msp_0037;msp_0043;msp_0044;msp_0054;msp_0059;msp_0062;msp_0073;msp_0083;msp_0085;msp_0096;msp_0098;msp_0102;msp_0116;msp_0118;msp_0120;msp_0125;msp_0136;msp_0143;msp_0155;msp_0156;msp_0159;msp_0172;msp_0176;msp_0198;msp_0214;msp_0217;msp_0218;msp_0219;msp_0224;msp_0235;msp…	Bacteroides cellulosilyticus;Bacteroides ovatus;Bacteroides intestinalis;Bacteroides fragilis 1;Bacteroides thetaiotaomicron;Parabacteroides distasonis;Eisenbergiella tayi;Bacteroides faecis;Bacteroides xylanisolvens;Bacteroides finegoldii;Hungatella effluvii;Parabacteroides merdae;Alistipes onderdonkii;Bacteroides fragilis 2;Bacteroides salyersiae;Bacteroides coprocola;Hungatella hathewayi 1;Bac…	-	-	-	DUF4964;DUF4965;DUF5127;DUF1793	-	-	-	-	-	-	DUF4964;DUF4965;DUF5127;DUF1793
CL-1441	3	143	Yes	No	msp_0003;msp_0007;msp_0008;msp_0010;msp_0011;msp_0012;msp_0014;msp_0016;msp_0018;msp_0019;msp_0021;msp_0022;msp_0023;msp_0024;msp_0025;msp_0027;msp_0028;msp_0031;msp_0033;msp_0037;msp_0040;msp_0041;msp_0043;msp_0047;msp_0051;msp_0054;msp_0059;msp_0061;msp_0063;msp_0064;msp_0069;msp_0070;msp_0077;msp_0080;msp_0083;msp_0085;msp_0089;msp_0096;msp_0098;msp_0101;msp_0102;msp_0114;msp_0118;msp_0123;msp…	Bacteroides cellulosilyticus;Bacteroides ovatus;Bacteroides intestinalis;Bacteroides fragilis 1;Bacteroides thetaiotaomicron;Parabacteroides distasonis;Eisenbergiella tayi;Bacteroides plebeius;Eisenbergiella massiliensis;Bacteroides faecis;Bacteroides xylanisolvens;Bacteroides finegoldii;Bacteroides caccae;Hungatella effluvii;Akkermansia muciniphila;Parabacteroides merdae;Parabacteroides goldstei…	-	-	K01134;K01130	DUF4994	-	-	-	-	-	-	K01134;DUF4994;K01130
CL-274	3	141	Yes	No	msp_0001;msp_0003;msp_0005;msp_0007;msp_0008;msp_0010;msp_0011;msp_0012;msp_0016;msp_0019;msp_0022;msp_0023;msp_0025;msp_0027;msp_0028;msp_0030;msp_0031;msp_0032;msp_0033;msp_0036;msp_0037;msp_0040;msp_0043;msp_0046;msp_0054;msp_0061;msp_0062;msp_0063;msp_0069;msp_0070;msp_0082c;msp_0083;msp_0088;msp_0089;msp_0090;msp_0096;msp_0100;msp_0101;msp_0102;msp_0108;msp_0114;msp_0117;msp_0128;msp_0140;ms…	Blastocystis sp. subtype 3;Bacteroides cellulosilyticus;Escherichia coli;Bacteroides ovatus;Bacteroides intestinalis;Bacteroides fragilis 1;Bacteroides thetaiotaomicron;Parabacteroides distasonis;Bacteroides plebeius;Bacteroides faecis;Bacteroides finegoldii;Bacteroides caccae;Akkermansia muciniphila;Parabacteroides merdae;Parabacteroides goldsteinii;Klebsiella pneumoniae;Bacteroides stercoris;Al…	-	-	K03644;K03801;K00281	-	-	-	-	-	-	-	K03644;K03801;K00281
CL-586	3	141	Yes	No	msp_0005;msp_0014;msp_0030;msp_0038;msp_0067;msp_0092;msp_0108;msp_0115c;msp_0140;msp_0144;msp_0147;msp_0150c;msp_0173;msp_0174;msp_0176;msp_0177;msp_0192;msp_0203;msp_0204;msp_0209;msp_0229;msp_0234;msp_0241;msp_0242;msp_0257;msp_0258;msp_0279;msp_0280;msp_0295;msp_0302;msp_0303;msp_0331;msp_0340;msp_0357;msp_0369;msp_0370;msp_0391;msp_0396;msp_0398;msp_0400;msp_0409;msp_0410;msp_0421;msp_0423;m…	Escherichia coli;Eisenbergiella tayi;Klebsiella pneumoniae;unclassified Lentisphaeria;Prevotella sp. 109 & CAG:255;Sutterella wadsworthensis 1;Enterobacter hormaechei;Lachnoclostridium phytofermentans 2;Klebsiella oxytoca;[Clostridium] sp. CAG:138;unclassified Ruminococcaceae;[Clostridium] methylpentosum;Christensenellaceae bacterium Phil1 & [Clostridium] sp. CAG:226;Klebsiella quasipneumoniae;Pr…	-	-	K01975	2_5_RNA_ligase2;LigT_PEase	-	-	-	-	-	-	2_5_RNA_ligase2;LigT_PEase;K01975
CL-343	4	139	Yes	No	msp_0003;msp_0008;msp_0010;msp_0011;msp_0012;msp_0016;msp_0019;msp_0022;msp_0023;msp_0024;msp_0026;msp_0027;msp_0028;msp_0031;msp_0033;msp_0036;msp_0037;msp_0043;msp_0044;msp_0054;msp_0061;msp_0063;msp_0066;msp_0073;msp_0079;msp_0083;msp_0084;msp_0098;msp_0101;msp_0102;msp_0111;msp_0114;msp_0115c;msp_0116;msp_0120;msp_0132;msp_0139;msp_0153;msp_0155;msp_0156;msp_0159;msp_0167c;msp_0171;msp_0183;m…	Bacteroides cellulosilyticus;Bacteroides intestinalis;Bacteroides fragilis 1;Bacteroides thetaiotaomicron;Parabacteroides distasonis;Bacteroides plebeius;Bacteroides faecis;Bacteroides finegoldii;Bacteroides caccae;Hungatella effluvii;Paraprevotella clara;Parabacteroides merdae;Parabacteroides goldsteinii;Bacteroides stercoris;Bacteroides fragilis 2;Bacteroides eggerthii;Bacteroides salyersiae;Ba…	-	-	-	Lyase_8;Lyase_8_C;Lyase_8_N	-	cazy.PL8	-	-	-	-	Lyase_8;Lyase_8_C;Lyase_8_N;cazy.PL8
CL-497	3	138	Yes	No	msp_0003;msp_0007;msp_0008;msp_0010;msp_0014;msp_0015;msp_0022;msp_0024;msp_0028;msp_0031;msp_0033;msp_0036;msp_0038;msp_0039;msp_0042;msp_0043;msp_0044;msp_0046;msp_0051;msp_0054;msp_0059;msp_0060;msp_0063;msp_0064;msp_0074;msp_0078;msp_0084;msp_0096;msp_0097;msp_0116;msp_0118;msp_0120;msp_0127;msp_0131;msp_0133;msp_0134;msp_0156;msp_0159;msp_0167c;msp_0168;msp_0172;msp_0178;msp_0179;msp_0199;ms…	Bacteroides cellulosilyticus;Bacteroides ovatus;Bacteroides intestinalis;Bacteroides fragilis 1;Eisenbergiella tayi;Roseburia faecis;Bacteroides finegoldii;Hungatella effluvii;Parabacteroides goldsteinii;Bacteroides stercoris;Bacteroides fragilis 2;Bacteroides eggerthii;unclassified Lentisphaeria;Lachnospiraceae bacterium hRUG904 / Clostridiales bacterium RUG495 / [Clostridium] sp. CAG:127;Coproc…	-	-	-	CelD_N;Glyco_hydro_9	-	cazy.GH9	-	-	-	-	CelD_N;Glyco_hydro_9;cazy.GH9
CL-565	3	137	Yes	No	msp_0003;msp_0005;msp_0007;msp_0008;msp_0010;msp_0011;msp_0012;msp_0014;msp_0016;msp_0018;msp_0019;msp_0021;msp_0024;msp_0025;msp_0028;msp_0030;msp_0032;msp_0033;msp_0036;msp_0037;msp_0038;msp_0043;msp_0054;msp_0062;msp_0070;msp_0073;msp_0083;msp_0085;msp_0088;msp_0090;msp_0096;msp_0098;msp_0101;msp_0108;msp_0109;msp_0110;msp_0114;msp_0115c;msp_0118;msp_0125;msp_0128;msp_0140;msp_0143;msp_0148c;m…	Bacteroides cellulosilyticus;Escherichia coli;Bacteroides ovatus;Bacteroides intestinalis;Bacteroides fragilis 1;Bacteroides thetaiotaomicron;Parabacteroides distasonis;Eisenbergiella tayi;Bacteroides plebeius;Eisenbergiella massiliensis;Bacteroides faecis;Bacteroides xylanisolvens;Hungatella effluvii;Akkermansia muciniphila;Parabacteroides goldsteinii;Klebsiella pneumoniae;Alistipes onderdonkii;…	-	-	K03781	Catalase;Catalase-rel	-	-	-	-	-	-	Catalase;Catalase-rel;K03781
CL-508	3	133	Yes	No	msp_0034;msp_0055;msp_0060;msp_0075;msp_0093;msp_0106;msp_0144;msp_0168;msp_0173;msp_0175;msp_0194;msp_0207;msp_0218;msp_0234;msp_0243;msp_0247;msp_0273;msp_0276;msp_0291;msp_0298;msp_0303;msp_0311;msp_0314;msp_0317;msp_0319;msp_0321;msp_0330;msp_0332;msp_0346;msp_0348;msp_0354;msp_0364;msp_0372;msp_0373;msp_0374;msp_0376;msp_0398;msp_0401;msp_0407;msp_0418;msp_0420;msp_0421;msp_0424;msp_0442;msp…	[Faecalibacterium] sp. CAG:74;Firmicutes bacterium CAG:65 / [Clostridium] sp. 2789STDY5608883;Lachnospiraceae bacterium CIM:MAG 844 / Firmicutes bacterium CAG:95;Lachnospiraceae bacterium GAM79 / [Clostridium] sp. CAG:91 & sp. 2789STDY5834873;[Clostridium] sp. CAG:62;Clostridiales bacterium UBA7273 / Firmicutes bacterium CAG:240;[Clostridium] sp. CAG:138;Firmicutes bacterium CAG:194;Christensenel…	-	-	K00728	PMT_4TMC	-	cazy.GT39	-	-	-	-	K00728;PMT_4TMC;cazy.GT39
CL-587	3	132	Yes	No	msp_0005;msp_0009;msp_0014;msp_0017;msp_0024;msp_0030;msp_0032;msp_0044;msp_0049;msp_0056;msp_0065;msp_0082c;msp_0085;msp_0089;msp_0090;msp_0100;msp_0107;msp_0108;msp_0109;msp_0110;msp_0112;msp_0113;msp_0119;msp_0131;msp_0132;msp_0134;msp_0140;msp_0141;msp_0148c;msp_0157;msp_0167c;msp_0174;msp_0181;msp_0195;msp_0200;msp_0209;msp_0225;msp_0228;msp_0230;msp_0241;msp_0244;msp_0278;msp_0287;msp_0295;…	Escherichia coli;[Clostridium] bolteae;Eisenbergiella tayi;Roseburia intestinalis;Hungatella effluvii;Klebsiella pneumoniae;Alistipes onderdonkii;Hungatella hathewayi 1;unclassified Lachnoclostridium;unclassified Lachnoclostridium;[Ruminococcus] sp. CAG:17 / Blautia sp. 2789STDY5608880;Providencia rettgeri 2;unclassified Eisenbergiella;Alistipes finegoldii;Alistipes putredinis;Morganella morganii…	-	-	K03186;K03182	UbiD	-	-	-	-	-	-	K03186;UbiD;K03182
CL-59	3	129	Yes	No	msp_0003;msp_0007;msp_0008;msp_0010;msp_0011;msp_0019;msp_0021;msp_0022;msp_0023;msp_0026;msp_0033;msp_0037;msp_0041;msp_0043;msp_0046;msp_0054;msp_0059;msp_0061;msp_0062;msp_0064;msp_0078;msp_0080;msp_0081;msp_0084;msp_0088;msp_0091;msp_0096;msp_0097;msp_0101;msp_0117;msp_0118;msp_0122;msp_0128;msp_0136;msp_0137;msp_0139;msp_0151;msp_0190;msp_0191;msp_0196;msp_0198;msp_0216;msp_0219;msp_0224;msp…	Bacteroides cellulosilyticus;Bacteroides ovatus;Bacteroides intestinalis;Bacteroides fragilis 1;Bacteroides thetaiotaomicron;Bacteroides faecis;Bacteroides xylanisolvens;Bacteroides finegoldii;Bacteroides caccae;Paraprevotella clara;Bacteroides fragilis 2;Bacteroides salyersiae;Prevotella copri 1;Bacteroides coprocola;Bacteroides uniformis;Bacteroides nordii;Barnesiella intestinihominis;Bacteroid…	-	-	-	DUF5117;DUF5118;DUF4953	-	-	-	-	-	-	DUF5117;DUF5118;DUF4953
CL-557	3	129	Yes	No	msp_0001;msp_0002;msp_0006;msp_0009;msp_0014;msp_0018;msp_0029;msp_0030;msp_0034;msp_0060;msp_0085;msp_0106;msp_0110;msp_0112;msp_0115c;msp_0124;msp_0145;msp_0158;msp_0161;msp_0164;msp_0174;msp_0195;msp_0202;msp_0204;msp_0205;msp_0213;msp_0221;msp_0227;msp_0242;msp_0258;msp_0265;msp_0269;msp_0295;msp_0298;msp_0301;msp_0309;msp_0311;msp_0312;msp_0314;msp_0315;msp_0340;msp_0342;msp_0343;msp_0345;ms…	Blastocystis sp. subtype 3;Blastocystis sp. subtype 1;Blastocystis sp. subtype 4;[Clostridium] bolteae;Eisenbergiella tayi;Eisenbergiella massiliensis;[Eubacterium] eligens;Klebsiella pneumoniae;[Faecalibacterium] sp. CAG:74;Lachnospiraceae bacterium CIM:MAG 844 / Firmicutes bacterium CAG:95;unclassified Eisenbergiella;Clostridiales bacterium UBA7273 / Firmicutes bacterium CAG:240;Bilophila wadsw…	M00173:Reductive citrate cycle (Arnon-Buchanan cycle) ;M00620:Incomplete reductive citrate cycle, acetyl-CoA => oxoglutarate ;M00009:Citrate cycle (TCA cycle, Krebs cycle) ;M00011:Citrate cycle, second carbon oxidation, 2-oxoglutarate => oxaloacetate	Carbon fixation;Central carbohydrate metabolism	K11529	DUF4147;MOFRL	-	-	-	-	-	-	DUF4147;MOFRL;K11529
CL-608	3	127	Yes	No	msp_0009;msp_0013;msp_0015;msp_0024;msp_0049;msp_0050;msp_0056;msp_0065;msp_0106;msp_0112;msp_0119;msp_0127;msp_0129;msp_0131;msp_0141;msp_0152;msp_0165;msp_0172;msp_0189;msp_0197;msp_0203;msp_0212;msp_0213;msp_0215;msp_0237;msp_0241;msp_0245;msp_0259;msp_0266;msp_0272;msp_0280;msp_0299;msp_0307;msp_0329;msp_0337;msp_0341;msp_0358;msp_0359;msp_0364;msp_0366;msp_0371;msp_0383;msp_0406;msp_0409;msp…	[Clostridium] bolteae;Ruminococcus bicirculans;Roseburia faecis;Hungatella effluvii;unclassified Lachnoclostridium;Anaerobutyricum hallii;unclassified Lachnoclostridium;[Ruminococcus] sp. CAG:17 / Blautia sp. 2789STDY5608880;Clostridiales bacterium UBA7273 / Firmicutes bacterium CAG:240;Blautia hydrogenotrophica;unclassified Acidaminococcaceae;Ruminococcus sp. CAG:353 & sp. 2789STDY5834938;[Clost…	M00590:Erythritol transport system	Saccharide, polyol, and lipid transport system	K02588;K02587	Oxidored_nitro	-	-	-	-	-	-	K02588;Oxidored_nitro;K02587
CL-301	17	126	Yes	No	msp_0146c;msp_0380;msp_0403;msp_0486;msp_0497;msp_0512;msp_0602c;msp_0742;msp_0779;msp_0832;msp_0890c;msp_0983;msp_1047;msp_1113c;msp_1141;msp_1162;msp_1170;msp_1201;msp_1214;msp_1285;msp_1290;msp_1304;msp_1313;msp_1328;msp_1341;msp_1477;msp_1543;msp_2048;msp_0748;msp_0818;msp_0853c;msp_0985;msp_1042;msp_1043;msp_1049;msp_1066;msp_1068;msp_1103;msp_1110;msp_1112;msp_1157;msp_1180;msp_1187;msp_119…	Streptococcus sanguinis;Streptococcus salivarius;Enterococcus faecium;Lactococcus lactis subsp. lactis;Enterococcus faecalis;[Firmicutes] bacterium CAG:321;Streptococcus infantis 2;Streptococcus parasanguinis;[Clostridium] sp. CAG:417;Streptococcus pasteurianus;Leuconostoc mesenteroides;Streptococcus lutetiensis;unclassified_RF39_Mollicutes;[Firmicutes] bacterium CAG:822;[Mycoplasma] sp. CAG:877;…	M00183:RNA polymerase, bacteria	RNA polymerase	K11144;K03346;K06286;K06948;K00564;K02086;K07586;K03471;K03048;K07570;K07177;K02236	DUF1027;DUF3378;EzrA;UPF0154;DUF402	-	-	-	-	-	-	K11144;K03346;K06286;K06948;K00564;K02086;K07586;K03471;K03048;K07570;K07177;DUF1027;DUF3378;EzrA;UPF0154;DUF402;K02236
CL-551	6	125	Yes	No	msp_0005;msp_0009;msp_0020;msp_0030;msp_0049;msp_0052;msp_0082c;msp_0086;msp_0100;msp_0109;msp_0110;msp_0111;msp_0129;msp_0140;msp_0157;msp_0167c;msp_0173;msp_0174;msp_0186;msp_0193;msp_0195;msp_0197;msp_0203;msp_0209;msp_0226;msp_0228;msp_0232;msp_0234;msp_0245;msp_0246;msp_0259;msp_0274;msp_0295;msp_0307;msp_0308;msp_0341;msp_0357;msp_0369;msp_0379;msp_0398;msp_0422;msp_0462;msp_0472;msp_0494;m…	Escherichia coli;[Clostridium] bolteae;[Clostridium] clostridioforme 1;Klebsiella pneumoniae;unclassified Lachnoclostridium;Blautia sp. CAG:257;Providencia rettgeri 2;[Clostridium] symbiosum;Morganella morganii;[Clostridium] scindens 2;Bilophila wadsworthia;Faecalimonas umbilicata;[Clostridium] sp. CAG:58;Klebsiella oxytoca;Klebsiella aerogenes;Plesiomonas shigelloides;Christensenellaceae bacteri…	M00173:Reductive citrate cycle (Arnon-Buchanan cycle) ;M00374:Dicarboxylate-hydroxybutyrate cycle ;M00620:Incomplete reductive citrate cycle, acetyl-CoA => oxoglutarate ;M00009:Citrate cycle (TCA cycle, Krebs cycle) ;M00011:Citrate cycle, second carbon oxidation, 2-oxoglutarate => oxaloacetate	Carbon fixation;Central carbohydrate metabolism	K01042;K03833	Se-cys_synth_N;SelA;SelB-wing_2;SelB-wing_3	-	-	-	-	-	-	K01042;Se-cys_synth_N;SelA;SelB-wing_2;SelB-wing_3;K03833
CL-645	4	124	Yes	No	msp_0049;msp_0060;msp_0086;msp_0104;msp_0105;msp_0106;msp_0109;msp_0113;msp_0180;msp_0205;msp_0221;msp_0234;msp_0237;msp_0240;msp_0249;msp_0271;msp_0273;msp_0279;msp_0282;msp_0288;msp_0295;msp_0306;msp_0311;msp_0312;msp_0315;msp_0317;msp_0319;msp_0322;msp_0343;msp_0344;msp_0364;msp_0392;msp_0398;msp_0418;msp_0442;msp_0452;msp_0461;msp_0487;msp_0488;msp_0491;msp_0494;msp_0498;msp_0513;msp_0534;msp…	unclassified Lachnoclostridium;Lachnospiraceae bacterium CIM:MAG 844 / Firmicutes bacterium CAG:95;[Clostridium] symbiosum;Emergencia timonensis;Ruminococcus sp. CAG:177;Clostridiales bacterium UBA7273 / Firmicutes bacterium CAG:240;[Clostridium] scindens 2;Blautia producta 2;Blautia coccoides == Blautia producta;Firmicutes bacterium CAG:124;Acidaminococcus intestini;Catabacter sp. UBA1685 / Clos…	-	-	K09128;K09123	DUF126;DUF521	-	-	-	-	-	-	K09128;DUF126;DUF521;K09123
CL-593	3	124	Yes	No	msp_0005;msp_0009;msp_0014;msp_0018;msp_0020;msp_0024;msp_0030;msp_0034;msp_0044;msp_0052;msp_0055;msp_0056;msp_0065;msp_0066;msp_0071;msp_0074;msp_0076;msp_0077;msp_0079;msp_0085;msp_0086;msp_0108;msp_0110;msp_0127;msp_0129;msp_0135;msp_0140;msp_0141;msp_0154;msp_0157;msp_0163;msp_0168;msp_0171;msp_0177;msp_0181;msp_0182;msp_0185;msp_0186;msp_0209;msp_0228;msp_0233;msp_0253;msp_0254;msp_0259;msp…	Escherichia coli;[Clostridium] bolteae;Eisenbergiella tayi;Eisenbergiella massiliensis;[Clostridium] clostridioforme 1;Hungatella effluvii;Klebsiella pneumoniae;[Faecalibacterium] sp. CAG:74;Hungatella hathewayi 1;Blautia sp. CAG:257;Firmicutes bacterium CAG:65 / [Clostridium] sp. 2789STDY5608883;unclassified Lachnoclostridium;[Ruminococcus] sp. CAG:17 / Blautia sp. 2789STDY5608880;[Clostridium] …	-	-	K05814;K05815;K05813	-	-	-	-	-	-	-	K05814;K05815;K05813
CL-287	4	123	Yes	No	msp_0005;msp_0030;msp_0082c;msp_0092;msp_0100;msp_0108;msp_0119;msp_0140;msp_0145;msp_0148c;msp_0157;msp_0167c;msp_0197;msp_0202;msp_0209;msp_0228;msp_0239;msp_0245;msp_0280;msp_0288;msp_0313;msp_0359;msp_0366;msp_0368c;msp_0386;msp_0406;msp_0414;msp_0466;msp_0474;msp_0482;msp_0483;msp_0501;msp_0603c;msp_0617;msp_0618;msp_0626;msp_0675;msp_0700;msp_0724;msp_0741;msp_0749;msp_0768;msp_0801;msp_084…	Escherichia coli;Klebsiella pneumoniae;Providencia rettgeri 2;Sutterella wadsworthensis 1;Morganella morganii;Enterobacter hormaechei;unclassified Acidaminococcaceae;Klebsiella oxytoca;Parasutterella excrementihominis;Veillonella infantium;Klebsiella aerogenes;Plesiomonas shigelloides;Megasphaera sp. BL7 & NM10;[Acinetobacter] sp. N54.MGS-139 / Proteobacteria bacterium CAG:139;Enterobacter roggen…	M00060:Lipopolysaccharide biosynthesis, KDO2-lipid A ;M00064:ADP-L-glycero-D-manno-heptose biosynthesis ;M00080:Lipopolysaccharide biosynthesis, inner core => outer core => O-antigen	Lipopolysaccharide metabolism	K02841;K03274;K09774;K02535	-	-	-	-	-	-	-	K02841;K03274;K09774;K02535
CL-589	4	123	Yes	No	msp_0047;msp_0050;msp_0073;msp_0092;msp_0099;msp_0120;msp_0130;msp_0147;msp_0159;msp_0177;msp_0185;msp_0221;msp_0262;msp_0270;msp_0282;msp_0312;msp_0325;msp_0343;msp_0344;msp_0372;msp_0391;msp_0427;msp_0444;msp_0447;msp_0466;msp_0467;msp_0481;msp_0488;msp_0500;msp_0518;msp_0521;msp_0556;msp_0562;msp_0597;msp_0603c;msp_0606;msp_0649;msp_0657;msp_0662;msp_0673;msp_0676;msp_0691;msp_0696;msp_0703;ms…	[Eubacterium] sp. CAG:115;Anaerobutyricum hallii;Victivallales bacterium CCUG 44730;Sutterella wadsworthensis 1;Lentisphaeria bacterium UBA1829;unclassified Victivallales;Candidatus Gastranaerophilales bacterium x14;unclassified Ruminococcaceae;Victivallis vadensis;unclassified Lachnoclostridium;unclassified Lachnospiraceae;Acidaminococcus intestini;Ruminococcus callidus;unclassified Clostridiale…	M00209:Osmoprotectant transport system	Mineral and organic ion transport system	K03724	DUF2791;TerB_C;TerB_N	-	-	-	-	-	-	DUF2791;TerB_C;TerB_N;K03724
CL-563	3	122	Yes	No	msp_0003;msp_0005;msp_0007;msp_0008;msp_0010;msp_0011;msp_0019;msp_0021;msp_0022;msp_0023;msp_0026;msp_0030;msp_0031;msp_0033;msp_0036;msp_0037;msp_0046;msp_0054;msp_0059;msp_0061;msp_0063;msp_0082c;msp_0097;msp_0103;msp_0108;msp_0119;msp_0136;msp_0138;msp_0139;msp_0140;msp_0148c;msp_0157;msp_0166;msp_0167c;msp_0174;msp_0203;msp_0209;msp_0217;msp_0219;msp_0221;msp_0228;msp_0235;msp_0257;msp_0260;…	Bacteroides cellulosilyticus;Escherichia coli;Bacteroides ovatus;Bacteroides intestinalis;Bacteroides fragilis 1;Bacteroides thetaiotaomicron;Bacteroides faecis;Bacteroides xylanisolvens;Bacteroides finegoldii;Bacteroides caccae;Paraprevotella clara;Klebsiella pneumoniae;Bacteroides stercoris;Bacteroides fragilis 2;Bacteroides eggerthii;Bacteroides salyersiae;Bacteroides uniformis;Bacteroides nor…	-	-	K02069;K02068	UPF0014	-	-	-	-	-	-	K02069;UPF0014;K02068
CL-504	3	117	Yes	No	msp_0003;msp_0007;msp_0008;msp_0009;msp_0011;msp_0015;msp_0016;msp_0019;msp_0021;msp_0022;msp_0026;msp_0029;msp_0031;msp_0032;msp_0035;msp_0036;msp_0037;msp_0041;msp_0043;msp_0046;msp_0061;msp_0062;msp_0067;msp_0068;msp_0069;msp_0074;msp_0078;msp_0091;msp_0097;msp_0098;msp_0105;msp_0133;msp_0137;msp_0138;msp_0142;msp_0151;msp_0152;msp_0153;msp_0156;msp_0160;msp_0161;msp_0164;msp_0168;msp_0187;msp…	Bacteroides cellulosilyticus;Bacteroides ovatus;Bacteroides intestinalis;[Clostridium] bolteae;Bacteroides thetaiotaomicron;Roseburia faecis;Bacteroides plebeius;Bacteroides faecis;Bacteroides xylanisolvens;Bacteroides finegoldii;Paraprevotella clara;[Eubacterium] eligens;Bacteroides stercoris;Alistipes onderdonkii;Bacteroides dorei;Bacteroides eggerthii;Bacteroides salyersiae;Prevotella copri 1;…	-	-	K00771	Branch	-	cazy.GT14	-	-	-	-	K00771;Branch;cazy.GT14
CL-398	3	115	Yes	No	msp_0003;msp_0005;msp_0007;msp_0008;msp_0010;msp_0011;msp_0012;msp_0019;msp_0021;msp_0022;msp_0023;msp_0026;msp_0027;msp_0028;msp_0030;msp_0032;msp_0033;msp_0035;msp_0036;msp_0037;msp_0040;msp_0054;msp_0059;msp_0061;msp_0062;msp_0067;msp_0069;msp_0082c;msp_0083;msp_0089;msp_0097;msp_0098;msp_0100;msp_0102;msp_0108;msp_0114;msp_0118;msp_0122;msp_0139;msp_0140;msp_0143;msp_0149;msp_0155;msp_0156;ms…	Bacteroides cellulosilyticus;Escherichia coli;Bacteroides ovatus;Bacteroides intestinalis;Bacteroides fragilis 1;Bacteroides thetaiotaomicron;Parabacteroides distasonis;Bacteroides faecis;Bacteroides xylanisolvens;Bacteroides finegoldii;Bacteroides caccae;Paraprevotella clara;Parabacteroides merdae;Parabacteroides goldsteinii;Klebsiella pneumoniae;Alistipes onderdonkii;Bacteroides fragilis 2;Bact…	-	-	K07148;K01070	DUF418	-	-	-	-	-	-	K07148;K01070;DUF418
CL-528	3	115	Yes	No	msp_0013;msp_0047;msp_0053;msp_0106;msp_0119;msp_0121;msp_0127;msp_0131;msp_0134;msp_0178;msp_0192;msp_0203;msp_0210;msp_0212;msp_0215;msp_0221;msp_0240;msp_0252;msp_0262;msp_0269;msp_0270;msp_0286;msp_0297;msp_0303;msp_0306;msp_0311;msp_0312;msp_0317;msp_0319;msp_0325;msp_0352;msp_0356;msp_0357;msp_0359;msp_0361;msp_0367;msp_0383;msp_0384;msp_0393;msp_0405;msp_0413;msp_0420;msp_0426;msp_0427;msp…	Ruminococcus bicirculans;[Eubacterium] sp. CAG:115;[Eubacterium] siraeum;Clostridiales bacterium UBA7273 / Firmicutes bacterium CAG:240;unclassified Acidaminococcaceae;Oscillibacter sp. CAG:241_62_21;Ruminococcus sp. CAG:353 & sp. 2789STDY5834938;Phascolarctobacterium faecium;Megamonas funiformis == rupellensis;Ruminococcus sp. A254.MGS-254 & CAG:254;unclassified Oscillospiraceae;Negativibacillus…	M00001:Glycolysis (Embden-Meyerhof pathway), glucose => pyruvate ;M00549:Nucleotide sugar biosynthesis, glucose => UDP-glucose	Central carbohydrate metabolism;Other carbohydrate metabolism	K03666	Hfq	lmo1295	-	-	-	-	RNA-binding protein Hfq	K03666;Hfq;lmo1295
CL-235	4	113	Yes	No	msp_0003;msp_0005;msp_0007;msp_0008;msp_0010;msp_0011;msp_0012;msp_0016;msp_0019;msp_0021;msp_0023;msp_0028;msp_0033;msp_0043;msp_0046;msp_0054;msp_0061;msp_0082c;msp_0088;msp_0092;msp_0096;msp_0098;msp_0102;msp_0110;msp_0145;msp_0155;msp_0156;msp_0167c;msp_0184;msp_0195;msp_0202;msp_0226;msp_0235;msp_0239;msp_0253;msp_0267;msp_0280;msp_0288;msp_0295;msp_0316;msp_0324;msp_0359;msp_0368c;msp_0369;…	Bacteroides cellulosilyticus;Escherichia coli;Bacteroides ovatus;Bacteroides intestinalis;Bacteroides fragilis 1;Bacteroides thetaiotaomicron;Parabacteroides distasonis;Bacteroides plebeius;Bacteroides faecis;Bacteroides xylanisolvens;Bacteroides caccae;Parabacteroides goldsteinii;Bacteroides fragilis 2;Bacteroides coprocola;Bacteroides uniformis;Bacteroides nordii;Bacteroides congonensis;Provide…	M00530:Dissimilatory nitrate reduction, nitrate => ammonia	Nitrogen metabolism	K03385	Cytochrom_C552;Cytochrom_NNT;Cytochrome_C7	-	-	-	-	-	-	Cytochrom_C552;Cytochrom_NNT;Cytochrome_C7;K03385
CL-447	6	110	Yes	No	msp_0003;msp_0005;msp_0007;msp_0010;msp_0012;msp_0025;msp_0028;msp_0033;msp_0035;msp_0037;msp_0040;msp_0041;msp_0046;msp_0061;msp_0069;msp_0080;msp_0083;msp_0093;msp_0098;msp_0123;msp_0134;msp_0155;msp_0156;msp_0176;msp_0198;msp_0201;msp_0216;msp_0219;msp_0264;msp_0266;msp_0275;msp_0289;msp_0316;msp_0338;msp_0438;msp_0439;msp_0460;msp_0468;msp_0490;msp_0580;msp_0590;msp_0687;msp_0715c;msp_0735;ms…	Bacteroides cellulosilyticus;Escherichia coli;Bacteroides ovatus;Bacteroides fragilis 1;Parabacteroides distasonis;Akkermansia muciniphila;Parabacteroides goldsteinii;Bacteroides fragilis 2;Bacteroides dorei;Bacteroides salyersiae;Bacteroides massiliensis;Prevotella copri 1;Bacteroides uniformis;Bacteroides congonensis;Bacteroides vulgatus;Prevotellamassilia timonensis;Parabacteroides johnsonii;[…	-	-	-	Kelch_2;Kelch_3;Kelch_4;Kelch_5;Kelch_6;Kelch_1	-	-	-	-	-	-	Kelch_2;Kelch_3;Kelch_4;Kelch_5;Kelch_6;Kelch_1
CL-378	3	110	Yes	No	msp_0003;msp_0007;msp_0008;msp_0011;msp_0012;msp_0016;msp_0019;msp_0021;msp_0022;msp_0023;msp_0027;msp_0028;msp_0031;msp_0032;msp_0035;msp_0036;msp_0037;msp_0043;msp_0054;msp_0061;msp_0063;msp_0067;msp_0069;msp_0078;msp_0083;msp_0084;msp_0089;msp_0091;msp_0096;msp_0098;msp_0102;msp_0118;msp_0122;msp_0137;msp_0143;msp_0149;msp_0155;msp_0156;msp_0176;msp_0187;msp_0198;msp_0217;msp_0219;msp_0224;msp…	Bacteroides cellulosilyticus;Bacteroides ovatus;Bacteroides intestinalis;Bacteroides thetaiotaomicron;Parabacteroides distasonis;Bacteroides plebeius;Bacteroides faecis;Bacteroides xylanisolvens;Bacteroides finegoldii;Bacteroides caccae;Parabacteroides merdae;Parabacteroides goldsteinii;Bacteroides stercoris;Alistipes onderdonkii;Bacteroides dorei;Bacteroides eggerthii;Bacteroides salyersiae;Bact…	-	-	K02856	RhaT	-	cazy.GH106	-	-	-	-	K02856;RhaT;cazy.GH106
CL-158	3	109	Yes	No	msp_0005;msp_0009;msp_0012;msp_0020;msp_0030;msp_0062;msp_0066;msp_0079;msp_0082c;msp_0092;msp_0098;msp_0100;msp_0103;msp_0108;msp_0140;msp_0148c;msp_0157;msp_0174;msp_0184;msp_0197;msp_0202;msp_0209;msp_0213;msp_0215;msp_0216;msp_0218;msp_0228;msp_0231;msp_0239;msp_0278;msp_0313;msp_0341;msp_0360;msp_0364;msp_0366;msp_0383;msp_0406;msp_0408;msp_0424;msp_0437c;msp_0443;msp_0452;msp_0466;msp_0474;…	Escherichia coli;[Clostridium] bolteae;Parabacteroides distasonis;[Clostridium] clostridioforme 1;Klebsiella pneumoniae;Odoribacter splanchnicus;[Clostridium] sp. AT4;[Clostridium] sp. CAG:7;Providencia rettgeri 2;Sutterella wadsworthensis 1;Parabacteroides gordonii;Morganella morganii;[Clostridium] innocuum;Enterobacter hormaechei;Klebsiella oxytoca;Veillonella infantium;Klebsiella aerogenes;Kle…	M00064:ADP-L-glycero-D-manno-heptose biosynthesis	Lipopolysaccharide metabolism	K01744;K01679	FumaraseC_C	-	-	-	-	-	-	FumaraseC_C;K01744;K01679
CL-197	3	109	Yes	No	msp_0003;msp_0005;msp_0007;msp_0008;msp_0010;msp_0011;msp_0012;msp_0019;msp_0021;msp_0022;msp_0023;msp_0027;msp_0028;msp_0030;msp_0032;msp_0033;msp_0037;msp_0054;msp_0061;msp_0062;msp_0064;msp_0082c;msp_0083;msp_0088;msp_0089;msp_0092;msp_0098;msp_0100;msp_0108;msp_0110;msp_0117;msp_0122;msp_0128;msp_0140;msp_0143;msp_0151;msp_0156;msp_0157;msp_0176;msp_0184;msp_0191;msp_0196;msp_0209;msp_0216;ms…	Bacteroides cellulosilyticus;Escherichia coli;Bacteroides ovatus;Bacteroides intestinalis;Bacteroides fragilis 1;Bacteroides thetaiotaomicron;Parabacteroides distasonis;Bacteroides faecis;Bacteroides xylanisolvens;Bacteroides finegoldii;Bacteroides caccae;Parabacteroides merdae;Parabacteroides goldsteinii;Klebsiella pneumoniae;Alistipes onderdonkii;Bacteroides fragilis 2;Bacteroides salyersiae;Ba…	-	-	K05367	A2M_BRD;BiPBP_C	-	-	-	-	-	-	A2M_BRD;BiPBP_C;K05367
CL-440	7	105	Yes	No	msp_0049;msp_0052;msp_0086;msp_0105;msp_0109;msp_0124;msp_0129;msp_0168;msp_0173;msp_0186;msp_0221;msp_0232;msp_0247;msp_0271;msp_0277;msp_0285;msp_0308;msp_0322;msp_0323;msp_0329;msp_0330;msp_0342;msp_0343;msp_0346;msp_0374;msp_0385;msp_0407;msp_0408;msp_0409;msp_0456;msp_0488;msp_0499;msp_0506;msp_0545;msp_0556;msp_0560;msp_0569;msp_0573;msp_0592;msp_0604;msp_0622;msp_0649;msp_0652;msp_0696;msp…	unclassified Lachnoclostridium;Blautia sp. CAG:257;[Clostridium] symbiosum;Ruminococcus sp. CAG:177;[Clostridium] scindens 2;Candidatus Cibiobacter qucibialis;[Clostridium] sp. CAG:58;Firmicutes bacterium CAG:194;Christensenellaceae bacterium Phil1 & [Clostridium] sp. CAG:226;[Clostridium] sp. CAG:299;Acidaminococcus intestini;Dorea sp. CAG:317;[Clostridium] sp. 44_14 & CAG:277;[Eubacterium] sp. …	-	-	K07160;K06350;K06351	CT_A_B;CT_C_D;DUF1445;LamB_YcsF	-	-	-	-	-	-	K07160;K06350;CT_A_B;CT_C_D;DUF1445;LamB_YcsF;K06351
CL-238	3	105	Yes	No	msp_0003;msp_0007;msp_0008;msp_0009;msp_0011;msp_0014;msp_0018;msp_0019;msp_0020;msp_0021;msp_0022;msp_0023;msp_0024;msp_0028;msp_0031;msp_0035;msp_0036;msp_0037;msp_0038;msp_0044;msp_0046;msp_0049;msp_0054;msp_0056;msp_0061;msp_0063;msp_0066;msp_0071;msp_0073;msp_0091;msp_0099;msp_0111;msp_0112;msp_0118;msp_0135;msp_0149;msp_0159;msp_0170;msp_0171;msp_0187;msp_0190;msp_0196;msp_0198;msp_0211;msp…	Bacteroides cellulosilyticus;Bacteroides ovatus;Bacteroides intestinalis;[Clostridium] bolteae;Bacteroides thetaiotaomicron;Eisenbergiella tayi;Eisenbergiella massiliensis;Bacteroides faecis;[Clostridium] clostridioforme 1;Bacteroides xylanisolvens;Bacteroides finegoldii;Bacteroides caccae;Hungatella effluvii;Parabacteroides goldsteinii;Bacteroides stercoris;Bacteroides dorei;Bacteroides eggerthi…	-	-	K19052	Hepar_II_III_N	-	cazy.PL12	-	-	-	-	K19052;Hepar_II_III_N;cazy.PL12
CL-618	3	103	Yes	No	msp_0009;msp_0014;msp_0018;msp_0042;msp_0056;msp_0060;msp_0062;msp_0086;msp_0104;msp_0110;msp_0117;msp_0128;msp_0135;msp_0180;msp_0184;msp_0191;msp_0192;msp_0197;msp_0200;msp_0213;msp_0221;msp_0240;msp_0245;msp_0266;msp_0292;msp_0315;msp_0331;msp_0366;msp_0373;msp_0391;msp_0392;msp_0406;msp_0425;msp_0435;msp_0440;msp_0442;msp_0450;msp_0463;msp_0464;msp_0490;msp_0509;msp_0534;msp_0541;msp_0550;msp…	[Clostridium] bolteae;Eisenbergiella tayi;Eisenbergiella massiliensis;Coprococcus eutactus 2;unclassified Lachnoclostridium;Lachnospiraceae bacterium CIM:MAG 844 / Firmicutes bacterium CAG:95;Odoribacter splanchnicus;[Clostridium] symbiosum;Emergencia timonensis;Bilophila wadsworthia;Butyricimonas sp. Marseille-P4593;Butyricimonas virosa;[Clostridium] clostridioforme 2;Blautia coccoides == Blauti…	M00216:Multiple sugar transport system	Saccharide, polyol, and lipid transport system	K14534	HpaB;HpaB_N	-	-	-	-	-	-	HpaB;HpaB_N;K14534
CL-214	7	102	Yes	No	msp_0005;msp_0030;msp_0082c;msp_0092;msp_0100;msp_0108;msp_0110;msp_0157;msp_0167c;msp_0170;msp_0195;msp_0202;msp_0209;msp_0220;msp_0226;msp_0228;msp_0239;msp_0280;msp_0288;msp_0295;msp_0368c;msp_0369;msp_0375;msp_0386;msp_0414;msp_0455;msp_0466;msp_0474;msp_0564;msp_0617;msp_0618;msp_0620;msp_0626;msp_0633;msp_0642;msp_0656;msp_0675;msp_0695;msp_0715c;msp_0718;msp_0724;msp_0741;msp_0788;msp_0795…	Escherichia coli;Klebsiella pneumoniae;Providencia rettgeri 2;Sutterella wadsworthensis 1;Morganella morganii;Enterobacter hormaechei;Bilophila wadsworthia;Klebsiella aerogenes;Plesiomonas shigelloides;Azospirillum sp. CAG:239;Desulfovibrio piger;[Acinetobacter] sp. N54.MGS-139 / Proteobacteria bacterium CAG:139;Enterobacter roggenkampii;Azospirillum sp. 51_20;Desulfovibrionaceae bacterium CIM:MA…	M00394:RNA degradosome	RNA processing	K04754;K08300;K03560	MlaA;SurA_N;DSBA;Thioredoxin_4	-	-	-	-	-	-	K04754;K08300;K03560;MlaA;SurA_N;DSBA;Thioredoxin_4
CL-570	3	101	Yes	No	msp_0003;msp_0015;msp_0029;msp_0039;msp_0055;msp_0072;msp_0074;msp_0075;msp_0087;msp_0125;msp_0148c;msp_0152;msp_0169;msp_0194;msp_0206;msp_0221;msp_0260;msp_0273;msp_0313;msp_0321;msp_0330;msp_0359;msp_0371;msp_0373;msp_0378;msp_0380;msp_0383;msp_0397;msp_0408;msp_0446c;msp_0463;msp_0482;msp_0486;msp_0488;msp_0493;msp_0496;msp_0499;msp_0527;msp_0539;msp_0548;msp_0602c;msp_0603c;msp_0630;msp_0662…	Bacteroides cellulosilyticus;Roseburia faecis;[Eubacterium] eligens;Lachnospiraceae bacterium hRUG904 / Clostridiales bacterium RUG495 / [Clostridium] sp. CAG:127;Firmicutes bacterium CAG:65 / [Clostridium] sp. 2789STDY5608883;Roseburia inulinivorans;Roseburia sp. CAG:100 / Lachnospiraceae bacterium CIM:MAG 54;Lachnospiraceae bacterium GAM79 / [Clostridium] sp. CAG:91 & sp. 2789STDY5834873;Lachno…	-	-	K09155	DUF438;PAS_10	-	-	-	-	-	-	DUF438;PAS_10;K09155
CL-25	101	100	Yes	No	msp_0060;msp_0074;msp_0075;msp_0273;msp_0330;msp_0077;msp_0115c;msp_0119;msp_0237;msp_0371;msp_0387;msp_0433;msp_0493;msp_0603c;msp_1819;msp_0017;msp_0039;msp_0055;msp_0057;msp_0168;msp_0194;msp_0206;msp_0243;msp_0294;msp_0305;msp_0321;msp_0376;msp_0582;msp_1613;msp_0015;msp_0029;msp_0071;msp_0072;msp_0207;msp_0227;msp_0247;msp_0373;msp_0463;msp_0496;msp_0499;msp_0533;msp_0548;msp_0863;msp_0068;m…	Lachnospiraceae bacterium CIM:MAG 844 / Firmicutes bacterium CAG:95;Roseburia sp. CAG:100 / Lachnospiraceae bacterium CIM:MAG 54;Lachnospiraceae bacterium GAM79 / [Clostridium] sp. CAG:91 & sp. 2789STDY5834873;[Clostridium] sp. CAG:510;Firmicutes bacterium CAG:534;unclassified Lachnospiraceae;Lachnoclostridium phytofermentans 2;unclassified Acidaminococcaceae;Roseburia sp. CAG:182;unclassified Ro…	M00506:CheA-CheYBV (chemotaxis) two-component regulatory system	Two-component regulatory system	K00575;K02387;K02388;K02389;K02396;K02397;K02398;K02407;K02408;K02410;K02412;K02413;K02414;K02416;K02417;K02418;K02419;K02422;K02556;K03408;K03412;K03563;K02385;K03410;K03411;K03413;K03415;K04061;K09749;K13626;K02404;K06603;K09766;K09770;K02400;K02409;K02390;K02392;K02401;K02405;K02406;K02411;K02415;K02420;K02421;K04562;K03407;K03406	Bac_export_3;CheB_methylest;CheC;CheD;CheR_N;CheW;CheX;CsrA;DUF2225;DUF327;FapA;FlaG;Flagellar_put;FlbD;Flg_hook;FlgD;FlgM;FlgN;FliD_C;FliD_N;FliE;FliG_C;FliG_N;FliJ;FliM;FliO;FliS;FliW;H-kinase_dim;MotB_plug;P2;YcgR_2;YjfB_motility;Flg_bb_rod;Flg_bbr_C;MCPsignal;Bac_export_1;Bac_export_2;CheR;FHIPEP;Flagellin_C;Flagellin_N;FliG_M;FliH;FliMN_C;FliP;YscJ_FliF;YscJ_FliF_C;PilZ;4HB_MCP_1;FliL;Rod-bi…	lmo0691	-	-	-	-	Chemotaxis regulator - transmits chemoreceptor signals to flagellar motor components CheY	K00575;K02387;K02388;K02389;K02396;K02397;K02398;K02407;K02408;K02410;K02412;K02413;K02414;K02416;K02417;K02418;K02419;K02422;K02556;K03408;K03412;K03563;K02385;K03410;K03411;K03413;K03415;K04061;K09749;K13626;K02404;K06603;K09766;K09770;Bac_export_3;CheB_methylest;CheC;CheD;CheR_N;CheW;CheX;CsrA;DUF2225;DUF327;FapA;FlaG;Flagellar_put;FlbD;Flg_hook;FlgD;FlgM;FlgN;FliD_C;FliD_N;FliE;FliG_C;FliG_N;…
CL-499	4	100	Yes	No	msp_0003;msp_0007;msp_0008;msp_0014;msp_0018;msp_0021;msp_0022;msp_0024;msp_0026;msp_0031;msp_0035;msp_0036;msp_0041;msp_0054;msp_0060;msp_0061;msp_0063;msp_0067;msp_0069;msp_0078;msp_0091;msp_0097;msp_0101;msp_0102;msp_0113;msp_0115c;msp_0122;msp_0217;msp_0224;msp_0251;msp_0256;msp_0309;msp_0336;msp_0339;msp_0341;msp_0397;msp_0445;msp_0485;msp_0486;msp_0495;msp_0519;msp_0520c;msp_0568;msp_0593;m…	Bacteroides cellulosilyticus;Bacteroides ovatus;Bacteroides intestinalis;Eisenbergiella tayi;Eisenbergiella massiliensis;Bacteroides xylanisolvens;Bacteroides finegoldii;Hungatella effluvii;Paraprevotella clara;Bacteroides stercoris;Bacteroides dorei;Bacteroides eggerthii;Prevotella copri 1;Bacteroides nordii;Lachnospiraceae bacterium CIM:MAG 844 / Firmicutes bacterium CAG:95;Bacteroides congonen…	-	-	K01235	Glyco_hydro_67C;Glyco_hydro_67M	-	cazy.GH67	-	-	-	-	K01235;Glyco_hydro_67C;Glyco_hydro_67M;cazy.GH67
CL-186	3	100	Yes	No	msp_0005;msp_0009;msp_0015;msp_0020;msp_0024;msp_0030;msp_0038;msp_0048;msp_0049;msp_0052;msp_0056;msp_0079;msp_0082c;msp_0108;msp_0129;msp_0131;msp_0140;msp_0145;msp_0157;msp_0163;msp_0174;msp_0177;msp_0202;msp_0209;msp_0221;msp_0237;msp_0239;msp_0241;msp_0258;msp_0262;msp_0266;msp_0280;msp_0289;msp_0299;msp_0325;msp_0338;msp_0346;msp_0360;msp_0366;msp_0395;msp_0406;msp_0409;msp_0413;msp_0414;ms…	Escherichia coli;[Clostridium] bolteae;Roseburia faecis;[Clostridium] clostridioforme 1;Hungatella effluvii;Klebsiella pneumoniae;unclassified Lentisphaeria;[Eubacterium] sp. CAG:38;unclassified Lachnoclostridium;Blautia sp. CAG:257;unclassified Lachnoclostridium;[Clostridium] sp. CAG:7;Providencia rettgeri 2;Enterobacter hormaechei;[Clostridium] sp. CAG:58;Phascolarctobacterium faecium;Klebsiell…	M00587:Arginine/lysine/histidine/glutamine transport system	Phosphate and amino acid transport system	K15554;K15553;K15555	-	-	-	-	-	-	-	K15554;K15553;K15555
CL-610	3	100	Yes	No	msp_0009;msp_0012;msp_0020;msp_0027;msp_0028;msp_0030;msp_0049;msp_0062;msp_0082c;msp_0098;msp_0100;msp_0108;msp_0130;msp_0139;msp_0140;msp_0143;msp_0156;msp_0157;msp_0167c;msp_0174;msp_0184;msp_0198;msp_0209;msp_0216;msp_0228;msp_0232;msp_0253;msp_0264;msp_0307;msp_0316;msp_0318;msp_0328;msp_0329;msp_0338;msp_0341;msp_0347;msp_0362;msp_0368c;msp_0415;msp_0443;msp_0454;msp_0455;msp_0490;msp_0528;…	[Clostridium] bolteae;Parabacteroides distasonis;[Clostridium] clostridioforme 1;Parabacteroides merdae;Parabacteroides goldsteinii;Klebsiella pneumoniae;unclassified Lachnoclostridium;Odoribacter splanchnicus;Providencia rettgeri 2;Parabacteroides gordonii;Morganella morganii;Enterobacter hormaechei;Candidatus Gastranaerophilales bacterium x14;Coprobacter fastidiosus;Klebsiella oxytoca;Parabacte…	-	-	K03317	Nucleos_tra2_C;Nucleos_tra2_N	-	-	-	-	-	-	Nucleos_tra2_C;Nucleos_tra2_N;K03317
CL-210	5	99	Yes	No	msp_0015;msp_0017;msp_0029;msp_0039;msp_0042;msp_0045;msp_0048;msp_0057;msp_0065;msp_0068;msp_0076;msp_0087;msp_0093;msp_0094;msp_0095;msp_0107;msp_0141;msp_0158;msp_0161;msp_0162;msp_0165;msp_0169;msp_0175;msp_0178;msp_0179;msp_0189;msp_0197;msp_0227;msp_0237;msp_0238;msp_0243;msp_0245;msp_0262;msp_0272;msp_0282;msp_0290;msp_0305;msp_0321;msp_0325;msp_0329;msp_0376;msp_0405;msp_0431;msp_0436;msp…	Roseburia faecis;Roseburia intestinalis;[Eubacterium] eligens;Lachnospiraceae bacterium hRUG904 / Clostridiales bacterium RUG495 / [Clostridium] sp. CAG:127;Coprococcus eutactus 2;Ruminococcus bromii 2;[Eubacterium] sp. CAG:38;Roseburia sp. CAG:45 & sp. 2789STDY5608886;[Ruminococcus] sp. CAG:17 / Blautia sp. 2789STDY5608880;[Eubacterium] rectale;Blautia wexlerae;Lachnospira pectinoschiza;[Clostri…	M00596:Dissimilatory sulfate reduction, sulfate => H2S ;M00185:Sulfate transport system	Sulfur metabolism;Mineral and organic ion transport system	K02046;K02047;K02048;K00395;K02045	-	-	-	-	-	-	-	K02046;K02047;K02048;K00395;K02045
CL-58	3	99	Yes	No	msp_0005;msp_0014;msp_0018;msp_0020;msp_0024;msp_0030;msp_0044;msp_0058;msp_0066;msp_0082c;msp_0103;msp_0107;msp_0108;msp_0119;msp_0121;msp_0126;msp_0134;msp_0138;msp_0140;msp_0146c;msp_0147;msp_0148c;msp_0157;msp_0160;msp_0174;msp_0200;msp_0209;msp_0228;msp_0231;msp_0236;msp_0241;msp_0266;msp_0289;msp_0313;msp_0329;msp_0334;msp_0337;msp_0338;msp_0341;msp_0358;msp_0395;msp_0403;msp_0408;msp_0419;…	Escherichia coli;Eisenbergiella tayi;Eisenbergiella massiliensis;[Clostridium] clostridioforme 1;Hungatella effluvii;Klebsiella pneumoniae;Hungatella hathewayi 1;[Ruminococcus] gnavus;[Clostridium] sp. AT4;Providencia rettgeri 2;[Clostridium] innocuum;Anaerostipes hadrus 1;Enterobacter hormaechei;unclassified Acidaminococcaceae;Oscillibacter sp. CAG:241_62_21;[Ruminococcus] torques;Megamonas funi…	M00550:Ascorbate degradation, ascorbate => D-xylulose-5P ;M00283:PTS system, ascorbate-specific II component	Cofactor and vitamin biosynthesis;Phosphotransferase system (PTS)	K02822;K03475;K02821	-	-	-	-	-	-	-	K02822;K03475;K02821
CL-327	6	98	Yes	No	msp_0005;msp_0012;msp_0025;msp_0027;msp_0028;msp_0059;msp_0070;msp_0083;msp_0092;msp_0098;msp_0110;msp_0134;msp_0139;msp_0145;msp_0148c;msp_0156;msp_0198;msp_0201;msp_0202;msp_0239;msp_0253;msp_0280;msp_0288;msp_0295;msp_0310;msp_0313;msp_0359;msp_0386;msp_0396;msp_0411;msp_0412;msp_0414;msp_0415;msp_0443;msp_0466;msp_0474;msp_0482;msp_0483;msp_0518;msp_0557;msp_0573;msp_0595;msp_0617;msp_0618;ms…	Escherichia coli;Parabacteroides distasonis;Akkermansia muciniphila;Parabacteroides merdae;Parabacteroides goldsteinii;Barnesiella intestinihominis;Akkermansia muciniphila 2;Parabacteroides johnsonii;Sutterella wadsworthensis 1;Parabacteroides gordonii;Bilophila wadsworthia;Megamonas funiformis == rupellensis;Coprobacter fastidiosus;Parasutterella excrementihominis;Veillonella infantium;unclassif…	-	-	K06281;K06282;K03620	HycI;Ni_hydr_CYTB;NiFe_hyd_SSU_C	-	-	-	-	-	-	K06281;K06282;HycI;Ni_hydr_CYTB;NiFe_hyd_SSU_C;K03620
CL-202	3	97	Yes	No	msp_0005;msp_0014;msp_0017;msp_0018;msp_0030;msp_0039;msp_0050;msp_0055;msp_0060;msp_0065;msp_0071;msp_0075;msp_0076;msp_0082c;msp_0100;msp_0108;msp_0111;msp_0112;msp_0113;msp_0140;msp_0152;msp_0154;msp_0157;msp_0163;msp_0165;msp_0180;msp_0181;msp_0185;msp_0189;msp_0209;msp_0228;msp_0237;msp_0238;msp_0272;msp_0273;msp_0314;msp_0330;msp_0332;msp_0337;msp_0341;msp_0350;msp_0358;msp_0371;msp_0373;ms…	Escherichia coli;Eisenbergiella tayi;Roseburia intestinalis;Eisenbergiella massiliensis;Klebsiella pneumoniae;Lachnospiraceae bacterium hRUG904 / Clostridiales bacterium RUG495 / [Clostridium] sp. CAG:127;Anaerobutyricum hallii;Firmicutes bacterium CAG:65 / [Clostridium] sp. 2789STDY5608883;Lachnospiraceae bacterium CIM:MAG 844 / Firmicutes bacterium CAG:95;[Ruminococcus] sp. CAG:17 / Blautia sp.…	M00854:Glycogen biosynthesis, glucose-1P => glycogen/starch	Other carbohydrate metabolism	K02805;K10012	-	c4711	-	-	-	-	dTDP-4-amino-4,6-dideoxygalactose transaminase (EC 2.6.1.59)	K02805;c4711;K10012
CL-439	7	96	Yes	No	msp_0005;msp_0009;msp_0014;msp_0018;msp_0020;msp_0030;msp_0049;msp_0050;msp_0052;msp_0058;msp_0065;msp_0072;msp_0076;msp_0104;msp_0115c;msp_0140;msp_0141;msp_0150c;msp_0152;msp_0162;msp_0174;msp_0186;msp_0208;msp_0213;msp_0249;msp_0272;msp_0279;msp_0289;msp_0353;msp_0358;msp_0382;msp_0392;msp_0401;msp_0468;msp_0483;msp_0489;msp_0510;msp_0521;msp_0540;msp_0544c;msp_0575;msp_0580;msp_0581;msp_0589c…	Escherichia coli;[Clostridium] bolteae;Eisenbergiella tayi;Eisenbergiella massiliensis;[Clostridium] clostridioforme 1;Klebsiella pneumoniae;unclassified Lachnoclostridium;Anaerobutyricum hallii;Blautia sp. CAG:257;[Ruminococcus] gnavus;[Ruminococcus] sp. CAG:17 / Blautia sp. 2789STDY5608880;Roseburia inulinivorans;Blautia wexlerae;Emergencia timonensis;Lachnoclostridium phytofermentans 2;Klebsie…	-	-	K04028;K04029;K04031;K13922;K04027	BMC;EutN_CcmL	-	-	-	-	-	-	K04028;K04029;K04031;K13922;BMC;EutN_CcmL;K04027
CL-694	4	95	Yes	No	msp_0024;msp_0079;msp_0119;msp_0131;msp_0134;msp_0138;msp_0146c;msp_0166;msp_0197;msp_0212;msp_0213;msp_0215;msp_0245;msp_0263;msp_0268;msp_0289;msp_0309;msp_0359;msp_0364;msp_0366;msp_0383;msp_0392;msp_0406;msp_0413;msp_0419;msp_0426;msp_0437c;msp_0469c;msp_0482;msp_0483;msp_0497;msp_0501;msp_0538;msp_0570;msp_0580;msp_0610;msp_0627;msp_0700;msp_0792;msp_0820;msp_0834;msp_0878;msp_0889;msp_0906;…	Hungatella effluvii;[Clostridium] sp. CAG:7;unclassified Acidaminococcaceae;Phascolarctobacterium faecium;Megamonas funiformis == rupellensis;Bifidobacterium pseudocatenulatum;Streptococcus sanguinis;Bifidobacterium longum;Megasphaera sp. BL7 & NM10;Dialister invisus;Flavonifractor plautii;Dialister sp. Marseille-P5638 & CAG:357;Megasphaera massiliensis;Bifidobacterium adolescentis;Blautia sp. N6…	-	-	K00936	H_kinase_N;HisKA_2;HWE_HK	-	-	-	-	-	-	H_kinase_N;HisKA_2;HWE_HK;K00936
CL-193	3	95	Yes	No	msp_0005;msp_0009;msp_0014;msp_0020;msp_0024;msp_0030;msp_0044;msp_0049;msp_0103;msp_0108;msp_0112;msp_0134;msp_0140;msp_0146c;msp_0153;msp_0157;msp_0167c;msp_0177;msp_0185;msp_0186;msp_0209;msp_0231;msp_0233;msp_0236;msp_0241;msp_0254;msp_0272;msp_0274;msp_0278;msp_0281;msp_0308;msp_0329;msp_0334;msp_0341;msp_0350;msp_0360;msp_0362;msp_0368c;msp_0379;msp_0380;msp_0403;msp_0545;msp_0559;msp_0562;…	Escherichia coli;[Clostridium] bolteae;Eisenbergiella tayi;[Clostridium] clostridioforme 1;Hungatella effluvii;Klebsiella pneumoniae;Hungatella hathewayi 1;unclassified Lachnoclostridium;[Clostridium] innocuum;Enterobacter hormaechei;Blautia hydrogenotrophica;Megamonas funiformis == rupellensis;Klebsiella oxytoca;Streptococcus sanguinis;Erysipelatoclostridium ramosum;Klebsiella aerogenes;Plesiomo…	-	-	K01226;K02819	-	-	cazy.GH13_29	-	-	-	-	K01226;cazy.GH13_29;K02819
CL-590	3	93	Yes	No	msp_0005;msp_0092;msp_0106;msp_0109;msp_0110;msp_0113;msp_0145;msp_0180;msp_0193;msp_0195;msp_0202;msp_0226;msp_0228;msp_0253;msp_0269;msp_0279;msp_0280;msp_0288;msp_0292;msp_0295;msp_0298;msp_0301;msp_0303;msp_0317;msp_0345;msp_0346;msp_0386;msp_0388;msp_0391;msp_0396;msp_0398;msp_0453;msp_0466;msp_0541;msp_0573;msp_0618;msp_0626;msp_0638;msp_0666;msp_0677c;msp_0704;msp_0732;msp_0734;msp_0745;ms…	Escherichia coli;Sutterella wadsworthensis 1;Clostridiales bacterium UBA7273 / Firmicutes bacterium CAG:240;[Clostridium] scindens 2;Bilophila wadsworthia;Blautia producta 2;Parasutterella excrementihominis;Blautia coccoides == Blautia producta;[Clostridium] scindens 1;Desulfovibrio piger;[Acinetobacter] sp. N54.MGS-139 / Proteobacteria bacterium CAG:139;Desulfovibrionaceae bacterium CIM:MAG 900;…	M00198:Putative sn-glycerol-phosphate transport system	Saccharide, polyol, and lipid transport system	K03738	AFOR_C;AFOR_N	-	-	-	-	-	-	AFOR_C;AFOR_N;K03738
CL-558	5	89	Yes	No	msp_0010;msp_0011;msp_0012;msp_0016;msp_0023;msp_0025;msp_0026;msp_0027;msp_0028;msp_0033;msp_0040;msp_0043;msp_0054;msp_0061;msp_0070;msp_0082c;msp_0083;msp_0096;msp_0098;msp_0101;msp_0102;msp_0110;msp_0114;msp_0156;msp_0184;msp_0195;msp_0198;msp_0201;msp_0214;msp_0235;msp_0253;msp_0267;msp_0293;msp_0295;msp_0318;msp_0324;msp_0377;msp_0411;msp_0412;msp_0438;msp_0443;msp_0465;msp_0470;msp_0495;ms…	Bacteroides fragilis 1;Bacteroides thetaiotaomicron;Parabacteroides distasonis;Bacteroides plebeius;Bacteroides caccae;Akkermansia muciniphila;Paraprevotella clara;Parabacteroides merdae;Parabacteroides goldsteinii;Bacteroides fragilis 2;Bacteroides massiliensis;Bacteroides coprocola;Bacteroides nordii;Bacteroides congonensis;Akkermansia muciniphila 2;Providencia rettgeri 2;Parabacteroides johnso…	-	-	K00428	CCP_MauG;Cytochrom_C;Cytochrome_CBB3;Haem_bd	-	-	-	-	-	-	CCP_MauG;Cytochrom_C;Cytochrome_CBB3;Haem_bd;K00428
CL-518	3	89	Yes	No	msp_0003;msp_0007;msp_0008;msp_0011;msp_0021;msp_0032;msp_0038;msp_0061;msp_0064;msp_0069;msp_0089;msp_0091;msp_0092;msp_0098;msp_0108;msp_0130;msp_0157;msp_0174;msp_0187;msp_0195;msp_0209;msp_0214;msp_0219;msp_0239;msp_0261;msp_0267;msp_0280;msp_0288;msp_0300;msp_0328;msp_0349;msp_0386;msp_0414;msp_0416;msp_0465;msp_0466;msp_0474;msp_0503;msp_0508;msp_0532;msp_0537;msp_0564;msp_0616;msp_0617;msp…	Bacteroides cellulosilyticus;Bacteroides ovatus;Bacteroides intestinalis;Bacteroides thetaiotaomicron;Bacteroides xylanisolvens;Alistipes onderdonkii;unclassified Lentisphaeria;Bacteroides congonensis;unclassified Bacteroidales [Alistipes] sp. CAG:435;Bacteroides vulgatus;Alistipes finegoldii;Prevotella sp. CAG:604;Sutterella wadsworthensis 1;Parabacteroides gordonii;Enterobacter hormaechei;Candi…	-	-	K00647	Ketoacyl-synt_2	-	-	-	arylpolyene	-	-	K00647;Ketoacyl-synt_2;arylpolyene
CL-361	4	88	Yes	No	msp_0052;msp_0065;msp_0076;msp_0112;msp_0113;msp_0141;msp_0142;msp_0154;msp_0163;msp_0164;msp_0165;msp_0171;msp_0180;msp_0181;msp_0182;msp_0189;msp_0208;msp_0240;msp_0268;msp_0272;msp_0309;msp_0312;msp_0328;msp_0384;msp_0422;msp_0424;msp_0436;msp_0455;msp_0473c;msp_0564;msp_0579;msp_0620;msp_0621;msp_0625;msp_0643;msp_0660;msp_0722;msp_0775;msp_0782;msp_0824;msp_0896;msp_0901;msp_0909;msp_0915c;m…	Blautia sp. CAG:257;[Ruminococcus] sp. CAG:17 / Blautia sp. 2789STDY5608880;Blautia wexlerae;Blautia hydrogenotrophica;Blautia producta 2;Blautia massiliensis;Blautia sp. CAG:52 & SG-772 & sp. 2789STDY5834917;Fusicatenibacter saccharivorans;Firmicutes bacterium CAG:227;[Ruminococcus] sp. 2789STDY5608794 & sp. 2789STDY5834890 / Firmicutes bacterium CAG:56;unclassified Lachnospiraceae;Blautia hanse…	M00377:Reductive acetyl-CoA pathway (Wood-Ljungdahl pathway) ;M00357:Methanogenesis, acetate => methane ;M00422:Acetyl-CoA pathway, CO2 => acetyl-CoA	Carbon fixation;Methane metabolism	K00197;K15023;K00194	CdhD	-	-	-	-	-	-	K00197;K15023;CdhD;K00194
CL-1433	4	88	Yes	No	msp_0057;msp_0109;msp_0113;msp_0146c;msp_0209;msp_0236;msp_0274;msp_0315;msp_0329;msp_0333;msp_0380;msp_0396;msp_0403;msp_0404;msp_0408;msp_0462;msp_0472;msp_0486;msp_0497;msp_0573;msp_0600c;msp_0602c;msp_0630;msp_0666;msp_0691;msp_0707;msp_0712;msp_0723;msp_0742;msp_0767;msp_0785;msp_0793;msp_0794;msp_0832;msp_0833;msp_0840;msp_0843;msp_0853c;msp_0890c;msp_0892;msp_0925;msp_0935;msp_0946;msp_096…	Roseburia sp. CAG:45 & sp. 2789STDY5608886;[Clostridium] scindens 2;Blautia producta 2;Streptococcus sanguinis;Enterobacter roggenkampii;[Eubacterium] ventriosum;Sellimonas intestinalis == Drancourtella massiliensis;Firmicutes bacterium CAG:145;Clostridium butyricum;Lactobacillus ruminis;Streptococcus salivarius;Adlercreutzia equolifaciens;Enterococcus faecium;unclassified Clostridiales 5;Lactoba…	-	-	K03739;K14188;K03740	DltD	-	-	-	-	-	-	K03739;K14188;DltD;K03740
CL-1335	3	86	Yes	No	msp_0005;msp_0009;msp_0017;msp_0030;msp_0034;msp_0049;msp_0108;msp_0124;msp_0125;msp_0140;msp_0154;msp_0157;msp_0174;msp_0177;msp_0186;msp_0209;msp_0241;msp_0265;msp_0269;msp_0291;msp_0301;msp_0308;msp_0345;msp_0354;msp_0374;msp_0382;msp_0388;msp_0389;msp_0399;msp_0407;msp_0408;msp_0418;msp_0424;msp_0456;msp_0457;msp_0459;msp_0462;msp_0466;msp_0484;msp_0494;msp_0544c;msp_0553;msp_0562;msp_0597;ms…	Escherichia coli;[Clostridium] bolteae;Roseburia intestinalis;Klebsiella pneumoniae;[Faecalibacterium] sp. CAG:74;unclassified Lachnoclostridium;Enterobacter hormaechei;Candidatus Cibiobacter qucibialis;Firmicutes bacterium CAG:24 / [Clostridium] sp. 2789STDY5834869 & 2789STDY5834922;Klebsiella oxytoca;Fusicatenibacter saccharivorans;Klebsiella aerogenes;Klebsiella quasipneumoniae;unclassified La…	M00197:Putative fructooligosaccharide transport system	Saccharide, polyol, and lipid transport system	K10009;K10010;K02424	-	-	-	-	-	-	-	K10009;K10010;K02424
CL-27	3	85	Yes	No	msp_0005;msp_0025;msp_0029;msp_0030;msp_0038;msp_0041;msp_0070;msp_0078;msp_0080;msp_0082c;msp_0084;msp_0091;msp_0100;msp_0108;msp_0110;msp_0116;msp_0120;msp_0123;msp_0140;msp_0157;msp_0159;msp_0167c;msp_0174;msp_0176;msp_0195;msp_0199;msp_0201;msp_0209;msp_0224;msp_0226;msp_0228;msp_0229;msp_0251;msp_0257;msp_0275;msp_0295;msp_0339;msp_0341;msp_0368c;msp_0369;msp_0411;msp_0426;msp_0437c;msp_0465…	Escherichia coli;Akkermansia muciniphila;[Eubacterium] eligens;Klebsiella pneumoniae;unclassified Lentisphaeria;Prevotella copri 1;Akkermansia muciniphila 2;Prevotella sp. CAG:732;Prevotellamassilia timonensis;Providencia rettgeri 2;Prevotella sp. RUG457 & sp. RUG782 & sp. CAG:386;Prevotella sp. CAG:604;Morganella morganii;Enterobacter hormaechei;Bilophila wadsworthia;unclassified Lentisphaeria;u…	-	-	K03579	HA2;HrpB_C	-	-	-	-	-	-	HA2;HrpB_C;K03579
CL-245	3	85	Yes	No	msp_0003;msp_0007;msp_0008;msp_0010;msp_0011;msp_0012;msp_0016;msp_0019;msp_0021;msp_0022;msp_0023;msp_0026;msp_0028;msp_0031;msp_0032;msp_0033;msp_0035;msp_0040;msp_0041;msp_0054;msp_0059;msp_0061;msp_0062;msp_0063;msp_0078;msp_0080;msp_0083;msp_0084;msp_0088;msp_0089;msp_0096;msp_0098;msp_0102;msp_0118;msp_0128;msp_0139;msp_0151;msp_0156;msp_0170;msp_0190;msp_0191;msp_0198;msp_0217;msp_0219;msp…	Bacteroides cellulosilyticus;Bacteroides ovatus;Bacteroides intestinalis;Bacteroides fragilis 1;Bacteroides thetaiotaomicron;Parabacteroides distasonis;Bacteroides plebeius;Bacteroides faecis;Bacteroides xylanisolvens;Bacteroides finegoldii;Bacteroides caccae;Paraprevotella clara;Parabacteroides goldsteinii;Bacteroides stercoris;Alistipes onderdonkii;Bacteroides fragilis 2;Bacteroides dorei;Bacte…	-	-	-	Fimbrillin_C;P_gingi_FimA;DUF4906	-	-	-	-	-	-	Fimbrillin_C;P_gingi_FimA;DUF4906
CL-310	3	85	Yes	No	msp_0003;msp_0007;msp_0008;msp_0010;msp_0011;msp_0012;msp_0023;msp_0026;msp_0027;msp_0028;msp_0031;msp_0032;msp_0033;msp_0035;msp_0036;msp_0040;msp_0043;msp_0046;msp_0051;msp_0062;msp_0064;msp_0069;msp_0083;msp_0088;msp_0097;msp_0098;msp_0101;msp_0102;msp_0114;msp_0117;msp_0122;msp_0143;msp_0151;msp_0155;msp_0156;msp_0190;msp_0211;msp_0217;msp_0225;msp_0256;msp_0264;msp_0316;msp_0324;msp_0335;msp…	Bacteroides cellulosilyticus;Bacteroides ovatus;Bacteroides intestinalis;Bacteroides fragilis 1;Bacteroides thetaiotaomicron;Parabacteroides distasonis;Bacteroides caccae;Paraprevotella clara;Parabacteroides merdae;Parabacteroides goldsteinii;Bacteroides stercoris;Alistipes onderdonkii;Bacteroides fragilis 2;Bacteroides dorei;Bacteroides eggerthii;Bacteroides massiliensis;Bacteroides coprocola;Ba…	-	-	-	DUF5128;TolB_like;DUF4934	-	-	-	-	-	-	DUF5128;TolB_like;DUF4934
CL-643	3	85	Yes	No	msp_0055;msp_0074;msp_0075;msp_0079;msp_0134;msp_0146c;msp_0233;msp_0254;msp_0265;msp_0329;msp_0332;msp_0360;msp_0371;msp_0380;msp_0382;msp_0388;msp_0403;msp_0427;msp_0457;msp_0480;msp_0488;msp_0497;msp_0514;msp_0559;msp_0562;msp_0566;msp_0573;msp_0600c;msp_0622;msp_0638;msp_0639;msp_0656;msp_0662;msp_0691;msp_0696;msp_0701;msp_0712;msp_0744;msp_0750;msp_0770;msp_0785;msp_0832;msp_0833;msp_0843;m…	Firmicutes bacterium CAG:65 / [Clostridium] sp. 2789STDY5608883;Roseburia sp. CAG:100 / Lachnospiraceae bacterium CIM:MAG 54;Lachnospiraceae bacterium GAM79 / [Clostridium] sp. CAG:91 & sp. 2789STDY5834873;[Clostridium] sp. CAG:7;Megamonas funiformis == rupellensis;Streptococcus sanguinis;unclassified Lachnoclostridium;unclassified Lachnoclostridium;Faecalibacterium prausnitzii 7;Clostridium buty…	-	-	K10040;K10041;K10039	-	-	-	-	-	-	-	K10040;K10041;K10039
CL-204	3	84	Yes	No	msp_0003;msp_0007;msp_0008;msp_0011;msp_0012;msp_0015;msp_0016;msp_0017;msp_0021;msp_0022;msp_0023;msp_0026;msp_0027;msp_0031;msp_0033;msp_0035;msp_0036;msp_0040;msp_0042;msp_0043;msp_0046;msp_0059;msp_0071;msp_0072;msp_0083;msp_0089;msp_0090;msp_0097;msp_0114;msp_0138;msp_0166;msp_0195;msp_0196;msp_0206;msp_0224;msp_0225;msp_0242;msp_0259;msp_0275;msp_0280;msp_0307;msp_0318;msp_0359;msp_0381;msp…	Bacteroides cellulosilyticus;Bacteroides ovatus;Bacteroides intestinalis;Bacteroides thetaiotaomicron;Parabacteroides distasonis;Roseburia faecis;Bacteroides plebeius;Roseburia intestinalis;Bacteroides xylanisolvens;Bacteroides finegoldii;Bacteroides caccae;Paraprevotella clara;Parabacteroides merdae;Bacteroides stercoris;Bacteroides fragilis 2;Bacteroides dorei;Bacteroides eggerthii;Bacteroides …	M00173:Reductive citrate cycle (Arnon-Buchanan cycle) ;M00376:3-Hydroxypropionate bi-cycle ;M00009:Citrate cycle (TCA cycle, Krebs cycle) ;M00011:Citrate cycle, second carbon oxidation, 2-oxoglutarate => oxaloacetate	Carbon fixation;Central carbohydrate metabolism	-	-	-	-	-	-	Anaerobe;Rod-shaped;Nonsporulating	-	Anaerobe;Rod-shaped;Nonsporulating
CL-548	4	83	Yes	No	msp_0002;msp_0005;msp_0030;msp_0082c;msp_0100;msp_0108;msp_0138;msp_0140;msp_0147;msp_0157;msp_0166;msp_0167c;msp_0170;msp_0174;msp_0183;msp_0209;msp_0220;msp_0228;msp_0241;msp_0263;msp_0295;msp_0368c;msp_0375;msp_0419;msp_0437c;msp_0465;msp_0469c;msp_0503;msp_0518;msp_0532;msp_0544c;msp_0570;msp_0584;msp_0595;msp_0626;msp_0627;msp_0642;msp_0656;msp_0695;msp_0715c;msp_0718;msp_0754c;msp_0788;msp_…	Blastocystis sp. subtype 1;Escherichia coli;Klebsiella pneumoniae;Providencia rettgeri 2;Morganella morganii;Enterobacter hormaechei;Bifidobacterium pseudocatenulatum;Klebsiella oxytoca;unclassified Ruminococcaceae;Klebsiella aerogenes;Bifidobacterium longum;Plesiomonas shigelloides;Azospirillum sp. CAG:239;Klebsiella quasipneumoniae;[Acetobacter] sp. 46_36 & CAG:267 / Alphaproteobacteria bacteri…	M00249:Capsular polysaccharide transport system	ABC-2 type and other transport systems	K00325;K00324	PNTB;PNTB_4TM	-	-	-	-	-	-	K00325;PNTB;PNTB_4TM;K00324
CL-306	3	82	Yes	No	msp_0001;msp_0002;msp_0003;msp_0004;msp_0005;msp_0006;msp_0017;msp_0021;msp_0036;msp_0039;msp_0046;msp_0048;msp_0065;msp_0071;msp_0090;msp_0094;msp_0095;msp_0123;msp_0130;msp_0134;msp_0141;msp_0152;msp_0154;msp_0162;msp_0164;msp_0169;msp_0206;msp_0230;msp_0250;msp_0260;msp_0261;msp_0275;msp_0288;msp_0296;msp_0332;msp_0343;msp_0356;msp_0366;msp_0376;msp_0416;msp_0441;msp_0448;msp_0489;msp_0523;msp…	Blastocystis sp. subtype 3;Blastocystis sp. subtype 1;Bacteroides cellulosilyticus;Blastocystis sp. subtype 2;Escherichia coli;Blastocystis sp. subtype 4;Roseburia intestinalis;Bacteroides xylanisolvens;Bacteroides eggerthii;Lachnospiraceae bacterium hRUG904 / Clostridiales bacterium RUG495 / [Clostridium] sp. CAG:127;Bacteroides uniformis;[Eubacterium] sp. CAG:38;[Ruminococcus] sp. CAG:17 / Blau…	-	-	K08239	Stealth_CR1;Stealth_CR2	-	-	-	-	-	-	Stealth_CR1;Stealth_CR2;K08239
CL-411	8	81	Yes	No	msp_0015;msp_0017;msp_0034;msp_0045;msp_0048;msp_0050;msp_0074;msp_0077;msp_0087;msp_0092;msp_0093;msp_0107;msp_0121;msp_0134;msp_0141;msp_0142;msp_0150c;msp_0163;msp_0164;msp_0175;msp_0194;msp_0195;msp_0197;msp_0206;msp_0207;msp_0227;msp_0239;msp_0247;msp_0250;msp_0270;msp_0280;msp_0281;msp_0294;msp_0307;msp_0333;msp_0338;msp_0366;msp_0392;msp_0406;msp_0408;msp_0414;msp_0426;msp_0431;msp_0433;ms…	Roseburia faecis;Roseburia intestinalis;[Faecalibacterium] sp. CAG:74;Ruminococcus bromii 2;[Eubacterium] sp. CAG:38;Anaerobutyricum hallii;Roseburia sp. CAG:100 / Lachnospiraceae bacterium CIM:MAG 54;unclassified Lachnospiraceae;Lachnospira pectinoschiza;Sutterella wadsworthensis 1;[Clostridium] sp. CAG:62;Anaerostipes hadrus 1;Oscillibacter sp. CAG:241_62_21;Megamonas funiformis == rupellensis;…	-	-	K07016;K19138;K19139;K19140;K09002	CRISPR_Cas6;Csm2_III-A;RAMPs	-	-	-	-	-	-	K07016;K19138;K19139;K19140;CRISPR_Cas6;Csm2_III-A;RAMPs;K09002
CL-630	3	81	Yes	No	msp_0014;msp_0015;msp_0017;msp_0024;msp_0044;msp_0052;msp_0055;msp_0056;msp_0057;msp_0060;msp_0065;msp_0068;msp_0071;msp_0074;msp_0075;msp_0076;msp_0094;msp_0113;msp_0115c;msp_0125;msp_0135;msp_0141;msp_0142;msp_0152;msp_0154;msp_0163;msp_0165;msp_0171;msp_0178;msp_0180;msp_0186;msp_0189;msp_0193;msp_0208;msp_0237;msp_0244;msp_0246;msp_0265;msp_0272;msp_0274;msp_0298;msp_0299;msp_0308;msp_0329;ms…	Eisenbergiella tayi;Roseburia faecis;Roseburia intestinalis;Hungatella effluvii;Hungatella hathewayi 1;Blautia sp. CAG:257;Firmicutes bacterium CAG:65 / [Clostridium] sp. 2789STDY5608883;unclassified Lachnoclostridium;Roseburia sp. CAG:45 & sp. 2789STDY5608886;Lachnospiraceae bacterium CIM:MAG 844 / Firmicutes bacterium CAG:95;[Ruminococcus] sp. CAG:17 / Blautia sp. 2789STDY5608880;[Eubacterium] …	M00603:Putative aldouronate transport system	Saccharide, polyol, and lipid transport system	K10189;K10190;K10188	-	-	-	-	-	-	-	K10189;K10190;K10188
CL-647	11	79	Yes	No	msp_0009;msp_0014;msp_0018;msp_0020;msp_0024;msp_0034;msp_0044;msp_0049;msp_0056;msp_0115c;msp_0121;msp_0131;msp_0181;msp_0204;msp_0238;msp_0258;msp_0303;msp_0314;msp_0315;msp_0317;msp_0319;msp_0342;msp_0391;msp_0413;msp_0423;msp_0426;msp_0435;msp_0454;msp_0461;msp_0472;msp_0487;msp_0513;msp_0536;msp_0538;msp_0541;msp_0545;msp_0579;msp_0592;msp_0594;msp_0622;msp_0640;msp_0686;msp_0704;msp_0793;ms…	[Clostridium] bolteae;Eisenbergiella tayi;Eisenbergiella massiliensis;[Clostridium] clostridioforme 1;Hungatella effluvii;[Faecalibacterium] sp. CAG:74;Hungatella hathewayi 1;unclassified Lachnoclostridium;unclassified Lachnoclostridium;Lachnoclostridium phytofermentans 2;Oscillibacter sp. CAG:241_62_21;Phascolarctobacterium faecium;unclassified Marvinbryantia;Clostridia bacterium UC5.1-1D10 / [C…	M00725:Cationic antimicrobial peptide (CAMP) resistance, dltABCD operon	Drug resistance	K05567;K05568;K05569;K05570;K05571;K05566	DUF4040;MnhB;MNHE;MrpF_PhaF;PhaG_MnhG_YufB	-	-	-	-	-	-	K05567;K05568;K05569;K05570;K05571;DUF4040;MnhB;MNHE;MrpF_PhaF;PhaG_MnhG_YufB;K05566
CL-342	4	79	Yes	No	msp_0017;msp_0018;msp_0048;msp_0050;msp_0071;msp_0074;msp_0076;msp_0077;msp_0079;msp_0094;msp_0138;msp_0154;msp_0163;msp_0164;msp_0169;msp_0180;msp_0197;msp_0208;msp_0227;msp_0238;msp_0244;msp_0249;msp_0263;msp_0266;msp_0272;msp_0273;msp_0305;msp_0332;msp_0345;msp_0376;msp_0380;msp_0387;msp_0399;msp_0406;msp_0418;msp_0433;msp_0434;msp_0436;msp_0441;msp_0457;msp_0489;msp_0492;msp_0506;msp_0542;msp…	Roseburia intestinalis;Eisenbergiella massiliensis;[Eubacterium] sp. CAG:38;Anaerobutyricum hallii;Roseburia hominis;Roseburia sp. CAG:100 / Lachnospiraceae bacterium CIM:MAG 54;Blautia wexlerae;unclassified Lachnospiraceae;[Clostridium] sp. CAG:7;unclassified Roseburia;Bifidobacterium pseudocatenulatum;Fusicatenibacter saccharivorans;Firmicutes bacterium CAG:227;[Ruminococcus] sp. 2789STDY560879…	-	-	K21012	DUF3492;DUF2194;PelG	-	-	-	-	-	-	DUF3492;DUF2194;PelG;K21012
CL-433	4	78	Yes	No	msp_0003;msp_0008;msp_0011;msp_0014;msp_0018;msp_0019;msp_0023;msp_0024;msp_0027;msp_0028;msp_0040;msp_0046;msp_0060;msp_0073;msp_0085;msp_0089;msp_0099;msp_0114;msp_0116;msp_0120;msp_0142;msp_0143;msp_0147;msp_0156;msp_0159;msp_0180;msp_0181;msp_0198;msp_0214;msp_0217;msp_0219;msp_0248;msp_0249;msp_0264;msp_0316;msp_0340;msp_0363;msp_0381;msp_0382;msp_0401;msp_0439;msp_0448;msp_0470;msp_0547;msp…	Bacteroides cellulosilyticus;Bacteroides intestinalis;Bacteroides thetaiotaomicron;Eisenbergiella tayi;Eisenbergiella massiliensis;Bacteroides faecis;Bacteroides caccae;Hungatella effluvii;Parabacteroides merdae;Parabacteroides goldsteinii;Bacteroides massiliensis;Bacteroides uniformis;Lachnospiraceae bacterium CIM:MAG 844 / Firmicutes bacterium CAG:95;Victivallales bacterium CCUG 44730;unclassif…	-	-	K17108	DUF608;Glyco_hydr_116N	-	cazy.GH116	-	-	-	-	K17108;DUF608;Glyco_hydr_116N;cazy.GH116
CL-621	3	78	Yes	No	msp_0009;msp_0014;msp_0017;msp_0018;msp_0020;msp_0052;msp_0060;msp_0072;msp_0085;msp_0109;msp_0112;msp_0113;msp_0124;msp_0180;msp_0182;msp_0185;msp_0189;msp_0193;msp_0213;msp_0237;msp_0265;msp_0272;msp_0276;msp_0286;msp_0309;msp_0312;msp_0314;msp_0350;msp_0358;msp_0370;msp_0374;msp_0379;msp_0385;msp_0407;msp_0410;msp_0418;msp_0437c;msp_0450;msp_0456;msp_0461;msp_0462;msp_0469c;msp_0484;msp_0487;m…	[Clostridium] bolteae;Eisenbergiella tayi;Roseburia intestinalis;Eisenbergiella massiliensis;[Clostridium] clostridioforme 1;Blautia sp. CAG:257;Lachnospiraceae bacterium CIM:MAG 844 / Firmicutes bacterium CAG:95;Roseburia inulinivorans;unclassified Eisenbergiella;[Clostridium] scindens 2;Blautia hydrogenotrophica;Blautia producta 2;Candidatus Cibiobacter qucibialis;Blautia coccoides == Blautia p…	M00375:Hydroxypropionate-hydroxybutylate cycle ;M00374:Dicarboxylate-hydroxybutyrate cycle	Carbon fixation	K20460;K20461;K20459	-	-	-	-	-	-	-	K20460;K20461;K20459
CL-390	14	76	Yes	No	msp_0014;msp_0030;msp_0062;msp_0082c;msp_0089;msp_0100;msp_0108;msp_0110;msp_0140;msp_0184;msp_0216;msp_0228;msp_0362;msp_0428;msp_0439;msp_0476;msp_0523;msp_0580;msp_0593;msp_0614;msp_0653;msp_1766;msp_1816;msp_1820;msp_1839;msp_1978;msp_0052;msp_0134;msp_0164;msp_0189;msp_0244;msp_0272;msp_0309;msp_0333;msp_0359;msp_0437c;msp_0539;msp_0543c;msp_0559;msp_0626;msp_0756;msp_0888;msp_1038;msp_1848;…	Eisenbergiella tayi;Klebsiella pneumoniae;Odoribacter splanchnicus;Providencia rettgeri 2;Alistipes finegoldii;Morganella morganii;Enterobacter hormaechei;Bilophila wadsworthia;Klebsiella oxytoca;Culturomica massiliensis;Odoribacter laneus;Proteus mirabilis;Clostridium saudiense;Bacteroidales bacterium H5;unclassified Alistipes;Muribaculaceae bacterium sp5;unclassified Alistipes;unclassified Fuso…	-	-	K01428;K03187;K03188;K03190;K01430;K01429	Urease_alpha;Urease_beta;Urease_gamma;UreD;UreE_C;UreE_N;UreF	MT1898	-	-	-	-	Urease alpha subunit (EC 3.5.1.5)	K01428;K03187;K03188;K03190;K01430;Urease_alpha;Urease_beta;Urease_gamma;UreD;UreE_C;UreE_N;UreF;MT1898;K01429
CL-438	8	76	Yes	No	msp_0005;msp_0014;msp_0018;msp_0030;msp_0086;msp_0100;msp_0110;msp_0115c;msp_0140;msp_0180;msp_0213;msp_0268;msp_0269;msp_0270;msp_0279;msp_0289;msp_0309;msp_0312;msp_0314;msp_0364;msp_0365;msp_0384;msp_0392;msp_0442;msp_0580;msp_0587;msp_0597;msp_0626;msp_0643;msp_0761;msp_0784;msp_0792;msp_0855;msp_0867;msp_0906;msp_0930;msp_1098;msp_1136;msp_1432;msp_1641;msp_1783;msp_0104;msp_0146c;msp_0276;m…	Escherichia coli;Eisenbergiella tayi;Eisenbergiella massiliensis;Klebsiella pneumoniae;[Clostridium] symbiosum;Morganella morganii;Bilophila wadsworthia;Lachnoclostridium phytofermentans 2;Klebsiella oxytoca;Blautia coccoides == Blautia producta;Flavonifractor plautii;Blautia sp. N6H1-15;unclassified Clostridiales 5;unclassified Clostridiales 5;Cloacibacillus porcorum;Fusobacterium varium;unclass…	-	-	K03736;K04019;K04032;K03735;K04026	EutA;EutB;EutC	-	-	-	-	-	-	K03736;K04019;K04032;EutA;EutB;EutC;K03735;K04026
CL-542	4	75	Yes	No	msp_0042;msp_0047;msp_0076;msp_0082c;msp_0093;msp_0100;msp_0107;msp_0112;msp_0115c;msp_0133;msp_0134;msp_0150c;msp_0162;msp_0163;msp_0171;msp_0175;msp_0179;msp_0180;msp_0194;msp_0200;msp_0207;msp_0223;msp_0238;msp_0243;msp_0247;msp_0268;msp_0305;msp_0309;msp_0340;msp_0368c;msp_0372;msp_0395;msp_0420;msp_0427;msp_0444;msp_0465;msp_0499;msp_0503;msp_0532;msp_0542;msp_0554;msp_0558;msp_0606;msp_0626…	Coprococcus eutactus 2;[Eubacterium] sp. CAG:115;Blautia wexlerae;Providencia rettgeri 2;[Clostridium] sp. CAG:62;Morganella morganii;Anaerostipes hadrus 1;Blautia hydrogenotrophica;Lachnoclostridium phytofermentans 2;Coprococcus sp. 2789STDY5608819 / [Clostridium] sp. CAG:264;Megamonas funiformis == rupellensis;[Clostridium] methylpentosum;unclassified Blautia;Firmicutes bacterium CAG:227;Blauti…	-	-	K00209	Eno-Rase_FAD_bd;Eno-Rase_NADH_b;Enoyl_reductase	-	-	-	-	-	-	Eno-Rase_FAD_bd;Eno-Rase_NADH_b;Enoyl_reductase;K00209
CL-693	4	75	Yes	No	msp_0013;msp_0015;msp_0017;msp_0020;msp_0024;msp_0052;msp_0055;msp_0058;msp_0060;msp_0065;msp_0066;msp_0075;msp_0085;msp_0093;msp_0103;msp_0126;msp_0142;msp_0160;msp_0164;msp_0165;msp_0169;msp_0182;msp_0208;msp_0238;msp_0246;msp_0247;msp_0254;msp_0299;msp_0309;msp_0321;msp_0332;msp_0338;msp_0373;msp_0382;msp_0422;msp_0467;msp_0479;msp_0489;msp_0558;msp_0559;msp_0563;msp_0580;msp_0591;msp_0634;msp…	Ruminococcus bicirculans;Roseburia faecis;Roseburia intestinalis;[Clostridium] clostridioforme 1;Hungatella effluvii;Blautia sp. CAG:257;Firmicutes bacterium CAG:65 / [Clostridium] sp. 2789STDY5608883;[Ruminococcus] gnavus;Lachnospiraceae bacterium CIM:MAG 844 / Firmicutes bacterium CAG:95;[Ruminococcus] sp. CAG:17 / Blautia sp. 2789STDY5608880;[Clostridium] sp. AT4;Lachnospiraceae bacterium GAM7…	-	-	-	DUF2398;DUF2399;DUF3323;DUF2397	-	-	-	-	-	-	DUF2398;DUF2399;DUF3323;DUF2397
CL-180	3	75	Yes	No	msp_0005;msp_0030;msp_0032;msp_0062;msp_0064;msp_0088;msp_0098;msp_0108;msp_0128;msp_0138;msp_0140;msp_0151;msp_0155;msp_0156;msp_0157;msp_0166;msp_0167c;msp_0174;msp_0191;msp_0209;msp_0216;msp_0225;msp_0241;msp_0263;msp_0266;msp_0281;msp_0326;msp_0338;msp_0351;msp_0368c;msp_0419;msp_0458;msp_0469c;msp_0497;msp_0531;msp_0537;msp_0570;msp_0585;msp_0590;msp_0600c;msp_0602c;msp_0626;msp_0627;msp_063…	Escherichia coli;Klebsiella pneumoniae;Alistipes onderdonkii;Odoribacter splanchnicus;unclassified Bacteroidales [Alistipes] sp. CAG:435;Butyricimonas sp. Marseille-P3923;Parabacteroides gordonii;Enterobacter hormaechei;Butyricimonas virosa;Bifidobacterium pseudocatenulatum;Klebsiella oxytoca;Butyricimonas synergistica 2;Parabacteroides sp. 426-9;unclassified Parabacteroides;Klebsiella aerogenes;…	-	-	K02440;K06188	MIP	-	-	-	-	-	-	MIP;K02440;K06188
CL-585	3	75	Yes	No	msp_0005;msp_0081;msp_0082c;msp_0092;msp_0100;msp_0119;msp_0131;msp_0134;msp_0136;msp_0145;msp_0212;msp_0221;msp_0228;msp_0280;msp_0288;msp_0359;msp_0383;msp_0413;msp_0414;msp_0426;msp_0466;msp_0482;msp_0488;msp_0538;msp_0544c;msp_0594;msp_0603c;msp_0617;msp_0618;msp_0649;msp_0656;msp_0696;msp_0714c;msp_0715c;msp_0744;msp_0768;msp_0801;msp_0834;msp_0869;msp_0881;msp_0889;msp_0913;msp_0926;msp_099…	Escherichia coli;unclassified Prevotella;Providencia rettgeri 2;Sutterella wadsworthensis 1;Morganella morganii;unclassified Acidaminococcaceae;Phascolarctobacterium faecium;Megamonas funiformis == rupellensis;Prevotella sp. P4-51 & PA-67 & P5-64 & P5-108 & CAG:474;Parasutterella excrementihominis;Dialister invisus;Acidaminococcus intestini;Proteus mirabilis;Sutterella wadsworthensis 2;unclassifi…	-	-	K02471	ABC_membrane_2;SbmA_BacA	-	-	-	-	-	-	ABC_membrane_2;SbmA_BacA;K02471
CL-1327	3	75	Yes	No	msp_0009;msp_0020;msp_0049;msp_0052;msp_0055;msp_0056;msp_0065;msp_0075;msp_0076;msp_0093;msp_0115c;msp_0134;msp_0138;msp_0141;msp_0162;msp_0166;msp_0168;msp_0181;msp_0189;msp_0204;msp_0208;msp_0238;msp_0240;msp_0242;msp_0243;msp_0244;msp_0272;msp_0329;msp_0330;msp_0360;msp_0371;msp_0385;msp_0391;msp_0403;msp_0436;msp_0469c;msp_0480;msp_0482;msp_0505;msp_0513;msp_0522;msp_0545;msp_0552;msp_0558;m…	[Clostridium] bolteae;[Clostridium] clostridioforme 1;unclassified Lachnoclostridium;Blautia sp. CAG:257;Firmicutes bacterium CAG:65 / [Clostridium] sp. 2789STDY5608883;unclassified Lachnoclostridium;[Ruminococcus] sp. CAG:17 / Blautia sp. 2789STDY5608880;Lachnospiraceae bacterium GAM79 / [Clostridium] sp. CAG:91 & sp. 2789STDY5834873;Blautia wexlerae;[Clostridium] sp. CAG:62;Lachnoclostridium ph…	-	-	K10547;K10548;K10546	-	-	-	-	-	-	-	K10547;K10548;K10546
CL-561	5	74	Yes	No	msp_0003;msp_0005;msp_0016;msp_0030;msp_0041;msp_0046;msp_0069;msp_0078;msp_0082c;msp_0084;msp_0086;msp_0091;msp_0101;msp_0102;msp_0110;msp_0116;msp_0123;msp_0140;msp_0157;msp_0176;msp_0190;msp_0195;msp_0209;msp_0219;msp_0224;msp_0226;msp_0228;msp_0229;msp_0253;msp_0260;msp_0275;msp_0293;msp_0295;msp_0320;msp_0329;msp_0336;msp_0339;msp_0341;msp_0368c;msp_0369;msp_0377;msp_0470;msp_0495;msp_0511;m…	Bacteroides cellulosilyticus;Escherichia coli;Bacteroides plebeius;Klebsiella pneumoniae;Prevotella copri 1;Bacteroides uniformis;Bacteroides vulgatus;Prevotella sp. CAG:732;Providencia rettgeri 2;Prevotella sp. RUG457 & sp. RUG782 & sp. CAG:386;[Clostridium] symbiosum;Prevotella sp. CAG:604;Bacteroides sp. CAG:875 & sp. 2789STDY5834845;unclassified Bacteroides;Bilophila wadsworthia;unclassified …	M00211:Putative ABC transport system	Saccharide, polyol, and lipid transport system	K03694;K06891;K00684	ClpS;Leu_Phe_trans	-	-	-	-	-	-	K03694;K06891;ClpS;Leu_Phe_trans;K00684
CL-483	3	74	Yes	No	msp_0003;msp_0007;msp_0008;msp_0011;msp_0012;msp_0014;msp_0016;msp_0018;msp_0019;msp_0021;msp_0022;msp_0029;msp_0032;msp_0035;msp_0036;msp_0037;msp_0041;msp_0043;msp_0048;msp_0059;msp_0061;msp_0067;msp_0069;msp_0083;msp_0084;msp_0096;msp_0102;msp_0113;msp_0118;msp_0122;msp_0143;msp_0149;msp_0154;msp_0155;msp_0158;msp_0180;msp_0198;msp_0227;msp_0255;msp_0256;msp_0267;msp_0272;msp_0294;msp_0320;msp…	Bacteroides cellulosilyticus;Bacteroides ovatus;Bacteroides intestinalis;Bacteroides thetaiotaomicron;Parabacteroides distasonis;Eisenbergiella tayi;Bacteroides plebeius;Eisenbergiella massiliensis;Bacteroides faecis;Bacteroides xylanisolvens;Bacteroides finegoldii;[Eubacterium] eligens;Alistipes onderdonkii;Bacteroides dorei;Bacteroides eggerthii;Bacteroides salyersiae;Prevotella copri 1;Bactero…	-	-	-	Collagen_bind_2;DUF4038	-	cazy.GH140	-	-	-	-	Collagen_bind_2;DUF4038;cazy.GH140
CL-525	3	74	Yes	No	msp_0001;msp_0002;msp_0004;msp_0006;msp_0007;msp_0010;msp_0011;msp_0012;msp_0019;msp_0021;msp_0023;msp_0028;msp_0033;msp_0061;msp_0098;msp_0106;msp_0119;msp_0134;msp_0197;msp_0235;msp_0245;msp_0267;msp_0303;msp_0311;msp_0317;msp_0319;msp_0340;msp_0359;msp_0363;msp_0364;msp_0366;msp_0406;msp_0452;msp_0461;msp_0471;msp_0482;msp_0487;msp_0501;msp_0513;msp_0536;msp_0541;msp_0590;msp_0603c;msp_0654;ms…	Blastocystis sp. subtype 3;Blastocystis sp. subtype 1;Blastocystis sp. subtype 2;Blastocystis sp. subtype 4;Bacteroides ovatus;Bacteroides fragilis 1;Bacteroides thetaiotaomicron;Parabacteroides distasonis;Bacteroides faecis;Bacteroides xylanisolvens;Bacteroides caccae;Parabacteroides goldsteinii;Bacteroides fragilis 2;Bacteroides congonensis;Parabacteroides gordonii;Clostridiales bacterium UBA72…	-	-	K00844	Hexokinase_1;Hexokinase_2	-	-	-	-	-	-	Hexokinase_1;Hexokinase_2;K00844
CL-691	4	73	Yes	No	msp_0001;msp_0002;msp_0004;msp_0006;msp_0025;msp_0070;msp_0110;msp_0130;msp_0170;msp_0195;msp_0201;msp_0220;msp_0226;msp_0262;msp_0295;msp_0325;msp_0328;msp_0365;msp_0369;msp_0375;msp_0405;msp_0411;msp_0455;msp_0465;msp_0478;msp_0503;msp_0532;msp_0557;msp_0564;msp_0585;msp_0620;msp_0642;msp_0660;msp_0672;msp_0775;msp_0782;msp_0788;msp_0795;msp_0819;msp_0824;msp_0830;msp_0838;msp_0882c;msp_0897;ms…	Blastocystis sp. subtype 3;Blastocystis sp. subtype 1;Blastocystis sp. subtype 2;Blastocystis sp. subtype 4;Akkermansia muciniphila;Akkermansia muciniphila 2;Bilophila wadsworthia;Candidatus Gastranaerophilales bacterium x14;Azospirillum sp. CAG:239;Desulfovibrio piger;Akkermansia sp. KLE1605;Azospirillum sp. 51_20;Desulfovibrionaceae bacterium CIM:MAG 900;Ruminococcus callidus;Desulfovibrio fair…	-	-	-	EF-hand_5;EF-hand_6;EF-hand_7;EF-hand_1	-	-	-	-	-	-	EF-hand_5;EF-hand_6;EF-hand_7;EF-hand_1
CL-354	3	73	Yes	No	msp_0052;msp_0065;msp_0076;msp_0112;msp_0113;msp_0141;msp_0142;msp_0154;msp_0163;msp_0164;msp_0165;msp_0171;msp_0180;msp_0181;msp_0182;msp_0189;msp_0192;msp_0205;msp_0208;msp_0240;msp_0268;msp_0269;msp_0270;msp_0272;msp_0309;msp_0312;msp_0356;msp_0361;msp_0384;msp_0404;msp_0424;msp_0436;msp_0453;msp_0473c;msp_0489;msp_0552;msp_0579;msp_0596;msp_0597;msp_0621;msp_0625;msp_0631;msp_0643;msp_0722;ms…	Blautia sp. CAG:257;[Ruminococcus] sp. CAG:17 / Blautia sp. 2789STDY5608880;Blautia wexlerae;Blautia hydrogenotrophica;Blautia producta 2;Blautia massiliensis;Blautia sp. CAG:52 & SG-772 & sp. 2789STDY5834917;Fusicatenibacter saccharivorans;Firmicutes bacterium CAG:227;[Ruminococcus] sp. 2789STDY5608794 & sp. 2789STDY5834890 / Firmicutes bacterium CAG:56;unclassified Lachnospiraceae;Blautia hanse…	M00377:Reductive acetyl-CoA pathway (Wood-Ljungdahl pathway)	Carbon fixation	K14138;K00198	DUF3786	-	-	-	-	-	-	K14138;DUF3786;K00198
CL-620	3	73	Yes	No	msp_0009;msp_0020;msp_0030;msp_0049;msp_0053;msp_0056;msp_0066;msp_0079;msp_0086;msp_0103;msp_0129;msp_0140;msp_0157;msp_0174;msp_0180;msp_0186;msp_0204;msp_0242;msp_0247;msp_0252;msp_0258;msp_0268;msp_0274;msp_0276;msp_0278;msp_0285;msp_0308;msp_0309;msp_0329;msp_0331;msp_0346;msp_0365;msp_0380;msp_0393;msp_0422;msp_0431;msp_0435;msp_0471;msp_0507;msp_0550;msp_0612;msp_0650;msp_0662;msp_0665;msp…	[Clostridium] bolteae;[Clostridium] clostridioforme 1;Klebsiella pneumoniae;unclassified Lachnoclostridium;[Eubacterium] siraeum;unclassified Lachnoclostridium;[Clostridium] sp. AT4;[Clostridium] sp. CAG:7;[Clostridium] symbiosum;[Clostridium] innocuum;[Clostridium] sp. CAG:58;Klebsiella oxytoca;Klebsiella aerogenes;Klebsiella quasipneumoniae;Blautia coccoides == Blautia producta;[Clostridium] sp…	-	-	K15599;K15600;K15598	-	-	-	-	-	-	-	K15599;K15600;K15598
CL-132	10	72	Yes	No	msp_0062;msp_0088;msp_0090;msp_0104;msp_0117;msp_0121;msp_0144;msp_0151;msp_0173;msp_0184;msp_0191;msp_0192;msp_0213;msp_0216;msp_0234;msp_0266;msp_0276;msp_0299;msp_0306;msp_0315;msp_0364;msp_0392;msp_0472;msp_0476;msp_0477;msp_0534;msp_0555;msp_0574c;msp_0580;msp_0610;msp_0612;msp_0628;msp_0707;msp_0743;msp_0773;msp_0793;msp_0859;msp_0874;msp_0888;msp_1012;msp_1029;msp_1067;msp_1081;msp_1158;ms…	Odoribacter splanchnicus;Butyricimonas sp. Marseille-P3923;Alistipes putredinis;Emergencia timonensis;Butyricimonas sp. Marseille-P4593;Oscillibacter sp. CAG:241_62_21;[Clostridium] sp. CAG:138;Butyricimonas synergistica 2;Christensenellaceae bacterium Phil1 & [Clostridium] sp. CAG:226;Culturomica massiliensis;unclassified Butyricimonas;unclassified Oscillospiraceae;Flavonifractor plautii;Odoriba…	-	-	K18013;K01844;K18011;K01034;K18012;K18014	Lys-AminoMut_A;BKACE;OAM_dimer;LAM_C	-	-	-	-	-	-	K18013;K01844;K18011;Lys-AminoMut_A;K01034;BKACE;OAM_dimer;K18012;K18014;LAM_C
CL-154	3	72	Yes	No	msp_0003;msp_0005;msp_0007;msp_0008;msp_0011;msp_0012;msp_0019;msp_0022;msp_0023;msp_0027;msp_0028;msp_0031;msp_0032;msp_0035;msp_0038;msp_0043;msp_0046;msp_0064;msp_0069;msp_0083;msp_0089;msp_0098;msp_0102;msp_0118;msp_0136;msp_0155;msp_0156;msp_0159;msp_0187;msp_0196;msp_0198;msp_0214;msp_0225;msp_0230;msp_0261;msp_0287;msp_0304;msp_0318;msp_0324;msp_0327;msp_0335;msp_0390;msp_0394;msp_0415;msp…	Bacteroides cellulosilyticus;Escherichia coli;Bacteroides ovatus;Bacteroides intestinalis;Bacteroides thetaiotaomicron;Parabacteroides distasonis;Bacteroides faecis;Bacteroides finegoldii;Bacteroides caccae;Parabacteroides merdae;Parabacteroides goldsteinii;Bacteroides stercoris;Alistipes onderdonkii;Bacteroides dorei;unclassified Lentisphaeria;Bacteroides coprocola;Bacteroides uniformis;unclassi…	-	-	K05340	Sugar_transport;Ureide_permease	-	-	-	-	-	-	Sugar_transport;Ureide_permease;K05340
CL-1436	3	71	Yes	No	msp_0011;msp_0013;msp_0017;msp_0018;msp_0019;msp_0021;msp_0026;msp_0029;msp_0033;msp_0039;msp_0042;msp_0043;msp_0051;msp_0057;msp_0061;msp_0066;msp_0067;msp_0074;msp_0077;msp_0093;msp_0095;msp_0127;msp_0132;msp_0144;msp_0147;msp_0148c;msp_0163;msp_0169;msp_0171;msp_0178;msp_0212;msp_0236;msp_0254;msp_0266;msp_0282;msp_0286;msp_0331;msp_0342;msp_0378;msp_0383;msp_0405;msp_0420;msp_0427;msp_0443;ms…	Bacteroides thetaiotaomicron;Ruminococcus bicirculans;Roseburia intestinalis;Eisenbergiella massiliensis;Bacteroides faecis;Bacteroides xylanisolvens;Paraprevotella clara;[Eubacterium] eligens;Bacteroides fragilis 2;Lachnospiraceae bacterium hRUG904 / Clostridiales bacterium RUG495 / [Clostridium] sp. CAG:127;Coprococcus eutactus 2;Bacteroides coprocola;unclassified Muribaculaceae;Roseburia sp. C…	-	-	-	SUKH_5;SUKH_6;SMI1_KNR4	-	-	-	-	-	-	SUKH_5;SUKH_6;SMI1_KNR4
CL-159	3	70	Yes	No	msp_0025;msp_0038;msp_0070;msp_0073;msp_0099;msp_0116;msp_0120;msp_0130;msp_0159;msp_0201;msp_0253;msp_0255;msp_0266;msp_0289;msp_0328;msp_0338;msp_0411;msp_0455;msp_0465;msp_0503;msp_0516;msp_0532;msp_0557;msp_0564;msp_0574c;msp_0580;msp_0610;msp_0620;msp_0642;msp_0660;msp_0672;msp_0695;msp_0775;msp_0782;msp_0788;msp_0819;msp_0824;msp_0838;msp_0844c;msp_0882c;msp_0897;msp_0909;msp_0915c;msp_0936…	Akkermansia muciniphila;unclassified Lentisphaeria;Akkermansia muciniphila 2;Victivallales bacterium CCUG 44730;Lentisphaeria bacterium UBA1829;unclassified Lentisphaeria;unclassified Victivallales;Candidatus Gastranaerophilales bacterium x14;Victivallis vadensis;Akkermansia sp. KLE1605;unclassified Bilophila;unclassified Victivallales;Fusobacterium ulcerans;Fusobacterium varium;[Brachyspira] sp.…	-	-	K02453;K09778	DUF374	-	-	-	-	-	-	DUF374;K02453;K09778
CL-272	8	68	Yes	No	msp_0005;msp_0082c;msp_0092;msp_0110;msp_0145;msp_0202;msp_0226;msp_0239;msp_0280;msp_0288;msp_0295;msp_0386;msp_0414;msp_0466;msp_0474;msp_0573;msp_0617;msp_0618;msp_0626;msp_0638;msp_0666;msp_0677c;msp_0724;msp_0749;msp_0768;msp_0794;msp_0801;msp_0881;msp_0919;msp_0937;msp_0946;msp_0954;msp_1009;msp_1092;msp_1339;msp_1794;msp_1823;msp_1958;msp_0157;msp_0195;msp_0369;msp_0603c;msp_0633;msp_0715c…	Escherichia coli;Providencia rettgeri 2;Sutterella wadsworthensis 1;Bilophila wadsworthia;Parasutterella excrementihominis;[Acinetobacter] sp. N54.MGS-139 / Proteobacteria bacterium CAG:139;Desulfovibrionaceae bacterium CIM:MAG 900;Sutterellaceae bacterium 4NBBH2;Sutterella wadsworthensis 2;unclassified Sutterellaceae;Desulfovibrio fairfieldensis;unclassified Sutterellaceae;Duodenibacillus massil…	M00259:Heme transport system	ABC-2 type and other transport systems	K02193;K02194;K02197	CcmF_C;NrfD;CcmB;CcmE;Cytochrom_c3_2	-	-	-	-	-	-	CcmF_C;NrfD;K02193;K02194;K02197;CcmB;CcmE;Cytochrom_c3_2
CL-101	17	66	Yes	No	msp_0512;msp_0779;msp_0985;msp_1042;msp_1066;msp_1110;msp_1112;msp_1160;msp_1180;msp_1201;msp_1204;msp_1211;msp_1221;msp_1285;msp_1290;msp_1322;msp_0748;msp_0818;msp_1043;msp_1047;msp_1068;msp_1103;msp_1113c;msp_1138;msp_1162;msp_1212;msp_1214;msp_1231;msp_1233;msp_1243;msp_1313;msp_1333;msp_1354;msp_1392;msp_1852;msp_2048;msp_0858;msp_1027;msp_1049;msp_1122;msp_1141;msp_1170;msp_1247;msp_1275;ms…	[Firmicutes] bacterium CAG:321;[Clostridium] sp. CAG:417;[Mycoplasma] sp. CAG:472;unclassified_RF39_Mollicutes;unclassified_RF39_Mollicutes;[Coprobacillus] sp. CAG:605;[Mycoplasma] sp. CAG:956;[Clostridiaceae] bacterium CIM:MAG 987 / [Clostridium] sp. CAG:533;unclassified_RF39_Mollicutes;unclassified_RF39_Mollicutes;[Bacilli] bacterium Phil2;[Clostridium] sp. CAG:762;[Mycoplasma] sp. CAG:776;uncl…	-	-	K08724;K21465;K06328;K01994;K06305;K02250	CotE;Spore-coat_CotZ;ComK;DUF5411;SirA;Spore_GerQ;SpoVIF;YlbD_coat;Post_transc_reg;Spore_Cse60;YlbE	-	-	-	-	-	-	K08724;K21465;K06328;CotE;Spore-coat_CotZ;K01994;K06305;ComK;DUF5411;SirA;Spore_GerQ;SpoVIF;YlbD_coat;K02250;Post_transc_reg;Spore_Cse60;YlbE
CL-130	11	65	Yes	No	msp_0586;msp_0845;msp_0856;msp_0947;msp_0961;msp_1069;msp_1135;msp_1139;msp_1176;msp_1179;msp_1185;msp_1189;msp_1235;msp_1253;msp_1260;msp_1261;msp_1269;msp_1283;msp_1324;msp_1343;msp_1372;msp_1376;msp_1454;msp_1535;msp_0222;msp_0302;msp_0546;msp_0578;msp_0685;msp_0757;msp_0964;msp_0993;msp_1004;msp_1033;msp_1037;msp_1054;msp_1093;msp_1109;msp_1129;msp_1134;msp_1175;msp_1198;msp_1206;msp_1262;msp…	[Clostridium] sp. CAG:343;[Clostridium] sp. CAG:440;[Clostridium] sp. 28_17 & CAG:470;[Clostridium] sp. 26_22;unclassified Clostridiales 2;unclassified Clostridiales 2;unclassified Clostridiales 2;[Clostridium] sp. CAG:389;unclassified Clostridiales 2;unclassified Clostridiales 2;unclassified Clostridiales 2;unclassified Clostridiales 2;unclassified Clostridiales 2;unclassified Clostridiales 2;[C…	-	-	K01178;K09942	CBM_25;CBM53;DUF1957;DUF2651;DUF4912;Glyco_hydro_15;DUF600	-	cazy.GH15;cazy.CBM25	-	-	-	-	cazy.GH15;K01178;K09942;CBM_25;CBM53;DUF1957;DUF2651;DUF4912;Glyco_hydro_15;cazy.CBM25;DUF600
CL-175	3	65	Yes	No	msp_0005;msp_0012;msp_0030;msp_0082c;msp_0092;msp_0100;msp_0108;msp_0134;msp_0140;msp_0145;msp_0157;msp_0167c;msp_0174;msp_0202;msp_0209;msp_0228;msp_0239;msp_0241;msp_0280;msp_0288;msp_0341;msp_0368c;msp_0386;msp_0414;msp_0466;msp_0474;msp_0544c;msp_0616;msp_0617;msp_0618;msp_0626;msp_0633;msp_0675;msp_0724;msp_0738;msp_0741;msp_0749;msp_0768;msp_0801;msp_0844c;msp_0865;msp_0881;msp_0894;msp_091…	Escherichia coli;Parabacteroides distasonis;Klebsiella pneumoniae;Providencia rettgeri 2;Sutterella wadsworthensis 1;Morganella morganii;Enterobacter hormaechei;Megamonas funiformis == rupellensis;Klebsiella oxytoca;Parasutterella excrementihominis;Klebsiella aerogenes;Plesiomonas shigelloides;Klebsiella quasipneumoniae;[Acinetobacter] sp. N54.MGS-139 / Proteobacteria bacterium CAG:139;Enterobact…	-	-	K07791;K07792	DcuA_DcuB	-	-	-	-	-	-	DcuA_DcuB;K07791;K07792
CL-602	3	64	Yes	No	msp_0005;msp_0030;msp_0082c;msp_0108;msp_0119;msp_0140;msp_0146c;msp_0148c;msp_0157;msp_0174;msp_0209;msp_0228;msp_0280;msp_0313;msp_0338;msp_0347;msp_0362;msp_0368c;msp_0380;msp_0403;msp_0422;msp_0454;msp_0483;msp_0497;msp_0515;msp_0544c;msp_0621;msp_0626;msp_0671;msp_0715c;msp_0742;msp_0792;msp_0832;msp_0833;msp_0853c;msp_0860;msp_0865;msp_0881;msp_0884;msp_0923;msp_0974c;msp_0983;msp_1127;msp_…	Escherichia coli;Klebsiella pneumoniae;Providencia rettgeri 2;Enterobacter hormaechei;unclassified Acidaminococcaceae;Klebsiella oxytoca;Streptococcus sanguinis;Veillonella infantium;Klebsiella aerogenes;Klebsiella quasipneumoniae;Enterobacter roggenkampii;Proteus mirabilis;Sutterella wadsworthensis 2;Veillonella parvula;Fusobacterium mortiferum;Clostridium paraputrificum;Clostridium saudiense;Ae…	-	-	K06193	PhnA;PhnA_Zn_Ribbon	-	-	-	-	-	-	PhnA;PhnA_Zn_Ribbon;K06193
CL-153	3	63	Yes	No	msp_0009;msp_0024;msp_0030;msp_0049;msp_0056;msp_0082c;msp_0086;msp_0100;msp_0104;msp_0109;msp_0134;msp_0135;msp_0140;msp_0142;msp_0152;msp_0154;msp_0160;msp_0169;msp_0174;msp_0232;msp_0244;msp_0259;msp_0289;msp_0297;msp_0303;msp_0317;msp_0329;msp_0333;msp_0341;msp_0392;msp_0408;msp_0452;msp_0464;msp_0473c;msp_0490;msp_0536;msp_0541;msp_0563;msp_0633;msp_0640;msp_0648;msp_0674;msp_0689;msp_0706;m…	[Clostridium] bolteae;Hungatella effluvii;Klebsiella pneumoniae;unclassified Lachnoclostridium;unclassified Lachnoclostridium;Providencia rettgeri 2;[Clostridium] symbiosum;Morganella morganii;Emergencia timonensis;[Clostridium] scindens 2;Megamonas funiformis == rupellensis;[Clostridium] clostridioforme 2;Klebsiella oxytoca;Blautia sp. CAG:52 & SG-772 & sp. 2789STDY5834917;[Ruminococcus] faecis;…	-	-	K10974;K03457	Transp_cyt_pur	-	-	-	-	-	-	Transp_cyt_pur;K10974;K03457
CL-280	3	63	Yes	No	msp_0003;msp_0007;msp_0008;msp_0011;msp_0016;msp_0019;msp_0021;msp_0022;msp_0023;msp_0031;msp_0036;msp_0037;msp_0054;msp_0061;msp_0063;msp_0101;msp_0102;msp_0118;msp_0139;msp_0149;msp_0176;msp_0183;msp_0187;msp_0190;msp_0196;msp_0198;msp_0211;msp_0217;msp_0219;msp_0228;msp_0267;msp_0276;msp_0293;msp_0326;msp_0336;msp_0355;msp_0363;msp_0417;msp_0439;msp_0460;msp_0485;msp_0508;msp_0520c;msp_0580;ms…	Bacteroides cellulosilyticus;Bacteroides ovatus;Bacteroides intestinalis;Bacteroides thetaiotaomicron;Bacteroides plebeius;Bacteroides faecis;Bacteroides xylanisolvens;Bacteroides finegoldii;Bacteroides caccae;Bacteroides stercoris;Bacteroides eggerthii;Bacteroides salyersiae;Bacteroides nordii;Bacteroides congonensis;Bacteroides clarus;Bacteroides sp. CAG:875 & sp. 2789STDY5834845;unclassified B…	-	-	K08961	Lyase_catalyt;Lyase_N	-	-	-	-	-	-	Lyase_catalyt;Lyase_N;K08961
CL-184	3	62	Yes	No	msp_0003;msp_0007;msp_0008;msp_0010;msp_0011;msp_0012;msp_0014;msp_0016;msp_0019;msp_0021;msp_0022;msp_0027;msp_0028;msp_0032;msp_0033;msp_0043;msp_0046;msp_0054;msp_0059;msp_0063;msp_0083;msp_0089;msp_0096;msp_0098;msp_0118;msp_0125;msp_0143;msp_0156;msp_0170;msp_0214;msp_0235;msp_0257;msp_0260;msp_0264;msp_0267;msp_0310;msp_0316;msp_0320;msp_0326;msp_0336;msp_0381;msp_0439;msp_0443;msp_0460;msp…	Bacteroides cellulosilyticus;Bacteroides ovatus;Bacteroides intestinalis;Bacteroides fragilis 1;Bacteroides thetaiotaomicron;Parabacteroides distasonis;Eisenbergiella tayi;Bacteroides plebeius;Bacteroides faecis;Bacteroides xylanisolvens;Bacteroides finegoldii;Parabacteroides merdae;Parabacteroides goldsteinii;Alistipes onderdonkii;Bacteroides fragilis 2;Bacteroides coprocola;Bacteroides uniformi…	-	-	K08257	Glyco_hydro_76	-	cazy.GH76	-	-	-	-	K08257;Glyco_hydro_76;cazy.GH76
CL-313	3	61	Yes	No	msp_0016;msp_0047;msp_0048;msp_0062;msp_0090;msp_0105;msp_0131;msp_0145;msp_0148c;msp_0197;msp_0212;msp_0215;msp_0221;msp_0228;msp_0239;msp_0245;msp_0280;msp_0313;msp_0359;msp_0366;msp_0406;msp_0409;msp_0413;msp_0474;msp_0482;msp_0483;msp_0488;msp_0544c;msp_0574c;msp_0610;msp_0649;msp_0659;msp_0742;msp_0744;msp_0834;msp_0846;msp_0869;msp_0881;msp_0884;msp_0923;msp_0926;msp_0956;msp_0963c;msp_0968…	Bacteroides plebeius;[Eubacterium] sp. CAG:115;[Eubacterium] sp. CAG:38;Odoribacter splanchnicus;Alistipes putredinis;Ruminococcus sp. CAG:177;Phascolarctobacterium faecium;Parasutterella excrementihominis;Veillonella infantium;Megasphaera sp. BL7 & NM10;Dialister invisus;Dialister sp. Marseille-P5638 & CAG:357;Acidaminococcus intestini;Proteus mirabilis;Sutterellaceae bacterium 4NBBH2;Megasphaer…	-	-	-	YadA_anchor;YadA_head;YadA_stalk	-	-	-	-	-	-	YadA_anchor;YadA_head;YadA_stalk
CL-445	5	60	Yes	No	msp_0029;msp_0042;msp_0050;msp_0133;msp_0142;msp_0163;msp_0175;msp_0179;msp_0206;msp_0207;msp_0222;msp_0223;msp_0227;msp_0243;msp_0333;msp_0372;msp_0376;msp_0450;msp_0493;msp_0542;msp_0580;msp_0585;msp_0752;msp_0757;msp_0797;msp_0869;msp_0896;msp_0907;msp_0961;msp_1033;msp_1044;msp_1069;msp_1081;msp_1129;msp_1139;msp_1181;msp_1233;msp_0039;msp_0043;msp_0065;msp_0087;msp_0095;msp_0198;msp_0294;msp…	[Eubacterium] eligens;Coprococcus eutactus 2;Anaerobutyricum hallii;Coprococcus sp. 2789STDY5608819 / [Clostridium] sp. CAG:264;Blautia sp. CAG:52 & SG-772 & sp. 2789STDY5834917;Firmicutes bacterium CAG:227;Lachnospiraceae bacterium TF01-11 / [Clostridium] sp. CAG:122;Coprococcus eutactus 1;Butyrivibrio crossotus;[Roseburia] sp. CAG:380;[Clostridium] sp. CAG:354_28_25;[Clostridium] sp. L2-50;[Eub…	-	-	K19088;K19090;K19075	DevR;Cas_CXXC_CXXC	-	-	-	-	-	-	K19088;K19090;DevR;K19075;Cas_CXXC_CXXC
CL-578	3	60	Yes	No	msp_0005;msp_0007;msp_0010;msp_0011;msp_0012;msp_0019;msp_0021;msp_0022;msp_0023;msp_0027;msp_0028;msp_0030;msp_0031;msp_0033;msp_0037;msp_0038;msp_0040;msp_0043;msp_0054;msp_0063;msp_0069;msp_0073;msp_0082c;msp_0097;msp_0098;msp_0100;msp_0108;msp_0118;msp_0131;msp_0140;msp_0156;msp_0157;msp_0159;msp_0198;msp_0209;msp_0221;msp_0228;msp_0241;msp_0256;msp_0267;msp_0316;msp_0341;msp_0409;msp_0413;ms…	Escherichia coli;Bacteroides ovatus;Bacteroides fragilis 1;Bacteroides thetaiotaomicron;Parabacteroides distasonis;Bacteroides faecis;Bacteroides xylanisolvens;Bacteroides finegoldii;Bacteroides caccae;Parabacteroides merdae;Parabacteroides goldsteinii;Klebsiella pneumoniae;Bacteroides stercoris;Bacteroides fragilis 2;Bacteroides salyersiae;unclassified Lentisphaeria;Bacteroides massiliensis;Bact…	-	-	K02001;K02002;K02000	-	-	-	-	-	-	-	K02001;K02002;K02000
CL-304	3	59	Yes	No	msp_0015;msp_0017;msp_0024;msp_0034;msp_0048;msp_0060;msp_0066;msp_0071;msp_0074;msp_0075;msp_0077;msp_0079;msp_0129;msp_0131;msp_0134;msp_0147;msp_0150c;msp_0153;msp_0173;msp_0175;msp_0177;msp_0200;msp_0204;msp_0210;msp_0212;msp_0215;msp_0221;msp_0234;msp_0236;msp_0238;msp_0242;msp_0243;msp_0245;msp_0258;msp_0270;msp_0286;msp_0296;msp_0297;msp_0305;msp_0338;msp_0357;msp_0364;msp_0376;msp_0378;ms…	Roseburia faecis;Roseburia intestinalis;Hungatella effluvii;[Faecalibacterium] sp. CAG:74;[Eubacterium] sp. CAG:38;Lachnospiraceae bacterium CIM:MAG 844 / Firmicutes bacterium CAG:95;[Clostridium] sp. AT4;Roseburia hominis;Roseburia sp. CAG:100 / Lachnospiraceae bacterium CIM:MAG 54;Lachnospiraceae bacterium GAM79 / [Clostridium] sp. CAG:91 & sp. 2789STDY5834873;unclassified Lachnospiraceae;[Clos…	-	-	-	DUF2634;Phage_TAC_5;DUF2001	-	-	-	-	-	-	DUF2634;Phage_TAC_5;DUF2001
CL-503	3	59	Yes	No	msp_0009;msp_0010;msp_0011;msp_0014;msp_0016;msp_0018;msp_0019;msp_0020;msp_0022;msp_0023;msp_0025;msp_0028;msp_0033;msp_0037;msp_0049;msp_0054;msp_0060;msp_0070;msp_0083;msp_0098;msp_0124;msp_0125;msp_0152;msp_0185;msp_0194;msp_0198;msp_0201;msp_0264;msp_0312;msp_0328;msp_0360;msp_0370;msp_0373;msp_0395;msp_0411;msp_0428;msp_0443;msp_0557;msp_0565;msp_0594;msp_0608;msp_0614;msp_0639;msp_0795;msp…	[Clostridium] bolteae;Bacteroides fragilis 1;Bacteroides thetaiotaomicron;Eisenbergiella tayi;Bacteroides plebeius;Eisenbergiella massiliensis;Bacteroides faecis;[Clostridium] clostridioforme 1;Bacteroides finegoldii;Bacteroides caccae;Akkermansia muciniphila;Parabacteroides goldsteinii;Bacteroides fragilis 2;Bacteroides salyersiae;unclassified Lachnoclostridium;Bacteroides nordii;Lachnospiraceae…	-	-	K20151	Glyco_transf_10	-	cazy.GT10	-	-	-	-	K20151;Glyco_transf_10;cazy.GT10
CL-582	3	59	Yes	No	msp_0005;msp_0009;msp_0020;msp_0056;msp_0058;msp_0066;msp_0082c;msp_0100;msp_0103;msp_0108;msp_0126;msp_0157;msp_0160;msp_0228;msp_0231;msp_0278;msp_0289;msp_0329;msp_0334;msp_0338;msp_0347;msp_0388;msp_0422;msp_0479;msp_0497;msp_0500;msp_0515;msp_0587;msp_0648;msp_0662;msp_0671;msp_0698;msp_0750;msp_0770;msp_0785;msp_0814;msp_0831;msp_0852;msp_0853c;msp_0883;msp_0938;msp_0946;msp_0949;msp_0952;m…	Escherichia coli;[Clostridium] bolteae;[Clostridium] clostridioforme 1;unclassified Lachnoclostridium;[Ruminococcus] gnavus;[Clostridium] sp. AT4;Providencia rettgeri 2;Morganella morganii;[Clostridium] innocuum;Enterobacter hormaechei;[Ruminococcus] torques;Klebsiella aerogenes;[Faecalitalea] sp. UBA637;Proteus mirabilis;unclassified_Erysipelotrichaceae;Erysipelotrichaceae bacterium 3_1_53;Fusob…	M00117:Ubiquinone biosynthesis, prokaryotes, chorismate => ubiquinone	Cofactor and vitamin biosynthesis	K02746;K02747;K02745	-	-	-	-	-	-	-	K02746;K02747;K02745
CL-372	8	58	Yes	No	msp_0009;msp_0020;msp_0086;msp_0109;msp_0110;msp_0111;msp_0129;msp_0173;msp_0186;msp_0193;msp_0195;msp_0203;msp_0232;msp_0234;msp_0259;msp_0274;msp_0279;msp_0295;msp_0307;msp_0308;msp_0357;msp_0379;msp_0395;msp_0398;msp_0409;msp_0446c;msp_0462;msp_0472;msp_0477;msp_0494;msp_0506;msp_0524;msp_0544c;msp_0552;msp_0604;msp_0631;msp_0678;msp_0706;msp_0737;msp_0793;msp_0846;msp_0935;msp_0965;msp_0974c;…	[Clostridium] bolteae;[Clostridium] clostridioforme 1;[Clostridium] symbiosum;[Clostridium] scindens 2;Bilophila wadsworthia;Faecalimonas umbilicata;[Clostridium] sp. CAG:58;Christensenellaceae bacterium Phil1 & [Clostridium] sp. CAG:226;[Clostridium] sp. CAG:299;[Clostridium] scindens 1;Desulfovibrio piger;Negativibacillus massiliensis;Dorea sp. CAG:317;Catabacter sp. UBA1685 / Clostridia bacter…	-	-	K10671;K21576;K21577;K10670;K10672	GRDA;Gly_reductase;GRDB	-	-	-	-	-	-	K10671;K21576;K21577;GRDA;K10670;K10672;Gly_reductase;GRDB
CL-179	3	58	Yes	No	msp_0017;msp_0034;msp_0047;msp_0050;msp_0076;msp_0094;msp_0112;msp_0162;msp_0163;msp_0164;msp_0165;msp_0169;msp_0175;msp_0189;msp_0243;msp_0272;msp_0296;msp_0305;msp_0321;msp_0323;msp_0331;msp_0362;msp_0370;msp_0371;msp_0427;msp_0433;msp_0435;msp_0444;msp_0454;msp_0489;msp_0496;msp_0505;msp_0507;msp_0522;msp_0558;msp_0559;msp_0621;msp_0670;msp_0752;msp_0760;msp_0860;msp_0885;msp_1032;msp_1070;msp…	Roseburia intestinalis;[Faecalibacterium] sp. CAG:74;[Eubacterium] sp. CAG:115;Anaerobutyricum hallii;Blautia wexlerae;unclassified Roseburia;Blautia hydrogenotrophica;unclassified Blautia;Firmicutes bacterium CAG:227;[Ruminococcus] sp. 2789STDY5608794 & sp. 2789STDY5834890 / Firmicutes bacterium CAG:56;unclassified Lachnospiraceae;Roseburia sp. CAG:197;Lachnospiraceae bacterium TF01-11 / [Clostr…	-	-	K05795	TerD;YceG_bac	-	-	-	-	-	-	TerD;K05795;YceG_bac
CL-616	3	58	Yes	No	msp_0009;msp_0020;msp_0024;msp_0030;msp_0044;msp_0049;msp_0066;msp_0071;msp_0072;msp_0074;msp_0075;msp_0079;msp_0108;msp_0124;msp_0135;msp_0140;msp_0181;msp_0233;msp_0254;msp_0265;msp_0301;msp_0338;msp_0341;msp_0345;msp_0354;msp_0360;msp_0374;msp_0388;msp_0389;msp_0397;msp_0399;msp_0402;msp_0418;msp_0451;msp_0457;msp_0484;msp_0510;msp_0559;msp_0580;msp_0591;msp_0592;msp_0622;msp_0639;msp_0690;msp…	[Clostridium] bolteae;[Clostridium] clostridioforme 1;Hungatella effluvii;Klebsiella pneumoniae;Hungatella hathewayi 1;unclassified Lachnoclostridium;[Clostridium] sp. AT4;Roseburia hominis;Roseburia inulinivorans;Roseburia sp. CAG:100 / Lachnospiraceae bacterium CIM:MAG 54;Lachnospiraceae bacterium GAM79 / [Clostridium] sp. CAG:91 & sp. 2789STDY5834873;[Clostridium] sp. CAG:7;Enterobacter hormae…	M00202:Oligogalacturonide transport system	Saccharide, polyol, and lipid transport system	K10193;K10194;K10192	-	-	-	-	-	-	-	K10193;K10194;K10192
CL-128	7	57	Yes	No	msp_0132;msp_0153;msp_0160;msp_0281;msp_0333;msp_0408;msp_0458;msp_0479;msp_0500;msp_0600c;msp_0691;msp_0698;msp_0712;msp_0831;msp_0843;msp_0852;msp_0853c;msp_0890c;msp_0938;msp_1006;msp_1089;msp_1222;msp_1237;msp_1265;msp_0103;msp_0146c;msp_0188;msp_0278;msp_0334;msp_0380;msp_0403;msp_0486;msp_0497;msp_0602c;msp_0623;msp_0648;msp_0742;msp_0828;msp_0832;msp_0833;msp_0925;msp_0974c;msp_0981;msp_09…	Coprobacillus cateniformis;Erysipelatoclostridium ramosum;[Faecalitalea] sp. UBA637;Catenibacterium sp. CAG:290;Lactobacillus ruminis;Lactobacillus mucosae;Catenibacterium mitsuokai;[Eubacterium] sp. Marseille-P5640;unclassified_Erysipelotrichaceae;Weissella cibaria;Lactobacillus amylovorus;Faecalitalea cylindroides;Lactobacillus salivarius;Faecalicoccus pleomorphus;Weissella confusa;Absiella dol…	M00429:Competence-related DNA transformation transporter	Bacterial secretion system	K02243;K02245;K18692;K16509;K02240;K09976	CamS	-	-	-	-	-	-	K02243;K02245;K18692;K16509;K02240;CamS;K09976
CL-412	5	57	Yes	No	msp_0030;msp_0096;msp_0101;msp_0145;msp_0165;msp_0166;msp_0181;msp_0263;msp_0271;msp_0272;msp_0419;msp_0488;msp_0559;msp_0570;msp_0594;msp_0595;msp_0618;msp_0627;msp_0695;msp_0718;msp_0724;msp_0741;msp_0758;msp_0840;msp_0878;msp_0895;msp_0927;msp_0992;msp_1131;msp_1140;msp_1154;msp_1399;msp_1880;msp_0341;msp_0365;msp_0369;msp_0386;msp_0405;msp_0469c;msp_0562;msp_0750;msp_0780;msp_0954;msp_1048;ms…	Klebsiella pneumoniae;Bacteroides sp. CAG:443;Bacteroides sp. CAG:875 & sp. 2789STDY5834845;Parasutterella excrementihominis;unclassified Lachnospiraceae;Bifidobacterium longum;unclassified Marvinbryantia;Bifidobacterium adolescentis;[Eubacterium] sp. CAG:180;unclassified Blautia;Bifidobacterium bifidum;Acidaminococcus massiliensis;unclassified Lachnoclostridium;Bifidobacterium dentium;Phascolarc…	-	-	K06048	Alpha-E;CP_ATPgrasp_1;CP_ATPgrasp_2;Bact_transglu_N	-	-	-	-	-	-	Alpha-E;CP_ATPgrasp_1;CP_ATPgrasp_2;K06048;Bact_transglu_N
CL-457	5	57	Yes	No	msp_0100;msp_0140;msp_0144;msp_0163;msp_0171;msp_0180;msp_0182;msp_0203;msp_0205;msp_0218;msp_0234;msp_0266;msp_0268;msp_0270;msp_0309;msp_0338;msp_0357;msp_0384;msp_0404;msp_0424;msp_0453;msp_0462;msp_0544c;msp_0580;msp_0596;msp_0626;msp_0631;msp_0678;msp_0737;msp_0901;msp_0956;msp_0975;msp_1028c;msp_1029;msp_1123;msp_1145;msp_1158;msp_1169c;msp_1192;msp_1432;msp_1433;msp_1559c;msp_1674;msp_1861…	Morganella morganii;Klebsiella oxytoca;[Clostridium] sp. CAG:138;Firmicutes bacterium CAG:227;Blautia hansenii;Blautia coccoides == Blautia producta;Firmicutes bacterium CAG:424;Negativibacillus massiliensis;Firmicutes bacterium CAG:124;unclassified Christensenellaceae-Catabacteriaceae;Catabacter sp. UBA1685 / Clostridia bacterium CIM:MAG 110_1;Fusobacterium ulcerans;Blautia sp. N6H1-15;unclassif…	-	-	K04835;K19268;K01846	MAAL_N;Met_asp_mut_E	-	-	-	-	-	-	K04835;K19268;MAAL_N;Met_asp_mut_E;K01846
CL-541	5	56	Yes	No	msp_0005;msp_0030;msp_0066;msp_0079;msp_0092;msp_0100;msp_0110;msp_0129;msp_0134;msp_0140;msp_0146c;msp_0157;msp_0174;msp_0195;msp_0228;msp_0242;msp_0266;msp_0280;msp_0288;msp_0329;msp_0338;msp_0341;msp_0342;msp_0346;msp_0386;msp_0466;msp_0580;msp_0587;msp_0591;msp_0594;msp_0610;msp_0617;msp_0633;msp_0649;msp_0705;msp_0713;msp_0770;msp_0820;msp_0860;msp_0906;msp_1076;msp_1432;msp_1639;msp_1838;ms…	Escherichia coli;Klebsiella pneumoniae;[Clostridium] sp. AT4;[Clostridium] sp. CAG:7;Sutterella wadsworthensis 1;Morganella morganii;Bilophila wadsworthia;[Clostridium] sp. CAG:58;Megamonas funiformis == rupellensis;Klebsiella oxytoca;Streptococcus sanguinis;Klebsiella aerogenes;Klebsiella quasipneumoniae;Desulfovibrio piger;Proteus mirabilis;Anaerotignum lactatifermentans;Fusobacterium ulcerans;…	-	-	K15584;K15585;K15586;K15587;K10824	-	-	-	-	-	-	-	K15584;K15585;K15586;K15587;K10824
CL-655	4	56	Yes	No	msp_0009;msp_0024;msp_0030;msp_0044;msp_0049;msp_0056;msp_0058;msp_0068;msp_0103;msp_0107;msp_0133;msp_0140;msp_0153;msp_0160;msp_0174;msp_0200;msp_0223;msp_0241;msp_0278;msp_0281;msp_0334;msp_0403;msp_0458;msp_0473c;msp_0497;msp_0551;msp_0562;msp_0580;msp_0587;msp_0632;msp_0648;msp_0655;msp_0785;msp_0946;msp_0981;msp_1244;msp_1421;msp_1533;msp_1700;msp_0126;msp_0132;msp_0231;msp_0289;msp_0360;ms…	[Clostridium] bolteae;Hungatella effluvii;Klebsiella pneumoniae;Hungatella hathewayi 1;unclassified Lachnoclostridium;unclassified Lachnoclostridium;[Ruminococcus] gnavus;[Eubacterium] rectale;[Clostridium] innocuum;Anaerostipes hadrus 1;Coprococcus sp. 2789STDY5608819 / [Clostridium] sp. CAG:264;Klebsiella oxytoca;Erysipelatoclostridium ramosum;[Faecalitalea] sp. UBA637;Klebsiella quasipneumonia…	-	-	K19507;K19508;K19509;K19506	-	-	-	-	-	-	-	K19507;K19508;K19509;K19506
CL-183	3	56	Yes	No	msp_0005;msp_0030;msp_0082c;msp_0100;msp_0130;msp_0131;msp_0140;msp_0148c;msp_0157;msp_0174;msp_0197;msp_0209;msp_0212;msp_0220;msp_0228;msp_0241;msp_0266;msp_0289;msp_0295;msp_0338;msp_0341;msp_0359;msp_0366;msp_0386;msp_0413;msp_0482;msp_0488;msp_0574c;msp_0587;msp_0594;msp_0603c;msp_0610;msp_0620;msp_0633;msp_0656;msp_0696;msp_0700;msp_0715c;msp_0724;msp_0844c;msp_0884;msp_0923;msp_1081;msp_11…	Escherichia coli;Klebsiella pneumoniae;Providencia rettgeri 2;Morganella morganii;Candidatus Gastranaerophilales bacterium x14;Phascolarctobacterium faecium;Klebsiella oxytoca;Veillonella infantium;Klebsiella aerogenes;Klebsiella quasipneumoniae;Megasphaera sp. BL7 & NM10;Enterobacter roggenkampii;Dialister invisus;Azospirillum sp. 51_20;Proteus mirabilis;Klebsiella variicola;Fusobacterium ulcera…	M00168:CAM (Crassulacean acid metabolism), dark ;M00173:Reductive citrate cycle (Arnon-Buchanan cycle) ;M00374:Dicarboxylate-hydroxybutyrate cycle ;M00346:Formaldehyde assimilation, serine pathway	Carbon fixation;Methane metabolism	K07326	Haemagg_act;ShlB	-	-	-	-	-	-	Haemagg_act;ShlB;K07326
CL-190	3	56	Yes	No	msp_0009;msp_0013;msp_0014;msp_0020;msp_0045;msp_0049;msp_0058;msp_0095;msp_0111;msp_0124;msp_0125;msp_0126;msp_0132;msp_0135;msp_0144;msp_0172;msp_0178;msp_0179;msp_0188;msp_0203;msp_0210;msp_0213;msp_0223;msp_0234;msp_0249;msp_0258;msp_0262;msp_0282;msp_0286;msp_0290;msp_0291;msp_0342;msp_0410;msp_0462;msp_0468;msp_0471;msp_0481;msp_0619;msp_0666;msp_0701;msp_0757;msp_0763;msp_0791;msp_0792;msp…	[Clostridium] bolteae;Ruminococcus bicirculans;Eisenbergiella tayi;[Clostridium] clostridioforme 1;Ruminococcus bromii 2;unclassified Lachnoclostridium;[Ruminococcus] gnavus;unclassified Ruminococcaceae;Faecalimonas umbilicata;Candidatus Cibiobacter qucibialis;Firmicutes bacterium CAG:24 / [Clostridium] sp. 2789STDY5834869 & 2789STDY5834922;[Ruminococcus] torques;Coprobacillus cateniformis;[Clost…	M00270:PTS system, trehalose-specific II component	Phosphotransferase system (PTS)	K00682	AIG2_2;GGACT	-	-	-	-	-	-	AIG2_2;GGACT;K00682
CL-654	4	55	Yes	No	msp_0044;msp_0066;msp_0071;msp_0077;msp_0079;msp_0138;msp_0146c;msp_0212;msp_0215;msp_0221;msp_0241;msp_0245;msp_0321;msp_0366;msp_0380;msp_0383;msp_0406;msp_0408;msp_0426;msp_0433;msp_0570;msp_0582;msp_0591;msp_0603c;msp_0627;msp_0649;msp_0659;msp_0742;msp_0832;msp_0834;msp_0890c;msp_0983;msp_1006;msp_1036;msp_1089;msp_1153;msp_1220;msp_1341;msp_1365;msp_1477;msp_1543;msp_1613;msp_1637;msp_1674;…	Hungatella hathewayi 1;[Clostridium] sp. AT4;Roseburia hominis;unclassified Lachnospiraceae;[Clostridium] sp. CAG:7;Bifidobacterium pseudocatenulatum;Streptococcus sanguinis;Dialister invisus;Dialister sp. Marseille-P5638 & CAG:357;Acidaminococcus intestini;Klebsiella variicola;Megasphaera massiliensis;[Clostridium] sp. CAG:411;unclassified Caecibacter;Streptococcus salivarius;Dialister succinati…	M00319:Manganese/zinc/iron transport system	Metallic cation, iron-siderophore and vitamin B12 transport system	K16960;K16958;K16959;K16957	-	-	-	-	-	-	-	K16960;K16958;K16959;K16957
CL-61	3	55	Yes	No	msp_0005;msp_0008;msp_0009;msp_0025;msp_0029;msp_0047;msp_0066;msp_0070;msp_0077;msp_0090;msp_0093;msp_0100;msp_0106;msp_0110;msp_0119;msp_0129;msp_0131;msp_0134;msp_0170;msp_0175;msp_0177;msp_0183;msp_0195;msp_0197;msp_0202;msp_0205;msp_0220;msp_0221;msp_0269;msp_0277;msp_0280;msp_0288;msp_0308;msp_0321;msp_0357;msp_0369;msp_0375;msp_0386;msp_0414;msp_0433;msp_0462;msp_0483;msp_0490;msp_0522;msp…	Escherichia coli;Bacteroides intestinalis;[Clostridium] bolteae;Akkermansia muciniphila;[Eubacterium] eligens;[Eubacterium] sp. CAG:115;[Clostridium] sp. AT4;Akkermansia muciniphila 2;unclassified Lachnospiraceae;Alistipes putredinis;[Clostridium] sp. CAG:62;Morganella morganii;Clostridiales bacterium UBA7273 / Firmicutes bacterium CAG:240;Bilophila wadsworthia;unclassified Acidaminococcaceae;[Cl…	-	-	K21512	Phage_portal_2;Terminase_GpA	-	-	-	-	-	-	Phage_portal_2;Terminase_GpA;K21512
CL-185	3	54	Yes	No	msp_0003;msp_0007;msp_0008;msp_0010;msp_0011;msp_0016;msp_0019;msp_0021;msp_0032;msp_0033;msp_0037;msp_0043;msp_0054;msp_0059;msp_0061;msp_0062;msp_0069;msp_0101;msp_0118;msp_0122;msp_0139;msp_0149;msp_0184;msp_0190;msp_0198;msp_0211;msp_0214;msp_0225;msp_0256;msp_0267;msp_0293;msp_0318;msp_0335;msp_0351;msp_0415;msp_0417;msp_0429;msp_0443;msp_0502;msp_0525;msp_0636;msp_0637;msp_0702;msp_0764;msp…	Bacteroides cellulosilyticus;Bacteroides ovatus;Bacteroides intestinalis;Bacteroides fragilis 1;Bacteroides thetaiotaomicron;Bacteroides plebeius;Bacteroides faecis;Bacteroides xylanisolvens;Alistipes onderdonkii;Bacteroides fragilis 2;Bacteroides salyersiae;Bacteroides coprocola;Bacteroides nordii;Barnesiella intestinihominis;Bacteroides congonensis;Odoribacter splanchnicus;Bacteroides vulgatus;…	-	-	K09939	DUF4857;PepSY_TM_like_2	-	-	-	-	-	-	DUF4857;PepSY_TM_like_2;K09939
CL-696	6	53	Yes	No	msp_0014;msp_0018;msp_0038;msp_0110;msp_0212;msp_0285;msp_0295;msp_0382;msp_0383;msp_0396;msp_0410;msp_0426;msp_0500;msp_0518;msp_0584;msp_0638;msp_0666;msp_0688;msp_0698;msp_0776;msp_0800;msp_0812;msp_0825;msp_0834;msp_0835;msp_0851;msp_0869;msp_0896;msp_0940;msp_0992;msp_1036;msp_1125;msp_1131;msp_1217;msp_0085;msp_0185;msp_0562;msp_0573;msp_0595;msp_0665;msp_0677c;msp_0785;msp_0794;msp_0939;ms…	Eisenbergiella tayi;Eisenbergiella massiliensis;unclassified Lentisphaeria;Bilophila wadsworthia;Dialister invisus;[Clostridium] sp. CAG:217 / Clostridiales bacterium CIM:MAG 317_1;Desulfovibrio fairfieldensis;unclassified Lachnospiraceae;Dialister succinatiphilus;Adlercreutzia equolifaciens;Clostridiales bacterium CIM:MAG 131;Dialister sp. CAG:486;unclassified_Erysipelotrichaceae;unclassified Co…	-	-	K14087;K14088;K14089;K14090;K14091;K14086	-	-	-	-	-	-	-	K14087;K14088;K14089;K14090;K14091;K14086
CL-21	5	51	Yes	No	msp_0013;msp_0086;msp_0115c;msp_0135;msp_0147;msp_0153;msp_0193;msp_0200;msp_0210;msp_0249;msp_0286;msp_0334;msp_0400;msp_0432;msp_0479;msp_0500;msp_0555;msp_0556;msp_0573;msp_0638;msp_0826;msp_0901;msp_0960;msp_0973;msp_1073;msp_1101;msp_1137;msp_1167;msp_1233;msp_1363;msp_1407;msp_1416;msp_1466;msp_1500;msp_1587;msp_1591;msp_1670;msp_1818;msp_0111;msp_0748;msp_1047;msp_1162;msp_1200;msp_1221;ms…	Ruminococcus bicirculans;[Clostridium] symbiosum;Lachnoclostridium phytofermentans 2;[Clostridium] clostridioforme 2;unclassified Ruminococcaceae;Erysipelatoclostridium ramosum;[Clostridium] scindens 1;Anaerostipes caccae;unclassified Ruminococcus;unclassified Ruminococcaceae;Ruminococcus sp. 37_24 & sp. 2789STDY5834934;Erysipelotrichaceae bacterium 5_2_54FAA / [Eubacterium] sp. 3_1_31;unclassifi…	-	-	K10979;K01971	DNA_ligase_A_M;Ku;DNA_ligase_A_C	-	-	-	-	-	-	K10979;DNA_ligase_A_M;Ku;K01971;DNA_ligase_A_C
CL-415	9	50	Yes	No	msp_0013;msp_0030;msp_0039;msp_0053;msp_0079;msp_0093;msp_0138;msp_0144;msp_0145;msp_0173;msp_0195;msp_0239;msp_0252;msp_0255;msp_0262;msp_0288;msp_0333;msp_0357;msp_0386;msp_0409;msp_0445;msp_0457;msp_0474;msp_0482;msp_0484;msp_0591;msp_0656;msp_0732;msp_0879;msp_1057c;msp_1063c;msp_1648;msp_1773;msp_0092;msp_0166;msp_0369;msp_0425;msp_0469c;msp_0662;msp_1114;msp_1196;msp_1223c;msp_1887;msp_1889…	Ruminococcus bicirculans;Klebsiella pneumoniae;Lachnospiraceae bacterium hRUG904 / Clostridiales bacterium RUG495 / [Clostridium] sp. CAG:127;[Eubacterium] siraeum;[Clostridium] sp. CAG:7;[Clostridium] sp. CAG:62;Bifidobacterium pseudocatenulatum;[Clostridium] sp. CAG:138;Parasutterella excrementihominis;Christensenellaceae bacterium Phil1 & [Clostridium] sp. CAG:226;Desulfovibrio piger;Sutterell…	-	-	K19125;K19123;K19126;K19124	Cas_Cas2CT1978;Cas_CT1975;CRISPR_assoc;CRISPR_Cse1;CRISPR_Cse2	-	-	-	-	-	-	K19125;K19123;K19126;Cas_Cas2CT1978;Cas_CT1975;CRISPR_assoc;CRISPR_Cse1;CRISPR_Cse2;K19124
CL-199	3	49	Yes	No	msp_0010;msp_0016;msp_0019;msp_0021;msp_0022;msp_0031;msp_0033;msp_0035;msp_0037;msp_0043;msp_0047;msp_0050;msp_0059;msp_0064;msp_0080;msp_0083;msp_0120;msp_0178;msp_0217;msp_0253;msp_0295;msp_0298;msp_0349;msp_0354;msp_0405;msp_0409;msp_0417;msp_0469c;msp_0476;msp_0531;msp_0545;msp_0549;msp_0651;msp_0733;msp_0752;msp_0767;msp_0880;msp_1012;msp_1079;msp_1089;msp_1190c;msp_1347c;msp_1406;msp_1464;…	Bacteroides fragilis 1;Bacteroides plebeius;Bacteroides faecis;Bacteroides xylanisolvens;Bacteroides finegoldii;Bacteroides stercoris;Bacteroides fragilis 2;Bacteroides dorei;Bacteroides salyersiae;Bacteroides coprocola;[Eubacterium] sp. CAG:115;Anaerobutyricum hallii;Barnesiella intestinihominis;unclassified Bacteroidales [Alistipes] sp. CAG:435;Prevotellamassilia timonensis;Parabacteroides john…	-	-	K07492	DDE_Tnp_1_2;DUF4096	-	-	-	-	-	-	DDE_Tnp_1_2;DUF4096;K07492
CL-510	3	49	Yes	No	msp_0011;msp_0016;msp_0028;msp_0061;msp_0082c;msp_0092;msp_0098;msp_0137;msp_0145;msp_0219;msp_0221;msp_0256;msp_0280;msp_0386;msp_0411;msp_0414;msp_0488;msp_0503;msp_0557;msp_0617;msp_0696;msp_0715c;msp_0744;msp_0749;msp_0768;msp_0801;msp_0813;msp_0844c;msp_0880;msp_0881;msp_0888;msp_0967;msp_0968c;msp_1031;msp_1152;msp_1182;msp_1242;msp_1272;msp_1476;msp_1783;msp_1785;msp_1794;msp_1799;msp_1801…	Bacteroides thetaiotaomicron;Bacteroides plebeius;Parabacteroides goldsteinii;Bacteroides congonensis;Providencia rettgeri 2;Sutterella wadsworthensis 1;Parabacteroides gordonii;unclassified Prevotella;Parasutterella excrementihominis;unclassified Bacteroides;Acidaminococcus intestini;Bacteroides sp. CAG:462 & sp. Marseille-P3684;Sutterella wadsworthensis 2;unclassified Sutterellaceae;unclassifie…	-	-	K07270	Glyco_transf_25	-	cazy.GT25	-	-	-	-	K07270;Glyco_transf_25;cazy.GT25
CL-142	3	48	Yes	No	msp_0009;msp_0020;msp_0030;msp_0044;msp_0056;msp_0079;msp_0109;msp_0134;msp_0157;msp_0174;msp_0195;msp_0221;msp_0226;msp_0240;msp_0241;msp_0245;msp_0254;msp_0269;msp_0314;msp_0341;msp_0350;msp_0366;msp_0406;msp_0440;msp_0544c;msp_0550;msp_0559;msp_0576;msp_0591;msp_0633;msp_0649;msp_0659;msp_0712;msp_0713;msp_0744;msp_0758;msp_0770;msp_0850;msp_0986;msp_1048;msp_1062;msp_1194;msp_1365;msp_1437;ms…	[Clostridium] bolteae;[Clostridium] clostridioforme 1;Klebsiella pneumoniae;Hungatella hathewayi 1;unclassified Lachnoclostridium;[Clostridium] sp. CAG:7;[Clostridium] scindens 2;Megamonas funiformis == rupellensis;Klebsiella aerogenes;Klebsiella quasipneumoniae;Desulfovibrio piger;Acidaminococcus intestini;Desulfovibrionaceae bacterium CIM:MAG 900;unclassified Oscillospiraceae;Klebsiella variico…	-	-	K00020;K00042	NAD_binding_11	-	-	-	-	-	-	NAD_binding_11;K00020;K00042
CL-191	3	48	Yes	No	msp_0082c;msp_0138;msp_0146c;msp_0228;msp_0263;msp_0380;msp_0419;msp_0562;msp_0570;msp_0573;msp_0602c;msp_0627;msp_0662;msp_0691;msp_0742;msp_0832;msp_0833;msp_0881;msp_0890c;msp_0910;msp_0916;msp_0936c;msp_0940;msp_0946;msp_0974c;msp_0983;msp_1059c;msp_1127;msp_1142;msp_1155;msp_1156;msp_1159;msp_1190c;msp_1196;msp_1227c;msp_1244;msp_1265;msp_1268;msp_1287;msp_1341;msp_1453;msp_1477;msp_1543;msp…	Providencia rettgeri 2;Bifidobacterium pseudocatenulatum;Streptococcus sanguinis;Proteus mirabilis;Bifidobacterium adolescentis;Streptococcus salivarius;Bifidobacterium bifidum;Enorma massiliensis;Bifidobacterium dentium;Eggerthella lenta;Streptococcus infantis 2;Bifidobacterium breve;bacterium OL-1;Lactobacillus amylovorus;Streptococcus parasanguinis;Streptococcus pasteurianus;Streptococcus ther…	-	-	K01595	PEPcase;PEPcase_2	-	-	-	-	-	-	PEPcase;PEPcase_2;K01595
CL-579	3	48	Yes	No	msp_0005;msp_0030;msp_0082c;msp_0100;msp_0108;msp_0131;msp_0140;msp_0148c;msp_0157;msp_0174;msp_0197;msp_0209;msp_0221;msp_0241;msp_0245;msp_0366;msp_0406;msp_0413;msp_0488;msp_0501;msp_0544c;msp_0594;msp_0626;msp_0633;msp_0649;msp_0659;msp_0696;msp_0700;msp_0744;msp_0754c;msp_0865;msp_0869;msp_0881;msp_0889;msp_1024;msp_1034;msp_1040c;msp_1325;msp_1331;msp_1476;msp_1691;msp_1766;msp_1794;msp_181…	Escherichia coli;Klebsiella pneumoniae;Providencia rettgeri 2;Morganella morganii;Enterobacter hormaechei;Phascolarctobacterium faecium;Klebsiella oxytoca;Veillonella infantium;Klebsiella aerogenes;Klebsiella quasipneumoniae;Megasphaera sp. BL7 & NM10;Enterobacter roggenkampii;Acidaminococcus intestini;Klebsiella variicola;Megasphaera massiliensis;unclassified Caecibacter;unclassified Veillonella…	-	-	K09824;K02507	DUF535	-	-	-	-	-	-	K09824;DUF535;K02507
CL-580	3	48	Yes	No	msp_0005;msp_0009;msp_0014;msp_0049;msp_0082c;msp_0109;msp_0110;msp_0140;msp_0157;msp_0193;msp_0207;msp_0228;msp_0274;msp_0288;msp_0303;msp_0312;msp_0314;msp_0317;msp_0341;msp_0369;msp_0379;msp_0461;msp_0490;msp_0497;msp_0506;msp_0562;msp_0626;msp_0644;msp_0677c;msp_0701;msp_0720;msp_0732;msp_0820;msp_0900;msp_0922;msp_1098;msp_1159;msp_1239;msp_1319;msp_1331;msp_1332;msp_1353;msp_1432;msp_1508;m…	Escherichia coli;[Clostridium] bolteae;Eisenbergiella tayi;unclassified Lachnoclostridium;Providencia rettgeri 2;[Clostridium] scindens 2;Bilophila wadsworthia;Klebsiella oxytoca;Klebsiella aerogenes;[Clostridium] scindens 1;[Roseburia] sp. CAG:380;Proteus mirabilis;Sellimonas intestinalis == Drancourtella massiliensis;unclassified Sutterellaceae;unclassified Clostridiales 5;Firmicutes bacterium …	M00362:Nucleotide sugar biosynthesis, prokaryotes	Nucleotide sugar	K02381	DUF1116;DUF2877	-	-	-	-	-	-	DUF1116;DUF2877;K02381
CL-348	8	47	Yes	No	msp_0005;msp_0030;msp_0082c;msp_0100;msp_0108;msp_0140;msp_0145;msp_0157;msp_0174;msp_0202;msp_0209;msp_0228;msp_0313;msp_0482;msp_0584;msp_0618;msp_0626;msp_0633;msp_0884;msp_0968c;msp_1331;msp_1352;msp_1766;msp_1815;msp_1816;msp_0148c;msp_0239;msp_0359;msp_0474;msp_0483;msp_0603c;msp_0894;msp_0923;msp_0954;msp_0997;msp_1006;msp_1773;msp_1799;msp_0110;msp_0341;msp_0437c;msp_0666;msp_1237;msp_129…	Escherichia coli;Klebsiella pneumoniae;Providencia rettgeri 2;Morganella morganii;Enterobacter hormaechei;Klebsiella oxytoca;Parasutterella excrementihominis;Klebsiella aerogenes;Klebsiella quasipneumoniae;[Acinetobacter] sp. N54.MGS-139 / Proteobacteria bacterium CAG:139;Enterobacter roggenkampii;Proteus mirabilis;Veillonella parvula;Mitsuokella multacida;Eggerthella sp. CAG:298;Turicimonas muri…	M00530:Dissimilatory nitrate reduction, nitrate => ammonia ;M00529:Denitrification, nitrate => nitrogen ;M00804:Complete nitrification, comammox, ammonia => nitrite => nitrate	Nitrogen metabolism	K00370;K00371;K00373;K00374	Nitr_red_alph_N;Nitr_red_bet_C;Nitrate_red_gam	b1224	-	-	-	-	Respiratory nitrate reductase alpha chain (EC 1.7.99.4)	K00370;K00371;K00373;K00374;Nitr_red_alph_N;Nitr_red_bet_C;Nitrate_red_gam;b1224
CL-162	3	47	Yes	No	msp_0007;msp_0008;msp_0016;msp_0022;msp_0026;msp_0037;msp_0069;msp_0097;msp_0101;msp_0105;msp_0139;msp_0217;msp_0229;msp_0277;msp_0322;msp_0355;msp_0376;msp_0465;msp_0495;msp_0532;msp_0569;msp_0607;msp_0614;msp_0646;msp_0672;msp_0736c;msp_0762;msp_0786;msp_0813;msp_0835;msp_0894;msp_0962;msp_0995;msp_1002;msp_1098;msp_1360;msp_1406;msp_1546;msp_1560;msp_1578c;msp_1690;msp_1814;msp_1829;msp_1843;m…	Bacteroides ovatus;Bacteroides intestinalis;Bacteroides plebeius;Bacteroides finegoldii;Paraprevotella clara;Bacteroides salyersiae;Bacteroides vulgatus;Paraprevotella xylaniphila;Bacteroides sp. CAG:875 & sp. 2789STDY5834845;Ruminococcus sp. CAG:177;Coprobacter fastidiosus;Bacteroides ndongoniae;Prevotella sp. 885;[Eubacterium] sp. CAG:251 / [Clostridium] sp. A254.MGS-251;unclassified Ruminococc…	-	-	K18579	Glyco_hydr_30_2	-	cazy.GH30_4	-	-	-	-	Glyco_hydr_30_2;cazy.GH30_4;K18579
CL-516	3	47	Yes	No	msp_0003;msp_0005;msp_0008;msp_0017;msp_0021;msp_0028;msp_0030;msp_0035;msp_0038;msp_0062;msp_0082c;msp_0086;msp_0100;msp_0108;msp_0140;msp_0153;msp_0157;msp_0167c;msp_0174;msp_0209;msp_0228;msp_0282;msp_0341;msp_0376;msp_0427;msp_0438;msp_0517;msp_0595;msp_0626;msp_0633;msp_0743;msp_0754c;msp_0865;msp_0876;msp_1058c;msp_1330;msp_1331;msp_1352;msp_1432;msp_1511c;msp_1554c;msp_1754;msp_1766;msp_18…	Bacteroides cellulosilyticus;Escherichia coli;Bacteroides intestinalis;Roseburia intestinalis;Bacteroides xylanisolvens;Parabacteroides goldsteinii;Klebsiella pneumoniae;Bacteroides dorei;unclassified Lentisphaeria;Odoribacter splanchnicus;Providencia rettgeri 2;[Clostridium] symbiosum;Morganella morganii;Enterobacter hormaechei;Klebsiella oxytoca;Erysipelatoclostridium ramosum;Klebsiella aerogen…	-	-	K12582	Glyco_transf_56	-	cazy.GT56	-	-	-	-	K12582;Glyco_transf_56;cazy.GT56
CL-639	3	47	Yes	No	msp_0030;msp_0108;msp_0138;msp_0140;msp_0157;msp_0166;msp_0174;msp_0209;msp_0241;msp_0263;msp_0333;msp_0408;msp_0419;msp_0437c;msp_0469c;msp_0570;msp_0600c;msp_0627;msp_0633;msp_0691;msp_0712;msp_0843;msp_0865;msp_0866c;msp_0878;msp_0890c;msp_0910;msp_0916;msp_0925;msp_0974c;msp_1006;msp_1059c;msp_1089;msp_1099c;msp_1155;msp_1196;msp_1208;msp_1220;msp_1222;msp_1237;msp_1268;msp_1287;msp_1352;msp_…	Klebsiella pneumoniae;Enterobacter hormaechei;Bifidobacterium pseudocatenulatum;Klebsiella oxytoca;Klebsiella aerogenes;Bifidobacterium longum;Klebsiella quasipneumoniae;Enterobacter roggenkampii;Klebsiella variicola;Bifidobacterium adolescentis;Lactobacillus ruminis;Lactobacillus mucosae;Bifidobacterium bifidum;Actinomyces oris;Bifidobacterium scardovii;Bifidobacterium dentium;Weissella cibaria;…	-	-	K02074;K02075;K02077	-	-	-	-	-	-	-	K02074;K02075;K02077
CL-588	11	46	Yes	No	msp_0005;msp_0030;msp_0103;msp_0108;msp_0131;msp_0140;msp_0157;msp_0195;msp_0204;msp_0209;msp_0210;msp_0278;msp_0286;msp_0292;msp_0323;msp_0325;msp_0329;msp_0369;msp_0405;msp_0413;msp_0479;msp_0573;msp_0595;msp_0785;msp_0797;msp_0800;msp_0970;msp_1013;msp_1131;msp_1217;msp_1331;msp_1495;msp_1766;msp_1838;msp_1848;msp_0110;msp_0253;msp_0341;msp_0613;msp_0978;msp_0174;msp_0178;msp_0242;msp_0969;msp…	Escherichia coli;Klebsiella pneumoniae;[Clostridium] innocuum;Enterobacter hormaechei;Phascolarctobacterium faecium;Klebsiella oxytoca;Klebsiella aerogenes;Desulfovibrio piger;Clostridia bacterium UC5.1-1D10 / [Clostridium] sp. CAG:505 / Firmicutes bacterium CAG:466;Enterobacter roggenkampii;unclassified Ruminococcus;Erysipelotrichaceae bacterium 3_1_53;Ruminococcus sp. 37_24 & sp. 2789STDY583493…	-	-	K05781;K06162;K06163;K06164;K06165;K06166;K05780	PhnG;PhnH;PhnI;PhnJ	-	-	-	-	-	-	K05781;K06162;K06163;K06164;K06165;K06166;PhnG;PhnH;PhnI;PhnJ;K05780
CL-198	3	46	Yes	No	msp_0028;msp_0044;msp_0126;msp_0156;msp_0166;msp_0171;msp_0231;msp_0246;msp_0250;msp_0260;msp_0299;msp_0385;msp_0419;msp_0440;msp_0464;msp_0479;msp_0497;msp_0515;msp_0602c;msp_0711c;msp_0767;msp_0792;msp_0812;msp_0853c;msp_0868;msp_0974c;msp_0999;msp_1041;msp_1046;msp_1118;msp_1156;msp_1202;msp_1208;msp_1335;msp_1336;msp_1351;msp_1479;msp_1519;msp_1543;msp_1584;msp_1624;msp_1679;msp_1814;msp_1820…	Parabacteroides goldsteinii;Hungatella hathewayi 1;[Ruminococcus] torques;unclassified Parabacteroides;Bifidobacterium longum;Blautia hansenii;unclassified_Erysipelotrichaceae;Tyzzerella nexilis;[Ruminococcus] lactaris;Prevotella lascolaii;[Eubacterium] ramulus;[Ruminococcaceae] bacterium D16 / Clostridiales bacterium Choco116;Bifidobacterium bifidum;unclassified Roseburia;[Eubacterium] ramulus 2…	-	-	-	Glyco_hyd_101C;Glyco_hydro_101	-	cazy.GH101	-	-	-	-	Glyco_hyd_101C;Glyco_hydro_101;cazy.GH101
CL-230	3	45	Yes	No	msp_0030;msp_0082c;msp_0100;msp_0108;msp_0110;msp_0140;msp_0157;msp_0170;msp_0174;msp_0183;msp_0195;msp_0209;msp_0220;msp_0226;msp_0228;msp_0241;msp_0253;msp_0295;msp_0368c;msp_0369;msp_0375;msp_0503;msp_0626;msp_0633;msp_0642;msp_0656;msp_0672;msp_0695;msp_0718;msp_0788;msp_0795;msp_0830;msp_0865;msp_0895;msp_0913;msp_1076;msp_1331;msp_1352;msp_1387;msp_1432;msp_1639;msp_1766;msp_1815;msp_1816;m…	Klebsiella pneumoniae;Providencia rettgeri 2;Morganella morganii;Enterobacter hormaechei;Bilophila wadsworthia;Klebsiella oxytoca;Klebsiella aerogenes;Azospirillum sp. CAG:239;Klebsiella quasipneumoniae;[Acetobacter] sp. 46_36 & CAG:267 / Alphaproteobacteria bacterium UBA7083;Desulfovibrio piger;Enterobacter roggenkampii;Azospirillum sp. 51_20;Desulfovibrionaceae bacterium CIM:MAG 900;Proteus mir…	-	-	K06192;K09857	ABC_trans_aux	-	-	-	-	-	-	K06192;K09857;ABC_trans_aux
CL-493	3	45	Yes	No	msp_0011;msp_0013;msp_0024;msp_0043;msp_0044;msp_0047;msp_0053;msp_0075;msp_0127;msp_0139;msp_0165;msp_0170;msp_0175;msp_0178;msp_0194;msp_0207;msp_0210;msp_0243;msp_0247;msp_0254;msp_0260;msp_0262;msp_0282;msp_0286;msp_0294;msp_0325;msp_0367;msp_0402;msp_0405;msp_0420;msp_0427;msp_0444;msp_0456;msp_0481;msp_0542;msp_0688;msp_0691;msp_0717;msp_0770;msp_0797;msp_1020;msp_1121;msp_1223c;msp_1520;ms…	Bacteroides thetaiotaomicron;Ruminococcus bicirculans;Hungatella effluvii;Bacteroides coprocola;Hungatella hathewayi 1;[Eubacterium] sp. CAG:115;[Eubacterium] siraeum;Lachnospiraceae bacterium GAM79 / [Clostridium] sp. CAG:91 & sp. 2789STDY5834873;Ruminococcus sp. CAG:353 & sp. 2789STDY5834938;Coprobacter fastidiosus;unclassified Lachnospiraceae;Azospirillum sp. CAG:239;Lachnospiraceae bacterium …	-	-	K01202	Glyco_hydro_59	-	cazy.GH59	-	-	-	-	K01202;Glyco_hydro_59;cazy.GH59
CL-613	3	45	Yes	No	msp_0086;msp_0104;msp_0109;msp_0129;msp_0186;msp_0193;msp_0203;msp_0232;msp_0259;msp_0274;msp_0308;msp_0342;msp_0346;msp_0357;msp_0359;msp_0385;msp_0462;msp_0472;msp_0478;msp_0482;msp_0492;msp_0506;msp_0545;msp_0604;msp_0647;msp_0678;msp_0737;msp_0898;msp_0906;msp_0953;msp_0958;msp_0988;msp_1035;msp_1183;msp_1220;msp_1222;msp_1310;msp_1326;msp_1383c;msp_1433;msp_1444;msp_1484;msp_1840;msp_1948;ms…	[Clostridium] symbiosum;Emergencia timonensis;[Clostridium] scindens 2;[Clostridium] sp. CAG:58;[Clostridium] sp. CAG:299;[Clostridium] scindens 1;Negativibacillus massiliensis;Dorea sp. CAG:317;Coprococcus comes;Sellimonas intestinalis == Drancourtella massiliensis;[Clostridium] saccharolyticum 2;Flavonifractor sp. 2789STDY5834931 / Clostridiales bacterium CCNA10;Lachnoclostridium sp. SNUG30386 …	M00518:GlnK-GlnL (glutamine utilization) two-component regulatory system	Two-component regulatory system	K07717;K07719	YcbB	-	-	-	-	-	-	K07717;YcbB;K07719
CL-23	5	44	Yes	No	msp_0005;msp_0030;msp_0100;msp_0108;msp_0130;msp_0140;msp_0157;msp_0167c;msp_0174;msp_0209;msp_0228;msp_0241;msp_0328;msp_0341;msp_0368c;msp_0544c;msp_0626;msp_0633;msp_0660;msp_0775;msp_0782;msp_0824;msp_0909;msp_0998;msp_1205;msp_1331;msp_1766;msp_1816;msp_0082c;msp_0455;msp_0564;msp_0620;msp_0819;msp_0838;msp_0865;msp_0897;msp_0915c;msp_1023;msp_1154;msp_1432;msp_1719;msp_1745;msp_1815;msp_2013	Escherichia coli;Klebsiella pneumoniae;Morganella morganii;Enterobacter hormaechei;Candidatus Gastranaerophilales bacterium x14;Klebsiella oxytoca;Klebsiella aerogenes;Plesiomonas shigelloides;Klebsiella quasipneumoniae;Enterobacter roggenkampii;Proteus mirabilis;Klebsiella variicola;[Brachyspira] sp. CAG:484;Klebsiella michiganensis 2;Aeromonas veronii;Escherichia fergusonii;Citrobacter portucal…	M00118:Glutathione biosynthesis, glutamate => glutathione	Cofactor and vitamin biosynthesis	K01920;K01669	GSH-S_N;Aconitase_B_N;Aconitase_2_N	-	-	-	-	-	-	K01920;GSH-S_N;Aconitase_B_N;K01669;Aconitase_2_N
CL-91	3	43	Yes	No	msp_0131;msp_0134;msp_0197;msp_0212;msp_0215;msp_0221;msp_0245;msp_0366;msp_0383;msp_0406;msp_0413;msp_0426;msp_0483;msp_0488;msp_0501;msp_0538;msp_0594;msp_0649;msp_0696;msp_0700;msp_0744;msp_0834;msp_0869;msp_0889;msp_0923;msp_0926;msp_0968c;msp_1024;msp_1034;msp_1036;msp_1040c;msp_1064;msp_1065;msp_1114;msp_1153;msp_1193;msp_1325;msp_1365;msp_1495;msp_1799;msp_1844;msp_1880;msp_2015	Phascolarctobacterium faecium;Megamonas funiformis == rupellensis;Megasphaera sp. BL7 & NM10;Dialister invisus;Dialister sp. Marseille-P5638 & CAG:357;Acidaminococcus intestini;Megasphaera massiliensis;unclassified Caecibacter;Dialister succinatiphilus;unclassified Veillonellaceae;unclassified Phascolarctobacterium;Dialister sp. CAG:486;Veillonella sp. CAG:933;Acidaminococcus massiliensis;Megasph…	-	-	-	DUF3084;TrpP;YlqD	-	-	-	-	-	-	DUF3084;TrpP;YlqD
CL-601	3	42	Yes	No	msp_0005;msp_0038;msp_0089;msp_0099;msp_0100;msp_0116;msp_0119;msp_0130;msp_0131;msp_0196;msp_0214;msp_0228;msp_0248;msp_0295;msp_0318;msp_0326;msp_0335;msp_0396;msp_0455;msp_0538;msp_0544c;msp_0620;msp_0660;msp_0677c;msp_0764;msp_0844c;msp_0849;msp_0881;msp_0882c;msp_0889;msp_1023;msp_1026;msp_1083;msp_1244;msp_1476;msp_1495;msp_1557;msp_1613;msp_1785;msp_1844;msp_2000;msp_2015	Escherichia coli;unclassified Lentisphaeria;Alistipes finegoldii;Lentisphaeria bacterium UBA1829;Morganella morganii;unclassified Lentisphaeria;unclassified Acidaminococcaceae;Candidatus Gastranaerophilales bacterium x14;Phascolarctobacterium faecium;Alistipes shahii;Alistipes sp. CAG:268;Proteus mirabilis;unclassified Lentisphaeria;Desulfovibrio fairfieldensis;Alistipes indistinctus;unclassified…	-	-	K12140;K12141;K12138	-	-	-	-	-	-	-	K12140;K12141;K12138
CL-134	8	41	Yes	No	msp_0005;msp_0030;msp_0050;msp_0103;msp_0107;msp_0134;msp_0200;msp_0245;msp_0358;msp_0359;msp_0366;msp_0482;msp_0621;msp_0626;msp_0655;msp_1034;msp_1089;msp_1325;msp_1700;msp_0108;msp_0146c;msp_0337;msp_0662;msp_0140;msp_0174;msp_0209;msp_0241;msp_0278;msp_0403;msp_0406;msp_0497;msp_0554;msp_0601c;msp_0603c;msp_0712;msp_0742;msp_0866c;msp_0938;msp_1040c;msp_1477;msp_1816	Escherichia coli;Klebsiella pneumoniae;Anaerobutyricum hallii;[Clostridium] innocuum;Anaerostipes hadrus 1;Megamonas funiformis == rupellensis;Anaerostipes caccae;Megasphaera massiliensis;unclassified Anaerobutyricum;Mitsuokella jalaludinii;unclassified Caecibacter;Mitsuokella multacida;Intestinibacter bartlettii;Citrobacter portucalensis;[Ruminococcus] sp. 2789STDY5608817 / [Eubacterium] sp. 278…	M00280:PTS system, glucitol/sorbitol-specific II component	Phosphotransferase system (PTS)	K02781;K02783;K02466	EII-GUT;GutM;PTSIIA_gutA;EIIBC-GUT_C;EIIBC-GUT_N	-	-	-	-	-	-	K02781;K02783;EII-GUT;GutM;PTSIIA_gutA;K02466;EIIBC-GUT_C;EIIBC-GUT_N
CL-597	4	41	Yes	No	msp_0005;msp_0082c;msp_0100;msp_0138;msp_0140;msp_0166;msp_0212;msp_0228;msp_0263;msp_0409;msp_0419;msp_0469c;msp_0570;msp_0574c;msp_0603c;msp_0610;msp_0626;msp_0627;msp_0715c;msp_0844c;msp_0869;msp_0878;msp_0881;msp_0910;msp_0963c;msp_1034;msp_1040c;msp_1081;msp_1155;msp_1168;msp_1193;msp_1234;msp_1245;msp_1325;msp_1457;msp_1476;msp_1648;msp_1783;msp_1785;msp_1794;msp_1801	Escherichia coli;Providencia rettgeri 2;Morganella morganii;Bifidobacterium pseudocatenulatum;Klebsiella oxytoca;Bifidobacterium longum;Dialister invisus;Proteus mirabilis;Bifidobacterium adolescentis;Pyramidobacter piscolens;Bifidobacterium bifidum;Bifidobacterium scardovii;Bifidobacterium dentium;Fusobacterium necrophorum;Selenomonas artemidis;Fusobacterium nucleatum subsp. animalis;Citrobacter…	-	-	K07243;K07230	FTR1;Iron_transport	-	-	-	-	-	-	K07243;FTR1;Iron_transport;K07230
CL-428	3	41	Yes	No	msp_0003;msp_0010;msp_0011;msp_0016;msp_0019;msp_0021;msp_0023;msp_0031;msp_0033;msp_0036;msp_0037;msp_0054;msp_0061;msp_0069;msp_0096;msp_0101;msp_0114;msp_0118;msp_0122;msp_0149;msp_0211;msp_0219;msp_0235;msp_0267;msp_0355;msp_0363;msp_0377;msp_0438;msp_0485;msp_0502;msp_0520c;msp_0609;msp_0721;msp_0736c;msp_1207;msp_1229;msp_1493;msp_1737;msp_1842;msp_1904;msp_1982	Bacteroides cellulosilyticus;Bacteroides fragilis 1;Bacteroides thetaiotaomicron;Bacteroides plebeius;Bacteroides faecis;Bacteroides xylanisolvens;Bacteroides caccae;Bacteroides stercoris;Bacteroides fragilis 2;Bacteroides eggerthii;Bacteroides salyersiae;Bacteroides nordii;Bacteroides congonensis;Bacteroides vulgatus;Bacteroides sp. CAG:443;Bacteroides sp. CAG:875 & sp. 2789STDY5834845;Bacteroid…	-	-	-	DUF3806;DUF3805;DUF4488	-	-	-	-	-	-	DUF3806;DUF3805;DUF4488
CL-688	3	41	Yes	No	msp_0003;msp_0007;msp_0008;msp_0010;msp_0011;msp_0021;msp_0022;msp_0041;msp_0043;msp_0046;msp_0061;msp_0077;msp_0084;msp_0118;msp_0168;msp_0196;msp_0261;msp_0310;msp_0320;msp_0326;msp_0327;msp_0339;msp_0381;msp_0429;msp_0439;msp_0460;msp_0508;msp_0543c;msp_0611;msp_0614;msp_0616;msp_0658;msp_0799;msp_0849;msp_1106;msp_1241;msp_1346c;msp_1727;msp_1737;msp_1978;msp_1981	Bacteroides cellulosilyticus;Bacteroides ovatus;Bacteroides intestinalis;Bacteroides fragilis 1;Bacteroides thetaiotaomicron;Bacteroides xylanisolvens;Bacteroides finegoldii;Prevotella copri 1;Bacteroides coprocola;Bacteroides uniformis;Bacteroides congonensis;unclassified Lachnospiraceae;Prevotella sp. RUG457 & sp. RUG782 & sp. CAG:386;unclassified Bacteroides;Firmicutes bacterium CAG:194;Alisti…	-	-	-	DUF5121;DUF5125;DUF5016	-	-	-	-	-	-	DUF5121;DUF5125;DUF5016
CL-32	180	40	Yes	No	msp_0466;msp_0005;msp_0280;msp_0092;msp_0030;msp_0209;msp_0414;msp_0768;msp_0108;msp_0386;msp_0157;msp_0202;msp_0288;msp_0617;msp_1331;msp_0228;msp_0618;msp_0082c;msp_0100;msp_0724;msp_0919;msp_0749;msp_1823;msp_0140;msp_0239;msp_0626;msp_0801;msp_1958;msp_0145;msp_0474;msp_0937;msp_0741;msp_1056;msp_0967;msp_0675;msp_1152;msp_0368c;msp_0984;msp_1092;msp_1088	unclassified Sutterella;Escherichia coli;Sutterella wadsworthensis 2;Sutterella wadsworthensis 1;Klebsiella pneumoniae;Enterobacter roggenkampii;Duodenibacillus massiliensis;unclassified Sutterellaceae;Enterobacter hormaechei;unclassified Sutterellaceae;Klebsiella aerogenes;[Acinetobacter] sp. N54.MGS-139 / Proteobacteria bacterium CAG:139;unclassified Sutterellaceae;unclassified Sutterellaceae;H…	M00150:Fumarate reductase, prokaryotes ;M00210:Phospholipid transport system ;M00230:Glutamate/aspartate transport system ;M00232:General L-amino acid transport system ;M00445:EnvZ-OmpR (osmotic stress response) two-component regulatory system ;M00514:TtrS-TtrR (tetrathionate respiration) two-component regulatory system ;M00742:Aminoglycoside resistance, protease FtsH;M00743:Aminoglycoside resist…	ATP synthesis;Saccharide, polyol, and lipid transport system;Phosphate and amino acid transport system;Two-component regulatory system;Drug resistance	K02427;K04044;K00246;K00795;K00982;K01141;K01525;K02339;K02533;K03089;K03562;K03599;K03643;K03673;K03981;K04082;K05501;K05802;K06202;K07121;K07287;K07320;K07323;K07638;K07659;K08304;K08305;K09969;K10004;K10763;K12973;K18900;K01147;K05834;K00990;K03600;K06186;K13288;K19804;K03805;K05805;K07673;K08227;K09016;K09970;K20542;K02686;K03557;K01414;K03611;K03806;K04760;K07122;K04755;K05539;K01150;K01894;…	Band_7_C;BOF;BON;DNA_pol3_chi;DsbC_N;DUF3458_C;DUF615;Exonuc_X-T_C;Frataxin_Cyay;GlnE;GST_N;HSCB_C;IF2_assoc;Lipoprotein_18;LolB;LppC;LptD;MlaC;MltA;PagP;PolyA_pol_arg_C;SecD-TM1;Sigma70_ner;SspB;TolB_N;UPF0149;SLT_2;DUF3418;GlnD_UR_UTase;CreA;YaeQ;NiFe-hyd_HybE;IspA;CBP_BcsG;Cyd_oper_YbgE;DsbB;DUF493;FBPase;Fe-S_biosyn;Histone_HNS;Iron_traffic;PilJ;Porin_1;POTRA_TamA_1;SLT_L;Ub-RnfH;ZapD;CcmH;DU…	STM3502;Z4942;SL1344_1747;SL1344_0306;MT3329;STM14_4260;ERDMAN_2439;SF4327;Z2313	cazy.GH103;cazy.GH102	-	-	-	Glutamine synthetase type I (EC 6.3.1.2);Polyphosphate kinase 2 (EC 2.7.4.1);D-sedoheptulose 7-phosphate isomerase (EC 5.3.1.28);Long-chain-fatty-acid--CoA ligase (EC 6.2.1.3);Aspartate-semialdehyde dehydrogenase (EC 1.2.1.11);ATP-dependent helicase HrpA;Na+/H+-dicarboxylate symporter	cazy.GH103;K02427;K04044;K00246;K00795;K00982;K01141;K01525;K02339;K02533;K03089;K03562;K03599;K03643;K03673;K03981;K04082;K05501;K05802;K06202;K07121;K07287;K07320;K07323;K07638;K07659;K08304;K08305;K09969;K10004;K10763;K12973;K18900;Band_7_C;BOF;BON;DNA_pol3_chi;DsbC_N;DUF3458_C;DUF615;Exonuc_X-T_C;Frataxin_Cyay;GlnE;GST_N;HSCB_C;IF2_assoc;Lipoprotein_18;LolB;LppC;LptD;MlaC;MltA;PagP;PolyA_pol_…
CL-603	3	40	Yes	No	msp_0005;msp_0009;msp_0020;msp_0030;msp_0049;msp_0052;msp_0076;msp_0092;msp_0108;msp_0110;msp_0111;msp_0129;msp_0140;msp_0154;msp_0157;msp_0174;msp_0186;msp_0203;msp_0209;msp_0234;msp_0253;msp_0308;msp_0462;msp_0466;msp_0544c;msp_0563;msp_0626;msp_0633;msp_0678;msp_0724;msp_0749;msp_0801;msp_0865;msp_0970;msp_1056;msp_1159;msp_1432;msp_1562;msp_1701c;msp_1766	Escherichia coli;[Clostridium] bolteae;[Clostridium] clostridioforme 1;Klebsiella pneumoniae;unclassified Lachnoclostridium;Blautia sp. CAG:257;Blautia wexlerae;Sutterella wadsworthensis 1;Enterobacter hormaechei;Bilophila wadsworthia;Faecalimonas umbilicata;[Clostridium] sp. CAG:58;Klebsiella oxytoca;Fusicatenibacter saccharivorans;Klebsiella aerogenes;Klebsiella quasipneumoniae;[Clostridium] sp…	-	-	K13890;K13891;K13889	-	-	-	-	-	-	-	K13890;K13891;K13889
CL-531	3	39	Yes	No	msp_0005;msp_0030;msp_0082c;msp_0108;msp_0138;msp_0140;msp_0146c;msp_0157;msp_0166;msp_0209;msp_0228;msp_0333;msp_0380;msp_0403;msp_0419;msp_0437c;msp_0469c;msp_0497;msp_0602c;msp_0626;msp_0627;msp_0712;msp_0742;msp_0832;msp_0833;msp_0865;msp_0878;msp_0910;msp_0983;msp_1099c;msp_1127;msp_1190c;msp_1222;msp_1237;msp_1341;msp_1477;msp_1543;msp_1748;msp_1816	Escherichia coli;Klebsiella pneumoniae;Providencia rettgeri 2;Enterobacter hormaechei;Bifidobacterium pseudocatenulatum;Klebsiella oxytoca;Streptococcus sanguinis;Klebsiella aerogenes;Bifidobacterium longum;Enterobacter roggenkampii;Proteus mirabilis;Lactobacillus ruminis;Streptococcus salivarius;Enterococcus faecium;Bifidobacterium bifidum;Actinomyces oris;Bifidobacterium scardovii;Enterococcus …	-	-	K06191	RNR_N	Rv1981c	-	-	-	-	Ribonucleotide reductase of class Ib (aerobic), beta subunit (EC 1.17.4.1)	K06191;RNR_N;Rv1981c
CL-623	5	38	Yes	No	msp_0013;msp_0014;msp_0030;msp_0108;msp_0134;msp_0140;msp_0165;msp_0175;msp_0180;msp_0209;msp_0243;msp_0292;msp_0323;msp_0329;msp_0359;msp_0420;msp_0431;msp_0444;msp_0469c;msp_0482;msp_0499;msp_0507;msp_0514;msp_0559;msp_0626;msp_0656;msp_0812;msp_1432;msp_1766;msp_1815;msp_1816;msp_0107;msp_0533;msp_0633;msp_1121;msp_1205;msp_1352;msp_1848	Ruminococcus bicirculans;Eisenbergiella tayi;Klebsiella pneumoniae;Enterobacter hormaechei;Megamonas funiformis == rupellensis;Klebsiella oxytoca;unclassified Lachnospiraceae;Lachnospiraceae bacterium TF01-11 / [Clostridium] sp. CAG:122;Blautia coccoides == Blautia producta;Enterobacter roggenkampii;[Clostridium] sp. CAG:253;unclassified Lachnospiraceae;unclassified Clostridiales;Clostridium buty…	M00813:Lantibiotic transport system	ABC-2 type and other transport systems	K11960;K11961;K11962;K11963;K11959	-	-	-	-	-	-	-	K11960;K11961;K11962;K11963;K11959
CL-464	4	38	Yes	No	msp_0030;msp_0047;msp_0050;msp_0076;msp_0094;msp_0100;msp_0112;msp_0162;msp_0165;msp_0169;msp_0228;msp_0243;msp_0296;msp_0305;msp_0323;msp_0331;msp_0359;msp_0370;msp_0371;msp_0427;msp_0433;msp_0435;msp_0444;msp_0522;msp_0621;msp_0860;msp_0885;msp_1070;msp_1312;msp_1653;msp_1658;msp_1677;msp_1746;msp_1788;msp_1990;msp_0017;msp_1118;msp_1519	Klebsiella pneumoniae;[Eubacterium] sp. CAG:115;Anaerobutyricum hallii;Blautia wexlerae;unclassified Roseburia;Morganella morganii;Blautia hydrogenotrophica;unclassified Blautia;unclassified Lachnospiraceae;Roseburia sp. CAG:197;Proteus mirabilis;[Clostridium] sp. CAG:253;unclassified Roseburia;Roseburia sp. CAG:303;unclassified Clostridiales;Oscillibacter sp. KLE 1728 & KLE 1745 & sp. PEA192 / O…	-	-	-	PRTase_1;PRTase_2;TRSP;PELOTA_1	-	-	-	-	-	-	PRTase_1;PRTase_2;TRSP;PELOTA_1
CL-605	3	38	Yes	No	msp_0013;msp_0024;msp_0031;msp_0044;msp_0056;msp_0064;msp_0103;msp_0109;msp_0111;msp_0112;msp_0157;msp_0160;msp_0190;msp_0192;msp_0203;msp_0219;msp_0278;msp_0332;msp_0394;msp_0462;msp_0522;msp_0678;msp_0698;msp_0785;msp_0831;msp_0837;msp_0852;msp_0855;msp_0911;msp_0970;msp_1169c;msp_1353;msp_1362;msp_1421;msp_1488;msp_1556;msp_1828;msp_1948	Ruminococcus bicirculans;Hungatella effluvii;Bacteroides stercoris;Hungatella hathewayi 1;unclassified Lachnoclostridium;unclassified Bacteroidales [Alistipes] sp. CAG:435;[Clostridium] innocuum;[Clostridium] scindens 2;Faecalimonas umbilicata;Blautia hydrogenotrophica;Klebsiella aerogenes;[Faecalitalea] sp. UBA637;Bacteroides sp. CAG:530;unclassified Oscillospiraceae;Negativibacillus massiliensi…	-	-	K19048	DUF1485;MlrC_C	-	-	-	-	-	-	DUF1485;MlrC_C;K19048
CL-300	4	37	Yes	No	msp_0003;msp_0007;msp_0008;msp_0010;msp_0011;msp_0019;msp_0021;msp_0022;msp_0023;msp_0031;msp_0033;msp_0036;msp_0037;msp_0046;msp_0054;msp_0061;msp_0063;msp_0211;msp_0217;msp_0219;msp_0235;msp_0267;msp_0336;msp_0363;msp_0485;msp_0520c;msp_1148;msp_1278;msp_1344c;msp_1578c;msp_1737;msp_1821;msp_0118;msp_0149;msp_0187;msp_0799;msp_1493	Bacteroides cellulosilyticus;Bacteroides ovatus;Bacteroides intestinalis;Bacteroides fragilis 1;Bacteroides thetaiotaomicron;Bacteroides faecis;Bacteroides xylanisolvens;Bacteroides finegoldii;Bacteroides caccae;Bacteroides stercoris;Bacteroides fragilis 2;Bacteroides eggerthii;Bacteroides salyersiae;Bacteroides uniformis;Bacteroides nordii;Bacteroides congonensis;Bacteroides clarus;Mediterranea …	-	-	K02651	DUF3352;DUF4858;DUF4010	-	-	-	-	-	-	DUF3352;DUF4858;K02651;DUF4010
CL-432	4	37	Yes	No	msp_0009;msp_0020;msp_0030;msp_0052;msp_0058;msp_0065;msp_0108;msp_0140;msp_0141;msp_0174;msp_0208;msp_0244;msp_0272;msp_0341;msp_0361;msp_0436;msp_0468;msp_0510;msp_0522;msp_0722;msp_0732;msp_0867;msp_1172;msp_1718;msp_1815;msp_1820;msp_0049;msp_0152;msp_0189;msp_0933;msp_1300c;msp_1309;msp_1654;msp_1705;msp_1747;msp_1817;msp_1948	[Clostridium] bolteae;[Clostridium] clostridioforme 1;Klebsiella pneumoniae;Blautia sp. CAG:257;[Ruminococcus] gnavus;[Ruminococcus] sp. CAG:17 / Blautia sp. 2789STDY5608880;Enterobacter hormaechei;Klebsiella oxytoca;Blautia massiliensis;Klebsiella quasipneumoniae;[Ruminococcus] sp. Marseille-P328 & Blautia sp. 2789STDY5608844 & sp. 2789STDY5608844;[Ruminococcus] sp. CAG:60 / Blautia sp. 2789STDY…	-	-	K10561;K10562;K10559;K10560	-	-	-	-	-	-	-	K10561;K10562;K10559;K10560
CL-312	3	37	Yes	No	msp_0032;msp_0062;msp_0089;msp_0090;msp_0117;msp_0128;msp_0151;msp_0184;msp_0191;msp_0196;msp_0216;msp_0225;msp_0230;msp_0261;msp_0287;msp_0324;msp_0326;msp_0327;msp_0335;msp_0381;msp_0416;msp_0417;msp_0429;msp_0523;msp_0537;msp_0636;msp_0743;msp_0764;msp_0815;msp_0987;msp_1083;msp_1108;msp_1582;msp_1727;msp_1837;msp_1841;msp_1859	Alistipes onderdonkii;Odoribacter splanchnicus;Alistipes finegoldii;Alistipes putredinis;Butyricimonas sp. Marseille-P4593;Butyricimonas virosa;Butyricimonas synergistica 2;Culturomica massiliensis;unclassified Butyricimonas;Alistipes shahii;Odoribacter laneus;Alistipes obesi;Alistipes inops == Tidjanibacter massiliensis;[Bacteroides] sp. CAG:770;Alistipes ihumii;Alistipes sp. cv1;unclassified Al…	-	-	K15527;K11165	Glu_cyclase_2	-	-	-	-	-	-	Glu_cyclase_2;K15527;K11165
CL-633	3	37	Yes	No	msp_0014;msp_0016;msp_0029;msp_0048;msp_0051;msp_0062;msp_0074;msp_0111;msp_0119;msp_0125;msp_0134;msp_0153;msp_0162;msp_0165;msp_0184;msp_0200;msp_0216;msp_0227;msp_0289;msp_0302;msp_0305;msp_0309;msp_0321;msp_0422;msp_0431;msp_0496;msp_0548;msp_0585;msp_0610;msp_0621;msp_0760;msp_0844c;msp_0860;msp_0963c;msp_1194;msp_1501;msp_1582	Eisenbergiella tayi;Bacteroides plebeius;[Eubacterium] eligens;[Eubacterium] sp. CAG:38;unclassified Muribaculaceae;Odoribacter splanchnicus;Roseburia sp. CAG:100 / Lachnospiraceae bacterium CIM:MAG 54;Faecalimonas umbilicata;unclassified Acidaminococcaceae;Firmicutes bacterium CAG:24 / [Clostridium] sp. 2789STDY5834869 & 2789STDY5834922;Megamonas funiformis == rupellensis;Erysipelatoclostridium …	M00602:Arabinosaccharide transport system	Saccharide, polyol, and lipid transport system	K19115;K19116;K19114	-	-	-	-	-	-	-	K19115;K19116;K19114
CL-200	3	35	Yes	No	msp_0022;msp_0023;msp_0061;msp_0084;msp_0096;msp_0149;msp_0199;msp_0236;msp_0327;msp_0378;msp_0381;msp_0416;msp_0429;msp_0508;msp_0525;msp_0551;msp_0599;msp_0611;msp_0630;msp_0646;msp_0680c;msp_0702;msp_0849;msp_0870;msp_0892;msp_0980;msp_0997;msp_1106;msp_1242;msp_1273;msp_1546;msp_1692;msp_1836;msp_1859;msp_1989	Bacteroides finegoldii;Bacteroides caccae;Bacteroides congonensis;Prevotella sp. RUG457 & sp. RUG782 & sp. CAG:386;Bacteroides sp. CAG:443;unclassified Bacteroides;Muribaculaceae bacterium sp6;[Eubacterium] ventriosum;[Bacteroides] sp. CAG:545;[Eubacterium] sp. CAG:156;Alistipes senegalensis;[Bacteroides] sp. CAG:709;Alistipes timonensis;unclassified Bacteroidales;unclassified Muribaculaceae;[Eub…	M00179:Ribosome, archaea	Ribosome	K20028	Glyco_hydro_cc	-	cazy.GH128	-	-	-	-	K20028;Glyco_hydro_cc;cazy.GH128
CL-56	9	34	Yes	No	msp_0005;msp_0082c;msp_0100;msp_0108;msp_0170;msp_0209;msp_0228;msp_0368c;msp_0375;msp_0544c;msp_0626;msp_0656;msp_0788;msp_0795;msp_0830;msp_0913;msp_1205;msp_1331;msp_1432;msp_1766;msp_1815;msp_1816;msp_0157;msp_0167c;msp_0226;msp_0295;msp_0642;msp_0695;msp_0718;msp_0895;msp_0119;msp_0844c;msp_0936c;msp_1613	Escherichia coli;Providencia rettgeri 2;Morganella morganii;Enterobacter hormaechei;Azospirillum sp. CAG:239;Enterobacter roggenkampii;Proteus mirabilis;Aeromonas veronii;Azospirillum sp. 47_25 & CAG:260;Escherichia fergusonii;Citrobacter portucalensis;Succinatimonas sp. UBA2849 & sp. CAG:777;unclassified Rhodospirillaceae;unclassified Rhodospirillaceae;unclassified Rhodospirillaceae;unclassified…	-	-	K02391;K02393;K02394;K02386	ChapFlgA;FlaE;FLgD_tudor;FlgH;FlgI	-	-	-	-	-	-	K02391;K02393;K02394;ChapFlgA;FlaE;FLgD_tudor;FlgH;FlgI;K02386
CL-446	6	34	Yes	No	msp_0005;msp_0020;msp_0030;msp_0056;msp_0066;msp_0100;msp_0108;msp_0135;msp_0140;msp_0181;msp_0209;msp_0314;msp_0341;msp_0522;msp_0565;msp_0592;msp_0622;msp_0662;msp_0770;msp_0853c;msp_0979;msp_1188;msp_1596;msp_1603c;msp_1606c;msp_1766;msp_0395;msp_0579;msp_0597;msp_1227c;msp_1352;msp_1524;msp_1528;msp_1777	Escherichia coli;[Clostridium] clostridioforme 1;Klebsiella pneumoniae;unclassified Lachnoclostridium;[Clostridium] sp. AT4;Morganella morganii;Enterobacter hormaechei;[Clostridium] clostridioforme 2;Klebsiella oxytoca;unclassified Marvinbryantia;Enterobacter roggenkampii;unclassified Christensenellaceae-Catabacteriaceae;Klebsiella michiganensis 2;Anaerotruncus colihominis;unclassified Ruminococc…	M00219:AI-2 transport system	Saccharide, polyol, and lipid transport system	K10556;K10557;K10558;K11216;K11531;K10555	-	-	-	-	-	-	-	K10556;K10557;K10558;K11216;K11531;K10555
CL-598	6	34	Yes	No	msp_0030;msp_0050;msp_0140;msp_0146c;msp_0148c;msp_0150c;msp_0174;msp_0213;msp_0249;msp_0266;msp_0279;msp_0289;msp_0358;msp_0483;msp_0544c;msp_0575;msp_0580;msp_0610;msp_0619;msp_0626;msp_0860;msp_0923;msp_0933;msp_0968c;msp_1329;msp_1331;msp_1718;msp_0052;msp_0436;msp_0510;msp_0669;msp_0767;msp_1237;msp_1816	Klebsiella pneumoniae;Anaerobutyricum hallii;Klebsiella oxytoca;Streptococcus sanguinis;Veillonella infantium;[Clostridium] methylpentosum;Klebsiella quasipneumoniae;Flavonifractor plautii;unclassified Ruminococcaceae;Fusobacterium ulcerans;Cloacibacillus porcorum;Fusobacterium varium;unclassified Anaerobutyricum;Veillonella sp. CAG:933;Escherichia fergusonii;[Eubacteriaceae] bacterium CHKCI004 &…	-	-	K01699;K13919;K13920	Dehydratase_LU;Dehydratase_MU;Dehydratase_SU	-	-	-	-	-	-	K01699;K13919;Dehydratase_LU;Dehydratase_MU;Dehydratase_SU;K13920
CL-247	3	34	Yes	No	msp_0030;msp_0092;msp_0110;msp_0131;msp_0134;msp_0170;msp_0183;msp_0199;msp_0202;msp_0220;msp_0226;msp_0245;msp_0327;msp_0375;msp_0426;msp_0538;msp_0580;msp_0594;msp_0603c;msp_0642;msp_0656;msp_0695;msp_0700;msp_0718;msp_0788;msp_0795;msp_0830;msp_0895;msp_0913;msp_0963c;msp_1044;msp_1151;msp_1838;msp_2036	Klebsiella pneumoniae;Sutterella wadsworthensis 1;Bilophila wadsworthia;Phascolarctobacterium faecium;Megamonas funiformis == rupellensis;Azospirillum sp. CAG:239;[Acetobacter] sp. 46_36 & CAG:267 / Alphaproteobacteria bacterium UBA7083;Muribaculaceae bacterium sp6;[Acinetobacter] sp. N54.MGS-139 / Proteobacteria bacterium CAG:139;Azospirillum sp. 51_20;Desulfovibrionaceae bacterium CIM:MAG 900;M…	-	-	-	VirB8;CagX;CagE_TrbE_VirB	-	-	-	-	-	-	VirB8;CagX;CagE_TrbE_VirB
CL-513	3	34	Yes	No	msp_0001;msp_0002;msp_0006;msp_0012;msp_0016;msp_0019;msp_0021;msp_0022;msp_0023;msp_0026;msp_0027;msp_0032;msp_0035;msp_0037;msp_0040;msp_0046;msp_0059;msp_0069;msp_0097;msp_0098;msp_0118;msp_0139;msp_0198;msp_0216;msp_0225;msp_0287;msp_0335;msp_0381;msp_0412;msp_0520c;msp_0573;msp_0638;msp_1631;msp_1826	Blastocystis sp. subtype 3;Blastocystis sp. subtype 1;Blastocystis sp. subtype 4;Parabacteroides distasonis;Bacteroides plebeius;Bacteroides faecis;Bacteroides xylanisolvens;Bacteroides finegoldii;Bacteroides caccae;Paraprevotella clara;Parabacteroides merdae;Alistipes onderdonkii;Bacteroides dorei;Bacteroides salyersiae;Bacteroides massiliensis;Bacteroides uniformis;Barnesiella intestinihominis;…	-	-	K16055	Glyco_transf_20	-	cazy.GT20	-	-	-	-	K16055;Glyco_transf_20;cazy.GT20
CL-612	3	34	Yes	No	msp_0042;msp_0162;msp_0171;msp_0175;msp_0178;msp_0189;msp_0207;msp_0243;msp_0262;msp_0272;msp_0282;msp_0307;msp_0321;msp_0323;msp_0422;msp_0436;msp_0454;msp_0524;msp_0604;msp_0624;msp_0697;msp_0742;msp_0804;msp_0886;msp_0983;msp_1017;msp_1020;msp_1197;msp_1200;msp_1268;msp_1271;msp_1287;msp_1748;msp_1979	Coprococcus eutactus 2;unclassified Blautia;Blautia hansenii;Lachnospiraceae bacterium TF01-11 / [Clostridium] sp. CAG:122;Ruminococcus sp. A254.MGS-254 & CAG:254;Blautia sp. CAG:237;[Roseburia] sp. CAG:380;[Clostridium] sp. CAG:253;Ruminococcus callidus;unclassified Blautia;Ruminococcus sp. CAG:330;Dorea longicatena 1;[Clostridium] sp. CAG:411;unclassified Clostridiales;Romboutsia timonensis;Bla…	-	-	K10121;K10122;K10120	-	-	-	-	-	-	-	K10121;K10122;K10120
CL-164	3	33	Yes	No	msp_0055;msp_0132;msp_0154;msp_0197;msp_0213;msp_0245;msp_0266;msp_0276;msp_0279;msp_0281;msp_0289;msp_0315;msp_0364;msp_0366;msp_0442;msp_0471;msp_0488;msp_0505;msp_0580;msp_0581;msp_0610;msp_0623;msp_0659;msp_0700;msp_0707;msp_0850;msp_0877;msp_0922;msp_1053;msp_1081;msp_1282;msp_1365;msp_1818	Firmicutes bacterium CAG:65 / [Clostridium] sp. 2789STDY5608883;Coprobacillus cateniformis;Fusicatenibacter saccharivorans;Megasphaera sp. BL7 & NM10;Flavonifractor plautii;Megasphaera massiliensis;Fusobacterium ulcerans;Flavonifractor sp. An10;Cloacibacillus porcorum;Catenibacterium sp. CAG:290;Fusobacterium varium;Firmicutes bacterium CAG:145;Intestinimonas butyriciproducens;unclassified Caecib…	-	-	K00678;K13766	AtuA	-	-	-	-	-	-	K00678;K13766;AtuA
CL-105	52	32	Yes	No	msp_0403;msp_0497;msp_0742;msp_0146c;msp_0712;msp_1127;msp_0380;msp_0486;msp_0832;msp_0833;msp_0408;msp_0691;msp_0843;msp_0983;msp_1237;msp_1287;msp_1341;msp_1477;msp_0602c;msp_1089;msp_0925;msp_1006;msp_1059c;msp_1190c;msp_1265;msp_0333;msp_1196;msp_1222;msp_0600c;msp_1543;msp_0890c;msp_1220	Enterococcus faecium;Enterococcus faecalis;Streptococcus parasanguinis;Streptococcus sanguinis;Lactobacillus salivarius;Streptococcus anginosus;Streptococcus salivarius;Lactococcus lactis subsp. lactis;Streptococcus pasteurianus;Streptococcus thermophilus;Lactobacillus mucosae;Lactobacillus amylovorus;Weissella confusa;Streptococcus lutetiensis;Lactobacillus reuteri;Lactobacillus delbrueckii;Stre…	M00095:C5 isoprenoid biosynthesis, mevalonate pathway ;M00849:C5 isoprenoid biosynthesis, mevalonate pathway, archaea ;M00708:Multidrug resistance, PatAB transporter;M00429:Competence-related DNA transformation transporter	Terpenoid backbone biosynthesis;Drug efflux transporter/pump;Bacterial secretion system	K03713;K00687;K00869;K00938;K01597;K06198;K16169;K02244;K00054;K01641;K02246;K02248;K03095;K18891;K18892;K21567;K08987;K04086;K10353	DUF1149;DUF1827;DnaI_N;DUF1129;DUF1447;DUF1694;DUF1831;DUF2129;DUF2140;DUF2969;DUF3397;DUF4479;DUF910;DUF915;EbsA;EcsB;HMG-CoA_red;PepX_N;ssDNA-exonuc_C;YabA;YozE_SAM_like;YSIRK_signal;DUF1304;HMG_CoA_synt_C;HMG_CoA_synt_N;DUF1797;DUF3042;UPF0223;ComGF;DUF4767	lmo1267;lmo1580;lmo0810	-	-	-	-	Spermidine/putrescine import ABC transporter substrate-binding protein PotD (TC 3.A.1.11.1);Cell division trigger factor (EC 5.2.1.8);Universal stress protein family	K03713;K00687;DUF1149;DUF1827;lmo1267;lmo1580;K00869;K00938;K01597;K06198;K16169;K02244;K00054;K01641;K02246;K02248;K03095;K18891;K18892;K21567;DnaI_N;DUF1129;DUF1447;DUF1694;DUF1831;DUF2129;DUF2140;DUF2969;DUF3397;DUF4479;DUF910;DUF915;EbsA;EcsB;HMG-CoA_red;PepX_N;ssDNA-exonuc_C;YabA;YozE_SAM_like;YSIRK_signal;lmo0810;K08987;K04086;DUF1304;HMG_CoA_synt_C;HMG_CoA_synt_N;DUF1797;DUF3042;UPF0223;Co…
CL-145	3	32	Yes	No	msp_0005;msp_0018;msp_0025;msp_0030;msp_0108;msp_0174;msp_0201;msp_0209;msp_0228;msp_0241;msp_0295;msp_0411;msp_0437c;msp_0483;msp_0626;msp_0671;msp_0691;msp_0853c;msp_0968c;msp_1046;msp_1059c;msp_1196;msp_1331;msp_1351;msp_1352;msp_1432;msp_1766;msp_1794;msp_1801;msp_1816;msp_1866;msp_1908	Escherichia coli;Eisenbergiella massiliensis;Akkermansia muciniphila;Klebsiella pneumoniae;Enterobacter hormaechei;Klebsiella quasipneumoniae;Akkermansia sp. KLE1605;Enterobacter roggenkampii;Proteus mirabilis;Klebsiella variicola;Desulfovibrio fairfieldensis;unclassified Akkermansia;Actinomyces oris;Veillonella sp. CAG:933;Citrobacter portucalensis;Turicibacter sanguinis 1;Lactobacillus amylovor…	-	-	-	Cu-oxidase_2;Cu-oxidase;Cu-oxidase_3	-	-	-	-	-	-	Cu-oxidase_2;Cu-oxidase;Cu-oxidase_3
CL-174	3	32	Yes	No	msp_0003;msp_0007;msp_0008;msp_0011;msp_0016;msp_0019;msp_0023;msp_0028;msp_0032;msp_0037;msp_0054;msp_0062;msp_0064;msp_0089;msp_0136;msp_0139;msp_0156;msp_0190;msp_0217;msp_0267;msp_0304;msp_0335;msp_0363;msp_0381;msp_0443;msp_0460;msp_0636;msp_0637;msp_1278;msp_1474;msp_1907;msp_2210	Bacteroides cellulosilyticus;Bacteroides ovatus;Bacteroides intestinalis;Bacteroides thetaiotaomicron;Bacteroides plebeius;Bacteroides faecis;Bacteroides caccae;Parabacteroides goldsteinii;Alistipes onderdonkii;Bacteroides salyersiae;Bacteroides nordii;Odoribacter splanchnicus;unclassified Bacteroidales [Alistipes] sp. CAG:435;Alistipes finegoldii;Prevotella sp. P4-51 & PA-67 & P5-64 & P5-108 & C…	M00287:PTS system, galactosamine-specific II component	Phosphotransferase system (PTS)	-	DUF5126;DUF4998;DUF5000	-	-	-	-	-	-	DUF5126;DUF4998;DUF5000
CL-517	3	32	Yes	No	msp_0014;msp_0015;msp_0018;msp_0052;msp_0058;msp_0076;msp_0085;msp_0091;msp_0109;msp_0125;msp_0160;msp_0165;msp_0166;msp_0224;msp_0274;msp_0275;msp_0300;msp_0303;msp_0330;msp_0365;msp_0382;msp_0497;msp_0515;msp_0541;msp_0552;msp_0558;msp_0792;msp_0878;msp_1019;msp_1477;msp_1525;msp_1864	Eisenbergiella tayi;Roseburia faecis;Eisenbergiella massiliensis;Blautia sp. CAG:257;[Ruminococcus] gnavus;Blautia wexlerae;unclassified Eisenbergiella;Prevotella sp. CAG:604;[Clostridium] scindens 2;Firmicutes bacterium CAG:24 / [Clostridium] sp. 2789STDY5834869 & 2789STDY5834922;[Faecalitalea] sp. UBA637;unclassified Lachnospiraceae;Bifidobacterium longum;Prevotella copri 2;Sellimonas intestina…	-	-	K20385	DUF4135	-	-	-	lantipeptide	-	-	K20385;DUF4135;lantipeptide
CL-632	3	32	Yes	No	msp_0014;msp_0015;msp_0017;msp_0024;msp_0044;msp_0056;msp_0068;msp_0071;msp_0085;msp_0094;msp_0113;msp_0162;msp_0163;msp_0171;msp_0180;msp_0237;msp_0268;msp_0307;msp_0309;msp_0314;msp_0362;msp_0533;msp_0553;msp_0577;msp_0579;msp_0713;msp_0751;msp_1485;msp_1529;msp_1601;msp_1628;msp_1677	Eisenbergiella tayi;Roseburia faecis;Roseburia intestinalis;Hungatella effluvii;Hungatella hathewayi 1;unclassified Lachnoclostridium;[Eubacterium] rectale;Roseburia hominis;unclassified Eisenbergiella;unclassified Roseburia;Blautia producta 2;unclassified Blautia;Firmicutes bacterium CAG:227;Blautia hansenii;Blautia coccoides == Blautia producta;Roseburia sp. CAG:182;Blautia sp. N6H1-15;Dorea lo…	M00224:Fluoroquinolone transport system	ABC-2 type and other transport systems	K17235;K17236;K17234	-	-	-	-	-	-	-	K17235;K17236;K17234
CL-635	3	32	Yes	No	msp_0015;msp_0018;msp_0052;msp_0058;msp_0109;msp_0111;msp_0113;msp_0180;msp_0232;msp_0237;msp_0309;msp_0329;msp_0380;msp_0422;msp_0454;msp_0459;msp_0486;msp_0510;msp_0539;msp_0562;msp_0573;msp_0602c;msp_0706;msp_0712;msp_0832;msp_0925;msp_0933;msp_0983;msp_1137;msp_1341;msp_1477;msp_1718	Roseburia faecis;Eisenbergiella massiliensis;Blautia sp. CAG:257;[Ruminococcus] gnavus;[Clostridium] scindens 2;Faecalimonas umbilicata;Blautia producta 2;Blautia coccoides == Blautia producta;Dorea sp. CAG:317;Roseburia sp. CAG:182;unclassified Blautia;Clostridium butyricum;Streptococcus salivarius;Romboutsia timonensis;unclassified Clostridium;unclassified Roseburia;Lactococcus lactis subsp. la…	M00599:Inositol-phosphate transport system	Saccharide, polyol, and lipid transport system	K20491;K20492;K20490	-	-	-	-	-	-	-	K20491;K20492;K20490
CL-1328	3	32	Yes	No	msp_0005;msp_0030;msp_0103;msp_0107;msp_0109;msp_0157;msp_0188;msp_0200;msp_0278;msp_0334;msp_0337;msp_0338;msp_0361;msp_0473c;msp_0497;msp_0601c;msp_0626;msp_0633;msp_0648;msp_0655;msp_0662;msp_0831;msp_0852;msp_0938;msp_0949;msp_1089;msp_1331;msp_1336;msp_1428;msp_1682c;msp_1700;msp_1906	Escherichia coli;Klebsiella pneumoniae;[Clostridium] innocuum;Anaerostipes hadrus 1;[Clostridium] scindens 2;Klebsiella aerogenes;Erysipelatoclostridium sp1;Anaerostipes caccae;Erysipelotrichaceae bacterium 3_1_53;Erysipelotrichaceae bacterium 5_2_54FAA / [Eubacterium] sp. 3_1_31;[Eubacterium] sp. 38_16 & CAG:146;Fusobacterium mortiferum;Firmicutes bacterium CAG:170;[Clostridium] sp. 2789STDY5834…	-	-	K17466;K17467;K17465	-	-	-	-	-	-	-	K17466;K17467;K17465
CL-227	17	31	Yes	No	msp_0005;msp_0145;msp_0202;msp_0280;msp_0288;msp_0414;msp_0618;msp_0749;msp_0919;msp_1823;msp_0082c;msp_0092;msp_0386;msp_0617;msp_0626;msp_0768;msp_0239;msp_0474;msp_0715c;msp_1958;msp_0167c;msp_0466;msp_0724;msp_0801;msp_0881;msp_0937;msp_0954;msp_1092;msp_1794;msp_0741;msp_1056	Escherichia coli;Parasutterella excrementihominis;[Acinetobacter] sp. N54.MGS-139 / Proteobacteria bacterium CAG:139;Sutterella wadsworthensis 2;unclassified Sutterellaceae;Duodenibacillus massiliensis;Turicimonas muris;unclassified Sutterella;unclassified Sutterella;unclassified Sutterella;Providencia rettgeri 2;Sutterella wadsworthensis 1;unclassified Sutterellaceae;unclassified Sutterellaceae;…	M00530:Dissimilatory nitrate reduction, nitrate => ammonia ;M00529:Denitrification, nitrate => nitrogen	Nitrogen metabolism	K02200;K00127;K02380;K00124;K03532;K02567;K02568;K04014;K04015;K07812;K02570;K03636	NapB;FdhE;MoaE;NapD;CcmD	-	-	-	-	-	-	K02200;NapB;K00127;K02380;FdhE;K00124;MoaE;K03532;K02567;K02568;K04014;K04015;K07812;NapD;K02570;CcmD;K03636
CL-286	9	31	Yes	No	msp_0005;msp_0030;msp_0108;msp_0140;msp_0157;msp_0209;msp_0329;msp_0362;msp_0368c;msp_0544c;msp_0792;msp_1331;msp_1351;msp_1352;msp_1432;msp_1677;msp_1766;msp_1820;msp_0174;msp_0347;msp_0515;msp_0626;msp_1046;msp_1601;msp_1679;msp_1815;msp_0167c;msp_0341;msp_0454;msp_1567;msp_1816	Escherichia coli;Klebsiella pneumoniae;Enterobacter hormaechei;Klebsiella oxytoca;Klebsiella aerogenes;Enterobacter roggenkampii;Clostridium butyricum;Clostridium saudiense;Aeromonas veronii;Escherichia fergusonii;Clostridium perfringens;Hafnia paralvei;Clostridium celatum;Enterobacter cloacae;Citrobacter koseri;unclassified Clostridium;Enterobacter ludwigii;Clostridium sp. CL-2;Klebsiella quasip…	-	-	K06415;K07180;K07300;K08997;K09786	SpoVR;DUF444;PrkA;UPF0061	-	-	-	-	-	-	K06415;SpoVR;K07180;K07300;K08997;K09786;DUF444;PrkA;UPF0061
CL-364	4	31	Yes	No	msp_0166;msp_0263;msp_0419;msp_0437c;msp_0469c;msp_0570;msp_0627;msp_0662;msp_0785;msp_0873;msp_0878;msp_0910;msp_0916;msp_0946;msp_0969;msp_0970;msp_0999;msp_1099c;msp_1142;msp_1155;msp_1159;msp_1244;msp_1401c;msp_1528;msp_0138;msp_0473c;msp_0840;msp_1227c;msp_1436;msp_1607c;msp_1818	Bifidobacterium longum;Bifidobacterium adolescentis;Bifidobacterium bifidum;Actinomyces oris;Bifidobacterium scardovii;Bifidobacterium dentium;Bifidobacterium breve;bacterium OL-1;Collinsella tanakaei;Olsenella sp. Marseille-P2300;Bifidobacterium gallinarum == saeculare ;Bifidobacterium catenulatum;Bifidobacterium animalis;Collinsella intestinalis;Olsenella provencensis;Collinsella bouchesdurhone…	M00233:Glutamate transport system	Phosphate and amino acid transport system	K10005;K10007;K10006;K10008	-	-	-	-	-	-	-	K10005;K10007;K10006;K10008
CL-650	4	30	Yes	No	msp_0109;msp_0111;msp_0193;msp_0232;msp_0245;msp_0246;msp_0259;msp_0274;msp_0307;msp_0398;msp_0446c;msp_0524;msp_0604;msp_0655;msp_0712;msp_0868;msp_0935;msp_0974c;msp_1034;msp_1035;msp_1040c;msp_1084;msp_1325;msp_1478;msp_0379;msp_0530;msp_0706;msp_1293;msp_1337c;msp_1773	[Clostridium] scindens 2;Faecalimonas umbilicata;[Clostridium] scindens 1;Dorea sp. CAG:317;Megasphaera massiliensis;Tyzzerella nexilis;Coprococcus comes;Sellimonas intestinalis == Drancourtella massiliensis;Dorea longicatena 1;Clostridia bacterium CIM:MAG 635;Oribacterium sinus;Mordavella sp. Marseille-P3756;Dorea sp. CAG:105;[Ruminococcus] sp. 2789STDY5608817 / [Eubacterium] sp. 2789STDY5834872…	-	-	K10794;K10795;K10796;K10793	-	-	-	-	-	-	-	K10794;K10795;K10796;K10793
CL-515	3	29	Yes	No	msp_0009;msp_0011;msp_0023;msp_0040;msp_0044;msp_0061;msp_0068;msp_0070;msp_0074;msp_0124;msp_0152;msp_0188;msp_0201;msp_0231;msp_0273;msp_0328;msp_0363;msp_0374;msp_0407;msp_0411;msp_0418;msp_0456;msp_0460;msp_0480;msp_0503;msp_0675;msp_1692;msp_1814;msp_2036	[Clostridium] bolteae;Bacteroides thetaiotaomicron;Bacteroides caccae;Bacteroides massiliensis;Hungatella hathewayi 1;Bacteroides congonensis;[Eubacterium] rectale;Akkermansia muciniphila 2;Roseburia sp. CAG:100 / Lachnospiraceae bacterium CIM:MAG 54;Candidatus Cibiobacter qucibialis;[Ruminococcus] faecis;Erysipelatoclostridium sp1;Akkermansia sp. KLE1605;unclassified_Erysipelotrichaceae;[Clostri…	-	-	K00709	Glyco_transf_6	-	cazy.GT6	-	-	-	-	K00709;Glyco_transf_6;cazy.GT6
CL-636	3	29	Yes	No	msp_0024;msp_0044;msp_0106;msp_0303;msp_0311;msp_0317;msp_0319;msp_0396;msp_0437c;msp_0446c;msp_0452;msp_0461;msp_0490;msp_0513;msp_0518;msp_0541;msp_0573;msp_0677c;msp_0689;msp_0704;msp_0734;msp_0776;msp_0794;msp_0850;msp_0922;msp_0942;msp_1191c;msp_1199;msp_1577	Hungatella effluvii;Hungatella hathewayi 1;Clostridiales bacterium UBA7273 / Firmicutes bacterium CAG:240;unclassified Clostridiales 5;unclassified Clostridiales 5;unclassified Clostridiales 5;unclassified Clostridiales 5;Adlercreutzia equolifaciens;Actinomyces oris;Oribacterium sinus;unclassified Clostridiales 5;Clostridiales bacterium CIM:MAG 701;unclassified Ruminococcaceae;unclassified Clostr…	-	-	K09138	DUF364;DUF4213	-	-	-	-	-	-	DUF364;DUF4213;K09138
CL-683	3	29	Yes	No	msp_0007;msp_0011;msp_0016;msp_0019;msp_0021;msp_0022;msp_0031;msp_0032;msp_0036;msp_0041;msp_0043;msp_0061;msp_0063;msp_0078;msp_0084;msp_0091;msp_0096;msp_0101;msp_0118;msp_0190;msp_0224;msp_0293;msp_0335;msp_0390;msp_0495;msp_0520c;msp_0746;msp_1384;msp_1493	Bacteroides ovatus;Bacteroides thetaiotaomicron;Bacteroides plebeius;Bacteroides faecis;Bacteroides xylanisolvens;Bacteroides finegoldii;Bacteroides stercoris;Alistipes onderdonkii;Bacteroides eggerthii;Prevotella copri 1;Bacteroides coprocola;Bacteroides congonensis;Bacteroides clarus;Prevotella sp. CAG:732;Prevotella sp. RUG457 & sp. RUG782 & sp. CAG:386;Prevotella sp. CAG:604;Bacteroides sp. C…	-	-	-	DUF4984;DUF5003;DUF4458	-	-	-	-	-	-	DUF4984;DUF5003;DUF4458
CL-281	3	28	Yes	No	msp_0003;msp_0007;msp_0008;msp_0011;msp_0019;msp_0021;msp_0022;msp_0031;msp_0036;msp_0054;msp_0061;msp_0063;msp_0149;msp_0196;msp_0198;msp_0211;msp_0267;msp_0294;msp_0326;msp_0363;msp_0381;msp_0429;msp_0485;msp_0520c;msp_0637;msp_1344c;msp_1493;msp_1737	Bacteroides cellulosilyticus;Bacteroides ovatus;Bacteroides intestinalis;Bacteroides thetaiotaomicron;Bacteroides faecis;Bacteroides xylanisolvens;Bacteroides finegoldii;Bacteroides stercoris;Bacteroides eggerthii;Bacteroides nordii;Bacteroides congonensis;Bacteroides clarus;unclassified Bacteroides;Alistipes shahii;Coprobacter secundus == Gabonia massiliensis;Mediterranea massiliensis;unclassifi…	-	-	K19050	Polysacc_lyase	-	cazy.PL13	-	-	-	-	K19050;Polysacc_lyase;cazy.PL13
CL-119	3	27	Yes	No	msp_0005;msp_0030;msp_0108;msp_0140;msp_0157;msp_0174;msp_0209;msp_0241;msp_0280;msp_0396;msp_0573;msp_0584;msp_0626;msp_0633;msp_0638;msp_0677c;msp_0754c;msp_0794;msp_0865;msp_1009;msp_1331;msp_1339;msp_1472c;msp_1513;msp_1634;msp_1766;msp_1815	Escherichia coli;Klebsiella pneumoniae;Enterobacter hormaechei;Klebsiella oxytoca;Klebsiella aerogenes;Klebsiella quasipneumoniae;Enterobacter roggenkampii;Klebsiella variicola;Sutterella wadsworthensis 2;Adlercreutzia equolifaciens;Eggerthella lenta;Eggerthella sp. CAG:298;Citrobacter portucalensis;Klebsiella michiganensis 1;Enteroscipio rubneri;Slackia exigua;Citrobacter werkmanii == Citrobacte…	-	-	K07308;K07309	DmsC	-	-	-	-	-	-	K07308;K07309;DmsC
CL-640	3	27	Yes	No	msp_0032;msp_0089;msp_0090;msp_0195;msp_0225;msp_0230;msp_0287;msp_0295;msp_0318;msp_0324;msp_0465;msp_0503;msp_0523;msp_0532;msp_0636;msp_0672;msp_0764;msp_0815;msp_0844c;msp_0936c;msp_0951;msp_0963c;msp_1083;msp_1182;msp_1727;msp_1829;msp_1859	Alistipes onderdonkii;Alistipes finegoldii;Alistipes putredinis;Desulfovibrio piger;Alistipes obesi;Alistipes inops == Tidjanibacter massiliensis;Alistipes ihumii;Desulfovibrio fairfieldensis;Alistipes indistinctus;Alistipes sp. cv1;unclassified Opitutae;Coraliomargarita sp. CAG:312;unclassified Alistipes;unclassified Opitutae;Alistipes [Bacteroidales] bacterium 55_9;unclassified Opitutae;unclass…	-	-	K11785;K18285;K11784	-	-	-	-	-	-	-	K11785;K18285;K11784
CL-641	3	27	Yes	No	msp_0047;msp_0056;msp_0066;msp_0082c;msp_0092;msp_0100;msp_0110;msp_0129;msp_0131;msp_0134;msp_0145;msp_0183;msp_0202;msp_0220;msp_0239;msp_0280;msp_0357;msp_0359;msp_0414;msp_0488;msp_0594;msp_0618;msp_0768;msp_0770;msp_0926;msp_1065;msp_1391	[Eubacterium] sp. CAG:115;unclassified Lachnoclostridium;[Clostridium] sp. AT4;Providencia rettgeri 2;Sutterella wadsworthensis 1;Morganella morganii;Bilophila wadsworthia;[Clostridium] sp. CAG:58;Phascolarctobacterium faecium;Megamonas funiformis == rupellensis;Parasutterella excrementihominis;[Acetobacter] sp. 46_36 & CAG:267 / Alphaproteobacteria bacterium UBA7083;[Acinetobacter] sp. N54.MGS-1…	-	-	K09960	DUF2184;DUF2213	-	-	-	-	-	-	DUF2184;DUF2213;K09960
CL-376	32	26	Yes	No	msp_0328;msp_0660;msp_0782;msp_0819;msp_0838;msp_0897;msp_0915c;msp_1745;msp_0130;msp_0564;msp_0775;msp_0824;msp_0998;msp_1023;msp_0909;msp_1835;msp_1996;msp_0620;msp_1390;msp_0455;msp_1095;msp_1104;msp_1154;msp_1719;msp_1849;msp_0882c	[Brachyspira] sp. CAG:484;unclassified Candidatus Gastranaerophilales;Candidatus Gastranaerophilales bacterium MH_37 & HUM_20 / Melainabacteria sp. 35_41;Candidatus Gastranaerophilales bacterium HUM_2 / Candidatus Melainabacteria bacterium MEL.A1;Candidatus Gastranaerophilales sp2;Candidatus Gastranaerophilales sp3;unclassified Candidatus Gastranaerophilales;Candidatus Melainabacteria bacterium j…	M00040:Tyrosine biosynthesis, prephanate => pretyrosine => tyrosine ;M00601:Putative chitobiose transport system ;M00466:NblS-NblR (photosynthesis) two-component regulatory system ;M00467:SasA-RpaAB (circadian timing mediating) two-component regulatory system	Aromatic amino acid metabolism;Saccharide, polyol, and lipid transport system;Two-component regulatory system	K04081;K06044;K08333;K09139;K13273;K14598;K18740;K17244;K17245;K17246;K10697;K09799;K09981;K15226;K07769;K17717	DUF2817;DUF3326;Arm;Cnd1;DUF3536;DUF366;LdpA_C;zf-TFIIB;FAM83;DSHCT;SprA-related;ETF_QO;HEAT_EZ;HEAT_PBS;DUF475;DUF561	-	-	-	-	-	-	K04081;K06044;K08333;K09139;K13273;K14598;K18740;DUF2817;DUF3326;K17244;K17245;K17246;K10697;K09799;K09981;K15226;Arm;Cnd1;DUF3536;DUF366;LdpA_C;zf-TFIIB;K07769;K17717;FAM83;DSHCT;SprA-related;ETF_QO;HEAT_EZ;HEAT_PBS;DUF475;DUF561
CL-100	4	26	Yes	No	msp_0119;msp_0131;msp_0134;msp_0148c;msp_0212;msp_0215;msp_0313;msp_0383;msp_0413;msp_0426;msp_0483;msp_0594;msp_0869;msp_0884;msp_0923;msp_0926;msp_1024;msp_1036;msp_1064;msp_1065;msp_1153;msp_1329;msp_0538;msp_0834;msp_1613;msp_1691	unclassified Acidaminococcaceae;Phascolarctobacterium faecium;Megamonas funiformis == rupellensis;Veillonella infantium;Dialister invisus;Dialister sp. Marseille-P5638 & CAG:357;Veillonella parvula;Dialister succinatiphilus;unclassified Phascolarctobacterium;Dialister sp. CAG:486;Veillonella sp. CAG:933;Phascolarctobacterium sp. CAG:266;unclassified Acidaminococcaceae;Veillonella atypica;Veillone…	M00376:3-Hydroxypropionate bi-cycle ;M00375:Hydroxypropionate-hydroxybutylate cycle ;M00741:Propanoyl-CoA metabolism, propanoyl-CoA => succinyl-CoA ;M00577:Biotin biosynthesis, BioW pathway, pimelate => pimeloyl-CoA => biotin	Carbon fixation;Other carbohydrate metabolism;Cofactor and vitamin biosynthesis	K01849;K01906;K01848	BioW	-	-	-	-	-	-	K01849;K01906;BioW;K01848
CL-604	4	26	Yes	No	msp_0005;msp_0030;msp_0049;msp_0050;msp_0052;msp_0056;msp_0109;msp_0112;msp_0140;msp_0157;msp_0189;msp_0208;msp_0244;msp_0303;msp_0489;msp_0544c;msp_0656;msp_0913;msp_1401c;msp_1463;msp_1777;msp_0174;msp_0193;msp_0633;msp_0772;msp_1577	Escherichia coli;Klebsiella pneumoniae;unclassified Lachnoclostridium;Anaerobutyricum hallii;Blautia sp. CAG:257;unclassified Lachnoclostridium;[Clostridium] scindens 2;Blautia hydrogenotrophica;Klebsiella oxytoca;Klebsiella aerogenes;Blautia sp. CAG:237;[Ruminococcus] sp. Marseille-P328 & Blautia sp. 2789STDY5608844 & sp. 2789STDY5608844;[Ruminococcus] sp. CAG:60 / Blautia sp. 2789STDY5608836;un…	-	-	K17203;K17204;K17202	DUF2291	-	-	-	-	-	-	K17203;K17204;DUF2291;K17202
CL-322	3	26	Yes	No	msp_0003;msp_0007;msp_0011;msp_0019;msp_0022;msp_0036;msp_0037;msp_0061;msp_0067;msp_0069;msp_0102;msp_0118;msp_0122;msp_0149;msp_0176;msp_0256;msp_0267;msp_0351;msp_0568;msp_0616;msp_0721;msp_0774;msp_0789;msp_0875;msp_1014;msp_1475	Bacteroides cellulosilyticus;Bacteroides ovatus;Bacteroides thetaiotaomicron;Bacteroides faecis;Bacteroides finegoldii;Bacteroides eggerthii;Bacteroides salyersiae;Bacteroides congonensis;Prevotella sp. 109 & CAG:255;Bacteroides vulgatus;unclassified Bacteroides;unclassified Bacteroides;unclassified Bacteroides;unclassified Bacteroides;Prevotella sp. P4-65 & P4-76 & P5-60 & P5-119 & P5-125 & CAG:…	-	-	-	DUF3826	-	cazy.GH138;cazy.GH137	-	-	-	-	cazy.GH138;DUF3826;cazy.GH137
CL-628	3	26	Yes	No	msp_0013;msp_0029;msp_0047;msp_0053;msp_0095;msp_0170;msp_0183;msp_0206;msp_0210;msp_0220;msp_0323;msp_0451;msp_0493;msp_0499;msp_0564;msp_0642;msp_0660;msp_0695;msp_0775;msp_0782;msp_0788;msp_0795;msp_0830;msp_0963c;msp_1205;msp_2036	Ruminococcus bicirculans;[Eubacterium] eligens;[Eubacterium] sp. CAG:115;[Eubacterium] siraeum;unclassified Ruminococcaceae;Azospirillum sp. CAG:239;[Acetobacter] sp. 46_36 & CAG:267 / Alphaproteobacteria bacterium UBA7083;Butyrivibrio crossotus;unclassified Ruminococcus;Azospirillum sp. 51_20;unclassified Clostridiales;unclassified Ruminococcus;[Eubacterium] sp. CAG:603 & sp. 2789STDY5608818;[Cl…	-	-	K11004	HCBP_related;HemolysinCabind	-	-	-	-	-	-	HCBP_related;HemolysinCabind;K11004
CL-651	3	26	Yes	No	msp_0106;msp_0109;msp_0110;msp_0112;msp_0195;msp_0226;msp_0253;msp_0269;msp_0303;msp_0346;msp_0365;msp_0368c;msp_0550;msp_0704;msp_0732;msp_0745;msp_0773;msp_0793;msp_0851;msp_0854;msp_0933;msp_1087;msp_1140;msp_1320c;msp_1336;msp_1948	Clostridiales bacterium UBA7273 / Firmicutes bacterium CAG:240;[Clostridium] scindens 2;Bilophila wadsworthia;Blautia hydrogenotrophica;Desulfovibrio piger;Desulfovibrionaceae bacterium CIM:MAG 900;unclassified Bilophila;unclassified Clostridiales 5;unclassified Clostridiales 5;Lachnoclostridium sp. SNUG30386 / [Clostridium] sp. CAG:43;unclassified Lachnospiraceae;Aeromonas veronii;unclassified L…	-	-	K05773;K06857;K05772	-	-	-	-	-	-	-	K05773;K06857;K05772
CL-619	3	25	Yes	No	msp_0020;msp_0049;msp_0135;msp_0193;msp_0203;msp_0232;msp_0307;msp_0308;msp_0357;msp_0368c;msp_0409;msp_0446c;msp_0462;msp_0506;msp_0524;msp_0566;msp_0655;msp_0670;msp_0793;msp_1006;msp_1040c;msp_1190c;msp_1250;msp_1499;msp_1656	[Clostridium] clostridioforme 1;unclassified Lachnoclostridium;[Clostridium] clostridioforme 2;[Clostridium] scindens 1;Negativibacillus massiliensis;Dorea sp. CAG:317;Dorea longicatena 1;[Clostridium] saccharolyticum 2;[Clostridium] sp. CAG:169;Aeromonas veronii;Pyramidobacter piscolens;Oribacterium sinus;unclassified Ruminococcaceae;Dorea formicigenerans;Mordavella sp. Marseille-P3756;unclassif…	-	-	K16962;K16963;K16961	-	-	-	-	-	-	-	K16962;K16963;K16961
CL-1330	3	25	Yes	No	msp_0146c;msp_0153;msp_0160;msp_0188;msp_0281;msp_0333;msp_0358;msp_0403;msp_0454;msp_0602c;msp_0674;msp_0742;msp_0750;msp_0832;msp_0860;msp_0925;msp_1089;msp_1127;msp_1244;msp_1265;msp_1418c;msp_1477;msp_1547c;msp_1613;msp_1822	Streptococcus sanguinis;Erysipelatoclostridium ramosum;[Faecalitalea] sp. UBA637;Erysipelatoclostridium sp1;Catenibacterium sp. CAG:290;Lactobacillus ruminis;unclassified Anaerobutyricum;Enterococcus faecium;unclassified Clostridium;Streptococcus infantis 2;[Eubacterium] sp. 2789STDY5834909;Streptococcus parasanguinis;unclassified Lachnoclostridium;Streptococcus pasteurianus;unclassified Intestin…	-	-	K01220;K02786;K02788	-	-	-	-	-	-	-	K01220;K02786;K02788
CL-624	3	24	Yes	No	msp_0010;msp_0032;msp_0033;msp_0132;msp_0216;msp_0225;msp_0235;msp_0324;msp_0335;msp_0357;msp_0457;msp_0462;msp_0486;msp_0509;msp_0514;msp_0539;msp_0570;msp_0712;msp_0760;msp_0833;msp_1057c;msp_1130;msp_1340;msp_1437	Bacteroides fragilis 1;Alistipes onderdonkii;Bacteroides fragilis 2;Coprobacillus cateniformis;Odoribacter laneus;Alistipes obesi;unclassified Bacteroides;Alistipes sp. cv1;unclassified Alistipes;[Clostridium] sp. CAG:169;Faecalibacterium prausnitzii 9;unclassified Ruminococcaceae;Lactococcus lactis subsp. lactis;Evtepia gabavorus;unclassified Lachnospiraceae;unclassified Roseburia;Bifidobacteriu…	-	-	K20483	Lant_dehydr_C;Lant_dehydr_N	-	-	-	-	-	-	Lant_dehydr_C;Lant_dehydr_N;K20483
CL-188	3	22	Yes	No	msp_0003;msp_0007;msp_0008;msp_0021;msp_0022;msp_0036;msp_0041;msp_0054;msp_0061;msp_0063;msp_0067;msp_0084;msp_0267;msp_0338;msp_0417;msp_0439;msp_0460;msp_0939;msp_1284;msp_1578c;msp_1737;msp_2210	Bacteroides cellulosilyticus;Bacteroides ovatus;Bacteroides intestinalis;Bacteroides xylanisolvens;Bacteroides finegoldii;Bacteroides eggerthii;Prevotella copri 1;Bacteroides nordii;Bacteroides congonensis;Bacteroides clarus;Prevotella sp. 109 & CAG:255;Prevotella sp. RUG457 & sp. RUG782 & sp. CAG:386;unclassified Bacteroides;Fusobacterium mortiferum;unclassified Alistipes;unclassified Alistipes;…	-	-	K01729	Chondroitinas_B	-	cazy.PL6	-	-	-	-	K01729;Chondroitinas_B;cazy.PL6
CL-3	35	21	Yes	No	msp_0280;msp_0466;msp_1823;msp_0092;msp_0288;msp_0801;msp_0675;msp_0724;msp_0937;msp_1056;msp_0386;msp_0618;msp_0749;msp_0919;msp_0967;msp_0414;msp_0741;msp_0202;msp_1088;msp_0145;msp_0617	Sutterella wadsworthensis 2;unclassified Sutterella;unclassified Sutterella;Sutterella wadsworthensis 1;unclassified Sutterellaceae;Sutterella parvirubra;Sutterella sp. CAG:521;unclassified Sutterellaceae;unclassified Sutterellaceae;unclassified Sutterella;unclassified Sutterellaceae;Turicimonas muris;unclassified Sutterella;unclassified Sutterella;unclassified Sutterella;Duodenibacillus massilie…	M00064:ADP-L-glycero-D-manno-heptose biosynthesis ;M00820:SagS-HptB-HsbR (swarming activity and biofilm formation) two-component regulatory system	Lipopolysaccharide metabolism;Two-component regulatory system	K03619;K06441;K21344;K21345;K11407;K11712;K13543;K03618;K12071;K00534;K08086;K08720;K20975;K11711;K15022;K01075	DUF3426;DUF4390;EarP;RisS_PPD;DUF1840;DUF1857;DUF3455;DUF971;DUF1178;DUF3470;HyaE;DUF2868;HupH_C;Peptidase_M61;DUF3701;Prim_Zn_Ribbon;Chalcone_3	SL1344_3934	cazy.GT104	-	-	-	Putative transferase	K03619;K06441;K21344;K21345;DUF3426;DUF4390;EarP;RisS_PPD;K11407;K11712;K13543;DUF1840;DUF1857;DUF3455;DUF971;K03618;DUF1178;DUF3470;HyaE;DUF2868;HupH_C;cazy.GT104;K12071;K00534;K08086;K08720;K20975;SL1344_3934;K11711;K15022;Peptidase_M61;DUF3701;Prim_Zn_Ribbon;K01075;Chalcone_3
CL-501	3	21	Yes	No	msp_0136;msp_0149;msp_0153;msp_0199;msp_0236;msp_0300;msp_0378;msp_0525;msp_0551;msp_0630;msp_0702;msp_0892;msp_0997;msp_1106;msp_1197;msp_1407;msp_1647;msp_1662;msp_1692;msp_1830;msp_1930	Prevotella sp. P4-51 & PA-67 & P5-64 & P5-108 & CAG:474;unclassified Bacteroides;Erysipelatoclostridium ramosum;Muribaculaceae bacterium sp6;[Eubacterium] ventriosum;unclassified Prevotellaceae;[Eubacterium] sp. CAG:156;unclassified Muribaculaceae;[Eubacterium] sp. CAG:192;[Eubacterium] sp. CAG:161;unclassified Barnesiellaceae;unclassified Lachnospiraceae;unclassified Prevotella;unclassified Prev…	-	-	K01180	Glyco_hydro_81	-	cazy.GH81	-	-	-	-	K01180;Glyco_hydro_81;cazy.GH81
CL-456	6	20	Yes	No	msp_0074;msp_0146c;msp_0160;msp_0380;msp_0408;msp_0533;msp_0600c;msp_0602c;msp_0742;msp_0825;msp_0890c;msp_0925;msp_0938;msp_1035;msp_1220;msp_1237;msp_1287;msp_1748;msp_1773;msp_1810	Roseburia sp. CAG:100 / Lachnospiraceae bacterium CIM:MAG 54;Streptococcus sanguinis;[Faecalitalea] sp. UBA637;Streptococcus salivarius;Lactobacillus mucosae;unclassified Roseburia;Weissella cibaria;Streptococcus infantis 2;Streptococcus parasanguinis;Firmicutes bacterium CAG:791;Leuconostoc mesenteroides;Lactobacillus paragasseri;[Firmicutes] bacterium CAG:536;Mobilibacterium timonense;Lactobaci…	-	-	K12270;K12268;K12269	Asp1;Asp2;Sec-ASP3	-	-	-	-	-	-	K12270;K12268;Asp1;Asp2;Sec-ASP3;K12269
CL-502	3	20	Yes	No	msp_0007;msp_0022;msp_0026;msp_0078;msp_0097;msp_0224;msp_0282;msp_0294;msp_0404;msp_0434;msp_0445;msp_0520c;msp_0688;msp_0785;msp_0894;msp_1249;msp_1747;msp_1891;msp_1978;msp_1985	Bacteroides ovatus;Bacteroides finegoldii;Paraprevotella clara;Prevotella sp. CAG:732;Paraprevotella xylaniphila;Prevotella copri 2;Ruminococcus sp. CAG:330;Butyrivibrio sp. CAG:318;unclassified Clostridiales 5;unclassified Ruminococcus;unclassified Ruminococcus;Bacteroides gallinarum;unclassified Lachnospiraceae;Collinsella tanakaei;unclassified Prevotella;unclassified Prevotella;Faecalicatena f…	-	-	-	Glyco_hydro_98C;Glyco_hydro_98M	-	cazy.GH98	-	-	-	-	Glyco_hydro_98C;Glyco_hydro_98M;cazy.GH98
CL-400	5	19	Yes	No	msp_0145;msp_0202;msp_0280;msp_0288;msp_0386;msp_0414;msp_0617;msp_0618;msp_0724;msp_0801;msp_0894;msp_0937;msp_0954;msp_0997;msp_1384;msp_1728;msp_1793;msp_1981;msp_1152	Parasutterella excrementihominis;[Acinetobacter] sp. N54.MGS-139 / Proteobacteria bacterium CAG:139;Sutterella wadsworthensis 2;unclassified Sutterellaceae;unclassified Sutterellaceae;Duodenibacillus massiliensis;unclassified Sutterellaceae;Turicimonas muris;unclassified Sutterellaceae;Sutterella parvirubra;unclassified Prevotella;unclassified Sutterellaceae;unclassified Sutterellaceae;unclassifi…	M00762:Copper-processing system	ABC-2 type and other transport systems	K07218;K19341;K19342;K19340	NosL	-	-	-	-	-	-	K07218;K19341;K19342;NosL;K19340
CL-646	4	19	Yes	No	msp_0148c;msp_0212;msp_0313;msp_0446c;msp_0610;msp_0926;msp_0935;msp_1034;msp_1040c;msp_1057c;msp_1156;msp_1168;msp_1193;msp_1234;msp_1245;msp_1325;msp_1335;msp_0884;msp_1783	Veillonella infantium;Dialister invisus;Veillonella parvula;Oribacterium sinus;Fusobacterium nucleatum subsp. animalis;unclassified Dialister;Peptostreptococcus anaerobius;Anaeroglobus geminatus;Colibacter massiliensis;Peptoniphilus lacrimalis;Solobacterium moorei;Peptoniphilus harei;Dialister pneumosintes;Parvimonas micra;Parvimonas sp. KA00067;Megasphaera micronuciformis;Anaeromassilibacillus s…	M00585:L-Cystine transport system	Phosphate and amino acid transport system	K11708;K11709;K11710;K11707	-	-	-	-	-	-	-	K11708;K11709;K11710;K11707
CL-143	3	19	Yes	No	msp_0005;msp_0071;msp_0082c;msp_0228;msp_0573;msp_0584;msp_0595;msp_0626;msp_0638;msp_0677c;msp_0794;msp_0800;msp_1009;msp_1012;msp_1131;msp_1217;msp_1331;msp_1432;msp_1816	Escherichia coli;Roseburia hominis;Providencia rettgeri 2;Proteus mirabilis;Eggerthella lenta;Eggerthella sp. CAG:298;Cryptobacterium sp. CAG:338;Citrobacter portucalensis;Enteroscipio rubneri;Slackia exigua;Slackia isoflavoniconvertens;Eggerthella sp. 51_9 & CAG:209;Senegalimassilia anaerobia;Intestinimonas massiliensis;unclassified Eggerthella;Eggerthella sp. CAG:1427;Hafnia paralvei;Citrobacte…	-	-	K08299;K02182;K08297	-	-	-	-	-	-	-	K08299;K02182;K08297
CL-644	5	18	Yes	No	msp_0104;msp_0144;msp_0173;msp_0213;msp_0234;msp_0315;msp_0392;msp_0472;msp_0707;msp_0773;msp_0793;msp_0859;msp_1053;msp_1067;msp_1259c;msp_1783;msp_0737;msp_1840	Emergencia timonensis;[Clostridium] sp. CAG:138;Christensenellaceae bacterium Phil1 & [Clostridium] sp. CAG:226;Flavonifractor plautii;Catabacter sp. UBA1685 / Clostridia bacterium CIM:MAG 110_1;Firmicutes bacterium CAG:145;Firmicutes bacterium CAG:238;unclassified Clostridiales Family XIII. Incertae Sedis;unclassified Clostridiales Family XIII. Incertae Sedis;unclassified Clostridiales Family XI…	-	-	K17899;K21399;K21400;K17898	OAM_alpha	-	-	-	-	-	-	K17899;K21399;K21400;OAM_alpha;K17898
CL-172	3	18	Yes	No	msp_0001;msp_0002;msp_0004;msp_0006;msp_0010;msp_0481;msp_0583;msp_0642;msp_0695;msp_0719;msp_0761;msp_0828;msp_1187;msp_1279;msp_1319;msp_1386;msp_1621;msp_1814	Blastocystis sp. subtype 3;Blastocystis sp. subtype 1;Blastocystis sp. subtype 2;Blastocystis sp. subtype 4;Bacteroides fragilis 1;Ruminococcus sp. CAG:579;unclassified Fournierella;Proteobacteria bacterium CAG:495;unclassified Rhodospirillales;[Selenomonadales] bacterium CIM:MAG 469;unclassified Clostridiales 5;Massiliomicrobiota sp. An80 & An105 & An134 & An142;[Firmicutes] bacterium CIM:MAG 72…	-	-	K02927	Rad60-SLD;ubiquitin	-	-	-	-	-	-	Rad60-SLD;K02927;ubiquitin
CL-152	3	17	Yes	No	msp_0025;msp_0070;msp_0170;msp_0201;msp_0375;msp_0411;msp_0557;msp_0642;msp_0695;msp_0718;msp_0788;msp_0795;msp_0830;msp_0895;msp_1280;msp_1853;msp_1986	Akkermansia muciniphila;Akkermansia muciniphila 2;Azospirillum sp. CAG:239;Akkermansia sp. KLE1605;Azospirillum sp. 47_25 & CAG:260;unclassified Akkermansia;unclassified Akkermansiaceae;Proteobacteria bacterium CAG:495;unclassified Rhodospirillales;unclassified Rhodospirillales;unclassified Rhodospirillaceae;unclassified Rhodospirillaceae;unclassified Rhodospirillaceae;Acetobacter sp. CAG:977;Elu…	-	-	K00801;K02291	SQS_PSY	-	-	-	-	-	-	SQS_PSY;K00801;K02291
CL-253	3	17	Yes	No	msp_0110;msp_0195;msp_0226;msp_0253;msp_0295;msp_0369;msp_0978;msp_1076;msp_1195;msp_1339;msp_1345c;msp_1464;msp_1523;msp_1557;msp_1639;msp_1655c;msp_1693	Bilophila wadsworthia;Desulfovibrio piger;Desulfovibrionaceae bacterium CIM:MAG 900;unclassified Bilophila;Desulfovibrio fairfieldensis;uncultured Desulfovibrio sp. RUG514;unclassified Negativicutes 2;unclassified Bilophila;unclassified Negativicutes 2;Gordonibacter urolithinfaciens;unclassified Negativicutes 2;unclassified Bilophila;Desulfovibrio sp. Dsv1;unclassified Eggerthellaceae;Desulfovibr…	M00596:Dissimilatory sulfate reduction, sulfate => H2S	Sulfur metabolism	K11180;K11181;K18501	-	-	-	-	-	-	-	K11180;K11181;K18501
CL-676	3	17	Yes	No	msp_0038;msp_0116;msp_0120;msp_0170;msp_0183;msp_0220;msp_0368c;msp_0375;msp_0642;msp_0656;msp_0795;msp_0830;msp_0895;msp_0913;msp_1151;msp_1276;msp_1526	unclassified Lentisphaeria;unclassified Lentisphaeria;unclassified Victivallales;Azospirillum sp. CAG:239;[Acetobacter] sp. 46_36 & CAG:267 / Alphaproteobacteria bacterium UBA7083;Azospirillum sp. 51_20;Aeromonas veronii;Azospirillum sp. 47_25 & CAG:260;Proteobacteria bacterium CAG:495;Succinatimonas sp. UBA2849 & sp. CAG:777;unclassified Rhodospirillaceae;unclassified Rhodospirillaceae;Acetobact…	M00304:PTS system, fructose-specific II component	Phosphotransferase system (PTS)	-	Transglut_i_TM;Zn_protease;7TM_transglut	-	-	-	-	-	-	Transglut_i_TM;Zn_protease;7TM_transglut
CL-285	18	16	Yes	No	msp_0414;msp_0618;msp_0675;msp_0768;msp_0967;msp_0092;msp_0280;msp_1823;msp_0145;msp_0202;msp_0386;msp_0984;msp_0919;msp_1056;msp_1088;msp_0288	Duodenibacillus massiliensis;Turicimonas muris;Sutterella sp. CAG:521;unclassified Sutterellaceae;unclassified Sutterella;Sutterella wadsworthensis 1;Sutterella wadsworthensis 2;unclassified Sutterella;Parasutterella excrementihominis;[Acinetobacter] sp. N54.MGS-139 / Proteobacteria bacterium CAG:139;unclassified Sutterellaceae;unclassified Sutterellaceae;unclassified Sutterella;unclassified Sutt…	-	-	K12058;K12060;K12072;K12064;K12065;K12067;K12057;K12056	DUF3482;TraC_F_IV;TraH;TraN;TraV;TraG_N;TraU;TraE;TraK;TraL	-	-	-	-	-	-	K12058;K12060;DUF3482;TraC_F_IV;TraH;TraN;TraV;K12072;TraG_N;TraU;K12064;K12065;K12067;TraE;TraK;TraL;K12057;K12056
CL-250	6	16	Yes	No	msp_0110;msp_0134;msp_0226;msp_0245;msp_0594;msp_0603c;msp_0656;msp_0700;msp_0913;msp_1044;msp_1151;msp_1838;msp_0199;msp_0538;msp_0580;msp_0889	Bilophila wadsworthia;Megamonas funiformis == rupellensis;Desulfovibrionaceae bacterium CIM:MAG 900;Megasphaera massiliensis;Phascolarctobacterium sp. CAG:266;Selenomonas artemidis;Succinatimonas sp. UBA2849 & sp. CAG:777;Megasphaera sp. ASD88 & An286 & AJH120;unclassified Succinivibrionaceae;unclassified Fusobacterium;unclassified Succinivibrionaceae;unclassified Fusobacterium;Muribaculaceae bac…	-	-	K20531;K20532;K20533;K07344;K20530;K20527	-	-	-	-	-	-	-	K20531;K20532;K20533;K07344;K20530;K20527
CL-679	3	16	Yes	No	msp_0005;msp_0044;msp_0056;msp_0057;msp_0231;msp_0338;msp_0347;msp_0484;msp_0583;msp_0587;msp_0648;msp_0770;msp_0831;msp_0852;msp_0853c;msp_1156	Escherichia coli;Hungatella hathewayi 1;unclassified Lachnoclostridium;Roseburia sp. CAG:45 & sp. 2789STDY5608886;unclassified_Erysipelotrichaceae;Fusobacterium mortiferum;Clostridium paraputrificum;unclassified Faecalibacterium;unclassified Fournierella;unclassified Fusobacterium;Holdemanella biformis;unclassified Lachnoclostridium;Faecalicoccus pleomorphus;Absiella dolichum;Granulicatella adiac…	-	-	-	YhfT;YhfZ_C;DUF2620	-	-	-	-	-	-	YhfT;YhfZ_C;DUF2620
CL-82	7	15	Yes	No	msp_0408;msp_0600c;msp_0843;msp_1006;msp_1222;msp_1237;msp_0403;msp_0691;msp_0712;msp_0866c;msp_0925;msp_1089;msp_1196;msp_1220;msp_1265	Lactobacillus mucosae;Weissella cibaria;Weissella confusa;Lactobacillus fermentum;Lactobacillus vaginalis;Lactobacillus reuteri;Enterococcus faecium;Lactobacillus amylovorus;Lactobacillus salivarius;Lactobacillus agilis;Lactobacillus paragasseri;Lactobacillus casei == paracasei;Lactobacillus crispatus;LactobacillusÊvaginalis 2;Lactobacillus johnsonii	-	-	K02859	DUF2507;DUF4811;DUF2929;YycH	lmo0645;lmo1769	-	-	-	-	Uncharacterized amino acid permease, GabP family;Phosphoribosylformylglycinamidine synthase, synthetase subunit (EC 6.3.5.3)	DUF2507;DUF4811;DUF2929;YycH;K02859;lmo0645;lmo1769
CL-662	4	15	Yes	No	msp_0024;msp_0044;msp_0045;msp_0047;msp_0080;msp_0222;msp_0260;msp_0271;msp_0290;msp_0472;msp_0546;msp_0709;msp_1005;msp_1037;msp_0737	Hungatella effluvii;Hungatella hathewayi 1;Ruminococcus bromii 2;[Eubacterium] sp. CAG:115;Prevotellamassilia timonensis;[Clostridium] sp. CAG:354_28_25;Prevotella lascolaii;[Eubacterium] sp. CAG:180;Anaeromassilibacillus sp. Marseille-P3876;unclassified Clostridiales Family XIII. Incertae Sedis;[Clostridium] sp. CAG:245 & CIM:MAG 941;Firmicutes bacterium CAG:341;[Clostridium] sp. CAG:508;unclass…	-	-	-	FokI_C;FokI_N;Type2_restr_D3;Endonuc-FokI_C	-	-	-	-	-	-	FokI_C;FokI_N;Type2_restr_D3;Endonuc-FokI_C
CL-289	3	15	Yes	No	msp_0030;msp_0108;msp_0131;msp_0140;msp_0145;msp_0174;msp_0209;msp_0403;msp_0413;msp_0538;msp_0544c;msp_0618;msp_0691;msp_0869;msp_1766	Klebsiella pneumoniae;Enterobacter hormaechei;Phascolarctobacterium faecium;Klebsiella oxytoca;Parasutterella excrementihominis;Klebsiella quasipneumoniae;Enterobacter roggenkampii;Enterococcus faecium;unclassified Phascolarctobacterium;Phascolarctobacterium succinatutens;Escherichia fergusonii;Turicimonas muris;Lactobacillus amylovorus;unclassified Acidaminococcaceae;Enterobacter ludwigii	-	-	K13934;K13931	MdcG	-	-	-	-	-	-	K13934;MdcG;K13931
CL-76	3	14	Yes	No	msp_0003;msp_0008;msp_0010;msp_0019;msp_0031;msp_0033;msp_0036;msp_0037;msp_0054;msp_0063;msp_0235;msp_0336;msp_0485;msp_0520c	Bacteroides cellulosilyticus;Bacteroides intestinalis;Bacteroides fragilis 1;Bacteroides faecis;Bacteroides stercoris;Bacteroides fragilis 2;Bacteroides eggerthii;Bacteroides salyersiae;Bacteroides nordii;Bacteroides clarus;unclassified Bacteroides;Bacteroides fluxus;unclassified Bacteroides;Bacteroides gallinarum	-	-	K14597	DUF4943;UpxZ	-	-	-	-	-	-	DUF4943;K14597;UpxZ
CL-466	3	14	Yes	No	msp_0015;msp_0017;msp_0042;msp_0047;msp_0060;msp_0072;msp_0094;msp_0237;msp_0243;msp_0294;msp_0371;msp_0539;msp_0604;msp_0677c	Roseburia faecis;Roseburia intestinalis;Coprococcus eutactus 2;[Eubacterium] sp. CAG:115;Lachnospiraceae bacterium CIM:MAG 844 / Firmicutes bacterium CAG:95;Roseburia inulinivorans;unclassified Roseburia;Roseburia sp. CAG:182;[Clostridium] sp. CAG:253;Butyrivibrio sp. CAG:318;unclassified Roseburia;unclassified Roseburia;Dorea sp. CAG:105;Slackia exigua	-	-	K21006	Glyco_hydro_114	-	cazy.GH114	-	-	-	-	K21006;Glyco_hydro_114;cazy.GH114
CL-555	3	14	Yes	No	msp_0110;msp_0195;msp_0226;msp_0295;msp_0369;msp_0585;msp_0896;msp_0924;msp_1018;msp_1087;msp_1311;msp_1318;msp_1387;msp_1639	Bilophila wadsworthia;Desulfovibrio piger;Desulfovibrionaceae bacterium CIM:MAG 900;Desulfovibrio fairfieldensis;uncultured Desulfovibrio sp. RUG514;Methanobrevibacter smithii 1;Candidatus Methanomassiliicoccus intestinalis;Methanobrevibacter smithii 2;Candidatus Methanomethylophilus alvus / Methanoculleus sp. CAG:1088;unclassified Mailhella;Methanosphaera stadtmanae;unclassified Methanomassiliic…	M00035:Methionine degradation	Cysteine and methionine metabolism	K11646;K14168	DHQS	-	-	-	-	-	-	K11646;DHQS;K14168
CL-17	67	13	Yes	No	msp_0263;msp_0570;msp_0138;msp_0166;msp_0878;msp_0419;msp_0627;msp_0916;msp_1099c;msp_1155;msp_0910;msp_0437c;msp_0469c	Bifidobacterium adolescentis;Bifidobacterium dentium;Bifidobacterium pseudocatenulatum;Bifidobacterium longum;Bifidobacterium gallinarum == saeculare ;Bifidobacterium bifidum;Bifidobacterium breve;Bifidobacterium animalis;Bifidobacterium thermacidophilum;Bifidobacterium angulatum;Bifidobacterium catenulatum;Actinomyces oris;Bifidobacterium scardovii	M00342:Bacterial proteasome ;M00581:Biotin transport system ;M00760:Erythromycin resistance, macrolide 2'-phosphotransferase I MphA	Proteasome;Metallic cation, iron-siderophore and vitamin B12 transport system;Drug resistance	K04092;K06979;K09009;K11533;K13527;K13570;K13571;K13829;K16784;K18955;K20814;K07503;K13181;K13955;K16028;K12954;K07442	CrgA;DUF1729;DUF1964;DUF2183;DUF2469;DUF3000;DUF3027;DUF3039;DUF3043;DUF3046;DUF3052;DUF3071;DUF3073;DUF3107;DUF3152;DUF3159;DUF3180;DUF3416;DUF3566;DUF3710;DUF4032;DUF4191;DUF4193;DUF4235;DUF4244;DUF4916;DUF501;GCD14_N;OpcA_G6PD_assem;PAC2;Prot_ATP_ID_OB;Pup;Pup_ligase;RbpA;THDPS_M;Whib;Zincin_2;DUF4192;Excalibur	Rv0757;Rv2745c;Rv2987c;Rv3583c;Rv3664c;Rv3665c;Rv2583c;Rv0046c	cazy.GH13_30;cazy.GH13_3;cazy.GH13_32	-	-	-	Inositol-1-phosphate synthase (EC 5.5.1.4);DNA-binding response regulator PhoP;Guanosine-3',5'-bis(diphosphate) 3'-pyrophosphohydrolase (EC 3.1.7.2) / GTP pyrophosphokinase (EC 2.7.6.5), (p)ppGpp synthetase II;Putative transcriptional regulatory protein;3-isopropylmalate dehydratase small subunit (EC 4.2.1.33);Dipeptide ABC transporter, permease protein DppC (TC 3.A.1.5.2);Dipeptide ABC transport…	cazy.GH13_30;Rv0757;Rv2745c;Rv2987c;Rv3583c;Rv3664c;Rv3665c;K04092;K06979;K09009;K11533;K13527;K13570;K13571;K13829;K16784;K18955;K20814;CrgA;DUF1729;DUF1964;DUF2183;DUF2469;DUF3000;DUF3027;DUF3039;DUF3043;DUF3046;DUF3052;DUF3071;DUF3073;DUF3107;DUF3152;DUF3159;DUF3180;DUF3416;DUF3566;DUF3710;DUF4032;DUF4191;DUF4193;DUF4235;DUF4244;DUF4916;DUF501;GCD14_N;OpcA_G6PD_assem;PAC2;Prot_ATP_ID_OB;Pup;Pu…
CL-509	3	13	Yes	No	msp_0229;msp_0260;msp_0287;msp_0324;msp_0335;msp_0381;msp_0429;msp_0637;msp_0815;msp_0849;msp_1026;msp_1209;msp_1618	Prevotella sp. 885;Prevotella lascolaii;Alistipes ihumii;Alistipes sp. cv1;unclassified Alistipes;Alistipes senegalensis;Alistipes timonensis;Alistipes sp. Marseille-P2431;unclassified Alistipes;unclassified Alistipes;unclassified Alistipes;unclassified Alistipes;Alistipes sp. An54 & An116	-	-	K05286	Glyco_transf_22	-	cazy.GT22	-	-	-	-	K05286;Glyco_transf_22;cazy.GT22
CL-157	3	12	Yes	No	msp_0001;msp_0002;msp_0004;msp_0006;msp_0110;msp_0195;msp_0295;msp_0369;msp_0936c;msp_1387;msp_1639;msp_1848	Blastocystis sp. subtype 3;Blastocystis sp. subtype 1;Blastocystis sp. subtype 2;Blastocystis sp. subtype 4;Bilophila wadsworthia;Desulfovibrio piger;Desulfovibrio fairfieldensis;uncultured Desulfovibrio sp. RUG514;Helicobacter winghamensis;unclassified Desulfovibrio;Desulfovibrio sp. An276;unclassified Desulfovibrio	-	-	K07151	STT3	-	cazy.GT66	-	-	-	-	K07151;STT3;cazy.GT66
CL-409	3	12	Yes	No	msp_0030;msp_0092;msp_0108;msp_0140;msp_0145;msp_0174;msp_0209;msp_0403;msp_0618;msp_1019;msp_1432;msp_1815	Klebsiella pneumoniae;Sutterella wadsworthensis 1;Enterobacter hormaechei;Klebsiella oxytoca;Parasutterella excrementihominis;Klebsiella quasipneumoniae;Enterobacter roggenkampii;Enterococcus faecium;Turicimonas muris;Oxalobacter formigenes 1;Citrobacter koseri;Enterobacter mori	-	-	K13935;K13932;K13930	-	-	-	-	-	-	-	K13935;K13932;K13930
CL-666	3	12	Yes	No	msp_0329;msp_0333;msp_0403;msp_0602c;msp_0742;msp_0832;msp_0925;msp_1089;msp_1127;msp_1265;msp_1547c;msp_1748	Clostridium butyricum;Lactobacillus ruminis;Enterococcus faecium;Streptococcus infantis 2;Streptococcus parasanguinis;Streptococcus pasteurianus;Lactobacillus paragasseri;Lactobacillus casei == paracasei;Streptococcus anginosus;Lactobacillus johnsonii;Lactobacillus farciminis;Streptococcus gordonii	M00731:Bacitracin transport system ;M00737:Bacitracin resistance, VraDE transporter	ABC-2 type and other transport systems;Drug efflux transporter/pump	K20113;K20114;K20112	-	-	-	-	-	-	-	K20113;K20114;K20112
CL-63	34	11	Yes	No	msp_0742;msp_1127;msp_0146c;msp_0380;msp_0602c;msp_0832;msp_0983;msp_1477;msp_0833;msp_1341;msp_1543	Streptococcus parasanguinis;Streptococcus anginosus;Streptococcus sanguinis;Streptococcus salivarius;Streptococcus infantis 2;Streptococcus pasteurianus;Streptococcus lutetiensis;Streptococcus mutans;Streptococcus thermophilus;Streptococcus infantarius;Streptococcus oralis	M00569:Catechol meta-cleavage, catechol => acetyl-CoA / 4-methylcatechol => propanoyl-CoA ;M00791:Manganese/zinc transport system	Aromatics degradation;Metallic cation, iron-siderophore and vitamin B12 transport system	K11622;K12296;K12556;K20073;K03693;K07104;K10830;K19971;K19972	Bile_Hydr_Trans;CppA_N;DNA_PPF;DUF1803;DUF3165;DUF3270;DUF3272;DUF3484;DUF4059;DUF4649;DUF4651;DUF536;PulG;DUF1033;EpuA;Strep_his_triad;CppA_C;DUF3013;DUF1912;DUF3642	lmo0153;lmo0155;lmo0154;lmo1847	cazy.GH13_12	-	-	-	Zinc ABC transporter, substrate-binding lipoprotein AdcA;Zinc ABC transporter, ATP-binding protein AdcC;Zinc ABC transporter, permease protein AdcB;Manganese ABC transporter, periplasmic-binding protein SitA	lmo0153;lmo0155;K11622;K12296;K12556;K20073;Bile_Hydr_Trans;CppA_N;DNA_PPF;DUF1803;DUF3165;DUF3270;DUF3272;DUF3484;DUF4059;DUF4649;DUF4651;DUF536;PulG;cazy.GH13_12;lmo0154;lmo1847;K03693;K07104;K10830;K19971;K19972;DUF1033;EpuA;Strep_his_triad;CppA_C;DUF3013;DUF1912;DUF3642
CL-7	9	11	Yes	No	msp_0178;msp_0282;msp_0262;msp_0286;msp_0325;msp_0367;msp_0405;msp_0717;msp_0210;msp_0752;msp_1575	Ruminococcus sp. A254.MGS-254 & CAG:254;Ruminococcus sp. CAG:330;Ruminococcus callidus;Ruminococcus sp. 37_24 & sp. 2789STDY5834934;Ruminococcus sp. UNK.MGS-30;Ruminococcus champanellensis;Ruminococcus sp. CAG:403;unclassified Ruminococcus;unclassified Ruminococcus;Ruminococcus sp. CAG:624 & UBA6407 & UBA4697;unclassified Ruminococcus	-	-	K20829	CBM_3;Glyco_hydro_48	-	cazy.CBM79;cazy.GH48;cazy.GH5_1;cazy.CBM78;cazy.CBM76;cazy.CBM3	-	-	-	-	cazy.CBM79;cazy.GH48;cazy.GH5_1;K20829;CBM_3;Glyco_hydro_48;cazy.CBM78;cazy.CBM76;cazy.CBM3
CL-443	8	11	Yes	No	msp_0005;msp_0212;msp_0215;msp_0359;msp_0426;msp_0715c;msp_1040c;msp_1019;msp_0081;msp_0100;msp_0366	Escherichia coli;Dialister invisus;Dialister sp. Marseille-P5638 & CAG:357;Mitsuokella jalaludinii;Dialister sp. CAG:486;Aggregatibacter segnis;Colibacter massiliensis;Oxalobacter formigenes 1;unclassified Prevotella;Morganella morganii;unclassified Caecibacter	-	-	K19128;K19130;K19127;K19129	Cas_Csy1;Cas_Csy2;Cas_Csy3;Cas_Csy4	-	-	-	-	-	-	K19128;K19130;Cas_Csy1;Cas_Csy2;K19127;K19129;Cas_Csy3;Cas_Csy4
CL-141	5	11	Yes	No	msp_0167c;msp_0844c;msp_0963c;msp_1205;msp_1432;msp_0110;msp_0295;msp_0936c;msp_1523;msp_1770;msp_1818	Plesiomonas shigelloides;Campylobacter concisus 2;Campylobacter hominis;Comamonas kerstersii;Citrobacter koseri;Bilophila wadsworthia;Desulfovibrio fairfieldensis;Helicobacter winghamensis;Desulfovibrio sp. Dsv1;unclassified Achromobacter;unclassified Saccharopolyspora	M00151:Cytochrome bc1 complex respiratory unit	ATP synthesis	K00412	Cytochrom_B_C;Cytochrom_B_N_2;Cytochrome_B;Cytochrom_C1	-	-	-	-	-	-	Cytochrom_B_C;Cytochrom_B_N_2;Cytochrome_B;Cytochrom_C1;K00412
CL-203	3	11	Yes	No	msp_0020;msp_0024;msp_0044;msp_0066;msp_0172;msp_0360;msp_0402;msp_0407;msp_0418;msp_0770;msp_1437	[Clostridium] clostridioforme 1;Hungatella effluvii;Hungatella hathewayi 1;[Clostridium] sp. AT4;Ruthenibacterium lactatiformans;[Clostridium] asparagiforme == lavalense;unclassified Lachnoclostridium;unclassified Gemmiger;unclassified Gemmiger;unclassified Lachnoclostridium;unclassified Lachnoclostridium	M00274:PTS system, mannitol-specific II component	Phosphotransferase system (PTS)	K17242;K17241;K17243	-	-	-	-	-	-	-	K17242;K17241;K17243
CL-325	3	11	Yes	No	msp_0014;msp_0403;msp_0486;msp_0497;msp_0600c;msp_0712;msp_0843;msp_1089;msp_1208;msp_1410;msp_1489c	Eisenbergiella tayi;Enterococcus faecium;Lactococcus lactis subsp. lactis;Enterococcus faecalis;Weissella cibaria;Lactobacillus salivarius;Weissella confusa;Lactobacillus casei == paracasei;unclassified Lactobacillus;Lactococcus lactis subsp. cremoris;Enterococcus gallinarum	M00792:Manganese/zinc transport system	Metallic cation, iron-siderophore and vitamin B12 transport system	-	DUF916;WxL;DUF3324	-	-	-	-	-	-	DUF916;WxL;DUF3324
CL-506	3	11	Yes	No	msp_0014;msp_0060;msp_0108;msp_0125;msp_0130;msp_0134;msp_0328;msp_0382;msp_1075;msp_1149;msp_1154	Eisenbergiella tayi;Lachnospiraceae bacterium CIM:MAG 844 / Firmicutes bacterium CAG:95;Enterobacter hormaechei;Firmicutes bacterium CAG:24 / [Clostridium] sp. 2789STDY5834869 & 2789STDY5834922;Candidatus Gastranaerophilales bacterium x14;Megamonas funiformis == rupellensis;[Brachyspira] sp. CAG:484;unclassified Lachnospiraceae;unclassified Lentisphaerae;unclassified Lachnospiraceae;uncultured ba…	-	-	K00737	Glyco_transf_17	-	cazy.GT17	-	-	-	-	K00737;Glyco_transf_17;cazy.GT17
CL-546	3	11	Yes	No	msp_0030;msp_0083;msp_0110;msp_0226;msp_0295;msp_0465;msp_0503;msp_0532;msp_1076;msp_1182;msp_1331	Klebsiella pneumoniae;Parabacteroides johnsonii;Bilophila wadsworthia;Desulfovibrionaceae bacterium CIM:MAG 900;Desulfovibrio fairfieldensis;unclassified Opitutae;Coraliomargarita sp. CAG:312;unclassified Opitutae;unclassified Bilophila;Verrucomicrobia bacterium CIM:MAG 792_1;Hafnia paralvei	M00004:Pentose phosphate pathway (Pentose phosphate cycle) ;M00006:Pentose phosphate pathway, oxidative phase, glucose 6P => ribulose 5P ;M00008:Entner-Doudoroff pathway, glucose-6P => glyceraldehyde-3P + pyruvate	Central carbohydrate metabolism	K06152;K06151	Gluconate_2-dh3	-	-	-	-	-	-	K06152;Gluconate_2-dh3;K06151
CL-8	56	10	Yes	No	msp_0375;msp_0170;msp_0642;msp_0795;msp_0830;msp_0895;msp_0695;msp_0220;msp_0788;msp_0718	Azospirillum sp. 47_25 & CAG:260;Azospirillum sp. CAG:239;Proteobacteria bacterium CAG:495;unclassified Rhodospirillaceae;unclassified Rhodospirillaceae;Acetobacter sp. CAG:977;unclassified Rhodospirillales;Azospirillum sp. 51_20;unclassified Rhodospirillaceae;unclassified Rhodospirillales	M00333:Type IV secretion system ;M00512:CckA-CtrA/CpdR (cell cycle control) two-component regulatory system ;M00564:Helicobacter pylori pathogenicity signature, cagA pathogenicity island	Bacterial secretion system;Two-component regulatory system;Pathogenicity	K17804;K07556;K09987;K13583;K13588;K16561;K03199;K03203;K03196;K09985;K12049;K03195;K13584;K06601;K06602;K10565;K10934;K01458;K00207;K12282;K13702;K01120;K16080;K02487;K07018;K03202;K07276	DUF1013;DUF1150;DUF2312;DUF3015;DUF4167;RHH_4;CDP-OH_P_tran_2;DUF2155;DUF3646;DUF2125;DUF2497;DUF3035;DUF3576;DUF3659;FlaF;FlbT;FliX;PilS;TcpQ;Mito_fiss_Elm1;ATP12;DUF2336;DUF3750;GcrA;Nfu_N;DUF2934;HPTransfase;AsmA_1;DUF3768	-	-	-	-	-	-	K17804;K07556;K09987;K13583;K13588;K16561;DUF1013;DUF1150;DUF2312;DUF3015;DUF4167;RHH_4;K03199;K03203;K03196;K09985;K12049;CDP-OH_P_tran_2;DUF2155;DUF3646;K03195;K13584;K06601;K06602;K10565;DUF2125;DUF2497;DUF3035;DUF3576;DUF3659;FlaF;FlbT;FliX;PilS;TcpQ;Mito_fiss_Elm1;K10934;K01458;K00207;ATP12;K12282;K13702;K01120;DUF2336;DUF3750;GcrA;Nfu_N;K16080;DUF2934;HPTransfase;K02487;K07018;AsmA_1;DUF376…
CL-386	7	10	Yes	No	msp_0025;msp_0070;msp_0201;msp_0411;msp_0465;msp_0503;msp_0532;msp_0672;msp_1182;msp_0557	Akkermansia muciniphila;Akkermansia muciniphila 2;Akkermansia sp. KLE1605;unclassified Akkermansia;unclassified Opitutae;Coraliomargarita sp. CAG:312;unclassified Opitutae;unclassified Opitutae;Verrucomicrobia bacterium CIM:MAG 792_1;unclassified Akkermansiaceae	-	-	K06045;K07512	DUF2219;DUF3485;Methyltransf_28;Na_H_antiport_3;Ribonuc_red_2_N	-	-	-	-	-	-	K06045;DUF2219;DUF3485;Methyltransf_28;Na_H_antiport_3;Ribonuc_red_2_N;K07512
CL-435	4	10	Yes	No	msp_0148c;msp_0313;msp_0483;msp_0884;msp_0923;msp_0968c;msp_1219;msp_1329;msp_1799;msp_1294	Veillonella infantium;Veillonella parvula;Veillonella sp. CAG:933;Veillonella atypica;Veillonella seminalis;Veillonella magna;Veillonella rogosae;Veillonella tobetsuensis;unclassified Veillonella;unclassified Veillonella	-	-	K16014;K00435	Chlor_dismutase;Porin_5	-	-	-	-	-	-	K16014;Chlor_dismutase;Porin_5;K00435
CL-147	3	10	Yes	No	msp_0001;msp_0006;msp_0110;msp_0119;msp_0603c;msp_0998;msp_1432;msp_1613;msp_1766;msp_1822	Blastocystis sp. subtype 3;Blastocystis sp. subtype 4;Bilophila wadsworthia;unclassified Acidaminococcaceae;Selenomonas artemidis;unclassified Candidatus Gastranaerophilales;Citrobacter koseri;unclassified Selenomonadaceae;Enterobacter ludwigii;unclassified Selenomonas	-	-	K09667	Glyco_transf_41	-	cazy.GT41	-	-	-	-	Glyco_transf_41;cazy.GT41;K09667
CL-187	3	10	Yes	No	msp_0005;msp_0103;msp_0160;msp_0278;msp_0479;msp_0831;msp_0852;msp_0949;msp_1156;msp_1331	Escherichia coli;[Clostridium] innocuum;[Faecalitalea] sp. UBA637;Erysipelotrichaceae bacterium 3_1_53;[Eubacterium] sp. Marseille-P5640;Faecalicoccus pleomorphus;Absiella dolichum;unclassified_Erysipelotrichaceae;Solobacterium moorei;Hafnia paralvei	-	-	K10985;K10986	-	b3139	-	-	-	-	PTS system, galactosamine-specific IIC component	K10985;b3139;K10986
CL-201	3	10	Yes	No	msp_0015;msp_0042;msp_0179;msp_0183;msp_0362;msp_0441;msp_0454;msp_0989;msp_1677;msp_1716	Roseburia faecis;Coprococcus eutactus 2;Coprococcus eutactus 1;[Acetobacter] sp. 46_36 & CAG:267 / Alphaproteobacteria bacterium UBA7083;Clostridium saudiense;unclassified Roseburia;unclassified Clostridium;unclassified Coprococcus;unclassified Clostridium;unclassified Roseburia	-	-	-	CBM_11	-	cazy.CBM27;cazy.CBM23	-	-	-	-	cazy.CBM27;CBM_11;cazy.CBM23
CL-291	3	10	Yes	No	msp_0038;msp_0073;msp_0099;msp_0116;msp_0120;msp_0159;msp_0255;msp_0585;msp_0924;msp_1025	unclassified Lentisphaeria;Victivallales bacterium CCUG 44730;Lentisphaeria bacterium UBA1829;unclassified Lentisphaeria;unclassified Victivallales;Victivallis vadensis;unclassified Victivallales;Methanobrevibacter smithii 1;Methanobrevibacter smithii 2;unclassified Lentisphaerae	M00048:Inosine monophosphate biosynthesis, PRPP + glutamine => IMP	Purine metabolism	K00187;K11176;K00186	-	-	-	-	-	-	-	K00187;K11176;K00186
CL-394	3	10	Yes	No	msp_0005;msp_0030;msp_0145;msp_0202;msp_0251;msp_0280;msp_0288;msp_0414;msp_0618;msp_0967	Escherichia coli;Klebsiella pneumoniae;Parasutterella excrementihominis;[Acinetobacter] sp. N54.MGS-139 / Proteobacteria bacterium CAG:139;unclassified Prevotella;Sutterella wadsworthensis 2;unclassified Sutterellaceae;Duodenibacillus massiliensis;Turicimonas muris;unclassified Sutterella	-	-	K12061;K12066;K12068	-	-	-	-	-	-	-	K12061;K12066;K12068
CL-495	3	10	Yes	No	msp_0084;msp_0236;msp_0378;msp_0551;msp_0630;msp_0892;msp_1106;msp_1407;msp_1662;msp_1930	Prevotella sp. RUG457 & sp. RUG782 & sp. CAG:386;[Eubacterium] ventriosum;[Eubacterium] sp. CAG:156;[Eubacterium] sp. CAG:192;[Eubacterium] sp. CAG:161;unclassified Lachnospiraceae;unclassified Prevotella;unclassified Lachnospiraceae;unclassified Lachnospiraceae;unclassified Lachnospiraceae	-	-	-	Crystall;Glyco_hydro_64	-	cazy.GH64	-	-	-	-	Crystall;Glyco_hydro_64;cazy.GH64
CL-629	3	10	Yes	No	msp_0014;msp_0018;msp_0020;msp_0085;msp_0109;msp_0113;msp_0132;msp_0180;msp_0237;msp_0278	Eisenbergiella tayi;Eisenbergiella massiliensis;[Clostridium] clostridioforme 1;unclassified Eisenbergiella;[Clostridium] scindens 2;Blautia producta 2;Coprobacillus cateniformis;Blautia coccoides == Blautia producta;Roseburia sp. CAG:182;Erysipelotrichaceae bacterium 3_1_53	M00325:alpha-Hemolysin/cyclolysin transport system ;M00575:Pertussis pathogenicity signature, T1SS	Bacterial secretion system;Pathogenicity	K16906;K16907;K16905	-	-	-	-	-	-	-	K16906;K16907;K16905
CL-35	22	9	Yes	No	msp_0110;msp_0195;msp_0226;msp_0749;msp_1092;msp_1823;msp_0092;msp_1276;msp_2209	Bilophila wadsworthia;Desulfovibrio piger;Desulfovibrionaceae bacterium CIM:MAG 900;unclassified Sutterella;unclassified Sutterellaceae;unclassified Sutterella;Sutterella wadsworthensis 1;Succinatimonas hippei;unclassified Succinatimonas	M00332:Type III secretion system ;M00542:EHEC/EPEC pathogenicity signature, T3SS and effectors ;M00660:Xanthomonas spp. pathogenicity signature, T3SS and effectors	Bacterial secretion system;Pathogenicity;Plant pathogenicity	K04056;K03221;K03227;K03224;K03225;K03226;K03228;K03229;K03219;K03230;K04058;K03220;K03222;K03223;K04059	YscO;T3SS_needle_F;CesT;HrpJ;SseC;TyeA	SL1344_1349	-	-	-	-	Type III secretion cytoplasmic ATP synthase (EC 3.6.3.14, YscN,SpaL,MxiB,HrcN,EscN)	K04056;YscO;K03221;K03227;T3SS_needle_F;K03224;K03225;K03226;K03228;K03229;K03219;K03230;K04058;K03220;CesT;HrpJ;SseC;TyeA;K03222;K03223;K04059;SL1344_1349
CL-220	8	9	Yes	No	msp_0110;msp_0226;msp_0195;msp_0253;msp_0295;msp_0369;msp_1087;msp_1639;msp_1464	Bilophila wadsworthia;Desulfovibrionaceae bacterium CIM:MAG 900;Desulfovibrio piger;unclassified Bilophila;Desulfovibrio fairfieldensis;uncultured Desulfovibrio sp. RUG514;unclassified Mailhella;Desulfovibrio sp. An276;unclassified Bilophila	-	-	K00437;K03851;K18008	DUF4851;DsrD;DUF1844;ROS_MUCR;RsbRD_N	-	-	-	-	-	-	K00437;DUF4851;K03851;K18008;DsrD;DUF1844;ROS_MUCR;RsbRD_N
CL-107	3	9	Yes	No	msp_0289;msp_0574c;msp_0580;msp_0610;msp_0956;msp_1044;msp_1081;msp_1838;msp_1861	Fusobacterium varium;Fusobacterium necrophorum;unclassified Fusobacterium;Fusobacterium nucleatum subsp. animalis;Fusobacterium sp. clos_1_1;unclassified Fusobacterium;Fusobacterium gonidiaformans;unclassified Fusobacterium;unclassified Fusobacterium	M00080:Lipopolysaccharide biosynthesis, inner core => outer core => O-antigen	Lipopolysaccharide metabolism	K11995;K02850	WaaY	-	-	-	-	-	-	K11995;WaaY;K02850
CL-9	3	8	Yes	No	msp_0030;msp_0145;msp_0202;msp_0618;msp_0675;msp_0967;msp_0984;msp_1887	Klebsiella pneumoniae;Parasutterella excrementihominis;[Acinetobacter] sp. N54.MGS-139 / Proteobacteria bacterium CAG:139;Turicimonas muris;Sutterella sp. CAG:521;unclassified Sutterella;unclassified Sutterellaceae;unclassified Sutterella	-	-	K12062;K12059	TrbC_Ftype	-	-	-	-	-	-	K12062;TrbC_Ftype;K12059
CL-55	3	8	Yes	No	msp_1623;msp_1635;msp_1660;msp_1935;msp_1936;msp_2062;msp_2111;msp_2151	unclassified;unclassified;unclassified;unclassified;unclassified;unclassified;unclassified;unclassified	-	-	-	Peptidase_S77;Peptidase_S80;Gp23	-	-	-	-	-	-	Peptidase_S77;Peptidase_S80;Gp23
CL-98	3	8	Yes	No	msp_0347;msp_0362;msp_0454;msp_0697;msp_0760;msp_0792;msp_1820;msp_1866	Clostridium paraputrificum;Clostridium saudiense;unclassified Clostridium;Clostridium sp. CAG:221;Clostridium sp. 29_15 & CAG:265;Clostridium perfringens;Clostridium sp. CL-2;unclassified Clostridium	-	-	K18213;K06307	Staygreen	-	-	-	-	-	-	Staygreen;K18213;K06307
CL-163	3	8	Yes	No	msp_0012;msp_0027;msp_0028;msp_0083;msp_0098;msp_0156;msp_0264;msp_1814	Parabacteroides distasonis;Parabacteroides merdae;Parabacteroides goldsteinii;Parabacteroides johnsonii;Parabacteroides gordonii;unclassified Parabacteroides;Parabacteroides sp. SN4;unclassified Parabacteroides	M00436:Sulfonate transport system	Mineral and organic ion transport system	K00318	DUF5032;DUF4833	-	-	-	-	-	-	DUF5032;K00318;DUF4833
CL-166	3	8	Yes	No	msp_0403;msp_0408;msp_0497;msp_0712;msp_1006;msp_1089;msp_1208;msp_1237	Enterococcus faecium;Lactobacillus mucosae;Enterococcus faecalis;Lactobacillus salivarius;Lactobacillus fermentum;Lactobacillus casei == paracasei;unclassified Lactobacillus;Lactobacillus reuteri	-	-	K02076	DUF4828;PPO1_KFDV	-	-	-	-	-	-	DUF4828;K02076;PPO1_KFDV
CL-315	3	8	Yes	No	msp_0010;msp_0037;msp_0116;msp_0144;msp_0165;msp_0200;msp_0310;msp_0394	Bacteroides fragilis 1;Bacteroides salyersiae;unclassified Lentisphaeria;[Clostridium] sp. CAG:138;unclassified Lachnospiraceae;Anaerostipes caccae;Barnesiella sp. An22;unclassified Parabacteroides	-	-	K09127;K09000	Cas_Cmr3	-	-	-	-	-	-	K09127;Cas_Cmr3;K09000
CL-494	3	8	Yes	No	msp_0380;msp_0742;msp_0925;msp_1222;msp_1237;msp_1265;msp_1287;msp_1805	Streptococcus salivarius;Streptococcus parasanguinis;Lactobacillus paragasseri;Lactobacillus vaginalis;Lactobacillus reuteri;Lactobacillus johnsonii;Lactobacillus delbrueckii;Lactobacillus gasseri	M00193:Putative spermidine/putrescine transport system	Mineral and organic ion transport system	K20811	Glyco_hydro_68	-	cazy.GH68	-	-	-	-	K20811;Glyco_hydro_68;cazy.GH68
CL-550	3	8	Yes	No	msp_0005;msp_0110;msp_0253;msp_0288;msp_0414;msp_0936c;msp_1076;msp_1816	Escherichia coli;Bilophila wadsworthia;unclassified Bilophila;unclassified Sutterellaceae;Duodenibacillus massiliensis;Helicobacter winghamensis;unclassified Bilophila;Citrobacter braakii	-	-	K09689;K10107;K09688	-	-	-	-	-	-	-	K09689;K10107;K09688
CL-584	3	8	Yes	No	msp_0005;msp_0030;msp_0140;msp_0174;msp_0213;msp_0633;msp_0720;msp_1816	Escherichia coli;Klebsiella pneumoniae;Klebsiella oxytoca;Klebsiella quasipneumoniae;Flavonifractor plautii;Klebsiella michiganensis 1;[Clostridium] sp. CAG:1024;Citrobacter braakii	M00309:Non-phosphorylative Entner-Doudoroff pathway, gluconate/galactonate => glycerate	Central carbohydrate metabolism	K04073;K02554	AcetDehyd-dimer	-	-	-	-	-	-	K04073;AcetDehyd-dimer;K02554
CL-684	3	8	Yes	No	msp_0038;msp_0099;msp_0465;msp_0503;msp_0532;msp_0672;msp_1075;msp_1182	unclassified Lentisphaeria;Lentisphaeria bacterium UBA1829;unclassified Opitutae;Coraliomargarita sp. CAG:312;unclassified Opitutae;unclassified Opitutae;unclassified Lentisphaerae;Verrucomicrobia bacterium CIM:MAG 792_1	-	-	-	PSCyt2;PSD1;DUF1501	-	-	-	-	-	-	PSCyt2;PSD1;DUF1501
CL-10	1401	7	Yes	No	msp_0005;msp_0108;msp_0030;msp_0209;msp_0140;msp_0626;msp_0157	Escherichia coli;Enterobacter hormaechei;Klebsiella pneumoniae;Enterobacter roggenkampii;Klebsiella oxytoca;Citrobacter portucalensis;Klebsiella aerogenes	M00087:beta-Oxidation ;M00117:Ubiquinone biosynthesis, prokaryotes, chorismate => ubiquinone ;M00136:GABA biosynthesis, prokaryotes, putrescine => GABA ;M00417:Cytochrome o ubiquinol oxidase ;M00438:Nitrate/nitrite transport system ;M00191:Thiamine transport system ;M00300:Putrescine transport system ;M00192:Putative thiamine transport system ;M00194:Maltose/maltodextrin transport system ;M00225:…	Fatty acid metabolism;Cofactor and vitamin biosynthesis;Polyamine biosynthesis;ATP synthesis;Mineral and organic ion transport system;Saccharide, polyol, and lipid transport system;Phosphate and amino acid transport system;Peptide and nickel transport system;Metallic cation, iron-siderophore and vitamin B12 transport system;Drug efflux transporter/pump;Bacterial secretion system;Two-component reg…	K09018;K13650;K19234;K00137;K01484;K02457;K03485;K05526;K05778;K06447;K07008;K10110;K11391;K12957;K13918;K08964;K08967;K09701;K13936;K15577;K19585;K19837;K07169;K19063;K20547;K00427;K03291;K05517;K05775;K05984;K06074;K08324;K09915;K13938;K00276;K00455;K16077;K03862;K05358;K18981;K13816;K19215;K01087;K01521;K02438;K02505;K02679;K02680;K02681;K02682;K02846;K03212;K03468;K03591;K03807;K03838;K04334;…	DUF1158;DUF1328;DUF2534;DUF2554;HofP;MASE5;MbtH;YbhQ;YedD;AstA;AstB;CHASE8;CpxA_peri;DUF1120;DUF1365;DUF1615;DUF1996;DUF2955;DUF3461;DUF3833;Glyco_hydro_19;Phageshock_PspG;PLN_propep;DUF2222;DUF2501;DUF480;GST_C_4;HTH_46;MalM;BLUF;Cu_amine_oxid;SCPU;AlaE;AmpE;Bestrophin;CDH;ChaC;Cpta_toxin;CsgF;CSS-motif;DNA_pol3_delt_C;DUF1176;DUF1190;DUF2502;DUF2509;DUF2593;DUF2884;DUF3251;DUF3300;DUF3302;DUF35…	SL1344_1478;Z3841;SL1344_1097;STM474_1538;Z2751;c1071;SF3718;STM474_2196;c0482;S0967;SF2299;SL1344_0257;SL1344_0729;SL1344_1277;SL1344_1520;SL1344_1877;STM14_1016;STM14_1303;STM14_1408;STM14_4216;STM474_1300;STM474_1451;STM474_2606;Z0118;Z0469;Z4136;APECO1_O1CoBM170;APECO1_O1CoBM171;BWG_0834;SFV_3854;STM14_0635;APECO1_O1CoBM139;APECO1_O1CoBM141;APECO1_O1CoBM137;b2095;BWG_0833;BWG_0835;c1633;c1803…	cazy.GH13_26;cazy.CBM73;cazy.GH153;cazy.GH13_21	tetX	siderophore	-	Outer Membrane Siderophore Receptor IroN;Trilactone hydrolase IroD;Glycosyltransferase IroB;Aerobactin siderophore receptor IutA @ TonB-dependent siderophore receptor;Aerobactin synthase (EC 6.3.2.39), aerobactin biosynthesis protein IucC;N6-hydroxylysine O-acetyltransferase (EC 2.3.1.102), aerobactin biosynthesis protein IucB @ Siderophore synthetase small component, acetyltransferase;Outer memb…	SL1344_1478;K09018;K13650;K19234;DUF1158;DUF1328;DUF2534;DUF2554;HofP;MASE5;MbtH;YbhQ;YedD;cazy.GH13_26;Z3841;K00137;K01484;K02457;K03485;K05526;K05778;K06447;K07008;K10110;K11391;K12957;K13918;K08964;K08967;K09701;K13936;K15577;K19585;K19837;K07169;K19063;K20547;AstA;AstB;CHASE8;CpxA_peri;DUF1120;DUF1365;DUF1615;DUF1996;DUF2955;DUF3461;DUF3833;Glyco_hydro_19;Phageshock_PspG;PLN_propep;SL1344_109…
CL-243	4	7	Yes	No	msp_0005;msp_0100;msp_0228;msp_0544c;msp_0881;msp_1476;msp_1058c	Escherichia coli;Morganella morganii;Proteus mirabilis;Escherichia fergusonii;Haemophilus parainfluenzae;Haemophilus pittmaniae;Proteus genomosp. 6	-	-	K12139;K12144;K12142;K12145	-	-	-	-	-	-	-	K12139;K12144;K12142;K12145
CL-177	3	7	Yes	No	msp_0146c;msp_0497;msp_0853c;msp_1127;msp_1234;msp_1477;msp_1543	Streptococcus sanguinis;Enterococcus faecalis;Granulicatella adiacens;Streptococcus anginosus;Parvimonas micra;Streptococcus mutans;Streptococcus oralis	M00251:Teichoic acid transport system	ABC-2 type and other transport systems	K20382	Antigen_C;GbpC	-	-	-	-	-	-	Antigen_C;GbpC;K20382
CL-333	3	7	Yes	No	msp_0073;msp_0099;msp_0116;msp_0120;msp_0159;msp_0255;msp_0516	Victivallales bacterium CCUG 44730;Lentisphaeria bacterium UBA1829;unclassified Lentisphaeria;unclassified Victivallales;Victivallis vadensis;unclassified Victivallales;unclassified Victivallales	-	-	K20327	DUF3047;DUF3192	-	-	-	-	-	-	K20327;DUF3047;DUF3192
CL-490	3	7	Yes	No	msp_0022;msp_0031;msp_0123;msp_0156;msp_0176;msp_0475;msp_1981	Bacteroides finegoldii;Bacteroides stercoris;Prevotella sp. CAG:520;unclassified Parabacteroides;Prevotella sp. P4-65 & P4-76 & P5-60 & P5-119 & P5-125 & CAG:592;Prevotella sp. CAG:891;Prevotella sp. UBA7263 & UBA7283 & RUG423 & RUG136 & RUG144	-	-	-	Reprolysin_3;Reprolysin_4;Reprolysin_2	-	-	-	-	-	-	Reprolysin_3;Reprolysin_4;Reprolysin_2
CL-1333	3	7	Yes	No	msp_0280;msp_0288;msp_0414;msp_0724;msp_0801;msp_0937;msp_1205	Sutterella wadsworthensis 2;unclassified Sutterellaceae;Duodenibacillus massiliensis;unclassified Sutterellaceae;Sutterella parvirubra;unclassified Sutterellaceae;Comamonas kerstersii	-	-	K17230;K17229	FCSD-flav_bind	-	-	-	-	-	-	K17230;FCSD-flav_bind;K17229
CL-265	5	6	Yes	No	msp_0131;msp_0413;msp_0538;msp_0869;msp_0396;msp_0544c	Phascolarctobacterium faecium;unclassified Phascolarctobacterium;Phascolarctobacterium succinatutens;unclassified Acidaminococcaceae;Adlercreutzia equolifaciens;Escherichia fergusonii	M00778:Type II polyketide backbone biosynthesis, acyl-CoA + malonyl-CoA => polyketide	Biosynthesis of secondary metabolites	K20510;K20511;K20509;K20415;K05554	-	-	-	-	-	-	-	K20510;K20511;K20509;K20415;K05554
CL-436	4	6	Yes	No	msp_0167c;msp_0368c;msp_0656;msp_0913;msp_1151;msp_1463	Plesiomonas shigelloides;Aeromonas veronii;Succinatimonas sp. UBA2849 & sp. CAG:777;unclassified Succinivibrionaceae;unclassified Succinivibrionaceae;unclassified Succinivibrionaceae	-	-	K09938	DUF2066;DUF294_C;FleQ	-	-	-	-	-	-	DUF2066;DUF294_C;FleQ;K09938
CL-148	3	6	Yes	No	msp_0001;msp_0002;msp_0110;msp_0131;msp_0413;msp_0538	Blastocystis sp. subtype 3;Blastocystis sp. subtype 1;Bilophila wadsworthia;Phascolarctobacterium faecium;unclassified Phascolarctobacterium;Phascolarctobacterium succinatutens	-	-	K10908	RNA_pol;RPOL_N	-	-	-	-	-	-	RNA_pol;K10908;RPOL_N
CL-297	3	6	Yes	No	msp_0195;msp_0295;msp_0369;msp_0844c;msp_0936c;msp_1639	Desulfovibrio piger;Desulfovibrio fairfieldensis;uncultured Desulfovibrio sp. RUG514;Campylobacter concisus 2;Helicobacter winghamensis;Desulfovibrio sp. An276	M00176:Assimilatory sulfate reduction, sulfate => H2S ;M00596:Dissimilatory sulfate reduction, sulfate => H2S	Sulfur metabolism	K00958	ATP-sulfurylase;N_NLPC_P60	-	-	-	-	-	-	ATP-sulfurylase;N_NLPC_P60;K00958
CL-326	3	6	Yes	No	msp_0403;msp_0497;msp_0600c;msp_0843;msp_1089;msp_1208	Enterococcus faecium;Enterococcus faecalis;Weissella cibaria;Weissella confusa;Lactobacillus casei == paracasei;unclassified Lactobacillus	-	-	K19973;K19975;K19976	-	-	-	-	-	-	-	K19973;K19975;K19976
CL-595	3	6	Yes	No	msp_0005;msp_0030;msp_0092;msp_0202;msp_0280;msp_0963c	Escherichia coli;Klebsiella pneumoniae;Sutterella wadsworthensis 1;[Acinetobacter] sp. N54.MGS-139 / Proteobacteria bacterium CAG:139;Sutterella wadsworthensis 2;Campylobacter hominis	-	-	K03201;K03200	T4SS	-	-	-	-	-	-	K03201;T4SS;K03200
CL-664	3	6	Yes	No	msp_0119;msp_0131;msp_0195;msp_0245;msp_0366;msp_0413	unclassified Acidaminococcaceae;Phascolarctobacterium faecium;Desulfovibrio piger;Megasphaera massiliensis;unclassified Caecibacter;unclassified Phascolarctobacterium	M00604:Trehalose transport system	Saccharide, polyol, and lipid transport system	-	Phage_T7_Capsid;Phage_T7_tail;Phage_endo_I	-	-	-	-	-	-	Phage_T7_Capsid;Phage_T7_tail;Phage_endo_I
CL-687	3	6	Yes	No	msp_0007;msp_0011;msp_0019;msp_0022;msp_0026;msp_0097	Bacteroides ovatus;Bacteroides thetaiotaomicron;Bacteroides faecis;Bacteroides finegoldii;Paraprevotella clara;Paraprevotella xylaniphila	-	-	-	DUF5008;DUF5124;DUF5007	-	-	-	-	-	-	DUF5008;DUF5124;DUF5007
CL-1440	3	6	Yes	No	msp_0226;msp_0570;msp_0800;msp_0878;msp_0916;msp_1639	Desulfovibrionaceae bacterium CIM:MAG 900;Bifidobacterium dentium;Eggerthella sp. 51_9 & CAG:209;Bifidobacterium gallinarum == saeculare ;Bifidobacterium animalis;Desulfovibrio sp. An276	-	-	K19131;K19132	Cas_GSU0053	-	-	-	-	-	-	K19131;Cas_GSU0053;K19132
CL-20	334	5	Yes	No	msp_1018;msp_0896;msp_0992;msp_0585;msp_0924	Candidatus Methanomethylophilus alvus / Methanoculleus sp. CAG:1088;Candidatus Methanomassiliicoccus intestinalis;unclassified Methanomassiliicoccaceae;Methanobrevibacter smithii 1;Methanobrevibacter smithii 2	M00567:Methanogenesis, CO2 => methane ;M00357:Methanogenesis, acetate => methane ;M00356:Methanogenesis, methanol => methane ;M00563:Methanogenesis, methylamine/dimethylamine/trimethylamine;M00358:Coenzyme M biosynthesis ;M00849:C5 isoprenoid biosynthesis, mevalonate pathway, archaea ;M00836:Coenzyme F430 biosynthesis, sirohydrochlorin => coenzyme F430 ;M00264:DNA polymerase II complex, archaea ;…	Methane metabolism;Terpenoid backbone biosynthesis;Cofactor and vitamin biosynthesis;DNA polymerase;RNA polymerase;RNA processing;Ribosome;Proteasome	K00555;K02866;K02877;K02883;K02885;K02889;K02910;K02912;K02930;K02966;K02974;K02984;K02987;K02991;K02995;K03124;K03231;K03237;K03238;K03242;K03243;K03263;K03264;K03265;K03626;K03627;K04799;K04802;K06174;K06943;K06944;K06961;K06965;K07178;K07466;K07561;K07562;K07573;K07583;K08851;K09495;K10896;K11600;K12589;K14564;K14574;K15429;K15449;K15865;K18532;K21610;K00399;K00400;K00401;K00402;K01622;K02322;…	Archease;CDC48_2;Cdc6_C;CGI-121;DHNA;Diphthamide_syn;DKCLD;DNA_ligase_A_N;DNA_pol_E_B;DNA_primase_lrg;DNA_primase_S;dsDNA_bind;DUF1246;DUF1297;DUF1743;DUF2099;DUF2112;DUF357;DUF359;ECR1_N;eIF-5_eIF-2B;eIF-6;EIF_2_alpha;eIF2_C;EMC3_TMCO1;eRF1_1;eRF1_2;eRF1_3;FBPase_3;Fibrillarin;GTP_EFTU_D4;KH_6;KH_7;LSM;MCM_N;MCM_OB;MCR_alpha;MCR_alpha_N;MCR_C;MCR_D;MCR_gamma;MMR_HSR1_C;NAC;NMD3;NOG1;Nop;PCNA_N;P…	-	-	-	-	-	-	K00555;K02866;K02877;K02883;K02885;K02889;K02910;K02912;K02930;K02966;K02974;K02984;K02987;K02991;K02995;K03124;K03231;K03237;K03238;K03242;K03243;K03263;K03264;K03265;K03626;K03627;K04799;K04802;K06174;K06943;K06944;K06961;K06965;K07178;K07466;K07561;K07562;K07573;K07583;K08851;K09495;K10896;K11600;K12589;K14564;K14574;K15429;K15449;K15865;K18532;K21610;K00399;K00400;K00401;K00402;K01622;K02322;…
CL-231	20	5	Yes	No	msp_0201;msp_0025;msp_0411;msp_0070;msp_0557	Akkermansia sp. KLE1605;Akkermansia muciniphila;unclassified Akkermansia;Akkermansia muciniphila 2;unclassified Akkermansiaceae	M00257:Hemin transport system ;M00643:Multidrug resistance, efflux pump MexXY-OprM	ABC-2 type and other transport systems;Drug resistance	K07239;K09814;K08150;K10800;K18094;K18095;K10939;K07051;K13670;K19919	Galactosyl_T;Glyco_hydro_75;DUF2135;DUF3341;DUF5069;Metallopep;PurA;SHD1;DUF4126;Ntox16	-	-	-	-	-	-	Galactosyl_T;K07239;K09814;Glyco_hydro_75;K08150;K10800;K18094;K18095;DUF2135;DUF3341;DUF5069;Metallopep;PurA;SHD1;K10939;K07051;K13670;K19919;DUF4126;Ntox16
CL-219	10	5	Yes	No	msp_0465;msp_0532;msp_0503;msp_0672;msp_1182	unclassified Opitutae;unclassified Opitutae;Coraliomargarita sp. CAG:312;unclassified Opitutae;Verrucomicrobia bacterium CIM:MAG 792_1	M00509:WspE-WspRF (chemosensory) two-component regulatory system ;M00641:Multidrug resistance, efflux pump MexEF-OprN	Two-component regulatory system;Drug resistance	K07117;K13487;K13488;K13489;K13490;K20370;K18299	DUF3463;DUF3568	MMAR_2320	-	-	-	-	dTDP-4-amino-4,6-dideoxygalactose transaminase (EC 2.6.1.59)	K07117;K13487;K13488;K13489;K13490;DUF3463;DUF3568;K20370;K18299;MMAR_2320
CL-356	6	5	Yes	No	msp_0104;msp_0392;msp_0896;msp_1018;msp_1318	Emergencia timonensis;Firmicutes bacterium CAG:238;Candidatus Methanomassiliicoccus intestinalis;Candidatus Methanomethylophilus alvus / Methanoculleus sp. CAG:1088;unclassified Methanomassiliicoccaceae	M00563:Methanogenesis, methylamine/dimethylamine/trimethylamine	Methane metabolism	K16178;K16180;K16181;K16182;K14084	Dimeth_Pyl	-	-	-	-	-	-	K16178;K16180;K16181;K16182;Dimeth_Pyl;K14084
CL-381	4	5	Yes	No	msp_0038;msp_0073;msp_0116;msp_0159;msp_0248	unclassified Lentisphaeria;Victivallales bacterium CCUG 44730;unclassified Lentisphaeria;Victivallis vadensis;unclassified Lentisphaeria	-	-	K00518;K09744	Sod_Ni;DUF790	-	-	-	-	-	-	K00518;Sod_Ni;K09744;DUF790
CL-396	4	5	Yes	No	msp_0108;msp_0157;msp_0209;msp_1815;msp_1986	Enterobacter hormaechei;Klebsiella aerogenes;Enterobacter roggenkampii;Enterobacter mori;unclassified Akkermansiaceae	M00334:Type VI secretion system	Bacterial secretion system	K11897;K11898;K11902	ImpE	-	-	-	-	-	-	K11897;K11898;ImpE;K11902
CL-402	3	5	Yes	No	msp_0695;msp_0718;msp_0895;msp_1646;msp_1818	unclassified Rhodospirillales;unclassified Rhodospirillales;Acetobacter sp. CAG:977;unclassified Alphaproteobacteria;unclassified Saccharopolyspora	M00546:Purine degradation, xanthine => urea	Purine metabolism	K13482;K15371	Bac_GDH	-	-	-	-	-	-	K13482;Bac_GDH;K15371
CL-682	3	5	Yes	No	msp_0422;msp_0437c;msp_0621;msp_0860;msp_0935	Romboutsia timonensis;Actinomyces oris;Intestinibacter bartlettii;unclassified Intestinibacter;Peptostreptococcus anaerobius	-	-	-	MctB;TPPK_C;DUF3866	-	-	-	-	-	-	MctB;TPPK_C;DUF3866
CL-114	9	4	Yes	No	msp_0195;msp_0295;msp_0369;msp_1639	Desulfovibrio piger;Desulfovibrio fairfieldensis;uncultured Desulfovibrio sp. RUG514;Desulfovibrio sp. An276	-	-	K16885;K16886;K16887	APS-reductase_C;DUF4881;DUF5334;PUA_2;DUF1786	-	cazy.GT21	-	-	-	-	K16885;K16886;K16887;APS-reductase_C;DUF4881;DUF5334;PUA_2;cazy.GT21;DUF1786
CL-345	5	4	Yes	No	msp_0120;msp_0159;msp_0255;msp_0073	unclassified Victivallales;Victivallis vadensis;unclassified Victivallales;Victivallales bacterium CCUG 44730	-	-	K16190;K10951;K07199	SLC12;D123	-	-	-	-	-	-	K16190;K10951;SLC12;K07199;D123
CL-14	3	4	Yes	No	msp_0146c;msp_0602c;msp_1418c;msp_1543	Streptococcus sanguinis;Streptococcus infantis 2;Streptococcus mitis;Streptococcus oralis	M00496:ComD-ComE (competence) two-component regulatory system	Two-component regulatory system	K12295;K12294	PHtD_u1	-	-	-	-	-	-	K12295;K12294;PHtD_u1
CL-212	3	4	Yes	No	msp_0110;msp_0195;msp_0226;msp_0253	Bilophila wadsworthia;Desulfovibrio piger;Desulfovibrionaceae bacterium CIM:MAG 900;unclassified Bilophila	-	-	-	DUF3626;Holin_2-3;Glyco_trans_4_3	-	-	-	-	-	-	DUF3626;Holin_2-3;Glyco_trans_4_3
CL-268	3	4	Yes	No	msp_0368c;msp_0881;msp_1205;msp_1476	Aeromonas veronii;Haemophilus parainfluenzae;Comamonas kerstersii;Haemophilus pittmaniae	-	-	K07234	Copper-bind;NnrS	-	-	-	-	-	-	Copper-bind;NnrS;K07234
CL-622	3	4	Yes	No	msp_0034;msp_0314;msp_0437c;msp_0597	[Faecalibacterium] sp. CAG:74;unclassified Christensenellaceae-Catabacteriaceae;Actinomyces oris;unclassified Clostridiales 5	M00586:Putative amino-acid transport system	Phosphate and amino acid transport system	K17316;K17317;K17315	-	-	-	-	-	-	-	K17316;K17317;K17315
CL-236	56	3	Yes	No	msp_0626;msp_1816;msp_0005	Citrobacter portucalensis;Citrobacter braakii;Escherichia coli	M00545:Trans-cinnamate degradation, trans-cinnamate => acetyl-CoA ;M00455:TorS-TorR (TMAO respiration) two-component regulatory system ;M00697:Multidrug resistance, efflux pump MdtEF-TolC	Aromatic amino acid metabolism;Two-component regulatory system;Drug resistance	K01908;K04017;K05709;K05711;K07821;K18898;K18899;K08087;K19096;K19564;K03329;K03755;K05708;K05887;K07772;K08277;K08354;K00316;K05245;K11811;K01659;K07811;K08326;K18531;K00499;K06157;K11930;K07748	DUF1482;DUF2542;DUF2545;DUF4051;CaiF_GrlA;DUF1870;DUF2623;YebF;Tweety;Colicin_Pyocin;DUF1449	c2103;c2581;c3623;c4914;SL1344_1218;SL1344_1867;SL1344_3787;STM474_0388;STM474_0573;STM474_0892;Z2702;Z3632;Z5750;SF3931;STM2304;STM474_0647;SL1344_4000	-	-	-	-	Putative anti-FlhC(2)FlhD(4) factor YdiV;Colanic acid biosynthesis glycosyl transferase WcaE;Aerobactin siderophore receptor IutA @ TonB-dependent siderophore receptor;Phosphoethanolamine transferase EptC [E.coli], specific for LPS heptose I residue;Diguanylate cyclase (EC 2.7.7.65) => DgcJ;Putative outer membrane lipoprotein;TorA-specific chaperone protein, TorD;Oligogalacturonide-Rhamnogalactur…	c2103;c2581;c3623;c4914;SL1344_1218;SL1344_1867;SL1344_3787;STM474_0388;STM474_0573;STM474_0892;Z2702;Z3632;Z5750;K01908;K04017;K05709;K05711;K07821;K18898;K18899;K08087;K19096;K19564;DUF1482;DUF2542;DUF2545;DUF4051;SF3931;STM2304;STM474_0647;K03329;K03755;K05708;K05887;K07772;K08277;K08354;K00316;CaiF_GrlA;DUF1870;DUF2623;K05245;YebF;SL1344_4000;K11811;Tweety;K01659;K07811;K08326;K18531;Colicin_…
CL-80	36	3	Yes	No	msp_0963c;msp_0844c;msp_0936c	Campylobacter hominis;Campylobacter concisus 2;Helicobacter winghamensis	M00156:Cytochrome c oxidase, cbb3-type	ATP synthesis	K16293;K07100;K00407;K05922;K05927;K08973;K09804;K09943;K09944;K17251;K00404;K00413;K00406;K07152;K08077;K01505;K07501;K00405	ATPase-cat_bd;DUF1104;DUF2018;DUF2603;DUF4006;DUF4149;DUF455;DUF507;FixO;FixQ;HobA;NADH-UOR_E;PGBA_N;Secretin_N_2;UPF0093;FixP_N;FixH	-	-	-	-	Spiral-shaped	-	K16293;K07100;K00407;K05922;K05927;K08973;K09804;K09943;K09944;K17251;ATPase-cat_bd;DUF1104;DUF2018;DUF2603;DUF4006;DUF4149;DUF455;DUF507;FixO;FixQ;HobA;NADH-UOR_E;PGBA_N;Secretin_N_2;UPF0093;Spiral-shaped;K00404;K00413;FixP_N;K00406;K07152;FixH;K08077;K01505;K07501;K00405
CL-298	17	3	Yes	No	msp_0695;msp_0718;msp_0895	unclassified Rhodospirillales;unclassified Rhodospirillales;Acetobacter sp. CAG:977	M00520:ChvG-ChvI (acidity sensing) two-component regulatory system	Two-component regulatory system	K09826;K09991;K13687;K14981;K16653;K07157;K01663	DIT1_PvcA;DUF1849;DUF2889;FYDLN_acid;Mitofilin;Sensor_TM1;Stimulus_sens_1;AtpR;DUF2478	BH00620	-	-	-	-	DNA-binding response regulator ChvI	K09826;K09991;K13687;K14981;K16653;DIT1_PvcA;DUF1849;DUF2889;FYDLN_acid;Mitofilin;Sensor_TM1;Stimulus_sens_1;K07157;AtpR;BH00620;K01663;DUF2478
CL-351	11	3	Yes	No	msp_0881;msp_1476;msp_0715c	Haemophilus parainfluenzae;Haemophilus pittmaniae;Aggregatibacter segnis	-	-	K07268;K01161	DUF2489;SpecificRecomb;DUF2572;DUF5358;DUF5363;DUF5374;DUF5377;DUF1523;DUF2547	-	-	-	-	-	-	K07268;DUF2489;SpecificRecomb;DUF2572;DUF5358;DUF5363;DUF5374;DUF5377;K01161;DUF1523;DUF2547
CL-278	10	3	Yes	No	msp_0140;msp_0341;msp_0633	Klebsiella oxytoca;Klebsiella michiganensis 2;Klebsiella michiganensis 1	M00835:Pyocyanine biosynthesis, chorismate => pyocyanine ;M00235:Arginine/ornithine transport system	Biosynthesis of secondary metabolites;Phosphate and amino acid transport system	K07395;K11917;K12255;K20938;K10024;K13063;K18622	MFS_MOT1	VBIShiFle211407_3690	cazy.GH13_13	-	-	-	-	K07395;K11917;K12255;K20938;K10024;K13063;VBIShiFle211407_3690;cazy.GH13_13;K18622;MFS_MOT1
CL-94	5	3	Yes	No	msp_0252;msp_0053;msp_0393	unclassified Ruminiclostridium;[Eubacterium] siraeum;unclassified Ruminococcaceae	-	-	-	DUF5023;DUF5021;MitoNEET_N;Peptidase_M8;SF3A2	-	-	-	-	-	-	DUF5023;DUF5021;MitoNEET_N;Peptidase_M8;SF3A2
CL-234	5	3	Yes	No	msp_1816;msp_0140;msp_0157	Citrobacter braakii;Klebsiella oxytoca;Klebsiella aerogenes	-	-	K01801	CblD;Fimbrial_CS1;DUF2913;Usher_TcfC	-	-	-	-	-	-	CblD;K01801;Fimbrial_CS1;DUF2913;Usher_TcfC
CL-72	3	3	Yes	No	msp_1057c;msp_1168;msp_1648	Peptoniphilus lacrimalis;Peptoniphilus harei;Peptoniphilus senegalensis	-	-	K03821	DUF3141;PHA_synth_III_E	-	-	-	-	-	-	DUF3141;PHA_synth_III_E;K03821
CL-261	3	3	Yes	No	msp_0110;msp_0226;msp_0295	Bilophila wadsworthia;Desulfovibrionaceae bacterium CIM:MAG 900;Desulfovibrio fairfieldensis	M00571:AlgE-type Mannuronan C-5-Epimerase transport system	Bacterial secretion system	K16299	TrbH;DUF5338	-	-	-	-	-	-	TrbH;K16299;DUF5338
CL-414	3	3	Yes	No	msp_0403;msp_0497;msp_0853c	Enterococcus faecium;Enterococcus faecalis;Granulicatella adiacens	-	-	-	DUF1507	lmo0931;lmo1956	-	-	-	-	Lipoate-protein ligase A;Ferric uptake regulation protein FUR	DUF1507;lmo0931;lmo1956
CL-638	3	3	Yes	No	msp_0024;msp_0360;msp_1743	Hungatella effluvii;[Clostridium] asparagiforme == lavalense;unclassified Christensenellaceae-Catabacteriaceae	-	-	K17238;K17239;K17237	-	-	-	-	-	-	-	K17238;K17239;K17237
CL-37	189	2	Yes	No	msp_0585;msp_0924	Methanobrevibacter smithii 1;Methanobrevibacter smithii 2	M00567:Methanogenesis, CO2 => methane ;M00357:Methanogenesis, acetate => methane ;M00608:2-Oxocarboxylic acid chain extension, 2-oxoglutarate => 2-oxoadipate => 2-oxopimelate => 2-oxosuberate ;M00378:F420 biosynthesis ;M00433:Lysine biosynthesis, 2-oxoglutarate => 2-oxoadipate ;M00184:RNA polymerase, archaea	Methane metabolism;Lysine metabolism;RNA polymerase	K08097;K07744;K16792;K00200;K00201;K00202;K00203;K00204;K00319;K00440;K00442;K00443;K00577;K00578;K00579;K00580;K00581;K00582;K00583;K00584;K00672;K02875;K02915;K03044;K03045;K03136;K03537;K03539;K03622;K03725;K05715;K05716;K06862;K06914;K06931;K06984;K07072;K07134;K07135;K07144;K07332;K07333;K07388;K07585;K07730;K08096;K08979;K09142;K09154;K09713;K09717;K09720;K09724;K09727;K09733;K10978;K11260;…	Rad9;RNA_pol_Rpb4;Ribosomal_L34e;4HFCP_synth;Alba;CDC24_OB3;CENP-S;ComA;DUF1611_N;DUF1724;DUF1802;DUF1890;DUF1894;DUF1922;DUF1947;DUF1959;DUF2070;DUF2096;DUF2097;DUF2104;DUF2105;DUF2106;DUF2107;DUF2109;DUF2114;DUF2117;DUF2120;DUF2121;DUF2193;DUF2299;DUF3236;DUF3344;DUF4346;DUF515;DUF530;DUF749;DUF98;Exo5;Fae;Fibrillarin_2;FTR;FTR_C;HMD;Methyltrn_RNA_3;MTD;MtrA;MtrB;MtrC;MtrD;MtrE;MtrF;MtrG;NiFe_h…	-	-	-	-	-	-	Rad9;RNA_pol_Rpb4;Ribosomal_L34e;K08097;K07744;K16792;K00200;K00201;K00202;K00203;K00204;K00319;K00440;K00442;K00443;K00577;K00578;K00579;K00580;K00581;K00582;K00583;K00584;K00672;K02875;K02915;K03044;K03045;K03136;K03537;K03539;K03622;K03725;K05715;K05716;K06862;K06914;K06931;K06984;K07072;K07134;K07135;K07144;K07332;K07333;K07388;K07585;K07730;K08096;K08979;K09142;K09154;K09713;K09717;K09720;K0…
CL-252	73	2	Yes	No	msp_0030;msp_0174	Klebsiella pneumoniae;Klebsiella quasipneumoniae	M00537:Xylene degradation, xylene => methylbenzoate ;M00551:Benzoate degradation, benzoate => catechol / methylbenzoate => methylcatechol ;M00568:Catechol ortho-cleavage, catechol => 3-oxoadipate ;M00302:2-Aminoethylphosphonate transport system ;M00331:Type II general secretion system	Aromatics degradation;Mineral and organic ion transport system;Bacterial secretion system	K02463;K00141;K05549;K07401;K13874;K16234;K21265;K07358;K00129;K15930;K20034;K00448;K00449;K00481;K01031;K02465;K05550;K11081;K14333;K08319;K03464;K09984;K13609;K18699;K20325;K01032;K11082;K11084;K11083;K18305;K18923;K08178;K03381;K05783;K00477;K05784;K07222;K16047	2OG-FeII_Oxy;DIOX_N;Rdx;Chrome_Resist;PsiB;TraP;Cellsynth_D;DUF2236;DUF1398;DUF2770;MoaF_C;CBP_BcsO;Glyoxalase_5;PCDO_beta_N;DUF1028;DUF1272;MIase;MoaF;DUF4089;DUF2474;Plasmid_stab_B;T2SSB;T2SSN;7TMR-DISMED2;Dioxygenase_N;DUF2164;PhyH	SDY_1022;SL1344_0016;c5392;SL1344_3102;SL1344_1169;PSLT072;SL1344_0513	cazy.GH5_41	-	-	-	Type 1 fimbriae regulatory protein FimE;X polypeptide;Outer Membrane Siderophore Receptor IroN;Lysozyme (N-acetylmuramidase) family, (EC 3.2.1.17);Probable metabolite transport protein;Putative oxidoreductase	K02463;2OG-FeII_Oxy;DIOX_N;SDY_1022;K00141;K05549;K07401;K13874;Rdx;SL1344_0016;Chrome_Resist;PsiB;TraP;c5392;K16234;K21265;Cellsynth_D;DUF2236;K07358;K00129;K15930;K20034;DUF1398;DUF2770;MoaF_C;K00448;K00449;K00481;K01031;K02465;K05550;K11081;K14333;CBP_BcsO;Glyoxalase_5;PCDO_beta_N;SL1344_3102;K08319;K03464;K09984;K13609;K18699;K20325;DUF1028;DUF1272;MIase;MoaF;cazy.GH5_41;K01032;K11082;K11084;…
CL-254	24	2	Yes	No	msp_0174;msp_0241	Klebsiella quasipneumoniae;Klebsiella variicola	M00780:Tetracycline/oxytetracycline biosynthesis, pretetramide => tetracycline/oxytetracycline ;M00823:Chlortetracycline biosynthesis, pretetramide => chlortetracycline ;M00231:Octopine/nopaline transport system	Biosynthesis of secondary metabolites;Phosphate and amino acid transport system	K10590;K02595;K02596;K02597;K10019;K10020;K10021;K12658;K13877;K21061;K21062;K10018;K02593;K14252;K21272;K00461	AfsA;NifW;NifZ;DUF3364;CbtB;NifT;DUF5066	SL1344_3867	-	-	-	-	Uncharacterized protein STM3907	K10590;K02595;K02596;K02597;K10019;K10020;K10021;AfsA;NifW;NifZ;K12658;K13877;K21061;K21062;DUF3364;SL1344_3867;K10018;K02593;CbtB;NifT;K14252;K21272;DUF5066;K00461
CL-48	16	2	Yes	No	msp_0195;msp_0369	Desulfovibrio piger;uncultured Desulfovibrio sp. RUG514	-	-	K12214;K12218;K12202;K12204;K12206;K12209;K12213;K12203;K15368;K20141;K19136	T4BSS_DotI_IcmL;T4SS_TraI;DotD;DUF1045;T4BSS_DotH_IcmK	-	-	-	-	-	-	K12214;K12218;T4BSS_DotI_IcmL;K12202;K12204;T4SS_TraI;K12206;K12209;DotD;K12213;K12203;DUF1045;T4BSS_DotH_IcmK;K15368;K20141;K19136
CL-276	15	2	Yes	No	msp_1936;msp_1935	unclassified;unclassified	-	-	K19465	Gp5_OB;Trans_coact;gp45-slide_C;Phage_clamp_A;Phage_gp53;T4_Gp59_N;T4_neck-protein;Translat_reg;UvsY;T4-gp15_tss;RNaseH_C;T4_baseplate;DNA_Packaging;gp32	-	-	-	-	-	-	Gp5_OB;Trans_coact;gp45-slide_C;Phage_clamp_A;Phage_gp53;T4_Gp59_N;T4_neck-protein;Translat_reg;UvsY;T4-gp15_tss;RNaseH_C;T4_baseplate;DNA_Packaging;gp32;K19465
CL-404	6	2	Yes	No	msp_0241;msp_0633	Klebsiella variicola;Klebsiella michiganensis 1	-	-	K15790;K20807;K01721	NHase_alpha;NHase_beta;NifQ	-	-	-	-	-	-	K15790;K20807;NHase_alpha;NHase_beta;NifQ;K01721
CL-133	5	2	Yes	No	msp_0017;msp_0752	Roseburia intestinalis;Ruminococcus sp. CAG:624 & UBA6407 & UBA4697	-	-	K00646;K15311;K15312;K15329;K15337	-	-	-	-	-	-	-	K00646;K15311;K15312;K15329;K15337
CL-136	5	2	Yes	No	msp_0082c;msp_0100	Providencia rettgeri 2;Morganella morganii	-	-	K09012	DUF411;ParD_like;DUF817;Phage_lambda_P	-	-	-	-	-	-	DUF411;ParD_like;K09012;DUF817;Phage_lambda_P
CL-255	5	2	Yes	No	msp_0465;msp_0532	unclassified Opitutae;unclassified Opitutae	M00509:WspE-WspRF (chemosensory) two-component regulatory system	Two-component regulatory system	K20203;K13491;K13486	MauE;SBP56	-	-	-	-	-	-	K20203;K13491;MauE;SBP56;K13486
CL-92	4	2	Yes	No	msp_1280;msp_1853	Elusimicrobia bacterium UBA1436;unclassified Elusimicrobia	M00824:9-membered enediyne core biosynthesis, malonyl-CoA => 3-hydroxyhexadeca-4,6,8,10,12,14-hexaenoyl-ACP => 9-membered enediyne core	Biosynthesis of secondary metabolites	K20225;K15314;K20867;K08852	-	-	-	-	-	-	-	K20225;K15314;K20867;K08852
CL-225	4	2	Yes	No	msp_0295;msp_0195	Desulfovibrio fairfieldensis;Desulfovibrio piger	M00571:AlgE-type Mannuronan C-5-Epimerase transport system	Bacterial secretion system	K01021;K16300;K17878	SapC	-	-	-	-	-	-	K01021;K16300;SapC;K17878
CL-434	4	2	Yes	No	msp_0396;msp_0573	Adlercreutzia equolifaciens;Eggerthella lenta	M00220:Rhamnose transport system	Saccharide, polyol, and lipid transport system	K10534;K17225;K05301;K16051	-	-	-	-	-	-	-	K10534;K17225;K05301;K16051
CL-686	4	2	Yes	No	msp_0983;msp_0832	Streptococcus lutetiensis;Streptococcus pasteurianus	-	-	K11705;K11706;K11704	-	-	-	-	-	Ovoid-shaped	-	K11705;K11706;Ovoid-shaped;K11704
CL-86	3	2	Yes	No	msp_0011;msp_0019	Bacteroides thetaiotaomicron;Bacteroides faecis	-	-	K08104	DUF4969;DUF5030	-	-	-	-	-	-	K08104;DUF4969;DUF5030
CL-239	3	2	Yes	No	msp_0209;msp_1818	Enterobacter roggenkampii;unclassified Saccharopolyspora	-	-	K06876	DPRP;Cu_amine_oxidN3	-	-	-	-	-	-	DPRP;Cu_amine_oxidN3;K06876
CL-317	3	2	Yes	No	msp_0128;msp_0191	Butyricimonas virosa;unclassified Butyricimonas	-	-	K13443;K17531;K12977	-	-	-	-	-	-	-	K13443;K17531;K12977
CL-331	3	2	Yes	No	msp_0570;msp_0627	Bifidobacterium dentium;Bifidobacterium breve	-	-	K09164	DUF1684;GDE_N_bis	-	-	-	-	-	-	DUF1684;GDE_N_bis;K09164
CL-346	3	2	Yes	No	msp_1019;msp_1631	Oxalobacter formigenes 1;Oxalobacter formigenes 2	-	-	K18916;K00469	Pesticin	-	-	-	-	-	-	K18916;Pesticin;K00469
CL-347	3	2	Yes	No	msp_0073;msp_0159	Victivallales bacterium CCUG 44730;Victivallis vadensis	-	-	K08254;K09504	DUF1570	-	-	-	-	-	-	K08254;K09504;DUF1570
CL-350	3	2	Yes	No	msp_1280;msp_1853	Elusimicrobia bacterium UBA1436;unclassified Elusimicrobia	-	-	K16128	DUF1646;Pilin_GH	-	-	-	-	-	-	DUF1646;K16128;Pilin_GH
CL-395	3	2	Yes	No	msp_0140;msp_1205	Klebsiella oxytoca;Comamonas kerstersii	-	-	K04099	LigA;DUF1513	-	-	-	-	-	-	K04099;LigA;DUF1513
CL-600	3	2	Yes	No	msp_0380;msp_0742	Streptococcus salivarius;Streptococcus parasanguinis	-	-	K15260	Haemocyan_bet_s;Nsp3_PL2pro	-	-	-	-	-	-	Haemocyan_bet_s;Nsp3_PL2pro;K15260
CL-649	3	2	Yes	No	msp_0671;msp_1308	Turicibacter sanguinis 1;Turicibacter sanguinis 2	M00281:PTS system, lactose-specific II component	Phosphotransferase system (PTS)	K16188	DUF2600;YvbH_ext	-	-	-	-	-	-	DUF2600;YvbH_ext;K16188
CL-665	3	2	Yes	No	msp_0226;msp_0295	Desulfovibrionaceae bacterium CIM:MAG 900;Desulfovibrio fairfieldensis	-	-	-	DUF3179;Peptidase_M99_C;PilM	-	-	-	-	-	-	DUF3179;Peptidase_M99_C;PilM
CL-668	3	2	Yes	No	msp_0360;msp_1048	[Clostridium] asparagiforme == lavalense;unclassified Lachnoclostridium	M00116:Menaquinone biosynthesis, chorismate => menaquinol	Cofactor and vitamin biosynthesis	K17312;K17313;K17311	-	-	-	-	-	-	-	K17312;K17313;K17311
CL-671	3	2	Yes	No	msp_0749;msp_1092	unclassified Sutterella;unclassified Sutterellaceae	-	-	K20552	HTH_43;RNA12	-	-	-	-	-	-	HTH_43;RNA12;K20552
CL-64	420	1	Yes	No	msp_1818	unclassified Saccharopolyspora	M00538:Toluene degradation, toluene => benzoate ;M00811:Nicotine degradation, pyrrolidine pathway, nicotine => succinate semialdehyde ;M00833:Calicheamicin biosynthesis, calicheamicinone => calicheamicin ;M00161:Photosystem II ;M00163:Photosystem I ;M00145:NAD(P)H:quinone oxidoreductase, chloroplasts and cyanobacteria ;M00162:Cytochrome b6f complex ;M00151:Cytochrome bc1 complex respiratory unit …	Aromatics degradation;Biosynthesis of secondary metabolites;Photosynthesis;ATP synthesis;Metallic cation, iron-siderophore and vitamin B12 transport system;Phosphotransferase system (PTS)	K01724;K10357;K14997;K21444;K10592;K14401;K13356;K16260;K11446;K15929;K14481;K16237;K00148;K14956;K17228;K18221;K21607;K02802;K02803;K07682;K08329;K12503;K13419;K13671;K14162;K15510;K14253;K05577;K20754;K10187;K20170;K00365;K15890;K05573;K00493;K02259;K07734;K09709;K13457;K02132;K08261;K14728;K10674;K00035;K00232;K00304;K00453;K00456;K00479;K00596;K01416;K01616;K01707;K01723;K01820;K02128;K02239;…	ALO;Pterin_4a;ABATE;ACOX;AcylCoA_DH_N;Ad_Cy_reg;AftA_C;AftA_N;Apocytochr_F_N;Arabino_trans_C;Arabinose_trans;AurF;Caa3_CtaG;COX15-CtaA;COX2_TM;Cytochrom_C550;DBD_Tnp_Mut;DoxX_2;DUF1059;DUF1264;DUF1360;DUF1775;DUF1990;DUF2165;DUF2237;DUF2309;DUF2382;DUF2505;DUF2537;DUF2567;DUF2771;DUF3017;DUF3090;DUF3093;DUF3097;DUF3099;DUF3105;DUF3145;DUF3153;DUF3291;DUF3376;DUF3499;DUF3558;DUF3817;DUF397;DUF4216…	BCG_2067c;ERDMAN_1031;ERDMAN_2956;ERDMAN_2965;lmo0838;MAP3324c;MAV_2450;MT2282;Mtub2_010100008163;Rv0101;Rv0166;Rv0326;Rv0414c;Rv0636;Rv0670;Rv0821c;Rv0867c;Rv0930;Rv1002c;Rv1221;Rv1284;Rv1422;Rv1465;Rv1469;Rv1539;Rv1661;Rv1817;Rv1884c;Rv2192c;Rv2359;Rv2388c;Rv2391;Rv2392;Rv2450c;Rv2692;Rv2707;Rv2711;Rv2946c;Rv2947c;Rv2986c;Rv3083;Rv3133c;Rv3151;Rv3223c;Rv3236c;Rv3277;Rv3400;Rv3409c;Rv3414c;Rv348…	cazy.GH5_51;cazy.GH62;cazy.GT48;cazy.GT53;cazy.GT85;cazy.GT87;cazy.GH5_43	-	-	-	Modular polyketide synthase;Phosphate ABC transporter, permease protein PstA (TC 3.A.1.7.1);Uncharacterized DUF3159 protein Rv2693c;Polyphosphate glucokinase (EC 2.7.1.63);Sugar phosphate transporter;3-isopropylmalate dehydratase small subunit (EC 4.2.1.33);RNA polymerase sigma factor RpoE;Putative regulatory protein;Enhanced intracellular survival protein;Nonribosomal peptide synthetase in FadD1…	K01724;ALO;Pterin_4a;cazy.GH5_51;cazy.GH62;cazy.GT48;cazy.GT53;cazy.GT85;cazy.GT87;BCG_2067c;ERDMAN_1031;ERDMAN_2956;ERDMAN_2965;lmo0838;MAP3324c;MAV_2450;MT2282;Mtub2_010100008163;Rv0101;Rv0166;Rv0326;Rv0414c;Rv0636;Rv0670;Rv0821c;Rv0867c;Rv0930;Rv1002c;Rv1221;Rv1284;Rv1422;Rv1465;Rv1469;Rv1539;Rv1661;Rv1817;Rv1884c;Rv2192c;Rv2359;Rv2388c;Rv2391;Rv2392;Rv2450c;Rv2692;Rv2707;Rv2711;Rv2946c;Rv2947…
CL-51	276	1	Yes	No	msp_0005	Escherichia coli	M00546:Purine degradation, xanthine => urea ;M00543:Biphenyl degradation, biphenyl => 2-oxopent-4-enoate + benzoate ;M00856:Salmonella enterica pathogenicity signature, typhoid toxin	Purine metabolism;Aromatics degradation;Pathogenicity	K01355;K02550;K03459;K03836;K07353;K07354;K07355;K07471;K07591;K09934;K09980;K11008;K11139;K11739;K12687;K16140;K16325;K18840;K18921;K19161;K20267;K21324;K13246;K15373;K16709;K00785;K00862;K08689;K13739;K15750;K16303;K21054;K06884;K07314;K07356;K07786;K10762;K11014;K11472;K12055;K12522;K13381;K14065;K15019;K18015;K18320;K18838;K18919;K19155;K19160;K20269;K07352;K11177;K07804;K04781;K18862;K00508;…	Activator-TraM;CNF1;ComGG;DicB;DUF1281;DUF1327;DUF1380;DUF1382;DUF1391;DUF1472;DUF2138;DUF2170;DUF2300;DUF2491;DUF2528;DUF2575;DUF2686;DUF2713;DUF2732;DUF2859;DUF3927;DUF3950;DUF4754;DUF4755;DUF4756;DUF4765;DUF5405;DUF5431;DUF5445;DUF5507;DUF5508;DUF957;DUF987;Exc;Gam;HlyE;Ibs_toxin;Imm35;Imm57;KleE;Leu_leader;MGTL;Microcin;NfrA_C;Ntox25;Ntox34;Packaging_FI;PapG_C;PapJ;Phage_attach;Phage_TTP_12;P…	APECO1_3527;APECO1_O1CoBM96;BWG_0837;BWG_0839;c0468;c3566;c3568;c3586;c3592;c3690;c4448;c4450;C4893_43000;CP0271;EC042_pAA031;EC042_pAA046;SL1344_1034;SL1344_1325;SL1344_2126;SL1344_2765;SL1344_3655;SL1344_3908;STM474_3892;STM474_4130;UTI89_C4921;Z0390;Z1126;Z2056;Z2144;Z2176;Z2195;Z2203;Z2205;Z2749;Z3948;Z3950;Z4200;Z4887;Z5608;Z5665;Z5905;SL1344_0909;STM474_3887;Z3022;BWG_0838;c0393;EC042_4593;…	cazy.GH104;cazy.GT52	-	-	-	hypothetical protein;AidA-I adhesin-like protein;Uncharacterized protein GfcC;Uncharacterized lipoprotein YmcC precursor;Threonine-rich inner membrane protein GfcA;Per-activated serine protease autotransporter enterotoxin EspC;Putative transferase;Thiosulfate reductase cytochrome B subunit (membrane anchoring protein);Capsular polysaccharide export system protein KpsC;O-antigen ligase;UDP-galacto…	APECO1_3527;APECO1_O1CoBM96;BWG_0837;BWG_0839;c0468;c3566;c3568;c3586;c3592;c3690;c4448;c4450;C4893_43000;CP0271;EC042_pAA031;EC042_pAA046;SL1344_1034;SL1344_1325;SL1344_2126;SL1344_2765;SL1344_3655;SL1344_3908;STM474_3892;STM474_4130;UTI89_C4921;Z0390;Z1126;Z2056;Z2144;Z2176;Z2195;Z2203;Z2205;Z2749;Z3948;Z3950;Z4200;Z4887;Z5608;Z5665;Z5905;K01355;K02550;K03459;K03836;K07353;K07354;K07355;K07471;…
CL-1	144	1	Yes	No	msp_0368c	Aeromonas veronii	M00235:Arginine/ornithine transport system	Phosphate and amino acid transport system	K01346;K06604;K10123;K20274;K07086;K14683;K21606;K00451;K00500;K00569;K02672;K04052;K04060;K04125;K07020;K07167;K08983;K09926;K09950;K09983;K10023;K10025;K10912;K10913;K10925;K10926;K11418;K12254;K12279;K12280;K12281;K12284;K12286;K15349;K15852;K16636;K18145;K19213;K20801;K21429;K02665;K10022;K16872;K19511;K00635;K18555;K19809;K21217;K21218;K00103;K18589;K18795;K00822;K02670;K00507;K01907;K12276;…	Cystatin;DUF2861;DUF3346;DUF3404;DUF3581;DUF3630;DUF429;Lipoprotein_15;17kDa_Anti_2;2OG-FeII_Oxy_4;APT;Biopterin_H;CHASE5;CpeT;DHC;DM13;DNAJ_related;DUF1499;DUF1704;DUF1820;DUF1993;DUF2061;DUF2063;DUF2214;DUF2282;DUF2374;DUF2389;DUF2390;DUF2753;DUF2788;DUF2789;DUF2835;DUF2845;DUF2987;DUF3103;DUF3135;DUF3149;DUF3157;DUF3280;DUF3297;DUF3299;DUF3301;DUF3530;DUF3545;DUF3549;DUF3634;DUF3802;DUF4426;DU…	VBIEscCol129985_0005	cazy.GH13_27	-	-	-	-	K01346;K06604;K10123;Cystatin;DUF2861;DUF3346;DUF3404;DUF3581;DUF3630;DUF429;Lipoprotein_15;VBIEscCol129985_0005;K20274;K07086;K14683;K21606;K00451;K00500;K00569;K02672;K04052;K04060;K04125;K07020;K07167;K08983;K09926;K09950;K09983;K10023;K10025;K10912;K10913;K10925;K10926;K11418;K12254;K12279;K12280;K12281;K12284;K12286;K15349;K15852;K16636;K18145;K19213;K20801;K21429;17kDa_Anti_2;2OG-FeII_Oxy_4…
CL-70	55	1	Yes	No	msp_0228	Proteus mirabilis	M00417:Cytochrome o ubiquinol oxidase ;M00326:RTX toxin transport system	ATP synthesis;Bacterial secretion system	K12521;K12523;K02300;K12517;K14744;K19056;K08359;K16078;K08688;K15067;K13285;K13287;K07394;K12531;K05793;K11894;K06078;K15522	Anthrax_toxA;Peptidase_M10_C;Phage_TTP_13;YdaT_toxin;OrgA_MxiK;Phage_antitermQ;Phage_ASH;Antiterm;COX4_pro;DUF3024;Phage_lysis;DUF2523;MLD;Phage_TAC_14;PyocinActivator;RtxA;DUF2591;ExsD;Caudo_TAP;DUF2787;DUF4150;Peptidase_C80;Phage_holin_3_1;PrgH;T3SS_TC;DUF4128;TbpB_B_D;P22_Tail-4	SL1344_2869;STM2894;STM14_1742;CP0129;LF82_0521;c2518;SDY_3554;c3589;SL1344_2868	-	-	-	-	Ferric siderophore receptor, TonB dependent;Periplasmic fimbrial chaperone;Chaperone protein SicA (Salmonella invasin chaperone);Periplasmic thiol:disulfide interchange protein DsbA;TonB-dependent hemin, ferrichrome receptor;Type III secretion inner membrane protein (YscS,homologous to flagellar export components); Surface presentation of antigens protein SpaQ;Type III secretion inner membrane pr…	K12521;Anthrax_toxA;Peptidase_M10_C;Phage_TTP_13;YdaT_toxin;SL1344_2869;STM2894;K12523;OrgA_MxiK;Phage_antitermQ;Phage_ASH;K02300;K12517;K14744;K19056;K08359;Antiterm;COX4_pro;DUF3024;Phage_lysis;K16078;K08688;K15067;DUF2523;MLD;Phage_TAC_14;PyocinActivator;RtxA;STM14_1742;K13285;DUF2591;ExsD;CP0129;LF82_0521;K13287;K07394;K12531;Caudo_TAP;DUF2787;DUF4150;Peptidase_C80;Phage_holin_3_1;PrgH;T3SS_T…
CL-407	53	1	Yes	No	msp_0082c	Providencia rettgeri 2	M00622:Nicotinate degradation, nicotinate => fumarate ;M00787:Bacilysin biosynthesis, prephenate => bacilysin ;M00326:RTX toxin transport system ;M00644:Multidrug resistance, efflux pump MexHI-OprD;M00850:Vibrio cholerae pathogenicity signature, cholera toxins	Cofactor and vitamin biosynthesis;Biosynthesis of secondary metabolites;Bacterial secretion system;Drug efflux transporter/pump;Pathogenicity	K19735;K10953;K12530;K18307;K05602;K13286;K13485;K13740;K13791;K13792;K16517;K18029;K18030;K19550;K19615;K20049;K21060;K11909;K01502	DUF2384;TraA;Cloacin_immun;DUF1240;Invas_SpaK;CIF;Colicin_im;DUF1543;DUF1937;DUF4334;DUF4762;GXWXG;IpaC_SipC;Ldl_recept_b;NEL;ParG;Phage_NinH;Phage_TAC_9;SipA;SPAM;SPAN;TcdA_TcdB_pore;VasI;DUF3156	SEN2726;SL1344_2865;SL1344_2867;SL1344_2876;SL1344_2878;STM14_3471;STM2898;STMUK_2884;Z2053;E2348C_2915	-	-	-	-	Per-activated serine protease autotransporter enterotoxin EspC / autotransporter domain, T5aSS type secretion;Cell invasion protein SipB;Chaperone protein SicA (Salmonella invasin chaperone);Surface presentation of antigens protein SpaR; Type III secretion inner membrane protein (YscT,HrcT,SpaR,EscT,EpaR1,homologous to flagellar export components);Type III secretion outermembrane contact sensing …	K19735;DUF2384;TraA;K10953;K12530;K18307;Cloacin_immun;DUF1240;Invas_SpaK;SEN2726;SL1344_2865;SL1344_2867;SL1344_2876;SL1344_2878;STM14_3471;STM2898;STMUK_2884;Z2053;K05602;K13286;K13485;K13740;K13791;K13792;K16517;K18029;K18030;K19550;K19615;K20049;K21060;CIF;Colicin_im;DUF1543;DUF1937;DUF4334;DUF4762;GXWXG;IpaC_SipC;Ldl_recept_b;NEL;ParG;Phage_NinH;Phage_TAC_9;SipA;SPAM;SPAN;TcdA_TcdB_pore;K119…
CL-257	46	1	Yes	No	msp_1205	Comamonas kerstersii	M00534:Naphthalene degradation, naphthalene => salicylate ;M00581:Biotin transport system	Aromatics degradation;Metallic cation, iron-siderophore and vitamin B12 transport system	K01555;K02366;K04090;K04118;K05559;K05561;K05973;K09788;K09941;K09947;K14584;K14998;K18289;K20455;K19597;K16783;K05797;K07338;K20035;K10220;K19746;K02659;K09959;K10764	DUF1134;DUF1415;DUF1841;DUF2083;DUF2242;DUF3025;DUF3731;DUF4148;DUF4260;FAA_hydrolase_N;PilX;SURF1;Urate_ox_N;PhaC_N;YrhK;DUF3014;Cytochrom_C_2;DUF3422;DUF779;PHB_depo_C;GshA	Rv1357c	-	-	-	-	Sensory box/GGDEF family protein	K01555;K02366;K04090;K04118;K05559;K05561;K05973;K09788;K09941;K09947;K14584;K14998;K18289;K20455;DUF1134;DUF1415;DUF1841;DUF2083;DUF2242;DUF3025;DUF3731;DUF4148;DUF4260;FAA_hydrolase_N;PilX;SURF1;Urate_ox_N;Rv1357c;PhaC_N;K19597;YrhK;K16783;K05797;DUF3014;K07338;K20035;K10220;K19746;K02659;K09959;K10764;Cytochrom_C_2;DUF3422;DUF779;PHB_depo_C;GshA
CL-367	26	1	Yes	No	msp_0030	Klebsiella pneumoniae	M00266:PTS system, maltose and glucose-specific II component ;M00333:Type IV secretion system	Phosphotransferase system (PTS);Bacterial secretion system	K02790;K03197;K06892;K07233;K07823;K19148	DUF2145;CopB;DUF1173;DUF2857;DUF2933;DUF2976;DUF3158;DUF3258;DUF3487;DUF3577;DUF4060;Multi_ubiq;Phage_TTP_11;Plasmid_RAQPRD;Prok-E2_E;RepB-RCR_reg;TraI_2_C	SB96558_5304;STM474_1888;APECO1_O1CoBM172	-	-	-	-	N(2)-citryl-N(6)-acetyl-N(6)-hydroxylysine synthase (EC 6.3.2.38), aerobactin biosynthesis protein IucA;N6-hydroxylysine O-acetyltransferase (EC 2.3.1.102), aerobactin biosynthesis protein IucB @ Siderophore synthetase small component, acetyltransferase;Permease of the drug/metabolite transporter (DMT) superfamily	DUF2145;SB96558_5304;STM474_1888;K02790;K03197;K06892;K07233;K07823;K19148;CopB;DUF1173;DUF2857;DUF2933;DUF2976;DUF3158;DUF3258;DUF3487;DUF3577;DUF4060;Multi_ubiq;Phage_TTP_11;Plasmid_RAQPRD;Prok-E2_E;RepB-RCR_reg;TraI_2_C;APECO1_O1CoBM172
CL-264	20	1	Yes	No	msp_0486	Lactococcus lactis subsp. lactis	M00854:Glycogen biosynthesis, glucose-1P => glycogen/starch	Other carbohydrate metabolism	K19272;K20812;K00079;K03731	DUF1140;DUF1642;DUF1031;DUF1125;DUF1359;DUF1660;DUF2177;DUF4395;DUF658;Lac_bphage_repr;Lipoprotein_22;Rep_Org_C;ZoocinA_TRD;L_lac_phage_MSP;tRNA-synt_2_TM;DUF1056	-	-	-	-	-	-	DUF1140;DUF1642;K19272;K20812;DUF1031;DUF1125;DUF1359;DUF1660;DUF2177;DUF4395;DUF658;Lac_bphage_repr;Lipoprotein_22;Rep_Org_C;ZoocinA_TRD;L_lac_phage_MSP;tRNA-synt_2_TM;K00079;K03731;DUF1056
CL-123	19	1	Yes	No	msp_0403	Enterococcus faecium	M00269:PTS system, sucrose-specific II component	Phosphotransferase system (PTS)	K10133;K20381;K02808;K18149	DUF3188;IDEAL;Peptidase_C47;DUF2512;DUF3206;DUF334;DUF4429;DUF443;DUF5415;Epsilon_antitox;MATH;Staphopain_pro;DUF4809;Hol_Tox	lmo1821	-	-	-	-	Protein serine/threonine phosphatase PrpC, regulation of stationary phase	K10133;K20381;DUF3188;IDEAL;Peptidase_C47;K02808;DUF2512;DUF3206;DUF334;DUF4429;DUF443;DUF5415;Epsilon_antitox;MATH;lmo1821;Staphopain_pro;K18149;DUF4809;Hol_Tox
CL-330	19	1	Yes	No	msp_0100	Morganella morganii	M00151:Cytochrome bc1 complex respiratory unit ;M00591:Putative xylitol transport system	ATP synthesis;Saccharide, polyol, and lipid transport system	K00410;K13450;K15366;K16637;K17205;K17207;K19100	Cloacin;Cytotoxic;DUF3088;Inh;Phage-scaffold;Repressor_Mnt;TcdB_toxin_midC;VRP1;VRP3	pKDSC50_p04;SL1344_0543	cazy.GH90	-	-	-	Transcriptional regulator of fimbriae expression FimY	pKDSC50_p04;K00410;K13450;K15366;K16637;K17205;K17207;K19100;Cloacin;Cytotoxic;DUF3088;Inh;Phage-scaffold;Repressor_Mnt;TcdB_toxin_midC;VRP1;VRP3;SL1344_0543;cazy.GH90
CL-2	17	1	Yes	No	msp_1331	Hafnia paralvei	-	-	K12512;K12515;K19734;K11908;K12513;K12514;K13060	DUF2167;DUF3772;MbeB_N;PDEase_II;Tyrosinase;PglL_A;Autoind_synth;TadF	PSLT016;SL1344_3681	-	-	-	-	hypothetical protein;Lipopolysaccharide core biosynthesis protein RfaZ	PSLT016;SL1344_3681;K12512;K12515;DUF2167;DUF3772;MbeB_N;PDEase_II;Tyrosinase;K19734;K11908;K12513;K12514;PglL_A;Autoind_synth;K13060;TadF
CL-135	16	1	Yes	No	msp_0497	Enterococcus faecalis	M00036:Leucine degradation, leucine => acetoacetate + acetyl-CoA ;M00583:Putative peptide transport system	Branched-chain amino acid metabolism;ABC-2 type and other transport systems	K08605;K20384;K20388;K00166;K16916;K16917	CBM39;CRA;DUF4950;Mersacidin;Peptidase_M36;YusW;DUF3224;MepB	lmo0943;lmo1844	-	-	-	-	DNA protection during starvation protein;Lipoprotein signal peptidase (EC 3.4.23.36)	K08605;K20384;K20388;CBM39;CRA;DUF4950;Mersacidin;Peptidase_M36;YusW;K00166;lmo0943;K16916;K16917;lmo1844;DUF3224;MepB
CL-90	14	1	Yes	No	msp_0010	Bacteroides fragilis 1	-	-	K10469;K13959;K19141;K19959;K08646;K10447	DUF5456;fragilysinNterm;HARP;Peptidase_A4;DUF393;DUF5029;Het-C;Peptidase_C58	-	-	-	-	-	-	K10469;K13959;K19141;K19959;DUF5456;fragilysinNterm;HARP;Peptidase_A4;K08646;K10447;DUF393;DUF5029;Het-C;Peptidase_C58
CL-355	13	1	Yes	No	msp_1980	unclassified Proteobacteria	-	-	K06484;K07281;K09611;K20825;K20952;K20951	Cu-binding_MopE;DUF4215;PHB_acc_N;PLDc_3;Stig1;IgGFc_binding;TSP_3	-	-	-	-	-	-	K06484;K07281;K09611;K20825;K20952;Cu-binding_MopE;DUF4215;PHB_acc_N;PLDc_3;Stig1;K20951;IgGFc_binding;TSP_3
CL-418	13	1	Yes	No	msp_1589	unclassified	-	-	K11969;K12382;K13185;K14590;K15365;K17604;K18646;K01152	DUF3839;DUF4108;gp37_C;SapB_2;SapB_1	-	-	-	-	-	-	K11969;K12382;K13185;K14590;K15365;K17604;K18646;DUF3839;DUF4108;gp37_C;SapB_2;SapB_1;K01152
CL-74	12	1	Yes	No	msp_0165	unclassified Lachnospiraceae	M00116:Menaquinone biosynthesis, chorismate => menaquinol ;M00787:Bacilysin biosynthesis, prephenate => bacilysin ;M00859:Bacillus anthracis pathogenicity signature, anthrax toxin	Cofactor and vitamin biosynthesis;Biosynthesis of secondary metabolites;Pathogenicity	K09284;K11030;K19546;K14759;K15657	Binary_toxB;Binary_toxB_2;CXCXC;DUF569	-	-	-	transatpks-nrps;otherks;t1pks-nrps	-	-	transatpks-nrps;K09284;K11030;K19546;Binary_toxB;Binary_toxB_2;CXCXC;DUF569;otherks;t1pks-nrps;K14759;K15657
CL-534	11	1	Yes	No	msp_1816	Citrobacter braakii	-	-	K10930;K10931;K10962;K10965	-	STY4652;STY4653;STY4654;STY4662;t4349;t4350;STY4651	-	-	-	-	hypothetical protein;Glycosyl transferase, group 1 family protein	STY4652;STY4653;STY4654;STY4662;t4349;t4350;K10930;K10931;K10962;K10965;STY4651
CL-71	10	1	Yes	No	msp_0279	Cloacibacillus porcorum	M00031:Lysine biosynthesis, mediated by LysW, 2-aminoadipate => lysine ;M00763:Ornithine biosynthesis, mediated by LysW, glutamate => ornithine ;M00027:GABA (gamma-Aminobutyrate) shunt	Lysine metabolism;Arginine and proline metabolism;Other amino acid metabolism	K03918;K05829;K14611;K00293;K04109;K05828;K16871;K00217	TraY;DUF2703	-	-	-	-	-	-	K03918;K05829;K14611;K00293;K04109;K05828;K16871;TraY;K00217;DUF2703
CL-97	10	1	Yes	No	msp_0905c	Treponema succinifaciens	-	-	K21589;K02383	DUF1926;DUF5312;DUF2259;Endonuc_Holl;Gemini_AL1_M;LEA_2;FlaA	-	-	-	-	Helical-shaped	-	DUF1926;DUF5312;K21589;DUF2259;Endonuc_Holl;Gemini_AL1_M;LEA_2;Helical-shaped;K02383;FlaA
CL-337	10	1	Yes	No	msp_0295	Desulfovibrio fairfieldensis	M00156:Cytochrome c oxidase, cbb3-type ;M00523:RegB-RegA (redox response) two-component regulatory system	ATP synthesis;Two-component regulatory system	K01578;K11914;K11916;K15012;K15862;K20268	Gal-3-0_sulfotr;HBM;DUF4952;DUF4823	-	-	-	-	-	-	K01578;K11914;K11916;K15012;K15862;K20268;Gal-3-0_sulfotr;HBM;DUF4952;DUF4823
CL-209	9	1	Yes	No	msp_0792	Clostridium perfringens	-	-	K00893;K16619;K11059;K11057	Peptidase_M9_N;DUF2173;DUF2227;Phage_Gp17;Plasmo_rep	-	-	-	-	-	-	Peptidase_M9_N;K00893;K16619;DUF2173;DUF2227;Phage_Gp17;Plasmo_rep;K11059;K11057
CL-218	9	1	Yes	No	msp_0082c	Providencia rettgeri 2	M00569:Catechol meta-cleavage, catechol => acetyl-CoA / 4-methylcatechol => propanoyl-CoA ;M00834:Calicheamicin orsellinate moiety biosynthesis, malonyl-CoA => orsellinate-ACP => 5-iodo-2,3-dimethoxyorsellinate-ACP ;M00833:Calicheamicin biosynthesis, calicheamicinone => calicheamicin	Aromatics degradation;Biosynthesis of secondary metabolites	K00446;K21258;K01434	Penicil_amidase;CdiI;Colicin;DUF1133;P22_portal;DUF1345	-	-	-	-	-	-	K00446;K21258;Penicil_amidase;CdiI;Colicin;DUF1133;P22_portal;K01434;DUF1345
CL-262	9	1	Yes	No	msp_0025	Akkermansia muciniphila	-	-	K00731;K00734;K10327;K13957;K19626	DUF3780;PBCV_basic_adap	Rv2734	-	-	-	Oval-shaped	hypothetical protein	K00731;K00734;K10327;K13957;K19626;DUF3780;PBCV_basic_adap;Oval-shaped;Rv2734
CL-382	9	1	Yes	No	msp_0038	unclassified Lentisphaeria	-	-	K17999;K14427	alpha-hel2;DUF1965;DUF2293;DUF2341;End_N_terminal;Phage_TAC_10;DUF2597	-	-	-	-	-	-	K17999;alpha-hel2;DUF1965;DUF2293;DUF2341;End_N_terminal;Phage_TAC_10;K14427;DUF2597
CL-283	8	1	Yes	No	msp_0369	uncultured Desulfovibrio sp. RUG514	M00643:Multidrug resistance, efflux pump MexXY-OprM	Drug resistance	K12212;K12222;K15642;K16394;K16398;K18129	Pox_E10	Rv2934	-	-	-	-	Phenolpthiocerol synthesis type-I polyketide synthase PpsD	K12212;K12222;K15642;K16394;K16398;K18129;Pox_E10;Rv2934
CL-368	8	1	Yes	No	msp_0209	Enterobacter roggenkampii	M00375:Hydroxypropionate-hydroxybutylate cycle	Carbon fixation	K01545;K14466;K19233	YjbE;DUF1427;DUF3274	STM14_3078;lmo0135	-	-	-	-	Oligopeptide ABC transporter, substrate-binding protein OppA (TC 3.A.1.5.1);AIDA autotransporter-like protein	STM14_3078;K01545;K14466;K19233;YjbE;DUF1427;DUF3274;lmo0135
CL-216	7	1	Yes	No	msp_0218	unclassified Christensenellaceae-Catabacteriaceae	-	-	K12376	Ax_dynein_light;CtIP_N;Fungal_TACC;Striatin;Auxin_inducible;JIP_LZII	-	-	-	-	-	-	Ax_dynein_light;CtIP_N;Fungal_TACC;Striatin;Auxin_inducible;K12376;JIP_LZII
CL-237	7	1	Yes	No	msp_1477	Streptococcus mutans	-	-	K15328;K15860;K20321;K20322;K20323;K20324	ComC	-	-	-	-	-	-	K15328;K15860;K20321;K20322;K20323;K20324;ComC
CL-242	7	1	Yes	No	msp_0093	[Clostridium] sp. CAG:62	M00799:dTDP-L-oleandrose biosynthesis	Other carbohydrate metabolism	K09578;K10466;K19856;K01336	Cript;DUF5457;NKWYS	-	-	-	-	-	-	K09578;K10466;K19856;Cript;DUF5457;NKWYS;K01336
CL-266	7	1	Yes	No	msp_0184	Culturomica massiliensis	-	-	K06499;K09649;K12305	Fibrinogen_C;Ig_5;Izumo-Ig;SprB	-	-	-	-	-	-	K06499;K09649;Fibrinogen_C;Ig_5;K12305;Izumo-Ig;SprB
CL-336	7	1	Yes	No	msp_0928	unclassified Clostridiales 1	-	-	K12430	CCDC154;DUF1495;DUF2937;Fzo_mitofusin;Lectin_N;RRM_8	-	-	-	-	-	-	CCDC154;DUF1495;DUF2937;Fzo_mitofusin;Lectin_N;RRM_8;K12430
CL-529	7	1	Yes	No	msp_1234	Parvimonas micra	M00003:Gluconeogenesis, oxaloacetate => fructose-6P	Central carbohydrate metabolism	K03911	BPS;DUF1541;DUF3742;DUF5342;WSS_VP	Lmon1_020100004392	-	-	-	-	Internalin B (GW modules)	K03911;BPS;DUF1541;DUF3742;DUF5342;WSS_VP;Lmon1_020100004392
CL-54	6	1	Yes	No	msp_0395	Brachyspira sp. CAG:700	-	-	K15502;K06595	DUF3522;FBD;DUF3447;Serpulina_VSP	-	-	-	-	-	-	K15502;DUF3522;FBD;K06595;DUF3447;Serpulina_VSP
CL-137	6	1	Yes	No	msp_0409	Pyramidobacter piscolens	M00004:Pentose phosphate pathway (Pentose phosphate cycle) ;M00007:Pentose phosphate pathway, non-oxidative phase, fructose 6P => ribose 5P ;M00034:Methionine salvage pathway ;M00025:Tyrosine biosynthesis, chorismate => tyrosine ;M00699:Multidrug resistance, efflux pump AmeABC	Central carbohydrate metabolism;Cysteine and methionine metabolism;Aromatic amino acid metabolism;Drug efflux transporter/pump	K00815;K13810;K18017;K18016;K18904	SoxY	-	-	-	-	-	-	K00815;K13810;K18017;SoxY;K18016;K18904
CL-206	6	1	Yes	No	msp_0013	Ruminococcus bicirculans	-	-	K17644;K01371	DUF1878;Imm30;SCP1201-deam;zf-4CXXC_R1	-	-	-	-	-	-	K17644;DUF1878;Imm30;SCP1201-deam;zf-4CXXC_R1;K01371
CL-292	6	1	Yes	No	msp_0274	Sellimonas intestinalis == Drancourtella massiliensis	-	-	K14596;K16448;K17835;K18660;K11686	DLIC	-	-	-	-	-	-	K14596;K16448;K17835;K18660;DLIC;K11686
CL-328	6	1	Yes	No	msp_0195	Desulfovibrio piger	-	-	K12205;K00827	Comm;DASH_Dam1;DUF4875;YscK	-	-	-	-	-	-	K12205;Comm;DASH_Dam1;DUF4875;YscK;K00827
CL-393	6	1	Yes	No	msp_1223c	Lactobacillus parabuchneri	-	-	K05999;K08677;K20895	Pro-kuma_activ;DUF1516	lmo2558	-	-	-	-	Autolysin, amidase	lmo2558;K05999;K08677;K20895;Pro-kuma_activ;DUF1516
CL-408	6	1	Yes	No	msp_0037	Bacteroides salyersiae	-	-	K00629;K04367;K06778;K08133;K16307	-	-	cazy.PL14	-	-	-	-	K00629;K04367;K06778;K08133;K16307;cazy.PL14
CL-652	6	1	Yes	No	msp_0031	Bacteroides stercoris	M00186:Tungstate transport system	Mineral and organic ion transport system	K17346;K17512;K20813;K05290	APG17;FAM184	-	-	-	-	-	-	K17346;K17512;K20813;APG17;FAM184;K05290
CL-84	5	1	Yes	No	msp_0378	[Eubacterium] sp. CAG:156	-	-	K03991;K18309;K21490;K21489	Tox-WTIP	-	-	-	-	-	-	K03991;K18309;K21490;K21489;Tox-WTIP
CL-99	5	1	Yes	No	msp_1766	Enterobacter ludwigii	M00268:PTS system, arbutin-like II component	Phosphotransferase system (PTS)	K20258;K02749;K04110;K18535	PA-IL	-	-	-	-	-	-	K20258;PA-IL;K02749;K04110;K18535
CL-129	5	1	Yes	No	msp_0925	Lactobacillus paragasseri	-	-	-	PPV_E2_N;BacteriocIIc_cy;DUF5089;Sds3;AvrD	-	-	-	-	-	-	PPV_E2_N;BacteriocIIc_cy;DUF5089;Sds3;AvrD
CL-217	5	1	Yes	No	msp_0134	Megamonas funiformis == rupellensis	-	-	K16219	ETRAMP;DUF4337;MFS_Mycoplasma;NYD-SP12_N	-	-	-	-	-	-	ETRAMP;DUF4337;MFS_Mycoplasma;NYD-SP12_N;K16219
CL-244	5	1	Yes	No	msp_0916	Bifidobacterium animalis	-	-	K08095;K18980	CBM_10;Cutinase	-	cazy.CBM10	-	-	-	-	K08095;K18980;CBM_10;Cutinase;cazy.CBM10
CL-260	5	1	Yes	No	msp_1801	Haemophilus parahaemolyticus	-	-	K12248	Lipoprot_C;P22_AR_C;TbpB_A;TbpB_C	-	-	-	-	-	-	Lipoprot_C;P22_AR_C;TbpB_A;TbpB_C;K12248
CL-329	5	1	Yes	No	msp_0881	Haemophilus parainfluenzae	-	-	K09929	DUF2618;Imm49;Tmemb_55A	MT2306	-	-	-	-	3-oxoacyl-[acyl-carrier-protein] synthase, KASII (EC 2.3.1.179)	K09929;DUF2618;Imm49;Tmemb_55A;MT2306
CL-379	5	1	Yes	No	msp_0138	Bifidobacterium pseudocatenulatum	M00619:Xylobiose transport system	Saccharide, polyol, and lipid transport system	K17327;K17328;K17326	DUF1713;DUF2530	-	-	-	-	-	-	K17327;K17328;DUF1713;DUF2530;K17326
CL-383	5	1	Yes	No	msp_0048	[Eubacterium] sp. CAG:38	-	-	K12053	DegQ;DUF4305;DUF677;Herpes_UL79	-	-	-	-	-	-	DegQ;DUF4305;DUF677;Herpes_UL79;K12053
CL-384	5	1	Yes	No	msp_0270	unclassified Clostridiales 5	-	-	-	Me-amine-dh_H;Ntox17;XPA_N;zf-FCS;Colicin_D	-	-	-	-	-	-	Me-amine-dh_H;Ntox17;XPA_N;zf-FCS;Colicin_D
CL-405	5	1	Yes	No	msp_0323	unclassified Clostridiales	-	-	K19870	DUF1372;pPIWI_RE_X;Tn7_Tnp_TnsA_C;Tox-HDC	-	-	-	-	-	-	DUF1372;pPIWI_RE_X;Tn7_Tnp_TnsA_C;Tox-HDC;K19870
CL-420	5	1	Yes	No	msp_0782	Candidatus Gastranaerophilales bacterium MH_37 & HUM_20 / Melainabacteria sp. 35_41	-	-	K01568;K21431	DNA_pol_B_palm;DNA_pol_B_thumb;HEPPP_synt_1	-	-	-	-	-	-	K01568;K21431;DNA_pol_B_palm;DNA_pol_B_thumb;HEPPP_synt_1
CL-429	5	1	Yes	No	msp_0131	Phascolarctobacterium faecium	-	-	K20098	DUF5476;Keratin_2_head;Chlamy_scaf;Potass_KdpF	-	-	-	-	-	-	DUF5476;Keratin_2_head;K20098;Chlamy_scaf;Potass_KdpF
CL-500	5	1	Yes	No	msp_1075	unclassified Lentisphaerae	-	-	K10967	DUF3465;Glyco_transf_15;Unstab_antitox	-	cazy.GT15	-	-	-	-	K10967;DUF3465;Glyco_transf_15;Unstab_antitox;cazy.GT15
CL-538	5	1	Yes	No	msp_0578	[Clostridium] sp. CAG:269	-	-	K05677	Barwin;KIF1B;RelB_leu_zip;Sen15	-	-	-	-	-	-	Barwin;KIF1B;RelB_leu_zip;Sen15;K05677
CL-569	5	1	Yes	No	msp_0896	Candidatus Methanomassiliicoccus intestinalis	-	-	K03680;K06873;K09152;K09732	DUF211	-	-	-	-	-	-	K03680;K06873;K09152;K09732;DUF211
CL-672	5	1	Yes	No	msp_0503	Coraliomargarita sp. CAG:312	M00201:alpha-Glucoside transport system ;M00664:Nodulation	Saccharide, polyol, and lipid transport system;Symbiosis	K14760;K19813;K08193	ECSIT_C;Imm32	-	-	-	-	-	-	K14760;K19813;ECSIT_C;Imm32;K08193
CL-75	4	1	Yes	No	msp_0114	Bacteroides coprophilus	-	-	K13420;K18596	OTT_1508_deam	-	cazy.GH5_28	-	-	-	-	K13420;K18596;OTT_1508_deam;cazy.GH5_28
CL-77	4	1	Yes	No	msp_0515	unclassified Clostridium	M00423:Molybdate/tungstate transport system	Mineral and organic ion transport system	K15497	DUF1657;ANAPC10;DUF4073	-	-	-	-	-	-	DUF1657;ANAPC10;DUF4073;K15497
CL-111	4	1	Yes	No	msp_0073	Victivallales bacterium CCUG 44730	-	-	K05687;K01188	HNOBA;DUF953	-	-	-	-	-	-	K05687;HNOBA;K01188;DUF953
CL-116	4	1	Yes	No	msp_0286	Ruminococcus sp. 37_24 & sp. 2789STDY5834934	-	-	K12239	Get5_bdg;MAR_sialic_bdg;B_lectin	-	-	-	-	-	-	K12239;Get5_bdg;MAR_sialic_bdg;B_lectin
CL-121	4	1	Yes	No	msp_0127	Ruminococcus sp. CAG:353 & sp. 2789STDY5834938	-	-	K06563	DUF5376;PGDYG;YtpI	-	-	-	-	-	-	DUF5376;PGDYG;YtpI;K06563
CL-138	4	1	Yes	No	msp_0146c	Streptococcus sanguinis	-	-	K18101	Fanconi_A_N;Mago-bind;Organ_specific	-	-	-	-	-	-	Fanconi_A_N;Mago-bind;Organ_specific;K18101
CL-259	4	1	Yes	No	msp_0234	Catabacter sp. UBA1685 / Clostridia bacterium CIM:MAG 110_1	-	-	K20798	Hen1_L;PNKP-ligase_C;PNKP_ligase	-	-	-	-	-	-	Hen1_L;PNKP-ligase_C;PNKP_ligase;K20798
[truncated: 7,260 more rows]

## Sheet: README
Supplemental Table S7. Characteristics of 7,763 functional clusters. For a more detailed understanding, per functional cluster, we presented the size of the cluster, number of enriched species, enriched MSP identifiers, enriched species names, enriched KEGG modules (hypergeometric tests p <0.01), subsystems of enriched KEGG modules, KEGG orthologs terms, PFAM terms, virulence term, CAZyme terms, …
