# Supplementary material for: Global compositional and functional states of the human gut microbiome in health and disease
Source: Genome Res. 2024 Jun;34(6):967–78. doi: 10.1101/gr.278637.123 (PMC11293553; doi:10.1101/gr.278637.123)
Supplement: Supplement 8 [file Supplemental_Table_S8.xlsx]

## Sheet: Table S8
MSP ID	species	CRC Japan PRJDB4176	adenoma Japan PRJDB4176	UC Spain PRJEB2054	CD Spain PRJEB2054	CRC USA PRJEB12449	CD China PRJEB15371	GDM China PRJEB18755	PD Germany PRJEB17784	ACVD China PRJEB21528	CRC Germany PRJEB27928	Obesity Denmark PRJEB4336	CRC France PRJEB6070	adenoma France PRJEB6070	LC China PRJEB6337	RA China PRJEB6997	CRC Austria PRJEB7774	adenoma Austria PRJEB7774	CRC China PRJEB10878	T1D Luxembourg PRJNA289586	T2D Luxembourg PRJNA289586	VKH China PRJNA356225	T1D Finland SRP006764	ME/CFS USA PRJNA379741	T2D China PRJNA422434	BD China PRJNA431482	adenoma Italy PRJNA447983	CRC Italy PRJNA447983	atherosclerosis Sweden PRJNA177201
msp_0001	Blastocystis sp. subtype 3	0	0	0	0	0	0	-0.000110364	0.00018132	-1.35756e-05	0.000441831	-0.000388986	0	-0.000106454	9.05747e-05	7.29237e-05	0.000228775	-0.000163099	-0.000298969	-0.000347438	0	0	0	0	-6.35811e-05	0	0.000132346	0.000148905	0
msp_0002	Blastocystis sp. subtype 1	-1.37081e-05	0	0	0	0	0	0	-8.62316e-05	0	0	-0.000124618	0	0	0	0	0	0	0	0.000165371	0	0	0	0	-7.46235e-06	0	0	0	0
msp_0003	Bacteroides cellulosilyticus	0.00415798	-0.000289468	-0.0047285	-0.00106187	0.000776739	0.00023725	-0.00153279	0.00102174	-0.00124021	0.000459684	-0.000404355	0.000336835	0.0015228	-0.0020519	0.000441318	-0.000342431	0.000738815	-0.00171978	-0.00294682	0.000853626	-0.000993421	-0.000489583	0.000975359	-0.00133066	-0.00183202	0.00237902	-0.000806505	-0.00797609
msp_0004	Blastocystis sp. subtype 2	0	0	0	0	0	0	0	0	0	0	-7.4589e-05	0	6.30406e-05	0	0	0	0	0	0	0	0	0	0	0	0	0	0	0
msp_0005	Escherichia coli	0.00170684	0.000398915	0.000663523	0.00222721	0.00678371	0.0017872	0.00254475	-0.000455678	0.00826346	0.000254336	-0.00059532	-0.000980386	0.00090349	-0.000574782	-0.000858166	0.00650138	-0.00143434	-0.00105059	0.00625262	0.00212723	-0.00110649	0.00425833	0.000980171	-0.00151595	-0.000492414	0.00357642	0.00893909	0.00549588
msp_0006	Blastocystis sp. subtype 4	0	0	0	0	-0.000107411	0	0	0	0	0	-0.001152	-0.0013983	0	0	0	0	0	-3.05662e-05	0.000254067	0	0	0	5.35668e-05	1.66733e-05	0	0.000290427	-0.000137588	0.000425908
msp_0007	Bacteroides ovatus	0.00386385	0.000949311	0.000801419	0.000461959	-0.00207645	-0.00047286	0.000952417	-0.0015428	-0.000937298	-0.00174642	0.00101211	-0.00110013	-0.00376056	-0.0019032	-0.000669942	0.00157974	0.00110622	-0.00300138	0.000904511	0	0.000990757	-0.00322222	0.0024559	0.00125251	0.00123993	-0.00133975	-0.00375155	-0.000433778
msp_0008	Bacteroides intestinalis	-0.000537156	0.000561305	-0.000291944	0	-0.000677865	-0.0018316	0.000549496	0.000213292	-0.00112228	0.000735322	-0.0022033	-0.00016027	-0.000183072	-0.00180666	-0.00106746	0.000141935	0.000271672	-0.00173648	0.000140446	0.000419446	0.000299971	0	0.00115386	0.00128819	0.00359087	-0.000515896	-0.00223366	-0.000769434
msp_0009	Clostridium bolteae	0.00228567	0.000414979	-0.000443562	0.00155235	0.00289104	0.00161498	-0.00370958	0.000357129	0.0027779	0.000411886	0.000497237	0.00149138	-0.000564411	0.000909178	0.00137925	0.000254056	0.00195104	0.00113298	0.000319192	-0.00018722	0.00270556	0.0009375	0.000868186	0.00334933	0.000713221	0.000668123	-0.000953415	0.000167937
msp_0010	Bacteroides fragilis 1	0.00132261	0.00163966	0.00029916	0	0.000862352	0.000386236	-0.000888622	-0.000656545	0.00264406	0.00319756	-0.000579576	0.000599108	-0.000776681	-0.000591108	0.000938181	0.00185812	-0.000718417	0.00212738	0.000593707	-0.000188012	-0.000701863	0.00422639	0.00303139	0.00195705	0.00206045	0.00184427	0.00278895	-0.00032963
msp_0011	Bacteroides thetaiotaomicron	0.00206372	-0.000375233	0.00209369	0.00166599	-0.00164669	0.000669373	-0.00108158	0.000749673	-0.00081195	0.00180157	0.000652202	0.00239095	0.000573813	-0.000882821	-0.000606257	0.000620226	-0.00138143	-0.0011276	0.00100376	0.00171923	0.00125224	0.00178333	-0.00127736	-0.00123424	0.003552	0.00284763	0.00117749	0.00118123
msp_0012	Parabacteroides distasonis	0.00203903	0.00268532	-0.00174073	0.000749152	0.00314029	0.000949758	0.00341239	0.000861718	-0.00133724	0.000487034	0.0010033	-0.000742465	-0.00146673	-0.00131219	0.00704848	0.00239372	-0.00284548	0.000539839	0.00228698	0.00396513	0.00113965	-0.000604167	-0.0110652	0.00417866	0.0012005	-0.00270746	0.000880211	-0.000896524
msp_0013	Ruminococcus bicirculans	-0.0010089	-0.000463708	-0.00333159	-0.00435607	0.00207921	-0.00369578	-0.000461509	0.00308796	-0.0014149	-0.00345351	0.000394439	-0.000323922	-0.00028347	0.000484906	-0.000582737	0.000487325	-0.000785996	-0.00635782	-0.00194257	-0.000327737	-0.00216967	0.00388125	-0.000589773	0.00117624	-0.00164619	-0.000927063	-0.000939982	-0.00248641
msp_0014	Eisenbergiella tayi	0.00258509	0.00124415	-0.000401286	-0.000692308	0.000683388	-0.000229012	-0.000185895	0.00148318	0.000969554	0.00224991	0.000477145	0.000666853	-0.000227469	0.000938666	0.00123744	0.00329468	0.00291053	0.000760064	-0.000254473	-0.000178193	-0.000566804	-0.003	0.000911802	0.00162179	8.78961e-05	0.000844959	0.00173223	-0.000571187
msp_0015	Roseburia faecis	-0.00191668	0.000511669	0.000632621	-0.00221432	-0.000583223	-0.00845339	0.000565102	-0.0036734	-0.00515764	0.000340846	0.00115094	-0.00166893	-0.000568558	-0.00272673	-0.00439054	-0.0016668	-0.00246699	-0.00269072	-0.00782742	-0.00029985	0.00145855	0	-0.0011547	-0.00119509	-0.00227256	-0.000799421	-0.0028367	-0.000745519
msp_0016	Bacteroides plebeius	0.00260309	-0.000369403	-0.000577147	0.000538462	-0.000183621	0.000242564	0.0019463	-7.44284e-05	-0.00114315	-0.000320768	-0.000364589	-0.000441604	0.00173083	-0.000642893	-0.0026685	0.000131342	-8.98448e-05	-0.0024016	-0.00154524	0.00157447	0.000366217	0	0.000615951	-0.000851625	0.00155479	0.000197086	-0.000445217	0
msp_0017	Roseburia intestinalis	-0.00225664	0.000878782	0	0.000575214	0.000359705	-0.011998	0.000491944	-0.00243595	-0.00552632	-0.00625995	0.0012379	-0.00205685	0.00136169	-0.000672894	0.0010886	-0.000296852	-0.00289591	-0.0059297	-0.00978834	-0.00117968	0.000224599	0.0015	-0.0017019	-0.0103837	-0.000907434	0.000566837	0.000431811	-0.00112819
msp_0018	Clostridium sp. KLE 1755	0.000331054	0.000144937	0.000203912	0	0.000761539	0.000471029	0.000443881	-0.00040868	-0.000597357	0.00110404	-0.000454149	0.000503842	-0.000387023	0.000358812	0.000440239	0.00292245	0.00115568	0.00154863	-0.000223457	0	-0.000238286	0	0.0016518	-0.000419067	0.000723709	0.000397781	-0.000958731	-0.00117257
msp_0019	Bacteroides faecis	-0.000279697	0.000841993	0	0.000573847	-0.000234947	9.28809e-05	0	0.000302992	7.93053e-05	-0.000150215	0.000470716	-0.000548012	-0.000252891	-0.000149188	-0.000274875	-0.000160026	-0.0019534	0	0.00076285	-9.89975e-05	0	0.00384583	-0.000790852	7.38978e-05	0.000539584	-0.00032141	0.000333138	-0.00220139
msp_0020	Clostridium clostridioforme 1	-0.000747795	0.000362523	-0.00033571	0.00199359	0.000283769	0.000593385	0.000162315	0.000119498	-0.000314564	0.00111181	-0.000802589	0.000897369	0.000646249	-0.000208712	-0.00020242	0.000386922	0.00126489	0.000692524	0.000501221	0.000372089	-0.000429732	-0.00169444	0.000890891	-0.00041912	0.000446936	-0.00046436	-0.000259032	0.000413162
msp_0021	Bacteroides xylanisolvens	-0.001069	-0.000848788	-0.0050616	-0.00639209	-0.00044179	-0.000378788	-0.000921376	-0.000298384	-0.00105197	0.00127329	-0.000640726	-0.000740539	0.000415097	-0.00117837	-0.000954338	0.00111064	-0.00608028	-0.00203794	-0.00128659	0	0.00196437	0.00170833	-0.000655547	0.0013882	-0.0012966	-0.00305777	-0.000521521	-0.00306672
msp_0022	Bacteroides finegoldii	0.000431719	0.000236714	0.000665117	0	-0.000549203	-0.000111985	-0.000273022	-0.000501905	-0.00056673	0	-0.000500399	0.000270836	0.000911752	-0.0015284	-0.000747346	-8.29769e-05	0.00224327	-0.00194513	-0.00072124	0	-0.00073405	0	0.000558374	-0.000409122	0.00224742	0.000341337	-0.000567645	-0.00113923
msp_0023	Bacteroides caccae	0.00128412	0.0025796	-0.0016425	-0.000290598	0.0010823	0.000168714	-0.00581588	-0.000667173	0.00179095	0.00375534	-0.00113349	-0.000733595	0.000656417	0.00135821	0.00199566	0.00120771	0.000767473	0.00286998	-0.000841719	-0.000291917	0.0017744	0.00147917	-0.00272575	0.00130114	0.000833568	-0.00240554	0.000580212	-0.00540815
msp_0024	Hungatella hathewayi 2	0.00196259	0.000547447	-0.000643336	0.00319923	0.00103867	0.00117056	0.000488539	-0.000117561	0.00086834	0.00200836	-0.00132279	0.000705109	-0.000326692	0.00535385	-0.000528641	0.00184519	0.000707009	0.00434097	0.00208742	0	-0.00101257	0.00209375	0.00114125	0.00402252	-0.000821267	0.000259264	0.00140892	0.000166832
msp_0025	Akkermansia muciniphila	0.000934269	0.000786546	-0.00372342	-0.00149573	0.000243466	3.5298e-05	8.66359e-05	0.00616594	0.00498985	0.00119922	-0.00147677	-0.000142812	-0.000594829	0.000564416	-0.000384491	0.000533048	-0.000784175	0.000555783	-0.000522595	0.00251371	-0.000401954	-0.000645833	-0.000469136	0.000531345	0.000400166	-0.00127095	0.00429077	0.00145729
msp_0026	Paraprevotella clara	0.00104326	0.00294685	0.0020979	0	-0.00180978	0.000129045	0.00327232	-0.00399331	-0.000211398	0.000233124	-0.000312112	-0.000783486	0.000179705	0.000770637	-0.00294214	0.00125623	0.00108876	-0.000473266	-0.0012668	0.000364048	0.000831761	0	-0.0010932	-0.000281169	0.00311253	-0.00287772	0.000309509	0.000430265
msp_0027	Parabacteroides merdae	0.00129279	0.00071198	0.00220078	-0.00155423	-0.000660911	-0.00104832	0.0016918	-0.000691409	-0.000733654	-0.00398342	0.00060115	0.000892245	0.00199754	0.000465167	-0.00081932	0.0045974	-0.000687845	-0.00166576	0.00123084	0.000909466	-0.000411107	-0.000770833	-0.00396727	-0.00129972	-0.0014944	0.00124109	0.000911473	0.000674855
msp_0028	Parabacteroides goldsteinii	0.00530581	0.0020228	-0.00920149	-0.000297009	-0.000382873	0.000106148	0.000938537	0	0.00109269	0.00153917	9.3662e-05	-0.00146496	-0.000889651	-0.0020731	0.00031797	0	0.000405192	0.000759017	-0.000259313	0.000187915	0.000189606	0	0.000871176	0.00110331	0.000347148	0	-0.000525641	0
msp_0029	Eubacterium eligens	-0.00172722	-0.00137315	0.000927877	0.000655864	-0.000739018	-0.015145	-0.00423903	0.0011787	-0.0071785	-0.00198932	-0.000462417	-0.00178926	-0.00076561	-0.00123504	-0.000895406	0.0010438	-0.000357293	-0.00833128	0.000646305	-0.000942878	-0.000720545	-0.000892361	-0.00177186	0.00090015	-0.000945099	-0.0089201	-0.00440288	-0.00891992
msp_0030	Klebsiella pneumoniae	0.00242071	-0.000313072	0	0.000277113	0.000124627	0.000885699	5.11183e-05	-0.000850874	0.00428999	0	-0.00112073	-0.000202629	-0.000258378	0.00159153	-0.00219397	0.000406559	0.000673093	0.000735847	-0.00058703	0.000902046	0.000369975	0	0.000716126	-0.000926848	0.000749462	0.00048608	0.000655511	0
msp_0031	Bacteroides stercoris	-0.00143186	0.00355978	0.000336846	0.00256019	-0.000697398	-0.000967465	-0.00174916	-0.000352735	-0.000830078	0	-0.000535426	0.000460092	0.00247213	-0.000698947	0.00293465	0.000605523	-0.00110258	-0.000630699	0.000561756	0	-0.00107926	0	-0.00301732	0.00177134	0.00118018	0.000580187	0.000564794	0.000833176
msp_0032	Alistipes onderdonkii	0.00570698	-0.000851687	-0.00261845	-0.000317664	0.00164513	-0.000325852	0.000283769	0.00159804	-0.00062804	0.00201027	0.00148791	0.00146208	-0.000708824	-0.000679524	-0.0006837	0.0038112	-0.00049944	0.00050273	0.00161442	-0.000883238	-0.00191807	0.000708333	0.00096271	0.00106579	-0.0013012	0.000944712	-0.00240784	-0.00150635
msp_0033	Bacteroides fragilis 2	9.26493e-05	0	-0.000620402	-0.000229345	5.02849e-05	-0.000183309	0.00111021	-0.000141017	0.00281145	0.000164954	2.74465e-05	3.47101e-05	0.000250761	0.000574267	-0.000220747	0	-7.59178e-05	0.00258374	-4.65641e-05	0.000485825	-0.00487004	0	0	0.000576645	-0.00204954	0	0.000130571	-0.000271829
msp_0034	Faecalibacterium sp. CAG:74	0.000447823	0.000259878	0.000421818	-0.00217542	-0.00255509	-9.64531e-05	-0.000578948	0.00380762	0.000324843	-0.000762691	0.000306991	-0.000807355	-0.000868658	-0.00249946	0.00104368	0.000434407	-0.00190424	-0.00236906	-0.00170903	0	0.000477596	0	0.000751648	0.000227328	0.00129343	0.000247863	-0.000154507	0.000818803
msp_0035	Bacteroides dorei	0.000589847	0.000644097	0.000635503	0.00200135	-0.000695345	-0.000534847	0.000512109	-0.00122945	0.000484823	0.000530462	-0.000818096	-0.000693225	0.000727413	-0.00231168	-0.00298836	0.0016514	-0.000828689	0.00242073	-0.000626369	7.42078e-05	-0.000762044	0.001436	0.00121931	0.00153159	0.000347646	-0.00196986	-0.00129519	-0.00321218
msp_0036	Bacteroides eggerthii	0.000526737	0.00175315	0.000446878	0.000267094	0.000442005	-9.82983e-05	-0.000538983	-0.000755586	-0.000738995	0.000133079	0.000248709	-0.000335901	0.000576747	-0.00260415	0.00033241	0.0027238	-0.000788674	-0.000717128	-0.00113812	0	0.000861913	0	-0.00112338	-0.00112872	0.00828916	-0.000543272	0.000462426	0.00107103
msp_0037	Bacteroides salyersiae	0.000234835	0.000482571	0	0	0.000608064	0.000147759	0.00199719	0.000131109	-0.000312067	-0.000107441	-0.000330182	0.000332927	0.00157353	0.00047747	0.00265494	0.000610813	0.000224	-0.000962833	0.000637784	0	0.000567209	0	0.000556925	-0.00065059	-0.000395041	0	0.000783861	-0.000835775
msp_0038	unclassified	8.26893e-05	0	-0.00059118	0	0.000312195	0	0.000235263	0.000305464	-0.000144281	0.000136383	-0.000720381	-0.000134025	0.000229084	-0.000608338	5.49212e-05	4.82134e-05	0	-6.67304e-05	0.000227552	0.000631899	0	0	5.89023e-05	-2.57304e-05	8.45515e-05	0.000223345	0.000316771	-0.000287222
msp_0039	Clostridium sp. CAG:127	-0.000289422	0.000213261	0	0	-0.000660199	-0.00155382	0.00100877	0	0.000630915	-0.000207235	-0.000347277	-0.000427732	0.00174278	-0.000684083	-0.000976904	0.000275215	0.000827388	-0.00208597	-0.000198123	0	0.000478534	-0.000427083	-0.000768828	-0.00139801	-0.00115384	0	0.000497721	0.000711385
msp_0040	Bacteroides massiliensis	-0.00102609	-0.000231225	-0.00296259	-0.00682906	-0.000387871	0.000118945	0.000440193	-0.00189095	-0.00336729	-0.00137566	-0.000589725	0.000560391	0.001892	-0.00222798	0.000643872	0.00673605	0.000606906	-0.00575438	-0.00253481	0	0.00119878	0	-0.00221752	-0.00121099	0.00103815	0.00188098	0.00365931	0.000667746
msp_0041	Prevotella copri 1	0.000413211	-0.00101247	0.00115955	0	-0.000438209	0.000462626	-0.000264964	-0.00103569	-0.004769	-0.000127661	0.000831654	0.000323146	0.00239295	0.00230887	-0.0012606	0.0183405	0.00100699	0.000466468	0.000568277	0	-0.00198008	0	0.000493082	-0.00183092	-0.00303139	-0.000441856	0.00177587	0.00233455
msp_0042	Coprococcus eutactus 2	0.00018679	7.41806e-05	-0.00328955	0	-0.000322275	-3.42866e-05	-0.000313097	-0.000647892	-0.000459038	-0.00025339	-0.000756937	-0.00116626	-0.00112313	-0.000339877	-0.00220663	0.000553621	0.00298523	-0.000701715	-0.000611209	0	0.000342435	0	-0.000426696	-0.000160597	0.000313377	0.000423383	0.0011095	0.00139957
msp_0043	Bacteroides coprocola	0.000476709	-0.00015027	-0.000611146	0	3.26812e-05	-0.000378841	0.00141127	-0.000457377	-0.000854834	0	-0.000527363	0.000280183	0.000939829	-0.00123918	-0.000973119	0	0.00215169	0.000569714	-0.000192608	0	0.00232313	0	7.49678e-05	-0.00146795	-0.000601595	-0.000510585	-0.00155634	-0.000784465
msp_0044	Hungatella hathewayi 1	0.0013962	-0.000492803	-0.000379814	0.000746898	0.00166708	0.000400614	-0.000362464	0.000128681	0.00151344	0.00329846	-0.000248811	0.000461205	-0.00118171	0.000900651	0.000618465	0.0015028	-0.000635469	0.00376315	0.00340482	0.000228473	-0.000682485	-0.0004375	-0.000177822	0.000804969	0.00159401	0.00291552	0.00178103	-0.000598751
msp_0045	Ruminococcus bromii 2	0.00157842	0.00091632	-0.00062985	-0.00421588	0.000926929	-0.00464131	-0.000504238	-0.00218608	0.000940526	0.000359392	0.00810032	-0.00560127	-0.00876203	0.000537583	-0.0012549	0.00548747	0.00341086	-0.00193912	-0.00184098	-5.01253e-05	-0.000366302	0.00258333	0.000731951	0.00122977	0.00134418	-0.00286538	-0.00216826	0
msp_0046	Bacteroides uniformis	-0.00110555	-0.0006341	0.000312738	0.00151752	-0.00143124	-0.001698	-0.00536056	-0.000107979	-0.00215291	0.000523683	-0.000816928	0.000851273	-0.000430055	-0.00366448	0.00137069	0.00048968	-0.0028277	-0.00168689	0.00160577	0.00135257	-0.00101661	0.0010625	0.00226952	-0.00131937	-0.000696629	0.00158981	-0.0014699	-0.000676803
msp_0047	Eubacterium sp. CAG:115	6.11409e-05	4.34199e-05	0.000262185	0.000320513	-0.000838778	0	0	0.00429777	5.19021e-05	-6.31017e-05	-0.000704393	-0.000672709	-0.000865179	-0.00016735	0.000174664	-0.000352223	0.000569165	-0.00154152	8.71551e-05	0	-0.000660523	0.000868056	-0.000498167	-0.0015076	0.000621412	-0.00065478	-0.000179436	0.00021709
msp_0048	Eubacterium sp. CAG:38	-0.00099675	-0.000323522	0.000590536	-0.000755983	-0.00121997	-0.00536866	-0.00145756	0.00109667	-0.00236446	-0.000444834	0.00060559	-0.00204992	-0.00107224	-0.0021251	0.000665221	-0.000533811	-0.00108142	-0.00178659	-0.000694905	0	-0.000768919	0.000558333	-0.00337648	-0.00452977	-0.00463013	-0.00100497	-0.00170913	-0.00484968
msp_0049	unclassified Lachnoclostridium	0.000107303	-4.72325e-05	0	-0.000283903	0.000246251	-0.000463058	-7.70293e-05	0.000187211	0.00178641	0.000342649	-0.000274365	0.0014263	0.00131482	9.33274e-05	-9.01584e-05	0.000582575	-0.000401645	-0.000214974	0.00117357	0	-0.000778602	0.00453264	0.000129993	0.00131688	0	0.000957141	0.00032057	0
msp_0050	Eubacterium hallii	-0.00047865	0.000292074	-0.00289377	-0.0020277	0.000955989	-0.00562412	0.00236101	0.000422298	-0.00143563	-0.000932325	0.00104097	-0.0074427	-0.00164035	-0.00430635	-0.00120971	-0.000617833	-0.00114849	-0.00129058	-0.00150451	-0.000497313	0.000610583	0.0004239	-0.00490021	0.00251445	-0.000676355	-0.00693043	-0.00104662	0.000204444
msp_0051	unclassified	0	0	0	0	0	0	0	0	0	0	0	0	0	0	0	0	0	0	0	0	0	0	0	0	0	0	0	0
msp_0052	Blautia sp. CAG:257	-0.00067682	0.00067628	0	-0.000189993	0.000359909	-0.000616177	-0.000422764	0.000589616	0.000583484	-9.894e-05	-0.000245695	-0.00200803	-0.00103544	-0.000833944	0.00139009	-0.000404736	-0.00102547	0.000431109	-0.000108488	-5.4386e-05	7.18176e-05	0	0.00126613	0.000642622	-0.00010758	-0.000303909	-0.00121698	0
msp_0053	Eubacterium siraeum	0.000483107	0.00050279	0.00095079	-0.000478632	-0.00233051	-0.000348451	0.00102532	-0.000389791	0.000407783	-0.0010259	-0.00145152	0.00113446	0.000903295	-0.000186259	0.000488032	0.00120067	0.00114891	-0.000531345	0.000306844	-0.0001	0.000260991	0	-0.000695745	0.000365688	-0.000248114	-0.000205912	0.000937668	-0.00113688
msp_0054	Bacteroides nordii	0.00146977	0.00127687	-0.000801151	0	0.000269157	-0.000821582	-0.00264887	0.000207256	-0.000697072	0.00134845	0.000245676	0.00141671	0.000526651	-0.000816065	0.000532112	0.000718314	-0.000183204	-0.00129293	-0.000373746	0.000249762	-0.000240594	0	-0.00039536	0.00102046	0.00469139	0.000652793	0.000272515	-0.000613931
msp_0055	Firmicutes bacterium CAG:65	0.00234827	0.00116046	0.00415752	-0.00131909	-0.000898248	-0.00484008	-0.00042697	-0.00061216	-0.000434333	0.000224209	-0.00109813	0.000778267	0.00077045	0.000728362	-0.00151926	0.000564032	-0.00113006	0.000592139	0.00186598	0.00031915	0.00176128	0	-0.00125389	0.00109904	-0.00050693	-0.0011195	0.00137273	-0.00470909
msp_0056	unclassified Clostridiales	-0.000972402	-0.000459441	-0.000450247	0.00458789	0.00110227	0.000974962	-0.00293321	0.000139057	-0.000673799	0.00236475	0.000657295	0.00185358	-0.000568681	0.00133077	-0.000722114	0.000133324	-0.00134018	0.00135844	-0.000587567	-0.000279937	-0.00120016	0.00421076	0.00256351	0.00131415	0.00018715	0.000797766	-0.00124747	0.000462459
msp_0057	Roseburia sp. CAG:45	-0.000893607	0.000430001	-0.000246425	0	-0.000580363	-0.00170012	0.000250223	0.000692849	-0.00148164	-0.000375093	0.000816053	0.000385791	-0.000680144	0.000516153	-0.00160163	-0.00119311	-0.000951993	0.00139092	0.00153569	0.000323728	0	-0.00347801	-0.000954223	-0.000367232	-0.000251124	-0.00266064	0.00210261	-0.00182381
msp_0058	Ruminococcus gnavus	0.00189122	-0.000887725	-0.000323296	0.0045415	0.00102065	0.00335671	0.00078657	-0.000468025	0.00266202	0.000473441	-0.000492911	0.000521006	-0.000622135	0.00149786	0.00110861	0.00058369	-0.000795049	0.000482921	0.0010604	0	-0.000954092	-0.0020125	0.00544417	-0.000941693	-0.00112395	-0.000615588	-0.000551743	-0.0010393
msp_0059	Barnesiella intestinihominis	0.00296799	0.00103292	-0.00133368	-0.00311282	0.0004501	-0.000338607	0.00170256	0.000309591	0.000187827	0.000187383	-0.00104525	-0.00112329	-0.000753951	-0.000588852	0.000508552	0.000728554	-0.00235959	0.00225916	0.000740053	0.000497424	0.000548945	0	-0.00260852	0.00109225	0.00101337	-0.0012344	-0.00125338	-0.00158213
msp_0060	Firmicutes bacterium CAG:95	-0.000114299	1.64058e-05	0.00230429	0	-0.000647422	-0.000359937	-0.000267344	0.000259356	-0.00031677	-0.00038356	-0.00102372	0.00060793	0.000357848	-0.00107154	-0.00129165	0.000853284	0.000197818	-0.000957214	-0.000314997	0	0.000484926	0	-0.000749667	-0.000399879	-0.000119022	8.57702e-05	0.000373981	0.000322148
msp_0061	Bacteroides congonensis	0.000152284	0.00033021	-0.000148576	0	-0.000120355	-7.42286e-05	0	0	2.09008e-05	0	-0.000471219	-8.54723e-05	0	-0.000131006	-0.000140578	0	0	0.000108454	0	0	5.68987e-05	0	0	0.000221516	0.000408418	0	0	0
msp_0062	Odoribacter splanchnicus	0.0043558	0.00210561	0.000467177	-0.00136871	-0.00100754	-0.000207883	-0.00135125	-0.00108315	0.000527228	0.00240519	0.000889067	-0.000744467	-0.00103068	-0.00087297	0.00114882	0.00118457	-0.00275847	0.000404514	0.00576229	0.000405257	0.000987621	-0.00240625	-0.00491986	0.00107381	-0.000979752	-0.00217896	0.00348909	-0.00204021
msp_0063	Bacteroides clarus	0.00030022	0.00134591	0	-0.000361823	0.000152522	5.42757e-05	0.0011059	-0.000385645	-0.000168888	7.11916e-05	-0.000486351	-0.000836318	-0.000415106	-0.00452122	0.000273247	-0.000469275	-0.000214929	-0.000964397	0	0.000294861	-0.000130985	0	-0.000120315	-0.00047834	0.000634181	0.000312041	-0.000362084	0
msp_0064	Alistipes sp. CAG:435	-1.46329e-05	0	0	0	0.000487214	0	0	0.000153812	5.59847e-05	0	4.28728e-05	0.0001262	0.000332628	3.62244e-05	-5.62137e-05	-6.16001e-05	0.000242379	-2.54065e-05	-5.07003e-05	0	0.000130195	0	0	1.25387e-05	0.000617084	0	8.10138e-05	0.00102407
msp_0065	Ruminococcus sp. CAG:17	5.02139e-05	5.88546e-05	-0.000791845	-0.000732394	-0.000718972	-2.73935e-05	-0.000119604	0.000563737	-0.000590844	-0.000433111	-0.000651019	-0.000356296	-0.00128851	-0.000129844	-0.00199378	0.00219709	-0.000490947	0.000127444	0.000357472	0.000336675	0	0	-0.00041666	0.000545472	0.000177395	-0.00291629	-0.00209514	-0.000199933
msp_0066	Clostridium sp. AT4	0.000895941	0.00136236	-0.000560896	-0.000341168	0.00047025	-0.00273228	0.00108362	0	-0.00187958	0.000212587	0.000206365	-0.00141265	-0.000295069	-0.000496794	0.000430999	-0.000703872	-0.000246072	-0.000381063	0.000467673	0	-0.00110448	-0.0028125	0.000826307	-0.000586287	-0.000287533	-0.000535793	-0.00164963	0.00106713
msp_0067	Prevotella sp. 109	0.000132188	0.00035903	0.00111437	0	0	-0.000123211	0.000536819	0.000391189	5.70622e-05	0	-8.67717e-05	-0.000649088	-0.000330872	-0.00018601	-0.000103681	7.8761e-05	0	-4.48835e-05	-0.00019577	0.000369982	0	0	0.000533687	-4.82229e-05	-0.00017494	-0.000163518	0.000234035	0
msp_0068	Eubacterium rectale	0.000892486	0.00164541	-0.00408949	-0.00190249	0.00125461	-0.0164261	0.00135	0.000358741	-0.000651448	-0.00113953	-0.00100597	-0.000945502	0.00292479	-0.000514835	-0.00123784	0.000604902	0.00232701	-0.00134457	-0.00164447	-9.23729e-05	0.000589086	0.000690972	-0.00071198	-0.000883031	0.00303033	-0.00218025	-0.000716591	-0.00226583
msp_0069	Bacteroides vulgatus	0.00103549	-0.0012142	0.000768509	0.0102012	0.0014674	-0.000495396	-0.00245678	-0.00082286	-0.00327182	-0.000952817	0.000615698	0.000453264	-0.000957004	-0.000976656	0.00153669	0.00320737	-0.00203247	-0.000805303	-0.0011229	-0.000266834	0.00129422	0.00152083	0.00102032	-0.00245384	-0.000816123	0.00196111	-0.00122744	-0.00452434
msp_0070	Akkermansia sp. CAG:344	0.000355195	-3.37894e-05	-0.000110653	0.00118825	-8.73001e-05	0.000511416	0.000280174	-0.000569139	-0.000196371	0	-0.000209187	-2.63717e-05	0	0.000151418	-7.06685e-05	0	0.000154962	-0.00034354	-7.7068e-05	0	7.2253e-05	0	0.000605989	-0.000356906	0.000829252	-0.000206608	-0.000240445	0
msp_0071	Roseburia hominis	-0.00142634	-0.000450004	-0.00102254	-0.0122111	-0.00353258	-0.0057875	-0.000703091	0.000587114	-0.000730634	-0.000996897	-0.000630385	0.000438588	-0.000579206	-0.000349131	-0.00057504	0.000678658	-0.00119596	0.000512194	0.00301446	-0.00141294	-0.00023312	-0.00209375	-0.000633512	-0.00103009	0.00291801	0.000857237	0.00102582	-0.0023835
msp_0072	Roseburia inulinivorans	-0.00125095	0.00115037	-0.00242298	-0.00956061	0.00196114	-0.00698058	-0.0015278	-0.000699494	-0.00374165	-0.000278205	0.00141065	0.00111633	0.00274356	-0.00044978	0.000606052	0.0010491	-0.00409146	-0.00137992	-0.0126857	-0.000887539	-0.0011485	-0.0058875	-0.0042143	-0.00124457	-0.00326885	0.00118518	0.00173248	-0.00285163
msp_0073	unclassified	0.00067589	0.000118656	-0.000169082	0	-0.000567935	0	0.000560217	-0.000745065	-0.000420767	0.000683547	-0.00110118	0.000290937	-0.00262229	-0.000181722	0.000110344	0	0	-0.000145652	0.00139572	0	0.000213019	0	0.000160178	0.000198529	0.000631284	-0.00135892	-0.00127742	0
msp_0074	Roseburia sp. CAG:100	-4.15462e-05	0	0	-0.000230769	-0.00084277	-0.000276865	-0.000553864	0.00203532	0.000259047	5.11244e-05	-0.000962992	-0.00116795	0.000381862	5.52922e-05	-0.00116705	-0.000181446	0.000241633	0.000198678	0.000305462	0	4.45944e-05	-0.001	0.000500152	-0.000196801	-0.000737527	7.2171e-05	0.000619496	0.00034
msp_0075	Clostridium sp. CAG:91	-0.00120984	-0.00039053	-0.0007124	0	-0.0005117	-0.00624584	-0.000442289	-0.00023605	-0.0046102	-0.00156302	0.00142057	-0.00115725	0.000887739	-0.000468855	-0.00140387	0.000824794	-0.0013984	-0.00378036	-0.0012872	-0.000673204	0.00179058	-0.00108333	-0.00176022	-0.00168921	-0.000550024	0.00118662	-0.0011493	-0.00672571
msp_0076	Blautia wexlerae	-0.000946763	-0.00122049	-0.00152124	0.00302171	0.00225865	-0.00529919	0.00188963	-0.000443876	-0.00099235	-0.000994889	0.000899398	-0.0107445	-0.00311436	-0.00115142	0.00243173	-0.00375814	0.00133884	-0.00134941	-0.00151565	0.0017871	0.00192231	-0.00315625	-0.00251815	-0.00219373	0.00101122	-0.0130206	-0.00171388	-0.000371852
msp_0077	unclassified Firmicutes	-7.92298e-05	-3.37903e-05	0	0	-0.000454605	0	-0.000469089	-0.000153943	0.000278014	0	-0.000426303	-0.000439339	-0.000590847	0.00158909	0.000640646	-0.000216456	-0.0010273	-0.000118453	-0.000719023	-7.48881e-05	0.000343153	0	-3.81332e-05	-8.43339e-05	-0.0011863	-4.80573e-05	-0.000154192	-9.78395e-05
msp_0078	Prevotella sp. CAG:732	1.30836e-05	0	7.32085e-05	0	0	-2.07811e-05	0	0	-0.000288749	0	-0.000107296	-8.02289e-05	0.000104572	0	0	0	0	0	0	0	0	0	0.000617557	-0.000130124	0	0	-0.000198035	0
msp_0079	Clostridium sp. CAG:7	-0.00239189	-0.00137267	-0.00100665	-0.00141062	0.000511901	-0.00503416	0.000526714	-0.000276591	-0.00115463	-0.000648239	0.000799706	0.00116761	-0.0011145	-0.000750135	-0.00148543	-0.0011745	-0.00212416	-0.000868681	-0.00316699	0.00232691	-0.00118784	-0.000645833	-0.000470596	-0.0014282	0.00255185	-0.00884269	-0.00201904	-0.00488158
msp_0080	Prevotellamassilia timonensis	0.000173827	0.000113354	0	0	0	0	0	0	6.95034e-05	0	-1.56047e-05	-0.000302498	-4.96544e-05	-0.000326523	0	0.000261993	0	-2.95037e-05	0	0	-0.00018495	0	-0.000544391	-0.00044479	0.000473224	0	8.27084e-05	0
msp_0081	unclassified Prevotella	1.40942e-05	0.000809167	0	0	0.00104421	0.000162902	0	-6.60351e-05	7.09174e-05	-0.000110668	0.00126869	0.000473955	0.00199349	0.000264936	-3.509e-05	0.000233814	-6.12754e-05	9.25094e-05	-0.00177158	0	-0.00154837	0	0.000523505	2.53268e-05	0	0.000154475	7.9075e-05	0
msp_0082c	Providencia rettgeri 2	0	0	0	0	0	0	0	0	0	0	0	0	6.17661e-05	1.13049e-05	0	0	0	5.9313e-05	0	0	0	0	0	0	0	0	0	0
msp_0083	Parabacteroides johnsonii	0.000898447	0.000580701	-0.00123254	0.000482032	-0.00043619	-0.000391017	0	-0.000237338	-0.000345069	0	-0.000271726	0.000115123	0.0001762	-0.000457899	0.000251423	0.00015179	0.000201757	-0.00016742	-4.92865e-05	0	6.7102e-05	0	-0.000686445	0.0016734	-0.000113448	-0.000493007	0.00022866	0
msp_0084	Prevotella sp. CAG:386	0.000249145	-3.49165e-05	-0.000273645	0	0	9.40034e-05	0.0012523	-8.76101e-05	0.000230523	0	0.000104562	0.000273935	0.000244552	0.000178966	-0.000993013	0.000231528	9.2946e-05	0.000707607	0	0	-0.00085571	0	-0.000235193	-0.000418917	-0.000207792	0	0.000255272	0
msp_0085	unclassified Eisenbergiella	0.000103281	-1.76012e-05	0	0	0	-0.000143917	-0.00013523	-6.57996e-05	0.00011122	0	-8.79859e-05	2.22558e-05	0.000125093	0	-3.56096e-05	-7.46159e-05	-0.000124988	7.20608e-05	-3.0933e-05	0	0	0	0.000209791	3.76596e-05	-3.53927e-05	-4.66189e-05	0	0
msp_0086	Clostridium symbiosum	0.00287486	0.000481154	0	0.00347659	0.00115618	0.000959493	0.000429082	0	0.00092251	0.00159734	-0.00158579	0.00429889	3.76106e-05	0.00268009	0.00167751	0.00119763	-0.000396677	0.00441392	0.000522645	-0.000184698	-0.00263574	-0.000295139	0.00331886	0.00153228	0.00118197	0.00128493	0.0034735	0.000157672
msp_0087	Lactobacillus rogosae	-0.00346345	0.00026389	-0.00341674	-0.00122246	0.000469897	-0.00561882	-0.00384863	0.000746288	-0.00197559	-0.000543414	0.00414118	0.000267794	0.000551061	-0.000662693	-0.0020185	0.00207777	-0.000207571	-0.00158663	-0.00910469	-8.19332e-05	0.00138627	-0.00145139	-0.0020553	-0.000727265	-0.00169935	-0.000893582	0.000479272	-0.000252444
msp_0088	unclassified Butyricimonas	0	0	0	0	0.000153971	0.000120678	0.00165719	0	0.000261155	0	-0.000123689	-8.75594e-05	0.000110231	-0.000633175	0.000551885	0	0	0.000471469	0.00242566	0	0.000495861	0	0	0.00139157	0.000185129	0	-2.98362e-05	0
msp_0089	Alistipes finegoldii	0.00315737	0.00232837	-0.000537238	0.00034188	0.0005067	0.000478096	-0.000136699	-0.00397196	0.00106141	-0.000351883	-0.000438659	0.000796045	0.00118979	-0.000600565	0.00197439	0.00304938	-0.000593882	0.000330026	0.000678746	0	-0.00153645	-0.00084375	-0.00222625	0.000530862	0.00495249	0.00142587	-0.00252509	0.000886053
msp_0090	Alistipes putredinis	0.00113555	0.000517217	-0.00328544	0.000642247	0.00505113	-0.00129449	-0.00250977	0.00139602	0.00130589	-0.00250373	0.00305171	0.00266344	0.00070967	-0.000655175	-0.00101372	0.000807648	-0.00247681	-0.00117586	-0.00162897	-0.000965323	0.000918796	0.00378333	-0.00360765	0.000921209	0.000837508	-0.00172625	-0.000920403	0.000437239
msp_0091	Prevotella sp. CAG:604	0	0.000580041	0	0	0	-0.00018555	0	-0.000395029	0.000103067	0.000606294	-3.60126e-05	-2.63825e-05	-0.000104923	9.82097e-05	0.000187056	0	8.56342e-05	-0.000122039	0.000335516	0	-0.00894623	0	0.00013263	-0.000143784	0.000198925	0	0.000467321	0
msp_0092	Sutterella wadsworthensis 1	-0.000556122	0.000937427	0.000605877	0.000802327	0.000369758	0	0.000116061	-0.000956143	-0.000284184	0	0.000830049	0.000136526	-0.00380624	0.000262605	-0.00376886	0.00089372	0.00051071	-0.00024709	-0.000386919	-0.000223917	-0.000520093	-0.000863889	-0.00115954	-0.00124798	0.00239147	0.0017218	0.00108301	0
msp_0093	Clostridium sp. CAG:62	0.000240394	0.00011793	-0.000633639	-0.00284383	-0.00112933	-0.000430357	0.00234782	0.00254675	0.000517688	-6.12763e-05	-0.00208287	-0.000996558	-0.00207928	-0.000831146	0.00050837	0.000676028	0.001058	-0.00205016	0.00150448	-0.000176743	-0.000460823	0	0.000526623	0.000182382	0.000706092	0.00168486	0.0011104	-0.00504927
msp_0094	unclassified Roseburia	0.000167312	0.00018583	0	0	0	-0.000524682	-6.64242e-05	0	0.000437732	0	1.63942e-05	0	0	0.000471876	0.000221383	0	0	-0.000225073	0	0	-0.000449232	0	0.000103726	0.000511788	-0.00234644	0	0	0
msp_0095	unclassified Eubacterium	0.00017711	0.000444037	-0.0028683	0	-0.000513198	5.75615e-05	0.000725532	-0.000516661	0.000760608	0.000115455	-0.00464668	-0.000663727	0.00066432	-0.00142778	-0.00182335	0.000646834	-0.000524889	0.000374081	-0.000670242	0	-0.000244305	-0.000458333	0.0016895	0.000274858	0.00725704	0.000230027	0.000226188	0.00284997
msp_0096	Bacteroides sp. CAG:443	0	0	0	0	-0.000105147	0	0	0	0	-5.72341e-05	-0.00021577	2.08044e-05	0.000297908	0	0	4.76913e-05	0	0	0.000410846	0.000142791	3.20732e-05	0	0	0	-0.000238314	0	0	0
msp_0097	Paraprevotella xylaniphila	-0.000125457	-0.000118568	0	0	0	0	0.000582405	0	2.33569e-05	-4.03239e-05	0.000204108	-5.40275e-05	0	6.1753e-05	-2.40301e-05	0	0	6.50564e-05	0	0	0	0	0	9.19502e-05	0	-0.000141043	-3.81136e-05	0
msp_0098	Parabacteroides gordonii	0.000258156	0.000452552	0	0	4.83368e-05	0.000202628	0.00101504	0.000151642	0.000609811	0	0	-0.000107089	-0.000250346	0.000264198	0.000172136	0	4.25331e-05	0.000382443	5.52014e-05	0	0.000126694	0	0.000259459	0.000783275	-0.000494751	0	3.51719e-05	0
msp_0099	unclassified	0	0	0	0	-1.96835e-05	0	0	0	0	0	-0.000150138	0	0	0	0	0	0	0	0	0	-0.00146129	0	0	0	0	0	7.77151e-05	0
msp_0100	Morganella morganii	-6.37862e-05	0	0	0	-5.55739e-05	0.000220273	0	0	0.000121032	0	0	0	0	2.80428e-05	0	0	0	0.000304041	0	0	9.71594e-05	0	-5.36215e-05	-4.44189e-05	0	0	0.00165473	0
msp_0101	Bacteroides sp. CAG:875	0	0	0	0	-2.84982e-05	0	0	0	3.04038e-05	-6.37278e-05	3.48731e-05	0.000279751	0	0	0	0.000143698	0	0	0	0	0	0	0	0	0	0	-3.57708e-05	0.000761058
msp_0102	unclassified Bacteroides	0	0	0	0	0	0.000116097	0	0	-6.68098e-05	0	0	0	0	1.92111e-05	0	0	0	3.61646e-05	0	0	0	0	0	-0.000164118	0.000252323	0	0	0
msp_0103	Clostridium innocuum	0.000726679	-0.00181303	-0.000883742	-0.000607669	0.000939636	0.00432261	0.00106658	0.000240458	0.00182277	0.00230963	-0.00015091	-0.000844147	-0.00235182	0.00532346	0.00244497	-0.000370543	-0.00217177	0.00154886	0.00161214	0.00015207	-0.000657152	0.00129375	0.00286203	0.00475917	0.000125386	-0.00236856	0.000792698	-0.000980456
msp_0104	Emergencia timonensis	0.00106419	0.000369578	0	0	-0.00056328	-0.000242412	-8.99247e-05	-3.44048e-05	0.000270096	5.18212e-05	-0.000391446	-7.9907e-05	8.69584e-05	6.3467e-05	9.27737e-05	0.000154859	0.000199927	-0.000324793	0	0	9.40516e-05	0	0.000480278	0.00377291	0.000261906	0	5.13039e-05	0
msp_0105	Ruminococcus sp. CAG:177	0.000134164	0.000153639	-0.00076853	0	0.00108957	-0.000533245	0.0025509	-0.000919473	0.000484501	0.000545175	0.000702938	0.00142813	0.00463916	0.000173857	0.000709322	0.00650791	0.00183837	0.000462523	0.000117443	0	0.000131636	0	-0.000539989	-0.000226417	0.000869417	-7.70207e-05	0.00153954	0.00217121
msp_0106	Firmicutes bacterium CAG:240	-0.000417607	-7.61874e-05	-0.000113919	0	-0.00299819	0	0.000247663	0.000472397	2.66991e-05	-4.74625e-05	-0.000602939	-0.000474748	-0.000474221	0.000116042	0.000302967	-0.000139878	0.000248848	-7.5498e-05	-0.000102748	0	0	0	7.10877e-05	0.000420752	0.000732922	-0.000308956	0.000255511	-0.000302647
msp_0107	Anaerostipes hadrus 1	-0.00366869	-0.00266511	-0.0007894	-0.00108749	-0.00653485	-0.00397275	-0.00110611	0.00104997	-0.00356772	-0.00237772	-0.00143563	-0.0148801	-0.00397554	-0.00124051	0.00259031	-0.00333146	-0.00129185	-0.00109297	0.000356289	0.000302089	-0.000662554	-0.00508056	-0.00136024	-0.00430029	-0.00206666	-0.0073404	-0.00117115	-0.00130295
msp_0108	Enterobacter xiangfangensis	0.00042836	-0.00146856	0	0	-9.20864e-05	0.000146455	0.000407355	0	0.000195347	0.000586943	3.05325e-05	-8.04762e-05	-9.12387e-05	0.00053456	-0.0011046	3.85927e-05	0.000322522	-0.000307407	0.000331553	-0.000164857	0.000216779	0	0.000597454	-0.000444319	-0.000166884	0	0.000190874	0
msp_0109	Clostridium scindens 2	0.00151813	0.00163505	-0.00022616	0	0.00360995	-0.000232078	-0.000904092	0	0.00138302	0.000478884	-0.000220782	-0.000512199	-0.000166534	0.000197097	0.000365419	0.00028844	0.000995711	0.00641031	0.000874657	0	-0.000188039	-0.00075	0.000449234	0.00138966	6.07492e-05	-0.000282753	0.000302024	-0.00186852
msp_0110	Bilophila wadsworthia	0.00125963	0.00106591	0.000261773	-0.000572704	0.0007773	-0.00101158	-0.000924219	0.00204917	-0.00118268	-0.000236861	0.00227453	0.00766119	0.00372167	-0.00523534	0.000845223	0.00109496	0.000610062	-0.0008159	0.0010007	0.00355847	-0.000605797	0.0015	-0.00259842	-0.00109153	0.00217443	0.00278339	0.0010637	-0.000524327
msp_0111	Coprococcus sp. HPP0074	0.00080157	-0.00033957	-0.000387026	0.00303166	0.00174739	-0.000237906	-0.000378322	0.000490308	-0.000430743	0.000156294	5.38893e-05	0.000199913	-4.17128e-05	0.00015924	0.000984554	0.000522393	0.00136642	-0.000572497	0	0	-0.000362943	0.000719792	0.000693758	-0.000716976	-0.000972126	-0.000169959	-0.000117426	0
msp_0112	Blautia hydrogenotrophica	0.000373542	9.89102e-05	0	0.000596154	-0.000254553	0	-0.00018816	6.33521e-05	-0.00016685	0.000108301	-8.35702e-05	-0.000723967	-0.000549287	-4.12146e-05	0.000357026	0.000129588	0.000436203	-0.000116985	-0.000255288	-0.000161388	0	0	0.000608815	9.47629e-05	7.10798e-05	-0.000320786	-0.000216428	0
msp_0113	Blautia producta 2	-0.00213505	-0.000339365	0.00015994	0.000581197	0.000666886	0.000417592	0.000502744	9.11404e-05	0.000367017	0	-4.85676e-05	-0.000910726	-0.00025734	0.000206281	0.00051103	-0.000282963	-0.000838771	-0.000139038	-0.000125754	0.00175325	0	0	-0.000308991	0.00176708	0	-0.00110586	-0.00181696	0
msp_0114	Bacteroides coprophilus	4.72771e-05	0.000223253	-0.000363885	0	0.000213813	0.000271344	-0.000393409	0.000153143	-0.000299062	0	-0.000178581	6.67588e-05	0.00013979	-0.000307557	0.000273678	0.000857274	9.46765e-05	9.82884e-05	0	0	-0.00130558	0	-0.000175241	-0.000174598	0.00187921	-0.000145371	0.000152632	0.000147177
msp_0115c	Lachnoclostridium phytofermentans 2	0	0	0	0	0	0	0	0	-2.11169e-05	0	0	0	0	0	0	0	0	0	0	0	0	0.00119097	0	0	0	0	0	0
msp_0116	unclassified	0	0	-0.000204359	0	0	0	0	0	0	0	-0.000228581	0	0.000668654	0	0	0	0	0	0.000248105	0	0	0	0	0	0	0	0	-0.0010391
msp_0117	unclassified Butyricimonas	-3.29063e-05	9.25409e-05	-0.000625508	-0.000395672	0.000215024	3.12698e-05	0.000538716	-8.73652e-05	-9.03594e-05	5.77717e-05	-0.000305192	0.000205082	0.000293611	8.17209e-05	-0.000764905	5.74201e-05	5.60262e-05	-0.000207154	-0.000238002	0	0	0	-9.16527e-05	-5.92223e-05	0.00025098	-5.12931e-05	-0.000159457	0
msp_0118	unclassified Bacteroides	-2.31963e-05	0	0	0	0	0	0.000273927	0	0	0	7.19404e-05	8.291e-05	0	-0.000207796	0	-8.57874e-05	0.00122994	0	7.23795e-05	0	0	0	-5.51482e-05	0.000119454	0	-0.000258229	-0.000382154	0
msp_0119	unclassified Firmicutes	-6.42954e-05	0	0	0.000244658	-2.72432e-05	0	0	0	1.10148e-05	0	-0.000143689	0	0	-0.000174482	0.000106266	0	6.71344e-05	0	0	0	0	0	8.56161e-05	-0.000123605	0	0	-3.34616e-05	-0.000163126
msp_0120	unclassified	1.13159e-05	0	-0.000117282	0	-4.19269e-05	0	-0.000197788	0	0	0	-0.000194284	4.7249e-05	-6.42886e-05	0	0	0	0	0	0	0.00104338	3.48757e-05	0	0	0	0	-0.000103606	0	0
msp_0121	unclassified Oscillibacter	0.000280119	-0.000262175	0.000569592	0	-0.000394104	-0.00044586	-0.00166861	-0.000458487	0.00154813	0.00013133	-0.00069108	0.00310639	0.000712024	-0.000330685	-0.00105366	0.000683964	-0.00023566	-0.00130349	0.000563875	0	0.000242126	0	-0.000449997	-0.000322431	-0.000943123	0.000214016	0.00128649	0
msp_0122	unclassified Bacteroides	0	0	0	0	0	0	0.000651881	0	-0.000186736	0	0	0	0	0.000117649	-2.46343e-05	0	0	-0.000139543	0	0	-7.06106e-05	0	0	0.000505505	0	0	0	0
msp_0123	Prevotella sp. CAG:520	0.000811423	0.000173237	0.000718525	0	0	0	0.00014408	-0.000974164	-0.000127851	-4.87718e-05	-0.000138157	2.52621e-05	-9.39391e-05	0.000538465	0	4.99964e-05	0	0.000152354	0.000874525	0	0	0	-0.000323892	-6.46661e-05	-0.00392136	4.41626e-05	0.000186109	0
msp_0124	unclassified Ruminococcaceae	-0.000397897	0.000916365	-0.000591078	0.000603244	-0.00143552	-0.00564875	0.000396245	0.00123484	0.00134104	-0.000322926	-0.00147611	0.000342019	0.000747207	-0.00286436	-0.000944806	0.000988094	-0.000824711	-0.00100919	-0.0016405	0	0.000652568	0	-0.00199977	-0.00146589	0.000750946	-0.00257047	-0.00286562	0.00480478
msp_0125	Firmicutes bacterium CAG:24	0.000955085	0.00141385	-0.000665676	-0.000570157	-0.000934951	-0.00230547	0.000432226	-0.000623593	0.000584305	-0.00271038	0.00123617	-0.000774048	0.00205671	-0.000316184	0.000523753	-0.0011815	-0.00126617	-0.00788418	0.000889013	-0.00130009	0.000568389	-0.000752778	0.0012381	0.000873646	0.000865524	0.000709954	-0.00228522	0
msp_0126	Ruminococcus torques	0.00377049	0.000379622	-0.00299566	0.00162179	0.00202141	-0.00256054	0.00067687	-0.000894706	0.00434257	0.000335311	0.00252461	0.00264296	-0.00267409	-0.00359381	0.00120014	0.00518169	-0.000422447	0.00276237	0.00145223	-0.000167558	-0.00339774	-0.00723958	0.00138446	-0.00134774	-0.00113441	-0.000594263	0.00227359	-0.00655999
msp_0127	Ruminococcus sp. CAG:353	-2.02292e-05	0	0	0	-0.000634777	-0.000143686	0	0	-1.71655e-05	0.000100858	-0.00224436	6.14569e-05	-0.000309778	-0.000229228	-0.000389811	0.000142417	0.00018847	0	0.000361088	0	0	0	0	3.57692e-05	-0.000138534	-0.000113586	-0.000170116	-0.000333333
msp_0128	Butyricimonas virosa	0.00130885	0.000582317	0.00148568	0.000496892	0.000760833	0.000207304	-0.00096276	-0.00191684	0.000812519	0.000842601	0.00100107	-0.000779193	0.000288899	-0.00132157	0.00030821	0.00138205	-0.000251831	0.00117955	0.00068674	-0.000270148	0.00048117	0	0.000437414	-0.000849571	0.000785078	0.00104806	0.000967795	-0.00147732
msp_0129	Clostridium sp. CAG:58	0.00107047	-0.000218535	-0.00801704	0.00197125	-0.000487832	-0.000340014	-0.000257657	0.00584139	0.00227836	0.000179727	0.00388273	0.000335854	0.000985122	-0.000461544	0.00471234	0.000406375	-0.00257838	0.000727345	-0.000389134	0	-0.000198438	0.00281875	-0.000531484	0.000663182	0.00460513	-0.000437479	0.00546588	-0.00146271
msp_0130	Candidatus Gastranaerophilales bacterium x14	4.51102e-05	0.000290732	-0.000153026	0	-0.00485975	0	0	0.000411861	0	-0.000226161	-0.000748162	0.000384489	-0.000352304	-5.31654e-05	0	0.00029871	0.000742554	0	-0.000302995	0	-0.000162072	-0.000833333	0.000359708	0	0.000318612	0.000300921	-6.39892e-05	0
msp_0131	Phascolarctobacterium sp. CAG:207	-0.000584215	-0.000324277	0.000344017	-0.000160256	0.000672086	0.000269109	0.00353262	0.000880127	0.00174437	0.00094953	-0.000764732	0.000300111	0.000853003	-0.00343427	0.00100121	-0.000322936	-0.00044403	0.000869658	0.00145583	0	-0.00192094	-0.00244792	0.0018496	-0.0021792	0.000429105	0.000380396	-0.000904343	0
msp_0132	Coprobacillus cateniformis	0.000861547	0.00199482	-0.000362157	0	0.000380968	-0.00182896	-0.000344213	0.000197328	-0.000520985	0.000642418	-0.000193987	-0.000353572	-0.000431983	-0.000328342	0.000357478	-0.000123715	-0.000696092	-0.000391452	0.000314234	0	0	0.00269583	0.000882196	0.00178852	0	-0.000504713	-0.000248767	-0.000985381
msp_0133	Coprococcus sp. 2789STDY5608819	-0.000227021	0.00010411	0.000297793	0	-0.00024056	-0.00235096	0.00327396	0.000208671	0.000290673	0.000120742	9.00696e-05	-0.00133493	-0.00021677	-0.00047086	-0.000392238	-0.000220934	-0.000400995	-0.000367284	-0.000258556	0	-0.000341475	0	-0.000226428	-0.000292585	0.00194916	-0.000190568	-0.000252073	-0.000207388
msp_0134	Megamonas funiformis == rupellensis	0.000507179	0.000520505	0.00046672	0	-8.07424e-05	-0.000349644	0.00375653	0	-0.0016909	0	-4.15623e-05	-0.000335802	0.00162667	-0.000612829	-0.00262803	-0.000121145	-0.00010892	-0.000860583	-0.000137442	0	0.000451909	0	0	0.000852885	0.00217829	-0.000130002	-0.000205521	0
msp_0135	Clostridium clostridioforme 2	0	0	0	0.000689255	0	6.93254e-05	0	0	-8.56277e-05	4.55424e-05	0	2.18198e-05	0	0	-0.000179781	0.000175308	0.000363637	0	0	0	0	0	0	0.00015025	0	0	0	0
msp_0136	Prevotella sp. P4-51	-0.000124553	0.000180739	0	0	7.99175e-05	0	0	-0.000900334	-4.17975e-05	0	-8.04371e-05	0	0	0	4.3249e-05	0.000444049	0	0	0.000389812	0	0	0	0	-3.44194e-05	-7.02269e-05	0	0.000124042	0.000329778
msp_0137	unclassified Prevotella	0	0	0	0	-0.000152032	0	0	0	8.90865e-05	0	-0.000263735	-0.000323806	-0.000185374	-1.31256e-05	-8.93279e-05	-2.92363e-05	0	-0.000154282	-0.000305492	0	0	0	-7.20624e-05	8.99754e-05	0	-8.81285e-05	-0.000299661	0
msp_0138	Bifidobacterium pseudocatenulatum	-0.0021822	-0.00041488	-0.000484931	-0.00048779	0.000303755	-0.000903323	-0.00073299	0.000129823	-0.00590397	4.05149e-05	-2.91528e-05	-0.0011081	-0.00050379	-0.000570323	-0.00138202	-0.00021729	-0.00114664	-0.000770481	-0.00611824	0	0.000301078	0	-0.000439394	0.000906482	0.00461876	-0.000819915	-0.00234746	0
msp_0139	Coprobacter fastidiosus	-0.00191889	0.000306162	-0.00139048	-0.00162008	0.000248226	4.34983e-05	-7.30966e-05	-0.000325715	-0.000126555	-0.000307283	0.000669363	0.00124197	-0.000433397	-0.000347189	-0.0021819	0.000205098	-0.000638158	-0.000936975	-0.000958902	0.00143234	-0.000571246	-0.0018125	-0.00111662	0.000512501	0.00670658	-0.00152161	0.000244959	0.000311111
msp_0140	Klebsiella oxytoca	-0.000155787	3.4484e-05	0	0	-5.17732e-05	0	0	0	-8.7491e-05	0	-0.000174597	0	0	0	-0.000362671	0.00203438	5.52317e-05	0	0	0.00168381	0	0	0	9.91255e-05	0	0.000343035	3.37186e-05	0
msp_0141	Blautia massiliensis	0.00171908	0.00138407	-0.00421405	-0.000570691	-0.00046813	-0.010332	0.00201459	-0.00147036	-0.00140063	0.000202195	0.00456035	-0.00517653	-0.00176801	-0.00102438	0.00180667	-0.001458	-0.00208248	-0.000477737	-0.000793375	-0.00374338	0.000365901	0.00161458	0.000571714	0.000909212	0.00144929	-0.00951346	-0.000833142	0.000693886
msp_0142	Blautia sp. CAG:52	0.00172573	0.000250032	0.00439891	-0.000389499	-0.00169532	-0.000745047	-0.0011716	-0.000795687	0.000314923	-0.000168248	0.00248104	0.000601884	0.000977223	-0.00152042	0.00047079	-0.000482057	-0.000674215	-0.00408834	-0.00242024	-0.000478612	-0.000136193	0	0.000605078	0.00146515	-0.000331806	-0.000692133	-0.000643164	-0.000796578
msp_0143	Parabacteroides sp. CAG:409	-7.19861e-05	0	0	0	0	0	0	-8.66895e-05	-0.000509207	0	3.7234e-05	0	0.0014876	3.54013e-05	0	0	-4.63245e-05	0.00021492	-5.92967e-05	0	0	0	5.08247e-05	2.30699e-05	-6.13527e-05	0	-7.88415e-05	0.000178462
msp_0144	Clostridium sp. CAG:138	0.000248522	0.000124837	-0.0037342	-0.000783654	0.000431587	0	0.00122307	0.00437301	0.000173734	0.00166939	0.000370782	-0.000984462	-0.000257556	-0.000152698	-0.000146746	0.00463267	0.00021342	0.000580169	-0.000308526	0.000179941	0	0	-0.000972041	0.000406347	0.000179953	-0.000477089	-1.03494e-05	-0.000150663
msp_0145	Parasutterella excrementihominis	0.000692491	-0.00023355	-0.000828535	0.00048951	0.000489371	-0.000156908	-0.000597355	-0.000244294	0.00112554	-0.000656303	-0.00186212	-0.000861333	-0.00339476	-0.000701578	0.000930246	0.000199423	-0.000530698	-0.0012717	-0.000424905	0.000201638	-0.000325546	-0.00283333	-0.00210965	0.00059701	0.00145054	0.00044496	-0.000593454	-0.00128955
msp_0146c	Streptococcus sanguinis	0.000829706	-0.000305968	0	0.000238889	0.00077555	-0.000282937	-0.00015248	-0.00021181	0.00367113	-0.000512507	-0.000123163	-0.00407438	-0.00422585	0.000471551	-0.000333334	-0.00153455	-0.00211993	-0.00075882	-0.000277127	-0.000149332	0	0.00075	-0.000959297	0.00069211	0.00109266	-0.000247514	-0.000500425	0.000371481
msp_0147	unclassified	-0.000246108	0.00124115	-9.69851e-05	0	0.00156918	0.000100076	0	0.000115131	0.00019248	0	-0.000279013	0.00128972	0.000288897	-0.000147774	2.9811e-05	5.87112e-05	6.77505e-05	0.000506083	0	0	-0.000191591	0	0.00248621	0.000360413	0	0.000121156	0.000146884	0.000184926
msp_0148c	Veillonella dispar	0.000889192	-0.000653535	0.000235583	0	0.000329749	0.000371342	-0.00755518	0	0.000546927	0.0001527	-0.00208683	-0.00029962	0.000109703	0.0144061	-0.000635418	0.00126189	-0.000914011	0.000326489	0.000823965	0.000216471	0.000530425	0.00567708	0.000373267	0.000577081	0.000724528	0.000700983	9.70177e-05	-0.000157778
msp_0149	unclassified Bacteroides	0	0	0	0	0	5.34219e-05	0.000572912	0	-0.000184273	0	0	0	0	-0.000269854	-0.000179313	0	0	-0.000320494	0	0	3.21889e-05	0	0	-0.000429506	0	0	0	0
msp_0150c	Clostridium methylpentosum	7.16321e-05	0	0	0	0.00050285	0	0	0.000138027	5.42416e-05	0.000313014	-2.41241e-05	2.55777e-05	0.000139713	0	-3.01088e-05	-4.30552e-05	0.000561532	-0.000360273	7.69523e-05	0	0	0	0	-6.75329e-06	0	3.35476e-05	0.00010238	0
msp_0151	Butyricimonas synergistica 2	0.000993302	0.000423437	-0.000812301	-0.000491453	-0.000309551	0.000361506	-0.000372305	-0.000905329	-0.000400894	-0.000235354	-0.000470833	-0.000302479	0.000721339	-0.00169975	0.000577149	-0.000295521	-0.000217741	-0.000907326	0.0026685	0	0.00047652	0	-0.00126625	-0.000502354	0.00286762	0.000505645	-0.000623092	-0.000408687
msp_0152	Ruminococcus faecis	0.0032044	0.00017777	0.000751874	0	0.000462367	-0.00382637	0.00183233	-0.0022332	0.00137917	-0.00378853	0.000946956	-0.001484	-0.000992178	0.00113143	-0.00173171	0.00147761	0.00798566	-0.00599569	-0.00288966	0.00035208	0.000479303	-0.0011875	-0.00711151	0.00068694	-0.000825659	-0.000461268	0.00484484	0.00235877
msp_0153	Erysipelatoclostridium ramosum	-0.00105546	-0.00507983	-0.000122398	0.000531339	0.000820866	0.00450333	0.000894702	-0.000228856	0.0019949	0.00370247	-0.000837169	0.000551945	0.000482642	0.00205321	0.000441847	0.000439102	-0.000864203	0.00287919	-0.00050893	-7.71373e-05	-0.000194559	-0.0030691	0.00342248	0.00919617	0.000203929	-0.000360778	-0.000540063	0.000305785
msp_0154	Fusicatenibacter saccharivorans	-0.000795679	-0.000418662	-0.00362425	-0.00364957	-0.00190224	-0.0059609	-0.000871556	0.00141555	-0.00128537	-0.000598236	0.00156188	0.000485789	-0.000824109	-0.00316525	0.00123814	-0.00134146	0.00229759	-0.00402595	-0.00151322	-0.0009015	0.00141012	0.00189745	-0.00412169	-0.00126833	0.000962852	-0.00181109	-0.000779375	-0.000204646
msp_0155	unclassified Parabacteroides	0	0	0	0	0	2.13825e-05	0	0	-0.000238392	0	0	0	0	-8.88967e-05	0	0	0	9.70386e-05	0	0	-0.0014117	0	0	0.000352154	-9.43628e-05	0	0	0
msp_0156	unclassified Parabacteroides	-0.00013353	5.11883e-05	0	0	0	-0.0001191	5.17852e-05	0	0.000316332	0	0	0	0	0.000246904	-0.000120608	0	0	-0.000126804	0	0	-0.000129232	0	4.64678e-05	0.000669872	0.000752895	0	0	0
msp_0157	Klebsiella aerogenes	0.000172548	0.000308542	0	0	-0.000381461	-0.000238635	-0.00019832	0	0.000251517	0	0	-0.000197161	-0.00022189	0.000516321	-0.000246693	0	0	9.11795e-05	0	0	0.000505601	0	0.000428027	-0.000168496	0.000186118	0.000720924	0.000173883	0
msp_0158	Eubacterium sp. CAG:252	-0.000690502	-4.49011e-06	0.000856616	0	-0.000336134	-0.000586278	0.000891755	0.000510297	0.000290391	0	-0.00175418	-0.000340416	0.000492778	-0.000315407	0.000868489	-0.000591796	-0.000282323	-0.000702498	0.00140394	-4.83272e-05	-0.00162043	-0.000138889	4.82928e-05	-0.00226439	0.000625321	-4.68706e-05	-0.000118855	0.000266325
msp_0159	unclassified	0	-6.67908e-05	-0.00177341	-0.000237223	0.000164671	0	0.00134094	-0.00170334	-0.000113248	-0.000121701	-0.000785467	0.000170926	0.00012506	-0.000119643	0.000452439	0.000186825	0.000182064	0	0.00088583	0	0.000254032	0	-0.000141172	0.000273492	0.000547045	0.00139186	0.000662406	0.0004
msp_0160	Faecalitalea sp. UBA637	0.000850171	0.00206361	0.00142588	0	0.00267224	4.86106e-05	0.0021183	-0.00258645	0.000124144	7.48637e-05	0.000879988	-0.00043281	0.000157523	0.000289771	-0.00099279	0.00134507	0.00312091	0.000216718	-0.000649099	-0.000134914	0	0	-0.000345826	0.000408421	0.000617398	0	-0.000208125	0.000418586
msp_0161	Eubacterium sp. CAG:248	-0.000353449	0.000748917	0	0	0.000636462	-0.000770443	-0.000440376	0.000269656	-0.00309127	-0.000419896	0.00105644	-0.00154996	-0.00039699	-0.000485678	0.000518285	5.67454e-05	0.000437602	0.000360828	-0.000216936	0	3.54598e-05	0	0.000948499	-0.000761185	-0.000248818	0.000221941	-6.48755e-05	-0.000745295
msp_0162	unclassified Blautia	0.00145061	0.000191318	0	0	0	-0.00128882	-0.000683306	0	0.00101372	0	2.25909e-05	-2.50128e-05	-5.20412e-05	0.000494572	0.00175575	0.000168803	-0.000131354	0.00186225	0	0	0.000390304	0	-4.76642e-05	0.000954707	0.00135628	0.000158822	-0.000246061	0
msp_0163	Firmicutes bacterium CAG:227	-0.0004032	0.00145605	9.07569e-05	0	-0.00138267	-0.0010104	0.00363325	-0.000510528	0.000517484	0	0.000125375	-0.000940241	0.000385521	-0.0011836	0.000336349	4.85543e-05	0.00346967	-0.00390542	-0.00059134	0	8.67112e-05	0	-0.00117132	0.000799716	-0.000572696	-0.000193628	0.000254608	0
msp_0164	Ruminococcus sp. 2789STDY5608794	0.00103753	-6.50047e-05	-0.00210063	0	-0.000549821	-0.00730284	-0.000524722	0.00320487	0.00165723	-0.00313041	0.00102517	-0.000510758	-0.000661067	-0.000606691	-0.00236148	-0.000767941	0.00110691	-0.00256894	-0.00240659	-0.000457533	0.000439558	0	-0.00127907	-0.000414848	0.000761063	-0.00320865	0.00111842	0
msp_0165	unclassified Lachnospiraceae	0	0	-0.00062356	0	-0.000224854	0	0	-0.00010477	0	0.000184232	-0.000371481	-2.19444e-05	3.91909e-05	0	0	-0.000160778	0.000111305	-5.74524e-05	0.000119616	0	0	0	0	0	-4.41025e-05	0	4.09432e-05	-0.00036963
msp_0166	Bifidobacterium longum	-0.00172306	-0.00104455	-0.000695848	-0.000740741	-0.000556653	-0.0022567	0.00195852	-0.00064703	-0.00102191	0.000477971	-0.00111638	-0.000923104	-0.0040217	-0.000475523	0.00066733	-0.000477049	-0.00155485	-0.00103151	0.000904444	-0.000517383	0.00227208	0.000916667	-0.000497828	-0.00135405	0.00178675	-0.000935827	-0.00326982	0.00104741
msp_0167c	Plesiomonas shigelloides	0	0	0	0	0	8.77588e-06	0	0	1.17666e-05	0	0	0	0	0	0	0	0	0	0	0	-0.00028497	0	0	-1.4575e-05	0	0	0	0
msp_0168	Firmicutes bacterium CAG:194	1.17167e-05	0.000122029	0.000573059	0	-0.000354287	0	7.2697e-05	-0.000559852	6.7116e-05	-0.000172937	-0.000675363	0.000734321	0.00419477	-1.62462e-05	0.000917832	0.000217973	0.000176547	8.30899e-05	-0.000348806	0.000258051	0	0	-0.000320058	0.000304007	0	0.000152606	0.000430155	0
msp_0169	Roseburia sp. CAG:197	0	0	0	0	-0.000171011	0	0	0.00148757	0	0	0.000350963	-0.000357438	-0.000112244	0	0	-0.000410266	-0.000219072	0	0.000170154	0	0	0	-0.000324217	0	0	0	0.000119376	0.000137222
msp_0170	Azospirillum sp. CAG:239	0.00011791	5.16888e-05	-0.000615114	-0.000879953	0.000221467	0	0	0.000396828	0	-0.000532979	-0.000928305	0.000240941	0.000414198	-0.000225498	0.000163663	0.000453246	0.000334344	0	0.00018208	0	0	0	0.000708944	0	0.00548455	0.000528169	0.0001669	0
msp_0171	Blautia hansenii	0.00140082	0.000258988	0	0	0.000180214	-0.000401514	0.000302893	0	-0.000482953	0.000104902	2.45608e-05	-0.000285818	-6.12287e-05	8.8447e-05	0.000378831	0	5.25509e-05	-0.00106654	0	0	-6.47209e-05	0	0.000353731	-0.000427842	-5.74014e-05	0.000355167	0	0
msp_0172	Ruthenibacterium lactatiformans	0.00926252	0.00227348	0.000432665	0.00105646	0.000960002	-0.000374861	0.00190045	0.00114206	0.00300495	0.0018225	-0.000845211	0.0022054	-0.00445567	-0.00226637	0.00136767	-0.00106509	-0.00190299	0.00280097	0.00184245	-5.82985e-05	-0.000443877	0.0061375	0.00238314	0.00338466	0.00489927	0.00362032	0.00421735	0.000244889
msp_0173	Christensenellaceae bacterium Phil1	7.91204e-05	0.000256826	-0.00516245	0	-0.000586833	0	0.00099283	0.000730915	-9.09892e-05	-5.50446e-05	-0.000496727	-0.000266862	-0.00177895	-0.000110107	0.000649373	0.00242163	-3.72003e-05	0.00134485	0.000176742	0	-0.000164804	0	-0.000108477	0.000148029	-0.000217383	5.78297e-05	-0.000122296	-0.000485185
msp_0174	Klebsiella quasipneumoniae	0.00292214	-2.12788e-05	0	0	-0.000112691	0.000974513	-0.000259269	-6.55702e-05	0.000532238	0	-0.000110912	0	0	0.000221304	0.00034931	5.10109e-05	0.000289601	-0.000249893	8.06802e-05	0	-0.000864145	0	3.84284e-05	-0.000566639	0.000181616	9.73505e-05	8.54104e-05	-0.0004891
msp_0175	Lachnospiraceae bacterium TF01-11	-3.16991e-05	0.000209642	0	0	-0.00123844	-0.000688603	-0.000198407	0.00127881	-0.00171494	-0.000444008	-0.00129362	-0.000578944	0.000903075	-0.00185661	-0.000939909	0.000364972	0.00267752	-0.000235367	-0.00106808	0	0.00119149	0	0.000370569	-0.00140596	0.000427952	0	-0.000659713	-0.000228934
msp_0176	Prevotella sp. P4-65	0.00029394	-0.000126552	0	0	0	-2.66077e-05	0	-0.000229068	0	0.000200965	2.34171e-05	-5.92064e-05	0	7.43411e-05	0.000329654	8.11733e-05	0	0	-0.000198925	0	0	0	0.000292609	0	0.000397361	0	0	0
msp_0177	unclassified Lachnoclostridium	-0.000309701	-0.000115716	0.000476496	0.000494561	-4.03492e-05	8.55237e-05	0.000403147	-0.000155138	-8.60613e-05	0.000162382	-0.00085571	-0.000105394	8.4058e-05	0	1.22117e-05	-4.06182e-05	0.000172505	9.5368e-05	-0.000191519	0.00113055	0	0.0079375	0	5.18488e-05	0	0	-0.000360031	0
msp_0178	Ruminococcus sp. A254.MGS-254	-0.000908442	-7.31806e-05	-0.000347814	0	0.000159988	0	-0.000212338	-0.00082819	-0.000334658	-0.00029971	0.000575292	-0.00132834	-0.000599195	-0.000181242	-0.000373845	-0.000290721	-8.87884e-05	-0.000713569	-0.000338512	0	0.000237857	0	-0.000662911	-0.000111114	0.0011614	-0.000123911	0.000863298	-0.000218952
msp_0179	Coprococcus eutactus 1	-2.01009e-05	0	0	0	0	0	0.000263382	0.00052926	-0.000196348	-8.36896e-05	0.000102992	0	5.95655e-05	-5.42042e-05	-0.000120227	0.000206574	-0.000151281	-2.32379e-05	0.000204867	0	0	-0.000458333	-0.000420923	-7.72308e-05	8.06513e-05	0	-5.78415e-05	0
msp_0180	Blautia producta	-0.000291842	6.69547e-05	0	0	0.000656153	-0.000204013	0.000691279	-0.000284875	0.000513793	4.07017e-05	-0.000303746	0.000107588	4.95091e-05	0.000557695	0.000180585	-0.000182346	-0.000263008	0.00163209	0.000934303	0	-0.000547108	0.00186806	-6.98622e-05	-0.000386722	0	-0.000476362	-0.000203616	0
msp_0181	unclassified Marvinbryantia	0	0	0	0	0.000276577	0	0	0	0	0	-0.000181204	5.97125e-05	0	0	0	-0.000213354	-0.000194767	0	-4.67748e-05	0.000251905	0	0	0.000302862	-1.35822e-05	0	0	9.10531e-05	0
msp_0182	Firmicutes bacterium CAG:424	-2.49374e-05	3.20056e-05	0	0.00150285	-0.000212135	0	0	0	0.000224336	0	2.84347e-05	0.000125503	-3.04921e-05	-0.000140734	-8.25409e-05	0	0	-8.18599e-05	0	0	0	0	0.00117971	8.9428e-05	0	0	0	0
msp_0183	Acetobacter sp. 46_36	-3.27054e-05	4.38512e-05	0.000209901	-0.000990788	-0.000483916	0	0	8.42428e-05	0	9.66281e-05	0.000228056	0.000493157	0.000246621	-3.56068e-05	0	-0.000439398	-0.00118199	-2.8767e-05	4.51225e-05	0	0	0	0.000240349	-1.38786e-05	0	4.70039e-05	-0.00013485	0
msp_0184	Culturomica massiliensis	0	0	0	0	0.000210798	-3.62912e-05	-7.88028e-05	0	0.000117973	0.000173616	0	0	0	-6.00172e-05	-1.53233e-05	0	0	0	0	0	0	0	0	0.000177392	0	0	0	0
msp_0185	unclassified Lachnospiraceae	0.000318396	0.000508334	0	-0.000132479	-0.000140988	0	8.06877e-05	-0.000189086	-0.000119337	0.000140704	-0.000655673	0.000618979	0.000388065	0	4.44134e-05	0.000417338	0.000462791	0	-0.000631886	-2.42867e-05	0	0	0.000365278	-8.4054e-06	0	0.000566044	0.000471198	0.000608778
msp_0186	Clostridium sp. CAG:299	-0.000424795	0.000214299	-0.00177539	0	0.000120785	0.000205535	0.000709878	8.98464e-05	-0.00111945	-4.70069e-05	0.000488788	-0.000167758	0.000597662	-0.0014122	0.00156447	-0.000146176	0	0.000198214	0.000480993	-4.74102e-05	0.000155041	0	0.000315878	-0.00346984	-0.000253374	-0.000596219	-0.000410275	0
msp_0187	Bacteroides sp. Marseille-P3166	1.2284e-05	0	0	0	9.02879e-05	0	9.79778e-05	0	-3.72086e-05	0	-0.000192809	-0.000120088	0.000112423	0	6.36084e-05	-2.22986e-05	0	0	-9.96201e-05	-0.000128627	0	0	0	4.01577e-05	0	0	0	0
msp_0188	bacterium LF-3	0.000840393	0.000251565	-0.00254929	-0.00195885	-0.00074004	-0.00429814	-0.00125011	0.00151262	0.00068134	-0.00154883	-0.000697136	-0.00087743	-0.00178051	-0.00305523	0.00116561	0.000453366	0.0017466	-0.0101213	0.000497898	0.000287218	0.000297951	-0.000597222	-0.00607296	-0.00347257	-0.0014609	-0.000748061	0.00175759	-0.000187866
msp_0189	Blautia sp. CAG:237	-0.000525723	5.66782e-05	-0.00100521	0	-0.0001959	-0.00367388	0.00262857	8.9445e-05	0.000557243	6.58204e-05	0.000176891	0.00022119	-0.0001107	-0.000405143	-0.000592501	0.000184286	-0.000760395	-0.00199932	-0.00119947	-7.97461e-05	0.00174452	0	0.000441218	0.000881775	0.00161877	-0.000929297	-0.000662617	0.000184646
msp_0190	Bacteroides sp. CAG:530	1.62752e-05	0	0.000397167	0	4.42347e-05	-3.20029e-05	0	-0.000522295	-6.1517e-05	7.14464e-05	-0.000115599	7.12839e-05	-7.08436e-05	5.5471e-05	-5.09249e-05	0	0	0	0	0	0	0	-9.85905e-05	0	0	0	0.000120592	0
msp_0191	unclassified Butyricimonas	-4.77437e-05	0.000240811	0	0	0.000610001	0	0	0	-5.57604e-05	0	-4.33761e-05	-0.000261695	0.000138322	0.000103852	0.000107888	-7.09812e-05	-0.000150032	0	0	0	0	0	0.000202385	1.85561e-05	-0.000124342	0	0.000178435	0
msp_0192	unclassified Clostridiales	-5.8198e-05	-3.80202e-05	-0.000228198	0	-0.000111662	0	-0.000120219	0	7.6371e-05	-0.000233003	-0.000943918	0.000250651	0.00102011	-3.07266e-05	0.000107162	6.17642e-05	0.00101609	-0.000212761	0	0	-2.72619e-05	0	0	0.000586614	0.000192421	-8.29731e-05	4.34751e-05	0.000862771
msp_0193	Clostridium scindens 1	-0.000246529	0.000245613	0	0.00224483	0.000444398	0.000246233	0	0	-0.0001776	0.000125361	4.04308e-05	3.68445e-05	-5.4676e-05	-2.64372e-05	-5.60003e-05	-0.000148049	0.000836094	-6.46287e-05	-0.000233467	0	0	0.000866667	0.000650386	6.15831e-05	-0.000119522	0.000250391	0.000229823	0.000170636
msp_0194	Clostridium sp. 42_12	0.000155135	-0.000365612	-0.00268443	-0.00657659	0.000636476	-0.000645633	-0.00147845	0.000558334	0.000147723	-0.00368901	0.00095954	-0.00181203	0.00070277	0.000239973	-0.00103748	0.00317944	0.00418574	-0.00226129	-0.000475223	0	-0.00175619	-0.0014125	-0.000423733	0.000312078	-0.0003483	0.000201045	-0.000402297	-0.00172697
msp_0195	Desulfovibrio piger	0.000202327	0.000334556	-0.00030671	0	0.00163743	0.000166041	-0.000208962	-0.00112241	-0.00042422	0	0.000604852	0.000322245	0.0012601	9.09394e-05	0.000377064	-0.0001195	0.000197576	-0.000843838	0.000637845	0	-0.000202967	0	0.000149012	-0.000293084	0.000813578	-0.000176362	0.000240574	-0.000293393
msp_0196	Alistipes shahii	0.00378204	0.00484985	-0.000987836	-0.00174561	0.000736391	-0.000592041	-0.00214573	0.0104067	0.000626311	-0.0021288	0.00118711	0.0013757	-0.000966766	-0.000665025	0.0010721	0.000694224	0.000632218	-0.00189785	0.000979878	0.000244354	0.000937578	0.000429167	-0.00252826	-0.00133903	0.00202501	0.00337355	0.000868887	0.00172516
msp_0197	Megasphaera sp. BL7	7.63309e-05	0.00353402	0	0	0	-0.000297631	0.000313173	0	0.000228474	0	3.31466e-05	-0.000175728	0	0.000706222	-0.000896812	0	8.7296e-05	-0.000535728	0	0	-7.40876e-05	0	0	0.00156548	0.000149289	9.20305e-05	-0.000148063	0
msp_0198	Coprobacter secundus == Gabonia massiliensis	0.000349719	0.000607739	-0.00199695	-0.000323362	-0.000665404	7.43136e-05	0.000382666	-0.000505144	-0.00190896	-0.000563888	-0.00246483	0.000300282	0.000160809	-0.000291437	0.000543952	-0.000747836	-0.000950859	6.03665e-05	-0.000718418	0.00039586	0	0	0.0001984	-0.000324097	0.00110069	0.000396526	0.00028523	0
msp_0199	Bacteroidales bacterium H8	-0.000149969	0.00037843	-0.000218744	0	0.000105258	-0.000128779	0.00126218	-0.00142505	0.00012816	0	0.00014154	-0.000141896	-0.000293534	0.000246652	-0.000865826	0.000325749	0.000228685	-7.78411e-05	0.000644912	0.000302691	-0.000594076	0	0.000166421	-0.000367066	0.00390099	0.000708522	0.00115866	0.000509212
msp_0200	Anaerostipes caccae	0.00152879	0.000272946	-0.000683755	0.00208789	0.00014072	0.000220812	0.00224946	0	0.000453311	0	0.000388777	-0.000317215	0.00011008	-0.00032786	-0.000233759	0.000139829	0.00053611	-0.000327409	0.000294091	0	-0.00130386	0.0003125	0.00113005	0.002684	0	-0.000100179	-0.000419913	0
msp_0201	Akkermansia sp. KLE1605	2.52075e-05	0	0	0	-9.49887e-05	0	0	0	0	0	-0.00016251	0	0	0	1.40387e-05	4.17137e-05	-7.74906e-05	0	-6.72872e-05	0	0	0	0.000399292	-1.78255e-05	0	0	0	0
msp_0202	Acinetobacter sp. N54.MGS-139	0.000349927	0.000111469	-0.000651826	-0.000698223	-0.000608966	-0.000213098	0.000130095	-0.000157282	0.000164738	6.13902e-05	-0.000130109	7.84172e-05	0.000316986	-0.000185526	0.00114169	-0.000127453	-0.000179866	-0.0012402	-0.00351199	0	-0.000667813	0.00108333	0.00026489	-0.000556224	-0.00147756	-0.000474755	-0.00157344	0
msp_0203	Negativibacillus massiliensis	-0.000375825	-0.000112932	-0.00028225	0.000593175	0.000831853	-0.000606569	0	0.000893857	-0.000516323	0.000582564	8.88413e-05	-9.46728e-05	0.00142494	-0.000716923	-0.000100429	0.000131727	0.00084194	0.00106506	0.000268589	0	0.000180407	0	7.28113e-05	-0.000435494	-0.000327769	-0.000182653	0.000498235	-0.000604531
msp_0204	Clostridia bacterium UC5.1-1D10	0.000971921	0.000254842	0	0	0.000322313	0.000462414	7.72926e-05	0	0.000251236	0.000124665	9.73016e-05	0.000324823	0.000289288	-0.000181149	0.000281398	0.000129792	-0.000114265	0.000189313	-9.79944e-05	0	-0.000120762	0	-0.000749027	0.000232428	0	0	0	0
msp_0205	Firmicutes bacterium CAG:124	0.000344663	-6.96839e-05	-0.000271121	-0.000278632	-0.000177967	-0.000416453	-0.000312822	0.00101141	-0.00036328	-0.000918327	0.000692058	0.000350476	0.000621929	-0.000159619	0.000262653	0.000505997	0.000870758	0.000401476	-0.000292578	5.61698e-05	0.000404347	0.000916667	-0.00086192	-0.000185236	-0.000367805	-0.000940709	-0.000378925	-0.000215556
msp_0206	Butyrivibrio crossotus	0	0	-0.000700009	0	-0.000365452	-2.67332e-05	0	-8.61711e-05	2.45155e-05	-3.48942e-05	-0.000488797	-0.000332728	0.000581128	-8.09812e-05	0	0.000298552	-9.78483e-05	7.21648e-05	-0.000549355	0	0	0	0.000261435	0.000184058	-0.000770367	0	0	0.00108296
msp_0207	Roseburia sp. CAG:380	-0.000656195	0.000116845	0	0	0	-4.2133e-05	0.000424989	0.00108256	9.06085e-05	9.75986e-05	-8.87469e-05	0.000237762	-3.8828e-05	-0.000125489	-0.000620384	-3.78963e-05	-5.45254e-05	7.83915e-05	3.66637e-05	-5.21175e-05	-4.12833e-05	0	0.000229151	0.000233366	0.00444133	0.00034563	0.000451936	0
msp_0208	Ruminococcus sp. Marseille-P328	-0.0014462	-0.00144515	-0.00142998	-0.000941466	-0.00173516	-0.0063349	-0.00187906	0.00220545	0.00271394	-0.000636101	-0.000995736	-0.00114313	-0.00089536	0.00103259	-0.00114858	-0.000905182	0.00137556	-0.00105594	-0.00117633	-0.00150639	0.000737629	0	0.000556018	-0.00177742	-0.000661278	-0.00854463	-0.0014637	-0.000764327
msp_0209	Enterobacter cloacae complex 'Hoffmann cluster IV'	0.000276645	0.00163225	0	0	-9.31542e-05	-0.000230466	-6.67095e-05	0	0.000994379	0	0	-0.00011527	-8.55647e-05	0.000631256	0.000500123	0	0	0.000198517	0	0	-0.000172527	0	0	-0.00103268	0.00122818	0	0.000402305	0
msp_0210	unclassified Clostridiales	0.000630443	0.00124044	0.000264425	0	-0.00044327	2.40768e-05	0	0	-3.80333e-05	7.99683e-05	-0.000202002	-0.000319213	-6.97867e-05	0	3.84212e-05	-4.47026e-05	0.000236168	6.22942e-05	0.000172786	0	0	0	0.000579019	-0.000168055	0	-5.56708e-05	-0.000286863	0.000260444
msp_0211	Mediterranea massiliensis	0	0	0	0	0	0	0	0	0	-3.68573e-05	0	-0.000103539	-5.35883e-05	0	0	0	0	0	0	0	0	0	0	0	0	0	-2.96251e-05	0
msp_0212	Dialister invisus	0.000510831	0.000949503	0.000713409	0.000786325	0.00016027	-0.000717352	0	-0.000217164	0.000657828	-0.00101953	0.000390461	0.000606552	0.000548031	0.00698894	-0.00247264	0.00688786	0.00500885	0.000223885	-0.000963541	-0.000133417	-0.000103366	0.0016875	0.000317	-0.000280585	-6.35507e-05	0.000387445	-0.000482856	-0.000159798
msp_0213	Flavonifractor plautii	0.000686007	-0.00104524	0.000675926	0.00428465	0.00121007	0.000568598	-0.00274794	-0.00042583	0.000596895	0.000470028	0.0025238	0.00616953	0.00187209	-0.000655216	0.00342928	0.00130382	0.00105347	-0.000561627	0.000864047	0.00262215	-0.00148205	0.0038125	0.00198722	0.00159926	0.00199658	0.00178918	-0.00152134	-0.000379105
msp_0214	Alistipes sp. CAG:268	0.000431441	0.000183906	-0.000131612	0	0	0	0	6.3145e-05	1.3138e-05	0.000398763	-0.000593289	0.00033116	0.000535342	3.1578e-05	0	4.07933e-05	3.18524e-05	4.37657e-05	0	0	0	0	0.000624288	1.88446e-05	0	-0.000330843	-0.000465405	-0.00032679
msp_0215	Dialister sp. CAG:357	-8.28728e-05	0	0	0	0	-0.00152977	0.00144195	0.000443056	-0.00136867	-5.65658e-05	-9.56375e-05	-1.73006e-05	0	-0.00135152	-0.00362896	0	0.000145323	-0.000410974	0	0	0.000301768	0	0.00057563	-0.000740731	-0.000368921	0.000402494	-0.000496045	0
msp_0216	Odoribacter laneus	0.0004973	0.0032381	0	0	0	0	0	0	0	0	4.59584e-05	3.56526e-05	0	0	0	0.000167985	0.000110996	0	0.00026916	0	0	0	-0.000241611	0	0	0	-7.56998e-05	0
msp_0217	Bacteroides sp. Marseille-P3108	0	0	0	0	0	0	0.000194443	0	0	0	3.15423e-05	0.000102399	2.65287e-05	7.98737e-05	0	0	0	-9.36163e-05	0	0	0	0	0	0	0	0	0	0.000148202
msp_0218	unclassified	0	0	0	0	0	0	0	0	0	0.00032474	-9.86634e-05	6.35774e-05	0	0	0	-2.48167e-05	0	0	0	0	0	0	0	4.69856e-05	-0.000107079	0	0	0
msp_0219	unclassified Bacteroides	0	0	0	0	0	7.51761e-05	0.000240985	0	-5.55955e-05	0	0	0	0	0	0	0	0	0.000107139	0	0	0	0	0	0.000127542	0	0	0	0
msp_0220	Azospirillum sp. 51_20	0.000336045	0	-0.000597869	-0.00126752	-0.000226879	-6.12334e-05	0.000717135	0.000672293	1.43106e-05	-0.000179629	-0.000184402	0.000198973	0.000185387	-0.000126507	-0.000906355	-0.000334771	-0.000945923	0	0.000436716	0	-0.000758304	0	-0.000146637	-1.17896e-05	0.000362362	0.000321136	0.000160917	0
msp_0221	Acidaminococcus intestini	-0.000235852	0.00034415	0.000233043	0	0.000372103	0.000189136	0.000126631	0	-0.000173931	0.00013053	-0.00054012	0.000128154	-3.32631e-05	-4.2533e-05	0	0.00104619	-0.000132164	0.000483951	9.36924e-05	0	0	0	-0.000673874	0.00023477	0	-0.0012513	0.000312378	0
msp_0222	Clostridium sp. CAG:354_28_25	0	0.000167238	0	0	-8.75447e-05	0	0	0.000158758	0	0.000573461	-0.00396596	6.28689e-05	0	0	0	-9.47062e-05	0.000382405	2.76535e-05	0.000266016	0	0	0	-0.000137219	0	0	-0.000140139	0.000488821	0.0012334
msp_0223	Clostridium sp. L2-50	0	0.000270652	-0.000262031	0	7.36144e-05	-0.000277396	0.000191796	0	0.000119674	-3.94842e-05	-0.000254343	0.000279952	0.000257434	-0.000117943	-0.000237699	0	8.51433e-05	2.60375e-05	-4.93734e-05	0	0	0	0	-9.25853e-05	3.32274e-05	0	5.9512e-05	0
msp_0224	Prevotella copri 2	-0.000403448	6.68361e-05	0	0	0	-0.000609272	-0.000510227	-8.47458e-05	0.000282223	0	-0.000144964	0.000166647	0.000115178	0.00204413	-0.000360078	0.000210235	0.000333662	-0.00053732	0.000502319	0	0.000677987	0	-0.000236841	0.000297284	0.00129182	0	-0.000193207	0.000397037
msp_0225	Alistipes obesi	0.000421874	0.00256906	-0.000264729	-0.00386193	-0.00190493	-0.000224745	0.00050723	0.00604041	0.000805156	-0.00020053	-0.000951348	-0.00113393	-0.00103407	-0.00219928	-0.000844313	0.000840703	-0.000392059	-0.000368734	0.00140759	-0.000163935	-0.000394658	0	0.000607264	0.0010892	0.000913981	0.00211041	-0.000616079	0.000246902
msp_0226	unclassified Desulfovibrionales	0.000209766	0.00182507	-0.000191111	0	0.000165692	0	0	-0.000144273	-2.20863e-05	6.34561e-05	-0.000201538	-0.00012079	-0.000180284	0	4.06896e-05	0	-0.00011541	0	0.000145721	0	0	0	-0.000287614	4.48267e-05	7.46796e-05	0.000699345	4.28922e-05	0
msp_0227	Eubacterium sp. 36_13	-0.000391426	-0.000122779	-0.00245385	-0.00132265	-0.000626605	-0.000368627	0.000621613	0.00282308	-0.001027	-0.000285893	-0.000870844	-0.00292859	-0.000228871	-0.00381337	-0.00102696	0.000312029	0.000973719	-0.0027299	-0.000896998	-0.00097235	-0.000567761	0	-0.000470545	-0.000792473	0.000519107	0	0.000644471	0
msp_0228	Proteus mirabilis	-4.64088e-05	0	0	0	-0.000161416	0.000156037	0	0	5.20306e-05	0	0	0	3.45478e-05	7.0138e-05	0	0	0	8.62445e-05	0	0.00130939	-5.29566e-05	0	0	0.000141317	0	0	0	0
msp_0229	Prevotella sp. 885	-8.91511e-05	0	0	0	0.000174795	0	0	0	-0.000247267	5.05909e-05	0	0.00010923	7.85104e-05	0	0	3.69143e-05	-3.20016e-05	4.87405e-05	0	0	-0.00419777	0	0.000264531	2.96682e-05	0.00135417	-4.01415e-05	0	0.000302667
msp_0230	Alistipes inops == Tidjanibacter massiliensis	0.000551829	0.000370535	0.000668657	0	-0.00201213	0	-9.22996e-05	0.000495115	-0.000282604	-0.000193123	-0.000390408	0.000297699	0.000216109	-0.000204014	-0.000225225	-0.000663714	0.00219998	-0.000115359	0.00327452	0	-0.00121509	0.00173958	-0.000253279	-4.38794e-05	-0.000179486	-9.02807e-05	-0.000363885	0.000823037
msp_0231	unclassified Firmicutes	-0.000583839	0.000438336	0	0	0	-0.00595651	-0.000275269	0	0.00092183	0	0	3.74401e-05	-7.77044e-05	-0.00137356	0.000815083	0	0	-0.000519248	0	0	0	0	-0.000131805	0.000299904	0.0012438	0	0	0
msp_0232	Dorea sp. CAG:317	-0.000213803	2.55815e-05	0.000162361	-0.000233618	-0.000895356	-0.000113057	0	0.000139567	-0.000320975	0.00032262	0.000119608	-0.000509367	-5.12298e-05	-8.12098e-05	5.00474e-05	-0.00126161	-0.000659797	-0.000208272	0	9.15537e-05	-0.000418886	-0.000429167	0.000658559	0.000265341	0	-0.000508675	-0.000395023	0
msp_0233	unclassified Lachnospiraceae	-0.000157317	0.000275195	0	0.00100256	-0.0015372	4.8081e-05	0.000121454	0	0.000302405	0	6.37443e-05	0	0.000601208	7.73685e-05	5.01412e-05	-0.000329111	-0.000286937	-8.60708e-05	0	0	0	0	-0.000855439	-4.74006e-05	0	8.09188e-05	0	0.000216667
msp_0234	unclassified	0	-2.19178e-05	-0.000107676	0	-0.0032729	0	0	0.000751417	2.93534e-05	0.000531648	-0.000313805	9.68585e-05	-0.000380705	-1.63726e-05	4.33614e-05	0.000154766	0.000109808	0.000143633	-0.000844706	0	0	0	-0.00144025	-5.46076e-05	6.87783e-05	-0.000139785	-0.000295656	0.000547973
msp_0235	unclassified Bacteroides	0	0	0	0	3.08792e-05	-6.14297e-05	0.00106299	0	8.81499e-05	0	0	0	0	0.000117155	-0.000773471	0	0	-0.000257144	0	0	-9.50076e-05	0	-8.01837e-05	0.00016538	9.61801e-05	0	-5.1687e-05	0
msp_0236	Eubacterium ventriosum	0.0011233	-0.00034197	-0.00244222	-0.00186628	-0.00080557	-0.00824397	0.000747899	0.000700356	-0.000677246	-0.000312013	0.00123	-0.00140685	0.000126193	-0.00177099	-0.00168657	0.000470076	0.000591841	-0.00398689	0.000634954	0	0.00134231	-0.000404167	-0.0016529	0.0010041	0.0013236	-0.00292791	0.00295145	-0.000214041
msp_0237	Roseburia sp. CAG:182	1.18173e-05	0	-0.000119505	0	0.000891303	0	-0.000134542	0.00325514	2.54959e-05	-9.27082e-05	-0.00116372	-0.000286344	0.000754297	0	0.000236693	-9.92698e-05	0.000301096	-0.000211468	-0.00036334	0	7.20677e-05	0	-0.00107399	-0.000134068	-0.000614361	0.000277806	-6.83372e-05	-0.000660074
msp_0238	unclassified Roseburia	-3.21751e-05	0.000501468	-0.000537363	-0.000267501	-0.00968658	0	0.000181949	0.00424713	1.13168e-05	0.000259288	-0.00254268	-0.00126087	-0.00104978	0	0.000359188	-0.000261775	-0.000281759	8.45584e-05	-0.000210498	-7.5144e-05	0	-0.00218611	-0.000824904	1.68105e-05	0	-0.00204684	0.000498041	-0.000197374
msp_0239	unclassified Dakarella	0.000559993	0.000274948	9.37729e-05	0	-8.47988e-05	-0.0010003	-0.00101485	0	-0.00305277	0.000935661	-0.000160401	3.56733e-05	0.000125124	-0.00292419	-0.000459801	0	0.000282829	-0.00246292	-0.00016588	0	-0.00261685	0	0.000345916	-0.00180238	0.00179502	0.000573675	-0.00176029	-0.000123259
msp_0240	unclassified Clostridiales	0	0	0	0	0	0	0	0	0	0	-0.000115929	0	0	0	0	0.00023662	2.57727e-05	0	0	0	0	0	4.55534e-05	0	0	0	0	0
msp_0241	Klebsiella variicola	-0.000421117	0.000121436	0	0	-0.000253028	1.81228e-05	-0.000348517	6.63156e-05	-0.000351377	0	-0.000349514	0	0	0.000218726	0.0010841	0	0.00010169	0.000580842	-6.91838e-05	0	0.000149819	0	8.65382e-05	-0.000236975	0.000125182	0	0.000104997	0
msp_0242	Anaerotignum lactatifermentans	0.000596798	0.000396432	0	0	0.000205368	-8.45344e-05	0.000572833	-7.4037e-05	0.000134453	0	-0.000123832	0.000309452	-0.000219471	9.93982e-06	6.36688e-05	0.000197333	-0.000112681	8.19977e-05	0	0	0	0	0.00043379	-0.000233345	0.000241271	-4.38259e-05	-0.000263675	0
msp_0243	Clostridium sp. CAG:253	-1.09509e-05	6.0433e-05	0	0	0.000200372	-0.000117229	0	0	-0.000352127	-0.000336638	-0.000288967	-0.00121309	0.000290855	2.85898e-05	0.000361657	0	-0.000104162	0.000104932	0.000626899	0	0.00031817	0	0.00036649	-0.000462677	-0.000287267	0.000110434	0	0
msp_0244	Ruminococcus sp. CAG:60	0.000717925	0.000167509	-0.00389037	-0.00093549	0.000230934	-0.00320392	0.00130499	0.00463674	-0.000452594	-0.00202589	0.00229601	0.000571896	0.00440476	-0.000304174	-0.00286015	-0.000780556	0.000841716	-0.00113921	-0.00282234	-0.000755942	0.00178603	0	-0.000429236	-0.000985691	0.00364538	-0.00375187	-0.000586325	-0.000686519
msp_0245	Megasphaera massiliensis	-6.18463e-05	0.000431798	0	0	0.000223275	0	0	0	0	0.000100904	-7.54253e-05	0	0	0	0	0	0	0	-0.000224365	6.36591e-05	0	0	0	0	0	0	0.000398	0
msp_0246	Tyzzerella nexilis	0.000964487	0.00172136	8.27498e-05	0.000384615	0.000397879	-0.000391045	0.000845584	0	0.000670975	0.00469552	-3.21038e-05	-0.000628112	-0.00104858	0.00130893	-0.00031571	0.000727169	0.000152231	-0.000306688	-0.000331919	0	-0.0010619	0.00425	4.94318e-05	-0.00120655	0.000937687	0.000240622	0	0
msp_0247	Clostridium sp. 44_14	6.16734e-05	0	0	0	3.16951e-05	0	0	0.000629576	0.000171506	0	-0.000754494	-6.45709e-05	0	-9.03784e-05	-0.000136257	0.000133381	-4.92086e-05	-9.17543e-05	0	0	0	0	0.000108034	5.84546e-05	-0.000137984	-4.08352e-05	-3.45423e-05	0
msp_0248	unclassified	0	0	0	0	0	0	0	0	0	0	0	0	-9.58666e-05	0	0	0	0	0	0	0	0	0	0	0	0	0	0	0
msp_0249	unclassified Firmicutes	0.000888507	-0.000382183	-0.00147392	-0.000846866	-0.000938975	-7.90685e-05	-0.000535306	0.000253529	0.00035711	-0.000370611	0.000730205	0.000543332	-0.000768512	-0.000933956	0.00222452	0.00226582	0.000223268	-0.000550182	-0.00128023	0	0.000130912	-0.000770833	0.000702373	0.0033531	0.000766929	0.000837144	0.00100674	0.000604046
msp_0250	Ruminococcus lactaris	-0.000697301	-0.000205715	-0.000473772	-0.000334188	0.00031191	-0.00219779	0.0011053	0.00150787	0.000296166	0.000412456	-0.00162527	-0.000419023	0.00227403	0.000325856	0.00109703	-0.000326763	-0.0032096	0.000355739	0.00200002	-9.3985e-05	0.000623229	-0.001	-0.000703104	-0.000573624	-0.000593805	-0.000641764	0.00118876	-0.00310259
msp_0251	unclassified Prevotella	-9.99373e-05	5.52609e-05	0	0	0	0	7.71296e-05	-7.68925e-05	-0.000615375	0	6.48612e-05	-3.69015e-05	-3.56073e-05	-4.98709e-05	0.000147115	0	-0.000135565	0	0	0	0	0	6.80092e-05	0.000159957	-6.52355e-05	-3.57499e-05	-5.37899e-05	0
msp_0252	unclassified Ruminiclostridium	-4.87091e-05	-1.73723e-05	0	0	-0.000285829	0	0	0	-1.06607e-05	9.06404e-05	8.81272e-05	8.82761e-05	0	0	0	0.00020484	7.70097e-05	0	0	0	0	0	0	-1.27274e-05	0	-3.30561e-05	-4.1578e-05	0
msp_0253	unclassified Bilophila	0	0	0	0	0	0	0	0	0	0.000218254	1.03711e-05	0	0	0	0	0.000152213	0.000234466	0	0	0	0	0	0	0	0	0	0	0
msp_0254	unclassified Lachnospiraceae	0.000709312	0.00108563	0	-0.000256817	-0.000149487	0	0.000413065	-0.00028037	0.000117056	-0.000109688	0.000384156	-0.000288234	-0.000522238	0.000585309	9.53597e-05	-0.000155256	-0.000218334	0.000392993	-5.91191e-05	0	-0.000145224	-0.0005	0.000459185	0.000198035	0	0.000845668	-0.000420721	0.000360684
msp_0255	unclassified	0	0.00010621	0	0	-3.67604e-05	0	0	6.50625e-05	-1.32168e-05	0	-6.76891e-05	-6.96534e-05	0	0	0	-6.39426e-05	0	0	0	0.00133567	0	0	0	-7.51225e-06	0	4.85308e-05	0.000143319	0
msp_0256	Bacteroides sp. CAG:462	0	0	0	0	0	0	0	0	-2.48407e-05	0.000453839	-4.2439e-05	0	0.000128375	0	0	0	-5.29295e-05	0	0	0	0	0	0	9.50508e-06	0	0	0	0
msp_0257	unclassified Prevotella	6.34179e-05	-0.000541679	0	0	0	0	0	0	-9.21572e-05	5.36318e-05	-2.28933e-05	-2.4971e-05	0	0	-1.32601e-05	5.26762e-05	0	0	0	0	0	0	3.1839e-05	9.69245e-06	0	0	9.13027e-05	0
msp_0258	Firmicutes bacterium CAG:102	0.00177944	-0.000518183	0.00299176	0.000401709	-0.000769101	-0.00582165	0.00382837	0.00179716	0.000787482	0.000991816	0.00048676	0.00143242	0.00164489	-0.00117622	-0.000884695	0.00198513	-0.000640142	0.000719821	0.000355823	-7.2995e-05	0.00174257	0	-0.00126982	-0.00168571	0.00087194	0.000217779	0.00483747	-0.000545785
msp_0259	Coprococcus comes	0.000737597	0.000382889	-0.000390869	-0.00538426	-0.00160986	-0.00429597	-0.000294653	0.00134921	0.00134854	-0.00162532	0.00043634	-0.00100084	0.00145818	-0.00189848	0.00104566	-0.00158563	0.00244406	-0.00105572	0.000352964	-0.000367028	-0.00161968	0	-0.000919223	0.000664586	-0.00110197	-0.00143013	0.00132224	-0.000749732
msp_0260	Prevotella sp. KHD1	-0.000166007	4.80766e-05	0	0	3.53797e-05	0	0.000139746	0	-3.50431e-05	0.000361851	9.06091e-05	0	-0.000227532	4.04887e-05	-0.000140595	0.000656041	0.000504059	-0.000945181	0	0	0	0	0	0.000126322	-5.44776e-05	0.00044591	0.00018945	0
msp_0261	Bacteroides sp. CAG:770	0	-1.26395e-05	0	0	2.76544e-05	-3.72322e-05	0	0	0	0	0	-2.2248e-05	0	5.44808e-05	0	3.56763e-05	7.91061e-05	3.18298e-05	0	0	0	0	3.26868e-05	0	0.000830582	0	0	0.000176
msp_0262	Ruminococcus callidus	0.000660432	0.0016705	0	0	-0.000232375	-0.0017864	0.00022702	-0.000124528	-0.000363806	-0.000298556	-0.000333436	0.000570028	0.00255625	-0.00018667	-0.000970812	-0.000268173	-0.000201636	-0.00114132	-0.000170365	0	0.000126803	0.000591667	0.00037773	-0.00138744	0.00065948	-0.000179208	-0.000345457	0.000313778
msp_0263	Bifidobacterium adolescentis	0.000792523	0.000916235	0.00193936	0	-0.000231893	-0.0014228	-0.00144992	-0.000710845	-0.000467241	-0.00035974	-0.000595259	-0.00134028	0.000284961	-8.30283e-05	-0.00119723	-0.000720715	-0.00102853	-0.00147485	-0.000828193	0.000112782	-0.000134463	0.00349722	0.000522222	0.000442948	0.000366046	-0.00105524	-0.00357988	0.0058454
msp_0264	Parabacteroides sp. SN4	-1.3484e-05	0	0	0	0	-8.9962e-05	0	0.000207778	3.21767e-05	0.000189828	-8.264e-05	-0.00023367	-8.20805e-05	0	0	0	-0.000170753	0	0	0	0	0	0	0	0.000814171	0.000287222	2.96758e-05	0
msp_0265	unclassified Faecalibacterium	-4.20079e-05	0	0	0	-2.61389e-05	0	0	-9.04477e-05	-0.000297572	-7.98531e-05	-0.00187084	0.000191745	-0.000340652	8.16225e-05	0.000100766	0	0.000303218	-0.000149146	-8.36685e-05	0	0	0	-3.47666e-05	-4.05607e-05	0.000950731	0.000125352	-0.000666456	0
msp_0266	Fusobacterium ulcerans	0.00132537	0.000690492	0	0	0	0.000511259	-0.000522699	0	-0.000438482	0	0	-2.3586e-05	-3.139e-05	0.000254244	0.000114242	7.0703e-05	3.69568e-05	0.000131943	0	0.00123278	0	0	0	-0.000300853	0	-5.00563e-05	-3.5351e-05	0
msp_0267	unclassified Bacteroides	3.22598e-05	0	0	0	7.15229e-05	0	0	0	4.88039e-05	0	-4.20745e-05	-5.76381e-05	0	6.87034e-05	0	0.000100477	-4.5332e-05	0.000115928	0	0	6.31188e-05	0	-0.000105447	-6.14719e-05	-4.45825e-05	0	0	0
msp_0268	unclassified Blautia	-6.93097e-05	0	0	0	-7.2653e-05	0	0	0	0	0.000165181	1.46753e-05	-4.20826e-05	0	0	0	0	0	0	0	0	0	0	9.3791e-05	0	0	0	0	0
msp_0269	unclassified Clostridiales	8.5389e-05	0	0	0	-0.000161166	0	0	0	0.000136779	0	-0.000239141	-0.000243299	0.000345211	-0.000113512	0.000386008	0.00015423	0	-3.4906e-05	-0.000123597	0	5.16178e-05	0	0.00018227	0.00023096	0.000379242	0	0	0.000359852
msp_0270	unclassified Firmicutes	-0.000109259	0.000287883	-0.000568945	0	-0.00183694	0	0.00137779	0.000619502	6.15575e-05	0.000151043	0.000404636	0.00086196	0.000801464	-0.000238052	0.000674614	-0.000620481	-0.000334979	0.000491911	0.00037678	0	0.000143881	0.00075	0.00080568	0.00102528	0.000282662	-0.00208316	0.000303702	0
msp_0271	Eubacterium sp. CAG:180	0.00122943	0.00060459	0.000132838	0	0.000333225	-0.00169592	0.0017081	0.000400349	0.000338828	-0.000181402	0.00486792	0.000166413	0.00259862	-0.000230686	0.000617072	0.00272042	-0.000397936	0.000873333	0.000654181	0	-0.00132223	-0.00075	-0.000297658	0.000757814	0.000645483	-0.000410143	0.0006488	0.000444889
msp_0272	unclassified Blautia	2.54034e-05	0	0.000147253	0	-8.07786e-05	0	0	0	0	-9.18845e-05	-0.00169877	-6.21742e-05	-0.000244819	0	0	-0.000142371	-0.000451848	0	-0.000563436	0.000273313	0	0	0	0	0	0	0.000232296	-0.00141805
msp_0273	Clostridium sp. CAG:510	0	0	0	0	-0.000181491	0	0.000251982	0	1.56527e-05	0	8.28316e-05	0	0	0	-0.000363644	0	0	0	0	0	0.000229179	0	0	0.000218757	0.00168873	0	0	0
msp_0274	Sellimonas intestinalis == Drancourtella massiliensis	-0.00112583	0.00100762	0.00010464	0	0.000705639	-0.000368012	-9.70439e-05	-4.65837e-05	0.000432685	0.000751559	8.19905e-05	-0.000345958	-0.0008385	-0.000199427	0.000604504	0.000382209	-0.00192822	-0.000319678	0.0012241	0	3.81241e-05	-0.00135069	0.000794717	-0.000362791	0.00030711	-0.000731502	-0.000515907	0
msp_0275	Prevotella stercorea	0.000319688	0.000115687	0	0	4.35831e-05	-4.12621e-05	0.00050175	0	-0.000178508	0	-0.000300134	-8.2026e-05	-7.46229e-05	0.00122203	-0.000121972	0	0.000117309	-8.94087e-05	9.8909e-05	0	-0.00166716	0	5.94202e-05	-0.00221019	0.00054388	0	7.81778e-05	0
msp_0276	Flavonifractor sp. An10	-4.77602e-05	0.000634816	0	0	4.88539e-05	0	-6.99074e-05	0.000237745	0	0.000237614	-0.000242804	0.00103103	0	2.2184e-05	0	0.000245001	-4.95931e-05	0.000126645	0.000223998	0	0	0	0.000234621	1.14645e-05	0	-0.00135884	-0.000299427	0
msp_0277	Eubacterium sp. CAG:251	0.000327613	0.00122574	0.000124778	0	-0.00130242	0	-0.000561834	-0.0022908	0.00224505	0	-0.00073076	-0.000244752	-0.000376955	0.000927762	0.000545429	-0.000562838	-0.00259283	-0.0013273	0.00376046	0	0.000185229	0	-0.000542498	0.000477444	0.00069735	-0.000222751	-0.000449521	0
msp_0278	Erysipelotrichaceae bacterium 3_1_53	0.000239913	7.51609e-05	0	-0.000239736	-0.000246233	0.000333963	0	0	0.000222471	0.000411767	-0.000118834	-0.00139742	8.24397e-05	-7.17917e-05	-0.000453599	0.000249855	0.000149458	0.000188615	-0.000169963	0	0	0.00265625	-0.000135192	0.000291985	5.21544e-05	-9.16087e-05	9.34726e-05	-0.000240556
msp_0279	Cloacibacillus porcorum	0.000218066	1.45536e-05	-0.000584042	0	7.71991e-05	2.97159e-05	-0.00020419	0	0.000271938	4.75898e-05	-4.07262e-05	7.54518e-05	0.000127226	-0.000396028	-0.000355694	2.52954e-05	0.000267363	-0.000370204	0	0	-0.000900283	0	-3.97897e-05	0.000514439	-0.000231823	0	8.41917e-05	-0.000363857
msp_0280	Sutterella wadsworthensis 2	0.000963895	0.0045125	-0.000454895	0	0.00108691	0.000431752	0.000309784	-0.000129458	0.000364686	7.36877e-05	0.000300276	0.000328937	0.000595381	0.000881647	-0.000208436	8.95433e-05	0.000318355	-0.00059361	0.000804667	-6.76692e-05	-0.0032845	0.0011875	0.000278505	0.000449072	-0.00116922	0	0.000469469	0.000621439
msp_0281	Catenibacterium sp. CAG:290	-0.000400063	0.00035127	0	0.000244658	-0.000362056	5.79949e-05	0.000754744	-0.00248614	-0.000150549	-0.000157706	0.000183401	-0.000213342	0.000888353	0.000195312	-0.000191054	0.000669098	0.000370092	0.000844468	0.000265166	0	9.87253e-05	0	0.000175557	-0.000549093	0.000138502	0.00018356	0.000238965	0.000415026
msp_0282	Ruminococcus sp. CAG:330	-5.34767e-05	-5.73664e-05	-0.00169484	0	-0.000253037	0	0	0.000165559	-1.05227e-05	0.000403143	0.000150273	0.000282747	-0.00010102	-2.3961e-05	0.00019441	9.46373e-05	-6.75295e-05	5.15003e-05	0	0	0.000362641	-0.00075	0	0.000234265	-5.5389e-05	0	0	-0.000632132
msp_0285	Clostridium sp. CAG:217	0.000399445	-9.50565e-05	0.000107559	0	-0.000801289	-0.000939802	0.00172923	0.00157932	0.00233603	0.00038489	0.000980833	-0.0017825	-0.00102225	0.000173858	-0.00196818	0.00264757	0.000556606	-0.000371303	-0.00271852	0	0.00085648	0	0.000360317	-0.000497751	0.000720381	-0.000585686	0.00017627	-0.00536277
msp_0286	Ruminococcus sp. 37_24	0	-3.1017e-05	0	0	0.000410434	0	0.00075644	0.00099602	0	0	-0.000218832	6.98148e-05	-6.37517e-05	1.63265e-05	0	0.0035644	0.000101739	-3.92084e-05	-0.000118599	0	0	0	-7.7901e-05	0.000149938	0	7.80635e-05	0.000227408	0.000662852
msp_0287	Alistipes ihumii	0.000823435	0.00289525	-0.000675589	0	-0.00051385	0.000101251	0.00125208	0.000585276	0.00032245	0	0.000670347	0.00091101	0.00135597	-0.000461511	0.00129769	0.000348669	-0.000382398	0.000109368	0.00111596	0.00167174	-0.00062581	-0.000429167	0.00065905	0.000563167	0.00679793	0.00242272	0.00087421	0.000176094
msp_0288	unclassified	-0.000627194	-4.24515e-05	0.000409675	0	4.12427e-05	2.90848e-05	0	-0.000259015	-0.00194045	0	0.000436447	6.41525e-05	0.00308378	0.000765103	8.51432e-05	0	4.07486e-05	0.000994075	0	0	-0.00152054	0	-0.000167808	-0.00033438	0.00261156	0	-0.000150203	0.000690838
msp_0289	Fusobacterium varium	0.000144622	0	0	0	0	0.000902136	0.000141395	0	0.000965282	0.000296156	0	0	0	0.000330718	-6.47571e-05	5.28669e-05	0	0.000655132	0	0	-0.000244887	0	0	-0.0021754	7.35743e-05	0	2.2001e-05	0
msp_0290	Clostridium sp. CAG:352	-2.23893e-05	-2.45107e-05	0	0	-0.000167812	4.17865e-05	-0.000294018	7.50449e-05	-0.000547945	-4.06837e-05	-0.000425691	0.000368365	-0.00037507	8.44711e-05	-0.000112354	0.000196541	0.00109904	0.000270074	-9.11559e-05	0	6.62675e-05	0	0.000477245	-7.78781e-05	0.00049783	0.000136204	0.00012849	0
msp_0291	unclassified Clostridiales	0.000860832	-0.000462988	-0.000648354	-0.00230627	0.00260466	-0.000362795	0.00201119	-0.00128258	0.000210363	-0.00203772	-0.000493198	-0.00036519	0.000749285	-0.00107321	0.000400756	0.000781785	0.00137157	0.000457337	0.00507881	-0.000722786	0.000153889	-0.00307917	-0.00109611	0.000391001	0.00288493	-0.00109792	0.000957139	0.000851667
msp_0292	unclassified Lachnospiraceae	0	0.000246388	0	0	3.78805e-05	0	0	0.000271507	2.57384e-05	0	-5.32075e-05	0.000253117	0.000110845	-1.56401e-05	4.4342e-05	0.00131986	0.000199775	0	5.20982e-05	0	0	0	0.000172533	0	0	0	-9.59823e-05	-0.000155556
msp_0293	unclassified Bacteroides	-3.34595e-05	0	0	0	6.8413e-05	0.000471665	-0.000128823	0	-0.000342149	0	0	0	0	-0.00027524	5.30388e-05	0	0	-9.47356e-05	-5.03432e-05	-6.61654e-05	0	0	0	-0.0001724	0.00126451	0	0	0
msp_0294	Butyrivibrio sp. CAG:318	0	0	-0.000114322	0	-5.82164e-05	0	0	-0.000149915	3.25859e-05	0	-8.40756e-05	-0.000275453	9.73678e-05	4.69025e-05	2.50721e-05	-8.39118e-05	4.25138e-05	0	0.000158468	0	0	0	-0.000994869	2.18701e-05	0	0.00046466	0.000307007	0.000539718
msp_0295	Desulfovibrio fairfieldensis	-4.30471e-05	-5.85298e-05	-0.000468722	-0.000284539	4.51484e-05	0	-5.32236e-05	0.000140255	0.0003644	0	-0.000736194	5.30328e-05	0	-8.00036e-05	-0.000269756	0	0	0.000316499	0	0	0	0	0.000125697	0.00012624	0	5.52883e-05	-2.90441e-05	0
msp_0296	unclassified Lachnospiraceae	-0.000367634	9.32829e-05	-0.00181431	-0.00287257	-0.00277396	-0.000403098	0.000171484	0.00621791	0.000277568	-0.000421826	0.00146366	0.000620017	-0.000613167	-9.255e-05	0.000889604	-0.000327529	0.000742624	-0.00132443	-0.000284397	-0.000106157	0	0	0.00110477	0.000425052	-0.000362783	-0.000264014	-0.000717699	-0.00529928
msp_0297	unclassified Ruminococcaceae	9.69388e-05	-0.000124704	-0.000351229	0	0.000536579	0	0.000524403	0.00141092	5.30924e-05	0.000569773	-0.000414651	0.00156281	0.00183061	0	-0.000182011	0.000957135	5.84885e-05	0	7.28582e-05	0	0	0	0.000294261	-5.99801e-05	-0.000351216	0.000745189	0.000467956	0
msp_0298	unclassified Firmicutes	1.02059e-05	6.80423e-05	0.000164905	0	-0.000129834	0	7.50159e-05	0.000286184	0	0.000506962	-0.00148954	-0.000260374	-0.000469387	0	0	-5.77228e-05	0.000411579	0.000221289	0.000156377	0	0	0	4.06432e-05	0.000109438	0	0	0.000362515	-0.00057782
msp_0299	Eubacterium ramulus	0.0013035	0.00163204	0	0.00139316	-0.000559171	-0.00169294	0.00390104	-0.00106552	-0.000403864	-0.00209037	0.000505733	0.000443485	-0.00110189	-0.000672055	0.00078477	0.000318109	-0.000696083	-0.000565478	-0.000558904	0.00343169	-0.000607539	0	-0.00539761	0.00244187	-0.000526135	-0.000768111	0.00070895	-0.000594449
msp_0300	unclassified Bacteroidales	0	0	0	0	0.000283227	0	-7.87357e-05	-0.000213089	0	0.000422166	-1.29872e-05	-0.000281678	0.000209888	0.000143316	-3.77753e-05	0.000102202	0.000317304	0	0.000725031	0	-0.00262155	0	0.000238536	1.74336e-05	-0.00516681	0.000129314	0.000149075	0
msp_0301	Faecalibacterium prausnitzii 1 (A2-165)	-0.00100482	-0.000510724	0.00345267	-0.000692308	0.000447408	-0.00261742	0.000638272	-0.00114176	-0.000596624	-0.00242757	0.000829211	0.00021141	0.00248236	-0.000806538	-0.00184639	0.000990472	0.00291302	-0.000837071	-0.000759294	0	0.000815103	0	-0.00572546	-0.000488775	0.00071943	0.00125707	-0.00281322	0.000755196
msp_0302	unclassified Clostridiales	-7.67688e-05	-2.08923e-05	-0.000516119	0	0	0	-0.000617616	0	0.000149202	0	0.000228933	-7.59752e-05	0.00044943	-0.000315503	-0.00045913	0.000116944	0.000412529	-0.00174143	0	0	-0.000176644	0	0	-0.000269498	0	0	7.99437e-05	0.000529977
msp_0303	unclassified Clostridiales	0.000104774	8.10459e-05	-8.17949e-05	0	-0.00059375	-3.9174e-05	-5.0816e-05	0.00421106	-0.000150623	0.000652851	-0.000736656	0.000731843	-0.000418628	0	-7.52872e-05	0.00055453	0.00191847	-3.30392e-05	-0.00079426	0	0	0	-0.000109955	1.69881e-05	0	-7.90812e-05	0.000379782	0.000286582
msp_0304	Alistipes sp. CAG:514	-1.78688e-05	3.89096e-05	-0.000196361	0	0.000146377	0	0	-0.000701983	0	0.000235989	0.000124168	0	0	0	0	-0.00033538	-0.000128456	0	-8.12254e-05	0	0	0	-0.000103548	0	0	-4.733e-05	0	0
msp_0305	Roseburia sp. CAG:303	-0.00253236	2.58053e-05	-0.000342506	0	-0.000403282	-5.25788e-05	-0.000221132	0.000214367	-0.000913443	0	-0.00142217	-0.000711493	-0.000235274	-0.000132199	0.00130272	-2.74206e-05	-0.000120281	-0.000298882	-0.000168351	0	-0.000450875	0	-0.000252383	-0.000807128	-0.00160389	0	-3.67362e-05	0
msp_0306	Firmicutes bacterium CAG:176	0.000118655	5.20277e-05	-0.00288839	-0.00251745	-0.00117264	-4.65152e-05	0	-0.000588253	-0.000105541	0.000769617	0.000366237	0.000131573	0.00124321	-5.15839e-05	0.000324991	0.00197693	0.00164581	0.000398057	0.000521181	0	-0.000293088	0	0.000464535	-0.000118803	-0.000356008	-0.000419789	-0.000665892	0.002002
msp_0307	Dorea longicatena 1	0.00154776	-0.000336119	-0.00174196	0	0.000374557	-5.55993e-05	0.000793814	-0.00056164	-0.000307032	0.00011557	0.000428374	0.000381535	0.0011773	0.000199482	0.00079984	0.00149605	-0.00073401	0.000622497	-0.00358267	-0.000757499	-0.000302621	0	-0.00110755	0.00026431	0.000349037	-0.00145536	0.0013357	0.00325845
msp_0308	Clostridium saccharolyticum 2	0.000194883	0.000672561	-0.000233441	0.000494561	-0.000827221	-0.000977993	-0.000850941	-0.00433048	-0.000393486	0.000284863	-0.000322313	0.000373755	0.000258343	8.10198e-05	1.51934e-05	0.00573629	0.000434349	-0.000543723	0.000345186	0	-0.000437731	0	0.000622179	0.000161946	7.90692e-05	0.000634709	0.000210225	0.000309283
msp_0309	unclassified Blautia	-0.000718173	-0.000126984	0	0	-0.000179209	-0.000691064	0.00178713	6.47149e-05	-0.00208363	0	-0.000262913	-0.000334786	5.64029e-05	-0.000359099	-4.62225e-05	0.00514828	0.000382763	6.05457e-05	-3.28731e-05	0	0	0	3.62684e-05	-0.000768774	5.55395e-05	-5.97898e-05	-0.000130028	0
msp_0310	Barnesiella sp. An22	0	0	0	0	0	0	0	0	-2.03877e-05	0	-2.93785e-05	0	0	0	0	0	0	-3.16137e-05	0	0	0	0	0	0	0	0	0	0
msp_0311	unclassified Firmicutes	0	0	0.000116734	0	-0.000285343	0	0	0	0	0.000784327	-9.909e-05	-2.80788e-05	0	0	0	0	0	0	0	0	0	0	0	0	0	6.71437e-05	-7.96163e-05	0
msp_0312	Firmicutes bacterium CAG:110	-0.000298463	-9.72129e-05	-0.000818838	-0.000224732	-0.00338549	-3.19883e-05	0.000447746	0.000516445	0.000239261	-0.00024685	0.00035649	0.000543401	0.000297104	-0.00129046	0.00028347	-0.000729829	-0.000439236	0.00016727	0.000476401	0	2.70337e-05	0	-0.00104324	0.000875272	0.000331501	-0.00197442	-0.000406092	0.000635074
msp_0313	Veillonella parvula	0.000979147	0.0004255	0.000497713	-0.000942811	0.000547214	0.00064806	-0.00542809	0.000281365	0.000816571	-0.000644833	-0.000392361	0.00103319	-0.00038545	0.0178228	-0.000870151	0.000489582	-0.000493642	0.000326137	0.000526461	0.00157198	-0.000415562	0.00273854	-0.000156619	0.00197848	0.00135213	0.00303679	-0.000596162	0.00021291
msp_0314	unclassified Clostridiales	0.000924986	0.000980915	-0.000204022	0.0003217	0.000280384	0	0.000622148	0.00287002	0.000136977	0.000923819	0.000541248	0.00266862	-0.000407641	5.43895e-05	0.000213668	0.000481059	0.000508991	-0.000359856	9.32857e-05	0	0	0.000891204	0.000598975	0.000246773	0.00016581	-0.000207432	0.000613204	-0.000432113
msp_0315	Firmicutes bacterium CAG:145	0.000421509	0.000490376	-0.000516255	-0.00153422	0.000434263	0	-0.000173625	0.000674621	0.000164745	0.00130874	-0.00126453	-0.000242513	-0.000103554	9.1639e-05	0.000523479	0.000375258	0.00122135	0.000199415	0.000493317	-0.000139961	-0.000393854	-0.0005	0.000464223	0.00138017	5.22929e-05	-0.000491552	0.00293465	-0.00321157
msp_0316	unclassified Parabacteroides	-3.20352e-05	0	-0.000120929	0	0	-5.97986e-05	0.000431024	0	0.000130389	0	4.44184e-05	-0.000158561	-0.000158541	9.60395e-05	-0.000111655	0	3.24019e-05	-0.000194941	0	0	8.76149e-05	0	-4.07395e-05	0.00120011	-0.000199332	-0.000192274	-2.27473e-05	0
msp_0317	unclassified Clostridiales	0.0016297	0.00187735	0	0	-0.000566602	0	0	0.000845857	-9.0046e-05	0.00522	-0.000204262	0.00391508	0.00166662	9.57482e-05	0.000299265	0.00184749	0.00206211	0.000277601	0.000179172	0	5.84907e-05	-0.00152083	0.00117418	-6.70455e-05	-0.000111024	0.000434161	0.000181187	0.00067324
msp_0318	Alistipes indistinctus	0.0023197	0.00372689	-0.00197285	0	-0.000544212	-0.000155908	0.000323991	-0.000236205	0.000623875	0.000594673	-0.000845039	-0.000432666	-0.00117977	-0.00111437	-0.00228906	0.000161176	0.0011443	0.00115667	-0.00244672	0	9.47636e-05	0.000458333	-0.000774321	0.00319218	0.0028241	-0.000905948	-0.000656285	0.000684812
msp_0319	unclassified Clostridiales	5.23752e-05	-5.10291e-05	0	0	0	0	0.000485598	0.000401786	7.84489e-05	-4.98184e-05	-0.000683642	9.5071e-05	-0.000233696	-0.000152112	-0.000808866	0.000283576	-5.84563e-05	0.000513987	-0.00030236	0	0	0	-0.000134428	0.000108356	0	0	0.000156361	0.0011312
msp_0320	unclassified Prevotella	-1.08421e-05	0	0	0	0	0	0	0	0	0.000207285	2.6099e-05	0	0.000324132	0	0	0	0	0	0	0	0	0	0	0	0	0	-3.62731e-05	0.000288869
msp_0321	Clostridium sp. CAG:411	0	0	0	0	-5.72406e-05	0	0	0	-2.07586e-05	0	-0.000498332	0	0	0	0	3.23353e-05	0.000216901	0	0	0	0	0	0	0	0	0	0	0
msp_0322	unclassified Ruminococcus	1.21407e-05	0.000491757	0	0	-0.000179877	0	0	0	-0.000108075	0	-0.000217607	-0.000731808	-8.78393e-05	0.000217686	-0.00012031	0.000559173	-5.58349e-05	0.000162473	-0.00064051	0	-0.000432591	0	0	-0.000129866	-0.00035925	9.21776e-05	-7.19791e-05	0
msp_0323	unclassified Clostridium	-7.91044e-05	0	0	0	-0.000108273	0	0	0	-6.10182e-05	0	-0.000685831	-2.60386e-05	0	0	-5.66603e-05	-8.89479e-05	0	0	-3.86003e-05	0	0	0	0	0	-4.20495e-05	0	4.31935e-05	-0.00100867
msp_0324	Faecalibacterium prausnitzii 7	0.00153672	0.00207948	0	0	-0.000607797	-0.00210204	0.00165878	-0.000141118	0.000244242	0	0.000349181	-0.000309489	-0.00093695	-0.0019108	-0.00080596	-0.000836246	-0.000320307	-0.00190057	0.000672684	0	-0.00052786	0	-0.000211399	-0.00136839	0.00197912	-0.000731507	0.000335651	0.000551371
msp_0325	Ruminococcus sp. UNK.MGS-30	-0.000859599	0.00043595	-0.000368997	0	-0.000200803	-0.000181956	0.000397732	-0.000100489	-0.00125989	0	0.00020334	-0.000190871	-0.000364746	0.000411358	-0.000996763	-0.000199053	0.000282009	0.000542973	0.00103957	0.000103078	-0.00226705	-0.000614583	0.000724635	0.000384279	-0.000178443	-0.000663268	0.000342166	0
msp_0326	unclassified Alistipes	2.40288e-05	0	0	0	-0.000328751	-4.83935e-05	0.000459869	-7.35597e-05	-0.000223734	0	-0.000266315	2.82818e-05	0	-0.000150378	-9.37944e-05	3.52276e-05	0	-0.000739374	0	0	0	0	8.41408e-05	-0.000544255	-7.55312e-05	0.000164158	0	0
msp_0327	Bacteroides sp. CAG:545	0	0	0	0	4.22434e-05	0	0	0	0	7.05681e-05	0.000212178	4.36367e-05	6.82729e-05	0	0	-3.10059e-05	-3.50843e-05	0	-5.09543e-05	0.000111845	0	0	-0.000674187	0	0	7.26958e-05	-0.000263847	0
msp_0328	Brachyspira sp. CAG:484	0	2.1656e-05	0	0	-0.00016699	0	0	0	0	0	6.30559e-05	0.000149753	0.000675622	0	0	4.87712e-05	0	0	0	0	0	0	6.45039e-05	0	0	-0.00010635	6.88116e-05	0
msp_0329	Clostridium butyricum	0.000112523	0	0	0	-1.9947e-05	5.35533e-05	0	0	-0.000144812	0	0	-0.000100374	0	-4.55985e-05	4.12308e-05	7.89758e-05	0	0	0	0	0	0	0	-0.000138259	0	0	0	0
msp_0330	Firmicutes bacterium CAG:534	0	0	0	0	0	0	0	0	0	0.000129968	-0.000390078	0	0	0	0	0	2.97449e-05	0	-7.6215e-05	0	0	0	0.000211472	0	0	0	0	0
msp_0331	Oscillibacter sp. KLE 1728	-0.000884235	0.00157268	0.0016617	0.00270501	0.000664512	-0.00648824	0.000957734	-0.000888345	-0.00294197	-0.000556466	0.00175401	0.00221401	0.000779503	-0.00180016	0.00395024	0.00384168	-0.000379693	0.00166564	0.000363268	-0.000643256	-0.000383958	0.00364583	0.000922222	0.000998144	0.00445417	0.0013195	-0.00130585	0.0011589
msp_0332	unclassified Clostridiales	0	0	0	0	0	0	0	0	0	0	-2.46804e-05	0	0	0	0	0	0	0	0	0	0	0	0	0	0	0	0	0
msp_0333	Lactobacillus ruminis	0	0	0	0	3.22387e-05	0	7.62799e-05	0	-0.000131655	0	-0.000340847	-0.000461273	-0.000103564	0	-0.000453679	0	0	-2.66226e-05	0	0	3.45224e-05	0	0	0.000301269	5.28307e-05	4.49387e-05	0	0.000175724
msp_0334	Erysipelotrichaceae bacterium 5_2_54FAA	0.000532486	-7.5987e-05	-0.000806967	0.00100712	0.000649576	-0.000538919	-0.000424634	-0.000132666	0.00324439	0	-0.000155826	-0.000441612	-0.00025112	5.97638e-05	0.000652422	-0.000143055	-0.000872915	-0.000254286	0.000144957	0	0	-0.001225	0.000604611	0.000240518	0	0	0.000169312	0
msp_0335	unclassified Alistipes	0.00209988	0.00323728	0.00017028	0	-0.00139459	6.23113e-05	-0.000177051	-0.000387836	0.000124756	7.34843e-05	-0.00147694	0.000287018	0.00331473	-0.000159263	-0.000161885	0.000440035	-0.00021515	-0.00020782	0.000368299	-0.000253561	0	0	0.000386719	0.000157801	0.000198429	0.000308314	0.000279226	0
msp_0336	Bacteroides fluxus	2.34739e-05	0	0	0	-3.14524e-05	0	0	6.83622e-05	-2.67708e-05	0	-8.76077e-05	-3.50162e-05	0.000835008	-8.24607e-05	0	0	-4.02245e-05	0	0	0	0	0	0	0	0.00115124	8.30589e-05	-0.000142864	0
msp_0337	Eubacterium sp. 38_16	-0.000565834	-0.000552092	-0.00137185	-0.00122713	-0.000435161	-0.00222509	0.00140634	0.000258224	-0.00043804	-0.000575419	0.000490241	-0.000410131	0.000653087	0.000192029	0.00115186	0.00037372	0.00250238	-0.0014124	-0.000751935	0	3.35669e-05	-0.0004375	0.00413769	-0.000737662	-0.000495879	-0.000519333	0.00104224	-0.000684444
msp_0338	Fusobacterium mortiferum	0.00210603	0.00208357	0	0	-7.13901e-05	0.000154971	-0.000154152	0	-0.0005768	0	0	8.09009e-05	3.78591e-05	-0.000500882	-0.000149734	0	0.000160844	0.000236408	0	0	-0.000163596	0	0	0.000588624	-0.000982592	0	0.000433832	0
msp_0339	unclassified Prevotella	0	0	0	0	0	6.86849e-06	0.000116651	0	-0.000174687	0	-9.33207e-05	0	0	0.00108535	6.00445e-05	0	0	0	0	0	-0.00944473	0	0.00027849	-7.51724e-06	0.00166683	0	0	0
msp_0340	Clostridium leptum	0.0021244	0.000748626	-0.000290476	0.000207416	0.00398965	-0.00107583	-0.000187141	-0.00437037	-0.00201503	-0.000137747	0.000663411	-0.00235288	-0.000790556	-0.000205306	0.000758848	0.0012695	-0.00355482	-0.000294117	-0.00102417	-0.00136583	-0.000420644	0.00650208	0.00207317	0.000673569	0.000245796	-0.0014694	0.00160404	0.00213158
msp_0341	Klebsiella michiganensis 2	-0.000135107	4.86873e-05	0	0	-8.52884e-05	-0.000304192	0	0	-0.000179103	0.000431781	-1.89546e-05	-0.000116069	-0.000114254	0.000209494	-0.000401701	0.000706629	7.07484e-05	2.9102e-05	-0.000106217	0	-0.0005761	0	5.43623e-05	0.000217873	-0.000229445	0.00091609	0.00017268	0.000286596
msp_0342	Flavonifractor sp. 2789STDY5834931	0.00400588	0.00110675	0	0.000705128	-0.00137041	-0.000174829	-0.00035837	0.000395795	-0.000443105	-9.5582e-05	0.000292299	0.000617782	0.00102405	0.00021262	0.000364948	-0.00012332	6.4933e-05	0.000414133	0.00375283	0	-0.00164255	0	-0.000356415	0.000975794	-0.00046113	0.000847728	0.00042714	0
msp_0343	Clostridium sp. CAG:413	0	-1.78775e-05	0	0	0	0	7.3939e-05	7.25199e-05	0	0.000657433	-0.0001454	2.51888e-05	0	0	7.2023e-05	0	0	3.34809e-05	7.86743e-05	0	0	0	0	3.26318e-05	0.000233406	0	0	-0.000217439
msp_0344	Anaerotruncus sp. CAG:390	-1.3173e-05	0	0	0	0	0	0	5.09056e-05	0	0	-0.000190917	0	0	0	0	0	0	0	0	0	0	0	-4.02017e-05	0	0	0	0	0.000465983
msp_0345	unclassified Faecalibacterium	-0.000302408	-0.00010654	0	0	0.000217737	-0.000377642	0.00103698	-3.71448e-05	-0.000500918	0	-0.00436592	-0.000215613	0.00255107	0.000576198	-0.000444207	7.58073e-05	0.000131194	-0.00121265	9.3693e-05	0	-0.000850626	0	-0.000295317	-0.000267562	0.00160028	0	0	0
msp_0346	Clostridium sp. CAG:43	0.00112216	0.000452087	-0.0020514	-0.00632371	-0.00103047	-0.00453947	0.000630561	-0.0010986	-0.00153618	-0.000635943	0.00303797	0.00109362	0.00083721	-0.00228538	-0.00177631	0.00275565	-0.00156487	0.000905193	-0.000704928	0.00156331	-0.00107728	0.00212986	-0.00273131	-0.00108701	0.0015534	-0.00713739	-0.00359943	0.0013073
msp_0347	Clostridium paraputrificum	-0.000304543	-4.79766e-05	7.32327e-05	0.000306268	0.000135178	0.000314638	0	0	-9.72752e-05	0.000262275	0.000157281	0.000266125	9.89981e-05	0.000650611	0.00360027	0.000750762	0.000189521	0.000290698	-0.000217622	0	0	0.0015	7.71069e-05	0.000184507	0	0	-0.000132314	-0.000332116
msp_0348	unclassified Firmicutes	-4.88496e-05	-1.81016e-05	-0.000255732	0	-0.00087402	-4.45162e-05	0	-0.00106967	3.82794e-05	0.000126369	0.000159872	-0.000599021	0.000284234	2.55011e-05	5.8763e-05	-4.9161e-05	-0.000150945	-0.000380382	-0.00024274	0	0	0	-6.07379e-05	-2.43591e-05	0	0.000821454	4.76152e-05	-0.000214667
msp_0349	Bacteroides sp. An19	0	0	0	0	0	0	0	0	0	0.000138047	-9.34271e-05	-0.000133443	-3.93981e-05	0	0	0	0	0	0	0	0	0	0	0	0	0	0	0
msp_0350	Fournierella massiliensis	0.000303579	-5.72494e-05	0	0	-4.46275e-05	4.71599e-05	0	0	-7.29793e-05	8.92535e-05	0	3.89408e-05	3.59114e-05	-0.000105883	0	0.000256194	0	0	0	0	0	0	0.000290567	8.33241e-05	0	0.000366548	0	0
msp_0351	unclassified Bacteroides	2.84885e-05	0	0	0	0	0	0	0	-0.000130275	0	1.81687e-05	-2.9626e-05	3.28393e-05	0	0	0	0	0	0	0	0	0	-9.50493e-05	0	0	0	0	0
msp_0352	Oscillibacter sp. CAG:241	-0.000183414	9.66541e-05	0	0	0.000334952	0	0.000189678	0.000345859	0	0.000479697	0.000349521	-0.000177227	-0.000340519	-1.97714e-05	-0.000125436	0.00109418	0.00181372	5.42848e-05	-0.000130089	0	0	0	0.000360157	-3.33636e-05	0	-0.00058432	-0.000484155	0.000896081
msp_0353	unclassified	-5.81403e-05	0.000130282	-0.000260714	-0.000235704	-0.00463699	0	-7.81651e-05	0.00165682	-0.000142913	-0.000718335	0.0005829	0.000362717	-8.00823e-05	-0.000278903	-0.000193628	-9.71197e-05	9.87601e-05	-0.000361716	-0.000719097	0	0.000333403	-0.000729167	-0.00121772	0.000149411	0.00076755	0.00107906	-0.00101654	-0.00117974
msp_0354	unclassified Firmicutes	0	0	-0.000130344	0	-0.00015919	0	0	5.07076e-05	0	7.35522e-05	-0.000463359	0.000192863	0.000121489	0	0	0.000277891	0.000308521	0	-0.000265092	0	0	0	0	0	0	0	0	0.000293153
msp_0355	unclassified Bacteroides	0	0	0	0	0	0	0	0	0	0	0	0	-4.77715e-05	4.18449e-05	0	0	0	0	0.000116674	0	0	0	0	0	0	0	-3.30393e-05	0
msp_0356	unclassified Clostridiales	0.00308855	0.0019732	-0.00101834	0.000321678	-0.00212586	-0.00296119	-0.0014966	-0.000329652	0.000638365	-0.000805601	0.000807272	0.000613542	-0.000529526	-0.00181326	0.00355233	0.000445724	-0.000561089	0.000711844	0.00310345	-0.000311995	0.00202224	-0.0006875	0.00143193	0.0016348	0.000541164	-0.000685216	0.00095144	0.000357694
msp_0357	Clostridium sp. CAG:169	0.000460393	0.00087306	-0.00200879	0	-0.000417681	0	0.000447266	-0.000171241	-0.000108192	0.000528101	0.000768906	-0.000155973	0.000618802	-9.17235e-05	0.000724727	-0.0003542	-0.000713452	0.000283595	-0.000432899	-6.01504e-05	7.26587e-05	0	-0.000559363	0.000417818	-0.00017486	-0.00149542	0.00147822	0.00191992
msp_0358	unclassified Eubacterium	0	0	0	0	-3.53914e-05	0	0	0	0	0	0	0	0	0	0	0	0	0	0	0	0	0	0	0	0	0	0	0
msp_0359	Mitsuokella jalaludinii	0.000144108	0.000330179	0	0	0	0	0	0	0.000132648	-0.000120927	0.000145219	0.000155617	0.000288427	0	0.00011735	-5.58797e-05	8.01811e-05	-5.68754e-05	0	0	0	0	-4.38752e-05	-4.88478e-05	0.000126602	0.000230772	2.89639e-05	0
msp_0360	Clostridium asparagiforme == lavalense	0.000684219	0.00101288	0	0	0.000862571	-0.000547103	0.00120905	0.000776774	-0.000823293	-0.000200174	-0.000355144	0.00025567	0.000510756	0.000567249	0.00266392	0.000499705	0.000757383	-0.000628949	0.000374344	-0.00022148	-0.000417195	-0.0039375	0.00204556	0.00252324	-0.000292896	0.000637633	-0.000679065	-0.0018002
msp_0361	Firmicutes bacterium CAG:170	-0.000167912	-6.65175e-05	0.000263941	0	0.000342359	0	0.00047975	0.000201039	0.000101824	8.99829e-05	0.000500152	-0.000205371	-0.000215882	-0.00010395	-0.000345788	-0.000162607	0.000305398	0.000192441	-0.000151808	0	0.00015429	0	0	0.000120165	0	-0.000126648	6.00477e-05	0.000603103
msp_0362	Clostridium saudiense	0.000449821	0.000869919	0.000299874	0	-0.000271027	-4.25254e-05	0	-0.00063536	-0.00123143	0.000774554	-0.000740501	0.000301517	0.000618719	0.000428483	0.0012985	0.00049771	-0.000671173	-0.00131478	0.000383989	0	7.58859e-05	-0.00467911	-0.0017344	0.000527095	0	-9.57607e-05	0.000493005	0
msp_0363	unclassified Bacteroides	1.54193e-05	0	0	0	0	0	0	0	-0.000108557	0	-1.94358e-05	-9.97089e-05	0	0	0	0	0	0.000404814	0	0	0	0	0	6.71629e-05	0.000107216	-5.16431e-05	0.000138782	0
msp_0364	Intestinimonas butyriciproducens	-0.000841609	-0.000358722	-0.00103769	0	0.000563482	-0.0014715	-0.000862096	0.00118385	-0.00228495	0.000220386	0.001455	0.00203635	0.000631714	0.000371521	0.00191783	0.00115082	-0.000890518	0.000311156	0.000603087	0	-0.00114187	0.00252222	0.00210909	0.00282633	0.00184599	-0.00295908	0.00231535	-0.00135556
msp_0365	unclassified Lachnospiraceae	0.00102772	0.000799475	0	0	3.65417e-05	0	0	7.16487e-05	0.000256009	-8.74598e-05	1.48292e-05	7.08733e-05	-7.77452e-05	0	0	6.32708e-05	0	-6.08861e-05	0	0	0	0.00241944	0.000159532	2.70238e-05	0	-0.000222631	-0.000242776	0
msp_0366	unclassified Caecibacter	-0.000152669	0.000582296	0	0	3.18794e-05	0	-7.49039e-05	0	0.000319496	0	0	-7.05343e-05	0	1.5748e-05	4.88817e-05	0	0	-0.000212244	0	0	0	0	0	-9.33896e-05	0.000987419	0	-3.61474e-05	0
msp_0367	Ruminococcus champanellensis	-1.93107e-05	2.28789e-05	0	0	-0.000389221	0	0	0	0	0.000117533	-0.00144065	-0.000352788	-0.0003349	0	-4.00672e-05	-8.4605e-05	-4.27361e-05	0	0	0	-4.46322e-05	0	0	0	0	0	-2.47812e-05	-0.000120765
msp_0368c	Aeromonas veronii	5.72032e-05	7.28849e-05	0	0	2.69831e-05	-3.34504e-05	0	0	0	0	0	0	0	-0.000139148	0	0	0	0	0	0	-0.00109086	0	0	0	0	0	0	0
msp_0369	unclassified	0.000177183	0.000160569	0	0	-3.93851e-05	0	0	0.00105012	0.000261589	0.000986058	-6.26422e-05	-0.000234715	0.000479835	5.40405e-05	-0.000311488	0.000183567	0	4.31506e-05	0	0	0.00027275	0	-7.55235e-05	-0.000154497	-0.000111555	0	0.00298581	0.000899529
msp_0370	Anaeromassilibacillus sp. Marseille-P3371	-0.000347454	0.000233802	0	0	-0.000421406	0	0	-5.37722e-05	0	0.000815064	0.000230241	-0.000142592	0.000604036	0	0	-7.45779e-05	0.000254917	0	-9.51231e-05	0.000166798	0	0	8.80407e-05	1.79428e-05	0	-0.00042523	0.00610664	0
msp_0371	unclassified Roseburia	0	0	0	0	0	0	0	0.000140696	0	0	-4.50638e-05	0	0	0	0	0	0	0	0	0	0	0	0	0	0	0	0	-0.000122222
msp_0372	unclassified	2.96377e-05	-1.40666e-05	-0.000221435	0	0	0	0.000274834	0	-1.38402e-05	8.42259e-05	0	0	-0.000224082	-1.42614e-05	-1.68728e-05	9.03545e-05	-3.78137e-05	-9.44458e-05	-5.49086e-05	0	0	0	0.000862555	0.0002697	0	0	0	0
msp_0373	Clostridium sp. 2789STDY5608884	0.000318076	0.000494518	0.000750371	0	-0.00750566	-0.000220395	0.00105942	-0.000193	0.000903766	0.00120902	0.000904782	-0.000378241	0.000591877	-0.000118781	-0.000365196	-0.000230829	-0.000175365	-0.000209287	0.000579976	-8.5947e-05	-0.00013238	0	-0.00338149	-0.000245545	0.000197283	-0.000165325	-0.000339384	-0.000391749
msp_0374	Gemmiger formicilis	-0.00114252	0.000786575	-0.00266443	-0.000769231	0.00165907	-0.00351343	0.00060799	-0.000688041	0.00128498	-0.000631817	0.000809588	0.000480349	0.000862788	0.000429469	0.000562309	-0.0010023	-0.000814937	-0.00394283	0.00325092	0.000196932	0.00233982	-0.0005	-0.0010683	-0.00249716	0.0018768	0.00100464	-0.0010721	-0.00060448
msp_0375	Rhodospirillum sp. UNK.MGS-17	0.000365046	0.000287666	-0.000267864	0.000244658	-0.00161661	0	0.00086645	0.000503779	0.000125743	0	0.000344206	-0.00105124	-0.00137108	9.88907e-05	0.000192159	-0.000328191	0.000253253	0.000108266	-0.000263729	0.000382415	-0.00103161	0	0.00039669	0.000164298	-0.000555124	-0.00165066	-0.00037198	-0.000184929
msp_0376	Bacteroides pectinophilus	0	0	0	0	-0.00193551	0	0	7.8142e-05	-2.91586e-05	0	-0.00134908	-0.000175839	0.000176782	2.46569e-05	3.23653e-05	-8.30847e-05	0	0	-0.000140608	0	0	0	0.000125876	1.7634e-05	0	0	0.000448402	0
msp_0377	Bacteroides barnesiae	0	4.39482e-05	0	0	6.42851e-05	0	0	0	0	0	0	0	8.15874e-05	0	0	0	0	0	0	0	0	0	0	0	0	0	0	0
msp_0378	Eubacterium sp. CAG:156	-0.000393895	-0.000376357	-0.000628352	0	-0.000514462	-0.00123393	0.00113755	0.00325191	-0.000372637	-6.75126e-05	-0.000373123	-0.00145681	0.00161627	-0.0013462	0.000596048	0.000448956	0.00108755	-0.00313972	0.00260262	0	0.000431368	0	-0.000150833	0.000653782	0.000311214	0	0.000533469	-0.00110795
msp_0379	Merdimonas faecis	0.000314168	-0.000157145	0	0	0	-9.98937e-05	0	0.00110279	0.00013263	0.000466504	-0.000841856	8.21672e-05	5.15213e-05	2.90091e-05	-0.00015536	0.00028166	-0.000812545	-0.00028102	0.0020622	-6.05681e-05	0	0	5.18188e-05	-5.71991e-05	0	-0.000865761	-0.000889786	0
msp_0380	Streptococcus salivarius	-0.00466723	-0.00120399	-0.00182895	-0.000458974	-0.00155796	-0.00223653	-0.00572699	0.000745027	0.00307099	-0.00036765	-0.0014178	-0.00902913	-0.00194686	0.012596	0.00104105	-0.00116528	-0.00169027	-0.00114665	-0.00405027	-0.00327204	-0.000499863	0.0085	-0.00070528	-0.00323358	-0.000362956	-0.00344517	-0.00216685	0.000373692
msp_0381	Alistipes senegalensis	-0.000203483	0.000460549	0.000682939	-0.000292854	-0.0031066	-0.000135919	-0.00574111	-0.00079058	-0.000507094	0.000280636	-0.000682386	-0.000148883	0.000950152	-0.000808834	0.000368701	-9.47531e-05	-0.000154814	-0.000225036	0.00093389	0.00105465	0.000426639	0	-0.000564163	0.000541308	0.00148161	0.00157973	0.00392356	-0.000720899
msp_0382	unclassified Lachnospiraceae	0	0.000251958	0	0.000476852	0	0	0	-0.000294836	0	0	-0.000225713	0.000218682	0.000108232	0	0	0.000478053	0.000124727	-7.20267e-05	8.40892e-05	0.0031723	0	0.00336806	-3.34736e-05	0	0	0.000160713	6.3349e-05	0.000164444
msp_0383	Dialister succinatiphilus	8.91375e-05	0.000185953	0	0	0	0	0	-0.000100905	3.8403e-05	0	-4.6374e-05	7.62475e-05	-3.40874e-05	3.71328e-05	-0.000134138	0	-6.11613e-05	2.29763e-05	4.68082e-05	0	0	0	0	0.000135052	0.000518717	1.61806e-05	9.25355e-05	0.000157778
msp_0384	unclassified Firmicutes	5.78849e-05	0.000197612	0	0	0.000730155	0	0	0	-0.000309751	0	-5.76915e-05	5.46641e-05	0	-3.56793e-05	0.000127731	0	-2.69863e-05	0.000177311	0	0	-0.00027028	0	-0.000491376	0.000129606	0.000134358	0	0	0
msp_0385	Ruminococcaceae bacterium D16	-0.000227727	0.00667211	0.000249817	0	-0.000290104	-6.93283e-05	-9.37813e-05	-0.000316332	-0.000445132	0.000602542	-0.000515119	-0.000172258	5.32765e-05	0.000559279	0.000270552	0.00163091	-0.000432023	0.000172583	-0.000238458	0	3.47746e-05	0.00255417	-0.000500874	-0.000230693	-6.90393e-05	0.0017416	-0.000167474	0
msp_0386	unclassified	-0.000122964	-0.000128083	0.000225324	-0.000192308	-0.000262705	-3.05615e-05	0.000723113	0	-0.000539548	0.000102461	0.0001625	6.49543e-05	0.00164269	-0.000253341	-0.000451966	0	0.000130639	0.000166333	0	0	-0.00287724	0	-0.000106889	-0.00038125	-0.000405244	-0.00112673	-0.000872573	0
msp_0387	Firmicutes bacterium CAG:882	0	-1.97552e-05	0	0	-4.72987e-05	0	0	0	-5.44949e-05	0	0	0	0	-0.000225104	-0.000123923	0	0	-0.000156472	0	0	4.14645e-05	0	0	2.97102e-05	0	-6.2227e-05	0	0
msp_0388	Faecalibacterium prausnitzii 3 ( L2-6)	-0.0012909	-0.00121391	-0.00082415	0.000433761	-0.00286311	-0.00610164	-0.00413727	-0.00131756	-0.00177958	-0.00222692	-0.000587407	-0.00098769	0.000343878	0.00106871	0.000949019	-0.00102215	0.00184696	-0.00423346	-0.000827409	-0.00156272	-0.0010402	-0.00472917	-0.00172496	-0.00436837	-0.00136645	-0.000739993	0.00101535	-0.000802558
msp_0389	Faecalibacterium prausnitzii 4 (cf. KLE1255)	-0.0015896	-0.000402177	0.00118176	0.000461538	0.000977702	-0.0153871	-0.0045139	-0.000501363	-0.00627062	-0.00258138	-0.000992011	-0.000578366	-0.000902988	-0.00275866	-0.00223222	-0.00085135	0.000574298	-0.00660563	0.000847636	-0.00219945	0.000829955	-0.00170486	-0.00382173	-0.00363619	0.000980318	0.00109979	-0.00199979	0.000713704
msp_0390	Bacteroides sp. CAG:1076	-2.85439e-05	0	0	0	0	0	0	0	0	0	0	2.47998e-05	0	0	4.26201e-05	0	-4.22995e-05	0	0	0	-0.000798319	0	0	-2.32452e-05	-0.00164397	0	4.15199e-05	0
msp_0391	Oscillibacter sp. CAG:155	1.48813e-05	0	0	0	0	0	0.000362806	-5.83941e-05	-0.000319276	0.00128714	0.000173169	0.000335761	0.000181539	0	-8.12288e-05	0.000680599	0.000116254	-4.95118e-05	0	0.00039525	0	0	0	0.00019004	-0.000115725	-0.000125121	-0.000305569	0.000236444
msp_0392	Firmicutes bacterium CAG:238	2.51136e-05	0.000100718	-0.000273707	0	8.32672e-05	0	0	0.000213641	0	0.000447261	0.000600111	-0.000504291	-0.000716825	-3.74677e-05	4.96325e-05	0	0.000157745	-4.29285e-05	6.74396e-05	0	0	0	0	2.02921e-05	-7.25208e-05	0	0.000103619	0
msp_0393	unclassified Ruminiclostridium	0	0	0	0	-4.2056e-05	0	0	7.55048e-05	0	0	-0.000722693	-0.000110804	-3.35499e-05	0	0	0	0	0	6.74808e-05	0	0	0	0	0	0	0	0	0
msp_0394	unclassified Parabacteroides	0	0	0.00023155	0	0	4.07966e-05	0	0	-1.05984e-05	0	-4.3704e-05	0	3.57596e-05	0	0	0	0	0	0	0	0	0	0	0	0	0	0	0
msp_0395	Brachyspira sp. CAG:700	0.000157519	0	0	0	0	0	0	0	0	0	4.72373e-05	-3.06581e-05	-3.58177e-05	1.6709e-05	0	0	0	0	0	0	0	0	0	-9.66021e-06	0	0	0	0
msp_0396	Adlercreutzia equolifaciens	-0.000988275	0.000582594	-0.00200138	-0.00057014	-0.00168432	-0.000907301	-0.000634792	0.00333241	0.000611797	-0.000392084	-0.000394184	0.00119344	0.00154549	-0.0048865	-0.00103689	-0.00134226	0.000741249	-0.000688114	-0.00165806	0.00277094	-0.000343675	0	-0.000942523	0.000404604	0.00111307	0.000531433	-0.00147253	-0.00053653
msp_0397	unclassified Clostridiales	1.47601e-05	0	-0.000419272	0	-0.000489743	0	0.00114942	-0.000606244	-4.10547e-05	-9.29222e-05	-0.000630589	-0.000919037	0.000280612	7.09648e-05	0.000404459	0.000176783	-0.000168919	-0.000189824	-0.000161185	0	0	0	-0.00021645	4.3435e-05	0	0.000122073	0.000356818	-0.0003647
msp_0398	unclassified	5.44568e-05	0.000245235	-0.00248055	-0.00075641	-0.00141845	0	-0.000193123	0.0015262	0.000110651	0.0022708	-0.000336623	0.000387597	-0.000938041	8.28389e-05	-0.000223844	0.0022516	0.000382697	0.000387448	-0.000638799	0	-6.5295e-05	0	-0.0002504	0.000142522	-0.000368295	-0.000255009	0.000659442	-0.000715238
msp_0399	Faecalibacterium prausnitzii 5	5.0958e-05	-1.61255e-05	-0.00101829	0.000264957	0	0	0	0.000257211	-5.239e-05	-0.000994725	-9.50891e-05	-0.000713242	-0.000619989	2.60494e-05	3.61617e-05	0.000771164	0	3.49281e-05	0.000147852	0	0	0	-0.000118124	1.15733e-05	0	-0.000121122	0.000780763	0.00116963
msp_0400	unclassified Firmicutes	0	0.000179598	0	0	0	0	0	0	0	0	1.2614e-05	2.38985e-05	0.000111495	0	0	0	3.51849e-05	0	0	0	0	0	-0.000140527	1.90456e-05	0	4.80159e-05	0	0
msp_0401	unclassified	-1.19777e-05	3.43645e-05	-0.000148882	0	0	0	0	-0.000130921	1.24825e-05	0.000339479	8.56126e-05	0.000134111	-0.000124524	0	1.61079e-05	-2.70287e-05	0.000145987	-9.80246e-05	-0.000192402	0	0	0	9.45238e-05	-8.77322e-06	0	0	-0.000119498	0
msp_0402	unclassified Lachnospiraceae	0.000147862	0.000105526	0	0	0.000162177	2.844e-05	0.000258401	0	4.79823e-05	-0.00011984	7.40785e-05	-4.38089e-05	0	-1.15643e-05	0	0.000119629	-0.000188583	9.3247e-05	-4.66818e-05	0	-0.000421938	0.00127083	-0.000228427	9.0354e-05	0	-4.8555e-05	3.16352e-05	0
msp_0403	Enterococcus faecium	-0.000224052	0.000150133	0.000105421	0	-0.000294987	8.38357e-05	0	0	0.000166865	0	0	-0.00182865	-0.00074156	-0.000336521	0.000169019	0.000637204	-0.000170881	-4.42163e-05	0.00018818	0.000267648	0	0	0	0.000773792	0	-0.00101187	0.000911477	0
msp_0404	unclassified Firmicutes	-0.000246218	-8.56881e-05	-0.00064581	0	-0.00103138	0	0.000247589	-0.000152654	0.000199372	-0.000133805	0.000308874	-0.000841764	-0.000374986	-0.000144937	0.000408486	0.000557548	0.000378771	2.33009e-05	0.000492208	0	5.63114e-05	0	-0.000153697	0.000189587	0.000902109	-0.000128831	-0.000208871	-0.00022211
msp_0405	Ruminococcus sp. CAG:403	0	0	0	-0.000214467	3.54134e-05	0	0	0	3.43036e-05	5.9258e-05	0.000114748	-0.000130406	0.000130923	2.331e-05	-9.73858e-05	0.0010148	0.000131656	0.000108383	0	0	0	0.000956944	5.72724e-05	5.88834e-05	0	-5.20413e-05	-7.91526e-05	0.000150427
msp_0406	unclassified Megasphaera	-1.92796e-05	0	0	0	-3.89115e-05	5.82988e-05	-0.000363134	0	-0.00074627	0	-0.000112575	0	0	-0.000182084	-0.000135694	0	0	-0.000367199	0	0	3.38021e-05	0	4.265e-05	0.000727805	0	0	0	0
msp_0407	unclassified Gemmiger	4.97095e-05	0.000351554	-0.000693136	0	-0.000417108	-0.000188684	0	-0.000723112	-5.37364e-05	-0.000148707	0.000373365	0.000486389	-0.000618227	-0.000159797	-0.000342393	0.000245503	0.00101149	-6.58026e-05	-0.000353954	-0.000356374	0	0	-0.00033877	-0.000355971	0.000626188	0.00030142	0.00170909	0.000420444
msp_0408	Lactobacillus mucosae	-0.000146886	0.000300353	-0.000216635	0	7.10084e-06	-0.000194418	0	0	0.00279606	0	1.89084e-05	-0.000203518	0	0.00484648	0.0003449	7.70184e-05	0.0001609	0.000682425	0	0	0	0	0	0.00223457	0.000159985	0	3.72859e-05	0.000488154
msp_0409	Pyramidobacter piscolens	-4.92071e-05	0.000404305	0	0	6.25924e-05	0	0.000492364	0	-0.000190892	0	0	-6.1376e-05	-5.77877e-05	0.000310742	-0.000269868	0	0	-0.00045085	4.28533e-05	0	-0.000462784	0	0	0.000287291	-0.000466975	0.000329769	-0.000117913	0
msp_0410	unclassified Anaeromassilibacillus	0	0.000131954	0	0	-0.00105469	0	0	0	-8.88605e-06	0.000372798	0.000135187	0	9.23469e-05	0	0	0	0.000244116	0.000152863	0	0	0	0	4.54448e-05	2.81933e-05	0	0.000518876	7.02081e-05	0.000139074
msp_0411	unclassified Akkermansia	0	0	0	0	0	0	0	0	0	4.17854e-05	1.44373e-05	-0.000245538	-3.23417e-05	0	0	-3.78869e-05	0	0	0	0	0	0.00140278	-0.00107879	0	0	7.53641e-05	0	0
msp_0412	Bacteroides sp. CAG:144	0.000658874	0.000738977	0.000328788	0.00173321	0	0	0	-4.60304e-05	0	0.000850954	-0.000650093	0.000535593	0.000172374	0	5.03329e-05	0.000162113	0.000649581	0	0.000709715	0	0	0	0	0	0	-6.5235e-05	-0.000402332	0
msp_0413	unclassified Phascolarctobacterium	3.45907e-05	0.000191564	-0.000119795	0	0	4.03388e-05	0	0	-8.58792e-05	0	0	0	0	0	-2.01328e-05	0	0	-0.000120411	0.000138298	0	0	0	0	0.000310239	0	0	-2.87852e-05	0
msp_0414	Duodenibacillus massiliensis	-1.0545e-05	0	0.000276759	0	8.88134e-05	0	0.000564025	0	0	-9.53842e-05	-0.000623625	3.55671e-05	-0.000278	0	-2.52823e-05	0.000840905	0.000787571	0	7.23306e-05	0	0	0	-6.70482e-05	-7.43587e-06	0	9.6113e-05	4.50427e-05	0
msp_0415	unclassified Bacteroidales	0	0	0	0	2.84564e-05	0	0	0	0	0	0	0	0	0	0	0	0	0	0	0	0	0	3.07331e-05	0	0	0	0	0
msp_0416	Bacteroides sp. CAG:709	-1.41364e-05	7.51957e-05	0	0	-0.00014772	0	0	-0.000549173	-2.61439e-05	-0.000100408	0.000149717	0	-4.39048e-05	0	0	-3.82942e-05	9.01286e-05	0	-0.000325481	0	0	0	-0.00011138	0	0	8.74892e-05	0	0
msp_0417	unclassified Alistipes	7.32919e-05	0	0	0	-3.63985e-05	0	0	-6.27084e-05	0	0	-0.000118748	5.13396e-05	-3.63754e-05	0	0	0.00286923	0.000125625	0	-0.000131658	0	0	0	-0.000321982	0	0	0	-4.0342e-05	0
msp_0418	unclassified Gemmiger	0.00103327	-0.000295804	-0.002245	-0.000447293	-0.000304537	-0.000229122	0.00158985	-0.00026046	0.000136229	0	0.00108293	-0.000437058	0.00128741	0.000498467	0.000402782	6.85532e-05	0.000445469	0.000201626	-0.000225979	0	-0.00026093	0	-0.0004791	-0.000413613	0.000395625	-0.000200032	-0.000323705	0
msp_0419	Bifidobacterium bifidum	-0.000529679	0.000336356	0	0.000493395	0	8.112e-05	-6.15741e-05	0.000146733	-0.000211512	-0.000357345	-0.000879832	0.00017902	0.000227723	0.000168807	-0.00270002	-0.000310347	-0.000770176	-0.000780787	0.000309021	0	0.000132193	0.00075	-0.000357968	-0.000254812	0.000625175	0.000479397	-0.000843733	-0.000260639
msp_0420	unclassified Clostridiales	0	0	0	0	4.01428e-05	0	0	0	0	0	0	0	0	0	0	0	0	0	0	0	-9.08471e-05	0	0	0	0	0	0	0
msp_0421	unclassified	0.000102743	-1.66499e-05	0	0	0	0	0	6.43014e-05	0	0	-0.000394717	4.88064e-05	0	0	0	8.49605e-05	2.86706e-05	0	8.49718e-05	0	0	0	-6.83972e-05	1.1146e-05	0	0.000362393	0	0
msp_0422	Romboutsia timonensis	-0.00120284	0.00058418	0.000571809	-0.00146724	-0.000613687	-0.00350194	-0.000744023	0.00153835	-0.00243596	0.000113157	-0.000417022	-0.00986344	-0.00305413	-0.00299915	-0.00115158	-0.000728653	-0.00100906	-0.000864397	-0.000586563	0	0.000599677	0.00172917	-0.00115334	-0.0114797	-0.000480179	-0.0028993	0.00127784	0
msp_0423	unclassified Oscillibacter	8.7749e-05	0.000130625	0	0	-5.23158e-05	0	0	0.000322216	8.78533e-06	0	-0.000264205	-0.00011211	0.000510969	-1.49387e-05	-1.63796e-05	0.00055149	0.000140401	0	-0.000440555	0	0	0	0.000248181	2.67441e-05	0.000115445	0.000127129	-0.000226387	0
msp_0424	unclassified Clostridiales	0.000117876	-0.000149699	-0.000471096	0	-0.0012075	0	0.000702304	0.000304401	8.40559e-05	0	-0.000550886	0.000215663	-0.000617214	-0.000125549	0.000346426	0.000618199	0.00022947	-0.000278645	0.000606179	0	0	0	0.000140375	-6.91251e-05	0.000134043	-0.000212289	0.000391203	0.00115114
msp_0425	unclassified Firmicutes	0.000601858	-0.000292384	0	0	-0.000268244	0	-0.00126708	-9.57021e-05	0.000183117	-0.000295915	0.000849769	-0.000363057	-0.000636966	-9.37794e-05	-0.000102687	-0.000248012	-0.000264978	0.000154297	0.000208088	-6.11927e-05	0.000555109	-0.00268264	-0.000222549	-0.000106292	0.00101743	-0.000333651	-7.43133e-05	0
msp_0426	Dialister sp. CAG:486	-6.69856e-05	8.42809e-05	0	0	0	7.53273e-05	0	0.000360424	-3.00007e-05	0.000147771	4.59386e-05	0.000209389	0	0	-8.07156e-05	0.00733763	-3.83689e-05	-9.85493e-05	0.000391419	0	2.75673e-05	0	-8.43382e-05	0	0	0	0.0001112	0.000207111
msp_0427	Eubacterium sp. CAG:786	0	0	0	0	0	0	0.000374372	0	0	0	-0.000107248	0	-3.90527e-05	0	0	0	0	0	0	0	0	0	-3.58437e-05	0	0	0	0	0
msp_0428	Bacteroidales bacterium H5	0	0	0	0	0	0	0	0	0	0	0	0	0	0	0	0	0	0	0	0	0	0	0	0	0	0	0	0
msp_0429	Alistipes timonensis	0.000158512	0	-0.000147168	0	-0.000194687	-0.000156017	0	-0.000215597	-3.47819e-05	0.000417571	8.5223e-05	-8.12067e-05	0.000154989	0	1.58522e-05	-4.51181e-05	-3.20069e-05	0.000101042	0	0	0	0	-0.00125978	8.81548e-05	0	0	0.000481231	0
msp_0430	unclassified	6.3768e-05	0.000161009	-0.00108468	0	-0.000300753	-5.96017e-05	0	0.000232803	-7.11428e-05	-0.000221977	-0.00202284	-0.000207921	0.000521073	0	0.00019152	0.000327751	0.000251097	-8.1969e-05	-0.000490507	-7.39348e-05	-3.58705e-05	-0.000364583	-0.000819856	3.72058e-05	0.000242111	-0.000475393	0.000456203	0
msp_0431	Eubacterium sp. CAG:274	0.000254002	0.000578186	9.45539e-05	0	-0.000170244	-0.000615969	0.000221841	0	-0.00133359	-0.000346175	0.000209947	-0.000447477	0.000663753	-0.00044908	0.000504902	-0.000272794	-0.000329754	0.000347792	0.000182493	0	0.000204922	0	-0.00060786	-0.000621315	0.000265472	0	0.000185528	0
msp_0432	unclassified	8.77341e-05	0	-0.000769137	-0.000535613	-0.000601523	0	0.00160446	0.000516703	-7.53923e-05	-0.000435451	-0.00053315	0.00078632	0.00034214	-7.26971e-05	0.00019977	-8.03364e-05	-6.64418e-05	4.28218e-05	0.00128694	-0.00102283	-0.000100674	0.000957176	-0.00227451	3.05003e-05	-0.000316289	-0.000910187	0.000214824	-0.000576932
msp_0433	unclassified Firmicutes	9.94966e-06	0	0.000112872	0	-0.000933956	0	-0.000239929	0	-0.000140269	0	-0.000349148	9.56001e-05	0.000197782	4.88785e-05	0.000255806	2.73496e-05	-8.0624e-05	-0.000159191	-6.79997e-05	0	-0.000394635	0	0.000113752	-0.000157815	-0.000290991	0	0	0
msp_0434	unclassified Clostridiales	0	0	0	0	0	0	0	0	0	5.34569e-05	-0.000106294	0	0	0	0	8.08466e-05	0	0	0	0	0	0	0	0	0	0	0	0
msp_0435	unclassified Oscillibacter	0.000484462	0.00115006	0.000107179	0.000350039	0	-0.000230883	0	0.00118785	0	0.000677549	0.000187936	0.00103054	0.000417409	0	0	0.000894957	-0.000133396	0.000164215	0.000139195	0	0	0.00175208	0.000208082	-2.81055e-05	0	-0.00028501	0.000607065	0.000343889
msp_0436	Blautia obeum	0.00155992	0.00101116	0.000531551	-0.000811869	-0.00211165	-0.0118067	0.00103925	0.003066	0.0010583	0.000329869	-0.00149511	-0.000634484	0.000664759	-0.00128017	0.00109751	-0.000294778	-0.00165474	-0.00133743	-0.0014698	-0.000581094	0.0028406	0	-0.00300899	-0.00151098	0.000896702	-0.00506462	-0.000791427	-0.00177112
msp_0437c	Actinomyces oris	0.000499314	-0.000300116	0	0	-0.000128905	-0.00018954	0	0.00037951	0.000620398	0.000509524	0	-0.0064723	-0.000226358	0.000255289	0.0012227	-0.00146628	-0.00186075	-8.17694e-05	0.000284219	-0.000124185	0	0	0.000123282	-0.000108929	0	-0.00344494	0.000986293	0.000285926
msp_0438	unclassified Bacteroides	2.291e-05	0	0	0	0	0	0	0	0	0	0	0	6.02054e-05	0	0	-3.13072e-05	6.89819e-05	0	0	0	0	0	-5.28387e-05	0.000128475	-3.93748e-05	0.000160286	0	0
msp_0439	unclassified Alistipes	-0.000189778	-6.8958e-05	0	0	-0.0005112	-4.61087e-05	9.03111e-05	0.00012943	-0.00020647	0.000320357	0.000102434	3.35766e-05	0.000292869	-0.000151776	-9.57596e-05	5.87455e-05	3.12086e-05	-5.4337e-05	-8.92314e-05	0	0	0	0.000220863	-0.000268838	5.59712e-05	0	-6.41056e-05	0.000158222
msp_0440	unclassified Eubacterium	-2.59907e-05	0	0.000218398	-0.000638462	-0.000520753	0	0	0.000179873	0	-0.00020915	-0.000318625	-0.000622321	-0.000196922	0	0	0.000287663	-0.00043585	0	0.00164672	-7.3183e-05	0	-0.000583333	0.000481578	0	0	0.000302932	0.000368031	0
msp_0441	unclassified Roseburia	1.40485e-05	0	-0.000121201	0	-8.73668e-05	-0.000399248	-0.000285294	0	0.0043153	0	1.20473e-05	-0.00010082	0.00135452	-0.000174349	0.000273794	-3.22751e-05	-4.62373e-05	0.000366719	0	0	-8.26603e-05	0	0	0.000278523	0.000167042	0	0	0
msp_0442	unclassified Flavonifractor	0.000803168	-5.99145e-05	-0.00248364	-0.000653312	-0.00233055	0	0.000540864	0.00493074	-0.000153749	-0.00036575	-0.000424616	0.00185958	0.000291654	-4.50963e-05	0.000298628	0.000707782	0.000325377	-0.000301313	-0.000832132	0	-0.000887552	0	-0.00330048	0.000231452	0.000715375	-0.000359457	-0.000424474	-0.00526182
msp_0443	unclassified Parabacteroides	0	0	0	0	0	0	0	0	-3.45742e-05	0	0	0	0	3.91783e-05	0	6.87707e-05	0	0	0	0	0	0	0	-4.76333e-05	0	0	3.08065e-05	0
msp_0444	unclassified Eubacterium	0	0.00015897	0	-0.000160256	4.27004e-05	0	7.75779e-05	-6.89153e-05	-4.59809e-05	0.000209321	1.88405e-05	-9.2431e-05	3.93817e-05	0	-7.71986e-05	0	3.45402e-05	0	-4.43449e-05	0	0	0	0	0.000285692	0	0	0	-0.000671781
msp_0445	unclassified Clostridiales	0	0	0	0	0	0	0	0.000153111	0	0	1.28352e-05	0	0	0	0	3.41674e-05	4.31262e-05	0	0	0	0	0	-8.31808e-05	0	0	-6.73626e-05	0	0.000172889
msp_0446c	Oribacterium sinus	0.000442511	-0.000139209	0	0	-0.000171706	-0.000316732	0	5.01031e-05	0.00419849	4.82735e-05	-5.18063e-05	3.49696e-05	0	3.3889e-05	-0.00015908	0.000262872	0.000501028	-0.000155118	0	0	0	0	0	0.00031363	0	0	0	0
msp_0447	Firmicutes bacterium CAG:272	-1.23062e-05	-1.68349e-05	0.000214914	0	-0.00060481	0	-6.46758e-05	0.00101353	4.03235e-05	0.00315546	-0.000216627	-0.000253751	-0.00053219	0	0.000101289	4.4873e-05	0	-3.03456e-05	-0.000294471	0	0	0	-0.000205048	3.10895e-05	-5.15361e-05	0	-0.000655227	0
msp_0448	unclassified Firmicutes	-0.00013413	0.000272971	-0.000138563	0	0.000875247	0	0.000471657	0.00297202	-0.000784701	-0.000219754	0.000280774	0.000225896	-0.00807477	-9.71572e-05	-8.2323e-05	-0.00042607	-0.00125424	-0.00043251	-0.000261638	0	-0.000235468	-0.000770833	0.000291015	0.000197117	8.49316e-05	6.96384e-05	0.00100064	-0.00157956
msp_0449	unclassified	-0.000275758	0	-0.00161773	0	-0.00519139	0	-7.87037e-05	0.00313912	9.15964e-05	0.000426383	-0.00107531	5.32707e-05	-0.000518774	-0.000590068	0.000146037	-0.000164316	-0.000594509	-0.000247991	0	-0.000736372	4.13993e-05	0.00124913	-0.000225293	0.00017921	-0.000597574	-0.000391515	-0.000288406	-0.00351992
msp_0450	unclassified Clostridiaceae	0.000225704	7.86936e-05	0	0	-0.000930726	3.47574e-05	0	0.000526808	4.53452e-05	-0.00030268	-0.000440328	-5.06296e-05	0.000598369	-3.43664e-05	0.000203511	0	-8.22932e-05	0.000254736	-9.25023e-05	0	0	0	0.000215313	0.0011072	0	0.000452754	-0.000110374	0
msp_0451	unclassified Ruminococcus	0	0.000160129	0	0	0	0	0	-6.11888e-05	0	0	7.13382e-05	0	0.000519676	3.63325e-05	-1.25948e-05	-3.06663e-05	-3.74036e-05	-2.80095e-05	0	0	0	0	0	-2.67642e-05	0.000153381	0	0	-0.000174222
msp_0452	unclassified Clostridiales	-0.000101473	-1.6708e-05	0.000169678	0	0.000336794	-0.000310907	0.000249312	5.48197e-05	0.000184088	-0.000298721	-0.000353202	-0.000662103	0.000214053	-0.00010333	-0.000738615	-6.62837e-05	0.00106017	-8.21278e-05	-0.00101394	0.00019844	0.000173096	0	-0.00156505	0.000447995	0.000258651	0.000146812	0.000639908	0.000264444
msp_0453	unclassified Firmicutes	0	0	0	0	-0.000249242	0	0	0	0	0.000483516	4.83423e-05	4.94585e-05	0.000384272	0	0	0	4.49234e-05	0	9.68779e-05	0.000857738	0	0	0	-2.99062e-05	0	0	0	0
msp_0454	unclassified Clostridium	-0.000992177	9.85423e-05	0.000443412	0	-0.00332191	0.000117925	-0.00068895	0.000426438	-0.00181909	-0.000322099	-0.000591459	-0.00197167	0.000489142	0.000791127	0.000761927	-0.000555659	0.00123509	-0.00173981	-0.00158775	0	-4.43942e-05	0	-0.000562353	-0.000511534	0	-0.000365275	0.000117174	-0.000492222
msp_0455	Candidatus Gastranaerophilales bacterium HUM_21	0	0.00103096	-0.000912099	0.000358586	-0.000168056	0	0	0.000267193	0	-0.00014668	-0.000757273	-9.73941e-05	4.45997e-05	0	1.26466e-05	-0.000335829	-0.000248803	0	0	0.000216165	0	0	0.000197419	0	-0.000119983	0.000345868	0	0
msp_0456	unclassified Gemmiger	-0.000586182	-0.00040644	0.0012377	0	-0.000314842	-0.00118325	0.000947165	-0.00100727	0.000648601	-0.000597479	0.000766947	-0.000784352	0.000550888	-0.000522604	-0.00089433	-0.000848395	-0.00117082	-0.00127307	-0.00199044	-0.000477318	0.00049105	0	-0.00172428	0.000429733	0.0022259	-0.000749625	0.000708357	0.00193505
msp_0457	Faecalibacterium sp. CAG:82	-0.000735026	-0.000397219	0.000272847	-0.00267015	-0.0011136	-0.000237902	0.000403723	-0.000904178	-0.000175662	-0.0023956	-0.000460926	-0.000651036	-0.000729252	9.81096e-05	-0.0010579	-0.000565974	0.0021237	-0.00265073	-0.000733217	-0.000911528	-0.000578082	-0.00229167	-0.00145629	-0.000530374	0.00173086	-0.000875905	-0.00130441	0.00145756
msp_0458	Catenibacterium mitsuokai	-3.00138e-05	5.50934e-05	-7.94136e-05	-0.000163699	5.73494e-05	0	0	-8.67282e-05	-2.12389e-05	-4.70693e-05	-0.00023459	0.000304075	9.99483e-05	0	-2.40476e-05	0.000167985	3.82053e-05	5.64789e-05	0	0	0	0	-0.000245548	-8.34415e-06	0.000223421	0	4.3501e-05	-0.000165897
msp_0459	unclassified Roseburia	0	0	0	0	0	0	0	0	0	0	0	0	0	0	1.67995e-05	0	5.90128e-05	0	0	0	0	0	0	0	0	0	0	0
msp_0460	unclassified Bacteroides	0.000197397	-1.96616e-05	0	0	0	0.000188919	0.000226264	0	-0.000608399	9.92564e-05	0	0	0	-0.000208147	-9.15012e-05	-9.81454e-05	8.65331e-05	-0.000336814	0	0	0	0	3.6348e-05	-0.000370137	-0.000138853	0	0	0
msp_0461	unclassified Clostridiales	0	6.63855e-05	-0.000505933	0	-0.000144472	0	0	-5.432e-05	-2.02906e-05	-0.00021674	-0.000242381	-0.000632466	0.000348257	-3.98676e-05	0.000183772	2.10276e-05	0.000344109	8.73319e-05	4.13076e-05	0	-0.000109574	0	-0.000106107	0.000221202	-6.31963e-05	0.000149534	-0.00051894	0.00074
msp_0462	unclassified Clostridiales	0.000748518	0.00404507	-0.000883893	0	-0.00158355	0	0	0.00101392	-3.20675e-05	-0.000129921	-0.00132964	0.000309472	-9.90713e-05	0.000191964	0.000176663	0.000496673	0.00124112	0.000111108	-0.000957763	-0.000159148	0	-0.00548958	0.00125254	0.000404325	0.000154813	0.000562497	0.00182434	0.0012074
msp_0463	Clostridium sp. CAG:167	4.05042e-05	-2.22092e-05	0.000310366	0	-0.000669024	0	0	0.00166404	3.80456e-05	9.79201e-05	0.000703652	-0.000271694	3.25491e-05	0	-1.43982e-05	-0.00146797	-0.00113027	0	0.000418936	0	0	-0.000793056	-0.000977343	0	0	0	-0.000158712	0
msp_0464	unclassified Eubacterium	-0.000523707	-0.000891502	0	-0.000438034	-0.00020028	-0.00377817	-0.000538994	0.000918562	-0.000731452	0	0.00101084	-0.000281998	-0.000396527	-0.000778456	-0.00090891	0	0.000221128	-0.000304784	-0.000416361	0	-0.000567309	0	-0.000564092	-0.000864384	-0.000584203	0.000824198	-0.000225366	0.0001542
msp_0465	unclassified Verrucomicrobia	-1.36164e-05	0.000222319	-0.000116829	0	0	0	0.000436116	0.000563583	0	0.00244821	-0.000295922	0.000489852	5.77203e-05	0	-6.78362e-05	0	0	0	0	0	0	0	0	0	0	0	9.31366e-05	0
msp_0466	unclassified Burkholderiales	-2.00666e-05	0	0	0	0	0	0	0	0	0	-0.000206641	5.81687e-05	-0.00016742	0	0	-4.73893e-05	2.82507e-05	0	0	0	0	0	0	0	0	4.8345e-05	-2.51875e-05	0
msp_0467	Firmicutes bacterium CAG:94	-0.000556424	0.00167265	0.00167761	0.00112583	0.000436698	-0.000333417	0	-0.000221514	-0.000209056	0.00100981	-0.00136044	0.000547128	0.00132684	-5.93219e-05	0.000137303	0.000701036	0.000756138	-0.00034511	0.0010417	0	0	0.00525069	-0.000614318	4.05239e-05	0	-0.000804707	-0.000257632	0.00662613
msp_0468	Firmicutes bacterium CAG:41	-0.00183382	-0.000773518	-0.00208962	-0.000247863	0.000344685	-0.0149675	-0.000752683	0.000294419	-0.00126014	-0.00886007	0.000698732	-0.000969969	-0.000876961	-0.00254356	-0.00148731	-0.00036447	-0.00157925	-0.00487183	-0.000696361	-0.0011181	0.000838641	-0.00198194	-0.00232924	-0.00479225	0.00239772	-0.00639398	-0.00120055	-0.00306833
msp_0469c	Bifidobacterium scardovii	0	0	0	0	0	0	0	0	0	0	-6.2919e-05	0	0	0	0	0	0	0	0	0	0	0	0	0	0	0	0	0
msp_0470	unclassified Bacteroides	1.97359e-05	0	0	0	0	0	0.000288562	0	1.1116e-05	0	0	0	0	-6.81174e-05	0	0	0	0	0	0	9.99378e-05	0	0	5.75966e-05	0.000359168	0	0	0
msp_0471	unclassified Clostridiales	-0.000650172	0.000520778	0.000881684	-0.000217593	0.000350647	-7.78486e-05	0.000935442	0.00341407	-0.000251096	-0.000443902	-0.000927676	-0.000745523	0.000436058	-0.000143194	-8.17345e-05	0.00299114	-0.000148426	9.26558e-05	-0.00134393	-0.000107709	0	0	0.000635604	0.00101958	0.000308879	-0.000553848	0.000586944	0.000984
msp_0472	unclassified Firmicutes	0	0	-0.0001	0	0	0	0	0.000503723	0	-3.7331e-05	0	-0.000162762	-0.000277203	0	0	0.000315779	0.000102886	0	0	0	0	0	0.000206886	0	0	0.000212287	0.000148862	0
msp_0473c	Clostridium sp. 2789STDY5834874	0.000672348	0.000292764	0.00109647	-0.000323362	0.001088	-0.000596659	0.000600386	-0.000289513	0.000212	-0.00156868	-0.00116258	-0.000659117	0.00024199	-0.000574868	0.00216613	0.000672174	-0.000743565	-0.000528702	0.000530972	0.00030944	0.000164035	0	-0.00120085	-0.00347868	0.00106231	0.00120549	0.000573512	-0.000826939
msp_0474	Dakarella massiliensis	-2.17078e-05	-4.21017e-05	0	0	4.03145e-05	0	0	0	0	0.000250892	-0.000144561	6.31903e-05	8.2691e-05	1.29261e-05	0	0	0	0	8.09012e-05	0	0	0	0.000108068	0	0	-0.000266031	-0.0003253	0
msp_0475	Prevotella sp. CAG:891	-1.01778e-05	0.000420242	0	0	-5.47115e-05	-5.10698e-05	0.000126272	0	9.75832e-05	0	-0.000102897	0	0.000184586	0	0	-7.25502e-05	5.24823e-05	0.00019703	0.0005613	8.50711e-05	0	0	0	0.000238878	0	-5.49628e-05	-8.00941e-05	0
msp_0476	Prevotella sp. CAG:485	0	0	8.87967e-05	0	0	0	0	-9.39908e-05	0	-0.000105822	0	0	0	0	0	0	0	-2.51684e-05	0	0	0	0	0	0	0	-5.53009e-05	-7.30483e-05	0
msp_0477	Firmicutes bacterium CAG:83	0.00318162	0.00467139	0.00250422	-0.000244444	-0.00185938	-0.00478702	0.00068102	0.000280946	0.000864598	-0.000244168	0.00168443	0.000471157	0.000839158	-0.000571279	0.00223324	0.00128796	-0.00109056	0.000823796	0.00312781	-0.000950016	0.000355074	0	-0.00119549	0.0019404	0.0121308	-0.000914502	-0.0016803	0.00106679
msp_0478	Clostridium phoceensis	-0.00126875	0.000864002	0.00169283	-0.000723932	-0.00163744	-0.00211149	0.000655718	0.000379557	-0.00486768	-0.000865461	0.000546446	0.00365619	0.00422744	-0.00401049	0.00569079	0.00261767	-0.00122413	-0.000602076	-0.00121668	0.00323174	-0.00150633	0	-0.00153513	0.00181714	0.000495227	0.00585108	-0.00153885	0.00136543
msp_0479	unclassified Erysipelotrichaceae	0.000130404	0.000418869	0	0.00236009	0	-0.000171784	0.000237217	0	-0.000344341	-0.000105394	3.34804e-05	5.19845e-05	6.14061e-05	-0.000118493	0.000518888	-5.30017e-05	-0.000161565	-0.000191771	4.26351e-05	0	-0.000453947	0	0	0.000253627	0	-0.000203949	-8.79601e-05	0
msp_0480	unclassified Clostridiales	-5.24383e-05	0	0.000311126	0.000177944	0.000201612	0	0.000226718	0	-3.74353e-05	-0.000738077	-0.00037253	-0.00116994	-0.000253564	-0.00011064	-9.42947e-05	-8.67972e-05	-0.000833708	0.000173344	-0.00251172	-0.000195771	3.58316e-05	0	-0.000173466	0.000154406	0	0.000164956	0.000421661	0
msp_0481	Ruminococcus sp. CAG:579	1.62182e-05	0	0	0	-8.4219e-05	0	-0.000245191	0	-7.29988e-05	0	2.15026e-05	2.80219e-05	0.000141671	0	0.000242219	6.69034e-05	0	0.000113109	0	0	0	0	0	-1.05614e-05	-0.000122198	9.00754e-05	0	-0.00041101
msp_0482	Mitsuokella multacida	0.000153005	0.000664618	0	0	0	7.39108e-05	0	-0.000341059	5.63341e-05	0.000125532	-0.000202006	-6.46641e-05	0	0.000189391	-9.44506e-05	0	0	-5.48769e-05	0	0	3.29617e-05	0	0	0.000110525	0.00012922	0.000207375	0.0010522	0
msp_0483	Veillonella sp. CAG:933	0.000119154	-1.77111e-05	0	0	0	0	0	0	0	0	0	0	0	0	0	0	0	0	0	0	0	0	0	0	0	0	0	0
msp_0484	unclassified Faecalibacterium	-0.0020273	-0.000402794	-0.000567343	-0.0024265	0.00149048	-0.00707589	0.000410156	-0.00256721	-0.00283923	-0.00127763	0.00055058	-0.000329815	0.000986242	-0.00148093	-0.00103783	0.0006302	0.000877336	-0.00370481	-0.00250384	-8.64662e-05	-0.000482461	0	-0.00459387	-0.00158757	0.00190642	-0.000892704	-0.000736992	0.00165174
msp_0485	unclassified Bacteroides	-1.19211e-05	0	0	0	0	0.000173179	0	0	8.9118e-05	0	-9.44066e-06	0	0	4.47947e-05	-5.86332e-05	0	0	-5.33051e-05	0	0	0	0	0	5.38072e-05	4.3733e-05	0	0	0
msp_0486	Lactococcus lactis subsp. lactis	-0.000160305	-7.15548e-05	-0.000107131	0.00290236	-0.000134563	0	0	-0.000347188	0.000128869	-0.00154131	-8.65777e-05	-0.000338868	0.00155053	0.000101314	-0.000165291	-0.000544305	0.000573283	-3.36696e-05	-0.000313301	0.000118157	0	-0.00176065	-0.000276068	8.79746e-05	0	-0.000528943	0.000239893	-0.000808272
msp_0487	unclassified Clostridiales	-4.97496e-05	0.000794573	0	0	6.73015e-05	5.26322e-05	0	0.000129105	-3.89691e-05	0.000351385	-0.000673423	0.00019107	0	0	0	8.68114e-05	0.00171526	-0.000164421	-8.79818e-05	0	0	0	0.000312746	0	5.27376e-05	-0.000419116	0.000297798	0
msp_0488	Acidaminococcus massiliensis	0.000206345	0.000661313	0	0	-4.42645e-05	0.00011232	6.29197e-05	-0.000249217	-0.000591795	0	5.09209e-05	-0.000330492	0.000607057	0.000822547	0.000128371	0	-2.90628e-05	-0.000179208	0	0	-0.000246527	0	0	0.000700716	-8.15111e-05	0	0.000394088	0
msp_0489	unclassified Blautia	0.00056478	0.00068358	-0.000233529	0	-0.00196865	0	0.00100076	9.64518e-05	7.8482e-05	-0.000535043	-0.00306732	-0.000460333	0.000564256	-3.87276e-05	-0.000259777	0.000694763	0.00358745	0.000119799	0.00158757	6.61755e-05	0	0	-0.00188829	0.000155823	-9.21953e-05	0.000219887	0.000733396	-0.00037345
msp_0490	unclassified	7.76461e-05	7.62313e-05	0.000368457	0	0.000738553	-5.56049e-05	0.000846815	0.000368902	0.000244693	0.000555871	-0.000264961	-0.000800214	-0.000556184	-0.000442889	0.000774425	0.00126315	0.000991082	-0.00149987	0.000416455	0	0.000780083	0	-0.000643812	-0.000182136	5.92748e-05	0.000681828	0.000388086	-0.000313333
msp_0491	unclassified Anaerotruncus	0	0	-0.000342374	0	3.64011e-05	0	0	0	0	7.86392e-05	-0.000209996	0	0	0	0	0	0	0	0	0	0	0	0	0	0	0	0	0
msp_0492	unclassified Ruminococcaceae	0.000254671	7.99882e-05	0	0	0.000122029	2.21109e-05	0	0	0.000127893	9.69455e-05	0	0.000157444	0.000174047	0.000237828	0	0.000348566	0	0.000315021	-0.000142079	0	0	0	-9.00842e-05	-2.77622e-05	0	-0.000179095	0.000269932	-0.000172296
msp_0493	Eubacterium sp. CAG:603	0	0	0.000109623	0	0	0	0	0	1.33692e-05	5.36903e-05	-6.38302e-05	2.61864e-05	0	0.000134971	8.4944e-05	0	0	0	0	0	0	0	-0.000323341	-1.98049e-05	0.000112438	-4.71246e-05	6.25226e-05	0
msp_0494	unclassified	0	0	-0.000475604	0	-3.52304e-05	0	0	0	0	0.000131391	-0.00021259	8.44636e-05	5.68747e-05	3.03767e-05	0	0.000210389	-3.95798e-05	0	0	0	0	0	0	-1.72379e-05	0	0	3.31018e-05	-0.000676659
msp_0495	unclassified Bacteroides	-1.02116e-05	0	0	0	0	0	0	0	-0.00017759	0	0	0	0	-7.04001e-05	-2.59661e-05	0	0	-2.19705e-05	0	0	0	0	0	0.000138742	0	0	0	0
msp_0496	unclassified Eubacterium	0	0	0	0	0	-3.71089e-05	0	0	-0.000287098	0	0	-0.000141349	-2.21692e-05	6.37682e-05	-0.000128198	0	0	5.13585e-05	0	0	0	0	0	-8.61103e-05	-0.00014111	0	0	0
msp_0497	Enterococcus faecalis	-0.000292996	0.000227918	0	0	6.174e-05	0.000142277	0	0	0.000190603	0	6.89522e-05	-0.000940287	0.000977608	9.94462e-05	-0.000833032	0.000438907	0.000560129	0.000175381	-0.000285383	-3.10107e-05	0	0	0	0.000812511	0	-0.000206225	0.0014101	0
msp_0498	Ruminococcus sp. CAG:488	3.33582e-05	0	0	0	4.78094e-05	0	0.000184179	-8.91582e-05	1.13025e-05	0	-0.00010896	-5.74777e-05	-0.000154536	-2.98961e-05	-0.000140561	0	3.42183e-05	2.64255e-05	0	0	3.78809e-05	0	0	-2.58372e-05	0.00025383	0	0	0
msp_0499	Clostridium sp. CAG:590	0	0	0	0	-3.12412e-05	0	7.55769e-05	0	0	0	-5.35895e-05	2.81032e-05	0.000101283	0	-2.32142e-05	0.000150734	0	0	0	0	0	0	0	0	0	0	0	0
msp_0500	unclassified Firmicutes	0.000330173	0.0010669	-0.000417815	0.000247863	0	0	0	0.000258577	0	-0.000433262	-0.000962478	-0.000241382	0.000260397	0	-2.00341e-05	0.000639536	0.000555776	0.000208325	-0.000281753	0	0	0.00191898	-0.000233098	-2.45068e-05	0	-0.000378234	-0.000287585	0
msp_0501	Megasphaera elsdenii	-7.90208e-05	0.000127976	0	0	2.92447e-05	0	0	-0.000245147	-0.000180101	0	0.000251468	9.27198e-05	3.16638e-05	3.7327e-05	-5.19105e-05	0	0	-8.34374e-05	0	0	7.22694e-05	0	-3.32955e-05	2.56745e-05	0	0	0.000242053	0
msp_0502	unclassified Bacteroides	0.000238121	9.94622e-05	0	0	3.72092e-05	0	0.000105679	0	-0.000222251	0	-6.98557e-05	2.45849e-05	0	-4.91994e-05	0	0	-2.95705e-05	-7.19196e-05	0.000316067	0	0.000109009	0	0.000155806	0.000492785	0	7.80111e-05	0	0
msp_0503	Coraliomargarita sp. CAG:312	1.43412e-05	0	0	0	0	0	0	-0.000108984	0	0	0.000147319	-0.000697357	-0.000340616	0	0	-0.000167482	0	0	0.000339225	0	0	0	0	-1.80095e-05	-5.31086e-05	7.14678e-05	-9.64701e-05	0.000201513
msp_0504	unclassified	9.92737e-06	8.17818e-05	0.000241825	0	0	0	0	-0.000250295	0	-0.000137493	-0.00162066	-0.000448583	-0.000270773	0	-9.35324e-05	-7.20949e-05	0	-6.20172e-05	0	0	3.08452e-05	0	-0.000165965	2.41032e-05	0	0.000103685	0	0
msp_0505	unclassified Oscillospiraceae	1.04942e-05	0.000122662	0	0	7.52857e-05	0	0.000107799	-6.28463e-05	-2.45071e-05	0	-2.49036e-05	-6.78806e-05	0.000102832	0	0	0	0	0	0	0	0	0	-4.92734e-05	0	0	-6.84819e-05	-0.000126779	-0.000492795
msp_0506	Dorea formicigenerans	0.00152045	0.00090724	0.000226788	-0.000913364	0.000873224	-0.00380998	0.00108153	-0.00114687	0.00128787	-0.0018577	0.00233157	-0.00066232	-0.001577	0.000339514	-0.00256969	0.000868673	0.00147557	0.00667883	-0.00161073	0.00146168	0.000936116	-0.00310417	-0.00571653	0.00144614	0.000905125	-0.00241874	0.00244217	-0.000505527
msp_0507	unclassified Eubacterium	0.000574765	0.000571604	-0.00116059	0	-0.000116772	-0.000171489	0.00301469	0	-0.00111918	0	-0.000231051	-0.00108312	-0.000121067	-0.00181902	0.000414068	0.000164505	-0.00209005	-0.00106014	-0.00026538	0	-0.00221134	0	0.000173203	-0.00055086	0.000105476	9.64287e-05	0.000431066	0
msp_0508	unclassified Bacteroidales	0	0	0	0	0	0	0	-0.000222953	0	0.000309869	-2.27012e-05	0.000136727	-0.000145477	0	0	0	-3.6651e-05	0	0	0	0	0	-4.23041e-05	0	0	0	-6.34206e-05	0
msp_0509	Firmicutes bacterium CAG:114	0.00450042	0.00189932	-0.000417286	-0.000474359	-0.000730558	-0.000585177	0.00163325	0.000120154	0.00120933	0.000309117	-0.000560374	0.000382957	0.000731739	-0.000609611	0.00158	0.000745157	0.000660883	0.000527776	-0.000421982	0.000221925	-0.00266804	0.00475116	0.000844567	0.00258374	0.00123647	-0.00161022	0.000746212	0.00497226
msp_0510	Clostridium glycyrrhizinilyticum	0.00401037	0.000998817	-0.000897857	0.000418598	-0.000276222	-0.000841492	-0.000430557	-0.000131574	0.00162066	-8.94061e-05	-0.000206262	-0.000358408	0.00139832	0.000575167	0.0043991	-0.000794791	-0.00118846	0.000286821	-0.000403183	0	0	-0.001	-0.000656592	-0.000681524	0.000305647	-0.000543964	0.00039764	0
msp_0511	unclassified Bacteroidales	-4.85654e-05	9.33515e-05	0	0	0	0	0	0	-7.70854e-05	0.000232981	-3.70092e-05	0	-0.000237382	5.97824e-05	5.56674e-05	-0.000209837	9.31277e-05	0	0	0	0	0	3.90414e-05	2.48392e-05	-0.000201877	0	0	0
msp_0512	Firmicutes bacterium CAG:321	0.00015666	0	-0.00160749	0	9.85818e-05	0	0.00036825	0.000234048	0.00204537	-8.13098e-05	-0.000320414	-0.00408094	-0.000653261	-0.000129309	-0.000882264	0.00345016	0.000167124	0.000262965	0.0001106	0.000104177	0	0	0	0.000117209	6.6882e-05	0	-0.000254392	0
msp_0513	unclassified Clostridiales	0	0	0	0	-7.67876e-05	0	0	0.000234355	1.61448e-05	0	-5.16455e-05	9.73803e-05	0.000206731	0	0	0.000127775	0	0	0.000110423	0	0	0	0	0	0	9.04865e-05	0	0
msp_0514	unclassified Clostridiales	0	0	0	0	0	0	0	0	0	0	-1.52027e-05	2.74881e-05	0	0	0	0	0	0	0	0	0	0	0	0	0	0	0	0
msp_0515	unclassified Clostridium	2.86554e-05	0	-0.000420305	0	0	0	0.000231402	0	-0.000223274	0	0	-5.24696e-05	4.37711e-05	0	3.66604e-05	0	0	-0.000147445	0	0	0	0	-3.32396e-05	-9.32943e-06	0	0	0	-0.000170101
msp_0516	unclassified	0	0	0	0	2.84612e-05	0	0	0	0	0.000150055	1.4022e-05	-4.69291e-05	0	0	0	0	-3.3006e-05	0	0.000103537	0	0	0	0	0	0	0	7.48967e-05	-0.000294111
msp_0517	Bacteroidales bacterium H10	0	0	0	0	0	0	6.99029e-05	-6.24243e-05	2.45052e-05	0	0	0	0	1.51032e-05	1.34459e-05	0	0	-3.18764e-05	0	0	0	0	0	-9.07646e-06	0	0	0	0
msp_0518	unclassified Actinobacteria	1.40243e-05	0.00033839	-0.000118043	0	-0.000113031	0	0	7.19128e-05	2.09451e-05	0	-0.000352247	-8.51713e-05	0.000499141	0	-1.60468e-05	-0.000217568	0.000314056	4.80912e-05	0.000290208	0	0	0	0	0	0	5.69572e-05	-0.000243303	0
msp_0519	Prevotella sp. CAG:924	0	0	0	0	0	0	0	0	-5.47484e-05	0	-5.63545e-05	0	0	0	0	0	0	0	0	0	0	0	0	0	0	0	0	0
msp_0520c	Bacteroides gallinarum	0	0	0	0	0	0	0	0	0	0	0	0	0	0	0	0	0	0	0	0	0	0	0	0	0	0	0	0
msp_0521	unclassified Firmicutes	4.09374e-05	-2.52782e-05	-0.00210298	-0.000756054	-0.000328808	0	-0.000101179	7.98863e-05	0.000335175	0.000910429	-0.000504401	-0.000154836	0.00054922	2.1595e-05	-2.63736e-05	0.000139251	0.000512545	0	0	0	0	0	0.000131145	8.75659e-05	-6.01836e-05	0.00049795	-0.000282112	0.000105741
msp_0522	Anaerotruncus colihominis	0.00265412	0.00152816	-0.0015665	0	0.000699438	-0.000900985	-0.00100836	-0.000431895	0.000551255	0.000211081	-0.000250872	-0.000215503	0.000322568	-0.000231046	0.000421012	0.000437759	-0.000661272	0.00029394	0.00799663	-0.000110867	0.000925104	0.00258333	0.00106905	0.0011066	-0.000829489	0.00131882	0.00139852	0.000542393
msp_0523	unclassified Alistipes	0	0	0	0	0	0	0	0	0	0	0	0	0	0	0	0	0	0	0	0	0	0	-0.000172149	0	0	0	0	0
msp_0524	unclassified Lachnoclostridium	0.00101737	0.00149162	0.000178388	0	-0.00102537	0	0	0.000307147	1.3498e-05	-0.000108786	-0.000318746	0.000335075	0.00136797	0	0	0.000252548	0.00175919	-6.24731e-05	-0.000303427	0	0	0	0.00032408	-1.43885e-05	0	-0.00091896	-0.000195544	0
msp_0525	unclassified Bacteroidales	0.000145578	0	0	0	0	0	0	0	2.20451e-05	0	1.09351e-05	0	0.000192273	0	0	0	0	-3.34165e-05	0	0	-0.000327692	0	0	3.68876e-05	0	0	0	0
msp_0526	unclassified Firmicutes	0	0	-0.000497877	0	-0.00144187	0	0.000141805	0.00118361	0	0.000215937	-0.000211613	-2.33079e-05	-0.00017258	0	0	0.000118578	0.000484573	0	0.000118314	6.41956e-05	0	0	-0.000173041	2.50359e-05	0	-0.000828489	0.000869417	0.000241259
msp_0527	Clostridium sp. CAG:307	0	0	-0.000260031	-0.000254986	0	0	0.000143735	0.000121073	0	0.000151833	-0.000440689	3.90484e-05	-0.000165802	-5.12373e-05	-3.84615e-05	0	-4.9783e-05	0	-7.61082e-05	0	0	0	-0.000477111	0	0.000139082	0	4.91629e-05	-0.000175223
msp_0528	unclassified Parabacteroides	0	8.17813e-05	0	0	0	0	0	-0.00014375	0	-4.81591e-05	-9.90986e-05	0	0	0	0	0	-5.11982e-05	2.67718e-05	0	0	0	0	0	0	0	0	5.54537e-05	0
msp_0529	Eubacterium sp. CAG:581	-3.09351e-05	0	-0.000231296	0	-4.95157e-05	-0.000150574	0.00048503	0	0.00149658	0	-1.6477e-05	0.000183543	0.000104669	-0.000300016	0.000452596	0	0.000379383	-0.000292586	-8.15984e-05	0.00041416	0.000108955	-0.00075	0	-0.0017581	-0.000189859	0	-0.000217665	0
msp_0530	Dorea longicatena 2	0.00151181	0.000246442	0	-0.000837241	-0.000531897	-0.00671378	0.00168433	-0.000831667	0.000702429	-0.000240883	-0.000620792	-0.000349128	-0.00173086	-0.000578654	-0.000852521	-0.000598573	0.00108336	-0.000611383	-0.00128308	-0.000707383	0.000630733	-0.000729167	-0.00418304	-0.00176227	0.000874831	-0.000779797	0.000924666	-0.00128956
msp_0531	unclassified Muribaculaceae	0	0	0	0	0	0	0	0	0	0	0	0	0	0	0	0	0	0	0	0	0	0	0	0	0	0	0	0
msp_0532	unclassified	1.43208e-05	0	0	0	0.000247517	0	0	-0.000342722	-2.32051e-05	0	-0.000138881	-0.000453958	-0.000141219	0	0	4.47121e-05	0	0	4.51357e-05	0	0	0	0	0	0	0	0	0
msp_0533	unclassified Lachnospiraceae	-3.0163e-05	0	0	0	-0.000129258	0	0	0	-3.55407e-05	0	-0.000203793	9.33145e-05	0	-0.000123237	-0.000109606	0.000109126	-0.000100201	6.82478e-05	0.000870222	-0.000140769	0	0	0	0	5.53483e-05	0	-0.000101791	0.000180952
msp_0534	Firmicutes bacterium CAG:176_63_11	0.000351514	0.000568576	0	0	-0.000857948	0	0.000158803	0.000254685	0.00123319	-0.000241379	0.000872364	-0.000381131	0.000265333	-0.000128182	-0.000776525	0.000893887	-0.000151237	-0.000404511	0.000318545	0	-0.000394585	-0.00433333	-0.000331757	0.000223705	-0.00088601	0.000349611	-0.000201447	-0.0014462
msp_0535	unclassified Prevotellaceae	-2.96e-05	0	-0.000127532	0	5.13773e-05	0	0	-0.000760518	0	-0.000178846	-0.000157627	-0.000117298	2.97251e-05	0	4.93947e-05	0	0	4.21935e-05	0	0	0	0	0	0	0	0	3.19378e-05	0
msp_0536	unclassified Clostridiales	0.000148332	0.000798503	0	0	8.25001e-05	0	0	0.000392386	3.24026e-05	0.000806687	-7.66269e-05	3.37217e-05	-0.000104974	0	2.29606e-05	9.74929e-05	0.000350939	9.43616e-05	0	0	0	0	-0.000103036	1.95941e-05	0	-0.00012004	0.000419865	0.000355556
msp_0537	Alistipes sp. An31A	0	0	0	0	0	0	0	0	0	0	-0.000114003	-6.99436e-05	8.28073e-05	0	0	0	0.000338768	0	-0.000193209	0.000132832	0	0	3.31381e-05	0	0	0	0	0
msp_0538	Phascolarctobacterium succinatutens	0.000800792	0.00178549	0.000414281	0	0.000910788	0.000418619	0.000995839	-0.00040106	-0.000427484	-0.000109661	0.00154857	-0.000676729	0.000815217	0.000321894	0.000182254	-0.000105898	-0.00051513	-0.000635977	0.000143963	0	0.000110361	0	0.000168403	0.000170547	0.00149448	0.000109986	-0.000200067	0.00058906
msp_0539	unclassified Roseburia	0	0	0	0	0	0	0	0	0	8.37388e-05	-1.76319e-05	0	0	0	0.000317081	-3.92596e-05	0	0	0	0	0	0	0	8.6885e-06	-5.16236e-05	0	-3.42909e-05	0
msp_0540	Clostridium sp. CAG:448	0	0	0	0	0	0	0	0	0	0	4.78604e-05	0	0	0	0	0	0	0	0	0	0	0	-2.56222e-05	0	0	0	0	0
msp_0541	unclassified Clostridiales	0.00182115	0.0003391	-0.000208618	0	1.81073e-05	6.95588e-05	0.000246396	0.00801347	-1.13334e-05	0.00254119	0.000277185	0.000693774	-0.000281728	3.40288e-05	7.67153e-05	0.000238396	0.00134547	0.000370297	-0.000285428	0	-0.000363871	0	0.000512829	-3.31377e-05	0	0.000125737	-8.05654e-05	0.00409275
msp_0542	Clostridium sp. CAG:230	-0.000168629	-9.06556e-05	0.000243356	0	-0.000586089	-0.00127512	-8.40086e-05	0.00285505	-0.000885787	0	-0.000196164	-0.0010543	0.000151257	-0.000308002	-0.000453342	-0.000375976	-0.00047302	-0.00100692	-0.000265466	0	0.000178517	-0.000479167	-0.00169594	-0.000481513	-0.000313339	-0.000294969	-0.000530754	-0.000439846
msp_0543c	Alistipes sp. CHKCI003	0	0	0	0	0	0	0	0	0	0	0	0	0	0	0	0	0	0	-9.06594e-05	0	0	0	0	-1.83121e-05	0	0	0	0
msp_0544c	Escherichia fergusonii	-1.13043e-05	0	0	0	0	-0.000160067	0	0	-0.000130202	0	0	0	0	0	1.35101e-05	0	0	0	0	0	4.12925e-05	0	0	-0.000117567	0	0	0	0
msp_0545	Pseudoflavonifractor sp. An184	-0.000252492	0.00111379	0	0.000233262	0.000560822	8.31415e-05	0.000438859	-0.00020759	-0.000105474	-0.000189302	-0.00078877	0.00419269	0.00085178	0	-7.53669e-05	0.00157697	-0.0001027	-0.000367838	0.000188565	0	0	0.00101042	0.00025814	-0.000263641	-7.16347e-05	-0.000345058	-0.000430572	0.00113054
msp_0546	Clostridium sp. CAG:245	0.000109781	0.000203761	0.000615698	-0.000576923	-0.00605568	-3.98215e-05	0.000473291	0	0.000223053	-0.000643367	-0.00204322	0.000427458	0.000736319	-0.000967027	0.000219027	-0.000235019	0.000315606	-0.00132047	0.000270403	0	5.92254e-05	0	0.00011039	0.000212622	0.000481284	-0.000142702	-0.000131467	-0.000309558
msp_0547	unclassified Bacteroidales	-3.12959e-05	-2.18518e-05	-0.000173748	0	0.000263577	0	0	0	2.5896e-05	0	0.000266865	0.0001697	0.000298781	0	0.000133854	5.21633e-05	0.000248447	0	0	0	3.35891e-05	0	0	-5.19951e-05	0	0.000542228	0.00138063	0
msp_0548	unclassified Eubacterium	-1.8405e-05	0	0	0	-5.91159e-05	-0.000252473	0	0	5.64217e-05	0	-8.47306e-05	-0.000108087	0	1.9851e-05	0.000418431	0	0	6.72032e-05	0	0	3.00558e-05	0	-4.15802e-05	0.000220834	9.01595e-05	0	0	0
msp_0549	unclassified Prevotella	-5.30126e-05	-7.34666e-05	0	0	0	0	0	0	2.13338e-05	0	0	0	0	0	0	0	0	0	0	0	0	0	3.82163e-05	-1.03037e-05	0	0	-3.54407e-05	0
msp_0550	unclassified Lachnospiraceae	0	0	0	0	0.000121544	0	0	0	0	0.000622461	0	-0.000127936	-6.76214e-05	0	0	0	0	0	0	0	0	0	-0.000372541	0	0	0	0	-0.00116174
msp_0551	Eubacterium sp. CAG:192	-0.000552137	0.000124542	-0.000559106	0	5.50018e-05	-0.00184744	0.000629006	0	-0.000847575	-0.000152209	0.000553198	-0.000605087	-0.000224411	-0.000636383	-0.000938813	-0.000200938	0.000339799	-0.000897329	-0.000470929	-0.000249567	0.00153641	0	-0.000619468	-0.000990165	-0.000430283	0.000321995	0.000131039	0
msp_0552	unclassified Clostridiales	0.000475772	0.000540505	0.000337363	0.000356838	-0.000308776	0	5.33951e-05	0.00211152	-0.000152494	0.000838282	0.000524249	0.000146789	0.00106541	-4.87821e-05	-4.46098e-05	0.000283542	0.000477314	-4.63635e-05	0	0	0	0	0.000210756	5.31362e-05	0	-0.000216344	0.000352647	0.000310101
msp_0553	unclassified Clostridiales	1.54879e-05	-1.65323e-05	-0.00103708	0	-0.000816579	0	-9.88309e-05	0.000244437	0.000179291	-0.000163662	0.000679122	-0.00022534	0.000602772	-8.74377e-05	7.077e-05	0.000456577	0.000129771	-0.000215191	0.000820589	-0.000112398	0	0	0	-4.43465e-05	0.000187739	0.00026022	0.000357098	0
msp_0554	Anaerostipes hadrus 2	0.000244964	0.000229071	-0.000924884	0	0.00040505	0	0	0.000717939	-0.000191005	-0.000498712	-0.00039083	-0.00386582	-0.00201994	-0.000408457	-0.00137043	0.00125506	-0.000458728	-0.000174187	-0.00339987	-0.000457306	-0.000406303	0	0.000277437	0.000142927	0.000421402	-0.000268437	0.000463557	-0.000858032
msp_0555	Subdoligranulum sp. CAG:314	-3.12886e-05	0	-0.00031116	-0.000519231	-0.000464543	0	0.000217237	0.00169649	-1.72304e-05	0.00275039	-0.000466866	-6.83189e-05	-0.00130599	5.74227e-05	3.93169e-05	-0.000103802	0.000333397	0.000401771	0.000238037	0.000137683	0	0	0.000701187	0	0	-4.65512e-05	0.000119323	-0.00091895
msp_0556	unclassified Firmicutes	0	0	-0.00010843	0	0	0	0	0	0	0	-0.000199329	7.34272e-05	0.000620257	0	0	0	0	0	7.15841e-05	0	0	0	-9.88354e-05	2.23497e-05	0	-0.000128477	-0.000122503	0
msp_0557	unclassified	0	0	0	0	0	0	0.00267182	0	-0.000116328	0	0	0	0	-5.79338e-05	0	0	0	9.14524e-05	0	0	0	0	0	0.000149322	-3.49831e-05	0	0	0
msp_0558	unclassified Blautia	9.77964e-05	-1.42068e-05	0.000789028	0	3.72922e-05	0	0.0012091	-0.000202865	0.000245548	-0.000138084	0.000554385	8.86411e-05	0.000876815	-0.000210607	-0.000281842	0.000613445	-0.000398686	0.000327002	-0.000674321	0	0	0	-0.000320323	0.0015052	0.000326458	-0.00074584	-0.000584763	0
msp_0559	unclassified Lachnospiraceae	-1.34387e-05	0	0	0	0	-1.95336e-05	8.17607e-05	0.000163435	-6.23061e-05	0	-0.000643396	-4.62576e-05	0	-0.000128694	-0.000589166	0	-7.35296e-05	0	8.80867e-05	0	-0.000679643	0	-6.68941e-05	-0.000230646	0.000729234	-8.99184e-05	-0.000110652	0
msp_0560	unclassified Firmicutes	0.000154289	-0.000103675	0	-0.000283654	0.000337758	0	0	0.00274343	0	0.00210107	-0.000335078	0.00218651	-0.000173008	0	-4.96299e-05	0.000708944	0.00027104	0.000600743	0	0	0	0	0.000314777	7.48787e-06	0	-0.000138114	-0.000294629	0.000476556
msp_0561	unclassified Clostridiales	-0.000461766	-0.000139108	0.000338303	0	0.000465619	0	0.000400777	0.000143824	0.000129711	-0.000323863	-0.000447314	-0.000825611	0.000121176	6.9505e-05	0.000537141	0	3.85549e-05	-0.00041749	-0.00022668	0.000139418	0	0	-0.000142855	-4.93845e-05	-9.97582e-05	0.000393934	0.00023376	0
msp_0562	Enorma massiliensis	1.23196e-05	7.29127e-05	0.000140958	0.00034188	0	0.000104396	-0.00062675	-0.000143609	0.000687373	0.0014461	-2.10259e-05	-0.000577735	0.00057996	-0.000209713	-4.27224e-05	0.000329535	5.73415e-05	-0.000335141	0.000132879	0.00198937	0	0	-0.000195722	-0.000129436	7.84743e-05	0	0.00103757	0
msp_0563	unclassified Clostridium	0.000459921	-0.000307924	0	0	-0.00147968	-0.0116284	0.00130309	0.00047289	0.00054304	-0.00416529	-0.00143174	0.000612064	0.000500762	-0.000784567	-0.00071754	-0.00068649	-0.00153472	-0.00172623	-0.00314687	0.00177414	0.00123045	0	-0.00138427	0.000498401	0.00037006	-0.0013226	-0.000745902	0.000616204
msp_0564	Fusobacterium sp. CAG:439	0	0	-0.000120709	0	0	0	0	-0.00012811	0	0	-0.000642788	4.44652e-05	7.27224e-05	0	0.000128575	-3.78449e-05	0	0	0	0	0	0	3.95327e-05	0	0	5.41283e-05	9.06689e-05	0
msp_0565	unclassified Ruminococcaceae	-0.00107356	0.000499256	-0.000444529	-0.00024359	-0.000133758	-0.000300125	-0.000139745	0.000922501	0.000308627	-0.00033526	-0.000534601	-0.00114206	-0.000652404	-9.55979e-05	0.000460985	-0.000277513	-0.000634924	0.000562019	0.000771063	0.000895629	0	0.00653125	-9.24759e-05	0.000675797	0.000220136	0.0005714	0.000723858	0.00120509
msp_0566	unclassified Firmicutes	0	0.000189337	0.000127661	0	-0.000202784	0	0	0	7.08671e-05	0.000525499	-0.00215116	0.000273593	0.000871594	0	3.17243e-05	0.000955556	0.00246885	-0.000226128	-0.000890802	0	0	0	0.00123961	-1.88332e-05	0	0	-0.000251151	-0.00149924
msp_0567	Firmicutes bacterium CAG:475	0	0	0	0	-4.88803e-05	0	0	-4.72607e-05	0	0.000496265	-0.00104147	-9.42323e-05	4.67128e-05	0	-4.14001e-05	0	-4.39154e-05	0	0	0	0	0	0.000100051	3.01255e-05	0	0	0	0
msp_0568	Prevotella sp. CAG:1124	-3.36571e-05	-3.27495e-05	0	0	0	0	0	0	-0.000595845	0	-3.75638e-05	0	0.000447186	0	0	0	0	0	0	0	0	0	0	0	0	0	0	0
msp_0569	Anaerotruncus sp. CAG:528	4.76348e-05	0	0.000115111	-0.000189744	0	0	0.000108351	-5.18948e-05	0	0	-9.55706e-05	0	0	-1.85004e-05	0	0	-0.00018419	0	0	0	-6.02629e-05	0	-0.000210825	0	0.000149793	-3.53465e-05	-9.34596e-05	0
msp_0570	Bifidobacterium dentium	-0.000644584	-0.000290147	0	0	-0.000129585	0.000304226	-0.000231577	-0.000251617	0.00324086	0.00374481	-0.00017269	5.56888e-05	0.000330813	0.0108656	0.00267722	-0.000711936	-0.00128417	0.00161334	-0.000453842	0.00112572	6.53144e-05	0	8.56124e-05	-8.90849e-05	-0.000226994	0.00170419	0.000841883	0.000872114
msp_0571	unclassified Eubacterium	0	0	0	0	0	0	0.000225311	0	-0.000203161	0	0	0	0	-0.000156084	0.000395189	0	0	-8.55336e-05	0	0	-0.000428806	0	0	0.000209062	-0.00225052	0	0	0
msp_0572	Lachnospira sp. 2789STDY5834967	-0.00101643	-0.00115054	-0.00591578	-0.0016599	-0.00105039	-0.0130067	-0.0016706	-0.00165382	-0.00171027	-0.00387425	-0.000834983	-0.00107737	-0.00525058	-0.00222265	-0.000832557	-0.000670809	0.000660643	-0.00298192	-0.000559707	-0.00193103	0.000362623	0	-0.00155309	0.000979168	0.00198023	-0.00486723	0.000721903	-0.00412076
msp_0573	Eggerthella lenta	0.00137736	-0.00147267	0.000593295	0.00110589	0.000876514	-0.00108571	0.0029903	0.000342823	0.00102566	-0.000176124	0.000240687	-0.00178433	-0.00200879	-0.000424394	0.00308595	0.000414157	-0.000687352	0.00152906	0.00153585	-0.00190463	-0.000850282	0.0045	0.00144962	0.00222604	0.00348679	0.00104862	-0.00144371	0
msp_0574c	Fusobacterium necrophorum	1.29105e-05	0	0	0	0	0	0	0	0	0	0	0	0	0	0	0.000157897	0	0	0	0	0	0	0	0	0	0	0	0
msp_0575	Eubacteriaceae bacterium CHKCI004	5.66613e-05	0.000152504	0	0.000904487	-0.000350535	0	0	-0.000108876	0	-4.19832e-05	0	0	0	0	0	0	0	-0.000110038	6.50603e-05	0	0	0	0	0	0	0	0	0
msp_0576	unclassified Lachnospiraceae	-0.000567806	-0.000153256	0	0	-0.00151436	-0.000246764	0.00203936	0.000132373	-0.000569663	0.000142265	-0.000239257	-6.48121e-05	-3.69231e-05	-0.000266313	-0.000629047	0.000103145	-0.000134629	-0.000596367	-0.000131065	0	-0.00113864	0	-0.000738973	-0.000595276	-0.00109216	4.34998e-05	0.00019172	0.000423492
msp_0577	Clostridium sp. CAG:1013	-1.65053e-05	-2.15299e-05	0	0	0	0	0	0	7.03968e-05	0	2.05856e-05	0	0	1.37121e-05	-2.94623e-05	0	0	0	0	0	0	0	0	6.01111e-05	4.17389e-05	0	0	0
msp_0578	Clostridium sp. CAG:269	8.35101e-05	0.000272048	0.000268875	0	-0.000340143	2.10893e-05	0	0.000160303	0.000114199	-0.000377979	0.000256897	-0.000949686	-0.000282281	0.000121072	6.75832e-05	-0.000156892	0.000554482	0.000144384	0	0	0	0	-0.000370889	0.000248547	-0.000261106	0.000105351	-6.64755e-05	-0.000464691
msp_0579	unclassified Lachnospiraceae	0	0	-0.000467463	0.00221083	0.000476863	-0.000142624	0	0	0	0	2.70234e-05	0	-6.29888e-05	0	-4.33594e-05	0.000136501	0.000111872	0	0	0	0	0	0.000134725	0	0	0	-5.09288e-05	0
msp_0580	unclassified Fusobacterium	-1.45404e-05	0.000526533	0	0	3.70591e-05	2.76257e-05	0	0	0	0	0	0	0	-0.000297651	0	0	0	0.000599742	0	0	0	0	-6.08746e-05	5.2393e-05	-0.000217732	0	0	0
msp_0581	Firmicutes bacterium CAG:212	-0.00025749	-5.9119e-05	0.000105261	0	-0.000501495	-0.0016729	0.00144804	0.000170651	0.000385167	6.17431e-05	-0.000697238	0.000130849	-0.000241049	-0.000865086	-0.000976052	-0.00024401	0.000254589	-0.000337213	-0.00145932	0	-0.000574239	0	-0.000270184	0.000296176	-0.000523481	-0.000227229	0.000738332	0.000862222
msp_0582	Clostridium sp. CAG:632	0	0	0	0	0	0	0	0	0	0	-4.76278e-05	0	0	0	0	0	0	0	0	0	0	0	0	2.77489e-05	0	0	0	0
msp_0583	unclassified Gemmiger	-0.000276134	0.000558041	0.00115416	0	-0.00055717	0	0.00050427	-0.000579854	5.14744e-05	-0.00013841	0.000904591	0.00157796	0.00135029	-2.90713e-05	0.000364586	0.000854852	0.000159603	0.000225595	-0.000120973	0	0	0	0.00110508	0.000197333	7.77005e-05	-0.00018018	-5.17388e-05	-0.000858556
msp_0584	Eggerthella sp. CAG:298	0.000299913	0.000475153	0.00033201	0	-0.00183299	0	0.000454678	0.000772983	-0.00016306	9.46119e-05	-0.000186246	-0.000317907	-0.000483995	-0.00015827	-0.000264349	0.000184737	0.000578885	-0.00207001	-0.00067789	-0.00016519	0	0	-0.000917206	-0.000369523	-5.37665e-05	0.000252364	0.000239554	0.00137315
msp_0585	Methanobrevibacter smithii 1	0.000478828	2.49025e-05	-0.00151819	-0.000842593	-0.000330655	0	0	-0.000555108	0.000324055	0.000128409	0.000210441	-0.000514211	0.000266951	0.000226567	0.000116142	0.00806138	0.000798026	0.000713697	0.000256195	0	0	0	0.000323344	-0.00020318	0	-0.000112603	0.000854578	-0.000736422
msp_0586	Clostridium sp. CAG:343	-0.000206364	-1.54644e-05	-0.000397981	0	-8.8735e-05	-0.000245324	0.000412025	-8.87904e-05	-0.000117773	0	0.000454748	-0.000405338	0.000154654	6.83648e-05	-0.000214424	0.00159721	8.46162e-05	-0.000124634	-0.000252642	0	0	0	5.47896e-05	-0.000109303	0	-0.000117269	0.000136972	-0.000358074
msp_0587	unclassified Fusobacterium	0.00014919	0	0	0	0	-5.19398e-05	5.43322e-05	0	0.000122172	0	0	0	0	6.53059e-05	-0.000269836	0	0.00016481	-0.000212386	0	0	0	0	0	-0.000385482	0	0	0	0
msp_0588	unclassified Clostridiales	-3.25649e-05	0.000952876	0	0	-8.60932e-05	0	0	0	5.52231e-05	0.00144834	0.000107613	0	8.38146e-05	0.000117832	0.000227919	7.38229e-05	7.44458e-05	-7.65937e-05	0	0	0	0	-6.75619e-05	0	0	0.000245976	0.000816796	0
msp_0589c	unclassified	0	0	0	0	0	0	0	0	0	0	-1.33214e-05	0	0	0	0	0	0	0	0	0	0	0	0	0	0	0	0	0
msp_0590	unclassified Parabacteroides	0	0	0	0	0.000121133	1.04666e-05	0	0	-0.000147777	0	0	0	0	-1.1704e-05	-1.73487e-05	0	0	0	0	0	-0.000314965	0	0	-5.6277e-05	7.75593e-05	0	0	0
msp_0591	unclassified Clostridiales	0.0012483	0.00416262	-0.00204721	-0.00100427	0.00092163	-0.00499524	0.000737601	0.000422217	-0.00201966	-0.00015471	0.00209818	-0.00092305	0.000692027	-0.00180234	-0.00427622	0.00132177	0.000870877	-0.00362236	-0.000881654	0.000180451	0.000678433	0.000760417	-0.00204187	-0.00277487	0.000757739	-0.0062683	-0.00162878	-0.0014354
msp_0592	unclassified Clostridiales	0.000456208	-9.80165e-05	-0.00100658	-0.000358381	0.000383546	2.38886e-05	0.000200673	7.06831e-05	0.000513869	-0.000129443	0.000818873	0.000777427	-0.000930929	-0.000153811	-0.00025742	0.000407236	0.000536013	-0.00019715	0.000388044	-0.000153439	0.000316547	0	-0.000883007	0.000245031	0.00226721	-0.000150127	-0.000285422	0.00193498
msp_0593	unclassified Muribaculaceae	0	0	0	0	0	0	0.000148049	-0.000346677	0	0	-2.95382e-05	0	0	4.89193e-05	0	0	0	2.5411e-05	0	0	-0.000381884	0	0	0	0	0	0	-0.0004642
msp_0594	Phascolarctobacterium sp. CAG:266	-0.000154112	0.000135954	-0.00461667	-0.000632173	-0.00064649	-2.30863e-05	-0.000305934	0	-0.0022552	-7.13315e-05	0.000262577	0.000236021	0.00178377	-4.96884e-05	0	-0.000195304	-0.000285318	-0.000196136	0	0	0	0	-0.000225661	0.000322462	7.21219e-05	0.000131533	-0.000611251	-0.000831704
msp_0595	Cryptobacterium sp. CAG:338	0.000310749	0.000556395	-0.00284861	-0.000403846	0	-3.94018e-05	0.000203169	0.000318475	-0.000409642	0.000157197	-0.000635358	-0.000587306	0.00107811	5.89006e-05	-0.000787035	-4.59553e-05	0.000145824	0.000297261	-0.000358751	0	2.74439e-05	0	7.37756e-05	0.000656904	0.000342925	0.00235624	0.000197606	0
msp_0596	unclassified Firmicutes	7.83521e-05	0	-0.0010292	-0.00339031	-0.00118539	-0.000125669	0.00403711	0.000351134	0.000129907	-0.000215541	-0.00105529	0.000855102	0.000642653	-0.000484635	0.000331707	-0.000200044	-0.000395331	-0.000427822	-0.000766154	0	-0.000419369	0	0.000875356	0.000369224	0.00040313	0.000341957	0.0014653	0.00265988
msp_0597	unclassified Clostridiales	3.21737e-05	9.19379e-05	0	0	4.3101e-05	-5.85763e-05	-0.000182266	0	-0.000134653	0	0	-0.000253984	0.000919561	-0.000650745	0.00191798	0	0	-7.82714e-05	-4.88682e-05	0	-0.000271925	0	0	-0.000226463	0.000125746	0	0	0.000123561
msp_0598	Prevotella sp. CAG:1092	-8.88979e-05	0.000202836	0	0	0	0	-0.000114167	0	-9.4424e-06	0.000158243	0	3.60416e-05	0	0	0	-0.000108933	-3.83224e-05	9.49629e-05	-0.000118839	0	2.27671e-05	0	-8.5495e-05	0	0	-4.90303e-05	-6.40328e-05	0
msp_0599	unclassified Prevotella	2.97314e-05	0.000170571	0	0	0	-3.2982e-05	0	0	0	0	2.37441e-05	2.36236e-05	0	0	0	0	6.61008e-05	0	0	0	0	0	0	2.12117e-05	0	0	0	0
msp_0600c	Weissella cibaria	7.41832e-05	0.000163059	-0.00012182	-0.00039708	0	-3.62661e-05	0	-9.14698e-05	3.85068e-05	5.46973e-05	0	-0.000141724	0	0.000209578	-0.000241906	0	7.63724e-05	0	0	0	-9.64937e-05	0	0.000102226	-0.000441891	0.000955947	0	6.42969e-05	0
msp_0601c	Anaerofustis stercorihominis	-1.5544e-05	-2.88081e-05	0	0	-0.000463248	-9.13433e-05	7.80479e-05	-6.47742e-05	-0.000256586	0	1.41117e-05	-9.30331e-05	0	-2.09297e-05	-0.000168541	0.000615749	0.000360242	-2.33785e-05	0	0	0	0	-0.000436493	0.000454779	0	-4.49791e-05	0	-0.000512501
msp_0602c	Streptococcus infantis	0.00141118	-0.00109054	0	0	0.000242155	-0.000130379	0.000155078	-0.000160137	0.00755806	-0.000167577	-1.89605e-05	-0.000359481	-0.000163066	0.00109301	-0.000286268	0.000511175	-0.00012115	0.000456386	0.000119925	0.00018077	0	0	-9.19061e-05	7.54231e-05	0	0.000279051	0.000923896	0.000245432
msp_0603c	Selenomonas artemidis	-3.10878e-05	0	0	0	0	0	0	0	0	0	0	0	0	-0.000289485	0	0	0	0	-9.45839e-05	0	0	0	0	0	0	0	6.41286e-05	0
msp_0604	Dorea sp. CAG:105	0.000403828	0.00358273	-0.00558426	-0.00188989	0.000142234	-0.000994128	0.00103804	-0.00231033	-0.000262273	0.000272523	0.00175092	-0.00151643	-0.000654103	-0.000172976	-0.0018577	-0.000548804	0.00121208	-0.000262637	-0.00150056	0.00392678	0	0	-0.000540723	0.00174135	0.000660625	-0.00118159	0.00369243	-0.00107906
msp_0605	unclassified Firmicutes	-1.40718e-05	0	0	0	6.0365e-05	0	0	0.000494717	-1.07501e-05	0	0.000338683	0.000104503	-0.000216583	-1.97472e-05	-0.000134386	-8.69924e-05	0.000422576	8.83057e-05	-0.000307765	0	0	0	5.20606e-05	0	-7.52933e-05	0	0	-0.000388444
msp_0606	unclassified Ruminococcus	0	0	0	0	0	0	0	0	0	0	0	2.71423e-05	0	0	0	0	0	0	0	0	0	0	0	0	0	0	0	0
msp_0607	unclassified Paraprevotella	0	0	0	0	0	0	7.45525e-05	0	9.97291e-06	0.000135612	0	0	0	0	0	0	0	0	0	0	0	0	0	0	0	0	-3.4106e-05	0
msp_0608	Bacteroidales bacterium H4	0	0	0	0	0	0	0	0	0	0	-0.000135812	3.38664e-05	-3.61521e-05	0	0	6.88892e-05	3.40879e-05	2.87977e-05	0	0	0	0	-3.94774e-05	0	0	0	3.07729e-05	0
msp_0609	unclassified Bacteroides	0	0	0	0	0	0	0	0	0	0.000495267	-5.96997e-05	0	0	0	0	0	0	0	0	0	0	0	0	0	0	0	0	0
msp_0610	Fusobacterium nucleatum subsp. animalis	0.00818758	0	-0.000247987	0	0.00213425	0.000973816	-6.50645e-05	-9.92959e-05	0.000364377	0.00722405	0	0.00594889	0	0.00299536	-2.64966e-05	0.00499792	0	0.00466736	0.000255791	0	0	0	0	0.000271884	0	3.67048e-05	0.00152523	0
msp_0611	Bacteroidales bacterium H2	9.94682e-05	0.000109178	0	0	-6.60963e-05	0	0	0	-6.09344e-05	0.000166339	2.9593e-05	0	0	9.18586e-05	-1.9228e-05	0	-5.17877e-05	2.98759e-05	0	0	-0.00295144	0	-0.000231016	0.000157553	0	-0.000203716	-0.000276436	0.00027522
msp_0612	unclassified Firmicutes	1.67429e-05	2.31666e-05	0	0	3.10425e-05	0	0	-0.000160243	0	0.000198734	1.81621e-05	0.000213775	4.17712e-05	-2.10026e-05	0.000204027	0.000100857	6.06128e-05	0.000100638	-4.42586e-05	0	0	0	-0.000113001	-0.000106159	-0.000113289	0.000147171	0	0
msp_0613	unclassified Clostridiales	0.000834068	0.000647413	-0.000152381	-0.000476496	0.000137167	0	0.000309931	0.00309094	-2.96343e-05	0.000150473	0.00016637	0.00133839	0.000636232	0	-9.55953e-05	0.0024621	-0.000111909	0.000121034	0.000651099	0.000152895	0	0	9.36891e-05	-4.38997e-05	0.000108662	-0.000614518	0.00151395	0.000551919
msp_0614	unclassified Muribaculaceae	1.99391e-05	0	0	0	0	0	0	0	0	0	1.24057e-05	2.65225e-05	0	0	0	0	0	0	0	0	-0.00025507	0	-0.000121568	1.2674e-05	0	0	0	0
msp_0615	unclassified Clostridiales	6.5835e-05	2.87482e-05	0	0	0.000915876	0	0	-0.000127479	0.000827798	0.000267182	-0.000246641	0.000177507	-0.000317398	-0.000208281	-0.000314763	0.000344589	-0.000104476	-0.000144483	-0.000338233	0	6.9891e-05	0	-3.68112e-05	0.000258105	-0.000290611	-5.95532e-05	0.000268425	-0.000838889
msp_0616	Prevotella buccae	-4.78931e-05	0.000251789	0	0	0	0	0	0	3.73491e-05	0	-8.5801e-05	2.1729e-05	0.000136676	0.00680343	3.29677e-05	0	0	-6.23689e-05	0	0	0	0	0	0.000145779	0	0	0.000130152	0
msp_0617	unclassified Burkholderiales	0	0	0	0	9.81588e-05	0	0	0	0	-3.45945e-05	3.74887e-05	-0.000257509	-3.83418e-05	0	0	0.00032904	-0.000151325	0	0	0	0	0	8.02714e-05	0	0	0	6.29148e-05	0
msp_0618	Turicimonas muris	-7.17848e-05	0	0	0	-0.000180485	-5.282e-05	0	-7.07692e-05	-0.000224095	-3.98568e-05	0	-2.7204e-05	7.97987e-05	-0.00016493	-3.48764e-05	0	0	-0.000144642	0	0	5.3045e-05	0	-7.255e-05	0.000120236	0	0	3.76603e-05	0
msp_0619	unclassified	-7.38407e-05	0.00013235	0	-0.000205128	-0.0023447	0	0	0.00240876	-0.00025218	0.0010534	0.000855876	0.000146865	-0.000200298	-2.99202e-05	0.00033573	-0.00189148	-0.00311917	0.000188339	-0.000132371	0	0.000111169	0	0.000201257	0.000356255	-0.000200975	-0.000266307	0.00031647	-0.00134226
msp_0620	unclassified	0	5.69582e-05	0	0	0	0	0	0	0	-6.03484e-05	-0.00117682	5.921e-05	4.51223e-05	0	0	-8.67081e-05	0	0	0	0	0	0	0	0	0	-5.08434e-05	-3.37109e-05	0
msp_0621	Intestinibacter bartlettii	-0.00105331	-0.000675418	-0.00204349	0.000700244	0.00104099	-0.000678712	-0.000500691	0.000219636	-0.000948732	-0.00032753	0.000533302	-0.00461132	-0.00213894	-0.000999138	0.000695674	0.00220766	0.00296459	0.000818536	0.00819608	-0.000283117	3.9046e-05	0.00352361	-0.000631581	-0.00105156	-0.000335406	-0.00177362	-0.00165868	-0.0015446
msp_0622	unclassified Firmicutes	0.000246432	0.000259754	-0.000551565	-0.000224868	-0.00078495	-0.0017827	0.000394272	-0.000819364	-0.000156932	-0.000541604	0.000385375	-0.00310854	0.00149079	0.000254362	0.000570311	-0.000596956	-0.000554456	-0.00195714	0.00131578	0	0.000192691	-0.000930556	-0.00151283	-0.000625153	0.0010588	-0.000289241	-0.00170894	0.00182879
msp_0623	Coprobacillus sp. 8_1_38FAA	0.000297604	0.000182258	0.00034575	0	0.000193058	-0.000489734	0.000189101	0.000869691	0.00132885	-0.000449749	0.000398037	-0.00148329	0.000405895	-0.000491	-0.000428825	-0.000529735	0.000403225	-0.00018938	-0.00032551	-4.92412e-05	0	0	-0.000229035	-0.000221902	0	0.000101496	0.000370206	-0.000984087
msp_0624	unclassified Clostridiales	-0.000151613	6.10523e-05	0.00010306	0	0.000458208	0	0.000231473	0.000129496	4.44146e-05	0.000523277	-0.00145482	-0.000181513	0.001639	-8.78321e-05	-0.000768609	0.00249709	0.000510678	0.00020281	0.00162594	0	0	0	-0.000321188	0.000525352	0.000542904	-0.000223276	-0.000825917	0
msp_0625	Firmicutes bacterium CAG:646	6.85397e-05	0	0	0	-0.000585826	-0.000277935	0.000286601	-8.95939e-05	-0.000116906	0	1.73198e-05	0	0	0	1.40701e-05	0	7.73119e-05	0	0	0	0	0	0	-4.96655e-05	0	0	0	0
msp_0626	Citrobacter freundii	-0.000314871	7.96921e-05	0	0	-0.000446089	-0.000147733	0.000800858	0	0.000292593	0.000141129	-5.04569e-05	5.57595e-05	9.1298e-05	-0.000449279	0.00205225	0.000102851	-2.70878e-05	-5.50081e-05	-0.000101922	-8.35422e-05	-0.00126192	0	0	-0.00185368	-0.000152529	-4.70898e-05	0.000119367	0
msp_0627	Bifidobacterium breve	-0.000234499	0.000382183	0	0	7.86194e-05	6.98375e-05	0	0	-0.000152087	8.20245e-05	-2.0666e-05	-0.000140378	0	1.54111e-05	3.71025e-05	0	-7.3973e-05	-0.000256043	-0.0015656	0	0	0.00435417	0.000135162	0.00130978	-0.000185676	-0.000107524	0.000501581	0
msp_0628	unclassified Bacteroidales	0	2.23266e-05	0	0	0.000144294	0	0	0	0	0	1.24459e-05	0	-6.40737e-05	-2.9055e-05	0	5.5281e-05	0	2.45779e-05	0	0	0	0	0	0	-4.99554e-05	0	0	0
msp_0629	unclassified	2.68409e-05	0	-0.00189062	0	-0.000133453	0	0.00010715	0.00104613	0	0.00116062	-0.000421255	-0.000126064	-0.000146441	0	4.51352e-05	0.000202519	0.00113723	0	0	0	0	0	4.11085e-05	-5.49206e-05	0	-0.000110573	0.000184302	0
msp_0630	Eubacterium sp. CAG:161	-0.000449464	0.000183847	-0.000914972	0.000194255	-0.00056282	-0.00016932	-0.000365983	-0.000178795	-0.000633547	0.000378014	-0.00134635	-0.00152439	-0.000167448	-9.05814e-05	0.000156505	-0.000361188	0.000227254	-0.00121668	-0.00114717	0.000294734	0	0	0.000203392	0.000106363	0	-0.000267091	0.000767462	-0.00123835
msp_0631	unclassified Firmicutes	0.000696547	0.00131583	0	0	2.46981e-05	0	0	0.00255532	-9.17846e-06	8.11864e-05	-0.000213951	0.000102787	9.94207e-05	0	0	7.56191e-05	0.00011186	9.96147e-05	0	0	0	0	0.00073088	0	0	0.00030735	-0.000201858	0
msp_0632	unclassified Clostridiales	0.000277779	0.000394934	0	0	-0.000666873	0	0	-0.000275288	0	0.000397117	0.000519567	0.000459975	0.00343884	0	5.50071e-05	0.000484231	0.000562594	0	0	0	0	0	0.000309953	1.16106e-05	5.77532e-05	0.000384223	0.0014362	-0.000485766
msp_0633	Klebsiella michiganensis 1	0.000356001	6.74748e-05	0	0	0	-7.20928e-05	-9.4513e-05	0	3.5956e-05	0.000201404	-2.38501e-05	-4.69353e-05	0	0	-0.000239507	0.00106318	-4.3626e-05	0.000216305	0	0	-0.000531228	0	0.000270744	0.000142858	9.55164e-05	0.000138034	0.000740445	0.000134222
msp_0634	unclassified Flavonifractor	9.58794e-05	0.000330793	0	0	-0.000280746	1.84679e-05	0	0	2.24844e-05	-0.000137738	0.000215135	-0.000144809	0.000322932	-1.67064e-05	1.44595e-05	0.00103999	-0.0002255	0	-0.000109434	0	0	0.00102083	-0.000327568	0	0	5.23361e-05	9.0578e-05	0
msp_0635	unclassified	8.90287e-05	0	-0.000173025	0	0.000212628	0	-0.000102058	0	-0.000476532	0	-3.27227e-05	-0.000161153	4.40893e-05	-0.000176432	0.000359539	3.00141e-05	0	0	0.000119833	0	0	0	0	8.92347e-05	-0.000144169	8.15098e-05	3.5628e-05	0
msp_0636	Bacteroidales bacterium 55_9	-1.63241e-05	3.31489e-05	0.000109158	0	4.95016e-05	0	-7.8204e-05	0	-8.45226e-05	0	-0.000182812	-0.000133854	0.000109393	-1.72026e-05	0	0	0	0	-0.000496074	0	0	0	0	-0.000124515	0	0	-3.19258e-05	-0.000165707
msp_0637	Alistipes sp. Marseille-P2431	0	0	0	0	-0.000200376	0.000119473	-0.000850069	0	-0.000258716	0	-0.000108267	0	3.82819e-05	8.96283e-05	0.000328806	-3.62344e-05	-7.48183e-05	0.000165108	0	0	8.53235e-05	0	5.0003e-05	0.000440694	-0.000299019	0	0	0
msp_0638	unclassified Gordonibacter	-1.88501e-05	8.05157e-05	-0.000126545	0	0	0	0	0	0	0.000103182	-5.0488e-05	0.000150315	0	0	-3.70616e-05	0.000167876	-0.000133967	-5.27699e-05	0.000177058	0	0	0.002175	0	0	0	7.99554e-05	-8.75089e-05	0
msp_0639	Faecalibacterium prausnitzii 6	-0.000334353	-0.000108122	-0.00068057	0	-0.000566353	-8.68306e-05	9.44838e-05	-0.000340315	0.000150651	-0.00126502	-0.000484016	-0.000668312	0.00199698	-0.00013312	-0.00029962	0.000149361	0.000487881	-0.00106281	0.00207587	-0.000895166	-0.000238833	-0.0015625	-0.00561801	-5.98717e-05	-0.000185152	-0.00147209	0.000587527	-0.000206103
msp_0640	unclassified Oscillibacter	-6.14158e-05	0	0	0	0	0	-7.21231e-05	0.000303384	0	0	6.63018e-05	4.13794e-05	0.000218186	0	0	0	0.000114306	0	0	0	0	0	-0.000100597	1.0482e-05	0	0	0	0
msp_0641	unclassified Clostridiales	0.000180916	0	0	0	3.50161e-05	0	0	-0.000203307	-9.37346e-05	0.000234829	-0.00046845	-0.000119048	-5.27564e-05	0	1.6444e-05	-3.715e-05	-9.83728e-05	0	0.000701317	0	0	0	0.000169048	3.33014e-05	0	8.08179e-05	-0.000115549	0
msp_0642	Proteobacteria bacterium CAG:495	3.55723e-05	3.96956e-05	0	0	9.37762e-05	0	0	0	0	0	-3.55575e-05	-7.86634e-05	4.21688e-05	0	0	-0.00021006	3.67226e-05	0	0.000137518	0	0	0	-0.000563836	0	-5.90356e-05	6.32254e-05	-6.61493e-05	0
msp_0643	unclassified Clostridiales	2.04133e-05	2.21027e-05	0	0	-9.62031e-05	0	0	-0.000188717	8.22183e-05	0	-4.90295e-05	-0.000479441	9.59492e-05	-9.31509e-05	0.000226029	-0.000101949	9.13053e-05	-0.000153568	0	0	0.000231148	0	0	4.68787e-05	0.000102832	0	3.7318e-05	0
msp_0644	unclassified	1.28548e-05	3.1106e-05	0.000106872	0	-3.62964e-05	-3.73419e-05	0	0	0	0	-2.95795e-05	0	0	0	0.000149795	5.01808e-05	0	0	0	0	0	0	0.000174568	1.23658e-05	0	0	0	0
msp_0645	Clostridium sp. CAG:452	-4.21341e-05	-4.11447e-05	0	0	0.000270412	0	0.000112736	8.96081e-05	-3.74093e-05	0	-0.000137452	3.92777e-05	0	-9.73238e-06	-0.00106707	0.00069702	0	-5.51885e-05	-2.63283e-05	0	0	0	0	1.23038e-05	0.00013427	0.000105181	0	0
msp_0646	Bacteroides sp. 43_108	3.56425e-05	0	0	0	0	0	0.000148799	0	-5.02959e-05	-3.7768e-05	0	-3.35035e-05	0.000177354	0	0	0	0	0	0	0	0	0	-3.75932e-05	-8.9555e-06	0	0	0	0
msp_0647	Clostridia bacterium UC5.1-2E3	0.0032793	0.0011528	-0.00188006	0	0.000321255	0	0.00010423	0.00293961	0.000113125	0.000878148	0.000635423	0.000326398	0.00016669	0	4.76955e-05	0.00204996	-0.00038106	0.000166747	0.00218499	0	0	-0.0005	0.000559593	0.000256778	0	-0.00083266	0.00039433	0
msp_0648	Holdemanella biformis	0.000177283	0.000544265	-0.00021826	0	0.000784426	0.000108476	0.000478298	0	0.000333243	-0.000203464	-0.000945396	0.000167412	0.000162181	-0.000222534	-0.00121057	0.00281415	0.000929508	-0.00091216	-0.00173838	0.000108723	-0.000193431	0	7.93388e-05	-0.00028199	-0.000186124	0	8.01414e-05	0
msp_0649	unclassified Acidaminococcus	-6.71957e-05	-2.90919e-05	0	0	0	0.000165472	-0.000265463	0	-0.000501142	0	0	0	0	0	-6.1462e-05	0	0	-0.000483788	0	0	-0.000169883	0	0	0.000180369	4.93259e-05	5.21129e-05	0	0
msp_0650	unclassified Butyricicoccus	0.00032731	0.000129345	0.000277694	0	-0.00367214	-0.00221529	0.00182728	0.000600682	-0.00029014	-0.000233383	-0.000409816	0.000422336	0.00255554	-0.00225174	-0.00791383	-0.000309932	0.00105042	-0.00473391	0.000463213	-0.000133799	-0.00124659	0	-0.000837773	-0.00170385	0.000604534	-0.000349942	-0.00103471	-0.00056
msp_0651	unclassified Prevotella	7.13317e-05	0	0	0	0	0	7.7214e-05	0	-2.41073e-05	0	-3.11244e-05	0	0	0	0	0	0	0	0	0	0	0	2.96085e-05	1.34228e-05	0	0	0	0
msp_0652	unclassified	-8.90244e-05	-4.61087e-05	-0.000223896	0	-0.000542783	0	-6.51731e-05	-0.000103929	0.000101804	-0.000285205	-0.000735131	0.000351528	-0.000365152	-0.000127981	0.000169877	-0.00051777	0.000655135	4.61601e-05	0	0	2.37471e-05	0	-6.93919e-05	-6.16953e-05	0.000121137	0.000166337	0.000142255	-0.00211234
msp_0653	unclassified Muribaculaceae	9.11537e-05	0	0	0	4.03887e-05	0	0.00140777	0	0	0	-1.53214e-05	5.59313e-05	0	-0.000303786	2.09348e-05	0	0	-3.22289e-05	0	0	-0.00027006	0	8.02284e-05	-4.48191e-06	0	0	9.32008e-05	0
msp_0654	Firmicutes bacterium CAG:103	0.000271859	0.000161271	0.00136213	0	-0.000859098	-0.00105547	0.000185918	0.0049547	0.000471338	-0.000158369	0.00085585	0.000492649	0.0017586	-0.00111842	-0.00319956	0.00083152	0.000384351	-0.000596687	0.00116951	0	-0.000936326	0	-0.000184254	-0.00154422	-0.000770635	-0.000303221	0.00116872	0.000243704
msp_0655	Ruminococcus sp. 2789STDY5608817	0.000726872	-0.00076833	-0.0020357	0.000476923	-0.00104636	-0.00157669	0.000931439	-0.000857926	0.000682569	-0.00112588	0.000537094	-0.00339438	-0.00249758	-0.000657016	-0.00410679	-0.00148375	-0.00145937	0.000615711	0.000964116	0.00271734	-0.000264513	0	-0.00330956	0.0014752	0.000343845	-0.00316795	0.00206745	-0.000256444
msp_0656	Succinatimonas sp. CAG:777	0	0	0	0	0	0	0.000197956	0	2.28881e-05	0	0	-0.000418677	-0.000131888	0	0	0	0	0	-5.51279e-05	0	0	0	0	2.58333e-05	0.000996145	0	-9.16019e-05	0
msp_0657	unclassified	-0.000104647	-0.000122284	0	0	0.000141601	0	0	0	0	0.000954184	-0.000235297	0	0.000122731	0	8.87142e-05	0.000433543	5.763e-05	2.83909e-05	0	0	0	0	-0.000129273	0	0	-0.000197606	2.50156e-05	0
msp_0658	unclassified Bacteroides	0	0	0	0	0	0	0	0	0	0	2.61861e-05	0	0	0	0	0	0	0	0	0	0	0	0	0	0	0.000352972	0	0
msp_0659	Caecibacter massiliensis	-5.09794e-05	0	0	0	0	0	0	-0.000110833	1.14201e-05	0	-1.40566e-05	-5.33817e-05	0	0	0	0.000707291	0	-2.87766e-05	0	0	0	0	0	4.11659e-06	0	0	3.08657e-05	0
msp_0660	unclassified	-1.65809e-05	-1.89693e-05	0	0	-5.22757e-05	0	0	-0.000100319	0	0.000129112	-0.0010877	-6.25189e-05	0.000168928	0	0	0	0.000112484	0	0.000160358	0.00291051	0	0	0	0	0	-6.54381e-05	3.64991e-05	0
msp_0662	bacterium OL-1	0.000144037	0	0	0	-0.000190475	0	-0.000338624	0	-0.000410846	0	3.06258e-05	-5.68702e-05	-3.26913e-05	1.04241e-05	-0.000216231	0	-0.000167194	-0.000207856	0	0	0	0	0	0.000301987	-7.4006e-05	0.000812742	0	0
msp_0663	unclassified	0.00013605	-4.96248e-05	-0.00113426	0	1.92939e-05	0	0	0.000223827	0	0.000964363	0.000193267	0.000334533	0	0	7.21908e-05	0.000148452	-7.25227e-05	-6.94746e-05	0.000331447	7.64411e-05	0	0	-3.76892e-05	0	0	0	0.000319275	0
msp_0664	unclassified Clostridiales	-2.13925e-05	-1.79369e-05	0	0	0	0	-0.000111178	0	0.00019799	0	0	0	0	0.000105336	8.07871e-05	0	0	0	0	0	5.2388e-05	0	0	0.000111672	-0.000124662	0	0	0
msp_0665	unclassified Clostridiales	-0.000138818	0.000561662	-0.00450384	0	-0.00143935	0	0	0.000594687	2.86998e-05	0.000133295	-0.000507522	0.000178873	-0.000454028	0	0.000149705	-0.000177314	-0.000435092	-6.77008e-05	0.000126475	0	0	0	-0.000183229	2.45622e-05	-5.59647e-05	-0.000113809	-0.000133841	-0.000919682
msp_0666	unclassified Coriobacteriia	-1.15634e-05	0	0	0	-0.000135787	0	0	0	-1.1575e-05	-0.000202787	5.56191e-05	-3.85691e-05	0.000302532	3.56325e-05	4.28768e-05	0	0.000119267	0	0	0	0	0	-3.25575e-05	0	0	8.17946e-05	6.88868e-05	-0.000160556
msp_0667	unclassified Prevotellaceae	6.02357e-05	0	0	0	0	0	0	0	1.04691e-05	0	4.63491e-05	4.84261e-05	0	0	0	0.000169167	3.93244e-05	0	-0.000127924	0	4.15233e-05	0	0	1.44795e-05	-5.95001e-05	0	0	0
msp_0668	Coprococcus sp. CAG:782	0	0	0	0	0	0	0	0	0	-6.17584e-05	-0.000171856	0	0	-2.91609e-05	-0.000803558	0	-6.1227e-05	-2.49957e-05	0	0	0	0	0	4.7198e-05	-9.29932e-05	0	0	0
msp_0669	unclassified Clostridiales	-1.5491e-05	-2.98976e-05	0	0	-5.36546e-05	0	0	0	0	0.000268412	-7.12532e-05	0.000228059	0.000305614	-2.46137e-05	0	0	0.000139048	0	0.000695605	0	0	0	-3.88068e-05	9.53779e-06	0	0	0	0
msp_0670	unclassified Oscillibacter	-8.44384e-05	0.000174103	0	0	7.7958e-05	0	0	-0.000198375	0	0.000200706	0.000229959	6.6666e-05	3.57588e-05	0	3.47563e-05	6.93269e-05	-9.37092e-05	-2.75336e-05	-0.000381878	0	0	0	8.87958e-05	-3.74116e-05	0	0	-0.000211263	0
msp_0671	Turicibacter sanguinis 1	-0.000285696	-0.000109442	0	0	0.000558734	0	0.000262813	-0.000796156	0.000383153	0.00148767	-0.000188491	-0.00038429	-8.59603e-05	0.000390958	0.000314493	0.000533169	-0.00121971	0.000150835	0.00100376	0	0	-0.000578704	-0.000295692	-0.000308711	-3.62973e-05	4.99827e-05	0.000199765	0.000140593
msp_0672	unclassified Verrucomicrobia	-2.4369e-05	0	-0.000114286	0	0	0	0	0	0	5.28803e-05	-4.28757e-05	0.000118847	0.000376903	0	-1.82244e-05	0	0	0	0	0	0	0	-0.000198086	0	0	0	4.58852e-05	0
msp_0673	unclassified Firmicutes	0	0	-0.000364722	-0.0002151	0	0	0	0	0	0	-7.5366e-05	8.66405e-05	6.30399e-05	0	0	8.01267e-05	0	-0.000131764	7.60518e-05	0	0	0	0	4.86228e-05	0	0	0	0
msp_0674	Eubacterium sp. 2789STDY5834909	1.04831e-05	0	0	0	-0.000169564	-0.000109529	0.000995263	0	0.000457414	0	-0.000228163	-0.000100777	0.00047733	-3.15466e-05	0	0.000196086	-7.09388e-05	0	-0.000103641	0	0	0	0	-0.000385988	-0.000110056	0	0	0
msp_0675	Sutterella sp. CAG:521	0.000119968	0.000122765	0.00155806	0	-4.83479e-05	0.00015616	0	0	-0.000236178	0.000237755	-5.50718e-05	4.46797e-05	3.56026e-05	-8.64699e-05	2.60653e-05	0	0	7.04733e-05	0.000105862	0	0.000121878	0	0	2.76672e-05	0	0	-0.00035056	0
msp_0676	unclassified	1.42784e-05	0	0.000403441	0	-0.000762708	-3.2921e-05	0.000559191	-0.000333435	0	-0.000135537	-0.000412739	-0.000601604	-0.000140923	-7.65992e-05	-7.88078e-05	9.10813e-05	3.82252e-05	-0.000161555	0.000158698	0	0	0	-0.000133586	0.000908397	-6.47387e-05	-0.00017813	-0.000522051	-0.00310336
msp_0677c	Slackia exigua	0.000480508	-2.01322e-05	0	0	0	0	0	0	0	0.00175423	0	0.000148392	0	1.95758e-05	0	0.000488828	-2.25037e-05	0	4.15018e-05	0	0	0	7.61902e-05	7.17802e-05	0	3.5679e-05	0.000273808	0
msp_0678	unclassified Clostridiales	-9.5023e-06	-2.08757e-05	0.000111963	0	0	0	0	-6.83943e-05	0	0	0	9.75635e-05	0.000353106	0	0	0.000226152	4.25419e-05	0	-0.000140657	0	0	0	0	0	0	0	9.46341e-05	0
msp_0679	unclassified	7.10049e-05	0.000152544	-0.00118623	0	-0.00656061	0	0.000667666	0.000132803	-7.96034e-05	-6.15846e-05	-0.000428192	-0.000964766	-0.000298473	-7.95139e-05	-0.000397801	-0.000377374	-0.000245643	-0.000352036	-0.000185495	-0.00017501	7.48034e-05	0	-0.000191318	-6.00216e-05	-4.30766e-05	0.000149142	-0.000391291	0.000231538
msp_0680c	Bacteroidales bacterium H1	-1.13913e-05	0	0	0	0	0	0	0	0	0	-5.10009e-05	-7.59979e-05	0	0	0	0	0	0	0	0	0	0	0	0	0	0	0	0
msp_0681	Prevotella sp. CAG:617	0	0	0	0	0	0	0	0	-3.44954e-05	0	-8.93011e-05	-7.47182e-05	6.80431e-05	6.2316e-05	-2.75911e-05	0	0	7.30157e-05	0	0	0	0	0	0	0	0	0	0
msp_0682	unclassified Firmicutes	1.11618e-05	0	0	0	-0.000105391	0	7.70226e-05	0	1.68986e-05	0.000103327	-0.000694512	8.70053e-05	-3.54306e-05	0	0	0.000314313	0	0	4.96968e-05	0	0	0	0	0	0	0	-6.67082e-05	0
msp_0683	unclassified	1.887e-05	0	0	0	-0.000198234	0	0.000360175	0	0	0	0.000505306	-0.000137921	-5.5802e-05	0	0	4.26624e-05	-3.15664e-05	0	0	0	0	0	0	0	0	0	0	0
msp_0684	unclassified Muribaculaceae	0	0	0	0	0	0	0	0	0	0	-1.1552e-05	0	3.92039e-05	0	0	0	0	0	0	0	0	0	0	0	0	0	0	0
msp_0685	unclassified Clostridiales	-4.7672e-05	1.54664e-05	0.000124698	0	-0.000507611	0	0.000156527	0.000589517	8.94153e-05	0	0.000293412	-0.00251609	-0.000270965	-6.48575e-05	-6.01008e-05	0.00153295	0.000340667	-9.49623e-05	0	0	0	0	-0.000236881	3.88927e-05	0	0	8.13485e-05	0.000237919
msp_0686	Ruminococcus sp. CAG:382	0	0	0	0	-2.16407e-05	0	0	0	0	0.000206611	-0.000109302	0	0.000256876	-2.51869e-05	0	0.000110908	0	0	-0.000102125	0	0	0	0.000114087	0.000183951	-4.57798e-05	0	0	-0.000396667
msp_0687	Prevotella sp. UBA630	4.74258e-05	8.53027e-05	0	0	0	0	0	8.73063e-05	-0.000129491	0	-6.58435e-05	3.08184e-05	0	0	0	0	0	0	0	0	0	0	0	0	0	0	0	0
msp_0688	unclassified Lachnospiraceae	0	0	-0.000344728	0	-0.000362736	0	0	8.44183e-05	0	0.000750564	-0.00037116	0	0.000143327	0	2.72589e-05	0	5.27949e-05	2.69047e-05	0.000110504	0	0	0	-0.000104144	0	0	-4.55017e-05	0	-0.000311153
msp_0689	unclassified Clostridiales	-1.82766e-05	0	0	0	-0.00015573	0	0	0	0	0	0	0	0	0	0	0	0	0	0	0	0	0	0.00026559	0	0	-0.000204556	0.000206196	0.000229938
msp_0690	unclassified Faecalibacterium	9.35499e-06	0	0	0	0.000126505	-0.000147316	0	0	0	0	1.27181e-05	4.83121e-05	0	0	0	-6.84544e-05	0.000138875	0	0	0	0	0	0	0	0	-3.85132e-05	-4.88987e-05	0
msp_0691	Lactobacillus amylovorus	8.34318e-05	0	-0.000677982	0	0	0	0	0	0.00112974	0	0	0	0	0	5.75918e-05	6.7597e-05	-0.000193914	0	0	0	0	0	0	0.000815102	0	0	2.87868e-05	0
msp_0692	unclassified	1.14001e-05	0	-0.000302566	0	9.30425e-05	0	0	0.000273799	8.32948e-05	0	-0.000336486	0.000100943	-0.000368379	-0.000220222	-0.000504092	0.000133251	4.44814e-05	5.33107e-05	0.000160013	0	0.000315669	0	0	9.69994e-05	0	6.22979e-05	0	0
msp_0693	unclassified Clostridiales	0.000662024	-0.000304515	0.000128862	0	-0.00069814	-6.68467e-05	0.00301127	-5.76765e-05	0.000414569	0	-0.000297473	-7.73985e-05	-4.65387e-05	-0.000984983	0.000599993	0	0	-0.000587468	8.0645e-05	0	0	0	4.46693e-05	0.000677456	0.000283416	0	0	-0.00136034
msp_0694	unclassified Parabacteroides	0	0	0	0	0.000115685	0	0	0	8.69805e-06	7.32043e-05	-2.82552e-05	2.59909e-05	0	0	-6.26109e-05	3.36542e-05	0	0	0	0	0	0	0	0	0	0	0	0
msp_0695	unclassified Alphaproteobacteria	0	0	-0.000118037	0	0	0	0	0	0	0	-9.51141e-05	-7.13683e-05	0	0	0	0	0	0	0	0	0	0	3.21846e-05	0	0	0	0	0
msp_0696	Acidaminococcus fermentans	2.89896e-05	0.000495672	0	0	3.61931e-05	0	0	0	-0.000123838	0	3.46204e-05	0.000120889	-0.000177384	0	-4.49437e-05	7.42079e-05	-0.00017745	0	0	0	0	0	0	5.42739e-05	0	-0.000196197	0.000117393	0
msp_0697	Clostridium sp. CAG:221	0.000121021	-2.22151e-05	0	0	8.3681e-05	-0.00011966	0.00013249	0	-0.000418599	-0.00014394	-0.000157739	-0.00137923	-0.00155138	-0.000311473	0.00236202	0.000250066	-0.000511731	-0.000383162	0.000484677	0	4.52786e-05	-0.000479167	0	-0.000228211	0.000184849	-0.000146463	-0.000203115	-0.000400444
msp_0698	Faecalitalea cylindroides	0.00024723	2.17046e-05	0	0	0.000536739	-5.31616e-05	-0.000273889	-0.000299564	-0.000158974	-0.000236627	-0.000225312	-0.000448734	0.00168784	1.10197e-05	-0.000267218	-0.00010945	-7.45148e-05	0.00055306	0.00133341	0	0	0	-9.36217e-05	0.000112423	0	-0.00010824	9.91198e-05	0
msp_0699	unclassified Firmicutes	-7.24384e-05	0.00119647	0	0	-0.000826976	0	0.000148997	-0.000191468	-2.33975e-05	0	-0.00016897	-0.000443767	0.000489568	0	0	-0.000526442	-0.00129794	2.89111e-05	-0.000148712	0	0	0	-0.000197304	0	0	-3.30028e-05	0.000520152	0.00134409
msp_0700	Megasphaera sp. ASD88	1.0338e-05	-1.47286e-05	0	0	0	0.000307645	0	0	0.000166399	0	0	0	0	0	0	0	0	0	0	0	0	0	0	2.96269e-05	0	-3.9223e-05	-3.18172e-05	0
msp_0701	unclassified Clostridiales	0	0.000205716	0	0	0	0	0	0	0	0	0.000134283	-1.91389e-05	0	0	0	0	3.11915e-05	0	0	0	0	0	4.36919e-05	0	0	0	0	0
msp_0702	unclassified Bacteroidales	0	0	0	0	0	0	0	0	0	0	0	0	0	0	0	0	0	0	7.34415e-05	0	0	0	0	0	0	0	0	0
msp_0703	unclassified	0	0	0	0	0	0	0.000103108	-0.000170725	3.72336e-05	0	-0.000256682	-0.000612064	-7.98342e-05	-3.88075e-05	-0.000110166	6.06335e-05	0.000174953	0	-4.72068e-05	0	0	0	0	0	-5.83393e-05	5.36962e-05	0	0
msp_0704	unclassified Clostridiales	0	0	0	0	0	0	0	0	0	0.000281571	-5.38647e-05	0.000132743	0	0	0	0.000105791	3.78495e-05	0	0	0	0	0	0	0	0	0	-0.000190625	0
msp_0705	unclassified Lachnospiraceae	-0.000564766	0.000206481	-0.000405124	0	0	-0.00164854	-0.000608931	0	-0.00128264	0	-0.000328925	0	0	-0.000809109	0.000821036	0.000114611	0.000238358	-0.00134662	-0.000322308	0.000598589	0.000401582	0	3.56674e-05	-0.00210802	0.000866297	-0.00012384	-3.81576e-05	-0.000337778
msp_0706	unclassified Dorea	5.89107e-05	0	0	0	-0.000172769	0.000202568	0	0	-0.000131967	0.00013136	0.000147323	0	0.000313639	9.5609e-05	-0.000100575	0	0.000124295	-0.000108212	0	-5.88008e-05	0	0	-3.90102e-05	7.19774e-05	0	-8.69127e-05	-7.69772e-05	0
msp_0707	unclassified Firmicutes	0.000122868	0.0001636	0.000369198	0	-0.000286031	0	0.000891718	0.00173637	-6.42533e-05	0.00174482	0.000268536	0.000471039	0.00034107	3.2671e-05	-4.20441e-05	0.000233802	0.000194969	-0.000404448	0.000233338	0	5.87701e-05	0	0.00204802	3.8447e-05	0	-0.000656064	0.000480278	0.00026
msp_0708	Ruminococcus sp. CAG:563	0	4.41546e-05	0	0	-3.7887e-05	0	0.000216846	0	0	0	-3.10751e-05	0	0	0	3.16089e-05	0	0	0	0	0	0	0	0	-9.54737e-06	0	0	0	0.000683481
msp_0709	Firmicutes bacterium CAG:341	0.000112679	-0.000111105	0.000150131	0	8.8466e-05	-0.000296068	0.00182057	0	-0.000559554	0	-0.00100047	-0.000335425	-0.000615096	0.000210391	-0.00105832	0.000525457	0.00123104	-6.51209e-05	0	0	-0.000191325	0	0.000181348	-0.000266393	0.000242094	0.000262328	5.8457e-05	0
msp_0710	Bacteroides sp. CAG:927	0	0	0	0	0	0	0	-8.14529e-05	0	0	1.28731e-05	0	0.000297332	0	0	0	0	0	0	0	0	0	0	1.65721e-05	0	0	2.7895e-05	0
msp_0711c	Rikenella microfusus	-1.04227e-05	0	0	0	-3.24326e-05	0	0	0	0	0	-2.18529e-05	0	0	0	0	9.30076e-05	0.000129328	0	0	0	0	0	0	0	0	0	-4.76181e-05	0
msp_0712	Lactobacillus salivarius	0.000152337	0.00022078	0	0	-4.22917e-05	0.000259604	-0.000166891	0.000158493	0.0036247	0	-6.54716e-05	0.000227864	0.00054583	0.00939443	0.00117578	0.000104542	-0.000654773	0.000486911	0	0.000296699	0	0	0	0.00108203	-0.00144802	0	0	0
msp_0713	Clostridium citroniae	0.000878057	0.000665206	0	0.00444043	0.00117218	0.000856047	-0.00207537	0.000221356	0.000984671	-0.000338538	-0.000731589	0.000595113	0.000829262	0.000508505	-0.000592069	0.00123532	-0.000775256	0.00577276	0.000794469	5.06353e-05	-0.0032312	-0.00170833	0.00123717	0.00232014	0.00121294	-0.00140824	-0.000499956	-0.00407508
msp_0714c	Selenomonas bovis	0	0	0	0	0	0	0	0	0	0	0	0	0	0	0	0	0	0	0	0	0	0	0	0	0	0	0	0
msp_0715c	Aggregatibacter segnis	0.000280077	0.000117666	0	0	0	0.000439542	-6.18247e-05	0	-0.000121425	4.75822e-05	0	0	0	0.0053383	-0.000150089	0	0	0.000206605	0.000129764	0	0	0	0	-9.4728e-05	0	0.000309697	0	0
msp_0716	unclassified	-7.6158e-05	0.000250694	0	0	-0.00203795	0	7.24381e-05	0.000402559	9.62674e-05	0	-0.000990201	-0.00111293	-0.00154486	5.075e-05	0.000276749	2.79024e-05	0.000229909	-0.00106298	3.95075e-05	0	0	0	5.01672e-05	0.000144628	0.000845974	0.000632299	0.000634893	0
msp_0717	unclassified Ruminococcus	2.61579e-05	0	0	0	0	0	0	0	0.000201797	0	8.9713e-05	-2.87064e-05	-4.48581e-05	-9.9978e-06	8.55198e-05	0	0	2.81839e-05	0	0	-8.01319e-05	0	-0.000118464	7.07792e-05	-5.30512e-05	0	3.57006e-05	0
msp_0718	unclassified Alphaproteobacteria	0	0	0	0	0	0	0.00088271	0	0	0	0	0	0	0	-1.40112e-05	0	0	2.76065e-05	0	0	0	0	0	0	0	0	0	0
msp_0719	unclassified	-7.73908e-05	5.02072e-05	-0.000244451	0	-9.28842e-05	0	0.000452003	-0.000197435	-1.95318e-05	0.00142339	-0.000225684	-7.74303e-05	0.000285715	0	0.000197277	-0.000210034	0	0	-3.69992e-05	0	0	0	-0.000438629	3.49903e-05	0.000114989	0	0.000117112	0.0013966
msp_0720	Clostridium sp. CAG:1024	0	0	0	0	0	0	0	0	1.49807e-05	0	-1.07077e-05	0	0	0	0	-4.18048e-05	0	0	0	0	0	0	0	0	-4.41393e-05	0	0	-0.000368422
msp_0721	unclassified Bacteroides	0	0	0	0	0	0	0	0	0	0	0	-2.48036e-05	3.32618e-05	0	0	0	0	0	0	0	0	0	0	0	0	0	0	0
msp_0722	Blautia sp. Marseille-P3087	0.00286352	0.000544967	-0.00112701	-0.00414981	0.00471645	-0.0061521	0.00183219	-0.0015107	-0.000625151	-0.000178035	-0.000877938	-0.000548143	0.00116001	0.000594112	-0.000836878	-0.000264325	-0.000973177	0.000634194	0.000650622	0.000377114	0.000122434	-0.0005625	-0.00596556	-0.00328582	0.000691908	-0.00360181	-0.000599887	0.0023479
msp_0723	unclassified Firmicutes	-0.000120511	-6.50703e-05	-0.00251293	0	-0.000680697	0	7.73883e-05	0.00112565	7.89738e-06	-0.000303774	-0.000823177	0.000645626	0.000563464	-5.53977e-05	0.000178894	-0.000257407	-0.000597316	6.08253e-05	-0.00150118	0	0	0	-0.000192104	0.000110868	0	0.000160957	0.000578386	-0.000635132
msp_0724	unclassified Burkholderiales	1.15696e-05	0	0	0	0.000107894	0	0	0	0	0	-0.000627271	0	0.000231974	0	5.8483e-05	0	0	0	0	0	0	0	0	0.000113654	-6.29713e-05	8.53444e-05	0	0
msp_0725	unclassified Clostridiales	0	0.000439933	-0.000228049	0	-0.000125316	0	0	0.000348494	0	4.64607e-05	-0.000156439	-0.000127466	0	0	0	-0.000125177	-0.000111083	0	0	0	0	0	0.000392767	0	0	-0.000103996	0.00015744	0
msp_0726	Prevotella sp. CAG:755	0	0	0	0	0	0	0	0	0	0	-1.55027e-05	0.00010782	0	0	0	-3.47306e-05	0	0	0	0	0	0	0	0	0	0	-6.28952e-05	0
msp_0727	unclassified Anaerotruncus	0	0	0	0	0	0	0	0	0	0	-4.65222e-05	-4.86168e-05	-4.65866e-05	0	0	0	0	0	0	0	0	0	0	0	0	0	0	0
msp_0728	unclassified	-4.05843e-05	5.58609e-05	0	0	-0.000131071	0	0	0.00100871	0	0	-0.000819117	3.247e-05	-0.000142325	0	0	0.000385011	0	0	-8.19176e-05	0	0	0	-0.000145102	0	0	-4.37667e-05	0.000341458	0
msp_0729	unclassified Firmicutes	0	0.000122706	-8.76607e-05	0	-0.000366316	0	8.1424e-05	-0.000309239	2.22239e-05	0.000226497	0.000144944	0.000149711	0.000136425	-1.35415e-05	0.000355437	0.00032457	-5.38394e-05	-4.80341e-05	0	0	0	0	-3.87133e-05	3.05308e-05	-0.000400533	4.72887e-05	0	0
msp_0730	unclassified	0	0	0	0	0	0	0	0	0	0.000122496	-0.00113335	0.000103484	0	0	0	-9.52696e-05	0	0	0	0	0	0	0	0	0	0	0	0
msp_0732	unclassified Firmicutes	0.000142808	0.000173733	0	0	-0.00140324	0	0.000346126	0.000343378	1.06247e-05	0.000759971	-0.000125925	0.000236102	0.000288535	0	-3.51538e-05	0	0.000171279	0.00031945	-4.48545e-05	0.000418841	0	0	0.000305213	-5.73616e-05	0	-0.000138889	-4.87732e-05	0.000672042
msp_0733	Roseburia sp. CAG:471	0.000584935	0.000362055	-0.000250175	0	0.000161052	0	0.00472065	0	0.000170744	-0.000187812	9.26578e-05	-0.000667448	0	0.000141556	-0.000574271	0.00113081	0.000299191	-0.000237499	-0.000252705	0	-0.000186352	0	-5.20716e-05	-0.00029655	-0.000170995	-0.000251598	-0.000282055	-0.0032931
msp_0734	Firmicutes bacterium CAG:555	0	0	0.000104546	0	6.05874e-05	0	0	0	0	0	-0.00033999	2.51237e-05	0	0	0	0.000245387	0	0	0	0	0	0	-5.41866e-05	0	0	0	0	0
msp_0735	unclassified Firmicutes	-0.000110173	8.00537e-05	-0.000156406	0	0.000538034	0	0.0001997	6.64075e-05	3.06235e-05	-5.68427e-05	0.000197777	0.000215983	0.000644868	4.31949e-05	-9.6094e-05	-0.000471663	-0.00142154	-0.000295802	0.000254082	0	6.49996e-05	0	0.00148614	0.000247546	-4.89745e-05	0	0.000248711	0
msp_0736c	Bacteroides sp. An322	0	0	0	0	0	0	0	0	0	0	0	0	0	0	0	0	0	0	0	0	0	0	0	0	0	0	0	0
msp_0737	unclassified Clostridiales	-0.000331603	0.000268407	0.000114658	-0.000314408	0.00120162	0	0	0.000296568	-2.37189e-05	0.000417434	9.95967e-05	0.000225905	-0.000311478	0	4.97381e-05	0.00191742	0.000578438	0.000552882	0.00110767	0	0	-0.0005	7.8804e-05	0	0.000142632	-0.000184922	0.000374337	0
msp_0738	unclassified Prevotella	0	0	0	0	0	0	0	0	0	0	1.75923e-05	-4.95157e-05	0	0	3.43065e-05	0	0	0	0	0	0	0	0	0	0	0	-6.04316e-05	0
msp_0739c	Prevotella timonensis	-3.78411e-05	0	-0.00031296	0	0	-4.91986e-05	0	-0.000224534	0.000126023	0	-2.23341e-05	-5.10904e-05	0	-0.000392232	-0.00179403	0	0.000301108	0.000154034	0.000176826	0	0	0.000429167	-0.000636382	0.000269358	0	0.000134234	0	0
msp_0740	unclassified Clostridiales	0.00252269	0.00077047	0.000205865	0.00382607	-0.000613684	-0.000246727	-0.000122876	0	0.000137561	0	0.000127553	-4.08414e-05	0.00242326	-0.000261058	-7.93004e-05	0.000192626	0.000160778	-0.000227131	-0.000104147	0	-0.000197839	0.000288194	-0.0026102	0.000113843	-3.68818e-05	-0.000586202	-0.00020891	0
msp_0741	unclassified Burkholderiales	-1.79501e-05	0	-0.000592069	0	0	0	0	0	0	0	-0.000132393	3.96466e-05	6.87183e-05	0	0	0	0	0	0	0	0	0	0	0	0	0	0	0
msp_0742	Streptococcus parasanguinis	-0.00111679	-0.000885918	-0.00487244	-0.000392256	0.00162941	-0.00017864	0.00129507	-0.000271697	0.00425492	0.000267383	-0.00159149	-0.00181643	-0.00136871	0.0104746	0.00055821	-0.00065046	-0.00251876	0.000891296	0.00059222	-0.000625028	3.48171e-05	-0.00145	0.000510526	-0.000907388	-0.000642149	0.00113366	0.000819573	-0.00115947
msp_0743	unclassified Bacteroidetes	0	7.90533e-05	0	0	0	0	0	0	0	0	0	0	0	0	0	0	0	0	0	0	0	0	0	0	0	0	0	0
msp_0744	Acidaminococcus sp. CAG:542	3.46935e-05	0.000268887	0.000341072	0	0	0	0	-5.51561e-05	-0.000285824	0	0	-0.000539982	0.000387787	0	-0.000109391	0	0	0	0	0	0	0	0	0.000218221	0	0	0	0
msp_0745	unclassified Lachnospiraceae	6.16256e-05	0.000121774	-0.0010144	0	-0.000274442	-7.23794e-05	0.000135427	6.52327e-05	-5.19374e-05	0	-1.4694e-05	0	0	5.88707e-05	-2.27401e-05	0	0	2.90369e-05	0	0	-0.000356769	0	3.44341e-05	0.000106795	-3.93621e-05	0	0	0
msp_0746	unclassified Prevotella	-4.62482e-05	0	0	0	0	0	0	0	-5.02624e-05	0	0	0	0	0	6.90372e-05	0	0	2.76693e-05	0	0	0	0	0	0	0	0	0	0
msp_0747	unclassified Firmicutes	0.00015334	0	-0.00235345	-0.000301994	-0.00199866	0	0.000105347	0.00040847	0.000180061	0	-0.0014496	-0.0001954	9.53446e-05	0	-0.00013745	-0.000277857	-0.000125698	2.92504e-05	0.000210193	0	-0.000248983	0	-3.03176e-05	-6.64771e-05	0	0.000432886	2.4471e-05	-0.000183369
msp_0748	Firmicutes bacterium CAG:460	0	0	-0.0017351	0	0	0	0	0	0	-0.000145701	-0.00182253	-0.000132545	-0.000344665	0	0	0.000709134	7.57969e-05	0	-0.0001903	0	0	0	0	0	-3.59724e-05	0	0	0
msp_0749	unclassified Proteobacteria	4.64385e-05	0	8.00074e-05	0	0	5.99365e-05	0	0	-0.000754671	5.04318e-05	0	0.000101606	7.91464e-05	-0.00020696	-4.56018e-05	0	0	-0.000245987	0	0	-0.00264147	0	0	0.000512942	0	5.7367e-05	0	0
msp_0750	unclassified Lachnoclostridium	0	-1.7348e-05	0	0	-7.19878e-05	0	0	0.00012951	0	-4.43331e-05	-4.83515e-05	0	7.14038e-05	1.47927e-05	0	0.000141459	0	-2.43285e-05	0	0.000281812	-0.00041399	0	0.000149531	9.24825e-06	9.99834e-05	0	7.58474e-05	-0.00132229
msp_0751	unclassified Firmicutes	6.10754e-05	8.19504e-05	0	0	9.91518e-05	0	0.000153221	0.000371063	-1.03046e-05	0	-7.80963e-05	-8.81655e-05	5.07321e-05	-6.19911e-05	-0.000126263	-0.000104214	8.88596e-05	-3.15403e-05	0	0	0	0	0	0.000192016	0	7.53967e-05	-0.000206699	-0.000655667
msp_0752	Ruminococcus sp. CAG:624	0	0	0	0	0	0	0	0	0	0	0	0	0	0	0	0	0	0	0	0	0	0	0	0	0	0	6.52908e-05	0
msp_0753	unclassified Muribaculaceae	0	0	0	0	0	0	0	0	-1.83324e-05	0	-3.89127e-05	-9.91629e-05	0.000112221	0	0	8.4104e-05	0.000112704	5.04557e-05	0	0	0	0	-0.00116143	3.13895e-05	0	0	0	0
msp_0754c	Citrobacter werkmanii	0	0	0	0	0	0	0	0	-0.000222652	0	-2.12834e-05	0	0	0	-5.64972e-05	0	0	0	0	0	-0.000368307	0	0	-0.000134616	0	0	0	0
msp_0755c	unclassified Firmicutes	0	0	0	0	0	0	0	0	0	0	-2.92383e-05	0	0	0	0	-2.65066e-05	0	0	0	0	0	0	0	0	0	0	0	0
msp_0756	unclassified Blautia	-0.000177841	0.00123567	0	0	0.000296578	0	0	0.000204079	-4.65391e-05	-0.000194851	-0.000470045	-0.000344404	0.000541883	0.000140688	0.00131298	0.000157488	-0.00013733	-0.00041599	0.000572855	0	0	0	-0.000802359	0.000906103	0.00136869	-0.000863895	-0.00199438	0
msp_0757	Clostridium sp. 28_12	-4.10973e-05	6.63615e-05	-0.000842553	0	-0.00191632	0	0	0.000393565	-5.41018e-05	0	-0.000770711	-0.000114113	-0.000208285	-0.000122377	-0.000170106	-0.000614464	5.71974e-05	8.30143e-05	0.000119878	0	-0.000136166	0	-5.20194e-05	0.000289068	8.96873e-05	0	-6.69305e-05	0
msp_0758	unclassified Lachnospiraceae	4.52446e-05	-1.58065e-05	0	0	6.02798e-05	5.22173e-05	0	0	1.53725e-05	0	0	0	0	0	0	0	-2.11484e-05	2.69182e-05	0	0	0	0	-7.92981e-05	1.16339e-05	-5.45946e-05	0	0	0
msp_0759	unclassified Firmicutes	-1.15058e-05	5.49662e-05	0	0	5.9574e-05	0	0	0	0	0.000274456	-0.00141257	4.09322e-05	-7.13076e-05	3.21117e-05	0	-0.000116673	0.000766315	-2.62054e-05	9.26216e-05	0	0	0	0.000215577	0	0	0	0.000590837	0
msp_0760	Clostridium sp. 29_15	7.34735e-05	0	0.0001273	-0.000564103	-0.000293048	-0.000449311	-0.000138331	0.000120484	0.000147242	-0.000165532	0.000111225	-0.000648965	0.00029639	0.000257498	0.000505073	-0.000472061	-0.000401709	-6.55617e-05	0.000111274	0	0	0	0	0.000338269	-0.000127565	0	0.000140311	0
msp_0761	unclassified Clostridiales	-4.35358e-05	-5.4884e-05	-0.000277168	0	0.000156448	0	0.000142458	0.00226309	3.59151e-05	0.00491236	-0.000240178	-0.000420049	0.000647607	-6.40788e-05	-0.000680405	0.000510168	0.000698681	-0.000298417	-0.000503289	0	0	0	-0.000182621	0.00012097	0.000255592	0.000394933	0.000362889	0.00170749
msp_0762	Clostridium sp. CAG:678	0	0	-0.000239112	0	0	0	0	0	0	0	-0.000170186	0	0	0	0	0	0	0	0.000112042	0	0	0.00170833	0	0	0	0	0	0
msp_0763	Oscillibacter sp. ER4	0.000627664	0.00074422	-0.000650887	-0.00512119	0.000260154	-0.00348461	7.94617e-05	-0.000576557	-0.000882621	-0.000416748	0.00233304	0.000590686	0.00080581	-0.000992438	-0.00101615	0.000720565	0.00250066	-0.000464338	-0.00152658	-0.00158461	0.00114575	-0.00167917	-0.00105857	0.000773217	-0.000792843	-0.00176161	0.00114025	0.000305576
msp_0764	unclassified Bacteroidales	1.24554e-05	1.86968e-05	0	0	-7.28952e-05	-0.000165184	-7.42677e-05	0	-0.000207965	0	2.60183e-05	2.39994e-05	0.000766646	0.000120386	0.00022111	4.12321e-05	0	-0.000144249	-4.5179e-05	0	0	0	0.000108368	-0.00033012	0.00400541	0.000171956	0.000802953	0
msp_0765	unclassified Prevotellaceae	9.86169e-05	0	0	0	0	0	0	0	0	0	0	-5.25203e-05	0	0.00059249	-1.50759e-05	4.93739e-05	5.62916e-05	-3.29259e-05	0	0	-0.000899355	0	2.76624e-05	0.000170231	-0.000275103	0	0	0
msp_0766	unclassified Oscillibacter	-0.000229353	0.000755269	0.000554522	0.00164639	-0.000360063	0	-9.57667e-05	-0.00047956	-0.000605246	-0.000948656	0.00045186	-0.000318857	-0.000542622	4.80332e-05	-0.0001301	0.000531106	0.00018776	0.000139987	0.00167041	0.00407507	4.26607e-05	0	-0.000480793	-0.000246632	0.00191245	-0.00162365	-0.000978587	0.00160797
msp_0767	unclassified Lachnospiraceae	0.00191511	1.22647e-05	0	0.000880579	-0.000114577	-0.000687712	0	0	-0.000507612	5.30914e-05	-3.44056e-05	5.33031e-05	0.00077038	0.000270837	0.00130833	0	4.67043e-05	-0.000117419	0.000243599	-5.26316e-05	0.000675902	0.00155208	0.000264333	-0.000390669	0.00011563	0.000143192	0	0
msp_0768	unclassified	-0.000139554	0	0	0	-6.42335e-05	-0.000106689	0	0	5.3629e-05	0	9.9828e-05	0	0	9.99855e-05	-3.72224e-05	0	0	0	6.39559e-05	0.000209202	0	0	6.87639e-05	6.85668e-05	0	-3.5567e-05	0	0
msp_0769	Butyricicoccus sp. N15.MGS-46	0.00291118	0.00087971	0.00200915	-0.00152979	-0.00137403	-0.00951839	-0.000799708	0.000811683	-0.00131987	-0.000342543	0.000978487	-0.00116495	0.000468979	-0.00185623	0.00189446	-0.000518748	-0.00198396	-0.00185354	-0.00248472	-0.003806	0.00040609	0.000763889	-0.00594888	-0.00348185	-0.00152444	0.00197584	0.000833993	0.00099909
msp_0770	unclassified Clostridiales	0.000503404	0.00042406	0	0	0	0	0	0	-0.000117831	0	0	0	0	-2.1098e-05	5.47406e-05	0	0	6.06583e-05	-0.000253895	0	0	0	0	7.35183e-05	0.000257702	-0.000166453	-9.40344e-05	0
msp_0771	Clostridiales bacterium UBA644	0	0	-0.000114652	0	0	0	0	0	-4.1451e-05	0	-9.40383e-05	-2.40661e-05	0	0	0	0	7.04169e-05	0	-0.000227788	0	0	0	0	-9.34393e-06	0	0.000219583	9.59596e-05	0
msp_0772	Clostridiales bacterium 1_7_47FAA	0.000137473	0.000128689	-0.0010575	0	0.000418487	0.000455073	-0.000424564	0.000302767	-0.000386617	0	-0.00171987	-0.000232932	0	6.81279e-05	6.00738e-05	0.000186002	0	0.0013849	0.00010777	0	0	0	0.000398757	-0.000387526	0	7.36427e-05	0.000234339	-0.00566385
msp_0773	unclassified Firmicutes	5.62422e-05	-2.64922e-05	-0.00241672	-0.000255698	-0.00049989	0	0	-0.000910691	-5.15296e-05	0.00115872	-0.000710938	-0.000413758	-5.88604e-05	5.98803e-05	0.000102979	0.00118335	-3.06445e-05	-0.00011053	0.000724206	0	0	0	0	4.7456e-05	-5.03562e-05	0.000227499	0.000924983	0
msp_0774	Prevotella sp. CAG:1058	9.14443e-05	0	0	0	0	0	0	0	1.11538e-05	0	1.43897e-05	0	0	0	0	0	0	0	0	0	0	0	0	-1.04785e-05	-7.43295e-05	-4.49649e-05	-7.44549e-05	0
msp_0775	unclassified	0	0	0	0	-0.00033254	0	0	0	0	-9.33783e-05	-0.000327179	1.7051e-05	0	0	0	-2.72471e-05	0	0	0	0	0	0	0	0	0	0	4.34284e-05	0
msp_0776	unclassified Clostridiales	-1.2695e-05	-2.1444e-05	0.000167769	0	-0.000166601	0	0	0	7.80167e-05	0	-0.0010448	-0.00196013	-0.000677675	0	-3.97457e-05	0.000272954	-9.32234e-05	-6.95957e-05	0	0	0	0	3.5388e-05	3.42012e-05	-0.000197147	7.49517e-05	0.00215463	0.00155924
msp_0777	Firmicutes bacterium CAG:129	0.000367129	-0.000135907	0.00071656	0	-0.000755098	-0.000357352	0.00119074	-0.000444283	-0.00015186	0.000918988	-0.000225886	0.00107728	0.000447798	-0.000675917	-0.000657809	0.00195392	0.000697413	0.00033099	0.000537051	0	-0.000397937	-0.000520833	-0.00222204	0.00016307	0.00106421	0.000833406	0.000584403	0.000813395
msp_0778	unclassified Faecalibacterium	0	0	0	0	0	0	0	0.000159013	0	0	-5.55317e-05	0	0	0	0	0	0	0	0	0	0	0	0	0	0	0	0	0
msp_0779	Clostridium sp. CAG:417	-3.33787e-05	0	0.000145258	0	-0.000143376	0	6.80616e-05	0.00016285	-0.000460326	0	0.000112027	-0.000104572	0.000390535	-0.000103737	-0.000377387	-0.000140489	-8.9581e-05	0.000406771	6.16319e-05	0	0	0	0.000107504	0.000269535	0	0	0	0
msp_0780	unclassified Lachnospiraceae	-0.000636319	0.000375271	0.000638537	-0.000418803	-0.000893738	-0.00052104	-0.00104139	-0.000209299	-0.000467697	-0.000945678	0.000578433	0.000583993	0.000459886	-0.00168243	-0.00395911	-9.78575e-05	0.000463587	-0.00112453	-0.00143213	8.85385e-05	-0.000408564	0.000680556	-0.00699912	-0.00372148	-0.00125356	-0.00110927	-0.00261397	-0.00177178
msp_0781	unclassified Clostridiales	0.000819878	0.000122454	0.000149426	0	-0.000155029	0	0	0.00478427	4.88704e-05	-0.000184472	0.000562527	0.000615983	-0.000232307	5.35456e-05	-4.81069e-05	-0.000442058	-0.000640326	-4.32657e-05	0.000563746	0	0	0	0.00077751	0.000122488	0	-0.000782811	0.000505951	-0.000898879
msp_0782	Candidatus Gastranaerophilales bacterium MH_37	0	0	0	0	-0.000355222	0	0	0	0	0	-6.11337e-05	-0.000111271	7.68374e-05	0	0	3.7272e-05	0	0	0	0	0	0	-6.35366e-05	0	0	-0.000106364	-3.16588e-05	0
msp_0783	unclassified Firmicutes	0	0	0	0	0	0	0	0	0	0	-0.000366503	3.53964e-05	0	0	0	0	0	2.78406e-05	0	0	0	0	0	6.39228e-06	0	0	0	0.000130741
msp_0784	unclassified Clostridiales	-3.04242e-05	0	-0.00023435	0	0	-5.11585e-05	0	0	0	0	-0.00014638	-5.87804e-05	0	0	0	0	0	0	0	0	0	0	0	0	0	0	0	0
msp_0785	Collinsella tanakaei	9.14064e-05	0.000442563	0	0	0.000129466	-0.000254013	0.000533066	-0.000306634	-0.000136425	-4.35426e-05	-8.1236e-05	-9.34453e-05	0.000246092	-4.77197e-05	2.832e-05	-4.8112e-05	0	0.000495773	-0.000126602	0	8.98901e-05	0	-0.000410722	0.00026504	-6.0492e-05	5.28435e-05	3.64886e-05	0
msp_0786	unclassified Muribaculaceae	0	0	0	0	0	0	0.000184063	0	-6.93156e-05	0	1.24033e-05	0	0	-2.37093e-05	0	0	0	0	0	0	-0.000105228	0	0	9.69073e-06	0	0	0	0
msp_0787	unclassified	0	0	0	0	0	0	-0.000429981	-5.58755e-05	1.72256e-05	0	0.000171564	0	4.3823e-05	-1.90954e-05	-0.000155603	0	0	0	0	0	0	0	0	5.53669e-05	-9.35832e-05	0	0	-0.000387193
msp_0788	unclassified Rhodospirillales	3.87596e-05	0	0	0	-5.63938e-05	0	0	-0.000191406	0	0	0	2.56271e-05	0	0	0	3.79478e-05	0	2.66318e-05	-6.68147e-05	0	0	0	-4.26556e-05	1.49754e-05	0	0	-3.34963e-05	0
msp_0789	Prevotella sp. CAG:1185	0	0	0	0	0	0	0	0	0	0	-0.000164585	0	4.43926e-05	0	0	0	0	-0.000180263	0	0	0	0	0	0	0	0	0	0.000178838
msp_0790	unclassified Firmicutes	0	0	-0.000320083	0	0	0	0	0	0	0	0	0	0	0	0	0	0	0	0	0	0	0	0	0	0.000102204	0	0	0
msp_0791	unclassified Oscillibacter	6.20509e-05	3.61307e-05	0	0.000247863	0.000177881	3.0182e-05	0	0	0	0	-2.35717e-05	0	0	0	0	0	-3.31871e-05	-6.67751e-05	0	0	0	-0.000259722	0	8.99822e-06	0	0.000129019	6.73697e-05	0
msp_0792	Clostridium perfringens	0.000586336	0.000906548	0	0	3.40399e-05	0.0021671	-0.000420013	0	0.000189912	0	7.01114e-05	0.000254969	8.52421e-05	0.00167477	0.0014841	7.4438e-05	0.000100657	-6.74485e-05	0.00028582	0	0	0	0	-0.000190333	0	0	0.000452815	0
msp_0793	unclassified Clostridia	-9.26756e-05	0.00014217	0	0	3.27156e-05	0	7.78704e-05	0.000149366	-3.05464e-05	0.00187846	-0.000410306	0.00071185	0.000225297	0	-0.000163014	0.000241943	0	-7.65806e-05	0	0	0	0	-0.000268377	4.20623e-05	0	-0.000118375	0.000139367	0.000324444
msp_0794	unclassified Eggerthellaceae	0.000348053	-0.000268262	0.000898909	0	0.000147158	0	-8.30073e-05	-0.00242183	-8.55359e-06	0.000335565	0.00105346	0.00081932	0.00298632	1.59322e-05	0	-0.000251398	0.000256301	-6.52669e-05	-0.000723898	0	0	0	0.000152582	0	0	-0.000143173	0.000673461	0
msp_0795	unclassified	-5.0064e-05	0	0.000103337	0	-3.65961e-05	0	0	0	0	0	-0.000672305	-9.87618e-05	0	0	0	-5.28224e-05	0	0	0	0	0	0	-3.71916e-05	-9.32142e-06	0	5.65144e-05	0	0
msp_0796	unclassified Firmicutes	0	0	0	0	0	0	0	0	0	-4.58234e-05	3.37482e-05	-2.37461e-05	0	0	1.11187e-05	0	0	0	-4.98156e-05	0	0	0	0	0	0	0	3.02702e-05	0
msp_0797	unclassified Ruminococcus	0	2.22947e-05	0	0	0	0	0	0	0	0	0	0	0	0	0	0	0	0	0	0	0	0	0.000136472	0	0	0	0	0
msp_0798	unclassified	0	0	0	0	6.10117e-05	0	0	0	0	0	-0.000129878	5.83513e-05	0.000462765	0	-2.86499e-05	0	6.63896e-05	0	0	0	0	0	0	0	0	0	-9.16164e-05	-0.000157374
msp_0799	unclassified Bacteroides	0	0	0	0	0	0	0	0	0	0	0	4.91214e-05	0	0	0	0	0	0	0	0	0	0	0	0	0	0	0	0
msp_0800	Eggerthella sp. 51_9	-0.000168529	-0.000206245	-0.00010579	0.000327778	-0.00165585	0	0	0.00109551	0	0.00068447	-0.00119226	-0.000549752	-0.000384092	0	0	0.000822109	0.000695037	5.41193e-05	-0.000215974	0	0	0	-0.000402009	2.21746e-05	0	-0.00128591	-0.00119927	-0.000558272
msp_0801	Sutterella parvirubra	0.0010021	0.000591792	0	0	0	0	0	0	-0.00018825	0	0	0	0	0	0	0	0	0	0	0	-0.00771548	0	0	4.11247e-05	5.30487e-05	0	0	0
msp_0802	Bacteroidales bacterium H3	-2.55453e-05	0	0	0	-4.29069e-05	0	0.000117564	0	-2.02711e-05	0	0	4.95475e-05	4.66108e-05	-2.3237e-05	-0.00010678	-4.93179e-05	-3.21511e-05	0	0	0	-0.00144264	0	-0.000134024	-0.000181288	0	-0.000367114	-0.000203215	0
msp_0803	unclassified	0	0	0	0	0	0	0	0	0	0	-3.77168e-05	0	0	0	0	0	0	0	0	0	0	0	0	0	0	0	0	0
msp_0804	unclassified	2.2097e-05	0	0.000176027	0	0.000111937	0	0	0.000213164	-2.09798e-05	0	-0.000619019	-0.000508065	0.000347082	0	-0.000271465	3.7288e-05	3.81848e-05	-8.10902e-05	0.000772361	0	7.24632e-05	0	0	-3.61301e-05	0.000112766	0	0	0.00014101
msp_0805	unclassified Roseburia	1.25273e-05	0.000462346	0	0	0	0.000134456	0	0	0.00067986	0	0	0	0	0.000432498	-0.000159512	0	0	0.000264893	0	0	0	0	0	0.000181541	0.000529243	0	0	0
msp_0806	unclassified	0	0	-0.00021996	0	-4.41766e-05	0	0	-8.46893e-05	0	-9.12743e-05	5.87938e-05	0	-0.000136261	0	0	0	7.43186e-05	0	0	0	0	0	0	0	0	0	-5.29425e-05	-0.000158095
msp_0807	unclassified Firmicutes	0	0	0	0	4.89255e-05	0	0	0	0	9.73345e-05	3.78332e-05	2.77117e-05	0	0	0	-9.62003e-05	-0.000156274	0	0	0	0	0	0	0	-4.00538e-05	7.88129e-05	0	0
msp_0808	Clostridium sp. CAG:288	2.78744e-05	-1.89977e-05	0.000472086	0	-0.00143539	0	0	6.81818e-05	0	-7.24282e-05	-0.00023996	-4.29294e-05	0.000324048	0	-9.48102e-05	3.13603e-05	0.000104074	0	0.00105095	0	0	0	-0.000324133	-2.48268e-05	0	-5.24048e-05	0	0
msp_0809	unclassified	0	0	0	0	0	0	0	-0.000142708	0	0.000191206	-0.000393978	0	0	0	0	0	0	0	0	0	0	0	0	0	0	0	0	0
msp_0810	unclassified	0	5.44156e-05	0	0	0	0	0	0	0	0	-0.000604856	-2.66606e-05	0	0	0	0	0	0	0	0	0	0	0.000116111	0	0	0	0	0
msp_0811	[Staphylococcus] sp. CAG:324	0	0	-0.000891109	-0.000347009	-0.000571799	0	0	0.00920802	0	6.87682e-05	-0.000630047	8.44758e-05	-0.000190391	1.59279e-05	8.25251e-05	0.000775822	4.55683e-05	-6.19124e-05	0.000108172	0	0	0	5.05765e-05	0	0.000123337	-0.000108204	0.000895761	0
msp_0812	unclassified Lachnoclostridium	-8.32087e-06	0	0	0	0	6.75985e-05	0	0	0	0	-2.10855e-05	0	0	0	0	0	0	0	0	0	0	0	0.000241934	8.54389e-06	0	-0.000196426	0	0
msp_0813	unclassified Muribaculaceae	0	0	0	0	0	0	0	0	-1.07273e-05	0	0	0	3.65913e-05	0	0	0	0	2.69164e-05	0	0	-0.000418248	0	0	0	0	0	0	0
msp_0814	Lachnoclostridium sp. An138	0.000230994	-0.000136917	-0.00166346	0	-0.000419312	7.23501e-05	-9.83539e-05	-0.00010131	-0.000124444	0.000316348	-0.0008737	0.000305998	0.000148693	-6.69136e-05	1.18121e-05	-0.000111095	0.000381971	0.000232301	0.000763603	0.000293383	0	0.000770833	0.000386545	-3.02995e-05	0	0.000546309	-0.000822235	0
msp_0815	unclassified	0	0	-0.000298039	0	0	3.62944e-05	0	0	0	0.000192094	-4.04871e-05	5.25851e-05	0	0	1.56208e-05	0	0	0	0	0	0	0	0	0	0	0	0	0
msp_0816c	unclassified Clostridiales	0	0	0	0.000233333	0.000407152	2.61003e-05	0	0	-1.6995e-05	0	2.27517e-05	1.64922e-05	0	0	-3.481e-05	3.76281e-05	0	0	0	0	-0.000227707	0	0	0	0	0	0	0
msp_0817	unclassified Faecalibacterium	5.02113e-05	5.93892e-05	-0.000752606	0	-0.00011121	-8.7306e-05	0	0.000382049	0.000256814	0	6.83603e-05	0	0	-0.00012707	-0.000260835	0	0	-0.000993832	0	0	6.4529e-05	0	9.70546e-05	-0.0012769	-0.000242512	0	0	0
msp_0818	Clostridium sp. CAG:302	0.000392558	0.000264544	0.00100928	0	-0.00155956	-4.27633e-05	0.00113034	0.00117034	0.000216007	0	-0.000317419	-0.00129878	-0.000359137	0.000251452	-0.00111703	0.000361649	-0.00101419	-0.000402194	0.000157243	0	4.03328e-05	-0.000760417	0.000122012	0.000159583	0.000497662	0	-0.000343139	0.000856068
msp_0819	Candidatus Gastranaerophilales bacterium HUM_2	0	0	0	0	0	0	0	-6.67595e-05	0	0	-5.10786e-05	-2.45578e-05	0	0	-0.000338504	0	0	0	0	0	0	0	0	0	-0.00116867	0	0	0
msp_0820	unclassified Clostridiales	0.000824697	-0.00041442	-0.00219729	-0.00190812	-0.00133323	-0.0046989	-0.00125753	0.00333215	-0.00284454	-0.000243757	0.000850303	0.000480071	0.00185047	-0.00043129	-0.00296979	-0.000141691	0.000698352	-0.00351968	-0.00589564	-0.000749321	0.00111411	0.00075	-0.00415031	-0.00108645	-0.00288438	-0.000503853	-0.00194884	-0.00191702
msp_0821	Firmicutes bacterium CAG:313	0	0	0.000811315	0	-0.000899522	0	0.000150056	-9.72148e-05	0	0	0.000240437	-0.000120525	-7.89239e-05	-7.44314e-05	0	-0.000101037	-4.43799e-05	8.25828e-05	0.000848044	0	0	0	0	0.00122866	-5.43628e-05	0	0	0
msp_0822	unclassified Firmicutes	0	2.11636e-05	0	0	0	0	0	-6.95025e-05	0	0	3.82226e-05	0	6.21536e-05	0	-0.000234144	0	0	0	0	0	0	0	-0.000308275	0	0	0	-3.16469e-05	0
msp_0823	Ruminococcus sp. CAG:724	0	0	-0.000236703	0	0	0	0.000162647	0	7.66424e-06	0	3.35683e-05	-0.000123677	0	0	0	0	0	0	0	0	0	0	0	8.44163e-05	-5.36396e-05	0	0	0
msp_0824	Clostridium sp. CAG:967	0	0	0	0	0	0	0	0	0	-7.742e-05	-6.52224e-05	0	0	0	0	0	0	0	0	0	0	0	0	0	0	-4.46288e-05	0	0
msp_0825	Firmicutes bacterium CAG:791	0	0	0	0	0	0	0	0	0	0	1.64688e-05	0	0	0	0	0.000160592	6.98211e-05	0	0	0	0	0	0	5.97915e-06	0	0	0	0
msp_0826	unclassified Firmicutes	0	0	0	0	0	0	0	0	0	0	0	0	0	0	0	0	0	0	0	0	0	0	0	0	0	0	0	0
msp_0827	unclassified Odoribacteraceae	-7.40398e-05	0.000525556	0	0	0.000180265	0	0	0	0	0	-7.271e-05	0	0	0	0	6.94847e-05	0	-2.57452e-05	0	0	0	0	-3.67871e-05	0	0	0	3.15115e-05	0
msp_0828	Massiliomicrobiota sp. An80	-0.000493289	-0.00022477	0.000121913	-0.000222833	-0.00049527	-0.000272602	0	-9.85305e-05	9.42179e-05	-4.78697e-05	0.0001029	-0.000302212	-0.00012706	0	-7.84737e-05	0.000266804	0.000315291	0.000194137	0.00246967	0	0	0	7.66709e-05	0.000524545	0	-7.98708e-05	-6.1018e-05	-0.000434167
msp_0829	unclassified Lachnospiraceae	0	0	0	0	-8.57894e-05	0	0	0	-2.08037e-05	0	0.000134918	-0.000200579	-8.20518e-05	0	-1.69247e-05	-3.99348e-05	0	0	7.54253e-05	0	0	0	0	0	0	0	0	0
msp_0830	unclassified Proteobacteria	0	0	0	0	0	0	0	-0.000139734	0	-6.35496e-05	-0.000193812	6.74512e-05	9.58471e-05	0	0	0	6.5694e-05	-3.08946e-05	0	0	0	0	0	0	-0.000578603	0	3.35697e-05	0
msp_0831	Faecalicoccus pleomorphus	9.07207e-05	0.000498654	0.00051474	0	-8.30569e-05	0.000156749	0	-0.00064693	-0.000353988	0.000571581	-6.50411e-05	0.000191896	0.000299317	0	-0.000177464	0.00797558	0.000126571	-6.7262e-05	0.000554442	0	0	0	9.20835e-05	0.000790529	0	0	5.83373e-05	0
msp_0832	Streptococcus pasteurianus	0.00138281	0.000308294	0	0	7.59562e-05	0.00113877	0.000669332	0	0.000212534	0	-3.57079e-05	9.05764e-05	0.000149052	0.000205848	-0.000119	0.000224877	-5.30379e-05	0.00018353	0	0	0	0	0	0.000483785	-0.000194302	0	0.000893921	-0.00016849
msp_0833	Streptococcus thermophilus	-0.00134925	-0.00056423	-0.00349494	0	-0.000508026	-0.000247453	0.00139289	-0.000804099	0.00618692	-0.000391122	-0.00173761	-0.0016444	-0.00142147	0.000753649	-0.000321849	-0.00797387	-0.00519591	0.000314212	-0.000670205	0	0	-0.00183079	-0.00129235	0.000378292	0	-0.00379133	0.00166615	-0.00153892
msp_0834	unclassified Dialister	6.30553e-05	7.90014e-05	0	0	0	0	0	4.67585e-05	6.42175e-05	0	0	0	6.24761e-05	0	0	0	0	6.11333e-05	0	0	0	0	0	9.19763e-05	0	0	0	0
msp_0835	Clostridiales bacterium 41_21_two_genomes	0	-1.57401e-05	0	0	0	0	0	-0.0001453	9.93219e-06	0	-0.000381911	0.000197807	0.000112089	0	-7.42533e-05	-0.000304105	-0.000240112	0	-0.000132701	0	0	0	-0.000273825	0	0.0001622	0.00109072	0	0
msp_0836	unclassified Muribaculaceae	0	0	0	0	0	0	-9.26292e-05	0	2.06066e-05	0	1.16435e-05	0	0	0	0	0	0	0	0	0	0	0	0	0	0	0	0	0
msp_0837	unclassified Firmicutes	2.45527e-05	0	0	0	0.000276873	0	0	0	0	0	0.000101162	-0.000184763	0.000141454	0	-7.47615e-05	0.00131922	0.00182567	-0.00012635	0	0	0	0	0	6.91912e-05	0	0	0	0.000889779
msp_0838	Candidatus Gastranaerophilales bacterium HUM_6	0	0	0	0	0	0	0	0	0	0	-8.36376e-05	2.42204e-05	0	-1.63722e-05	-1.51796e-05	-5.3158e-05	0	0	0.00066857	0	0	0	0	0	0	0	0	0
msp_0839	Clostridium sp. CAG:964	-2.15272e-05	0.000314944	0	0	-0.000156537	0	0	0	0	0	-0.000425149	-2.68196e-05	0	0	0	-4.86917e-05	0	0	5.62596e-05	0	0	0	0	1.52309e-05	0	-6.05179e-05	0.000128096	0
msp_0840	unclassified	0	0	-0.000231772	0	0	-5.09111e-05	0	0.000187139	-1.88877e-05	-5.18676e-05	-9.18706e-05	-0.000287847	-0.000225086	0	0	-0.000117027	4.60391e-05	-0.000112496	-3.00047e-05	0	0	0	0	1.84934e-05	0	-5.86844e-05	-0.000290095	0
msp_0841	unclassified Oscillibacter	4.79062e-05	4.5847e-05	-9.67843e-05	0	-0.00086019	0	0	0.000343567	4.85446e-05	0	-0.000263142	-0.000287448	0.000811637	9.87606e-05	0.000268068	3.21667e-05	0.000422512	0.000176857	0.000430245	0.000141624	0	0	5.78132e-05	5.54148e-05	9.57905e-05	0.000238408	0.0003855	-0.0013561
msp_0842	unclassified	6.28967e-05	0.000355219	-0.000135433	-0.000246795	-0.000128046	0	-0.000123409	0.000429185	1.51259e-05	0	8.18941e-05	0.00014175	0	-1.38597e-05	0	0.000318846	0.000793473	-6.41194e-05	-5.98271e-05	0	2.62412e-05	0	0.000516254	-1.37395e-05	0	0	0.000248995	0
msp_0843	Weissella confusa	0	0	0	0	0	5.3148e-05	0.000813792	0	0.000751437	-4.48203e-05	0	-0.000171593	0	0.000353403	-0.000975123	7.50455e-05	0	-0.000240544	0	0	-0.000602345	0	0	-0.000428051	-0.000125723	0	0	0
msp_0844c	Campylobacter concisus 2	-0.000718034	4.64383e-05	0	0	0.000313498	3.5434e-05	0.000323306	0	-0.000110318	0.000165276	1.55599e-05	7.729e-05	0	0.00984283	-2.80667e-05	-2.93509e-05	-5.65015e-05	2.67249e-05	0	0	0	0	0	0.000123424	0	0.000188506	4.99028e-05	0
msp_0845	Clostridium sp. CAG:440	-8.14437e-05	0.000157558	-0.00115325	0	-0.000376591	0	0.00101124	0	0.000105823	0	0.000346436	-9.22051e-05	0	-0.000354366	4.07985e-05	0	0.000651178	-7.91765e-05	-7.88142e-05	0	-0.00019225	0	0	7.94758e-05	-0.000158564	0	3.20782e-05	0
msp_0846	unclassified Cloacibacillus	8.53517e-05	0.000108858	0	0	-9.41873e-05	0	6.86216e-05	0	-7.66511e-05	0	0	0	0	4.32313e-05	0	0	0	-3.12802e-05	0	0	0	0	0	-8.78847e-05	0	0	0	0
msp_0847	unclassified	0.000190141	0.00054464	-0.00280182	-0.000192308	-0.000293144	0	0	0.000976092	0	0.00128167	-0.000666328	-0.000139978	0.000344282	-5.51383e-05	3.88596e-05	0	0.000165545	0	0.00192145	0	0	0	0	-8.58411e-05	-6.3266e-05	-0.0010326	-0.000314596	0.000276364
msp_0848	unclassified Clostridiales	0.000424805	0.000746181	0	0	2.93871e-05	-1.69179e-05	0	4.68401e-05	-3.83442e-05	-0.000234785	-0.000163101	-0.00013308	0	0	3.06667e-05	0	0	6.70064e-05	-4.44928e-05	0	0	0	0.000426866	-5.07972e-05	0	0.000357047	0.000115335	0
msp_0849	unclassified Alistipes	0	-1.30542e-05	0	0	0	0	0	0	0	0	-1.94191e-05	4.80313e-05	0	0	0	0	3.73656e-05	0	-9.90059e-05	0	0	0	0	0	0	0	0	0
msp_0850	unclassified Firmicutes	4.65521e-05	0	0	0	0.00040224	0	0.000999112	0	0.000129917	0.00151843	-0.000257411	-0.000544116	-0.000156942	-0.000111902	0.000140636	-0.000277548	-0.000165768	6.67859e-05	-0.000198393	0	-0.000156195	0	-0.00012237	0.00029882	0.000210784	0.000147952	-0.000135299	-0.000708
msp_0851	unclassified Clostridiales	0.000420678	0.000318664	-0.000320021	-0.00158791	0.00025861	-0.000446434	-6.82943e-05	0.00100985	-0.000298127	-0.000145033	4.56574e-05	-0.00475726	-0.000328808	-0.000112804	0.00244456	0.000173855	0.00110484	-7.561e-05	0.000573305	0	0	0	-0.000320361	0.000854083	0	0	0.000535093	0
msp_0852	Eubacterium dolichum	0.00091734	0.000776159	0	0	-0.000598054	-0.000315591	7.26852e-05	-0.000480988	-0.000206401	0	0.000283124	-0.000211656	-9.53542e-05	-0.000460009	-8.50072e-05	-0.000227262	-0.000292718	-4.16113e-05	-4.79638e-05	0	-0.000242066	0	-0.000776425	-0.00130491	-0.00019198	-4.87523e-05	-0.00011519	0
msp_0853c	Granulicatella adiacens	0.00361129	-0.000130286	0	0.000587931	0.000686268	5.86341e-05	7.47644e-05	-0.000222563	0.00404043	0.00310874	0	0.000152891	-0.000214517	-7.81269e-05	-0.000236688	0.00011417	-0.00156573	0.00108003	0.000265585	0	0	0	0	-0.000180704	0	0	0.00154712	0
msp_0854	Clostridium sp. CAG:349	2.19471e-05	0	0.000336112	0	-0.000370417	0	0	0.000718097	-3.54656e-05	0.0010628	-0.000358174	0.000203401	-0.000355546	7.62582e-05	-4.87448e-05	0	-7.8452e-05	0.000117757	-5.08013e-05	0.000228552	0	0	0.000114333	4.84547e-05	-0.00199075	0	0.000320547	-0.000617778
msp_0855	unclassified Clostridiales	0.000159006	0.00082669	0.000248019	0	-4.12945e-05	0	0.000350066	0.000712685	-0.000238443	-0.000147697	-0.000161179	0.000231603	0.00024869	-3.94279e-05	0	0.000270514	0.000558739	4.61951e-05	5.77681e-05	0	0	0	0.000160164	0.000121018	0	-0.000669643	0.000773816	0.000483035
msp_0856	Clostridium sp. 28_17	0	0	0	0	0	0	0.000263832	9.30745e-05	-5.69293e-05	-6.4068e-05	-0.000921969	0.000138638	8.43458e-05	1.71496e-05	-0.000162297	2.28722e-05	-0.000278171	0	-0.000306899	0	0	0	-6.9958e-05	-4.52974e-05	0	-0.000147537	-8.9156e-05	0.000740132
msp_0857	unclassified Muribaculaceae	0	0	0	0	3.76818e-05	0	0	0	0	0	0	0	0	0	0	0	0	0	0	0	0	0	0	0	0	0	0	0
msp_0858	Clostridium sp. CAG:433	-1.20325e-05	0	0	0	0	0	9.34677e-05	-6.34157e-05	4.55769e-05	0	0.000386092	-6.16808e-05	0.000756897	2.18667e-05	-0.0012674	-9.02138e-05	-6.55816e-05	-6.0084e-05	0.000176568	0	0.000224569	0	3.71328e-05	-5.63313e-05	6.27317e-05	0.000250144	-0.000207879	0.000867111
msp_0859	unclassified	1.59921e-05	5.48394e-05	0	0	0	0	0	7.8907e-05	-2.94042e-05	0.000478298	-4.79414e-05	2.68675e-05	-3.67565e-05	0	0	6.15305e-05	0	0	0	0	0	0	0.000160414	0	0	0	0	0
msp_0860	unclassified Intestinibacter	-0.00040667	0.000108425	0	-0.00123932	0.000173634	-0.000406325	-0.000609083	-0.000372126	-0.00220616	-0.000102919	-0.000611327	0.000259339	-0.000340512	-0.000494124	0.000861274	0.000634328	0.00167232	0.000569495	0.000449328	-0.00031636	0	0	-6.15268e-05	-0.000447463	0	0	0.000246639	0
msp_0861	unclassified Oscillibacter	0.00086839	0.00149587	0.00055423	0	0.00151662	-0.00090219	-0.000203301	-0.00056638	-0.00108894	0.000155917	0.000579157	0.00117077	-0.00144451	-0.00188902	0.00175185	0.00314999	0.000258237	-0.00142859	-0.00157393	-0.000281537	0.000563253	0.00282708	0.000822668	0.000757114	0.0009592	-0.00468498	-0.00128926	-0.000471207
msp_0862	unclassified Muribaculaceae	0	0	0	0	0	0	0	0	0	0	0	0	0	-3.55865e-05	0	0	0	0	0	0	0	0	0	0	0	0	0	0
msp_0863	unclassified Lachnospiraceae	0	0	0	0	0	0	0	0	0	0	0	0	0	0	0	0	0	0	0	0	0	0	0	0	0	0	0	-0.000328
msp_0864	unclassified	0	0	0	0	0	6.28841e-05	0	0	0	0	-2.05055e-05	2.21761e-05	0	0	2.03592e-05	0	0	0.000236973	0	0	0	0	0	0	0	0	0	0
msp_0865	Enterobacter kobei	0.000178957	0.000608602	0	0	-0.000109383	-0.000417165	-9.53704e-05	0	0.000420595	0	0	0	0	0.000132436	0.000173244	-5.43951e-05	0	9.98731e-05	0	0	0.000267618	0	-0.000119645	-0.00032182	-4.03219e-05	0	9.44107e-05	0
msp_0866c	Lactobacillus agilis	0	0	0	0	0	0	7.14356e-05	0	2.14737e-05	0	0	0	0	0	0	0	0	0	0	0	0	0	0	0	0	0	0	0
msp_0867	unclassified Firmicutes	0	5.29983e-05	0	0	0	0	0	0	5.99997e-05	-0.000210801	0.000162294	-5.54176e-05	0.00026168	-1.62676e-05	0.00017346	6.40666e-05	0.00010521	0	0	0	0	0	0	9.72318e-05	-5.2177e-05	4.64613e-05	3.03842e-05	0
msp_0868	Lachnospiraceae bacterium 2_1_46FAA	-7.72821e-05	6.98569e-05	0	0	-0.000152175	0.000548189	0	0	0.000494392	0	0	0	0	-0.000257075	3.69461e-05	-2.8285e-05	0	0	0	0	0	0	0	-0.000122869	-5.23167e-05	0	0	0
msp_0869	unclassified Acidaminococcaceae	0	0	0	0	-0.00013976	0	0	0	0	0	0	6.10202e-05	0	0	0	0.0040891	0	0	7.45475e-05	0.000888635	0	0	0	0	0	0	0	0
msp_0870	unclassified Bacteroidales	0	0	0	0	0	0	0	0	0	7.99399e-05	2.72486e-05	-1.87174e-05	0	0	0	0	0	0	0	0	0	0	0	0	0	0	0	0
msp_0871	unclassified	9.34959e-05	0.000476496	0	0	0	0	0	0	9.46377e-06	0	0.000140636	0.0010324	4.11251e-05	0	-0.000210782	0	3.10888e-05	0	0	0	0	0	0	1.41552e-05	0.00010978	0	0.000181088	0
msp_0872	Clostridium sp. CAG:567	-2.46299e-05	-1.39401e-05	0	0	-8.61972e-05	0	0	0.000680145	6.99607e-05	0.00029113	7.23608e-05	0.000180342	-5.58593e-05	-4.94927e-05	-0.000317857	0.00242941	0	-0.000427082	0	0	0	0	9.80873e-05	-7.26419e-05	-4.35134e-05	0	6.23537e-05	-0.00109968
msp_0873	Olsenella sp. Marseille-P2300	7.77633e-05	-6.3444e-05	0	0	3.22079e-05	0	0	-0.000127114	5.61987e-05	-2.89077e-05	0	0.000192665	0.000385819	0	5.28281e-05	0	2.97676e-05	-2.54914e-05	0	0	0	0	0	0	0	0	0	0
msp_0874	unclassified Firmicutes	0.000649205	-0.000153445	0	-0.000578348	-0.00104503	-0.000149927	0.000103042	0.00118026	0.000178586	-5.51053e-05	0.000886928	0.00207833	0.00615519	-0.00118711	-0.000554213	-0.0005155	-0.00146202	-0.000400864	0.000697522	0.000353433	0.000162515	0	-0.00180007	0.000599079	0.00195454	-0.000139806	-0.000459272	0
msp_0875	unclassified Bacteroides	0	0	0	0	0	0	0	0	0	0	2.43526e-05	0	0	0	0	0	0	0	0	0	0	0	0	0	0	0	0	0
msp_0876	unclassified Firmicutes	0	9.73926e-05	0	0	-0.000211214	0	0	0.000149174	-1.83566e-05	0	-0.000489316	-0.000213578	0	0	-2.27633e-05	0	0.000283161	0	0	0	0	0	0	-4.37616e-05	-0.000106931	-4.99784e-05	-0.000125453	0
msp_0877	Massiliomicrobiota timonensis	-0.000873629	-0.00037723	0.000309793	0.000350427	-9.5066e-05	-0.00106898	0	-0.000400751	-0.000190967	0.000358794	0.000163701	-0.0005263	-0.000237709	0	-1.69063e-05	0.000114981	-0.000916997	-0.000519049	-0.000161822	0.000425364	0	0	0.00039198	-2.95242e-05	0	-0.000483684	-0.00166064	-0.00170139
msp_0878	Bifidobacterium gallinarum == saeculare	0	0	9.14835e-05	0	0	0	0	0	-0.000141313	0.000207919	-2.35116e-05	0	0.00014408	0	0	8.79915e-05	0	-4.55452e-05	0	0	0	0	-3.60719e-05	0	0	-4.1326e-05	-8.99009e-05	0.000154411
msp_0879	unclassified Faecalibacterium	-0.000191168	0	-0.000759699	-0.000289174	-0.000194516	0	0.000494962	-0.000427555	-2.66105e-05	-0.00136014	-0.0015215	-0.00048519	0.00147058	-0.000114203	0.000705196	-9.77742e-05	0.000645601	-0.000155499	-0.00112506	-0.000413917	-0.000178164	-0.00298611	-0.00232838	0.000233789	-0.0002045	0.000631776	-0.00100176	0.00106786
msp_0880	unclassified Muribaculaceae	0	0	0	0	0	0	0	0	0	0	0	0	0	0	0	-2.94808e-05	0	0	0.000470443	0	0	0	0	0	0.000102922	0	0	0
msp_0881	Haemophilus parainfluenzae	-0.00320115	-0.00153056	-0.00132518	0	-0.000564784	-0.000263653	-0.00766282	-0.000969866	-0.00312722	0.000107045	-0.00275119	0.000441745	-0.00067965	0.011139	-0.00524384	0.000950625	-0.000163595	-0.00312796	0.00157813	-0.000185417	0.000933766	0.0011625	-0.000305615	-0.00368424	-0.000641045	0.000520384	0.000640644	0
msp_0882c	Candidatus Gastranaerophilus phascolarctosicola	0	0	0	0	0	0	0	0	0	0	0	0	0	0	0	0	0	0	0	0	0	0	0	0	0	0	0	0
msp_0883	Clostridium spiroforme	-0.00219434	-0.0013976	0	0	-0.00140646	-0.000335499	-0.000102634	0.000161755	-0.000366162	-0.000244831	0.000644381	-0.000150391	0.000235275	0.0002155	0.000577343	-0.000328846	-0.000716423	0.000306207	0.00269467	0.00012147	0	0.000489583	-0.000374181	0.00148472	0	0	-0.000618759	-0.0016743
msp_0884	Veillonella atypica	0.00068824	-0.000474784	0.000207508	0.00202467	-0.000399263	-0.000169122	-0.000753623	-0.0010358	-0.000313299	0.000792628	-0.00187615	0.000297651	4.14377e-05	0.0120153	0.000804833	0.00279766	0.000226853	0.000453601	-0.000117069	0	0.000184856	-0.000625	-0.000337312	0.000443395	0.000214203	0.00125882	0.000157009	-0.00056
msp_0885	unclassified Roseburia	6.73542e-05	0.000181496	-0.00256543	-0.00024359	-0.00246666	-4.18423e-05	0.000151573	-0.000907673	0.000242706	0	-0.000391632	-0.000671269	0.00153095	-0.000221975	-0.000978413	-0.000196278	-9.84379e-05	0.00023309	-0.000207368	0	-0.000139008	0	-0.00051118	-9.13064e-05	0	-0.000116658	0.000186914	0
msp_0886	Firmicutes bacterium CAG:449	0	0	-0.00011869	0	-5.41194e-05	0	0	0	1.05899e-05	6.68863e-05	-0.000222732	0	0	-6.40405e-05	0	0	0	0	0.000115783	0	0	0	-4.22298e-05	0	-4.31522e-05	0	0	-0.000179841
msp_0887	unclassified Clostridiales	0.00112293	0.000637524	0	0	-0.000346023	-0.000133383	0.000604879	0	0.000410057	0	-2.20524e-05	-3.19402e-05	0	0.000239799	8.38401e-05	-0.000108005	0	-0.00029002	-4.73322e-05	0	-0.000327902	0	0.000578659	0.00254241	-0.000145954	8.8997e-05	0	0
msp_0888	unclassified Prevotella	0	2.21019e-05	0	0	3.72703e-05	0	0	0	-9.19887e-06	0	0	0	0	0	0	0	0	0	0	0	-0.000453092	0	0	5.11376e-05	0	0	0	0
msp_0889	unclassified Phascolarctobacterium	0	0	0	0	0	0	0	0	0	0	0	0	0	0	0	0	0	0	0	0	0	0	0	0	0	0	0	0
msp_0890c	Leuconostoc mesenteroides	0	0.000236016	-0.000324615	0	-5.54761e-05	0	0.000294771	8.05085e-05	0	-9.99475e-05	-4.08684e-05	-0.0018115	0.000310382	0	1.80032e-05	6.66393e-05	-0.000193271	0	-0.000136184	0.000176659	0.00024883	0	0	2.40926e-05	0.000391426	0	-0.000189699	0
msp_0891	unclassified Firmicutes	-3.06727e-05	0	0	0	-8.43837e-05	0	0	-6.13476e-05	6.7028e-05	0	-9.44123e-05	-4.0747e-05	0	0	7.37262e-05	0	-0.000113136	-8.93739e-05	-0.00016713	0	0	0	0	6.11829e-05	-0.000120092	0	0	0
msp_0892	unclassified Eubacterium	0	0	0	0	3.52021e-05	0	0	0	0	0	8.61856e-05	3.37896e-05	0	0	1.36878e-05	9.668e-05	0	0	0	0	0	0	-4.90886e-05	0	0	0	0	0
msp_0893	Faecalibacterium prausnitzii 2	0.000946451	0.000750517	0.000739556	-0.00138889	-0.000353235	-0.00118897	-0.000666285	-0.000688237	0.00057699	-0.00257903	0.000993264	0.000343315	0.00135214	-0.000439833	-0.00215949	-0.000120203	0.00110664	-0.00174447	-0.00119124	-0.0013684	-0.00107495	0	-0.00438258	-0.00122378	0.00287403	-0.00064425	-0.00112357	-0.000508
msp_0894	unclassified Prevotella	-2.63446e-05	0	0	0	0	0	0	0	9.23902e-06	0	0	-2.97349e-05	-3.59104e-05	0.000858261	0.000377516	0	0	0	0	0	0	0	0	3.95284e-05	0	0	-3.39616e-05	0
msp_0895	Acetobacter sp. CAG:977	0	0	0	0	0	0	0	0	0	0	2.01982e-05	-7.52065e-05	-6.21988e-05	0	0	0	0	0	0	0	6.20596e-05	0	0	0	0.00267446	0	0	0
msp_0896	Candidatus Methanomassiliicoccus intestinalis	0	0	0	0	-9.38931e-05	0	0	0	0	0	-1.13701e-05	0	0	0	0	0	0	0	0	0	0	0	-0.000133565	0	0	0	0	0
msp_0897	Candidatus Gastranaerophilales bacterium HUM_1	0	0	0.000241489	0	0	0	-6.82737e-05	0	0	0	-2.17124e-05	0	0	0	-0.000514948	0	0	0	0	0	0	0	0	0	-5.94732e-05	0	0	0
msp_0898	butyrate-producing bacterium SS3	-0.0020983	-0.000404687	0.00146123	-0.000775855	-0.00102741	-0.00687189	-0.00374664	-0.00228109	-0.00344252	-0.00204702	0.0011098	0.000600904	-0.000690457	-0.0020036	-0.00159586	0.00132756	-0.00066459	-0.00195807	-0.00154071	-0.000764625	-0.00222067	-0.00191667	-0.00352665	-0.0109188	0.000565777	-0.0015756	-0.000786807	-0.00286484
msp_0899	unclassified Eubacterium	1.87737e-05	0	0	0	0	0	0	0	0	0	1.40997e-05	0	0	0	-1.53869e-05	0	0	0	0	0	0	0	0	0	0	0	0	0
msp_0900	unclassified	0	0	0	0	0	0	0	0	0	4.36506e-05	3.70859e-05	-3.408e-05	0	-1.77786e-05	0	0	0	-2.49931e-05	0	0	0	0	0	-1.41189e-05	0	0	0	0
msp_0901	unclassified Blautia	-0.000142603	0	0	0.000582116	0	3.51452e-05	0	0	0	0	0	-9.1349e-05	0	0	0	-6.47472e-05	9.30385e-05	-5.3329e-05	3.62943e-05	0	0	0	0	0	0	0	-0.000338549	0
msp_0902	unclassified Firmicutes	0	0	0	0	0	0	0	-0.000118396	0	0	-6.60014e-05	0	0	0	0	0	2.98872e-05	0	0	-0.000100251	0	0	0	0	5.39174e-05	-5.54564e-05	-9.65464e-05	-0.000164167
msp_0903	Oscillibacter sp. 57_20	-0.00199212	-0.00175941	-0.000884027	0	0.00135473	-0.00487911	-0.000452854	0.00113498	-0.000872213	-0.000480867	0.000910592	-0.000425264	0.000582858	-0.0022681	-0.000760723	0.00126792	0.000944081	0.00140065	0.00263738	-0.000645528	0.0023807	0	-0.000644096	0.000453802	-0.000684348	-0.000951039	0.00252668	-0.000763796
msp_0904	unclassified Clostridiales	3.1271e-05	0	-0.00226522	0	-0.0014267	0	5.34986e-05	0.000221899	-4.95616e-05	0	-0.000813398	-0.000241498	0.000140625	-0.000264047	0	3.32569e-05	-9.21827e-05	0	-0.000522569	0	0.000132675	0	0.000199991	0.000348898	0	0.000124122	0.000201659	0.00148551
msp_0905c	Treponema succinifaciens	0	0	0	0	0	0	0	0	0	0	0	0	0	0	0	0	0	0	0	0	0	0	0	0	0	0	0	0
msp_0906	Clostridium sp. 2789STDY5834924	0.000573655	-0.000222872	0.000299471	0.000247863	-0.00250119	-0.000640835	-0.00128384	0.000371042	-0.00123372	-0.00158303	0.000301012	0.000659299	-0.000816793	0.000933617	-0.000886853	-0.000182589	0.000804258	-0.00285722	-0.000355722	0	0.00212657	0	-0.00174515	-0.00291252	-0.00041148	0.00102043	-0.00428813	0
msp_0907	Clostridium sp. CAG:465	0	0	0	0	-7.93255e-05	0	0	0	0	0	-0.00064694	-6.22801e-05	-3.33752e-05	0	-0.000142501	0.000247271	0.000102777	0	0	0	0	0	0	2.34403e-05	0	0	0	0
msp_0908	unclassified	0.00326612	0.0039629	0.000489521	-0.000658974	-0.000448961	-0.0003485	-0.000414813	0.000384593	-0.00117671	0.00121697	-0.00155681	-0.000404019	0.000647911	-0.000957017	-0.00044523	-0.000452094	-0.00115794	0.000787285	0.000982821	0	-0.000181646	-0.0024375	-0.000534189	0.000267719	0.000428499	-0.000628489	0.00280737	-0.000559259
msp_0909	Clostridium sp. CAG:768	0	0	0	0	0	0	0	-4.33149e-05	-2.24712e-05	0	-3.101e-05	-3.19108e-05	-0.000195304	0	0	0	0	0	0	0	0	0	0	2.20318e-05	7.74304e-05	0.000256843	0	0
msp_0910	Bifidobacterium catenulatum	0.000563191	0.00173131	0	0	-0.00034183	0	0	6.76634e-05	5.02579e-05	0.000186836	-0.000515353	-0.0027738	-0.000522164	-1.43591e-05	0	-0.000671976	-0.000346433	-0.000380467	-0.000748237	-0.000107693	0	0	0.000156159	0	0	0.000689079	-0.00095697	0
msp_0911	unclassified Firmicutes	0	0	0	0	0	0	0	0	0	0	-0.00099235	-4.35154e-05	-0.000101195	0	0	3.64002e-05	0	0	0	0	0	0	0	1.72959e-05	0	0	0	0
msp_0912	unclassified Clostridiales	0	5.81647e-05	0	0.000196581	0	0	0	0	0	0	0	0	0	0	0	0	0	0	0	0	0	0	0	0	0	0	0	0
msp_0913	unclassified	0	0	0	0	0	0	0	0	0	0	1.21884e-05	0	0	0	0	0	0	0	0	0	0	0	0	0	0	0	0	0
msp_0914	unclassified Firmicutes	-1.3757e-05	0	0	0	-9.57826e-05	0	0	0	1.06082e-05	0	0	2.83051e-05	0	0	0	0.000192312	0	8.82817e-05	0	0	0	0	4.68148e-05	0	0	0.000380633	0	0
msp_0915c	unclassified Candidatus Gastranaerophilales	0	0	0	0	0	0	0	0	0	0	0	0	0	0	0	0	0	0	0	0	0	0	0	0	0	0	0	0
msp_0916	Bifidobacterium animalis	-0.00038929	0.000475014	-0.000115716	0	0	-0.000100871	9.95412e-05	-7.59609e-05	2.49518e-05	0	-1.72793e-05	-0.0010462	0.000183376	0	-8.8883e-05	-0.00187821	-0.000597025	3.9784e-05	0.000299391	0	0	0.00103009	8.64274e-05	-3.08668e-05	0.000279021	0.00018358	0.00029764	0
msp_0917	unclassified Firmicutes	0.000576492	0.000215651	-0.00207202	-0.00222056	0.00126226	0	0.000349642	0.000578298	-0.0001301	-0.000249685	0.00031432	0.000587631	0.00229201	-0.00070648	-0.000965436	0.000334141	0.000284465	0.000402453	-0.000290714	0	-0.000605482	0	0.000149124	0.00163005	-0.000439652	-0.00014866	0.000523874	0
msp_0918	unclassified Prevotella	0.000178724	0	0	0	0	0	0	-0.000101941	-0.000158497	0	0	0	0.000105125	0	0	0	0	0	0.000101321	0	0	0	0	0	0	0	5.41036e-05	0
msp_0919	unclassified Sutterella	-1.04187e-05	0	0.000108498	0	0	0	-6.80021e-05	0	0	0	0	0	0	0	0	0	0	0	0	0	0	0	0	0	0	0	0	0
msp_0920	unclassified Bacteroidales	0	0	0	0	0	0	0	0	0	5.2409e-05	0	2.41251e-05	0	0	0	0	0	0	0	0	0	0	0	-1.15326e-05	0	0	0	0
msp_0921	unclassified Clostridiales	-1.16195e-05	0	0	0	0	0	0	5.73524e-05	0	-3.86096e-05	-0.000121985	0	0	0	0	0	7.87075e-05	0	0	0	0	0	0.000125141	0	0	0	0	0
msp_0922	unclassified Firmicutes	0	0	0	0	-0.00023495	0	0	0	0	9.98951e-05	0	3.98563e-05	0	0	0	4.90254e-05	0	0	0	0	0	0	0	3.085e-05	0	0	0	-0.000172222
msp_0923	Veillonella seminalis	0	0	0	0	0	0	0	0	0	0	0	0	0	0	0	0	0	0	0	0	0	0	0	0	0	4.39406e-05	0	0
msp_0924	Methanobrevibacter smithii 2	0	0	-0.00106607	0	0.000122444	0	0	0.000578433	0	0	-0.000236378	0.00018504	-0.000309522	0	0	0.00287307	0.00350814	0	0.000313991	0.000407943	0	0	0	0	0	0	-6.58584e-05	0
msp_0925	Lactobacillus gasseri 2	0.000279276	-7.84414e-05	0	0	0.000251433	6.85154e-05	0	-0.000149749	0.000235669	0.000279711	-2.18377e-05	-0.000820604	0.000367476	0.000254167	0.000668282	-6.42906e-05	-0.00081015	0.000728603	-0.000193759	0.000688552	0	0	3.17545e-05	0.000916971	-4.61621e-05	-4.36395e-05	0.000602059	0.000266758
msp_0926	unclassified Dialister	0	0	0	0	0	-0.00022029	0	0	0.000207138	0.000844858	0	0	3.24187e-05	0	9.77312e-05	0.000412071	0	6.58258e-05	0.000145607	0.000288405	0	0	-0.000110171	0.000509068	0	0	0	0
msp_0927	unclassified Coprobacillus	0	0	0	0	0	0	0	-5.03773e-05	0	0	-0.000281206	0	3.86153e-05	0	0	0	0	0	-4.28429e-05	0	0	0	4.13503e-05	0	0	0	-0.000124267	-0.00023323
msp_0928	unclassified	0	0	8.57143e-05	0	3.74546e-05	0	0	0	0	0	-0.000268156	-3.30302e-05	4.3491e-05	0	1.6652e-05	0	0	0	0.000107528	0	4.09708e-05	0	0	0	0.00361213	4.75144e-05	0	0
msp_0929	unclassified	6.23232e-05	0.000670546	0	0	9.82208e-05	0	0	0.00013224	0	-0.000218294	-0.000683417	-4.17026e-05	8.21415e-05	0	0	0	0	0	-4.80742e-05	0	0	0	0.00077024	0	0	0	7.52903e-05	-0.000186667
msp_0930	unclassified Lachnospiraceae	0.000562324	0.000910231	-0.000823435	-0.000623932	-0.00123084	-0.00664241	-0.00115049	-0.00194916	-0.00286477	-0.00255789	-0.000629187	0.000601287	0.000578537	0.000823893	-0.00114435	0.000807216	-0.000700732	-0.00260942	-0.000905265	0.000153472	-0.00152043	0	-0.0024694	-0.0037153	0.00189471	-0.00399685	-0.000745602	-0.000586667
msp_0931	unclassified Clostridiales	-3.14569e-05	0	-0.000202422	0	-0.00016163	0	-0.000169587	0.00043961	-0.00011768	-0.000755671	-0.00064695	-0.000250075	0.000317629	-3.9906e-05	4.41881e-05	0.000180884	0.00336652	-9.09695e-05	0.000139451	0	0	0	4.56182e-05	-0.000102997	-0.000123421	-0.000221848	0.000665595	-0.000329104
msp_0932	unclassified Firmicutes	-0.000135788	-5.3663e-05	-0.000515651	0	0.000310264	0	0.000330132	0.000292205	3.86119e-05	0.000237467	-0.000227594	6.61142e-05	0.000658959	-2.0977e-05	0.000155655	0.000355297	3.50637e-05	0.000111842	-0.000106507	0.000423953	8.72433e-05	0	6.6197e-05	0.000128397	-0.000252155	-0.00022135	-0.000107819	0.000191556
msp_0933	unclassified Blautia	0.000190402	-0.000205856	0	0	0.000150345	0	0	0	-9.89193e-05	-3.58259e-05	1.37361e-05	0	0	-5.06881e-05	1.20686e-05	0.000102809	-4.27858e-05	-0.000160906	0	0	0	0	0	5.50663e-05	0	-0.000178549	-6.47791e-05	0
msp_0934	Bacteroides salanitronis	0	0	0	0	0	0	0	0	0	3.22161e-05	0	0	-2.87217e-05	0	0	0	0	0	0	0	0	0	0	0	0	-4.59179e-05	0	0
msp_0935	Peptostreptococcus anaerobius	0.000594738	0	0	0	7.94236e-05	0	0.000144518	0	4.02105e-05	0.000268422	0	3.02755e-05	0	0	0.000101921	0	0	0.000443555	7.63611e-05	0	0	0	0	2.8009e-05	0	-0.000108785	0.000113167	0
msp_0936c	Helicobacter winghamensis	0	0	0	0	0	0	0	0	0	0	0	0	0	0	0	0	0	0	0	0	0	0	0	0	0	0	0	0
msp_0937	unclassified Burkholderiales	3.54203e-05	0.000181169	0	0	3.68361e-05	0	0	0	2.96999e-05	0	1.37847e-05	0.000134912	0.000466913	0	0	0	0	0	0	0	0	0	0	0	0	6.02126e-05	0	0
msp_0938	Firmicutes bacterium CAG:536	-6.35474e-05	0	0	0	0	0	0	-0.000215781	-2.89891e-05	0	-5.52752e-05	-0.000385196	0	0	0	0	8.95558e-05	0	0	0	0	0	0	0	0	0	0	0.000161111
msp_0939	unclassified	4.17001e-05	-1.32564e-05	0	0	-3.76515e-05	0	0.00122977	0	3.00323e-05	0	5.70735e-05	-0.000189497	-4.97547e-05	5.95966e-05	3.31918e-05	0.000504885	3.69028e-05	0	0	0	0	0	3.28964e-05	0	0	0	4.83883e-05	-0.001055
msp_0940	unclassified Eggerthella	0.000129995	0	0	0	7.45216e-05	0	0	-0.000143691	0	0	4.20636e-05	0	0	0	0	6.03827e-05	0	0	0	0	0	0	0	0	0	7.21049e-05	0	0
msp_0941	unclassified	0	0	0	0	0	0	0	-0.000165995	0	0	9.30412e-05	2.37855e-05	0	0	-5.01673e-05	0	0	-7.05898e-05	0	0	0	0	0	0	-5.41376e-05	0	8.24191e-05	0
msp_0942	unclassified Eggerthellaceae	-0.000127551	0.000474276	0	0	0.00011059	0	0	-0.000822832	-4.45694e-05	0.00039169	0.0012133	0.000219901	-0.00015236	0	0	0.000987591	0.00115598	3.82078e-05	0.000714802	0	0	0	7.91808e-05	0.000268867	0.000117356	0.000522129	0.00124249	0.000459153
msp_0943	unclassified	0	0	0	0	-0.000161472	0	0	-0.00027695	0	5.34182e-05	-0.00274078	9.393e-05	-4.0782e-05	0	0	0	4.08488e-05	0	0	0.000164783	0	0	0	0	0	0.000662412	0	0
msp_0944	unclassified	3.6688e-05	0	0	0	0	0	0.000216489	6.69631e-05	0	0.000125402	4.71291e-05	0.00016768	0	0	0	0.000320103	0	0	7.76734e-05	0	0	0	6.33701e-05	0	0	0	0.000116052	0
msp_0945	unclassified Coprococcus	0.000332167	0.000240973	0	0	-0.000633036	-0.000889124	0.000311859	0.000358332	-0.000234206	0.000507514	-0.000429928	0.000898499	0.00105736	-0.000515769	-0.000416511	-0.000290139	0.00038704	-0.00286534	-0.00039569	0	0	0	-0.00170225	-0.000387648	-0.000340545	9.5144e-05	-0.000344171	0
msp_0946	Collinsella intestinalis	-0.000190463	0.00128565	0	0	-0.000457783	-2.55774e-05	7.28028e-05	0	-0.000416385	0	0	-0.000137428	0.000172071	-6.81721e-05	6.30389e-05	0	6.05172e-05	-0.000181998	0	0	6.15956e-05	0	0.000137847	-0.000120598	0.000168111	0	-3.66405e-05	0
msp_0947	Clostridium sp. 26_22	1.92466e-05	0	0.000703119	0	-0.000700189	-5.94567e-05	0.000337095	0.00036428	-9.82808e-05	0	-0.00257272	9.04518e-05	-0.00023522	3.98892e-05	0.000216027	-0.000426344	-0.000182373	-0.000156041	-0.000190355	0	7.46568e-05	0	-0.00017141	0.000178954	0	6.16383e-05	0	0.000144444
msp_0948	unclassified Prevotella	0	0	0	0	-7.99742e-05	0	0	0	-9.99972e-06	-3.79254e-05	9.85183e-06	0	0	0	0	0	0	0	0	0	0	0	0	0	0	0	0	0
msp_0949	unclassified Erysipelotrichaceae	5.39589e-05	2.24774e-05	0	0	0.000265924	-0.000112232	0	0.000130627	0.000114247	-0.000159613	-0.000487993	0	-0.00010201	1.82209e-05	0	-0.000156415	7.92088e-05	-0.000253873	0.000238571	0	0	0	-0.000175195	-3.32156e-05	0	0	-0.000109802	0.000175755
msp_0950c	Sanguibacteroides justesenii == Gabonibacter massiliensis	8.61442e-06	0.000184737	-0.00176612	0	0.000254881	0	0	-0.000103856	-8.3875e-05	0	-0.000111701	-0.0009337	9.66585e-05	4.34045e-05	0	3.80891e-05	0.000442732	0	6.3928e-05	0	0	0	0	0.000170836	0.000222052	0	0.00113004	-0.00028939
msp_0951	unclassified Alistipes	-1.05915e-05	0	0	0	0	0	0	0	0	0.000140496	-0.000220624	0.000158968	0	0	-0.000212086	-5.40895e-05	0	0	0.000110135	0	0	0	0	0	0	0	0	0
msp_0952	Agathobaculum desmolans	0	0	0	0	4.89653e-05	0	0	0	0	0	0	0	0	0	0	0	0	0	0	0	0	0	0	0	0	-4.9559e-05	-0.00013035	0
msp_0953	unclassified Ruminococcaceae	-1.1566e-05	9.62276e-05	8.50344e-05	0	-4.30087e-05	-3.52943e-05	7.73941e-05	0.000447199	1.06377e-05	-0.000766898	-0.000868861	-0.00368442	-0.00070209	-7.69651e-06	0.000198576	0	0.000130295	-4.66195e-05	-0.000182219	0	0	0	0	-5.33482e-05	-6.45837e-05	0.000804737	0.000296146	0.00022328
msp_0954	unclassified Burkholderiales	0	0	0	0	0	0	0	0	0	0	1.30435e-05	0	0	0	0	0	0	0	0	0	0	0	0	0	0	0	0	0
msp_0955	Firmicutes bacterium CAG:345	0	0	0	0	-3.7828e-05	0	0	8.94764e-05	0	0	-0.00731518	-2.49867e-05	0	0	-9.88302e-05	0	0	-2.99351e-05	0.00246787	0	0	0	0.000117532	-1.05464e-05	0	0	0	0.000744764
msp_0956	unclassified Fusobacterium	0	0	0	0	0	0.000168149	0	0	3.92493e-05	0	0	0	0	0	-0.000233973	0	0	0	0	0	0	0	0	-7.99321e-05	0	0	0	0
msp_0957	unclassified Firmicutes	0	0	0	0	0	0	0	0.000112793	0	0	-1.21179e-05	-2.48088e-05	0	0	9.09312e-05	0	0	0	0	0	0	0	0	0	0	0	0	0
msp_0958	unclassified Flavonifractor	0	0	0	0	0	0	0	0	0	0	0	0	0	0	0	0	0	0	0	0	0	0	0	1.8409e-05	0	-0.000110504	-6.8101e-05	0
msp_0959	unclassified	6.05354e-05	0.000213649	-0.00261591	-0.000738248	-0.00100705	-8.83469e-05	0.000613274	-0.000455241	-0.000298631	0.00059737	0.000226015	-0.00203759	0.000745947	-0.000200491	-0.000384908	-0.000163463	0.000243349	-0.00226193	-0.000816782	0	0	0	-0.000598169	0.000322052	-0.000292794	-0.000124985	0.000865175	0.000427988
msp_0960	unclassified	0	0	-0.000428537	0.00130583	-0.0006237	0	0	0.000677218	0	-0.000194877	0.000309978	-9.69581e-05	-4.25264e-05	0	0	-0.000243012	-0.000350476	0	0.000114595	0	0	0	-0.000201482	0	0	0	0.000230158	0
msp_0961	unclassified Clostridiales	0	0	-0.000677549	0	-0.000432984	-5.14599e-05	-8.94621e-05	-8.08937e-05	0.000113173	0	-7.93837e-05	-3.36049e-05	7.42111e-05	-0.000295743	8.78805e-05	6.14037e-05	-0.000203872	-0.000330286	0	0	0	0	0	0.000177008	0	0	3.0131e-05	-0.000335791
msp_0962	unclassified Anaerotruncus	1.5509e-05	0	0	0	4.92199e-05	0	0	0	0	0	-2.50238e-05	-0.000305393	-5.67973e-05	0	6.08133e-05	0	0	0	0	0	0	0	0	0	0	0	-4.92274e-05	0
msp_0963c	Campylobacter hominis	-9.93323e-06	0	-0.000341153	0	3.55157e-05	-0.000163376	0	0	1.22951e-05	0	5.07045e-05	-0.000247693	-5.21672e-05	0	0.000793655	0.000126669	7.90259e-05	0	0.000322746	0	0	0	9.20752e-05	-0.000202007	-7.0784e-05	0	0	0
msp_0964	Clostridium sp. CAG:571	-1.57973e-05	0	9.8355e-05	0	-3.83362e-05	0	0.000560895	0	9.66175e-05	0	-4.24554e-05	0	3.93982e-05	-3.38561e-05	0	0	-4.89199e-05	-6.20259e-05	0	0	0	0	0	2.85342e-05	0	0	-7.44971e-05	0
msp_0965	unclassified Oscillibacter	1.80405e-05	0	0	0	0.00026444	0	0	-0.000198626	0	0	-0.000226572	0.00011295	5.80949e-05	0	0	0	0.00010257	2.97848e-05	-4.67352e-05	0	0	0	0	-9.80418e-06	0.000123365	0	2.27319e-05	0
msp_0966	unclassified Clostridiales	0	0	0	0	0	0	0	0.00010664	0	0	-6.9168e-05	0	0	0	0	0	0	0	0	0	0	0	0	1.04671e-05	4.74843e-05	0	0	0
msp_0967	unclassified Sutterella	5.78972e-05	0.000131451	-9.07927e-05	0	-0.000121075	0	0	0	-1.0941e-05	6.30415e-05	-3.84929e-05	0	0	1.36664e-05	0	0	0	2.89331e-05	0	0	0	0	0	2.7853e-05	-4.48027e-05	0	6.85521e-05	0
msp_0968c	Veillonella magna	0	0	0	0	0	0	0	0	-0.000264569	0	0	0	0	0	0	0	0	0	0	0	0.000154612	0	0	-0.000126908	0	0	0	0
msp_0969	Olsenella sp. Marseille-P2912	-8.23194e-05	0	0	0	0	-0.00017118	0	5.50936e-05	-7.72732e-05	8.79218e-05	7.29682e-05	0.000219732	0.000269182	0	-2.22299e-05	0.000266371	0	-6.57274e-05	-0.000166564	0	0	0	0	0	0	0	0.000112225	0
msp_0970	Collinsella bouchesdurhonensis	-0.000450611	0.000176156	0	0	0.000573559	0	0	-0.000574271	-1.99031e-05	0.000222574	0.00115315	0.000176953	0.000599914	0	1.88869e-05	0.00105807	0.00202002	-0.000181511	0	0	0	0	0.000111012	-1.80061e-05	0	-0.000482184	0.000224712	0
msp_0971	Bacteroides sartorii	0	0	0	0	3.24041e-05	0	0	0	-6.85794e-05	0	0	0	0	0	0	0	0	0	0	0	0	0	0	0	-4.91617e-05	0	0	0
msp_0972	unclassified Prevotellaceae	0	0	0	0	0	0	0	0	0	0	0	0	0	-2.37819e-05	0	0	0	0	0	0	0	0	0	0	0	0	0	0
msp_0973	unclassified Firmicutes	-1.11379e-05	-2.57275e-05	0.000157905	-0.000193529	0	0	0	0	0	0	8.27072e-05	-7.51104e-05	0	0	0	0	8.06012e-05	0	0	0	0	0	0	0	0	0	0	0
msp_0974c	Gemella sanguinis	-0.000655328	0.000155382	-0.000734687	-0.000317664	0.000182543	0.000164703	0.000688834	0.000479606	0.00122763	-5.86278e-05	-0.00072124	-0.00402121	-0.000727674	0.00022077	-0.000385044	-0.000533494	0.000361654	-0.0028589	0.000374859	-0.000221805	0	0	0	0.000480234	0	-0.000452584	-0.00064913	0.000154074
msp_0975	unclassified	0	0	0	0	0	0	0	0	0	0	3.72441e-05	0	0	0	0	0	0	0	0	0	0	0	0	0	0	0	0	0
msp_0976	unclassified Firmicutes	3.78645e-05	0	0	0	-0.00012217	0	0.000392171	-0.000169094	-2.74493e-05	-0.000585778	-0.000258206	0.000131444	-0.000202455	-5.42238e-05	0.000198214	-0.000418409	-0.000450768	0	0.00035736	0	0	0	3.59981e-05	-3.96726e-05	8.09968e-05	0.000872679	0.00046814	0
msp_0977	Flavonifractor sp. 2789STDY5834895	-0.000714325	0.00191777	-0.00059506	0.00212751	0.000866181	-0.000213671	0.000465013	0.00102583	-0.000840967	-0.000335198	0.0015267	0.00355707	0.00128228	-0.00418185	0.00495755	0.00227499	0.000776392	-0.000194722	-0.000757233	0	0.00118508	-0.000954167	-0.000995194	0.00140002	-0.000196637	-0.00227624	-0.00158705	0.000629218
msp_0978	unclassified Firmicutes	-0.000108106	0.000360211	0	0	0	0	0	-9.47676e-05	0	0.000194192	0.000137733	5.22238e-05	5.66227e-05	0	0	0	0	0	0.000220595	0	0	0	0.000137048	0	0	0	0.000145049	0
msp_0979	unclassified Clostridiales	0.00015841	0.000516145	0.000880801	0	-0.000327458	0.000210288	0.000366077	0.000220137	0.00059286	0.000175732	0.000330964	-0.000551145	0.000926329	-8.75855e-05	-0.000702875	-0.000119745	-0.000286272	-0.000329292	-0.000735572	0	7.74736e-05	0	-0.000291095	0.000213664	0.000146324	0.000528558	8.26751e-05	0
msp_0980	unclassified Prevotella	-4.66387e-05	0	0	0	0	0	0	0	-1.71468e-05	0	0	0	0	0	0	7.33215e-05	0	0	0	0	0	0	2.77945e-05	0	0	0	0	0
msp_0981	unclassified Holdemanella	-1.90318e-05	-3.32482e-05	0	0	-0.000213583	0	-7.24981e-05	0	-4.72275e-05	0	9.85794e-06	6.40527e-05	-7.83484e-05	-1.65133e-05	-1.32972e-05	0	0	-0.000207905	0	0	0	0	0	3.33694e-05	0	0	0	0
msp_0982	unclassified	-9.53158e-05	-1.45174e-05	-0.000836434	-0.00021047	-5.85561e-05	0	0	0.00109569	-2.00977e-05	-0.000191366	-0.000126288	0.000156492	0	-1.27647e-05	0	0	0	0	-4.27509e-05	0.00109284	0	0	0	0	0	-8.00239e-05	8.84079e-05	0
msp_0983	Streptococcus lutetiensis	9.43295e-05	-2.5557e-05	-0.000463382	0	2.99411e-05	0	0	4.8738e-05	1.095e-05	0	0	-0.00108034	-6.60358e-05	-4.95814e-05	-2.83031e-05	0.000244624	5.60338e-05	0	0	0	0	0	0	0	0	0	0.000452118	0
msp_0984	unclassified Burkholderiales	6.80807e-05	0.000370441	0	0	0	0	0	0	-0.000190383	0	6.16159e-05	-4.58985e-05	-6.23507e-05	0.000118865	0	0	0	0	0	0	0	0	0	0	0	0	0	0.000398074
msp_0985	Mycoplasma sp. CAG:472	0	0	-0.000521007	0	-0.000196524	0	0.000550514	0	0	0	-0.000152372	8.53128e-05	-0.000178866	-5.13825e-05	-0.000163905	0.00398132	-6.16962e-05	0	-0.000200889	0	0	0	0	1.8993e-05	0.000276633	0	0	0
msp_0986	Coprococcus catus	0.000840618	0.000655491	-0.00113854	-0.000676923	0.00106889	-0.00204362	0.000742692	-0.000535666	-0.000460826	0.000333641	0.000450944	0.000910655	0.00107869	-0.00259128	-0.0024295	-0.000635304	0.000584986	0.00116075	0.00105475	0.00111485	0.000915599	0	-0.00394338	-0.000702461	0.00180345	-0.000695353	0.00254526	-0.001123
msp_0987	unclassified Bacteroides	2.6057e-05	3.32242e-05	0	0	0	0	0	0	0	0	0	0	0	0	0	0	0.000155538	0	0	0	0	0	0	0	0	0	-3.41572e-05	0
msp_0988	unclassified Oscillibacter	-0.000121857	2.13056e-05	0	0	0	-0.000155725	-0.00011724	0	0.00016578	0	3.82358e-05	-0.000107526	0	-0.000384341	-0.000107801	0	0.000171326	-0.000310967	-0.00055511	0.000552038	0.000282607	0	0	-0.000342835	-0.000139086	0.000253566	0	0
msp_0989	unclassified Coprococcus	0	0	0	0	0	0	0	0	0	0	-0.000147414	0	7.34156e-05	0	0	7.37642e-05	0	0	0	0	0	0	0	0	0	0	0	0
msp_0990	unclassified	-2.0218e-05	0.00028206	9.09341e-05	0	0.000277699	0	0	0	-0.000119076	0.000417474	-0.000110779	0.000141417	0	0	2.81243e-05	-3.82829e-05	0	0.000206055	0	0	0	0	0	2.72943e-05	0	0	-0.000199333	0.000177222
msp_0991	unclassified Bacteroidales	0	0	0	0	0	0	0	0	0	0.000187187	0	0	0	0	0	0	0	0	0	0	0	0	0	0	0	0	0	0
msp_0992	unclassified Euryarchaeota	8.79235e-05	0	0	0	0.00017818	0	0	0	0	0	-4.04489e-05	-0.000133433	-0.000217958	0	0	0	0	0	0	0	0	0	0	0	0	0	0	0
msp_0993	unclassified Clostridiales	0	0	-9.21675e-05	0	-0.000260705	0	7.22326e-05	0.000173255	2.62485e-05	0	-0.00121459	0	0	-3.68476e-05	-5.55835e-05	5.39819e-05	0	0	0	0	3.0848e-05	0	0	6.392e-05	0	0	1.73855e-05	0
msp_0994	unclassified Selenomonas	0	0	0	0	0	0	0	0	0	0	1.32194e-05	-6.70902e-05	-7.41788e-05	0	0	0	0	0	0	0	0	0	0	0	0	-4.03761e-05	0	0
msp_0995	unclassified Lachnospiraceae	0	0	0	0	0	0	0	0	0	0	0	4.3806e-05	0	0	0	0	0	-2.22621e-05	0	0	0	0	8.77902e-05	0	0	0	0	0
msp_0996	unclassified Firmicutes	1.15852e-05	0	0	0	0	0	0	0	0	0	3.75581e-05	0	0	0	0	0	-2.74742e-05	0	0	0	0	0	0	6.84545e-05	0.000163787	0	0	0
msp_0997	unclassified Prevotella	0	0	0	0	0	0	0	0	0	0	0	0	0	0	-2.08744e-05	0	0	0	0	0	0	0	0	8.94442e-06	-4.36718e-05	0	0	0
msp_0998	unclassified Brachyspira	0	0	0	0	7.22269e-05	0	0	0	0	0	0	0	0	0	0	0	0	0	0	0	0	0	0	0	0	0	0	0
msp_0999	Collinsella stercoris	-1.95838e-05	5.30502e-05	0	0	0	0	0	0	-6.14377e-05	0	-8.35968e-05	0	7.5118e-05	0	0	0	-1.5162e-05	0	0	0	0	0	5.17871e-05	0	0	-0.000324072	-5.85143e-05	0
msp_1000	unclassified Bacteroides	0	0	0	0	0	0	0	0	0	0	5.40439e-05	0	0	0	0	0.00011289	0	0	0.000119051	0	0	0	0	0	0	0	0	0
msp_1001	unclassified	-2.54862e-05	-3.65073e-05	-0.000358469	0	-0.000213392	0	0	0.00256683	0	0.00154813	0.000141754	0.00140066	-0.000590234	0	0	-0.000104046	-0.000156172	2.82983e-05	0.00022636	0	0	0	0	9.96399e-06	0	0	0.000242894	0
msp_1002	unclassified Clostridiales	-1.03566e-05	0	0	0	0	0	0	0	0	0	0	0	0	0	0	0	0	0	0	0	0	0	0	0	0	0	0	0
msp_1003	Eubacterium sp. CAG:841	0	0	0	0	0	0	9.3405e-05	0	0	-3.4349e-05	-2.26252e-05	0	0	0	0	0	0	0	0	0	0	0	0	0	-0.000295069	0	0	0
msp_1004	unclassified Clostridiales	-3.86109e-05	0	0	0	-3.99541e-05	0	0	7.02491e-05	0	-5.64723e-05	0	0	5.96726e-05	0	0	0	0.000533865	0	0	0	0	0	-0.000293058	0	0	0	-6.0687e-05	0
msp_1005	Clostridium sp. CAG:508	0	0.000111089	-0.00283013	0	-0.00010719	0	0	0	0	0.000492976	-0.000399124	0.000112813	6.16053e-05	0	-4.89396e-05	0	0.000140072	0	0	0	0	0	-3.62995e-05	-7.52913e-05	0.000164191	0	0	0.000251556
msp_1006	Lactobacillus fermentum	-0.000584557	0.000146683	-0.000317608	0	0.000631027	0	0.000148461	0	0.00312887	0.000356089	0	5.48967e-05	8.46363e-05	0.00280746	-0.00018803	9.33337e-05	-0.00104678	8.40433e-05	0.000201953	-0.000404282	0	0	0	7.40976e-05	0	0.000141972	-0.000147202	0
msp_1007	Coprobacillus sp. CAG:698	0	0	0	0	0	0	0	0	0	0	-0.000286958	0	0	0	0	0	0	0	0	0	0	0	0	0	0	0	0	0
msp_1008	unclassified Firmicutes	-4.64501e-05	-0.000162516	0	0	0	0	0	0	0	0	-2.00716e-05	3.6461e-05	8.90422e-05	0	0	0	0	-9.94355e-05	0	0	0	0	0.000106524	0	0	0	-3.17424e-05	0
msp_1009	Senegalimassilia anaerobia	-0.000282524	-5.45487e-05	0.00019064	0.000854312	0.000811985	0	0.00151817	-0.00259311	-8.60855e-05	0.000400173	0.00201565	0.000261176	0.00114378	6.08743e-05	-0.00153294	-0.000487633	0.00207206	0.000114642	0.000194763	0	6.62476e-05	0	-0.000133128	0.00015404	0.000408026	-0.000235342	0.00074402	-0.000450809
msp_1010	unclassified Clostridiales	0	0	0	0	-0.000157176	0	0	0	0	0	-0.000159707	0	0	4.19636e-05	0	0	0	0	0	0	0	0	0	0	0	0	-0.000105559	0
msp_1011	Clostridium sp. CAG:557	0	0	0	0	0	0	0	-0.000190741	0	0	-0.00181333	0	0	0	0	0	0	0	0	0	0	0	0	0	0	0	0	-0.000182236
msp_1012	Intestinimonas massiliensis	0.000300682	-0.000265669	-0.00286037	0	-0.00123423	-0.000189171	-0.000435383	0.00632181	-0.000387535	0.00251284	0.000416428	0.000761782	-0.00064511	-0.000279709	0.000820804	0.000279541	0.000657228	0.000253547	-0.000387006	0.00014963	-0.000279463	0	0.00350798	0.000714817	0.000657077	-0.00080982	-0.000574995	-0.00365458
msp_1013	unclassified Firmicutes	-0.00034467	0.00114113	0	0	9.81122e-05	0	0.0010953	-0.000328784	-0.000100545	0.00178589	-0.000169141	-5.50206e-05	0.000313526	-0.000112184	0.000597048	0.000166269	0.000642873	0.000301741	-0.000448362	0	0	0	0.000123972	0.000154365	-9.35434e-05	-0.00116353	0.000345146	0.000486467
msp_1014	unclassified Prevotella	0	0	0	0	0	0	0	0	0	0	-9.66029e-05	0	0	0	0	0	0	0	0	0	0	0	0	0	0	0	0	0
msp_1016	unclassified Firmicutes	0	0	0	0	0	0	0	-0.000123609	0	0	0	0	0	0	0	0	0.000170093	0	0	0	0	0	0	1.84929e-05	0	-5.04873e-05	0	0
msp_1017	unclassified Clostridiaceae	-1.13226e-05	0	0	0	0	0	0	0	0	0.000127584	0.00018988	0.00014219	0.000132578	0	0	0.000363751	0	0	0	0	0	0	0	0	0	6.22325e-05	-0.000173099	0
msp_1018	Candidatus Methanomethylophilus alvus	2.5318e-05	0	0	0	0	0	0	0	0	0	3.36253e-05	0	0	4.8999e-05	0	0	-6.52927e-05	0	0.000103656	0	0	0	0	0	0	0	0	0
msp_1019	Oxalobacter formigenes 1	-7.90531e-05	5.37913e-05	0	0	0.000147439	-4.21778e-05	0.000971011	0	-0.00227246	0.000202334	-6.46427e-05	4.77274e-05	0	-0.000790732	-0.000491128	0	4.39756e-05	0.00038649	6.10113e-05	0	0.000214977	0	-3.6697e-05	-0.000646143	-0.000175905	7.4975e-05	0	0
msp_1020	unclassified Clostridiales	0	4.51916e-05	0	0	-0.000112295	0	0	-0.000133237	0	0.000329073	1.31665e-05	0	0	-3.22708e-05	6.65057e-05	0	0	0	0	0	0	0	0	0	0	0	0	0
msp_1021	unclassified Clostridiales	0.000605504	0.000596806	-0.000700794	-0.000827635	-0.000816572	-0.000120873	0.000557494	0.00313851	0.00034736	-0.00139251	0.000612394	0.000280255	0.000662226	-0.000877466	-0.00150615	-0.00165858	-0.000859015	-0.000418043	-0.000724911	0	0.000777756	0	-0.00127759	-0.000428084	0.000394043	-0.000742956	0.000485362	-0.000190556
msp_1022	unclassified	-9.73622e-05	-5.64066e-05	0	0	-3.44972e-05	0	0.000279224	0.00013638	8.51328e-05	-0.00010167	-0.000549879	0.000113429	0.000167159	-2.41138e-05	0.000141854	0.000189932	4.51629e-05	0	0.000533058	0	0	0	7.23767e-05	-1.37711e-05	0.000153991	-7.9335e-05	-0.000349801	0.000328444
msp_1023	unclassified Candidatus Gastranaerophilales	0	0	0	0	-3.80917e-05	0	0	-9.97468e-05	0	0	-9.59776e-06	0	0	0	0	0	0	0	0	0	0	0	0	0	0	0	0	0
msp_1024	unclassified Negativicutes	0	0	0	0	-0.000136555	0	0	0	0	0	-1.41374e-05	0	0	0	0	0	0	0	0	0	0	0	0	0	0	0	0	0
msp_1025	unclassified	-3.38407e-05	2.70724e-05	0	0	0	0	0	0	0	0	2.2875e-05	0	0	0	0	0	0	0	0	0	0	0	0	0	0	0	0	0
msp_1026	unclassified Alistipes	0	0	0	0	0	0	0	0	1.38528e-05	0	-1.65732e-05	-2.8943e-05	0	0	0	0	0	0	0.000205217	0	0	0	0	0	0	0	0	0
msp_1027	unclassified Clostridiales	-1.13594e-05	0	0	0	-0.000630009	0	0	0	0	0	-0.00149049	0	-4.89917e-05	0	0	0	-4.20265e-05	0	0	0	0	0	0	0	0	0	0	0
msp_1028c	Prevotella intermedia	0.00102699	0	0	0	0.00044918	0	0	0	0	9.93521e-05	0	0.000193764	0	0	0	7.15142e-05	0	0.00130482	3.80968e-05	0	0	0	0	0	0	0	0	0
msp_1029	unclassified Clostridiales	0	0	0	0	0	0	0	0	0	0	-2.55666e-05	0	0	0	0	0	0	0	0	0	0	0	0	0	0	0	0	0
msp_1030	unclassified Clostridiales	0	0	-0.000171317	0	-4.98708e-05	0	0	0	0	0	3.1007e-05	5.29075e-05	0	0	0	0	0	0	-7.96714e-05	0	0	0	5.05141e-05	0	0	0	0	0
msp_1031	unclassified Proteobacteria	-2.05692e-05	0	0	0	-8.36141e-05	0	0	-7.87108e-05	0	0	6.69017e-05	-4.52942e-05	6.62048e-05	0	0	0.000223323	6.32309e-05	0	0	0	0	0	-2.95116e-05	0	0	0	0	0
msp_1032	unclassified Firmicutes	0.000109182	0.000663664	0.000843708	0	0.000155559	-7.09782e-05	0	-0.00046789	0.000288839	0.000236863	-0.000602456	-6.89822e-05	-0.000296045	-4.89575e-05	-0.00197988	8.35442e-05	0.00225526	9.44934e-05	-0.000277167	0	0	0	3.84248e-05	-0.00041417	0	0.000405996	0.000907458	-0.00107079
msp_1033	Clostridium sp. CAG:273	0.000652595	-0.000113209	0.000674869	0.000767331	-0.00186286	0	0	-0.000148987	0	0.000110022	-0.000828924	-0.000633076	0.000109581	0	1.16915e-05	-0.000577836	-0.000267282	0	0.000141261	0	0	0	-0.000369295	9.6267e-06	0	-0.000182343	0.00251121	0.000423333
msp_1034	Anaeroglobus geminatus	0.000150522	-0.000189667	0	0	0	0.000623329	0	0	0.000162509	0.000224777	0	0	0	0.00328188	-8.62641e-05	0	8.4486e-05	-7.1919e-05	0	0.000104511	0	0	0	0.000383901	0	0.000445591	0	0
msp_1035	Mobilibacterium timonense	0	0	0	0	0	0	0	0	0	0	0	0	0	0	0	0	0	-2.91442e-05	0	0	0	0	0	0	0	0	0	0
msp_1036	unclassified Dialister	0	0	0	0	0	0	-6.48702e-05	0	8.95042e-05	0	0	0	0	3.36276e-05	3.52088e-05	0	0	-0.000139175	0	0	-0.000281375	0	0	5.01861e-05	-5.12004e-05	0	0	0
msp_1037	unclassified Clostridiales	-9.23606e-06	0	0	0	0	0	0	0	0	0	-0.00172709	-0.000575647	-8.24235e-05	0	-1.95625e-05	0	0.000170323	0	0	0	0	0	0	0	0	0	0	0.000260889
msp_1038	Blautia sp. 2789STDY5608796	-6.96516e-05	0	-0.00047147	0	-0.00489069	0	0.000154512	-0.000586957	4.74861e-05	0.000114066	-0.000645925	-0.000429949	-0.000592515	0	6.77628e-05	-0.000180613	0.00133015	-0.000126827	-0.00118381	0.00233876	0	0	-0.000186282	-3.78119e-05	0.000150265	0.000275682	0.000415398	0
msp_1039	unclassified Ruminococcaceae	-0.000148502	-8.59424e-05	0	0	0.000200182	0	0	6.61975e-05	5.06922e-05	-6.02909e-05	-0.000245536	-0.000160605	0	0.000194009	0	0.000328622	-3.37855e-05	-0.000121338	-0.000246032	0	0	0.00075	5.69093e-05	2.01078e-05	-9.34409e-05	0	-6.27092e-05	0
msp_1040c	Colibacter massiliensis	6.10096e-05	0	0	0	0	0	0	0	0	0	0	0	0	0	0	0	0	0	0	0	0	0	0	0	0	0	0	0
msp_1041	unclassified Blautia	2.78174e-05	0	0	0	0	0	0	0	-1.066e-05	0	0	0	0	0	0	0	0	0.000149851	0	0	0	0	0	2.30559e-05	0	0	0	0
msp_1042	unclassified	-7.30808e-06	0	0	0	-0.00011122	0	0	0	1.84735e-05	4.13766e-05	-0.00022262	6.475e-05	-0.000101966	-7.766e-05	-2.78072e-05	0	-6.754e-05	-0.000161966	0.000259741	0	0	0	0	0.000250732	0	0	7.04851e-05	0
msp_1043	Mycoplasma sp. CAG:611	1.095e-05	0	0	0	-0.000144599	0	0.000216737	0	1.1269e-05	0	-0.000496822	-0.00135443	0	-5.70851e-05	7.54551e-05	0.000158565	4.77668e-05	0	0	0	0	0	3.46835e-05	6.17296e-05	0	0	3.54209e-05	0
msp_1044	unclassified Fusobacterium	-3.35558e-05	0.000207091	0	0	0	0	0.000202435	0	-1.33459e-05	0	0	0	0	0	3.74771e-05	0	0	0	0	0	0	0	-8.99161e-05	0.000115539	-4.938e-05	0	0	0
msp_1045	Prevotella sp. CAG:1320	0	0	0	0	0	0	0	0	0	7.79731e-05	0	2.48679e-05	8.31863e-05	0	0	0.000180511	0	0	0	0	5.38121e-05	0	0	0	0	-4.04863e-05	0	0
msp_1046	Clostridium sp. 7_2_43FAA	-0.000139935	0	0	0	0	1.91237e-05	0	0	-0.000149673	4.89667e-05	0	0	0	0.000111688	8.1891e-05	0	0	0	-9.86705e-05	0	0	0	0	0.000100435	0	0	0	0
msp_1047	unclassified Firmicutes	-2.56433e-05	-1.14774e-05	0	0	-0.000178595	0	0	-5.95353e-05	0	-4.29992e-05	-0.000851634	-0.00010418	-0.000470165	-3.26394e-05	0	0	0.000149819	0.0001048	0	0	0	0	0	4.3871e-05	0	0	0	-0.000219403
msp_1048	unclassified Lachnoclostridium	0.000232323	9.24272e-05	0	0	-0.000372813	0	0	0	0	0.000493566	3.02118e-05	4.61609e-05	0	0	0	4.16724e-05	0	4.38299e-05	0	0	0	0	7.03073e-05	0	0.000294806	0.000366308	-4.937e-05	0
msp_1049	Clostridium sp. CAG:451	-7.26962e-05	-1.3355e-05	0.000205119	0	5.87531e-05	-4.01692e-05	-0.000296809	0	-3.7628e-05	0	0.000107329	-0.000301326	-0.000204349	-5.43906e-05	-0.000587479	0.000305954	-0.000137354	0	7.917e-05	0	2.56431e-05	0	4.05913e-05	2.26451e-05	-4.86814e-05	-4.31024e-05	0	-0.000151111
msp_1050	unclassified Clostridiales	0	0	0	0	0	0	0	0	0	3.48267e-05	-7.5402e-05	0	0	0	0	0	0	0	0	0	0	0	0	0	0	0	0	0
msp_1051	unclassified Gordonibacter	9.7367e-05	8.58409e-05	0	0	-0.000611089	0.000108644	-0.000225382	0	-0.0002765	0.000125257	-0.00035927	-0.000914551	0.000293139	3.9819e-05	-0.000313331	9.03153e-05	-3.50972e-05	-0.000370858	7.23277e-05	0	0	0	0	-0.000157705	0.000255288	0.000270204	0.000125052	0
msp_1052	Bacteroidales bacterium 52_46	0	0	0	0	0	0	0	0	0	0	8.1861e-05	0	0	-1.95643e-05	0	0	0	-0.000301495	0	0	-0.000394994	0	0	0	0	5.58353e-05	0	0
msp_1053	unclassified Firmicutes	-1.13967e-05	0.000327754	0	0	0	0	0	0	0	-0.000252049	4.68844e-05	9.04894e-05	0	0	0	4.54684e-05	0	0	0	0	0	0	0	0	0	0	0	0
msp_1054	Clostridium sp. CAG:780	0	7.4577e-05	0	0	0	0	0.000325142	-0.000649977	3.21053e-05	0	-0.000342667	5.50661e-05	0.000271636	-8.3728e-05	-0.000477177	6.12088e-05	0.000118132	9.32717e-05	0	0	5.52966e-05	0	0	0.000128347	0	0	0	0
msp_1055	unclassified Roseburia	0	0	0	0	-9.3633e-05	0	0	0	0	0	0	-2.63712e-05	-3.62359e-05	0	0	0	0	-2.66035e-05	0	0	0	0	0	0	0	0	0	0
msp_1056	unclassified Burkholderiales	0	0	0	0	0	0	0	0	0	0	0	2.51464e-05	0	0	0	0	0	0	0	0	0	0	0	0	0	0	0	0
msp_1057c	Peptoniphilus lacrimalis	4.37775e-05	-1.52136e-05	0	0	-4.70653e-05	-0.000240935	0	0	2.46011e-05	7.69445e-05	0	0	-6.07349e-05	-3.02964e-05	-0.000177078	-5.11619e-05	-0.000135491	0.000100289	-3.9256e-05	0	0	0	0	0.00012049	0	0	4.21716e-05	0
msp_1058c	Proteus mirabilis 2	0	0	0	0	0	0	0	0	3.87804e-05	0	1.50743e-05	0	0	0	0	0	0	0	0	0	0	0	0	3.04123e-05	0	0	6.18809e-05	0
msp_1059c	Lactobacillus gallinarum	0	0	-0.000245058	0	0	0	0	0	3.16794e-05	0	0	0	4.00875e-05	0	0	0	0	0	0	0	0	0	0	2.32412e-05	0	0	0	0
msp_1060c	unclassified Flavonifractor	0.00158428	-0.000192949	0.00112929	-0.00106814	-0.00138878	-0.00020634	-0.000316285	0.00985971	-0.00123052	-0.000416553	-0.000485098	0.00409429	0.00111308	-0.000152649	0.000246249	0.00159473	0.0010942	-0.000530838	0.00108491	-0.00022445	0	-0.000541667	0.00220946	-0.000276759	0.000464654	-0.00165883	0.000924362	0.0013272
msp_1061c	unclassified	0	0	0	0	0	0	0	0	0	0	1.61451e-05	0	3.68011e-05	0	0	-3.22551e-05	-3.78954e-05	0	0	0	0	0	0	0	0	0	0	0.000260635
msp_1062	unclassified Oscillibacter	0.000240052	0	-0.000477162	0	-0.0014921	0	0.000471743	0.000410149	-0.000181867	-0.000368867	-0.000802429	-0.000210158	0.00140501	-0.000782829	-0.00146621	0.000258839	0.000128899	-0.00190525	0.0003064	-0.000101504	-0.000155713	0	-0.000110964	-0.000587276	0.000744139	0.000893349	-0.000467088	0.000571857
msp_1063c	Peptostreptococcus sp. MV1	0	0	0	0	0	0	0	0	0	0	0	2.43915e-05	0	0	-0.000110537	0	0	0	0	0	0	0	0	0	0	0	0	0
msp_1064	unclassified Negativicutes	0	0	0	0	0	0	0	0	0	0	0	0	0	0	0	0	0	0	0	0	0	0	0	0	0	0	0	0
msp_1065	unclassified Firmicutes	0	0	0	0	0	0	0	0	0	7.21935e-05	0	-3.79153e-05	4.67643e-05	0	0	0	0	0	0	0	0	0	0	0	0	0	0	0
msp_1066	unclassified Clostridiales	0	0	0	0	-0.000396096	0	0.000160983	0	0	0	-2.25436e-05	8.37196e-05	0	-4.08482e-05	0	4.63476e-05	0	0	4.211e-05	0	0	0	0	-3.70633e-05	0	0	6.88276e-05	-0.000976984
msp_1067	unclassified	0	0	0	0	0	0	0	0	0	0	-2.59472e-05	0	0	0	0	0	0	0	-7.35519e-05	0	0	0	6.9871e-05	0	0	0	0	-0.000166349
msp_1068	Clostridium sp. CAG:524	0	0	0	0	-5.53059e-05	0	0	0	0	5.02377e-05	-9.83722e-05	0	0	0	0	0.000106423	0	0	0.000173046	0	0	0	0	0	0	0	0	0
msp_1069	unclassified Clostridiales	0	0	0.00021833	0	-0.000391971	0	9.53286e-05	0.00285816	1.89229e-05	0	-0.000638501	3.43777e-05	0.000201171	-0.000206033	-8.74585e-05	-0.000320891	5.6649e-05	-7.47881e-05	-0.00012201	0	7.54117e-05	0	-2.92654e-05	-5.80303e-05	0	7.80979e-05	0	0.000272889
msp_1070	Butyricicoccus pullicaecorum	-0.0011567	-0.000131463	0	0.00133419	-6.57388e-05	-0.000247632	0	0	-0.000117691	0	0	0	0	-0.000107435	0.000169928	0.000529511	0	3.06818e-05	0	0	0	0.00152674	0	-0.000236689	0	0.00024689	-0.000335582	0
msp_1071	Coprobacillus sp. CAG:826	0	0	0	0	0	0	0	0	0	0	2.5363e-05	0	0	0	0	0	0	0	0	0	0	0	0	0	0	0	0	0
msp_1072	unclassified Firmicutes	1.22591e-05	8.14876e-05	0	0	0	0	0	0.00123708	0	0	-0.000221323	9.2135e-05	0	0	0	0	0.00012092	0	0	0	0	0	-0.000115852	0	0	0	0	0
msp_1073	unclassified	0	0	0	0	-0.000216685	0	0	0	0	0	0	0	0	0	0	0	0	0	0	0	0	0	0	0	0	0	0	0
msp_1074	unclassified	0	0	0	0	0	0	0	9.70942e-05	0	0	-0.00104829	0	0	-1.05958e-05	0	0	0	-2.92185e-05	0	0	0	0	0	3.02335e-05	0	-7.49599e-05	0	0
msp_1075	unclassified	0	0	0	0	0	0	0	0	0	0	6.6318e-05	0	0	0	0	0	0	0	0	0	0	0	0	0	0	0	0	0
msp_1076	unclassified Bilophila	-0.000247978	0.000225345	0	0	-2.22284e-05	-2.89679e-05	0	-5.92685e-05	9.83548e-06	0.000108011	-5.20592e-05	0	0	0	1.56318e-05	0	0	7.12549e-05	0.00019682	0	0	0	-4.57806e-05	5.68333e-05	-0.000147473	0.00067513	0.000546424	-0.000114815
msp_1077	unclassified Lachnospiraceae	0.000222873	0	0	0	0	0	0.000789443	0	0.000214111	0	-0.000418287	0	0	-7.85247e-05	8.35523e-05	0	0	0	0	0	0	0	0	0.000241886	0	0	0	0
msp_1078	unclassified Clostridiales	0.000827233	-9.35441e-05	0	0	0.000100505	0	0.000175197	0	1.0619e-05	0	-0.000274319	0.000320939	0.000411458	-3.90381e-05	6.21897e-05	4.79766e-05	0	3.1598e-05	0.000551763	0	-0.000105144	-0.000760417	-0.000248774	7.48723e-05	0	-0.00033779	-0.00021044	-0.000458272
msp_1079	unclassified	-7.39114e-06	0	0	0	0	0	0	-6.20949e-05	0	5.44182e-05	0	4.09649e-05	-3.29464e-05	0	0	0	0	0	0	0	5.20025e-05	0	0	0	0	0	0	0
msp_1081	Fusobacterium gonidiaformans	-1.15313e-05	0	0	0	-3.14559e-05	3.48115e-05	0	0	0	0	-3.09969e-05	0.000104535	0	3.66673e-05	-3.2731e-05	0	0	0	-3.73788e-05	0	0	0	0	3.33688e-05	0	-0.00011466	3.66509e-05	0
msp_1082	unclassified Acidiphilium	0	0	0	0	0	0	0	0	0	0	-9.34431e-06	0	3.80003e-05	1.54604e-05	0	0	0	0	0	0	0	0	0	9.58433e-06	0	0	0	0
msp_1083	unclassified Alistipes	0	0	0	0	0	0	0	0	0	0	0	0	0	0	0	0	0	2.32299e-05	0	0	0	0	0	-0.000138534	9.96624e-05	0	0	0
msp_1084	Eubacterium sp. ER2	-4.20391e-05	0	0	0	0	3.07451e-05	0	0	-2.40075e-05	-6.90541e-05	1.28814e-05	-9.30796e-05	0	0	0	0	-5.72813e-05	-4.64863e-05	3.81793e-05	0.00143292	0	0	0	0	0	0	-5.22893e-05	0
msp_1085	unclassified Oscillibacter	-8.13204e-06	0.000672313	0	0	-3.65638e-05	0	-5.50968e-05	0.00157255	-8.99278e-06	0	-0.000377415	0.000149009	9.57223e-05	0	1.57377e-05	0.000453657	4.07581e-05	4.04138e-05	0	0	0	0	0	-9.17551e-06	0	0	-0.000175778	0
msp_1086	unclassified	1.95897e-05	0	0.000102093	0	0	0	0	-6.45437e-05	0	-0.000169239	-0.000396884	-3.73263e-05	-0.000128772	0	-9.05438e-05	0	0	0	0	0	0	0	0	1.23001e-05	0	0	0	-0.000287778
msp_1087	unclassified Mailhella	3.54147e-05	0	6.72482e-05	0	0	0	0	0	-1.43966e-05	0.000119991	3.78559e-05	-7.03363e-05	0	-1.47358e-05	4.68501e-05	0	-4.41221e-05	0	0	0	-0.000430786	0	0	-8.02462e-06	0	-6.58943e-05	-7.93772e-05	-0.000242857
msp_1088	unclassified Sutterellaceae	2.34225e-05	0	0	0	3.82384e-05	2.51043e-05	0.00014501	0	-9.94102e-05	0	0	-2.8562e-05	0	-6.47834e-05	0	0	0	0	0	0	0	0	0	-2.13193e-05	0.000106565	3.98649e-05	0	0
msp_1089	Lactobacillus casei == paracasei	0.000455605	3.71369e-05	-0.000255231	0	-0.000138822	0	0	0.000265608	0	-0.000230687	-1.40391e-05	-0.000535449	-0.000340956	0	0.000258505	-0.000577665	-0.000679383	-0.000193674	-0.000201368	0	0	-0.000304167	0.000693645	9.48854e-05	0	0.000147253	-0.000177136	0.00135675
msp_1090	unclassified	-0.000339725	0.00129211	0	0	0.00017097	0	0	-0.00124371	-0.000377523	-6.28682e-05	-0.00039986	4.00735e-05	-0.000307175	-1.75595e-05	5.72963e-05	0.00029268	0.000530725	0.000393624	-0.000266774	-9.96241e-05	0	0	0.000406332	-6.49533e-05	0	0.000426648	0.00343616	0
msp_1091	unclassified Firmicutes	0	0.000153368	0	0	-6.12684e-05	0	8.97622e-05	0	-0.00018621	0	0	0	7.51648e-05	4.41492e-05	-1.48538e-05	0	-3.76273e-05	0.000284232	0	0	0	0	0	9.88065e-05	0.000161414	0	0	0
msp_1092	unclassified Burkholderiales	1.68231e-05	0	0	0	0	0.000120829	0	0	-0.000856625	0	0	0	0	0.000146175	0	0	0	3.60361e-05	0	0	0	0	0	0.000153534	0	0	0	0
msp_1093	Clostridium sp. 27_14	-0.000125996	0.000280891	7.79958e-05	0	-0.000199146	2.21811e-05	0.00174644	-7.90543e-05	4.85995e-05	-0.00029223	0.000321749	-0.000251415	-0.00011545	-7.35756e-05	-0.000165269	0.000240527	0.00024617	-0.000211488	0.000217963	0	-0.000169322	0	-9.28252e-05	-0.000293512	0.00013384	0	0.000215433	-0.000888889
msp_1094	unclassified Firmicutes	7.59897e-05	0	-0.000913633	0	0.000284492	0	9.17867e-05	0	0.000406151	9.76329e-05	0.000190003	-0.000525797	-0.00012334	0.000165897	0.00011441	0.00010752	4.84331e-05	0.000160565	0	0	0	0	-8.49114e-05	0.000189438	0.000173432	5.78135e-05	0	0.00066569
msp_1095	unclassified Bacteria	0	0	0	0	0	0	0	-6.30835e-05	0	0	-0.000190699	0	0	0	0	0	0	0	0	0	0	0	0	0	0	0	0	0
msp_1096	unclassified Firmicutes	0	0.000151373	0	0	0	0	0	0	0	5.20332e-05	-3.31809e-05	0	0.000110989	0	0	0	0	0	0	0	0	0	-0.000159306	0	0	0	0	0
msp_1097	unclassified	-1.29159e-05	2.1539e-05	0	0	0	0	0	-0.000313803	0	0.000152752	6.91628e-05	0.000153533	0	0	0	0	0	0	0.000158493	0	0	0	0	0	0	0	-6.3044e-05	0
msp_1098	unclassified Clostridia	-1.12554e-05	0	0	0	-0.000124511	0	0	-0.000130193	0	0.000175326	-0.000174113	-0.000115257	0.000147788	0	0	0.00033623	-0.000100834	-5.3535e-05	0	0	0	0	0	0	0	0.000260479	0	-0.000279111
msp_1099c	Bifidobacterium thermacidophilum	0	0	0	0	0	0	0	0	0	0	0	0	0	0	0	0	0	0	0	0	0	0	0	0	0	0	0	0
msp_1100	unclassified Clostridiales	2.90425e-05	0.000253371	9.2737e-05	0	0	0	0.000313485	0.0013525	-6.93508e-06	0.000152386	0.00023077	7.05831e-05	-4.82714e-05	0	-7.95295e-05	-0.000516179	0.000339705	-0.000169969	-0.000214104	0.00016488	0	0	-0.000107709	-9.58271e-06	0	-5.13005e-05	5.02235e-05	-0.000384068
msp_1101	Firmicutes bacterium CAG:631	9.07408e-06	0	0	0	-0.000153996	0	0	0.000247002	0	0.000122629	-0.000242554	0.000113788	0	0	0	8.91294e-05	7.88183e-05	0	0	0	0	0	-6.10178e-05	0	0	-4.13394e-05	0	0
msp_1102	Firmicutes bacterium CAG:552	0	0	-0.00012407	0	-8.32025e-05	0	0	0	0	0	-0.000254751	-0.000101305	0	0	0	0	0	0	0	0	0	0	0.000138857	0	0	0	0	-0.00015619
msp_1103	unclassified Firmicutes	-9.69629e-06	-1.59124e-05	0	0	0	0	0	4.56257e-05	0	0	0	0	0	0	0	0	0	0	0	0	0	0	0	0	0	0	-3.33333e-05	0
msp_1104	unclassified	0	0	0	0	0	0	0	0	0	0	0	0	0	0	0	-3.50561e-05	0	0	0	0	0	0	0	0	0	0	0	0
msp_1105	unclassified Oscillospiraceae	0	0	0	0	0	0	0	7.01711e-05	9.52781e-06	0	-1.48493e-05	0	0	0	0	0	0	0	0	0	0	0	0	0	0	0	0	0
msp_1106	unclassified Prevotella	0	0	0	0	0	0	0	0	0	0	0	0	0	0	0	0	0	0	0	0	0	0	0	0	0	0	0	0
msp_1107	Bacteroides sp. CAG:1060	0	5.69322e-05	0	0	0	0	0	0	0	0.0002149	2.70735e-05	0	0	0	0	-0.000141836	0	0	0	0	0	0	0	0	0	0	0	0
msp_1108	unclassified Bacteroidales	0	0	0	0	0	0	0	0	0	0.000595531	0	-2.96864e-05	7.55151e-05	0	0	0	0	0	0	0	0	0	0	0	0	0	0	0
msp_1109	unclassified Clostridiales	0	0	0	0	0	0	0	0	0	0	-3.96617e-05	0	0	0	0	0	0	0	-3.11175e-05	0	0	0	0	0	0	0	-0.000199976	0
msp_1110	Coprobacillus sp. CAG:605	0	0	0.000344974	0	-0.000279737	0	0	0	0	0	-0.000247805	0	-8.80983e-05	0	0	-0.000105229	-0.000166878	0	0	0	0	0	0	2.02773e-05	0	0	0	-0.000332667
msp_1111	Clostridium sp. CAG:568	0	0	-0.000122937	0	-3.2035e-05	0	0	0.000228147	-0.000162955	0	-0.000110503	0.000137319	0	-2.86427e-05	-8.48944e-05	0.000497416	0.000343704	-3.12158e-05	0.000434101	0	0	0	0.000119108	0	0	0.000259301	0.000158238	-0.000559658
msp_1112	Mycoplasma sp. CAG:956	0	0	0	0	0	0	0	0	0	0	-0.000101863	0	0	0	0	0	-3.12234e-05	0	0	0	0	0	0	0	0	0	0	0
msp_1113c	Firmicutes bacterium CAG:822	0	0	0.000115934	0	0	0	0	0	0	0	0	0	0	0	0	0	0	0	-8.55113e-05	0	0	0	0	0	0	0	0	0
msp_1114	Allisonella histaminiformans	0.000769393	0.00152055	0.00113906	0	0.000296771	5.41192e-05	0.000568575	-0.000207298	-0.00262226	0	-0.000218918	0.000669036	0.000500339	0.000163481	-0.000813754	-0.000203877	0.00150067	-0.00129476	0.00123791	0	-0.000366984	0	-0.000432871	0.000847578	0.000431542	-0.000148991	0.000186965	0.000281744
msp_1115	unclassified	0	0	0	0	0	0	0	0	0	0.00014876	9.67468e-05	6.42121e-05	0.000114031	0	0	3.56675e-05	0	0	0	0	0	0	0	0	0	0	0	0
msp_1116	unclassified Proteobacteria	3.00784e-05	0	-0.000119927	0	0	0	0	0	0	0	4.23812e-05	0	-3.27914e-05	0	0	3.86636e-05	0	0	0	0	0	0	0	0	0	0	3.81064e-05	0
msp_1117	unclassified	0	0	0	0	0	0	0	0	0	5.29969e-05	-2.79636e-05	-4.12463e-05	0	0	0	0	0	0	0	0	0	0	0	0	0	0	0	0
msp_1118	unclassified Lachnospiraceae	0	0	-0.000862894	0	6.6269e-05	0	0	0	0	0	-4.30614e-05	0	0	0	1.25403e-05	0	0	0	0	0	0	0	0	0	0	0	0	0
msp_1120	unclassified Lachnospiraceae	0.000125053	0.0005609	0	0	-0.000595324	0	0	0	0	0	3.6781e-05	2.40208e-05	9.98773e-05	8.20107e-05	0.000150968	3.72865e-05	6.40964e-05	0	-6.23776e-05	0	0	0	0	-1.0038e-05	4.20436e-05	0.00020694	4.03495e-05	-0.000178889
msp_1121	unclassified Lachnospiraceae	0	0	0	0	0	0	0	0	0	0	0	0	0	0	0	8.32015e-05	0	0	0	0	0	0	0	0	0	0	0	0
msp_1122	Firmicutes bacterium CAG:582	0	0	0	0	0	0	0.000231032	0	0	0	-0.000169956	-0.000352611	-4.62612e-05	0	0	0	0	0	0	0	0	0	7.26761e-05	1.53771e-05	0	0	0.000102381	0
msp_1123	unclassified Firmicutes	0	0	0	0	0	0	0	7.44172e-05	-2.30497e-05	0	-1.4112e-05	0	0	0	0	0	0	0	0	0	0	0	5.56167e-05	-6.4859e-05	0	0	0	0
msp_1124	unclassified Lachnospiraceae	0	0	0	0	5.46933e-05	0	0	0	2.77222e-05	0	0.000107298	0.000126138	0.00210512	0	0	0	0	0	0	0	0	0	0	0	0	0	0	0
msp_1125	Eggerthella sp. CAG:368	0	5.92171e-05	0	0	0.000298252	0	0	-0.000361979	1.57718e-05	-4.62215e-05	0.000138009	0.000131969	0.000425747	0	-4.88012e-05	0.000434963	0.00154176	0	-4.95521e-05	0	0	0	0	2.92099e-05	0	6.18727e-05	-4.21829e-05	-0.00127881
msp_1126	Prevotella corporis	3.46583e-05	8.88496e-05	0	0	0	-0.000169543	0	-8.99049e-05	0.000236271	0	0.00012149	0	0	8.7201e-05	-0.000166655	0.000393356	3.54545e-05	-0.000203128	7.03273e-05	0	-4.41643e-05	0	4.2673e-05	-0.000237895	0.000108457	0	3.11695e-05	0.000161111
msp_1127	Streptococcus anginosus	0.00105437	-0.000206872	-0.000898971	-0.000325804	0.000517725	6.17656e-05	0.000286933	0.000606428	0.00718282	0.00254603	3.95127e-05	-0.00048621	-0.000416528	0.0146899	-0.000374641	-0.000935305	-0.000785537	0.00110085	0.000716694	-8.17043e-05	0	0	0	0.00543443	0	-0.000367098	0.000487312	-0.000412
msp_1128	unclassified Butyricicoccus	5.29413e-05	-0.000231291	-0.000111555	0	-5.13936e-05	-0.000110522	-0.000199074	0	8.39173e-05	-8.16893e-05	5.80792e-05	-0.000585078	-0.000604249	-0.00033658	-0.000512748	0.00268503	0.000217056	-0.000210488	-0.000159094	0	-0.00106172	-0.002	0	-0.000116114	0.000639121	0.000100678	0	0
msp_1129	unclassified Clostridiales	0	-3.80796e-05	0	0	9.83693e-05	0	0	0	0	0	-2.31816e-05	-3.59251e-05	-5.59391e-05	0	4.42132e-05	0	0.00085412	0	0	0	4.5903e-05	0	0	-1.0748e-05	0	0	0	-0.000152593
msp_1130	unclassified Bacteroidales	1.07948e-05	0	0	0	0	0	0	0	0	0	0	0	0	0	0	0	0	0	0	0	0	0	0	0	0	0	0	0
msp_1131	unclassified Eggerthella	0	0	0	0	0	0	0	0	0	0	1.17584e-05	-0.000405827	0.000530613	0	0	5.29807e-05	0	2.97244e-05	8.64579e-05	0	0	0	0	0	0	0	0	0
msp_1132	unclassified	4.96745e-05	0	0	0	-0.000438062	0	0	7.12635e-05	0	0.000341159	-0.00084113	7.28331e-05	0.000106159	0	0	-0.000211258	0.000307197	9.18076e-05	0	0	0	0	0.000133871	0	0	0	0.000549685	0
msp_1133	unclassified	0	0	0	0	0	0	0	-5.93791e-05	0	4.245e-05	-8.79627e-05	0	0	0	0	-4.17065e-05	0	0	0	0	0	0	0	0	0	0	0	0
msp_1134	Clostridium sp. CAG:798	1.15635e-05	0	0	0	0	0	0	0	0	-0.000122651	6.4999e-05	0	0	0	-2.26517e-05	0	-0.000156865	0	0	0	0	0	0	0	0	0	0.00013704	0.000796803
msp_1135	unclassified Clostridiales	0	0	0.000226301	0	-3.18047e-05	0	0	0	0	0	-0.000234598	0	0	0	0	0	0	0	0	0	0	0	-0.000260832	0	0	0	0	0
msp_1136	unclassified Clostridiales	0	0	0	0	0	0	0	0	0	0	0	0	0	0	0	4.29028e-05	0	0	0	0	0	0	0	0	0	0	0	0
msp_1137	unclassified Blautia	-1.97465e-05	0	0	0	0	0	0	0	0	0	2.96026e-05	-2.42919e-05	-2.69681e-05	0	0	0	0	0	0	0	0	0	0	0	0	0	0	0
msp_1138	Clostridium sp. CAG:628	9.39287e-06	0	0	0	0	0	0.00026748	0	0	0	0.000135334	0	0	0	-4.96363e-05	0	3.81238e-05	0	0	0.000155707	0	0	0	1.23656e-05	0.000199811	5.02295e-05	0	0.000887209
msp_1139	Clostridium sp. CAG:389	0	0	0	0	0	0	0.00035852	8.6372e-05	0.000140418	0	-0.00144507	-0.000419991	-0.000115269	0	0.000145232	-0.000248495	-7.20101e-05	-0.000627895	0	0	6.0886e-05	0	0	0.000211431	5.73643e-05	0	4.10026e-05	0
msp_1140	unclassified Gordonibacter	0	0	0	0	0	-7.3136e-05	-9.24027e-05	0	-5.99186e-05	0	0	6.04549e-05	0.000128813	0	9.10025e-05	0	0	0	0	0	-0.000263337	0	0	0	0	0	3.56446e-05	0
msp_1141	Mycoplasma sp. CAG:877	0	0	0	0	0	0	0	0	0	0	-0.000145945	0	0	0	0	7.19737e-05	0	0	0	0	0	0	0	9.51129e-06	0	0	0	0
msp_1142	unclassified Olsenella	0	0	0	0	0	0	0	0	0	0	-4.20442e-05	0.000130034	0	0	0	0	0.000273781	0	0	0	0	0	0	0	0	0	0	-0.000192593
msp_1143	unclassified Oscillibacter	-0.000438384	0.00078501	-0.00102616	0	-0.00343597	-0.00195958	-0.00132647	-0.000864811	-0.00404193	-0.000409842	0.00063937	0.000140687	0.00089437	-0.00174596	0.00243548	0.000574251	-0.000400724	-0.00656543	-0.00382158	0.000809864	0.000456954	0	-0.000879466	-0.0013762	-0.000610053	-0.000489704	0.000655049	0.000263704
msp_1144c	Bacteroidales bacterium M7	-1.31443e-05	0	0	0	0	0	0	0	0	0	0	0	0	0	0	0	0	0	0	0	0	0	0	0	0	0	0	0
msp_1145	unclassified Firmicutes	0	0	0	0	0	0	0	0	0	0	0	0	0	0	0	3.29591e-05	0	0	0	0	0	0	0	0	0	0	0	0
msp_1146	unclassified Firmicutes	0	0.000635214	0	0	0	0	0	0	0	0	-1.31477e-05	8.08164e-05	0	0	0	0	0	0	0	0	0	0	0.000227841	0	0	0	0	0
msp_1147	unclassified	0	0	0	0	0	0	0	0	0	0	-2.24435e-05	0	0	0	0	0	0	0	0	0	0	0	-6.76301e-05	0	0	0	0	0
msp_1148	unclassified Bacteroides	0	0	0	0	0	0	0	0	0	0	1.2328e-05	0	0	0	0	0	0	0	0	0	0	0	0	0	0	0	0	0
msp_1149	unclassified Clostridiales	0	0	0	0	-2.51988e-05	0	0	0	0	0	-1.09838e-05	0	0	0	0	0	-3.33054e-05	0	0	0	0	0	0	0	0	0	0	0
msp_1150	unclassified Clostridiales	0	0	0	0	0	0	0	0	0	0	1.80209e-05	0	0	0	0	-5.29526e-05	0	0	0	0	0	0	0	0	0	0	0	0
msp_1151	unclassified Gammaproteobacteria	-5.09037e-05	0	0	0	0	0	0	0	0	0	0	0	0	0	0	0	3.00389e-05	0	0	0	0	0	0	0	0	0	0	0
msp_1152	unclassified Burkholderiales	2.15556e-05	0	0	0	0	0	0	0	0	0	0	6.37049e-05	3.39281e-05	0	0	0	0	0	0	0	0	0	0	0	0	0	0	0
msp_1153	unclassified Dialister	0	0	0	0	0	0	0	0	0	0	0	-9.66011e-05	9.76848e-05	0	0	0	0	0	0	0	0	0	-0.000104045	0	0	0	0	0
msp_1154	unclassified	0	0	0	0	-0.000120816	0	0	0	0	0	-2.95611e-05	0	0	0	0	0	0	0	0	0	0	0	0	0	0	0	0	0
msp_1155	Bifidobacterium angulatum	0	0	0	0	0	0	0	0	0	0	-0.000225494	-0.000188829	-0.000122148	0	-4.9133e-05	0.000513312	0	0	0	0	0	0	3.84556e-05	0	0	0	0	0
msp_1156	Solobacterium moorei	0.00950206	0.000276295	0.000108926	0	0.00579944	-0.000288194	0.00112642	-0.00135399	0.00486682	0.00409125	-0.000333273	0.00186007	-0.000566292	6.35838e-05	0.000303688	0.00234375	0.00150952	0.00592902	-8.94338e-05	0	0	0	0	-0.000333222	0	-0.000598033	0.00950057	0
msp_1157	unclassified Clostridiales	0	0	0	0	-0.00017682	0	0	0	8.80455e-06	0	-0.000118717	2.35727e-05	0	0	0	0	0	0	0	0	0	0	4.45601e-05	3.42301e-05	0	0	0	0
msp_1158	Porphyromonas somerae	4.32664e-05	0	0	0	0	0	0	0	2.07229e-05	0.00132167	5.67547e-05	0.00027097	0	0	5.67745e-05	0.00265989	0	3.76537e-05	0	0	0	0	-0.000122462	8.88069e-06	0	0	9.83571e-05	0
msp_1159	unclassified Collinsella	-1.2176e-05	0	-0.000131158	-0.000274929	0	-0.000381337	6.02462e-05	0	0.000211876	4.94527e-05	2.99632e-05	-0.000122358	0.000430329	0	-1.33693e-05	0.000110131	0.000150083	-0.00016544	0	0.00100885	0	0	0	-3.49305e-05	0	0.000176839	0.000355246	0
msp_1160	Clostridium sp. CAG:533	0	0	0	0	0	0	0	0.000134414	0	-5.14563e-05	-0.00021811	0	0	0	0	0	-3.58064e-05	0	0	0	0	0	0	0	0	0.000135761	0	0.000941943
msp_1161	unclassified Clostridiales	0	0	0	0	0	0	0	0	0	0	0	0	0	0	0	0	0	0	0	0	0	0	0	0	0	0	0	0
msp_1162	unclassified Firmicutes	0	0	0	0	8.71209e-05	0	0	0	0	0	1.81758e-05	-8.66369e-05	0	0	-3.03232e-05	-4.1728e-05	0	0	0	0	0	0	0	-9.73911e-06	0	0	0	0
msp_1163	unclassified Clostridiales	0	0	0	0	0	0	0	0	0	0	-2.54241e-05	0	0	0	0	0	0	0	0	0	0	0	0	0	0	0	0	0
msp_1164	Faecalibacterium sp. CAG:1138	0	0	0	0	0	0	0	0	0	-4.6508e-05	-5.16783e-05	0	0	0	0	0	0	0	0	0	0	0	0	0	0	0	0	0
msp_1165	unclassified	0	0	0	0	0	0	0	0	0	0	-0.000283393	0	0	0	0	0	0	0	0	0	0	0	0	0	0	0	0	0
msp_1166	unclassified Acidiphilium	0	0	0	0	0	0	-0.000181496	-0.000213763	0	0	-8.94891e-05	0	0	2.54475e-05	0	0	0	-6.83808e-05	0.000134983	0	2.90019e-05	0	-8.29101e-05	9.57143e-06	-0.000197894	0	0	0
msp_1167	unclassified	0	0	0	0	0	0	0	0	0	0	-7.67178e-05	0	0	0	0	0	0	0	0	0	0	0	0	0	0	0	0	0
msp_1168	Peptoniphilus harei	-0.000101486	0	0	0	8.8317e-05	4.63907e-05	0	0	3.56663e-05	-4.36481e-05	0	0.000103818	-6.71947e-05	1.60773e-05	-8.93807e-05	-4.1234e-05	0	0.000115682	-0.000222899	0	0	0	0	6.86618e-05	0	9.72349e-05	0.000125667	0
msp_1169c	Sphaerochaeta sp. Phil3	0	0	0	0	0	0	0	0	0	0	0	0	0	0	0	0	0	0	0	0	0	0	0	0	0	0	0	0
msp_1170	Clostridium sp. CAG:609	0	0	0	0	-7.54604e-05	0	-6.78326e-05	0	0	0	0	-7.08501e-05	-3.36084e-05	0	0	0	0	8.31271e-05	0	0	0	0	0	8.53505e-06	0	0	0	0
msp_1171	unclassified	3.72736e-05	-1.9165e-05	0	0	-0.000362602	0	0.000168539	0	-1.37218e-05	0.000121256	-0.000524408	4.01707e-05	0.000120125	0.000106058	0.000276878	7.57379e-05	0.000361012	5.90035e-05	0	0	0	0	-7.69025e-05	0.000132322	0	0.00016272	-0.000126473	0
msp_1172	unclassified Firmicutes	0.000327856	0.000681969	0	0	-0.000380313	0	0	0.00271532	2.41702e-05	0.00142479	-0.000287764	0.000499762	-0.000243917	0	9.75608e-05	0.000723409	-0.000128688	-0.000117896	0	0	0	0	0.000348063	0	0	-5.39228e-05	0.000137712	0.000719683
msp_1173c	unclassified Clostridiales	0.00118218	0.000459614	0	0	-0.000767964	-0.00150236	-0.00068426	0.000272278	0.000556564	-0.000275275	0.00100747	0.000250435	0.000977341	-0.00459052	0.00114782	0.00198379	0.000666339	-0.000683868	-0.000842028	0	-0.000608256	0.00110625	0.00102235	0.00509232	0.00141529	0.000699789	0.00186285	0.000719786
msp_1174	unclassified Prevotella	1.22064e-05	0	0	0	0	0	0	0	-9.27359e-05	0	0	0	0	0	0	3.00658e-05	0	0	0	0	0	0	0	0	-4.25144e-05	0	0	0
msp_1175	unclassified Clostridiales	0	0	-0.000373403	0	0	0	0	0	9.83009e-06	0	-6.39589e-05	0	0	0	3.38461e-05	0	0	0	0	0	0	0	0	0.000123343	0	0	0	0
msp_1176	unclassified Clostridiales	0	0	0	0	0	0	0	-7.88252e-05	0	9.26235e-05	-0.000246154	-0.000272478	6.52211e-05	0	1.10771e-05	0.000547101	0	0	0	0	0	0	0	0	0	0	0	0.000116667
msp_1177	unclassified Firmicutes	0.000216943	-0.000326235	-0.000550231	0	0.000855364	-7.75646e-05	0.000233099	0.00103805	-0.000182996	-0.000131524	0.000515329	0.00405818	0.000585994	2.75411e-05	0.00447329	-0.000195286	9.42739e-05	0.000849133	0.00391245	0	0	-0.000489583	0.00110347	0.000498981	-0.000111717	-3.31781e-05	0.000956079	0.00037884
msp_1178	unclassified Muribaculaceae	0	0	0	0	0	0	0	0	-7.58276e-06	0	0	4.18492e-05	0	0	0	0	0	0	0	0	0	0	0	0	0	0	0	0
msp_1179	unclassified Clostridiales	0	0	0	0	0	0	0	0	0	0	-9.32927e-05	0	0	0	0	0	0	0	0	0	0	0	0	1.94386e-05	0	0	0	0
msp_1180	unclassified Firmicutes	0	0	-0.000353006	0	-0.000543641	0	0.00140358	5.43076e-05	1.3664e-05	-5.66262e-05	-5.56703e-05	0	5.47928e-05	3.64915e-05	-0.000627759	0.000890208	-9.41023e-05	6.50254e-05	0.000118158	0	3.12832e-05	0	-0.000115455	6.43446e-05	-3.69567e-05	0	0	0.000132593
msp_1181	unclassified Clostridiales	0	0	0	0	0	0	0	0	0	0	4.49767e-05	3.57297e-05	0.000134913	0	0	0	-6.23241e-05	0	0	0	0	0	-0.000214798	0	0	0	6.24236e-05	0
msp_1182	Verrucomicrobia bacterium CAG:312_58_20	0	0	0	0	0	0	0	0	0	8.00071e-05	-0.000213472	2.99073e-05	0.000244207	0	-1.46982e-05	0	0	0	0	0	0	0	0	-2.12612e-05	-5.92077e-05	0	0	0
msp_1183	unclassified Clostridiales	-1.72807e-05	0	0	0	0	0	0	0	5.07227e-05	5.05935e-05	-1.64103e-05	0	0	0	0	0	0	0	0	0	0	0	0.000104686	-3.77905e-05	0	0.000173253	0	0
msp_1184	unclassified Clostridiales	0	0	0	0	2.8763e-05	0	0	0	0	0	0.000128202	0	0	0	0	0	0	0	0	0	0	0	0	0	0	0	0	0
msp_1185	unclassified Clostridiales	-1.23612e-05	0	-0.000811173	0	0	0	-6.98219e-05	0	-1.1245e-05	0	-0.000110818	0.000112622	0	-2.42865e-05	-8.62722e-05	0	0.000176961	0	-4.61163e-05	0	0	0	0	2.42398e-05	0	0	0.000196248	-0.000163492
msp_1186	Corallococcus sp. CAG:1435	0	0	0	0	0	0	0	0	0	0	-2.77515e-05	-2.88823e-05	-2.88197e-05	0	0	0	8.16901e-05	0	0	0	0	0	4.63699e-05	0	0	0	0	0
msp_1187	Bacillus sp. CAG:988	0	0	0	0	0	0	0	6.15665e-05	0	0	-5.0601e-05	2.30565e-05	0	0	0	8.6893e-05	0	0	-3.1628e-05	0	0	0	-0.000119005	0	0	0	-3.04178e-05	0
msp_1188	unclassified Clostridiales	6.2177e-05	0.00013681	-0.0016498	0.000877564	0.000307381	0	0	0.000104229	1.22855e-05	-0.000103975	-3.38458e-05	4.55973e-05	0.000678975	0	0	9.16271e-05	8.75488e-05	6.08541e-05	0	0	0	0	-0.000109446	-1.50305e-05	0	0.000433872	0.000999118	-0.000380854
msp_1189	unclassified Clostridiales	0	0	0	0	6.69036e-05	0.000134095	0	0	-4.21647e-05	0	2.02565e-05	0	5.68532e-05	-5.89664e-05	0.000134154	0.00016599	0	0.000110849	-9.40595e-05	0	0	0	-0.000162555	-2.90247e-05	-0.000112827	0	0	0
msp_1190c	Streptococcus sp. UBA632	0	0	0	0	0	-3.14148e-05	0	0	3.07042e-05	0	0	0	0	0	1.97887e-05	0	0	0	0	0	0	0	0	-2.47073e-05	0	0	0	0
msp_1191c	Atopobium parvulum	0.000260875	-4.64838e-05	0	0	0.000235977	2.79873e-06	0.000227194	0	0.000379524	-3.12265e-05	0	6.26331e-05	0	3.83583e-05	4.07827e-05	-4.23195e-05	-8.47727e-05	6.34477e-05	0	0	0	0	0	-5.28935e-05	0	-4.48201e-05	3.75988e-05	0
msp_1192	unclassified	0	0	0	0	0	0	0	-8.18831e-05	0	0	0	0	0	0	0	0	0	0	0	0	0	0	0	0	0	0	0	0
msp_1193	Dialister pneumosintes	0.00555664	-9.1951e-05	0.000140921	0	0.000845422	0.000290809	0	0	-0.000138308	0.000540003	0	0.00506195	0	0.00170218	-6.56983e-05	0.00123502	0	0.00156689	0	0	0	0	0	8.49548e-05	-4.07056e-05	-0.000207615	0.000260685	0
msp_1194	unclassified Lachnospiraceae	0	0	0	0	3.72904e-05	-0.000133567	0	0	-2.22808e-05	0	-6.79511e-05	0	0	0	0	0	0	-0.00014285	0	0	0	0	-0.000181602	5.48298e-05	0	0	0	0
msp_1195	unclassified Firmicutes	6.16129e-05	0	0	0	0.000204978	-3.22619e-05	-0.000214019	-0.000312366	-0.000116097	-4.82374e-05	0.00029012	-0.000263254	-0.000226855	4.01801e-05	-0.000228077	0.000995242	0.00015337	-7.44322e-05	-0.00010197	0	0	0	0	-7.81774e-05	0	0	-4.5312e-05	0.000464444
msp_1196	Lactobacillus crispatus	0.000115754	0.000118557	0	0	0	0	0	0	0.000614009	9.43482e-05	0	-0.000118669	0.000201007	0.000652808	-9.5597e-05	2.11199e-05	-5.82088e-05	0	-7.39498e-05	0	0	0	0	0.000121253	0	0	0.000201257	0
msp_1197	unclassified	0	3.7154e-05	0	0	0	0	0	-0.000175074	0	0	2.72069e-05	3.95057e-05	-5.80108e-05	0	0	0	0	0	0	0	0	0	0	0	0	0	0	0
msp_1198	Clostridium sp. CAG:575	0	0	0	0	-0.000149407	5.05066e-05	0	-0.0002279	1.61333e-05	0	-2.66228e-05	0	0	-1.64279e-05	0.0001157	0	0	3.35588e-05	0	0	0	0	0	5.23091e-05	-5.12435e-05	0	0	-0.000168783
msp_1199	unclassified Firmicutes	0	0	0	0	0	0	0	0	0	0	1.93308e-05	0	0	0	0	0	0	0	0	0	0	0	0	0	0	0	0	0
msp_1200	unclassified	-4.28185e-05	0	0	-0.000200855	0	0	0	0.00137722	0	-0.000271761	-0.000287259	7.00136e-05	-0.00018512	0	-1.72584e-05	5.57149e-05	0	0	8.76414e-05	0	0	0	-0.000373131	0	0	-0.000275094	-0.000165205	0
msp_1201	unclassified Firmicutes	0	0	0	0	4.08237e-05	0	0	-9.96221e-05	0	0	2.31666e-05	-2.81798e-05	0.00016774	0	-3.91113e-05	3.01894e-05	0	-3.12803e-05	0	0	0	0	-7.11622e-05	5.52399e-05	0	0	-0.00014169	0
msp_1202	unclassified Blautia	0	0	0	0	0	0	0	0	0	0	0	2.54555e-05	0	0	0	0	0	0	0	0	0	0	0	0	0	0	0	0
msp_1203	unclassified Clostridiales	-3.19094e-05	5.55089e-05	0	0	0	0	0	-8.01082e-05	0	0	-9.81934e-05	0	0	0	0	0	0	0	0.000175693	0	0	0	0	0	0	0	0	0
msp_1204	Clostridium sp. CAG:914	0	0	0	0	0	0	0.000155188	0	-4.48585e-05	0	-3.52876e-05	0	0	0.000143114	0	0	0.000200459	-2.89255e-05	0	0	0	0	0	7.97368e-05	0	0	0	-0.000345185
msp_1205	Comamonas kerstersii	2.75707e-05	0	0	0	-4.35481e-05	0	0.000261697	0	-5.44602e-05	0	-3.20572e-05	-3.90268e-05	5.09739e-05	-0.000163124	-0.00282579	0	0	3.60677e-05	0	0	-0.00105694	0	0	-0.000206479	-0.000729997	5.33003e-05	0.000139908	0
msp_1206	unclassified Clostridiales	0	0	0	0	0	0	0	0	-1.26777e-05	0	1.39372e-05	-2.96492e-05	0	-1.68521e-05	0	0	5.90273e-05	0.000212052	0	0	0	0	0	-9.26306e-06	0	0	0	0
msp_1207	unclassified Bacteroides	0	0	0	0	0	0	0	0	0	0	2.93373e-05	0	0	0	0	0	0	0	0	0	0	0	0	0	0	0	0	0
msp_1208	unclassified Lactobacillus	0	0	0	0	0	0	0	0	0	0	0	0	0	0	0	0	0	0	0	0	0	0	0	4.8162e-05	0	0	0	0
msp_1209	unclassified Alistipes	0	1.99593e-05	0	0	0	0	0	0.000135781	0	0	0	0	0	0	0	-3.76931e-05	3.87114e-05	-5.26075e-05	0	0	0	0	0	0	0	0	0	0
msp_1210	unclassified Catabacter	0	0	0	0	0	0	0	0	0	0	0	0	-0.000105498	0	0	0	0	0	0	0	0	0	0	0	0	5.01208e-05	0	0
msp_1211	Clostridium sp. CAG:762	0	0	0	0	0	0	0	0	1.19381e-05	0	-0.000387357	-0.00026181	0	0	0	0	-7.60706e-05	0	0	0	0	0	0	0	0	0	0	0
msp_1212	unclassified	0	1.92843e-05	0	0	0	0	0	0	0	0	-3.49214e-05	0	0	0	0	0	0	0	0	0	0	0	-6.79493e-05	0	0	0	0	0
msp_1213	unclassified Clostridiales	9.01445e-05	0	0	0	0	0	0	-0.000248931	-2.49584e-05	0.000288742	-0.00142405	0.000112006	0	0	-1.37499e-05	0.000105574	0	5.82587e-05	0	0	0	0	-4.51262e-05	0	0	0	-0.000132523	0
msp_1214	Firmicutes bacterium CAG:884	0	0	0	0	0	0	0	4.54254e-05	0	0	-0.000546441	0	0	0	0	0	0	0	0	0	0	0	0	0	0	0	0	0
msp_1215	unclassified Porphyromonas	1.96396e-05	0	0	0	0.00019094	0	0	0	0	0.000253746	2.96176e-05	-6.65512e-05	0	0	5.0557e-05	0.00036489	0	4.29337e-05	0.000129886	0	0	0	0	1.55386e-05	0	0	0	0
msp_1216	unclassified Clostridiales	0	0	0	0	3.16172e-05	0	0	0	0	0	-3.04074e-05	0	0	0	0	0	0	0	0	0	0	0	0	0	0	0	0	0
msp_1217	Eggerthella sp. CAG:1427	0	0	0	0	-3.74281e-05	0	0	0	5.17495e-05	0	0	0	0.00010869	0	-0.000118336	0	0	-0.000108685	-3.46862e-05	0	0	0	0	2.33527e-05	0	0	-5.24062e-05	0
msp_1218	unclassified	0	0	0	0	0	0	0	0	0	0	-0.000278923	-2.47066e-05	0	0	0	0	0	0	0	0	0	0	0	1.78122e-05	0	0	0	0
msp_1219	Veillonella sp. oral taxon 158	0.000907783	0.000425385	-0.000800021	-0.00144314	-0.00035458	-0.00042819	-0.00285827	0.000258113	-0.000392762	-0.000150718	-0.00313156	-0.000808909	0.000169915	0.0102748	-0.00314664	0.000387027	0.000542644	-0.00188297	0.000943821	0.000308688	-0.000454088	0.0036875	-0.00121137	-0.00136049	0.000795894	0.00013088	-0.000341982	0.000348481
msp_1220	unclassified Lactobacillus	-2.26622e-05	0	0	0	0	0	0	8.75774e-05	7.38752e-05	0	0	-0.000158253	0	0.00119389	0.000120521	-2.86754e-05	0	0	0	0	0	0	0	6.08612e-05	0	0	-2.70495e-05	-0.000157778
msp_1221	Mycoplasma sp. CAG:776	0	0	0	0	0	0	0	0	0	0	-3.73125e-05	-4.44173e-05	0	0	0	5.1294e-05	0	0	-3.84509e-05	0	0	0	0	0	0	0	0	0
msp_1222	Lactobacillus vaginalis	-6.87314e-05	0	0	0	0	0	0	-0.00027554	3.4087e-05	0	0	-0.000133996	0	0	3.60816e-05	-0.000235056	-5.16594e-05	0	5.59455e-05	0.000160037	0	0	0	2.37941e-05	0	-3.15486e-05	-0.000141568	0
msp_1223c	Lactobacillus parabuchneri	0	0	0	0	0	0	0	0	0	0	0	-2.43008e-05	-4.20114e-05	0	1.40743e-05	0	0	0	0	0	0	0	0	0	0	0	0	0
msp_1225	unclassified	0	0	0	0	0	0	0	0	0	0	-2.67622e-05	0	0.000130786	0	0	0	-3.13405e-05	0	0	0	0	0	0	0	0	0	0	0
msp_1226	unclassified Clostridiales	0	0	0	0	0	0	0	0	0	0	-4.52425e-05	0	0	0	0	8.51304e-05	0	0	0	0	0	0	0	0	0	0	0	0
msp_1227c	Libanicoccus massiliensis	0	0	0	0	0	0	0	-0.000100924	0	-0.000130937	-1.96614e-05	3.40395e-05	3.41922e-05	0	0	0	0.000103307	0	0	0	0	0	0	0	0	-4.4998e-05	-0.000116186	0
msp_1228	unclassified Firmicutes	0	0	0	0	0	0	0	0	0	0	0	0	0	0	0	0	0	0	0.000102559	0	0	0	0	0	0	0	0	0
msp_1229	Bacteroides sp. Marseille-P3208T	-1.87435e-05	-1.70145e-05	0	0	0	0	0	0	0	0	0	-2.45933e-05	4.49852e-05	0	0	0	0	0	0	0	0	0	0	0	0	0	0	0
msp_1230	unclassified Clostridiales	0	0	0	0	-0.000227522	0	0	0	0	0	-0.000586358	9.10846e-05	-7.39737e-05	0	0	0	0	0	0	0	0	0	0	0	0	0	0	0
msp_1231	unclassified Firmicutes	0	0	0	0	0	0	0	0	0	0	-0.00108755	-0.000109535	0	0	-1.47231e-05	0	2.9934e-05	0	0	0	0	0	0	0	0	0	0	0
msp_1232	unclassified Firmicutes	0	0	0	0	0	0	0	0	0	0	0	-5.05066e-05	-3.57995e-05	0	0	0	0	0	0	0	0	0	0	0	0	0	0	0
msp_1233	unclassified Mycoplasma	0	0	0	0	0	0	0	0	0	0	-0.000136732	-3.26188e-05	0	0	0	0	0.000143781	0	0	0	0	0	0	0	0	0	0	0
msp_1234	Parvimonas micra	0.0128653	0.000276635	0	0	0.000813164	0.000177052	0	0	0.000596329	0.00510295	3.55639e-05	0.00365998	-0.000340431	-1.191e-05	5.14623e-05	0.00570971	0.00141836	0.00903488	0.00060413	0	0	0	0	0.000617987	0	0	0.00584783	0
msp_1235	unclassified Clostridiales	0	0	0.000291209	0	0	0	0	0.000489024	0	0	0	-2.75016e-05	-3.11407e-05	-1.75607e-05	-3.72622e-05	0.000127977	0.000159421	0	0	0	0	0	0	0	0	0	0	0
msp_1236	unclassified Lachnoclostridium	-0.000776395	-0.00167095	-0.000839451	-0.000518162	-0.00706377	-0.00200468	0.000313309	-0.000332698	-0.00197273	-0.000119726	-0.000660473	0.000127552	-0.00205608	-0.0034567	-0.00406745	-0.000143037	-0.000743153	-0.000694822	-0.000939807	-8.03284e-05	-0.00228574	-0.00177083	0.00058659	-0.0040561	0.000923209	-0.00119855	-0.00167783	0
msp_1237	Lactobacillus reuteri	0	0	-0.000451553	0	0.00023668	0	0	0	7.73774e-06	0.000114604	0	-6.95373e-05	0.000196563	1.6571e-05	3.1013e-05	-5.32767e-05	0	5.49263e-05	0	0	0	0	0	0	0	0	0.000148999	0
msp_1238	unclassified Oscillibacter	-0.000289282	0.000137961	0.00027288	0	-0.000645639	0	0	0.000485878	-0.000186393	0.000717506	-0.000849547	0.00108008	0.000536178	-1.78282e-05	-1.5696e-05	0.00189234	0.00245838	-0.000307776	-0.000111219	0	-0.000173622	0	7.32894e-05	0.000130953	-0.000173799	-0.000283212	0.000522044	0.000212381
msp_1239	unclassified Clostridiales	0	6.47784e-05	0	0	0	0	0	0	0	0	-8.31809e-05	0	0.000103363	0	0	0	4.91096e-05	2.57612e-05	0	0	0	0	0	0	0	0	-0.000181869	0
msp_1240	unclassified Holdemanella	0	0	0	0	0	0	-7.15436e-05	-0.000110746	-5.44716e-05	-2.00676e-05	-0.000237169	6.86596e-05	-7.80632e-05	0	-2.47415e-05	0.000161063	0.000125274	0	0	0	0	0	0	0	0	0	0	0
msp_1241	Alistipes sp. Zagget8	0	0	-0.000127377	0	-0.000433596	-0.000192739	-8.87665e-05	0	-0.000212116	0	-6.8364e-05	0	0	-4.50841e-05	3.48298e-05	0	0	8.94412e-05	0	0	0.000152816	0	-5.89319e-05	-0.000113787	0	9.83873e-05	0	0
msp_1242	unclassified Bacteroidales	3.72657e-05	0	0	0	0	0	0	0	0	0	0	0	0	0	0	0	0	0	0	0	0	0	0	0	0	0	0	0
msp_1243	Clostridium sp. CAG:710	0	0	0	0	0	0	0	0	0	0	-5.54356e-05	-9.32622e-05	5.22002e-05	-2.43373e-05	0	0	3.6604e-05	0	0	0	0	0	0	4.8259e-05	0	0	3.91905e-05	0
msp_1244	Collinsella aerofaciens	0.00274913	-0.00113166	0.00358177	-0.000482906	0.000659415	-0.000390315	0.00201648	-0.00119822	0.00119762	0.00212052	0.00191466	0.000699042	0.00173496	0.000407304	-0.00244106	-0.000795059	0.00175972	0.00256753	-0.000985168	-0.00161896	-0.00044989	0.00075	0.00194317	0.00138716	0.0076974	-0.000979888	-0.000620197	0.0157463
msp_1245	Parvimonas sp. KA00067	1.29907e-05	0	0.000128228	0	0.000477362	5.11749e-05	0	0	0	0	0	0	0	0	-6.75115e-05	0.000374697	0	3.29517e-05	0	0	0	0	0	-9.23663e-06	0	0	6.32635e-05	0
msp_1246	unclassified	0	0	0	0	0	0	0	0	0	0	2.60367e-05	0	0	0	0	0	3.17966e-05	0	0	0	0	0	8.2276e-05	0	0	0	0	0
msp_1247	unclassified	0	0	0.000436339	0	0	0	-0.000135528	-0.000286188	0	0	3.6357e-05	-3.10569e-05	0.000455409	0	3.85192e-05	0	0.000140113	0	0	0	0	0	0	4.1708e-05	0	0	0	0
msp_1248	unclassified	0	0	0	0	3.74898e-05	0	0	0.000198724	0	-0.000128719	0.000204351	-0.000130177	-0.000104624	0	0	-8.29481e-05	-5.93118e-05	0	0	0	0	0	0	0	0	0	-3.39303e-05	-0.00016154
msp_1249	unclassified Prevotella	0	0	0	0	0	0	0	0	0	0	0	0	0	0	0	0	0	0	0	0	0	0	0	0	0	0	-3.22027e-05	0
msp_1250	Drancourtella sp. An12	9.45185e-05	2.35803e-05	9.52259e-05	0	-0.000248132	0	0	-0.000153388	0	0	2.77844e-05	0	0	0	0	0.000163948	0	-5.2069e-05	0	0	0	0	0	1.0934e-05	0	0.000196163	-5.02137e-05	0
msp_1251	unclassified Oscillibacter	-2.65436e-05	6.19007e-05	0	0	0	2.69557e-05	0	0.00056018	-7.94699e-05	0.000323706	0	7.98807e-05	0.000125739	0	-7.98108e-05	0	0	0	0	0	0	0	0	0.000135518	0	-8.17599e-05	-0.000149957	0
msp_1252	unclassified Clostridiales	0	0	0	0	3.97684e-05	0	0.000660362	0	6.94467e-05	0	-0.000291201	0	0	0	3.50411e-05	0	0	0	4.93047e-05	0	0	0	0	-3.24043e-05	0	0	5.03289e-05	0
msp_1253	unclassified Clostridiales	1.12738e-05	0	0	0	0	0	0.000266569	0	2.42925e-05	0	-4.03767e-05	-5.15974e-05	0	0	-0.000890216	4.40177e-05	-4.61496e-05	0	-0.000127941	0	0	0	0	2.20724e-05	0	0	3.12844e-05	0
msp_1254	unclassified	0	0.000255915	0	0	0	0	0	0	0	0	4.04933e-05	3.1663e-05	0	0	0	0	0	0	0	0	0	0	-6.17852e-05	0	0	0	3.56227e-05	0
msp_1255	unclassified Faecalibacterium	4.44602e-05	0	0	0	0	0	0	0	4.03688e-05	0	0	0	0	4.89879e-05	4.00897e-05	0	0	-2.41595e-05	0	0	-0.000960496	0	0	6.12198e-05	0	0	0	0
msp_1256	unclassified Clostridiales	-0.000209135	7.34923e-05	0	0	-0.00011706	0	0.000279611	-6.09136e-05	-2.68123e-05	0.000134235	0.000306153	-0.000194052	0.00028457	-7.17525e-05	-0.00114102	0.00026129	0.000344115	-0.000223859	0.000152185	0	5.51978e-05	0	0	-0.000164546	-0.000342272	0.000195037	0.000146275	0
msp_1257	Clostridium sp. CAG:921	0	0	0	0	-2.85495e-05	0	0	6.33025e-05	9.09845e-06	0	-4.00207e-05	0	0	0	-3.2974e-05	0	0	0	0	0	0	0	0	0	0	0	0	0
msp_1258	unclassified	0	0	0	0	0	0	0	0	0	0	0	0	6.08963e-05	0	0	0	3.25181e-05	0	0	0	0	0	0	0	0	0	0	0
msp_1259c	Clostridiales bacterium S5-A14a	1.08156e-05	0	0	0	0	0	0	0	1.35761e-05	0	0	0.000161615	0	0	2.71826e-05	0	0	0	0	0	0	0	0	2.73126e-05	0	0	0	0
msp_1260	Clostridium sp. CAG:793	0	0	0	0	0	0	0.0002257	0	0	0	-0.000139954	0	0	0	-6.17702e-05	-2.96775e-05	-4.01586e-05	0	0	0	0	0	0	0	0	0	0	0
msp_1261	unclassified Clostridiales	-1.18549e-05	0	0.000151342	0	0	0	0	0	0	0	-7.11066e-05	0.000276647	7.62594e-05	0	-1.56485e-05	9.68001e-05	0	0	0	0	0	-0.000947917	0	0	0	0	0	0
msp_1262	unclassified Clostridiales	0	0	0	0	4.24647e-05	0	0	0	0	0	-3.79953e-05	-3.60613e-05	0	0	0	0	0	0	0	0	0	0	0	0	0	0	0	0
msp_1263c	Prevotella sp. UBA641	0	0	0	0	0	0	0	0	0	0	0	5.9456e-05	0	0	0	0	0	0	0	0	0	0	0	0	0	0	0	0
msp_1264c	Dielma fastidiosa	0.000211462	0.000648292	0	0	-0.000378653	-0.000182413	0.000214087	0.000101062	0.000333829	7.63266e-05	-0.000178867	-0.00020367	0.000153149	-0.000206694	0.000103732	0.000330025	-0.000113516	-0.000332369	0.000191654	7.7555e-05	-0.000298699	0	-0.000420459	0.000653813	7.45494e-05	4.86644e-05	0.000211199	0
msp_1265	Lactobacillus johnsonii	3.12724e-05	0	-0.000339421	-0.000419872	-3.91842e-05	-4.32624e-05	0	0	3.37996e-05	0	0	2.59317e-05	4.70007e-05	-6.46403e-05	0	6.95106e-05	-3.5026e-05	0	0	0	0	0	0	0.000127285	0	0	0	0
msp_1266	Acidiphilium sp. CAG:727	0	0	0	0	3.64727e-05	0	0	0	0	0	0.000122469	0	8.20671e-05	0	0	0	0	0	0	0	0	0	0	3.88783e-05	0	0	0	0
msp_1267	unclassified Eubacterium	0	0	0	0	0	0	0	0	0	0	0	-0.000235602	0	0	-1.39082e-05	0	0	0	-7.92642e-05	-8.55168e-05	0	0	0	0	0	0	0	0
msp_1268	Lactobacillus acidophilus	7.25451e-05	0	0	0	0	0	0	0	0	0	-5.64682e-05	7.56521e-05	-3.80154e-05	0	1.45951e-05	0	5.5176e-05	0	2.38747e-05	-6.55806e-05	0	0	3.31901e-05	-3.45931e-05	0	0	0	0
msp_1269	unclassified Clostridiales	0	0.000148929	0	0	-0.00012729	0	0.000138208	0	1.07148e-05	0	-0.00189417	-7.01744e-05	0	-1.43637e-05	0	0	0.000287882	0	0	0	0	0	0	1.32732e-05	0	0.000185658	-0.000103094	0
msp_1270	unclassified Lachnospiraceae	4.92673e-05	0.0002358	-0.000588595	0	0.000563757	0	8.74036e-05	0	-8.39512e-05	-0.00113406	0.000161647	-0.00219337	-0.000807784	7.37683e-05	-0.000626355	-0.000118707	0.00028504	0	0.000658881	0	6.03179e-05	0	-0.000481073	-0.00037513	0.000151419	0.00019363	0.000233829	-0.00106455
msp_1271	unclassified Clostridiales	0	0	0.000142686	0	0	0	0.000212044	0	-1.12599e-05	0	-4.97037e-05	-0.000308863	0	0	6.19112e-05	0	0	0	0	0	0	0	0	0	0	0	0	-0.000123145
msp_1272	unclassified Bacteroidales	0	0	0	0	0	0	-6.57407e-05	0	0	0	0	0	0	4.63598e-05	1.49245e-05	0	0	-6.08608e-05	0	0	-0.000348121	0	0	-1.24897e-05	0	0	0	0
msp_1273	unclassified Bacteroidales	0	0	0	0	-4.27145e-05	0	0	0	0	0	5.79315e-05	0	0	0	0	0	0	0	0	0	0	0	0	0	-4.20985e-05	0	0	0
msp_1274	unclassified	0	0	0	0	3.39977e-05	0	0	-0.000177334	0	0	-0.000259361	0	0	0	2.46818e-05	0	0	0	0	0	0	0	0	0	0	0	0	0
msp_1275	Clostridium sp. CAG:594	0	0	0	0	3.53298e-05	0	0.000271717	0	1.14451e-05	0	-0.000274969	0	0.000362014	-0.000126981	-0.000139232	0	0	0	7.12963e-05	0	0	0	-4.81865e-05	0.000147089	-9.49752e-05	0	-5.64756e-05	0
msp_1276	Succinatimonas hippei	0.00108945	0.00081654	0	0	0	9.46885e-05	0	0	-0.000252391	0	0	-4.40063e-05	3.69962e-05	1.84481e-05	0	0	0	-3.36458e-05	0	0	0	0	0	-1.28645e-05	-2.69355e-05	0	0	0
msp_1277	unclassified Acidaminococcus	0	0	0	0	0	-8.97558e-05	0.000153035	0	0	0	0	0	0	0	0	0	0	0	0	0	0	0	0	4.14435e-05	0	0	-3.49688e-05	0
msp_1278	unclassified Bacteroidaceae	0	0	0	0	0	0	0	0	0	0	0	0	0	6.35936e-05	0	0	0	0	0	0	0	0	0	0	0	0	0	0
msp_1279	unclassified Clostridiales	0.00114721	-0.000673997	-0.00228495	-0.00113283	-0.00163371	-0.0012463	0.000655295	0.00126532	-0.000835228	0.00168	-0.000438892	0.000382616	-0.00116318	-0.000878129	0.00230923	0.000385815	-0.00240317	-0.000512541	0.000245042	8.13481e-05	0.000264569	-0.001375	0.000446661	0.00209792	0.000503797	-0.00156111	0.000508144	0.000345185
msp_1280	unclassified Elusimicrobium	0	0	0	0	0	0	0	0	0	0	0	-2.39204e-05	0	0	0	0	0	0	0	0	0	0	0	0	0	0	0	0
msp_1281	unclassified Elusimicrobium	0	0	0	0	0	0	0	0	0	0	0	0	0	0	0	0	0	0	0	0	0	0	-9.22163e-05	9.04714e-06	0	0	-4.84742e-05	0
msp_1282	unclassified Clostridiales	0.000128032	0.00051709	0	0	-0.000564275	0	0	6.17001e-05	-0.000138278	0	-3.95773e-05	0	0.000147276	0	1.55613e-05	0	-3.32496e-05	-0.000113538	0	0	0	0	0.000832628	-8.89823e-06	0	-0.000177888	-0.000210667	0
msp_1283	unclassified Clostridiales	0	0	0	0	-6.31107e-05	0	0.000166846	0	-1.18453e-05	0	-3.41023e-05	0	0	0	-2.12755e-05	0	0	0	-8.04029e-05	0	0	0	-5.96325e-05	1.23527e-05	0	0	0	0.00034188
msp_1284	unclassified Bacteroides	-1.41102e-05	0	0	0	0	0	0	0	8.51451e-05	0	0	0	0	3.49194e-05	0	0	0	-6.42217e-05	0	0	0	0	-3.59241e-05	0.000105574	-9.81082e-05	0	0	0
msp_1285	unclassified Firmicutes	0	0	0	0	0	0	0.000501563	0	-2.39527e-05	0	3.41418e-05	-6.5324e-05	-3.1085e-05	0	0	0	0.000232724	-6.80791e-05	0	0	0	0	-5.31383e-05	-2.09158e-05	0	0	0	0
msp_1286	Acidaminococcus sp. CAG:917	-1.12775e-05	0	0	0	0	0	0	0	0	5.75089e-05	-0.000102038	0	0	0	0	0	0	0	-4.24084e-05	0	0	0	0	0	0	0	0	0
msp_1287	Lactobacillus delbrueckii	0.000156873	0	0	0	-0.000352624	-0.000213772	0.000145484	-9.5621e-05	0.000118638	-7.19562e-05	1.12996e-05	-0.000536219	-0.000981642	1.44457e-05	1.49314e-05	0.00047262	-0.0010333	-0.000106319	-0.00098783	0.000299391	0	-0.000854167	6.67632e-05	0.000354741	0	-0.000206999	3.30473e-05	0
msp_1288	unclassified Clostridiales	0	0	0	0	0	0	0	0	0	0	-8.12521e-05	0	4.73842e-05	0	0	0	0	0	0	0	0	0	0	0	0	0	0	0.000159471
msp_1290	unclassified Firmicutes	0	0	0	0	-0.000135409	0	0	0.000100223	0	0	-0.000481467	4.51604e-05	0	0	0.000340072	-0.000172853	0	3.78573e-05	0	0	0	0	-7.83939e-05	-3.02514e-05	0	0	0	0
msp_1291	unclassified Clostridiales	0.00214969	0.000308241	-0.0022825	-0.000655983	0.000367235	-0.000469927	0.000579462	-0.000328379	0.000581147	-0.000308838	0.000694686	-0.00474288	-0.00244588	-0.000985577	0.0011182	0.00125426	0.00194976	0.000799893	0.00202504	0.000465558	0.000661982	-0.000870833	-0.000184738	0.00086734	0.000461004	-0.00177401	0.000631003	0.0038743
msp_1292	unclassified	1.63137e-05	2.29495e-05	0	0	-3.92536e-05	0	0	0.000311636	-9.23237e-05	-8.92784e-05	-3.85394e-05	-0.000621037	-0.000128499	0	8.57184e-05	0.000138776	0	0.000104014	3.99052e-05	0	0	0	0	0	0	0	0	0
msp_1293	Clostridiales bacterium UBA643	-0.000212774	0.000431464	-0.000337331	0	0.00155821	0	0	-0.00176063	-0.000111662	0.000210581	0.000311866	-0.000164705	-0.000127438	7.32361e-05	3.87331e-05	0.00171314	0.000333303	0.000206847	-6.89481e-05	0	0	0	0	-3.26938e-05	0	0	0.000207228	0
msp_1294	unclassified Veillonella	-3.18046e-05	0	0	0	0	0	0	0	0	0	0	0	0	0	0	0	0	0	0	0	0	0	0	1.99305e-05	0	0	0	0
msp_1295	unclassified	-2.36978e-05	0	0	0	-5.71971e-05	0	0	0	0	-0.000162601	0	2.42545e-05	0	0	1.51628e-05	0	0	0	0	0	0	0	0.000158031	0	0	0	4.93655e-05	0
msp_1296c	unclassified Firmicutes	-4.10817e-05	0.000698249	0	0	0	0	0	0.000484685	0	0	2.42899e-05	-0.000139315	-3.23858e-05	0	-1.47342e-05	-9.78215e-05	-9.33063e-05	-2.85667e-05	0	0	0	0	-7.32553e-05	0	0	9.81775e-05	0.000194975	-0.000365111
msp_1297	unclassified Firmicutes	-2.21639e-05	1.78021e-05	0	0	0	0	0	0	0	0	-0.000170252	-2.97406e-05	0	0	0	-7.23383e-05	0	0	-0.000117272	0	0	0	0	0	0	0	0	0
msp_1298	unclassified Firmicutes	0	0	0	0	0	0	0	0	0	0	-9.65529e-06	0	0	0	0	0	0	0	0	0	0	0	0	-4.49841e-05	0	0	0	0
msp_1299	unclassified Firmicutes	1.59676e-05	0	0.000214042	0	0	-0.000191071	0	0	0	0	-4.75933e-05	5.49688e-05	5.50253e-05	0	0	0.000561353	3.76171e-05	2.45985e-05	-4.7294e-05	0	0	0	-0.000112428	0	0	0	0	0
msp_1300c	Christensenella minuta	0.000178885	0.000413657	0	0	0.000490735	-8.15699e-05	-0.000355299	-0.000199605	0.000516542	0	-0.00011124	-0.000440979	-0.000123347	-9.25282e-05	-0.000297207	0.000130674	-0.000329856	0.000241533	0	0	-0.000118238	0	0	0.000451785	0	-0.000118604	9.51833e-05	0.000423272
msp_1301	unclassified Firmicutes	0	0	0	0	0	0	0	0	0	0	1.93579e-05	0	-0.000184847	0	0	0	0	0	0	0	0	0	0	0	0	0	0	0
msp_1302	unclassified Firmicutes	0.000503695	-0.000111667	0.00055671	0	-0.00056258	-6.3138e-05	0.000162318	-0.00061823	-0.00020698	-0.000278245	0.000563979	-0.00124931	-0.00111966	-0.000709001	-0.000342674	-0.00153558	-0.00317838	0.000201235	0.000275279	-0.000142458	7.67284e-05	0	-0.0013326	-0.000817673	0.000323856	-0.000394545	0.0026539	0.000873954
msp_1303	unclassified Clostridiales	0	0	0	0	0	0	0	0	0	0	-7.10252e-05	0	0	0	0	0.000125754	0	0	0	0	0	0	0	0	0	0	0	0
msp_1304	unclassified Firmicutes	0	0.000328006	0	0	0	0	0	0	0	0	0	0	0	0	0	0	0	0	-0.000195825	0	0	0	0	0	0	0	0	0
msp_1305	unclassified Clostridiales	-1.05438e-05	5.74518e-05	0	0	0	0	0	0.000529841	0	0	-0.000210441	3.41176e-05	0.000106038	0	0	0.000127196	0.000156342	0	0.000108052	0	0	0	0.000105651	9.50027e-06	5.1835e-05	-0.000322031	-0.000126083	0
msp_1306c	unclassified Firmicutes	0	0	0	0	0	0	0	0	0	0	0	0	0	0	0	0	0	0	0	0	0	0	0	0	0	0	0	0
msp_1307	unclassified Firmicutes	0	0	0	0	0	0	0	0	0	0	-0.00148659	-0.000157152	0.000136585	0	0	0.000120706	3.47435e-05	0	0	0	0	0	0	2.46291e-05	0	0	0.00017923	0
msp_1308	Turicibacter sanguinis 2	-0.00083055	0.000201797	-0.000373494	0	-0.000361486	-0.000593008	0.00062506	-0.000338158	-0.000302729	0.000944265	-0.0013991	-0.00126194	-0.000419605	-0.000300233	0.00076477	-0.000323071	-0.00291687	-0.00126147	0.00236604	0	7.57488e-05	0.00192222	-0.000589012	0.00041638	0	-0.000962901	-0.000379915	-0.000317778
msp_1309	unclassified	0.000141965	7.64204e-05	0	0	-0.000102227	0	0	9.29442e-05	0	0.00117861	-0.000118167	3.60014e-05	0	0	0	-0.00017806	0	3.63554e-05	-4.35657e-05	0	0	0	0	0	0	0	0	0.00015763
msp_1310	unclassified Flavonifractor	0	0	0	0.000743201	0	0	0	0	-4.64149e-05	0	-4.43349e-05	-1.79094e-05	3.74653e-05	0	0	0	0	0	0	0	0	0	0	7.6432e-06	0	0	0	0
msp_1311	Methanosphaera stadtmanae	-3.76428e-05	0.000371922	0	0	-0.000262686	0	0	0	1.7015e-05	0	-3.51939e-05	-7.85296e-05	0	0	-9.75085e-05	7.19076e-05	6.22372e-05	3.00966e-05	0	0	0	0	0	-0.000101293	0	0	0	0
msp_1312	unclassified Oscillibacter	0.000341748	9.93568e-05	0.000990722	0	-0.000920422	-5.46493e-05	0.000116843	0	-0.000615467	-0.00043312	-0.000157063	0.000218871	0.00271553	0.000162975	2.86226e-05	5.55802e-05	0.000584436	-0.000100845	0.00022189	0	-0.000130871	0	-0.000965136	0.000263668	-0.000386508	0.000639432	-0.000323212	-0.000766328
msp_1313	Acholeplasma sp. CAG:878	0	0	0	0	-3.75272e-05	0	0	0	0	5.18366e-05	-0.000216024	0	0	0	0	0	0	0	0	0	0	0	0	-7.15577e-06	0	0.000196564	0	0
msp_1314	unclassified Catabacter	0	0	0	0	-4.15434e-05	0	0	0	0	0	0	0	0	0	0	0	0	0	0	0	0	0	0	0	0	0	0	0
msp_1315	unclassified Firmicutes	-1.31057e-05	0.000124355	-0.000225987	0	-0.00193743	0	0	0.00531651	0	8.71933e-05	-0.000385964	-7.74688e-05	-0.00106021	-1.40816e-05	-0.000201631	0.000544579	-0.000356496	-9.37174e-05	0.000190236	0	0	-0.000429167	0.00035479	-1.22671e-05	0	0	0.00047396	0
msp_1316	unclassified	0	0	0	0	0	0	0	0	0	0	0	0	0	0	0	0	0	0	0	0	0	0	0	0	0	0	0	0
msp_1317	unclassified	0	0	0	0	0	0	0	0	0	0	0	0	0	0	0	0	0	0	0	0	0	0	0	0	0	0	0	0
msp_1318	unclassified Euryarchaeota	0	0	0	0	-0.000160225	0	0	0	0	0	0	-5.49245e-05	0.000131714	0	0	0	0	0	0	0	0	0	0	0	0	0	0	0
msp_1319	unclassified Clostridiales	0	0	0	0	0	0	0	0	0	0	-9.71576e-05	0	0	0	0	0	0	0	0	0	0	0	0	0	0	0	0	0
msp_1320c	unclassified	0	0	0	0	0	0	0	0	0	0.00133013	-2.92176e-05	0	0	0	0	0	0	0	0	0	0	0	0	0	0	0	0	0
msp_1321c	unclassified	0	0	0	0	0	0	0	0	0	0	0	0	0	0	0	0	0	0	0	0	0	0	0	0	0	0	0	0
msp_1322	Clostridium sp. CAG:1193	0	0	0	0	0	0	0	0	0	0	-0.000114879	-3.91948e-05	0	0	-4.01749e-05	3.45479e-05	0	0	0	0	0	0	0	0	0	0	0	0
msp_1323	unclassified Flavonifractor	0.000711368	-0.00105473	-0.00110231	-0.000630864	-0.00212599	-0.000397278	0.00161144	-0.00136707	0.000371124	-0.000820462	0.000661239	0.00104175	0.00090296	-0.000604708	0.00375366	0.000925415	0.000691481	-0.000471345	0.000791903	0	-0.000322066	0	-0.00608537	-0.000708927	0.00229087	-0.000746785	-0.00338938	0.00137189
msp_1324	unclassified Clostridiales	0	0	0	0	0	0	0	0	0	0	6.27904e-05	-2.44359e-05	0	0	0	0	0	0	0	0	0	0	0	0	0	0	0	0
msp_1325	Megasphaera micronuciformis	0.000809236	-0.000220947	9.25641e-05	0	0.000336163	0.00125179	0.000539696	-0.000207739	0.00127092	0	-5.54088e-05	3.63517e-05	0.000900976	0.017149	0.000221708	0.00078293	0.000852341	0.00024726	-0.000604614	0	-7.11155e-05	0	0	0.00149527	-9.09075e-05	0.000519334	0.000271179	0
msp_1326	unclassified Mitsuokella	0	0	0	0	0	0	0	0	0	0	-2.06954e-05	0	0	0	0	0	0	0	0	0	0	0	0	-2.36078e-05	0	0	0	0
msp_1327	Peptostreptococcus stomatis	0.0150081	-2.7341e-05	0	0	0.000490463	0.000169718	0	9.98386e-05	6.99518e-05	0.00378958	0	0.00513115	-3.43036e-05	6.17291e-05	-9.67197e-05	0.00236955	0.000109289	0.00588366	0	0	0	0	0	0.000301658	0	0	0.0036417	0
msp_1328	unclassified Clostridiales	0	0	0	0	0	0	0	-6.97949e-05	0	0	7.13395e-05	-0.000337098	0	-1.71649e-05	-0.000102997	-0.00010655	0	0	5.68015e-05	0	0	0	-0.000185268	-9.3338e-06	7.3073e-05	-9.85504e-05	0	0.000335463
msp_1329	Veillonella tobetsuensis	0.000218248	-0.000203382	0	0	4.81883e-05	0.000452322	0	0.000168855	0.000268189	0	0	-8.31721e-05	0.000118197	0.00337952	-0.0031053	0	4.74952e-05	-0.000167895	-0.000754935	-0.000106516	0	0	0	-0.000653632	0.000700808	0	0	0
msp_1330	unclassified	0	0	0	0	0	0	0	0	0	0	0	0	0	0	0	0	0	0	0	0	0	0	0	0	0	0	0	0
msp_1331	Hafnia paralvei	7.78466e-06	0	0	0	-7.21464e-05	0	0	0	1.02036e-05	-0.000100851	0	-0.000107964	0.000362208	0	3.72896e-05	0	0	0	0.000164389	0	0	0	-3.65138e-05	-9.30054e-06	0	-0.000176419	-0.000886192	0
msp_1332	unclassified Clostridiales	-9.7899e-06	0	0	0	0	0	0	0	0	0	-3.77126e-05	0	0	0	0	-3.39829e-05	3.24043e-05	0	0	0	0	0	0	0	0	-0.000268966	-5.00479e-05	0
msp_1333	Clostridium sp. CAG:1000	0	0	0	0	0	0	0	0	0	0	-6.59306e-05	0	0	0	0	0	0	0	0	0	0	0	0	0	0	0	0	0.000145333
msp_1334	unclassified	0	0	0	0	0	0	0	0	0	0	-2.24561e-05	0	0	0	0	0	0	0	0	0	0	0	0	0	0	0	5.19163e-05	0
msp_1335	Anaeromassilibacillus sp. An172	0	4.97333e-05	0	0	0	0	0	0	0	0	0	0	0	0	0	0	-2.91079e-05	0	0	0	0	0	0	0	0	0	0	0
msp_1336	Anaerococcus obesiensis == vaginalis	0.000242985	-1.35896e-05	0	0	0.00207095	7.94789e-05	0	9.89621e-05	-8.75037e-05	0	2.06424e-05	0.000520554	0.000449786	0	-6.29143e-05	0.00206775	-0.000104256	0.000124869	0	0	0	0	0	0.000257888	0	0	0	0
msp_1337c	Clostridium sp. Marseille-P2538	0	0	0	0	0	2.95746e-05	0	0	0	0	0	0	0	0	0	7.32238e-05	0	0	0	0	0	0	-9.96771e-05	9.44352e-06	0	0	-3.47193e-05	0
msp_1338	unclassified Clostridiales	0	0	0	0	0	0	0	-0.000112846	0	0	1.55545e-05	0	0	0	0	0	0	0	0	0	0	0	0	0	0	0	0	0
msp_1339	Gordonibacter urolithinfaciens	0.00225464	-0.000434713	-0.000193601	0	-0.000770585	-0.00223204	0.000465264	0.00324195	0.00181047	-0.000268803	0.000126649	-0.00122347	-0.000499875	-0.000263839	0.00195352	-0.00163128	-0.000800206	-0.000565297	-0.000682146	0.00240866	0	0.000827083	-0.00282153	0.00336207	0.000276041	-0.00261228	-0.00150076	0
msp_1340	unclassified Butyricimonas	0.000155739	0	0	0	0	-0.000189403	0.00154609	0	0.000246039	0	-3.33709e-05	0	0	-0.000232847	5.21336e-05	0	0	0.000134021	0	0	0	0	5.30676e-05	-8.24719e-05	0.000143919	0	-0.000173942	-0.000177845
msp_1341	Streptococcus infantarius	0	0	0	0	0	4.94015e-05	9.16956e-05	0	0.000283145	0	0	0	0	0.0017497	9.50261e-05	0	0	9.46798e-05	0	0	0	0	0	-0.000161123	-4.15012e-05	0	0	0
msp_1342	unclassified Firmicutes	0.000577396	-5.88294e-05	-0.000110509	0	-0.000188145	0.000131562	-9.78595e-05	0.000299351	-0.00049072	-0.000156374	0.000923318	-0.000268347	0.000349265	-0.000966802	0.000438943	0.000126546	-7.4678e-05	-0.000479232	-0.000224097	0	-0.000279607	0	-3.85287e-05	-0.000119421	0.000148238	0.000463221	-0.000398774	-0.00107473
msp_1343	unclassified Clostridiales	0	0	0	0	-0.000227406	0	-0.000203472	0	7.17282e-05	-0.000121229	-0.00520857	-7.83021e-05	-7.13538e-05	-7.31261e-05	-0.000977317	-0.000159011	4.95872e-05	-6.54842e-05	4.2065e-05	0	0	0	0	-2.62706e-05	0	0	0	0.000151481
msp_1344c	Bacteroides acidifaciens	0	0	0	0	0	0	0	0	0	0	0	0	0	0	0	0	0	2.54143e-05	0	0	9.72476e-05	0	0	2.21896e-05	0.000249204	0	0	0
msp_1345c	unclassified	0	0	0	0	-0.000250844	0	0	0	0	9.51896e-05	0	0	0	0	0	0	0	0	0	0	0	0	0	0	0	0	0	0
msp_1346c	unclassified Bacteroides	0	0	0	0	0	0	0	0	0	0	0	0	0	0	0	8.53063e-05	0	0	0	0	0	0	0	0	0	0	0	0
msp_1347c	unclassified	-4.23201e-05	0.000229793	-0.000129792	-0.000986111	-0.000213551	-3.73504e-05	5.97164e-05	8.71739e-05	0.000261076	0.000144504	-0.00163467	-0.00053593	-0.000270092	-0.000181089	-0.00224867	2.6351e-05	-0.000934496	-0.000476384	0.0057052	0	0.000331408	0	-0.000237863	-0.00025584	-4.76995e-05	0.000151358	0.000379351	0.00270977
msp_1348	unclassified Clostridiales	0	-1.72345e-05	0	0	0	0	0	0	0	0	0	0	4.72145e-05	0	0	5.20758e-05	0	0	0	0	0	0	0	0	0	0	0	0
msp_1349	unclassified Clostridiales	-0.000855131	-0.0004653	0	-0.00057265	-0.000658517	0.000272754	-0.000756216	-0.000605249	-0.00351562	0.000268401	0.000712145	-0.000677271	-0.000550984	-0.00139221	0.000894519	0.000686506	0.00035414	-0.000782183	-0.00108546	0.000635549	0.000596764	0	-0.00105624	-0.00097298	0.000330372	0.00283032	0.001145	-0.000747556
msp_1350	unclassified Prevotella	0	0	0	0	0	0	0	0	0	0	0	3.34279e-05	0	0	0	0	0	0	0	0	0	0	0	-4.6197e-05	0	0	0	0
msp_1351	Clostridium celatum	-0.000150516	-4.80135e-05	0	0	-0.000109505	0	0.000186928	0	-0.0002861	0	1.42614e-05	-0.000525612	-0.000548796	0.000179616	0.000168208	0.000403001	0.000349007	7.06045e-05	0	0	0	0	-5.84053e-05	-5.61166e-05	0	0	-6.94458e-05	0
msp_1352	Enterobacter cloacae	-3.50805e-05	0.000300084	0	0	-3.38533e-05	7.63175e-05	-0.000105298	0	4.84179e-05	0	-3.6384e-05	0	0	4.19441e-05	0.000165874	0	0	-1.73535e-05	0	0	-0.000603478	0	0	-0.000491348	-0.000343562	0	0.000101883	0
msp_1353	unclassified Clostridium	-2.91801e-05	-6.57947e-05	0	0	-0.000845346	-6.1976e-05	0	0.00184851	-0.000132016	-7.93644e-05	-0.000515556	-0.000167018	-0.000208377	0	0.000255855	0.000367385	0.00020267	0.000218331	-0.000202233	0	0	0	-0.000175391	0.000385206	-4.15801e-05	-7.8284e-05	0.000769966	0.000272593
msp_1354	unclassified Firmicutes	0	0	0	0	0	0	0	0	0	0	-1.4012e-05	0	0	0	0	0	0	0	0	0	0	0	0	0	0	0	0	0
msp_1355	unclassified Clostridiales	0	0	0	0	0	0	0	6.81828e-05	0	0	-0.000115847	0	-0.000129985	0	0	0	0	0	-0.000256572	0	0	0	0	0	0	0	0	0
msp_1356	Anaeromassilibacillus sp. An250	-0.00036248	0.000966942	-0.00137568	-0.00150085	-0.00016019	-0.00135993	-0.000530392	0.000872421	-0.000377254	-0.000528794	-0.00152964	0.000974931	0.0011965	-2.4821e-05	0.00200904	-0.000231095	-0.000749158	-0.00032663	-0.00137495	0	2.36685e-05	-0.00542708	0.000449749	-0.000171941	0.000408602	0.000557494	-0.00291868	0.00124575
msp_1357	unclassified Firmicutes	0	6.10877e-05	0	0	4.97193e-05	0	0	-9.61336e-05	-0.000103926	0.0008208	-5.86155e-05	0.000107503	0.000121092	2.70251e-05	0	7.30758e-05	8.31086e-05	-3.87201e-05	0	0	0	0	8.46646e-05	6.20873e-05	0	-0.00012777	0	0
msp_1358	unclassified Clostridiales	-8.21883e-05	-6.06322e-05	0	0	0.000155577	0	0	-8.41617e-05	-4.31971e-05	-0.000152987	-0.000963898	0	7.35131e-05	0	-0.00028457	0.000407106	4.2232e-05	0	-8.8005e-05	0	-0.00296171	0.00136458	0.00079909	-6.513e-05	0.000150487	6.48129e-05	0.000160912	0
msp_1359	unclassified Clostridiales	0	0	0	0	0	0	0	0	0	0	0	0	0	0	0	0	0	0	0	0	0	0	0	0	0	0	0	0
msp_1360	unclassified Coprobacter	-0.000877787	-8.03754e-05	-0.000111146	0	0.000129619	0	0	0.000219505	-3.88148e-05	0.000130872	0.000319784	8.53746e-05	3.79608e-05	-0.000122468	6.77242e-05	0	0	-0.000123033	0.000120617	0.000648423	0	0	5.27232e-05	-8.3856e-05	-0.000171303	0	0	0
msp_1361	unclassified Porphyromonas	6.48486e-05	0	0	0	0.000828559	0	0	0	-3.85291e-05	0.00096005	0	0.000817814	0	-3.8474e-05	0.000249979	0.00044767	0	0.000118801	-7.04305e-05	0	0	0	-0.000305785	9.17157e-06	0	0	0	0
msp_1362	Holdemania massiliensis	0.000230062	-0.000174908	0.000286569	-0.000663818	0.000976443	-0.000420547	-0.000451148	0.000165675	0.000275276	0	0.000159368	0.000211204	0.000477562	-0.000406117	-0.0006514	0.000135947	-0.00026656	-0.000443281	0.00180693	0	0	0	-0.00017327	0.000375486	-0.000463376	-0.000199123	-0.000370572	-0.00078054
msp_1363	unclassified	0	0	0	0	0	0	0	0	0	0	-1.16319e-05	-2.47543e-05	0	0	0	0	0	0	0	0	0	0	0	0	0	0	0	0
msp_1364	unclassified	0	0	0	0	0	0	0	0	0	0	0	0	0	0	0	0	0	0	0	0	0	0	0	0	0	0	0	0
msp_1365	unclassified Megasphaera	2.90025e-05	0.000698859	0	0	0	0	0	0	0	0	0	-4.91638e-05	0	0	0	0	0	0	-0.000126043	0	0	0	0	9.98506e-06	0	0	3.16408e-05	0
msp_1366	unclassified Firmicutes	0	0	-0.000483429	0	0	0	0	0	0	0	8.55098e-05	0	0	0	0	0	0	0	0	0	0	0	0	0	0	0	0	0
msp_1367	unclassified Firmicutes	0	0	0	0	0	0	0	0	0	0	-3.56616e-05	0	0	0	0	0	0	0	0	0	0	0	0	0	0	0	0	0
msp_1368	Clostridium sp. CAG:1219	0	0	0	0	0	0	0	0	0	0	1.23556e-05	-0.000113913	0	0	0	3.91598e-05	0	0	0	0	0	0	5.31066e-05	0	0	0	0	0
msp_1369	unclassified Firmicutes	0	0	0	0	0	0	0	0	0	0	-0.000178969	2.04288e-05	4.3486e-05	0	0	4.80427e-05	0	0	0	0	0	0	0	6.97713e-06	0	0	0	0.000157946
msp_1370	unclassified Firmicutes	0	0	0	0	0	0	0	0	0	0	0	0	0	0	0	0	0	0	0	0	0	0	0	0	0	0	0	0
msp_1371	unclassified Bacteroidales	0	0	0	0	0	0	0	0	0	0	0	0	0	0	0	0	0	0	0	0	0	0	0	0	0	0	0	0
msp_1372	unclassified Clostridiales	0	0	0	0	0.000103761	0	0	0	2.0526e-05	0	-0.000230888	0	0	0	-7.08697e-05	0	0	0	4.19453e-05	0	0	0	0	0.000100031	-0.00015738	0	0	0
msp_1373	unclassified Clostridiales	-1.10358e-05	0	0	0	-4.3846e-05	0	0.000126718	0	2.01931e-05	0	-0.000170113	0	0	0	7.51408e-05	0	0	-2.7498e-05	0	0	0	0	0	4.11662e-05	-0.000104991	0	0	0
msp_1374	unclassified Clostridiales	0	0	0	0	0	0	0	0	0	0	-2.9611e-05	0	0	0	0	0	0	0	0	0	0	0	8.06111e-05	0	0	0	0	0
msp_1375	unclassified Dialister	0	0	0	0	0	0	0	0	1.36923e-05	0	1.13361e-05	0	0	0	0	0	0	0	0	0	-0.000743616	0	0	0	0	0	0	0
msp_1376	unclassified Clostridiales	0	0	0	0	0	0	0	0	0	0	1.1379e-05	0	0	0	0	6.60915e-05	0	0	0	0	0	0	0	0	0	0	0	0
msp_1377	unclassified Collinsella	0	0.000177239	0	0	-7.12023e-05	0	0	-0.00019572	3.07607e-05	0	0	8.77394e-05	3.74141e-05	0	0	0.00050068	0.000743108	-0.000122009	9.35909e-05	0	0	0	0	-1.47408e-05	0	-0.000167172	0.000250458	0
msp_1378	unclassified Oscillibacter	0	0.000262501	0	0	0	0	0	8.22218e-05	0	-7.03219e-05	-0.000684344	0	0	0	0	0	0	0	0	0	0	0	3.34825e-05	7.65687e-06	0	0	-0.00010368	0
msp_1379	unclassified	0	0	0	0	-3.26232e-05	0	0	0	0	-5.35286e-05	-0.000502076	0	0	0	0	0	0	0	9.80194e-05	0	0	0	0	0	0	0	0	0
msp_1380	unclassified Clostridiales	0	0	0	0	0	0	0	0	0	0	-0.00011084	0	0	0	0	0	4.33962e-05	0	0	0	0	0	0	0	0	0	0	0
msp_1381	Butyricicoccus sp. 2789STDY5834927	0.00117985	0.000572339	0	0	0.000925551	-0.00298962	-0.000737222	-0.000482293	0.00183822	-0.000150043	-0.000317029	-0.000361195	-0.000303924	0.000984483	0.00226626	-0.000494267	-0.000730459	0.000831807	-0.000605995	0.000401934	0.000903916	0.00257292	-0.000568092	0.00661021	0.00150656	0.0012829	-0.00249814	0.000491515
msp_1382	unclassified Firmicutes	0	0.000115261	-0.000115238	0	4.1767e-05	0	0	0	0	0.000132316	-5.89929e-05	2.21776e-05	0	0	0	0	0	0	0	0	0	0	0	-9.554e-06	0	0	0	0
msp_1383c	unclassified Lachnoclostridium	0	0	0	0	0.000120432	0	0	-6.58456e-05	0	0	-0.000123719	0	0	0	0	0	-3.40259e-05	0	0	0	0	0	0	0	0	0	0	0
msp_1384	unclassified Bacteroides	1.05082e-05	0	0	0	0	0	0	0	0	0	-2.32613e-05	0	0	-4.6774e-05	0	0	-5.39099e-05	0	0	0	0	0	0	0	-4.475e-05	0	-3.52839e-05	0
msp_1385	unclassified Blautia	0	0	0	0	8.98075e-05	0	0	0.000338062	0	0.000286227	0.000649895	0.000321447	0.00161781	0	1.73756e-05	0.000346811	0.000509461	2.91124e-05	-0.000196904	0.000112364	0	0	0	0	0	-0.00026059	0.00200978	0
msp_1386	unclassified Eubacterium	-9.66206e-06	0	0	0	0	0	0	6.47232e-05	0	0	0	0	0	0	1.36549e-05	0	0	0	0	0	0	0	9.25501e-05	0	0	0	0	0
msp_1387	unclassified Proteobacteria	0	0	0	0	0	0	0	6.95963e-05	0	0	-2.12491e-05	-8.34984e-05	0	0	-1.53089e-05	0	0	2.269e-05	0	0	0	0	0	0	0	0	7.24495e-05	0
msp_1388	unclassified Coprococcus	3.12091e-05	0	0.000145148	0.000674178	-0.00034619	0	0	0.000482432	-9.09902e-05	-0.000118682	-0.000322001	7.89728e-05	0	0	9.59553e-05	-0.000399566	0.000156535	-0.000705716	0.00110748	0	0	0	0.00011717	1.95149e-05	0	-0.000322929	-0.000156	0
msp_1389	unclassified Firmicutes	0	0	0.00029303	0	0	0	0	0.000229982	0	0	-0.000371925	4.38005e-05	0.000574517	-5.05911e-05	8.36758e-05	-3.84476e-05	-3.94047e-05	0	0.000266783	0	0	0	0	-2.80907e-05	0	0	-3.32605e-05	0.000429524
msp_1390	unclassified Clostridiales	0	0	0	0	0	0	0	0	0	0	-6.20225e-05	0	-6.9683e-05	0	0	0	0	0	0	0	0	0	0	0	0	0	0	0
msp_1391	unclassified Phascolarctobacterium	0	0	0	0	0	0	0	0	0	0	0	0	0	0	0	0	0	0	0	0	0	0	0	0	0	0	0	0
msp_1392	unclassified Firmicutes	0	0	0	0	0	0	0	0	0	0	-2.62946e-05	0	0	0	0	0	0	0	0	0	0	0	0	0	0	0	0	0
msp_1393	unclassified Clostridiales	0	0	0	0	0	0	0	0	-9.41232e-06	0	-0.00016967	0	-3.45302e-05	0	0	0	0	0	0	0	0	0	0	1.3163e-05	0	0	0	0
msp_1394	unclassified	0	0	0	0	0	0	0	0	0	0	-2.71678e-05	0	0	0	0	0	0	0	0	0	0	0	0	0	0	0	0	0
msp_1395	unclassified Clostridiales	0	0	0	0	0	0	0	0	0	0	0	0	0	0	0	0	0	0	0	0	0	0	0	0	0	0	0	0
msp_1396c	unclassified	0	0	0	0	0	0	0	-0.000107418	0	0	2.25995e-05	-3.70256e-05	-4.90495e-05	0	0	3.55169e-05	0	0	0	0	0	0	0	0	0	0	0	0
msp_1397c	Catabacter hongkongensis	-0.000171574	6.7095e-05	0	0	0.000258131	-0.000115705	0	0	0.000278451	0	-0.000153929	8.36068e-05	-9.34471e-05	5.03056e-05	-0.000367721	0.000377957	-0.00014284	0.000329854	9.36979e-05	0	0	0	5.31434e-05	0.000160733	0	-0.000161624	-0.000116988	0.000240556
msp_1398	unclassified Clostridiales	0	0	0	0	0	0	0	0	0	0	0	0	0	0	0	0	0	0	0	0	0	0	0	2.0067e-05	0	0	0	0
msp_1399	unclassified Ruminococcaceae	-1.4131e-05	0	0	0	-0.000172551	0	0	0	2.39921e-05	-5.57373e-05	-0.000173967	0	0	0	0	0	0	0	0	0	0	0	0	-8.43198e-06	0	0	3.69603e-05	0
msp_1400	unclassified Firmicutes	-1.10562e-05	2.61657e-05	0	0	0	0	0	0.000701215	0	0.000351019	-0.000259122	0.000123221	0	0	0	7.94162e-05	4.14225e-05	0	7.63081e-05	0	0	0	0	0	0	0	-9.54078e-05	0
msp_1401c	unclassified Olsenella	0	0	0	0	0	0	0	0	3.32086e-05	0	0	0	0	0	-1.50026e-05	0	0	0	0	0	0	0	0	2.42452e-05	0	0	0	0
msp_1402	unclassified Clostridiales	-0.000166815	0.000499101	0	0	7.89075e-05	0	0	0	0	-4.18547e-05	-0.00126682	0.000708655	0.000240463	0	0	6.82975e-05	0.000137787	0	0	0	0	0	0	0	0	-4.76629e-05	0.000496408	0.000169231
msp_1403	Blautia sp. 2789STDY5834862	-0.000291225	-0.000139806	-0.000832661	-0.000180556	0.000876106	0.000179949	0.00013082	4.58324e-05	0.000644099	-0.000234466	-0.00107181	-0.00131232	0.000407705	0.000101965	-0.000112804	-0.000813064	0.000853618	-9.08392e-05	-0.00244587	-0.000779052	0	0	-0.000341195	0.000455699	0	-0.00369478	-0.00106669	0
msp_1404	Prevotella bivia	-0.000118924	0	0	0.00191395	7.17444e-05	0	0	-0.0001181	0.000799717	7.941e-05	-0.000291233	6.4653e-05	3.99211e-05	0.000119779	-0.000222241	0	0	0.00021025	0.000148989	0	-0.000170709	0	6.22742e-05	0.00168669	0	0.000109265	-0.000175379	0
msp_1405	unclassified Firmicutes	0	0	0	0	0	0	0	0	0	0	0	0	0	0	0	0	0	0	0	0	0	0	0	0	0	0	0	0
msp_1406	unclassified Bacteroidales	0	0	0	0	0	0	0	0	0	0	1.70257e-05	0	0	0	0	0	0	0	0	0	0	0	-3.1152e-05	0	0	0	0	0
msp_1407	unclassified Eubacterium	-2.62007e-05	0.000250005	0	0	-3.69292e-05	0	0	0	0	0	-8.9487e-05	-2.22424e-05	0	0	0	0	0.000138986	0	0	0	0	0	0	0	0	0	-0.000154231	0
msp_1408	unclassified Clostridiales	0	0	0	0	0	0	0	0	0	0	-0.000121634	0	0	0	0	0	0	0	0	0	0	0	0	1.46016e-05	0	0	0	0
msp_1409	unclassified Bacteroidales	0	0	0	0	-0.000112333	0	-0.000218974	0	-1.85308e-05	0	0	0	0	0	0	0	0	0	0	0	0	0	-7.21555e-05	-3.45238e-05	0	0	0	0
msp_1410	Lactococcus lactis subsp. cremoris	6.5134e-05	-1.88264e-05	0	0.00034188	-0.000425569	0	7.49247e-05	0.000639798	0	-0.000133856	-0.000211643	-0.000860678	0.000316545	0	5.15931e-05	0.00115876	0.000604252	0	0.000408576	0.00168071	0	0	-0.000163619	0	0	0	0.000110936	-0.000187222
msp_1412	Prevotella disiens	9.12992e-05	4.59936e-05	0.000162069	0	0	0	0	-0.000218481	3.10138e-05	-8.56111e-05	-2.611e-05	1.97292e-05	-3.9677e-05	0.00010267	-0.000188755	-3.47837e-05	5.55784e-05	0	0.000236007	0.000519931	0	0	-9.53592e-05	0.000636318	0	-3.905e-05	-4.35177e-05	0
msp_1413	unclassified Clostridiales	0	0	-0.000155231	0	-0.00135725	0	0.000548641	0.000106559	-4.30354e-05	0	-0.00029442	-3.10134e-05	0	0	4.65763e-05	0	0	0	0	0	0	0	-9.01302e-05	2.96339e-05	0	0	0	0.000312633
msp_1414	unclassified Firmicutes	0	0	0	0	0	0	0	0	0	0	0	0	0	0	0	0	-3.26376e-05	0	0	0	0	0	0	0	0	0	0	0
msp_1415	unclassified Firmicutes	5.77879e-05	0	0	0	0	0	0	0	0	0	-5.84758e-05	0	-3.28563e-05	2.07444e-05	0	0	0	0	0	0	0	0	0	0	0	0	0	0.000179111
msp_1416	unclassified	0	0	0	0	0	0	0	0	0	0	-1.5378e-05	0	0	0	0	0	0	0	0	0	0	0	0	0	0	0	0	0
msp_1417	unclassified Clostridiales	0	0	-0.000187297	0	0	0	0	0	0	0	-2.17153e-05	0	-3.01438e-05	0	0	0	0	0	0	0	0	0	0	0	0	0	0	0
msp_1418c	Streptococcus mitis	0.00271151	-0.000676627	-0.00163218	0.000560043	-0.000108445	0.000462955	0.000478189	-0.00360032	0.00788303	0.000176174	-0.000493189	-0.000459284	-0.000507296	0.00483009	-0.000422057	0.000628494	0.00221427	0.00167036	-0.00190253	0.000162868	0.000572916	-0.000645833	-0.00187148	-0.000205038	-0.000446011	-0.000493682	0.000492483	0
msp_1419	unclassified Sutterella	0	0	0	0	0	0	0	0	0	0	0	0	0	0	0	0	0	2.48928e-05	0	0	0	0	0	-1.48949e-05	0	0	0	0
msp_1420	unclassified Clostridiales	0	5.36841e-05	-0.00057431	0	0	0	0	0	0	0	-0.000586016	0	0	0	0	-8.22888e-05	0.000124715	0	0	0	0	0	0	0	0	0	0	0
msp_1421	unclassified Faecalitalea	0.00015352	0.00228575	0.000177773	0	0.00120303	0	0.000891937	-0.000372819	7.16967e-05	-0.000109184	0	-0.000210828	-0.000110985	0	-4.57421e-05	0.000223687	0.00235971	7.57802e-05	0.0003096	-0.000110833	0	0	0	-0.000126447	0	-8.71696e-05	8.84796e-05	0
msp_1422	unclassified Clostridiales	-4.00541e-05	-1.95486e-05	0	0	-0.000186706	0	0	0	3.31818e-05	0	-5.90197e-05	5.94882e-05	5.88926e-05	0	4.7112e-05	0	-6.65713e-05	-3.07349e-05	0	0	0	0	0	2.43946e-05	0	0	0	0
msp_1423	unclassified Clostridiales	1.80775e-05	0	0	0	0	0	0	0	-2.69783e-05	-3.69262e-05	-6.7624e-05	6.48808e-05	0	0	0	0.000221097	0	0	0.000119303	0	0	0	0	0	0	0	3.93189e-05	0
msp_1424	unclassified Clostridiales	0	0	0	0	0	0	0	0	0	0	0	0	0	0	0	0	0	0	0	0	0	0	0	0	0	0	0	0
msp_1425	unclassified Mycoplasma	0	0	0	0	0	0	0	0	0	0	1.63981e-05	0	0	0	0	-0.000106998	0	0	0	0	0	0	0	0	0	0	0	0
msp_1426	unclassified Clostridiales	0	0	0	0	0	0	0	0	0	0	0	0	0	0	0	0	0	0	0	0	0	0	0	3.78716e-05	0	0	0	0
msp_1427	unclassified	0	0	0	0	0	0	0	0	0	0	-2.69569e-05	0	0	0	0	0	0	0	0	0	0	0	0	0	0	0	0	0
msp_1428	unclassified Clostridiales	-0.000619721	0.000264861	0	-0.000941239	-0.000518371	-9.66396e-05	0.000541589	0.000785177	0.000283225	-0.00190392	-0.00129862	-0.00127007	-0.00261042	-0.00319055	-0.000337871	0.000651127	-0.00011356	-0.00121314	-0.00125801	0	0	0	-0.00374329	-0.000381105	0.000225089	-0.00019275	-0.000304606	-0.001455
msp_1429	unclassified Clostridiales	0	0	0	0	0	0	0	0	0	0	-4.28829e-05	0	0	0	0	0	0	0	0	0	0	0	0	0	0	0	0	0
msp_1430	unclassified Clostridiales	0	0	0	0	-7.11086e-05	0	0	0	0	0	-0.000404171	0	0	0	0	0	0	0	0	0	0	0	0	0	0	0	0	0
msp_1431	unclassified	0	0	0	0	0	0	0	0	0	0	-4.26201e-05	0	0	0	0	0	0	0	0	0	0	0	0	0	0	0	0	0
msp_1432	Citrobacter koseri	3.46552e-05	0.000600851	0	0	-4.1217e-05	0	0	0	-0.000116212	0	0	-3.68336e-05	0	-2.13458e-05	1.46613e-05	9.36102e-05	0	3.25446e-05	0	0	0	0	0	0.000138095	-9.92713e-05	0	0.000232583	0
msp_1433	unclassified Clostridiales	0	0	0	0	0	0	0	0	0	0	0	0	0	0	0	0	0	-2.85948e-05	0	0	0	0	0	0	0	0	0	0
msp_1434	unclassified Clostridiales	0	0	0	0	0	0	0	0	0	0	0	0	0	0	0	0.000147662	0	0	0	0	0	0	0	0	0	0	0	-0.000186667
msp_1435	unclassified Clostridiales	-2.16195e-05	-2.52119e-05	0	0.00101709	0	0	0	0	-6.04157e-05	-4.49218e-05	-0.00015313	-7.05615e-05	7.47912e-05	0	0	2.84522e-05	-0.000132255	-4.95658e-05	0	0	0	0	-0.000382551	-7.58784e-05	0	-5.88994e-05	5.04862e-05	0
msp_1436	unclassified Collinsella	9.19644e-05	0.000402796	0	0	0	9.2342e-05	0	0	-7.77626e-05	0	-5.05888e-05	-2.96366e-05	4.41279e-05	0	2.36641e-05	0	0	2.47199e-05	0	0	0	0	-6.53637e-05	1.88431e-05	0	0	0	0.00063857
msp_1437	unclassified Lachnoclostridium	-0.000444377	-3.59177e-05	-0.000126602	0.000247863	-0.000250744	0	0	0	-0.000135688	0	3.92213e-05	0	0	0	0	0.000105588	-3.71748e-05	-8.3741e-05	0	0	0	-0.0005	0.000195767	-5.55273e-05	0	-0.0001364	-0.00142023	0
msp_1438	unclassified Clostridiales	0	0	0	0	0	0	0	0	0	0	0	0	0	0	0	0	0	0	0	0	0	0	0	0	0	0	0	0
msp_1439	unclassified	0	0	0	0	-0.000207473	0	0	-8.123e-05	0	0	-0.000146067	3.38034e-05	0	0	0	0	0	0	0	0	0	0	-3.26771e-05	0	0	0	0	0
msp_1440	unclassified	0	0	0	0	6.58272e-05	0	0	0	0	0	-2.41095e-05	0	0	0	0	0	0	0	0	0	0	0	0	0	0	0	0	0
msp_1441c	Bacteroides faecichinchillae	1.80853e-05	0.000316327	0	0	-3.85198e-05	0.000136459	-0.000242385	0.000144704	-0.00021747	0	-1.25098e-05	0.00020643	0.000108197	-0.000195964	-0.000326566	0	0	-2.84135e-05	-0.000164609	0	-7.65126e-05	0	-3.46238e-05	-0.00109024	0	0	0	0
msp_1442	unclassified Clostridiales	0	0	0	0	3.67162e-05	0	0	0	0	8.00223e-05	-0.000338984	0	0	0	0	-3.17454e-05	-6.71362e-05	0	0	0	0	0	0	0	0	0	0	0
msp_1443	unclassified Clostridiales	0.000951971	0.000239236	0	0	0	0	0	0	0	0	-4.79735e-05	0	0	0	0	0	-0.000393213	0	0	0	0	0	0.000143257	0	0	0.000740656	3.72152e-05	0
msp_1444	Ruminococcaceae bacterium D5	0.000366673	0	0	0	-0.000209356	0.000120578	0.000402595	0.00114709	-6.39033e-05	0.000881907	-1.52891e-05	0.000585272	0	-4.40827e-05	0.000221847	0	0	0.000629195	-8.26557e-05	0	7.94473e-05	0	0.000279544	0.000234398	-7.63809e-05	0.00101416	0.00041467	0
msp_1446	unclassified Clostridiales	0	0	0	0	0	0	0.000473177	0	0	0	-3.41548e-05	0	0	0	-3.74697e-05	0	3.5283e-05	2.72562e-05	0	0	0	0	0	1.71489e-05	0	0	0	0
msp_1447	unclassified	0	0	0	0	0	0	0	0	0	0	1.25661e-05	0	0	0	0	0	0	0	0	0	0	0	0	0	0	0	0	0
msp_1448	unclassified	0	0	0	0	0	0	0	0	0	0	-4.4844e-05	0	0	0	0	0	0	0	0	0	0	0	-4.86988e-05	0	0	0	0	0
msp_1449	unclassified Firmicutes	0	0	0	0	0	0	0	0	0	0	-3.88166e-05	0	0	0	0	0	0	0	0	0	0	0	0	0	0	0	0	0
msp_1450	unclassified Clostridiales	0	0	0	0	-6.19469e-05	0	0	0	0	5.12308e-05	-5.69203e-05	0	0	0	0	0	0	0	0	0	0	0	0	0	0	-4.51901e-05	4.00814e-05	0
msp_1451	unclassified Firmicutes	0	0	0	0	0	0	0	0	0	0	-5.55032e-05	0	-3.71758e-05	0	1.13779e-05	0	0	0	0	0	0	0	0	0	0	0	0	0
msp_1452	unclassified Firmicutes	0	0	-0.000116887	0	0	0	0	0	9.42705e-06	0	-1.98314e-05	0	3.39789e-05	0	0	5.14245e-05	0	0	0	0	0	0	0	0	0	0	0	0
msp_1453	Streptococcus vestibularis	-0.000839341	-0.000356223	-0.00195953	-0.000570343	0.000628138	0.000241171	0.000267337	-0.00113103	0.00988473	0.000347815	-0.000723466	-0.00292946	-0.0013426	0.0115354	-0.000990187	-0.000585869	-0.00401757	0.000678605	-0.000878573	0	0	0.00184144	0.000110854	0.00069089	0	-0.00249556	0.000627362	-0.000830592
msp_1454	unclassified Clostridiales	0	0	0	0	-2.80063e-05	0	0	0	0	0	-2.33695e-05	0	0	0	0	0	0	0	0	0	0	0	0	0	0	0	0	0
msp_1455	unclassified Clostridiales	0	0	0	0	0	0	0	0	0	0	-0.000193526	0	5.67116e-05	0	0	0	0	0	0	0	0	0	0	0	0	0	-5.98541e-05	0
msp_1456c	Porphyromonas endodontalis	0.000401312	0	0	0	0	0	0	0	0	0	0	0	0	0	0	0	0	0	9.14104e-05	0	0	0	0	-2.74827e-05	0	0	0	0
msp_1457	Fenollaria massiliensis	-4.92431e-05	0	0	0	0	-9.13525e-05	0	-5.50364e-05	5.91157e-05	0	0.000104673	0	0	0	-0.000300262	-0.000291315	-7.19476e-05	-0.000272104	8.2911e-05	0	0	0	-3.71125e-05	-3.02225e-05	0	0	7.18803e-05	0
msp_1458	Christensenellaceae bacterium Phil10	0	0	0	0	3.49216e-05	0	0	0	0	0	0	0	0	-1.48316e-05	0	7.22293e-05	0	0	0	0	0	0	0	0	0	0	0	0
msp_1459	unclassified Firmicutes	-7.08936e-05	0	0	0	-0.000737961	-9.4764e-05	0.000197593	0	9.01592e-05	0	-6.46206e-05	0	0	-5.20076e-05	-0.000415445	8.5878e-05	0	0.000145522	0	0	4.23797e-05	0	0	0.000151654	0.000162108	8.49096e-05	-3.65159e-05	0.000547088
msp_1460	unclassified Clostridiales	0	0	0	0	-6.45187e-05	0	0	0	0	0	-3.20036e-05	0	0	-1.4635e-05	0.000102785	0	0	0	0	0	0	0	0	0	0	0	2.71095e-05	0
msp_1461	unclassified Clostridiales	0.000926997	-0.000242225	0.000131502	-0.000223647	0.000507065	0	0	-0.000484832	1.60752e-05	0.000282432	-0.00192902	0.000372259	0.0022716	0	-8.36504e-05	0.000777348	-0.000537745	3.96863e-05	-0.000500927	-0.00012784	0	0	0.000290606	7.66273e-05	0	-0.00147122	-0.000505862	0
msp_1462	unclassified Firmicutes	0	0	0	0	0	0	0	0	0	0	-0.000158149	0	0	0	0	0	0	0	0	0	0	0	0	0	0	0	0	-0.000484444
msp_1463	unclassified Aeromonadales	-1.63674e-05	0	0	0	0	0	0	0	-5.56965e-05	0	0	0	0	-2.7395e-05	0	0	0	-4.58996e-05	0	0	0	0	0	1.00911e-05	0	0	0	0
msp_1464	unclassified Bilophila	-7.50095e-05	0	0	0	-2.97815e-05	0	0.000313915	7.01478e-05	7.72382e-05	0	-0.000120241	-7.53599e-05	-5.54731e-05	0	0	-4.93694e-05	0	-4.58126e-05	-3.89049e-05	0	0	0	0	-3.05598e-05	0	5.67622e-05	0.000200234	0
msp_1465	unclassified	0	2.85964e-05	0	0	0.000236903	0	0.00171856	0.00011536	-7.49795e-05	0	-0.000329821	-7.69454e-05	-0.000233341	-1.13908e-05	1.54628e-05	0	3.57866e-05	0	-0.000134646	0	0	0	0	7.19305e-05	0	7.91381e-05	2.98691e-05	0
msp_1466	unclassified	0	0	0	0	0	0	0	0	0	-8.71154e-05	-7.22694e-05	0	0	0	0	0	0	0	7.13396e-05	0	0	0	0.000125356	0	0	0	0	0
msp_1467	unclassified Euryarchaeota	0	0	0	0	-6.85758e-05	0	0	0	0	-6.96366e-05	-2.56488e-05	0	0	2.06533e-05	0	-4.02709e-05	0	0	0	0	0	0	0	0	0	0	0	0.000147222
msp_1468	unclassified Firmicutes	0	0	0	0	-0.000266746	0	0	0.000114176	0	0.000100243	-0.000246709	-8.90996e-05	-0.000145048	0	-1.41786e-05	0	-6.9112e-05	0	0	0	0	0	0	0	0	9.67264e-05	-5.743e-05	0
msp_1469	unclassified Oscillibacter	0	0	0	0	-8.36676e-05	0	0	0	0	8.1713e-05	-0.000224534	-0.00130978	-9.56783e-05	0	-3.47893e-05	0	-0.000101585	0	-0.000165624	0	0	0	0	0	0	0.000279535	-4.63943e-05	0
msp_1471c	unclassified Firmicutes	0	0	0	0	0	0	0	0	0	0	-4.13121e-05	-6.06678e-05	-6.4686e-05	0	0	0	0.000258332	0	0	0	0	0	0	0	0	0	0	-0.000416752
msp_1472c	unclassified Eggerthella	0	0	0	0	5.23165e-05	-5.28149e-05	0	0	1.81638e-05	0	0	0	0	-3.48156e-05	-6.7502e-05	0	0	-0.000225451	0	0	0	0	-4.02574e-05	-2.12018e-05	0	0	0	0
msp_1473c	unclassified	0.000121055	-2.61601e-05	0	0	-0.000230327	0	0	-0.000127968	-0.000199046	0	-0.000175702	0.000120793	0.000238947	0.000214606	-0.00173628	-0.000171893	-3.86512e-05	5.44893e-05	0.00662883	0	0	0.000979167	-0.00139276	-7.48709e-05	-4.50491e-05	0.000123109	0.000320569	-0.000449392
msp_1474	unclassified Alistipes	1.21413e-05	0	-0.000187534	0	0	0	0	0	0	0.00017859	3.65961e-05	-9.6211e-05	-0.000110311	0	0	0	0	0	0	0	0	0	0	0	0	0	0	0
msp_1475	Bacteroidales bacterium M1	0	0	0	0	0	0	0	0	0	-4.76695e-05	-1.36628e-05	0	0	0	0	0	0	0	0	0	0	0	0	0	0.000512838	0	4.93046e-05	0
msp_1476	Haemophilus pittmaniae	0	0.000274255	0	0	0.000154636	0	0	0	-1.04203e-05	-5.77204e-05	0	0	-9.69069e-05	0	-1.43391e-05	0	0	-3.03904e-05	3.88071e-05	0	0	0	0	6.64e-05	0	0	0	0
msp_1477	Streptococcus mutans	-0.00035569	0.000328083	-0.000948531	-0.000348291	0.000900766	-7.43965e-05	0.000300713	0.000413133	0.000324209	0	-0.000169722	-0.00226843	-0.000252583	0.00464643	-0.000277602	-0.00105122	-0.00781665	-0.000467127	-0.000136694	0	0	0	0.00022298	0.000628539	0	0.000144903	-0.000155213	0.000213333
msp_1478	unclassified Lachnospiraceae	0	0	0	0.00243248	0	0	0	0	0	0	-1.33866e-05	0	0	0	0	0	0	0	0	0	0	0	7.99709e-05	0	0	0	0	0
msp_1479	unclassified Clostridium	0.000110178	0.000307073	0.000120055	0	0.000174577	0	7.55055e-05	0	-0.000129056	0	6.70991e-05	-0.00032564	6.12916e-05	0.000176885	0.000338951	-5.43942e-05	-0.000131392	-0.000150568	-3.57526e-05	0	2.35517e-05	0	0	-3.43371e-05	0	0	0	0
msp_1481	unclassified	-3.1285e-05	0.000142231	0.000123643	0	0	0	0	0.000309673	-1.08997e-05	0.000192547	-0.000248196	0.000146682	0	0	0	0.000388158	0	0	0	0	0	0	0	0	0	-6.95273e-05	0.000105715	0
msp_1482	unclassified Bacteroides	0	0	0	0	0	0	0	0	0	0	0	0	0	-6.58051e-05	0	0	0	0	0	0	0	0	0	-9.98239e-06	0	0	0	0
msp_1483	unclassified	0	2.88571e-05	0.000159219	0	-0.000637605	0	0.000361351	7.04675e-05	2.37846e-05	-0.000148768	0.000150697	-0.000112254	-4.15284e-05	0	-0.000637288	0.000188296	4.12932e-05	-0.000130378	-8.41382e-05	0	0	0	-0.000645072	7.23137e-05	-0.000220702	0	-8.17143e-05	-0.00067349
msp_1484	unclassified Ruminococcaceae	9.12189e-05	0	0	0	0	4.80974e-05	0	-5.59927e-05	-0.000306499	0	0	0	0	0.000174926	5.19846e-05	0	0	5.7004e-05	0	0	0	0	-7.55018e-05	-4.12807e-05	0	-0.000250223	6.5707e-05	0
msp_1485	unclassified Clostridiales	0.0010255	0.000383156	0	0	-0.000348777	0	0.000383665	0.000300513	-2.99932e-05	0.000995878	-8.20963e-05	0.000140787	0	-2.90861e-05	-8.42312e-05	0.000116546	-7.91142e-05	0.000717733	0	0	0	0	0.00112849	0	0	-0.000366444	0.000215398	0
msp_1486	unclassified	6.1951e-05	-1.35075e-05	0	0	0	0	0	6.39315e-05	0	8.70505e-05	-6.56466e-05	3.19774e-05	0	0	0	5.22762e-05	0	9.81618e-05	-7.93492e-05	0	0	0	0	-1.05077e-05	0	0	0	0
msp_1487	unclassified Clostridiales	0	0	0	0	0	0	0	0	0	0	0	-2.78639e-05	-3.13573e-05	0	0	0	-3.50619e-05	0	0	0	0	0	0	0	0	0	0	0
msp_1488	unclassified Alistipes	0	0	0	0	0	0	0	0	0	0	0	0	0	0	0	0	0	0	0	0	0	0	0	0	0	0	0	0
msp_1489c	Enterococcus gallinarum	0.000100434	0	0	0	0	0	0	0	-1.75584e-05	0	0	-5.29131e-05	5.69113e-05	2.13648e-05	-1.51192e-05	0	0	0	0	0	0	0	0	0.000207479	0	0	0.000200473	0
msp_1490	Roseburia sp. CAG:309	0	0	0	0	0	0	0	0	0	0	-2.48452e-05	0	0	0	0	0	0	0	0	0	0	0	0	0	0	0	-5.94068e-05	0
msp_1491	Clostridium sp. 2789STDY5834920	1.51737e-05	-1.81633e-05	-0.000237626	0	0.00011964	-4.22139e-05	-0.000113546	-0.000140814	0	-0.000334814	-0.000477949	2.0377e-05	0.000383474	0	-3.79352e-05	-8.20024e-05	0.000158464	0.00023086	0	0.000108323	0	0	-0.000204455	9.672e-05	0	0	-0.000483792	0.000325778
msp_1492	unclassified Lachnospiraceae	0.000371456	0.000150507	-0.000989168	-0.00019943	-0.000233825	0	0.000995092	0.00802396	0.000454572	-0.000266211	-0.000818532	-0.00115818	0.00100585	9.49874e-05	0.000359345	-0.000257569	0.000573971	-0.000833282	-0.000261698	0	0	0	-0.000401766	0.00018431	-0.000154912	-0.000287522	0.000571178	0.000596296
msp_1493	unclassified Bacteroides	0	0	0	0	0	0	0	0	0	0	0	0	0	0	0	0	0	0	0	0	0	0	0	2.51645e-05	0	0	0	0
msp_1494c	unclassified	1.14468e-05	0	0	0	0	0	0	0.000112414	0	0.000873285	2.28843e-05	0	3.48991e-05	0	0	0	0	0	0	0	0	0	0	0	-4.4776e-05	0	0	0
msp_1495	unclassified Phascolarctobacterium	0	0	0	0	0	0	0	0	3.30666e-05	0	0	1.82249e-05	0	0	0	0	7.40614e-05	0	0	0	0	0	0	7.23582e-05	-6.70362e-05	0	0	0
msp_1496	unclassified Clostridiales	-4.18085e-05	0	0	0	0	0	0	0	0	-5.18548e-05	0	0	0	0	0	0	0	0	0	0	0	0	7.77462e-05	0	0	-0.000294762	-0.000190754	0
msp_1497	unclassified Firmicutes	-1.12503e-05	0	0	0	0	0	0	0	0	0	0	0	0	0	0	-6.10969e-05	-5.0107e-05	0	0	0	0	0	0	0	0	0	0	0
msp_1498	unclassified Firmicutes	0	0	0	0	0	0	0	0	0	0	-1.49835e-05	0	0	0	0	0	0	0	0	0	0	0	0	0	0	0	0	0
msp_1499	unclassified Lachnospiraceae	-2.39281e-05	0	0	0	-4.63698e-05	0	0.000112594	-6.72835e-05	0.000128766	0	0	0	0	0.000121082	-0.000142358	0	4.09998e-05	0	0	0	-0.000332336	0	0	0.000162562	0	0	0	0
msp_1500	unclassified	0	0	0	0	0	0	0	0	0	0	0	0	0	0	0	0	0	0	0	0	0	0	0	0	0	0	0	0
msp_1501	unclassified Clostridiales	0	0	0	0	0	0	0	0	0	0	0	0	0	0	0	0	0	0	0	0	0	0	0	0	0	0	0	0
msp_1502	unclassified	0	0	0	0	0	0	0	0	0	0	1.21659e-05	0	3.74563e-05	0	0	0	0	0	0	0	0	0	0	0	0	0	0	0
msp_1503c	unclassified	0	0	0	0	0	0	0	0	0	0	-4.54157e-05	0	0	0	0	0	0	0	0	0	0	0	0	0	0	0	0	0
msp_1504	unclassified Firmicutes	0	0	0	0	-3.88846e-05	0	0	0	0	0	0	0	0	0	0	0	0	0	0	0	0	0	0	0	0	0	0	0
msp_1505	unclassified	0	0	0	0	0	0	0	0	0	0	-0.000217022	-2.68822e-05	-3.11515e-05	0	0	0	0	0	0	0	0	0	0	0	0	0	0	0
msp_1506	unclassified	0	0	0	0	0	0	0	0	0	0	-2.36213e-05	0	0	0	0	0	0	0	0	0	0	0	0	0	0	0	0	0
msp_1507	unclassified Clostridiales	0	0	0	0	0	0	0	0	0	0	0	0	0	0	0	0	0	0	0	0	0	0	0	0	0	0	0	0
msp_1508	unclassified Clostridiales	0	0	0	0	0	0	0	0	-1.01743e-05	0	-1.69508e-05	0	0	0	0	0	0	0	0	0	0	0	0	0	0	0	0	0
msp_1509	unclassified	0	0	0	0	-4.14422e-05	0	0	0	0	0	5.54475e-05	-4.6854e-05	-4.30538e-05	0	0	0	0	0	0	0	0	0	6.54247e-05	0	0	4.94607e-05	0	0
msp_1510c	unclassified	0	0	0	0	0	0	0	0	0	0	-3.23854e-05	2.31167e-05	-4.16929e-05	0	0	3.77309e-05	0	0	0	0	0	0	0	0	0	0.000209132	-2.82841e-05	0
msp_1511c	Enterobacter asburiae	0.000444123	0.00109763	0	0	0	0	0	0	6.61831e-05	0	0	-6.42714e-05	0	0.000186717	0.000307594	3.04924e-05	0	0	0	0	0.000157384	0	-9.23589e-05	-0.000107319	-8.68042e-05	0.00013635	2.96774e-05	0.000358124
msp_1512	unclassified Firmicutes	0	0	0	0	0	0	0	0	0	0	0	0	0	0	0	0	0	0	0	0	0	0	0	0	0	0	0	0
msp_1513	Gordonibacter sp. An232A	-7.39347e-05	-8.18714e-05	0	0	0	0	0	0	0	0.000164306	1.49661e-05	0	7.46788e-05	0	0	-0.000138376	-0.000805934	0	-0.00013999	0	0	0	-7.26509e-05	9.27774e-06	0	0	-0.00018895	0
msp_1514	unclassified Clostridiales	0	0	0	0	0	0	0	0	0	0	0	1.766e-05	0	0	0	0	0	0	0	0	0	0	0	0	0	0	0	0
msp_1515	unclassified Lachnoclostridium	-0.00027291	-0.000431418	0.000382122	0.000350039	-0.00148279	6.15173e-05	0	-0.000234151	-3.0598e-05	-0.000235316	-0.000373513	0.000183452	-0.00023532	5.29601e-05	0	0.00112823	-8.7777e-05	-0.000173568	7.30125e-05	0	0	-0.0014375	-4.57937e-05	4.27615e-05	9.7924e-05	-0.000322787	-0.000370363	0
msp_1516	unclassified Clostridiales	0	0	0	0	0	0	0	8.15012e-05	0	0	-0.00013578	0	0	0	0	0	0	0	0	0	0	0	0	0	0	0	0	0
msp_1517	unclassified Firmicutes	0	0	0	0	0	0	0	0	0	0	-0.000208882	0	0	0	0	0	0	0	0	0	0	0	0	0	0	0	0	0
msp_1518	unclassified Clostridiales	0	0	0	0	0	0	0	0	0	0	0	0	0	0	0	0	0	0	0	0	0	0	0	0	0	0	0	0
msp_1519	unclassified Flavonifractor	6.96368e-05	-7.6515e-05	0	0	0	0	0	0	-5.13837e-05	-5.28264e-05	1.22936e-05	0	0.000189708	0	0	0.00019593	0	0.000131245	0	0	3.53768e-05	0	0.0003282	4.5346e-05	0	5.6559e-05	6.26793e-05	0
msp_1520	unclassified Ruminococcaceae	-6.67574e-05	0.00014944	0	0	5.48049e-05	0	0	0	-9.16771e-05	0	0	-4.5105e-05	0	0	0	0	0	0	0	0	0	0	0	-2.37269e-05	0	0	0	0
msp_1521	unclassified Clostridiales	0	0	0	0	0	0	0	0	0	0	0	0	0	0	0	0	0	0	0	0	0	0	0	0	0	0	0	0
msp_1522	unclassified Alistipes	0	0	0	0	0.000319936	0	0	0	-5.25839e-05	0	0	0	0	0	0	0	0	5.14233e-05	0	0	0	0	7.00848e-05	-1.79721e-05	0	0	0	0
msp_1523	Desulfovibrio sp. Zagget14	9.11414e-05	0	0	0	0	0	0	0	1.70261e-05	0	-1.49807e-05	0	0.000130093	-2.81074e-05	0	0	0	0.000102953	0	0	0	0	0	3.41411e-05	0	-4.41601e-05	-3.65632e-05	0
msp_1524	unclassified	0	0	0	0	-0.0001457	0	0	0	0	7.0281e-05	0	0	0	0	0	0	0	0	0	0	0	0	0	-1.06711e-05	0	0	0	0
msp_1525	Clostridium hylemonae	-0.000175554	3.92574e-05	0	0	-0.000118662	0	0	0	3.956e-05	0.000273644	0	0.00021281	0	7.45428e-05	3.39995e-05	0	-0.000165146	0.000112208	0	0	0	0	0	-0.000157879	0	0	0	0
msp_1526	unclassified Succinatimonas	1.38916e-05	0	0	0	0	0	0	0	-2.92358e-05	0	2.82082e-05	0	0	0	0	0	0	0	0	0	0	0	0	0	0	0	0	0
msp_1527	unclassified Ruminococcus	-3.03844e-05	-1.90397e-05	0	0	0.000188629	3.29097e-05	8.08201e-05	0	4.06782e-05	0	5.04363e-05	0.000112988	0.000174459	3.20552e-05	3.74623e-05	0	-6.80869e-05	3.89563e-05	0	0	0	0	0	1.03676e-05	0	0	0	-0.000218047
msp_1528	Olsenella sp. An188	0	0	0	0	0	0	0	0	1.91956e-05	0	0	0	0.000181241	0	0	0	0	-5.70223e-05	0.000191624	0	0	0	0	0	0	0	0	0
msp_1529	unclassified Lachnoclostridium	0	0	0	0	0	0	0	0.000140774	0	-0.00012513	6.81962e-05	-0.000124607	-6.97135e-05	0	0	0.00086411	-3.57123e-05	-0.000100828	-0.000146314	0	0	0	0	0	0	0	0	0
msp_1530c	unclassified	-8.26568e-05	0	0	0	5.102e-05	0	0.000250163	-6.11862e-05	-0.000745763	0	0	0	0	-0.000676777	0.000116711	-3.88979e-05	-9.21479e-05	-0.000256343	0	0.000175378	-0.000341365	0	-0.000767641	0.000149859	0.000624591	-4.63646e-05	-4.95965e-05	0
msp_1531c	unclassified Olsenella	0.000100147	-9.97076e-05	0	0	-9.06716e-05	7.4742e-05	0	-0.00086832	-6.75449e-05	0.000221408	-0.00039204	0.000114004	0.00145671	0	-3.34875e-05	0	0.00093233	0.000681006	-7.3778e-05	0	0	0	0	-2.86792e-05	0	-7.54393e-05	-0.000174583	0.00055297
msp_1532	unclassified	0	0	0	0	0	0	0	0	0	0	0	0	0	0	0	0	0	0	0	0	0	0	0	0	0	0	0	0
msp_1533	unclassified Clostridiales	0.000371134	0.000486656	0.000255026	0	0.000171572	-0.000139498	0.00105228	0.000167953	0.000221154	-4.75476e-05	-0.00051378	-0.000570216	-0.000193131	0.00037475	0.000475384	-0.000120376	-0.000200287	-0.000613961	-0.00159898	-8.68839e-05	0	0	-0.00288815	0.000176403	0.000549099	0.000222029	0.000128842	0.000445926
msp_1535	unclassified Clostridiales	0	0	0	0	0	0	0	0	0	0	-5.66907e-05	0	0	0	0	0	0	0	0	0	0	0	0	0	0	0	0	0
msp_1536	unclassified Clostridiales	0	0	0	0	0	0	0	0	0	0	-6.6789e-05	0	0	0	0	0	0	0	0	0	0	0	0	0	0	0	0	0
msp_1538	unclassified Firmicutes	0	4.25843e-05	0.000753236	-0.00022792	0.000310746	0	0.000133559	0.00369701	0	0.000333764	-0.000298846	-0.000200076	-0.000203105	0	0	-0.000135851	0	0	5.15129e-05	0	0	0	-0.000174015	-9.46376e-06	0	0	6.35546e-05	0
msp_1539	unclassified	0	0	0	0	0	0	0	7.03669e-05	0	0	0	0	0	0	0	0	0	0	0	0	0	0	0	0	0	0	0	0
msp_1540	unclassified Clostridiales	0	0	0	0	0	0	0	0	0	0	2.76735e-05	0	0	0	0	0	-3.20825e-05	0	0	0	0	0	0	0	0	0	0	0
msp_1541	unclassified Clostridiales	0.000231254	0.000292421	-0.000479535	0	0.00126479	0	0	0.000791717	-0.000218571	0	-0.000347366	0.000310366	0.000240262	-8.25743e-05	0.000559151	-0.000584281	0.00076664	0.0008018	0.00125918	0	0	0	0.000542232	0.000409215	0.000204829	0.000475226	0.000409781	0
msp_1542	unclassified Firmicutes	0	0	0	0	0	0	0	0	0	0	-9.8317e-05	0	0	0	0	0	0	0	0	0	0	0	0	0	0	0	0	0
msp_1543	Streptococcus oralis	0.00106724	-0.000694858	-0.000502695	-0.000770655	0.000292884	-0.000178012	0	-0.00108683	0.00946601	0.00149261	-0.000851359	-0.000269521	-0.000808461	0.00722207	-0.000215812	-0.00040593	0.00154361	0.00235388	-0.00160511	0.000418369	0.000161805	0.000870833	-0.00163552	0.000485234	-0.000213643	0.00049413	0.00151153	0
msp_1545	unclassified	-1.0362e-05	-3.45615e-05	-0.000308495	0	-0.000150102	0	0	6.9736e-05	0	0.000987664	0.000217612	2.94026e-05	7.63697e-05	0	-7.3962e-05	8.73313e-05	0	-0.000274288	0.000104615	0	0	0	-5.38222e-05	0	0	0	0.000191559	0
msp_1546	unclassified Muribaculaceae	0	0	0	0	0	0	0	0	-4.43913e-05	0	0	0	0	0	0	0	5.12229e-05	0	0	0	-0.000117438	0	-0.000143221	0	0	0	0	0
msp_1547c	Lactobacillus farciminis	0	0	0	0	0	0	0	0	9.22006e-06	0	0	0	0	0	0	0	0	0	0	0	0	0	0	7.20288e-05	0	0	0	0
msp_1548	unclassified Ruminococcaceae	0	0	0	0	-0.000228039	0	0	8.83284e-05	0	0.000150228	-6.56996e-05	-8.75763e-05	0.000251426	0	0	0	0	6.50248e-05	0	0	0	0	-7.70343e-05	0	0	0	0	0
msp_1549	unclassified Oscillibacter	0	0	0	0	3.32526e-05	0	0	-7.04508e-05	0	0	0.000281844	0	0	0	0	0	0	0	0	0	0	0	0	0	0	-4.55917e-05	-6.83052e-05	0
msp_1550	unclassified Clostridiales	1.63684e-05	4.64497e-05	0	0	-4.94861e-05	0	0	8.24999e-05	0	0	-3.35794e-05	-2.29811e-05	0	0	7.3385e-05	0	0	-5.28687e-05	0.000225604	0	0	0	0	0	0	0	0	0.000155556
msp_1551	unclassified Clostridiales	0	0	0	0	0	0	0	0	1.05657e-05	0	-0.000241109	2.55632e-05	0	0	0	0	0	0	0	0	0	0	7.13964e-05	0	0	0	0	0
msp_1552	unclassified Lachnospiraceae	1.12885e-05	0	0	0	0	0	0	0	0	0	-0.000685099	0	0	-3.32159e-05	0	0	0	0	0	0	0	0	0	0	0	0	0	0
msp_1553	unclassified Blautia	2.05447e-05	0	0	0	0	0	-6.7284e-05	-0.000388086	4.24771e-05	0.000309596	0.000210031	0.000123101	3.53493e-05	0	-8.75744e-05	0.000321308	-0.000123926	0	0.000204904	0	0	0	0	2.29419e-05	0	6.21767e-05	0.0021304	0
msp_1554c	Kluyvera georgiana	-6.16704e-05	-4.76887e-05	0	0	0	0.000161926	0	0	-0.000170518	0	0	0	0	-3.02313e-05	5.14777e-05	0	0	-4.29177e-05	0	0	-0.000570445	0	0	0.000123275	0	0	0	0
msp_1555c	unclassified Clostridiales	0	0	0	0	0	0	0	0	0	0	-1.56296e-05	0	0	0	0	0	0	0	0	0	0	0	0	0	0	0	0	0
msp_1556	Holdemania filiformis	0.00236825	0.00184609	-0.0024494	0	-0.00167327	-0.00259586	-0.00190366	-0.000555777	0.00116561	-0.000819235	-0.000650768	-0.000413522	-0.00107041	-0.00176362	0.00372814	0.00201107	-0.00106384	-0.00100398	0.000565374	-0.000702257	-0.00217508	-0.000715741	-0.000515038	0.00172565	0.000873225	0.000835213	0.00209395	-0.000983638
msp_1557	unclassified Eggerthellaceae	-1.96923e-05	0.000126779	0	0	0	0	0	0	0	0.000217704	1.58295e-05	0	-2.77265e-05	0	0	0	5.73932e-05	0	0	0	0	0	0	0	0	0	0	0
msp_1558	unclassified Clostridiales	0.000381303	0.000435919	0	-0.000317094	0.000813084	-0.00054121	-8.86347e-05	0.000545371	0.000693919	-0.000265233	-0.000111825	-0.00180223	-0.000707953	3.46148e-05	0.000294694	0.00149162	0.00137633	0.00126945	0.00080038	0	0	0.00206111	-9.86956e-05	0.000100764	0.000116012	-0.000708588	0.00131101	0
msp_1559c	Porphyromonas sp. HMSC065F10	-1.08045e-05	0	0	0	2.29848e-05	-0.000109231	0	0	-4.8494e-05	0	0	0	0	0	0	0	0	0	0	0	0	0	0	8.44522e-05	0	0	0	0
msp_1560	unclassified Bacteroidales	0	0	0	0	0	0	0	0	-1.50806e-05	0	-4.19799e-05	0	0	0	0	0	0	0	0	0	-0.000197657	0	0	0	0	0	0	0
msp_1561	unclassified	0	0	0	0	0	0	0	0	0	0	0	0	0	0	0	0	0	0	0	0	0	0	0	0	0	0	0	0
msp_1562	unclassified Clostridiales	0.00163166	0.00157324	0	0	0	3.50958e-05	-9.01752e-05	0	-0.000206897	0.000478552	-0.00191474	0	0	2.21811e-05	5.14883e-05	-0.000226442	0.000191071	-4.93288e-05	0	0	0	0	0.000126375	-8.89262e-05	0	9.7728e-05	0.000248775	0
msp_1564	unclassified Firmicutes	-9.39935e-05	0	0.000106793	0	-0.0015296	-7.91922e-05	0.000227635	0.000128763	9.5439e-05	-0.000120517	-0.000587674	-0.000226574	-0.00022036	-1.72608e-05	-0.0011925	-0.000120494	0.00239711	4.02393e-05	0.00022941	0	0	0	0	-6.69399e-05	0.000621212	-4.94437e-05	0.000315988	0.000615
msp_1565	unclassified Clostridiales	0	0	0	0	0	0	0	0	0	0	0	0	0	0	0	0	0	0	0	0	0	0	0	0	0	0	0	0
msp_1566	unclassified Clostridiales	0	0	0	0	0	0	0	0	0	0	-1.34279e-05	0	0	0	0	0	0	0	0	0	0	0	0	0	0	0	0	0
msp_1567	Clostridium disporicum	-0.000244126	0.00051015	-0.000161176	0	-4.62029e-05	0	7.0707e-05	0	0	-5.48547e-05	-0.000193544	9.5639e-05	-0.000153849	2.40127e-05	0.000176366	8.01322e-05	0.000224716	0.000111749	-3.50291e-05	0	0	0	0	-9.47629e-05	0	0	0	-0.000477566
msp_1568	unclassified Prevotella	3.4204e-05	-2.69197e-05	0	0	0	0	0	0	-2.1662e-05	0	0	0	5.34586e-05	0	0	6.94731e-05	0	0	0	0	0	0	0	0	0	0	0	0
msp_1570	Porphyromonas asaccharolytica	2.34252e-05	0	0	0	0.00205347	-0.000106082	0	0	8.68103e-06	0.000129696	0	0.000195264	0	0	-0.00026037	6.79624e-05	0	4.08291e-05	0	0	0	0	0	1.83907e-05	0	0	0.000109449	0
msp_1571c	Tissierellia bacterium S7-1-4	0	0	0	0	0	-5.04923e-05	0	0	5.01322e-05	0	0	-1.67199e-05	0	0	0	0	3.61263e-05	0	0	0	0	0	0	1.63409e-05	0	0	0	0
msp_1572	unclassified Pseudoflavonifractor	-6.46177e-05	0	0	0	0.00017326	5.00642e-05	0	0.000194508	-3.75148e-05	0	0	9.9135e-05	4.21579e-05	2.04512e-05	0	-0.000137157	0.000153373	-6.73558e-05	0	0	0	0	0.000295311	0.000336276	7.77335e-05	0.00025886	0	-0.000204
msp_1573	unclassified Clostridiales	0	0	0	0	0	0	0	0	0	0	-1.14057e-05	0	0	0	0	0	0	0	0	0	0	0	0	0	0	0	0	0
msp_1574	unclassified	0	0	0	0	0	0	0	-0.000159816	0	0	1.41726e-05	1.73368e-05	0	0	0	0	0	0	0	0	0	0	0	0	0	0	0	0
msp_1575	unclassified Ruminococcus	0	0	0	0	0	0	0.000191046	-0.000123237	2.50478e-05	4.62836e-05	1.37077e-05	9.19587e-05	0.000117869	0	-6.4111e-05	0	0	0	0	0	0	0	0	0	-4.75453e-05	0	0	0
msp_1576	unclassified	-3.84279e-05	0	0	0	0	0	0	0	3.72463e-05	0	-1.26896e-05	0	0	0.000153059	0	0	0	-0.00012235	0	0	2.73094e-05	0	0	0	0	0	0	0
msp_1577	unclassified Firmicutes	0	0	0	0	0	0	0	0	0	0	0	0	0	0	0	0	0	0	0	0	0	0	0	0	0	0	0	0
msp_1578c	Bacteroides oleiciplenus	0	0	0	0	0	-8.81619e-05	0	0	0	0	-2.917e-05	0	0	0.000252741	-6.49319e-05	0	0	0	0	0	0	0	0	0	0	0	0	0
msp_1579c	unclassified	-1.04056e-05	0	0.000399268	0	-0.00133126	0	0	-0.000192036	0	-0.00010159	-0.00106254	-0.000322928	0.00106624	-1.85774e-05	8.59329e-05	0	0	0	0	0	2.37933e-05	0	-0.000114923	-8.95322e-06	0	-4.18723e-05	0	0.00023808
msp_1580c	unclassified	2.2462e-05	0.000171939	0	0	-0.000265609	0	0.000333136	0	-1.98984e-05	0	-0.000435073	-5.1338e-05	0	0	0	0	0	0	0.000185166	0	0.000247584	0	-9.30759e-05	-2.57604e-05	0	0	4.59455e-05	0
msp_1581	unclassified Flavonifractor	0.00277442	0.000890374	0	0.00108727	-0.000403854	0	0	0.000535153	-0.00018917	-0.000637638	0.000361343	0.0012929	0.00149776	-4.71641e-05	-8.29928e-05	0.000285255	-0.000361483	0.000131803	0.000164893	0	-0.000275898	0	0.000645435	0.000104357	0.000352229	-0.00116511	-0.000544922	0.000845556
msp_1582	unclassified Butyricimonas	0	0	0	0	0	3.55368e-05	0	0	-9.78333e-05	0	0	0	0	-0.000120792	1.62981e-05	0	0	-0.000101562	0	0	-0.000225867	0	-0.000104328	-6.97564e-05	-0.000119084	0	0	0
msp_1583	unclassified Mycoplasma	0	0	0	0	0	0	0	0	0	0	-2.11425e-05	0	0	0	0	0	0	0	0	0	0	0	0	0	0	0	0	0
msp_1584	Pseudoflavonifractor capillosus	-0.000540442	-0.000159884	0.000156201	0	-0.000536015	-0.000274086	6.94925e-05	0.000364273	-0.000796227	5.66534e-05	-0.000885754	0.000156834	0.000167826	-2.26759e-05	5.42525e-05	0.000138591	-0.000804044	-0.000145505	0.000577778	0	3.69597e-05	0.00251042	0.0071605	0.000204467	0	-0.000703554	0.000342508	0
msp_1586	unclassified Clostridiales	0	0	0	0	0	0	0	0	0	0	0	0	0	0	0	0	0	0	5.45809e-05	0	0	0	0	0	0	0	0	0
msp_1587	unclassified	0.000148357	0	0	0	0	0	0	0	0	5.0633e-05	-0.000210618	0	0	0	0	0.000104509	0	-5.97227e-05	0	0	0	0	9.00838e-05	0	0	-6.9213e-05	-0.000115785	0
msp_1588	unclassified Oscillibacter	-7.41336e-05	3.61748e-05	0	0	-0.000310746	0	0	-4.5544e-05	1.70477e-05	0	-1.22847e-05	-5.30649e-05	0	0	0	0	0	0	0	0	0	0	-0.000100427	0	-4.39564e-05	0	0	0
msp_1589	unclassified	0	0	9.31868e-05	0	-5.15189e-05	0	0	0.0020593	0	-0.000173383	-0.00261587	0	-3.82465e-05	0	0	0	0	0	0.000384006	0	0	0	0	0	0	0	3.39443e-05	-0.000602168
msp_1590c	Holdemania sp. Marseille-P2844	-0.000155595	-3.5658e-05	0.000575653	0.000786325	0.000290858	0	0	0.000480917	-2.14176e-05	0.000164891	-0.00044743	-0.000455108	0.000133705	5.71084e-05	-0.0002234	-0.000322216	-0.00067703	0	-0.000609774	-0.000108354	0	0	0.000522048	-5.91413e-05	0	0.00248289	0.000348551	0
msp_1591	unclassified	0	-1.26126e-05	0	0	0	0	0	0	0	0	0	0	0	0	0	0	0	0	0	0	0	0	0	0	0	0	0	0
msp_1592	unclassified	1.15587e-05	0	-0.000150893	0	0.000136593	0	0	0.00286862	0	-0.000520802	-0.00100644	-5.60119e-05	0	0	0	0	0	2.99479e-05	-0.000107549	0	0	0	0.000154394	0	0	0.000262904	-0.000335816	-0.000171246
msp_1594	unclassified Clostridiales	0	0	0	0	0	0	-7.83865e-05	0	0	0	3.90042e-05	0	-3.69526e-05	0	0	3.53365e-05	0	0	4.20351e-05	0	0	0	0	0	0	0	0	0
msp_1595	unclassified Clostridiales	0	0	0.000139842	0	0	0	0	0	0	0	0	0	0	0	0	0	0	0	0	0	0	0	0	0	0	0	0	0
msp_1596	unclassified Libanicoccus	-0.000127166	2.17052e-05	0	0	0	0	0	-0.000108142	0	0	0.000128181	0	9.76407e-05	0	0	7.72592e-05	-2.64444e-05	3.21395e-05	0	0	0	0	0	0	0	-4.98313e-05	-8.60944e-05	0
msp_1597	unclassified Clostridiales	0	0	0	0	0	0	0	0	0	0	0	0	3.97877e-05	0	0	0	0	0	0	0	0	0	0	0	0	0	0	0
msp_1598	unclassified	0	0	0	0	0	0	0	0	0	0	-3.98376e-05	2.36309e-05	0	0	0	0	0	0	0	0	0	0	0	0	0	0	0	0
msp_1599	Streptococcus sp. I-P16	-0.00130033	-0.000589614	0	0	-0.000634255	-0.000461208	0.000907909	0	0.00486873	-5.75925e-05	-0.000207385	-0.000574094	0.00023548	0.000350398	-0.0029985	0.000304564	0.00123816	-0.00578168	0.000254363	-8.30317e-05	9.39024e-05	0	-7.97373e-05	-0.00309635	-0.000239212	-0.000196613	-0.000240514	0
msp_1600	unclassified Porphyromonas	3.95168e-05	0	0	0	0.000628882	-9.51846e-05	0	0	2.10911e-05	0.00323988	0	3.69202e-05	-3.32937e-05	0	3.93457e-05	0.00375814	0	-9.0068e-05	-0.000101948	0	0	0	0	0	0	0	0.000207837	0
msp_1601	unclassified Clostridium	-0.000286592	-1.59637e-05	0	0	0	0	0.000427647	0	-0.000367508	0	3.6419e-05	5.4226e-05	9.07401e-05	5.67935e-05	-0.000113265	0.000194426	-2.83664e-05	8.81382e-05	0.000218096	0	0	0	-3.3506e-05	0.000120644	0	0	0	0.00023037
msp_1603c	Atopobium parvulum 2	0.00944328	0.00161944	0	0	0.000450499	5.73603e-05	0.000215682	-0.000755264	0.00379793	0	-4.19179e-05	0.000200715	0.000143678	0.000231507	4.69118e-05	0.00017861	0.000507267	0.00147622	0	0	0	0	0	-6.48399e-05	0	0.000422517	0.000871863	0
msp_1604	unclassified Lachnospiraceae	0.000251898	0	0	0	0	0	0	0	-5.84525e-05	0	0	6.21858e-05	0	-3.44531e-05	0	0	0.000300366	0	0	0	0	0	7.80977e-05	2.96844e-05	0	0	0	0
msp_1605	unclassified Clostridiales	0	3.18372e-05	0	0	0	0	0	0.000363557	0	0	1.24907e-05	0	3.81796e-05	0	2.00093e-05	7.94715e-05	0	4.45441e-05	0	0	0	0	0	0	0	0	-0.000144894	0.000359064
msp_1606c	Olsenella sp. KH3B4	0	0	0	0	0	0	0	0	0	0	0	0	0	0	0	0	0	0	0	0	0	0	0	1.33046e-05	0	0	0	0
msp_1607c	unclassified Olsenella	0	0	0	0	0	0	0	0	0	0	0	0	0	0	0	0	0	0	0	0	0	0	0	0	0	0	0	0
msp_1608c	Clostridium sp. 2789STDY5608831	0.00085866	0.0013544	0.000483653	0	-0.000514113	-0.000250351	-0.000110514	-0.000474539	-0.000323359	-0.000120892	-0.000929259	-0.00143797	-4.15433e-05	-0.000222749	0.00039134	-0.000204092	0.000819676	-0.00197828	0.000566594	-8.68839e-05	0	0	-0.000432288	-0.000407236	0	0	0.00172507	0.000335767
msp_1609c	unclassified	-1.36688e-05	0.000196274	0.00014955	0	-9.1227e-05	0	0	0.00121313	0	0.00107612	-0.000197818	-0.000134041	0.000203354	0	0	0.0008648	5.55156e-05	0	0	0	0	0	0.000155132	0	0	0	0	0
msp_1610	unclassified	-7.35936e-06	0	0	0	0	0	0	0	0	0	-5.41712e-05	-0.000382497	-8.09855e-05	0	0	0	0	0	0	0	0	0	-4.38281e-05	0	-5.07074e-05	5.90107e-05	0	0
msp_1611	unclassified Firmicutes	-0.000223625	-2.15768e-05	0	0	-3.82333e-05	0	0	8.84266e-05	-2.84762e-05	0.000114208	-0.000372609	0.000106584	0.000185246	3.52271e-05	0	0.000126333	-0.000115873	-0.000176484	0.000124714	0	0	0	7.06017e-05	8.14364e-06	0	-8.31726e-05	8.72688e-05	0
msp_1612	unclassified Clostridiales	0	0	0	0	0	0	0	0.000131969	0	0.000101647	2.76451e-05	0	0	0	0	0	-3.39293e-05	0	0	0	0	0	0	0	0	0	0	0
msp_1613	unclassified Selenomonadaceae	-1.25348e-05	0	0	0	0	-2.90338e-05	0	0	0	-5.77932e-05	0	0	0	0	3.90875e-05	0	0	-2.81741e-05	0	0	0	0	0	0	0	0	0	0
msp_1614	unclassified Lachnospiraceae	0	0	0	0	0	0	0	0	0	-5.29776e-05	-0.000108157	3.40465e-05	0.000100934	0	0	0	0	0	0	0	0	0	0	0	0	0	0	0
msp_1616	unclassified	0	0	0	0	0	0	0	0	0	0	2.55244e-05	0	0	0	0	0	0	0	0	0	0	0	0	0	0	0	0	0
msp_1617	unclassified Lachnospiraceae	0	0	0	0	0	0	0	0	0	0	0	0	0	0	0	0	0	0	0	0	0	0	0	0	0	0	0	0
msp_1618	Alistipes sp. An54	-9.17712e-06	0	0	0	0	0	0	0	0	0.000158154	-3.32409e-05	0.000135669	0	0	0	0	4.13754e-05	-2.55573e-05	0	0	0	0	0	-6.94114e-06	0	7.29001e-05	0	0
msp_1621	unclassified	0	0	-0.00105528	0	-0.00327021	0	0	0	4.37687e-05	0	-0.000134841	0.000174039	0.000123198	0	3.58833e-05	0.000591488	9.32015e-05	-0.000107226	0	0	0	0	0.000156443	0.000744963	0	0	0.000584713	0.00115053
msp_1622	Clostridium sp. 2789STDY5608793	-0.000170728	0.000125291	-0.00127402	0	-0.000347065	-0.000325509	0.00171752	-0.000263091	-0.000912527	-0.000282125	-0.000635159	-0.00153198	0.000289225	-0.000301008	0.00131635	0.000121129	-0.000199589	-0.00232465	-0.000963731	-0.000283208	-0.000706782	-0.000429167	-0.000324102	-0.00120863	-0.000340158	0.000437092	0.000370155	0
msp_1623	unclassified	0	0	0	0	0	0	0	0	0	0	0	-9.06009e-05	-6.75082e-05	0	0	0	9.61667e-05	0	0	0	0	0	0	0	0	0	0	0
msp_1624	unclassified Blautia	2.30183e-05	0	0	0	-0.000360091	0	0	0	-0.000204288	0	0	0	0	0	1.48334e-05	0	0	2.89705e-05	0	0	0	0	5.05552e-05	0	0	0	0	0
msp_1625	unclassified Firmicutes	0	0	0	0	0	0	0	0	0	0	-1.48687e-05	0	0	0	0	0	0	0	0	0	0	0	0	0	0	0	0	0
msp_1626	unclassified Firmicutes	0	0	0	0	0	0	0	0	9.88861e-06	0	1.6032e-05	4.75531e-05	3.20683e-05	0	0	0	0	0	0	0	0	0	0	0	0	0	0	0
msp_1627	unclassified Gordonibacter	1.16118e-05	0	0	0	0	-4.49908e-05	0	0	-0.000170061	0.00037794	4.14807e-05	0.000370042	0	0	-1.75076e-05	5.75696e-05	0	0	0	0	0	0	0	5.48798e-05	0	0	0	0
msp_1628	Lachnoclostridium sp. An118	-6.11832e-05	0.000100717	0	0.000247863	0	0	0	-5.72878e-05	2.94536e-05	0.000281203	-1.20198e-05	0.000120371	-0.000137295	0	-4.91707e-05	0.000109436	0	-0.000206096	0	0.00073735	0	0	-8.44363e-05	-7.33496e-06	0	-4.06184e-05	0	0
msp_1629	unclassified	1.79296e-05	0	0	0	2.4012e-05	0	0	6.54308e-05	9.31483e-06	-4.73489e-05	0.000135251	7.68086e-05	6.52265e-05	0	0	0	8.36188e-05	0	0	0	7.49375e-05	0	0	-6.73749e-05	-0.000144713	0	0	-0.000355907
msp_1631	Oxalobacter formigenes 2	0	0	0	0	0	0	0	0	0	0.000263148	1.52903e-05	0	0	0	0	0	0	0	0	0	0	0	0	0	0	0	0	0
msp_1632	unclassified Bacteroidales	0	0	0	0	0	0	0	0.000470767	0	0	0	0	0	0	0	0	0	0	0	0	0	0	0	0	0	0	0	0
msp_1633	unclassified	0	4.45867e-05	0	0	0	0	0	0	0	0	0	-2.41245e-05	-3.71463e-05	0	0	0	0	0	0	0	0	0	0	0	0	0	0	0
msp_1634	Slackia piriformis	0.000270298	0.000602536	0	0	-0.000216028	-3.38103e-05	0	0	-0.000322852	0	-1.89214e-05	-0.00012822	-6.3487e-05	-0.000374309	0.000126132	5.71429e-05	-0.000136021	0.000155485	-6.1408e-05	0	0	0	0.000354992	-8.46179e-05	0.000103895	0	0	0
msp_1635	unclassified	-6.29883e-05	2.20869e-05	0	0	0	0	0	0	-4.16396e-05	0	0	0	0	2.1513e-05	0	0	0	0	0	0	0	0	-0.000143438	0.000104154	-6.58166e-05	0	-4.86105e-05	0
msp_1636	unclassified Prevotella	0	0	0	0	0	0	0	0	0	0	0	0	0	0	0	0	0	0	0	0	0	0	0	-6.49091e-05	0	0	0	0
msp_1637	unclassified Clostridiales	-1.11209e-05	-1.83728e-05	0	0	0	0	0	0	0	0	2.18042e-05	0	0.000110043	0	0	0	0	0	-7.6419e-05	0	0	0	0	-9.33369e-06	0	0	0	0
msp_1638	unclassified Firmicutes	0	0	0	0	0	0	0	0	0	0	0	-2.95709e-05	0	0	0	0	0	0	0	0	0	0	0	0	0	0	0	0
msp_1639	Desulfovibrio sp. An276	0	0	0	0	0	3.87686e-05	0	0	0	0	0	0	0	0	-1.48234e-05	0	0	0	0	0	0	0	0	0	0	0	0	0
msp_1640	Alistipes sp. CAG:831	0	0	0	0	0	0	0	0	0	0	-1.32309e-05	0	0	0	0	0	0	0	0	0	0	0	0	0	0	0	0	0
msp_1641	unclassified Lachnospiraceae	-0.000656608	-0.000291221	-0.00429116	-0.00249956	-0.00304179	-0.000265801	0.000665717	-0.0017602	-0.00125109	-0.00177154	-0.00209493	-0.000934737	-0.00116947	-0.000827007	-0.00138288	0.0017228	-0.00125724	-0.00127575	-0.00142451	-0.00208111	-0.000446097	-0.0006875	-0.00232918	-0.00393878	-0.000333367	-0.00253404	-0.00122115	-0.00368296
msp_1643c	Ruminococcus sp. JC304	0.000316544	-0.000299622	0.000169857	0	7.30444e-05	2.01529e-05	0.000678574	0.000277769	0.000121323	0.000233172	-0.000835581	0.000491596	-0.000679203	0.000330042	0.000450457	-0.000244684	-0.000344151	0.000588102	0.000496908	-0.000152938	0	-0.000491898	-9.80107e-05	8.36355e-05	5.45878e-05	-0.000832961	-0.000400204	0.00113185
msp_1644	unclassified Clostridia	0	0	-0.000163112	0	0	0	0	-0.000272959	-0.000113951	0.000145669	-4.69099e-05	5.26807e-05	0.000180035	3.41194e-05	0	0.000201894	0.000113149	0	0	0	0	0	0	4.65235e-05	0	0	0	0.000303232
msp_1646	unclassified Alphaproteobacteria	0	0	0	0	0	0	0	0	0	0	0	0	0	0	0	0	0	0	0	0	0	0	0	0	0	0	0	0
msp_1647	unclassified Coprobacillus	0	0	0	0	0	0	0	0	-2.55509e-05	0	3.31088e-05	0	-3.35539e-05	-5.6639e-05	0.000146559	0	0	-0.000641976	0	0	0	0	0	-8.39938e-05	0	0	0	0
msp_1648	Peptoniphilus senegalensis	1.09774e-05	0	0	0	0	-0.0001452	0	0	0	0	1.94771e-05	0	0	0	-8.3673e-05	0	0	0	0	0	0	0	0	9.0048e-06	0	0	0	0
msp_1649	unclassified Firmicutes	5.98034e-05	-3.55714e-05	0	0	-0.000345577	0	0	-0.000309426	-0.000112929	0.00200684	-0.000315699	-0.000250205	-0.000265741	3.43163e-05	-6.01341e-05	0.00106502	0.00163062	0	0.000575029	0	0	0	0	-1.36082e-05	0	0.00023844	-0.00015068	0.000730523
msp_1650	unclassified	-1.22162e-05	0	0	0	-3.60964e-05	0	0	0	0	0	0	0	0	0	-7.13067e-05	0	3.50577e-05	0	0	0	0	0	0	0	5.10419e-05	5.02851e-05	0	0
msp_1652	unclassified Intestinimonas	-0.000159824	0.00144856	9.92674e-05	0	-0.000124043	0	0	0.000224214	1.46286e-05	0.000201896	0.000341654	0.000100711	0.000432743	4.38193e-05	0	0.000364583	0.000801546	-0.000165484	0.000315728	0	3.88117e-05	0	0.00037734	6.58472e-05	0.000171412	0.000107056	0.000108616	0
msp_1653	unclassified	-8.01371e-05	-1.2914e-05	0	0	0	0	0.000492363	5.7396e-05	2.14242e-05	0	-1.4936e-05	-2.82296e-05	-0.000203093	-3.9322e-05	0	-2.65178e-05	0.000103095	-0.000704184	0	0	0	0	0	-2.18227e-05	0	0	0	0
msp_1654	unclassified Clostridiales	0	0	0	0	0	0	0	0	0	0.000163557	-0.000160708	3.4402e-05	0	0	0	0	7.01908e-05	0	0	0	0	0	0	0	0	0	0	0
msp_1655c	Desulfovibrio desulfuricans	7.83711e-05	-2.93925e-05	0	0	0	4.93225e-05	0	0	-1.19916e-05	0	0	0	0	0	0	0	0	-4.36686e-05	0	0	0	0	0	-1.58155e-05	0	0	0	0
msp_1656	unclassified Lachnospiraceae	1.15713e-05	0	0	0	9.37373e-05	0.00010255	0	0	4.8894e-05	0.000438647	2.2815e-05	0	0.000260281	1.24622e-05	-1.34861e-05	-3.2889e-05	5.69321e-05	-5.28488e-05	0	0	0	0	-6.94818e-05	0	0	0	0	0
msp_1657	unclassified Clostridiales	0	0	-0.000125925	0	0	0	9.92415e-05	0	0	-3.33518e-05	-0.000146678	4.61342e-05	-2.89721e-05	0	0	0	-7.00602e-05	0	0	0	0	0	0	-9.01077e-06	0	0	-6.06062e-05	0
msp_1658	unclassified	0	0	0	0	0	0	0	0	0	0	1.27022e-05	0	0	0	0	0	0	0	0	0	0	0	0	0	0	0	0	0
msp_1659c	unclassified	0	0	0	0	-4.03552e-05	0	0	0	0	0	-0.000154915	0	0	0	0	0	0	0	0	0	0	0	0	0	0	0	0	0
msp_1660	unclassified	0	0	9.09934e-05	0	0	0	0	0	0	0	5.26787e-05	2.19148e-05	0	0.000140201	0	-0.000114282	5.83821e-05	0	-4.17038e-05	0.000571668	0	0	0	0	0	0	0	0
msp_1661	unclassified Clostridiales	0	0	0	0	0	0	0	0	0	0	-1.76434e-05	0	0	0	-1.62769e-05	0	0	0	0	0	0	0	0	0	0	0	0	0
msp_1662	unclassified Eubacterium	0	0	0	0	-0.000212954	0	0	0	0	0	6.72131e-05	0	0	0	0	0	0	0	0	0	0	0	3.41692e-05	1.44739e-05	0	0	0	-0.000124889
msp_1663	unclassified	0	0	0	0	0	0	0	0	0	0	1.44305e-05	0	0	0	0	0	0	0	0	0	0	0	0	0	0	0	0	0
msp_1664	unclassified	0	0	-0.000241007	0	0	0	0	-5.94922e-05	0	0.000166516	-3.12981e-05	3.6607e-05	0	0	0	0	0	0	0	0	0	0	0	0	0	0	0	0
msp_1665	unclassified Firmicutes	0	0	0	0	-0.000107405	0	0	0.000306748	0	0	0	2.77485e-05	-4.75055e-05	0	2.09337e-05	7.01532e-05	-5.35484e-05	0	-4.09721e-05	0	0	0	0	1.33571e-05	0	4.79788e-05	0	0
msp_1666	Mollicutes bacterium Phil14	0	0	0	0	0	0	0	0	0	0	0	0	0	0	0	0	0	0	0	0	0	0	0	0	0	0	0	0
msp_1667	unclassified Clostridiales	0	0.000208938	0	0	-0.000106119	0	0	0	0	0.00049717	-2.18168e-05	-3.99826e-05	0	0	0	0	0	0	4.60328e-05	0	0	0	0.000281309	0	0	0	-6.36043e-05	0
msp_1668	unclassified Clostridiales	0	0	0	0	0	0	0	0	0	0	-0.000258809	0	0	0	0	0	0	0	0	0	0	0	0	0	0	0	0	0
msp_1669	unclassified	0	0	0	0	0	0	0	0	0	0	0	-2.59929e-05	0	-2.64911e-05	0	0	0	0	0	0	0	0	0	0	0	0	0	0
msp_1670	unclassified Firmicutes	0	0	0	0	0	0	0	0	0	0	-4.22374e-05	0	0	0	0	0	0	0	0	0	0	0	0	0	0	0	0	0
msp_1671c	Neglecta timonensis	0.000156731	0.000154139	0	0	0.000252177	0	0	0	-1.52178e-05	0	-2.16249e-05	0	7.01626e-05	0	0	0	0	0.000213959	0	0	0	0	0.00182622	8.40947e-05	0	0	0	0
msp_1672	unclassified	0	0	7.65466e-05	0	8.29489e-05	-4.57729e-05	0	0.000235791	0	0	5.35016e-05	-0.000153664	0	0	-4.48531e-05	9.65768e-05	-5.42928e-05	0.000100775	4.4335e-05	0	0	0	7.59254e-05	0	0.000378767	0.000117875	-6.89509e-05	0
msp_1673	unclassified Clostridiales	0	0.00018708	0	0	-0.000452663	0	0	0.00014007	0	8.62154e-05	0.000487409	5.90006e-05	-3.26045e-05	0	0	-0.000286861	0.000139722	-3.54765e-05	7.83269e-05	0	0	0	0	5.99459e-06	0	-5.99277e-05	0	0
msp_1674	unclassified Clostridiales	0.000817879	-0.000543859	0.00023554	0	0.000310704	-2.31303e-05	0.000519414	0.000501509	-0.000529017	7.14054e-05	-0.0004118	0.000309787	-0.00011581	-0.00123704	-0.000423723	0	3.94058e-05	0.000752345	0.000850561	0.000405724	-0.000148155	0	-0.000151323	-0.000844099	0.00234414	7.1426e-05	0.000228321	0
msp_1675	unclassified Clostridiales	0	0	0	0	0	0	0	0	0	0	0	0	0	0	0	0	0	0	0	0	0	0	0	0	0	0	0	0
msp_1676	unclassified	0	0	0	0	0	0	0	0	0	0	0	-6.56889e-05	-5.55372e-05	0	1.4046e-05	0	0	0	-4.13627e-05	0	0	0	0	0	0	5.17243e-05	0	0
msp_1677	unclassified Clostridium	-0.000285606	0.00053775	0	0	-6.09955e-05	0	-0.000149173	-0.000142001	-0.000166091	0	-2.43729e-05	-0.000287143	0.000142917	-0.000132543	-7.3629e-05	4.48101e-05	4.88545e-05	-4.46861e-05	0	0	0	0	0	-5.57738e-05	0	0	0	-0.000951252
msp_1678	unclassified	-1.03785e-05	0	0	0	0	0	0	0	0	0	0	-5.58317e-05	-3.24956e-05	0	0	0	0	0	0	0	0	0	0	0	0	0	0	0
msp_1679	unclassified Niameybacter	-6.67185e-05	0.000110972	0	0	0.000150671	0	0	0	-2.15523e-05	0.000474462	0	9.05153e-05	0.00011344	3.50835e-05	7.30861e-05	-4.94124e-05	-4.29619e-05	2.38664e-05	0	0	0	0	0	0	0	6.5508e-05	0.000178509	0
msp_1680	unclassified	2.22943e-05	5.98795e-05	0	0	0	0	0	0.000162743	0	5.09498e-05	-7.97916e-05	0	0	0	0	0	0	0	0	0	0	0	0	0	0	0	0	0
msp_1682c	Clostridioides difficile	9.71606e-06	0	0	0	0	0.000714746	0	0	-2.67022e-05	0	0	0	0	0.000213647	9.48671e-05	0	0	0	0	0	0	0	0	7.11579e-05	0	0	0	0
msp_1683	unclassified	0	0	0	0	0	0	0	0	0	0	-2.00968e-05	0	0	0	0	0	0	0	0	0	0	0	0	0	0	0	0	0
msp_1684	Faecalicatena contorta	0.000912119	0.000421647	-0.000898554	0	-0.000611567	-0.000235229	0.000383635	-8.2719e-05	-0.000326293	0.000144446	1.21563e-05	-0.00157729	-0.00437785	0.000217996	0.0010548	0.000325525	-0.000926781	0.000551138	0.000565419	0	-0.000233412	0.0005	0.000314773	0.00194633	-0.000192626	-0.000312898	-0.000647382	0
msp_1686	unclassified Clostridiales	0	0	0	0	0	0	0	0	0	0	0	0	0	0	0	0	0	0	0	0	0	0	0	0	0	0	0	-0.000177597
msp_1687	unclassified	0	0	0	0	0	0	7.60004e-05	4.33871e-05	-1.36867e-05	0	-0.00040747	-5.22643e-05	0	0	0	0	-3.76735e-05	-5.30635e-05	0.00152753	0	0	0	4.70365e-05	0	0	-0.000162911	-6.70671e-05	0
msp_1688	unclassified Ruminococcus	0	0	0	0	0	0	0	0	0	0	0	0	0	1.47504e-05	0	0	0	2.63373e-05	0	0	0	0	-3.60825e-05	-5.74034e-05	0	0	0	0
msp_1689	unclassified Clostridia	4.77275e-05	0.00018588	0	0	4.56831e-05	0	0	0	-2.69316e-05	0	-1.1092e-05	0	0	0	0	0	-5.47566e-05	0	-9.24209e-05	0	0	0	0	-1.02858e-05	0	0	0	0
msp_1690	unclassified	0	0	0	0	0	0	0	0	0	0	-1.57582e-05	0	0	0	0	0	0	0	0	0	0	0	0	0	0	0	0	0
msp_1691	unclassified Phascolarctobacterium	0	0	0	0	0	0	0	0	0	0	0	0	0	0	0	0	0	0	0	0	0	0	0	0	0	0.000250559	6.64826e-05	0
msp_1692	unclassified Muribaculaceae	0	0	0	0	3.41685e-05	0	0	0	0	0	0	0	0	0	0	0	0	0	0	0	0	0	0	-2.06729e-05	0	0	0	0
msp_1693	unclassified	0.000442063	1.62844e-05	0	0	0	0	0	-0.000376779	-1.98767e-05	0	-5.92612e-05	2.71753e-05	-3.64646e-05	0	-1.44462e-05	-4.44288e-05	0	0	0	0	0	0	0	-1.55743e-05	0	0	0	0
msp_1695	unclassified Clostridiales	0	0	0	0	0	0	0	0	0	0	0	0	0	0	0	0	0	0	0	0	0	0	0	0	0	0	0	0
msp_1696c	Desulfovibrio sp. 92-2	6.05356e-05	-2.58673e-05	0	0	0	3.79044e-05	0	0	-8.21264e-06	0.000253636	5.274e-05	-5.1221e-05	0	-1.47155e-05	0	0	0	0.000224808	0	0	0	0	-0.000541589	-0.000110799	0	0	0	0
msp_1697	Enterococcus avium	-0.000148073	0	0.000100256	0	0	0	0	0	7.03525e-05	0	0	-0.000140494	0.000145178	0	0	0.000281891	-0.000119211	4.52949e-05	-8.76733e-05	-6.51629e-05	0	0	0	0.00112547	0	0	0.00013471	0
msp_1698	Lachnoclostridium sp. An14	-0.000160033	0	0	0	0	0	0	0	0	0	-1.21916e-05	-2.77113e-05	0	0	0	0.000192134	8.84228e-05	0	0	0	0	0	8.32849e-05	0	0	0	-9.20148e-05	0
msp_1699	unclassified	0	0	-0.000505446	0	0	0	0	-0.000293151	0	0	-2.03192e-05	-2.35192e-05	0	0	-1.67486e-05	0	0	0	0	0	0	0	0	0	0	0	0	0
msp_1700	unclassified Erysipelatoclostridium	-0.000110619	0	0	0.000465844	-0.000194124	0.000108244	0	0	0.000196449	0	-2.1079e-05	8.35533e-05	0	0.000217467	-0.000138872	0	0.000711816	-3.96998e-05	4.86907e-05	0	0	0	0.000207549	0.000157121	0.000365301	0	0.000118281	0
msp_1701c	Olsenella sp. Marseille-P3256	-1.05631e-05	0	0	0	0	0	0	0	0	0	0	0	0	0	0	0	0	0	0	0	0	0	0	0	0	0	0	0
msp_1702	Streptococcus australis	0.00164088	-0.000238922	-0.000883186	0	0.00026839	-0.000132886	0.000254212	0.00047054	0.0030756	-0.000183996	-0.000850235	-0.0016106	0.000229018	0.00098553	-0.00103822	0.000307407	0.0047662	-0.00142215	0.000704482	0.000228724	0	-0.00210625	-0.000354771	0.000368356	8.96074e-05	0.000107221	0.000593643	0.000175556
msp_1703	unclassified	0	0	0	0	-3.45554e-05	0	0	0	0	0	0	0	0	0	0	-3.21877e-05	-2.09035e-05	0	0	0	0	0	-0.000482471	0	0	0	0.000110443	0
msp_1704c	Enterococcus asini	0	0	0	0	0	8.7644e-05	0	0	-3.09177e-05	0	0	0	0	0	0	0	0	0	0	0	0	0	0	1.97936e-05	0	0	0	0
msp_1705	unclassified	-3.8654e-05	0.000177119	9.69585e-05	0	-0.000176083	0	5.5614e-05	0.000109106	0	0	-1.77934e-05	0.000289392	-3.49635e-05	0	-4.07108e-05	0.000197444	0	-3.38109e-05	-8.69522e-05	0	0	0	0.000107888	9.26942e-06	0	0	0	0
msp_1706	unclassified Sutterella	0	-2.40388e-05	0	0	0	0	0	0	0	0	0	0	0	8.24826e-05	1.85392e-05	0	0	-4.92325e-05	0.000162584	0	0	0	0	0	0	0	0	0
msp_1707	unclassified Firmicutes	0	0	0	0	3.03762e-05	0	0	0	0	0	0	0	4.96597e-05	0	0	0	-2.6853e-05	0	0	0	0	0	0	0	0	0	0	0
msp_1708	unclassified Clostridiales	3.59193e-05	0.000613276	0	0	-0.000150594	0	0	6.49926e-05	0	0	-0.000206496	0	0.000743311	-2.54035e-05	-0.000342189	0	-3.27352e-05	-7.43974e-05	0.000142422	0	0	0	0	0	0	0	0	0
msp_1709	unclassified	0	0	0	0	-6.21963e-05	0	0	4.55758e-05	0	0	-3.01881e-05	0	0	0	0	0	0	0	0	0	0	0	0	0	0	0	-2.63917e-05	0
msp_1710	unclassified	2.21975e-05	0	0	0	-4.54488e-05	0	0	0	0	0	0	0	0	0	0	0	0	0	0	0	0	0	0	0	0	0	0	0
msp_1711	unclassified Eubacterium	-7.394e-06	0	0	0	0	0	0	0	0	0	0	0	0	0	0	0	0	0	0	0	0	0	0	-1.19483e-05	0	0	0	0
msp_1712	unclassified Firmicutes	0	0	0	0	0	0	0	0	0	0	0	0	0	0	-0.000570476	0	0	0	9.0231e-05	0	0	0	0	0	0	0	0	0
msp_1713	unclassified Clostridiales	0	0	0	0	0	0	0	0	0	0.000176363	0	3.53944e-05	0	0	0	5.91629e-05	2.7884e-05	0	0	0	0	0	0.000205023	-2.17737e-05	0	0	0	0
msp_1714	Cloacibacillus evryensis	0.000113362	0.000261947	0	0	-0.000100046	0.000324135	0	0	0.000116673	0.000112962	9.32219e-06	0	0	0.000170824	2.90453e-05	0	4.34701e-05	0.000616753	0	0	0	0	4.25724e-05	-8.15134e-05	0	0.000122897	0	-0.000112403
msp_1715	unclassified Gemmiger	-5.05025e-05	3.96476e-05	0	0	0	0	0.000676371	-0.00165457	3.02025e-05	0.000173613	0.000124126	-2.53442e-05	0	0	6.48822e-05	0	6.95908e-05	0	0	0	0	0	0	0	0	0	0	0
msp_1716	unclassified Roseburia	0	0	0.000187081	0	0	0	0	0	0	0	0	0	0	0	0	0	0	0	0	0	0	0	0	0	0	0	0	0
msp_1717	unclassified Clostridiales	0	0	0	0	0	0	0	-0.000322181	0	-3.99204e-05	0	2.85903e-05	0	0	0	0	0	0	0	0	0	0	0	0	0	0	0	0.000161333
msp_1718	unclassified Blautia	-9.74426e-05	0	0	0	0.000119219	0	0	0	-9.78206e-05	0	3.73939e-05	-5.42109e-05	7.12749e-05	0	1.49637e-05	-6.90396e-05	-8.87213e-05	0	-3.55792e-05	0	0	0	-0.000169952	0	0	0	0	0
msp_1719	unclassified	0	0	0	0	0	0	0	0	0	0	-2.0848e-05	0	4.03489e-05	0	0	0	0	0	0	0	0	0	-8.43663e-05	0	0	0	0	0
msp_1720	unclassified Blautia	0	0	0	0	0	0	0	0	0	-7.11143e-05	-0.000170139	-7.13856e-05	-0.000138199	0	0	0.000119621	0.000105273	0	3.47994e-05	0	0	0	0	0	0	0	0.000191852	0.000226064
msp_1721	unclassified Ruminococcaceae	0	0	0	0	0	0	0	0	0	0	-6.44994e-05	0	0	0	0	5.98719e-05	0	0	0	0	0	0	0	0	0	0	0	0
msp_1723	unclassified Clostridiales	0	0	0	0	-0.000105072	0	0	0.000107673	-2.84915e-05	0.000663885	-0.000578988	-7.73887e-05	0	3.08415e-05	0	0.000629535	0.000809741	0	-0.000103074	0	0	0	0	0	0	0	-0.000132306	0.00132829
msp_1724	Phocea massiliensis	-0.000727879	0.00218721	-0.0016372	0.000328348	0.000751627	-0.00147404	-0.000642089	0	0.000538552	-0.000152154	0.000920511	0.000227858	0.000812693	-0.00200732	0.000697105	0.000821903	-0.00028394	0.00031246	0.000327667	0	-0.00165995	0	0.000408527	-0.0010391	0.000250283	-0.000526596	0.00213036	0.0016178
msp_1725	unclassified Blautia	-2.91392e-05	0	0	0.000555569	0	0	0	0	-9.26595e-06	0	0	0	0	0	0	-3.77915e-05	0	-2.9498e-05	0	0	0	0	-6.73263e-05	0	0	0	0	0
msp_1726	unclassified Clostridiales	0	0	0	0	0	0	0	0	0	0	0	0	0	0	0	0	-3.25691e-05	0	0	0	0	0	0	0	0	0	0	0
msp_1727	unclassified Alistipes	0	0	0	0	0	0	0.000640166	0	0.000251958	0	0	0	0	-1.74291e-05	-3.94866e-05	0	0	7.30389e-05	0	0	0	0	0	0.000110581	0	0	0	0
msp_1728	unclassified Burkholderiales	0	0	0	0	0	0	0.000814887	0	0	0	0	5.22542e-05	0	0	0	0	0	0	0	0	0	0	0	0	0	0	0	0
msp_1729	unclassified Flavonifractor	1.8407e-05	0	0	0	0.000112507	0	0	0.000122302	-7.31852e-05	5.2526e-05	0	7.77719e-05	-5.99267e-05	0	0	0	0	6.09519e-05	0.000109225	0	0	0	-0.000149636	1.62653e-05	9.23291e-05	0	-0.000179452	0
msp_1731	unclassified	0	0	0	0	0	0	0	0	-9.05223e-06	0	0	-9.14197e-05	-3.66013e-05	-1.58796e-05	0	0	0	0	0	0	0	0	0	0	0	0	0	0
msp_1732	unclassified Prevotella	-1.26312e-05	0	0	0	0	0	0	0	0	0	-4.5662e-05	0	0	0	0	0	0	0	0	0	0	0	0	0	0	0	0	0
msp_1733	unclassified Firmicutes	0	0	0	0	0	0	0	0	0	0	-3.70224e-05	0	0	0	0	0	0	0	0	0	0	0	0	0	0	0	0	0
msp_1735	unclassified	0	0	0	0	0	0	0	0	0	0	-1.33987e-05	0	0	0	0	0	0	0	0	0	0	0	0	0	0	0	0	0
msp_1737	Bacteroides stercorirosoris	0	0	0	0	-0.000350932	0	0	0	4.95217e-05	0	-6.47878e-05	-2.58205e-05	-3.72967e-05	4.25521e-05	2.49991e-05	0	0	-0.000117925	0	0	0	0	-6.52591e-05	0.000129149	0	-4.98285e-05	-4.85113e-05	0
msp_1738	unclassified	0	0	0	0	-9.06338e-05	0	0	0	0	0	0	0	8.05332e-05	0	0	0	-3.0694e-05	0	0	0	0	0	0	0	0	0	0	0
msp_1739	unclassified Clostridiales	0	-1.75657e-05	0	0	0	0	0	0	0	0	0	3.08938e-05	0	0	0	0	0	0	0	0	0	0	0	0	0	0	0	0
msp_1740	unclassified Clostridiales	0	0	0	0	0	0	0	0	0	0	-4.28157e-05	0	0	0	-8.17724e-05	0	0	0	0	0	0	0	0	0	0	0	0	0
msp_1741	unclassified Clostridiales	0	0	0	0	0	0	0	0	0	0	-2.90146e-05	0	0	0	0	0	0	0	0	0	0	0	0	0	0	0	0	0
msp_1742	unclassified Firmicutes	0	0	0	0	3.49223e-05	0	0	0	0	0	0	0	0	0	0	0	0	0	0	0	0	0	0	0	0	0	0	-0.000167386
msp_1743	unclassified Firmicutes	0	0	0	0	0	0	0	0	0	0	-0.00010314	0	7.38038e-05	0	0	0	0	0	0	0	0	0	0	0	0	0	0	0
msp_1744	unclassified	0	0	0	0	0	0	0.000114951	0	0	0	-8.5474e-06	0	8.40732e-05	0	2.40129e-05	0.000118481	6.98489e-05	0	0	0	0	0	0	0	0	0	9.42251e-05	0
msp_1745	unclassified Candidatus Gastranaerophilales	0	0	0	0	0	0	0	-6.16333e-05	0	0	0	0	0	0	0	0	0	0	0	0	0	0	0	0	0	0	0	0
msp_1746	unclassified	0	0	0	0	0	0	0	0	0	0	0	0	0	-1.72902e-05	-7.83774e-05	0	0	0	0	0	0	0	0	0	0	0	0	0
msp_1747	Faecalicatena fissicatena	4.59543e-05	6.72626e-05	0	0	0.0001514	-0.00036596	0	0	0.00022102	0	-8.28384e-05	1.88058e-05	-3.21911e-05	1.76296e-05	1.8074e-05	-0.000216925	-0.000251629	3.83926e-05	9.82732e-05	0	0	0.000640799	5.03835e-05	-0.000138387	0	0	9.68799e-05	0.000460471
msp_1748	Streptococcus gordonii	0.00075284	-0.000309383	0	0.000700855	-0.000268793	0.000240923	-0.000114204	0.000522149	0.00132752	0.000935973	0.000145042	-0.00038873	-0.000290372	0.00635465	-0.000937998	-0.000572527	-0.00062213	0.00118415	-0.000356458	0	0	0	6.5349e-05	0.00258096	6.20899e-05	5.6406e-05	0.000360631	-0.000531429
msp_1749	unclassified	0	0	0	0	0	0	0	0	0	0	0	0	0	0	0	0	0	0	0	0	0	0	0	0	0	0	0	0
msp_1750	unclassified	0	0	0	0	0	0	0	0	0	0	0	0	0	0	-2.59369e-05	0	0	0	0	0	0	0	0	0	0	0	0	-0.00016
msp_1751	unclassified Bacteroides	0	0	0	0	0	0	0	0	0	0	0	0	0	0	0	0	0	-0.000164752	0	0	0	0	3.69993e-05	0	0	0	0	0
msp_1754	Raoultella ornithinolytica	0.000360463	0.000207005	0	0	-0.000122257	-5.50561e-05	0.000326596	0	-2.44013e-05	0	1.54292e-05	3.20327e-05	0.000204648	0.000296576	0.000425373	-3.76646e-05	-0.000159577	3.1247e-05	-8.14588e-05	-0.000138085	-0.000413408	0	0	-4.53697e-05	0	0	0.000228163	0
msp_1755	unclassified	0	0	0	0	0	0	0	-0.000171229	-5.20421e-05	0	0	0	0	0	0	0	0	0	0	0	0	0	0	1.63761e-05	0	0	0	0
msp_1757	unclassified	0	0	0	0	0	0	0	0	0	0	0	0	0	0	0	0	0	0	0	0	0	0	0	0	0	0	0	0
msp_1759	unclassified Bacteroidales	-4.52611e-05	0	0	0	0	0	0.000135185	-6.24587e-05	-2.33833e-05	-7.83381e-05	0	0	0	0	0	0	0	0	0	0	-0.000223699	0	0	-1.35197e-05	-0.000134689	0	-6.08443e-05	0
msp_1760	unclassified	0	0	0	0	0	0	0	0	0	0	-4.18948e-05	0	0	0	0	0	0	0	0	0	0	0	0	0	0	0	0	0
msp_1763	unclassified Clostridiales	0	-2.284e-05	0	0	-9.46801e-05	0	0	-0.00011342	0	0	-7.99271e-05	-6.01206e-05	0.00068736	0	0	0	0	0	5.71108e-05	0	0	0	0	0	0	0	0	0.000169524
msp_1766	Enterobacter ludwigii	-0.000375817	0.000535019	0	0	-4.00233e-05	0	0.000378718	0	-6.88914e-05	-4.07327e-05	-6.98469e-05	0	0.000131373	9.60381e-05	0.00158477	0	0.000177771	0	0	0	0	0	0	-2.63911e-05	-0.000177051	0	0.00010926	0
msp_1767	unclassified	-1.11965e-05	3.55086e-05	0	0	0	0	0	0	0	0	-0.000199848	0	0	0	0	0	0	0	0	0	0	0	-8.82688e-05	0	0	-0.000103874	-5.70065e-05	0
msp_1768	unclassified	0	3.47826e-05	0	0	0	0	0	0	0	0	-4.6307e-05	0	0.000109187	0	0	-3.28484e-05	0	0	0	0	0	0	0	0	0	0	0	0
msp_1769	unclassified	0	0	0	0	0	0	0	0	0	0	0	0	0.000141555	0	0	0	0	0	0	0	0	0	0	-1.68499e-05	0	0	0	0
msp_1770	unclassified Achromobacter	0	0	0	0	0	0	0	0	0	0	0	0	0	0	0	0	0	0	0	0	0	0	0	0	0	0	0	0
msp_1771	unclassified	0	0	0	0	0	0	0	0	0	0	-1.65416e-05	0	0	0	0	0	0	0	0	0	0	0	0	0	0	0	0	0
msp_1772c	Clostridium neonatale	-7.75742e-05	0	0	0	0	3.86391e-05	0	0	-2.89594e-05	0	0	0	0	0	-2.98178e-05	0	0	0	0	0	0	0	0	4.48682e-05	0	9.25912e-05	0	0
msp_1773	Lactobacillus oris	-2.87847e-05	0.000208334	0	0	-4.41391e-05	5.53054e-05	0	0	3.76968e-05	0.000168538	0	0.000166958	0.000166354	0.000438165	3.95174e-05	0	9.51626e-05	0	0	0	0	0	0	0.000153017	0	-0.000126032	-3.99959e-05	0
msp_1774	unclassified	0	0	0	0	0	0	0	0	0	0.00102028	0	0	0	0	0	0	0	0	0	0	0	0	0	0	0	0	0	0
msp_1775	unclassified Clostridiales	0	0	0	0	0	0	0	0	0	-0.00024327	0	0	0	5.80121e-05	0	0	0	0	0	0	0	0	0.000132858	0	-7.01497e-05	5.88711e-05	-0.000101057	-0.0006244
msp_1776c	Anaerofilum sp. An201	-0.000163992	0.000168364	0	0	0.000299908	0	0	0	1.12238e-05	-3.95838e-05	5.94925e-05	-0.000133513	0.000205352	0	-1.64015e-05	0	-0.000215683	5.34838e-05	-6.10058e-05	0	0	0	0	0.000153356	0	5.13281e-05	0.000111095	-0.00022
msp_1777	unclassified Lachnospiraceae	0	0	0	0	-0.000315611	0	0	0	0	0	-1.62361e-05	0	0	0	0	0	0	0	3.73722e-05	0	0	0	-0.000197193	0	0	0	0	0
msp_1778	unclassified Clostridium	0	0	0	0	0	0	0	0	0	0	0.000140722	0	0	0	0	0	0	0	0	0	0	0	0	0	0	0	0	0
msp_1779c	Blastocystis sp. subtype 9	0	0	0	-0.000184046	0	0	0	0	0	0	0	0	0	0	0	0	0	0	0	0	0	0	0	0	0	0	0	0
msp_1780c	Clostridium jeddahense	0	0	0	0	0	0	0	0	4.74076e-05	0	0	0	0	0	0	0	0	0	0	0	0	0	0	2.63954e-05	0	0	0	0
msp_1782	Prevotella melaninogenica	0.000181593	1.89589e-05	0	0	0	0	0	0	0	0	0	0	0	0.000305183	0	0	0	0	0	0	0	0	0	3.7497e-05	0	0	0	0
msp_1783	Fusobacterium periodonticum	0.000119685	-3.44329e-05	0	0	-9.74147e-05	7.23293e-05	0	0	3.34367e-05	0.000618493	0	2.35251e-05	0	0.000160611	-2.37946e-05	9.64336e-05	0	0.00048806	0	0	0	0	0	4.34632e-05	0	0	0	0
msp_1784	Prevotella jejuni	-0.000108845	0.000135243	0	0	0	0	0	0	0	0	0	0	0	1.349e-05	0	3.46684e-05	0	0	0	0	0	0	0	0	0	0	0	0
msp_1785	Haemophilus sp. CCUG 66565	0.000411086	0	0	0.000543296	0	0	0	0	0	0	0	0	0	0.000910092	0	0	0	0	0.000168377	0	0	0	0	5.66705e-05	0	0	0	0
msp_1786	unclassified Leptotrichia	-6.83938e-05	0	0	0	7.83492e-05	0	0	0	0	0	0	0	0	-3.13618e-05	0	0	0	0	0	0	0	0	0	0	0	0	0	0
msp_1787	Prevotella salivae	4.22154e-05	-9.36853e-06	0	0	0	0	0	0	0	0	0	0	0	2.31644e-05	0	0	0	0	0	0	0	0	0	0	0	0	0	0
msp_1788	Lachnoanaerobaculum saburreum	0.000348769	0	0	0	0	3.39941e-05	0	0	0	0	-3.62611e-05	0	7.48708e-05	6.25608e-05	0	0	0.00025812	0	0	0	0	0	0	9.52113e-06	0	0	0	0
msp_1789	Alloprevotella tannerae	0.000393676	0	0	0	0	0	0	0	0	0	0	0	0	0.000287499	0	0	0	0	0.000155386	0	0	0	0	-9.95746e-06	0	0	0.000260346	0
msp_1790	Fusobacterium nucleatum subsp. polymorphum	0.000868546	1.02624e-05	0	0	4.82816e-05	0.000134788	0	0	1.03237e-05	0.000172956	0	0.000127529	0	0.00032271	0	5.7082e-05	3.33537e-05	0.000550084	0	0	0	0	0	-0.000122681	0	0	0.000307975	0
msp_1793	Prevotella denticola	0	0	0	0	0	0	0	0	0	0	0	0	0	-5.38933e-05	0	2.8211e-05	0	0	0	0	0	0	0	0	0	0	0	0
msp_1794	Haemophilus paraphrohaemolyticus	3.52248e-05	0	0	0	0	-4.62274e-05	-5.37852e-05	0	8.68015e-05	0	0	0	0	9.13581e-05	-1.51031e-05	0	0	-0.000120616	0	0	0	0	0	-5.09197e-05	5.51486e-05	0	0	0
msp_1799	unclassified Veillonella	-0.00015205	0.000847556	0	0	0	-8.63518e-05	0	-0.000500145	5.14265e-05	0	-5.64729e-05	0	0	0.000643914	4.2644e-05	-8.02515e-05	3.90895e-05	7.22875e-05	0	0	0	0	0	9.80728e-05	0	0	0	0
msp_1801	Haemophilus parahaemolyticus	4.33512e-05	0.000447249	0	0	0	0	0	0	-0.000168308	0	0	0	0	0.00336137	0	0	0	3.60218e-05	0	0	0	0	0	7.43582e-05	0	0.000236104	0	0
msp_1802	Haemophilus sputorum	0.000147625	0	0	0	0	3.03614e-05	0	0	-6.7935e-05	0	-6.28771e-05	0	0	-3.78254e-05	0	0	0	-0.000122572	0	0	0	0	0	-1.90824e-05	0	0	0	0
msp_1805	Lactobacillus gasseri 1	2.35048e-05	0	0	0	-3.84974e-05	0	0	-0.000114542	0	0.0001149	2.29511e-05	-0.000368404	-0.000204137	0	6.57956e-05	-0.00022209	-0.000601337	-5.59986e-05	0	0	0	0	3.42921e-05	7.04061e-05	0	-0.000110439	7.98126e-05	0
msp_1808	Prevotella veroralis	0	0	0	0	0	0	0	0	0	0	0	0	0	0	0	0	0	0	0	0	0	0	0	0	0	0	0	0
msp_1810	Streptococcus salivarius 2	-8.88324e-05	0.000667591	0	0	0.000365543	0	0	-0.000287564	0	0.00025569	-5.36433e-05	-6.54029e-05	0	1.68377e-05	0	0.0003008	-0.00157909	0	0	0	0	0	0.000288538	-1.45599e-05	0	0	0	0
msp_1814	unclassified Parabacteroides	0.000125243	4.082e-05	0.000492868	0	5.78934e-05	0	-0.000231062	0	0.000206691	0	-1.43712e-05	0.000117319	-0.000522017	-0.000403313	-4.76631e-05	0.000117676	0	-0.000660274	0	0	0.000150912	0	0	0.000503145	-0.000101304	0	0.000126913	-0.000346897
msp_1815	Enterobacter mori	2.99832e-05	0.000204881	0	0	0	0	0.000132602	0	-3.8379e-05	0	0	0	0	-0.000125794	0.00116804	0	0	0	0	0	-0.000270032	0	0	-2.60246e-05	0	0	0	0
msp_1816	Citrobacter freundii	-4.1487e-05	0.000167839	0	0	0	0	0.000257707	6.82149e-05	-8.49764e-05	0	-0.000127948	-0.00016359	-0.000149647	0.000135729	0.00136319	0.00202906	0	2.71793e-05	-9.11001e-05	0	0.00042142	0.00075	0	-0.000122008	0	0.000152127	0.00110606	0
msp_1817	unclassified	0	0	0	0	0	0	0	0	0	5.27031e-05	-1.05489e-05	0	0	0	0	0	3.74423e-05	0	0	0	0	0	0	1.47841e-05	0	0	4.29155e-05	0
msp_1818	unclassified Saccharopolyspora	0	0	0	0	0	0	0	0	0	0	0	0	0	0	0	0	0	0	0	0	0	0	0	0	0	0	0	0
msp_1819	unclassified Clostridiales	0	0	0	0	0	0	0	0	0	0	-1.33479e-05	0	0	0	0	0	0	0	0	0	0	0	0	0	0	0	0	0
msp_1820	Clostridium sp. CL-2	0.000214119	5.575e-05	0	0	-5.18503e-05	0	0	0	3.97282e-05	0	-2.55077e-05	-0.000100387	0.000698921	6.3427e-05	0.000133313	-3.44855e-05	0	0	0	0	0	0	0	-3.84892e-05	0	0	0	0
msp_1821	unclassified Bacteroides	0	0	0	0	0	0	0	0	0	0	0	0	0	0	0	0	-1.86993e-05	0	0	0	0	0	0	0	0	0	0	0
msp_1822	unclassified Selenomonas	0	0	0	0	0	0	0	0	0	0	0	0	0	0	0	0	0	0	0	0	0	0	0	0	0	0	0	0
msp_1823	unclassified Burkholderiales	4.44203e-05	4.50376e-05	0	0	0	0	0	0	3.12285e-05	0	0	0	0	5.67761e-05	-6.6022e-05	0	0	0	0	0	0	-0.00173611	0	-2.30833e-05	-0.000959481	0	0	0
msp_1824	unclassified Prevotella	0	0	0	0	0	0	0	0	0	0	0	0	0	0	0	0	0	0	0	0	0	0	0	0	0	0	0	0
msp_1826	unclassified Bacteroides	0	2.24471e-05	-8.7253e-05	0.000493395	-4.80272e-05	0	0	0	0	0.000337805	-0.000106445	0	0	0	0	0	3.77416e-05	0	0	0	0	0	0	0	0	0	0	0
msp_1827	unclassified Alistipes	0	0	0	0	0	0	0	0	0	0	0	-1.66596e-05	0	0	0	0	0	0	0	0	0	0	0	0	0	0	0	0
msp_1828	unclassified Bacteroidales	2.8841e-05	0	0	0	0	0	0	0	0	0	0	0	0	0	0	0	0	0	0	0	0	0	0	4.02564e-05	0	0	0	0
msp_1829	unclassified	0	0	0	0	0	0	0	0	0	5.47843e-05	-2.42908e-05	-3.27601e-05	0	0	-1.93347e-05	0	0	0	0	0	0	0	0	0	0	0	0	0
msp_1830	unclassified Bacteroidales	0	0	0	0	-3.33076e-05	0	0	0.000121866	-1.74216e-05	0	0	0	0	0	0	0	0	0	0	0	0	0	0	0	0	0	0	0
msp_1831	unclassified Eubacterium	0	0	0	0	3.87201e-05	0	0	0	0	0	0	0	0	0	0	0	0	0	0	0	0	0	0	0	0	0	0	0
msp_1833	unclassified Ruminococcus	1.05002e-05	0	0	0	0	0	-5.19984e-05	0	-9.10877e-05	0	0	0	0	-1.6324e-05	-3.28435e-05	0	0	0	0	0	0	0	0	7.61308e-05	-7.68948e-05	0	0	0
msp_1834	unclassified Prevotellaceae	0	0	0	0	0	0	0	0	0	0	0	0	0	0	0	0	0	0	0	0	0	0	0	0	0	0	0	0
msp_1835	unclassified Candidatus Gastranaerophilales	0	0	0	0	0	0	0	0	0	0	0	0	0	0	0	0	0	0	0	0	0	0	0	0	0	0	0	0
msp_1836	unclassified Muribaculaceae	0	0	0	0	0	0	0	0	0	0	0	0	0	0	0	0	0	0	0	0	0	0	0	0	0	0	0	0
msp_1837	unclassified Alistipes	0	0	0	0	0	0	0	0	3.35679e-05	0	0	0	0	0	0	0	0	0	8.12979e-05	0	0	0	-9.0431e-05	0	0	0	0	0
msp_1838	unclassified Fusobacterium	0	0.00038268	0	0	0	0	0.000119741	0	0	0	0	0	0	-8.39985e-05	0	0	0	0	0	0	0	0	0	-2.91753e-05	0	0	0	0
msp_1839	unclassified Bacteroidales	0	0	0	0	0	0	6.79204e-05	0	0	0	0	0	0	0	0	0	0	-2.43871e-05	0	0	-0.000414246	0	0	0	0	0	0	0
msp_1840	unclassified Clostridiales	0	0	0	0	0	0	0	0	0	-0.000128091	0	0	0	0	0	0	0	0	0	0	0	0	0	0	0	-3.59547e-05	0	0
msp_1841	unclassified Alistipes	0	0	0	0	0	2.34532e-05	0	0	0	0	0	0	-9.40509e-05	0	0	0	0	0	0	0	0	0	0	0	0	-5.72649e-05	-3.15074e-05	0
msp_1842	unclassified Bacteroides	0	0	0	0	0	0	0	0	0	0	0	0	3.21157e-05	0	0	0	0	0	0	0	0	0	0	0	0	0	0	0
msp_1843	unclassified Bacteroides	0	0	0	0	3.0404e-05	0	0	0	0	0	0	0	0	0	0	0	0	0	0	0	0	0	0	0	0	0	0	0
msp_1844	unclassified Phascolarctobacterium	0	0	0	0	0	0	0	0	0	0	0	0	0	0	0	0	0	0	0	0	0	0	0	0	0	0	0	0
msp_1845	unclassified	0	0	0	0	0	0	0	0	1.04548e-05	0	0	0	0	0	0	-5.66612e-05	0	-0.0002053	0	0	0	0	3.45514e-05	0	0	0	0	0
msp_1846	unclassified Faecalibacterium	0	0	0	0	0	-3.91313e-05	0	0	-0.000377186	0.000107618	-2.62617e-05	0	0	-0.000115713	-0.000141257	0	0	-3.02734e-05	0	0	0	0	0	-7.09615e-05	0	0	0	0
msp_1847	unclassified	0	0	-0.0005011	0	0	0	0	0	0	0.00011122	2.54517e-05	0	0	4.77018e-05	0	0	0	0	0	0	0	0	0	0	0	0	0	0
msp_1848	unclassified Desulfovibrio	-1.19445e-05	0	0	0	0	0	0	0	-6.56999e-05	0	0	0	0	0	-1.56211e-05	0	0	0.000100282	0	0	9.55172e-05	0	0	-0.000229008	5.00949e-05	0	0	0
msp_1849	unclassified	0	0	0	0	0	0	0	0	0	0	0	0	0	2.14149e-05	0	0	0	0	0	0	0	0	0	0	0.000175942	0	0	0
msp_1850	unclassified Firmicutes	0	8.76478e-05	0	0	0	0	0	-9.86277e-05	-2.30567e-05	0.000148538	0	-4.00662e-05	0	0	1.72306e-05	0	-2.92129e-05	-8.86501e-05	0	0	0	0	0.000132181	0	0	-7.41915e-05	0	0.00105908
msp_1851	unclassified Blautia	0	0	0	0	0	0	0	0	0	0.000444431	1.47173e-05	0	0	0	0	0	0	0	0	0	0	0	0	0	0	0	0	0
msp_1852	unclassified Firmicutes	0	0	0	0	0	0	0	0	0	0	0	0	0	0	0	0	0	0	0	0	0	0	0	0	0	0	0	0
msp_1853	unclassified Elusimicrobium	0	0	0	0	0	0	0	0	0	0	0	0	0	-2.6492e-05	0	0	0	0	0	0	0	0	0	0	8.37234e-05	0	0	0
msp_1854	unclassified	-0.000857709	0.000698988	-0.000478939	0	-0.000429287	0.000198223	0.000896806	0.000561743	0.000271298	9.52118e-05	-0.000278689	-0.000401617	0.000378872	-0.000132997	-0.000410306	0.000685872	0.000113817	-0.000230806	0.000182866	9.28363e-05	5.21863e-05	0.002	-0.000249455	0.000633427	0.000161793	-0.000124111	-0.0010445	0
msp_1855	unclassified Clostridiales	0	0	0	0	0	0	0	0.000170274	0	0	-9.68033e-05	0	0	0	0	-2.43614e-05	0	0	0	0	0	0	0	0	0	0	0	0
msp_1856	unclassified Bacillales	0	0	0	0	0	0	0	0	0	0	0	0	0	0	0	-4.92247e-05	0	0	0	0	0	0	-6.37822e-05	0	0	0	0	0
msp_1857	unclassified	0	0	0	0	0	0	0	0	0	-4.36922e-05	0	0	0	0	0	0	0	0	0	0	0	0	0	0	0	0	0	0
msp_1858	unclassified Clostridiales	0	0	0	0	0	0	0	0	0	0	7.20641e-05	0	0	0	0	0	0	0	0	0	0	0	0	0	0	0	0	0
msp_1859	unclassified Alistipes	0	0	0	0	0.000185456	0	0	0	0	0	0	0	0	0	0	-5.33469e-05	0	-2.99873e-05	0	0	0	0	0	0	0	0	0	0
msp_1860	unclassified Clostridiales	0	0	0	0	0	0	0	0	0	0	0	0	0	0	0	0	0	0	0	0	0	0	0	0	0	0	0	0
msp_1861	unclassified Fusobacterium	-2.94741e-05	0.000249392	0	0	0	0	0.000182488	0	-8.44084e-05	0	0	0	0	-6.77852e-05	-6.40329e-05	0	0	0	0	0	0	0	0	3.55323e-05	0	0	0	0
msp_1862	unclassified	0	0	0	0	3.52233e-05	0	0	7.17037e-05	1.1632e-05	0	6.59369e-05	0	0	6.18316e-05	-4.33923e-05	0	0	0	6.6111e-05	0	0	0	-3.77968e-05	0	0	0	0	0
msp_1863	unclassified Clostridiales	-1.97076e-05	0	0	0	0	0	0	0	-2.1699e-05	0	0	0	0	0	0	0	0	0	0	0	0	0	0	0	0	0	-9.22379e-05	0
msp_1864	unclassified Lachnospiraceae	-1.17322e-05	0	-0.000245631	0	3.46869e-05	0	0	0	0	0	0	0	0	0	0	0	0	0	0	0	0	0	0	0	0	0.00023011	0	0
msp_1865	unclassified Lachnospiraceae	0	0	0	0	0	0	0	0	0	0	0	0	0	0	0	0	0	0	0	0	0	0	0	0	0	0	0	0
msp_1866	unclassified Clostridium	-0.000133085	0	0	0	3.51679e-05	8.47065e-05	-5.19426e-05	0	-0.00012864	0	0	-3.54462e-05	4.44287e-05	-6.666e-05	3.29096e-05	7.81828e-05	-0.000115657	0.00011052	-0.000246631	0	0	0	0	4.37857e-05	0	0	-0.000126388	0
msp_1867	unclassified Bacilli	0	0	0	0	0	0	0	0	0	0	0	4.19295e-05	0	0	0	0	0	0	0	0	0	0	0	0	0	0	0	0
msp_1868	unclassified Clostridiales	0	0	0	0	-2.85251e-05	0	0	0	0	0	0	0	3.82326e-05	0	0	0	0	0	0	0	0	0	0	0	0	0	0	0
msp_1869	unclassified Holdemanella	0	0	0	0	0.000128533	0	0	-0.000127016	0	0	0	-4.6982e-05	0	0	0	0	0	0	0	0	0	0	0	0	0	0	0	0
msp_1870	unclassified Odoribacteraceae	3.72083e-05	0	0	0	0	0	0	0	-1.09221e-05	0.000104188	-4.47144e-05	0	0.000277896	0	0	0	0	0	0.000125819	0	0	0	0	0	0	0	0	0
msp_1871	unclassified	0	9.86906e-05	0	0	-0.000148672	0	0	0	0	0	-7.01869e-05	-9.19737e-05	0	0	6.88953e-05	0	0	0	0	0	0	0	0	0	0	0	0	0
msp_1873	unclassified Clostridiales	0	0	0	0	0.000104116	0	0	0	-1.09258e-05	-5.45505e-05	0	0	0	0	1.7281e-05	0	-0.000129512	-0.000255193	0	0	0	0	0	-4.42952e-05	0	0	0	0
msp_1874	unclassified Lachnospiraceae	3.4565e-05	0	0	0	0	0	0	6.75139e-05	-9.32632e-06	0	0	0	0	0	0	0	0	-2.95709e-05	0	0	0	0	0	0	0	0	0	0
msp_1875	unclassified Clostridiales	9.38147e-06	3.94227e-05	0	0	-3.81242e-05	0	0	0	0	0	3.36328e-05	-6.69963e-05	0	0	0	0	0	0	0	0	0	0	0	0	0	-9.1114e-05	-5.66453e-05	0
msp_1876	unclassified	0	0	8.35165e-05	0	0	0	0	0	0	0	0	0	0	0	0	0	0	0	0	0	0	0	0	0	0	0	0	0
msp_1877	unclassified Clostridiales	9.78987e-06	0	-0.000173184	0	0	0	0	8.82466e-05	0	0	-0.000565888	0.000261394	0	0	0	0	4.87359e-05	0	-0.00012663	0	0	0	3.19308e-05	0	0	0	2.08375e-05	0.000151111
msp_1878	unclassified Bacteroides	0	0	0	0	0	0	0	-0.00015502	0	0	2.41868e-05	0	0	0	0	0	0	0	0	0	0	0	0	0	0	0	0	0
msp_1879	unclassified Bacteroides	0	0	0	0	0	0	0	0	0	0	0	0	0	0	0	0	0	0	0	0	0	0	3.40341e-05	0	0	0	0	0
msp_1880	unclassified Phascolarctobacterium	0	0	0	0	0	0	0	0	-5.79397e-05	0	1.53542e-05	0	0	-2.03081e-05	0	0	0	0	0	0	0	0	0	0	0	0	0	0
msp_1881	unclassified	-2.78586e-05	0	0.000136695	0	-4.77581e-05	0	-0.000153779	0	0.000161329	0	5.80877e-05	0.000108189	0	4.66037e-05	-0.000439589	0	0	-8.00223e-05	-6.64373e-05	8.01877e-05	0.000146241	0	0	-0.000136275	-0.000201657	-4.4018e-05	0	0
msp_1882	unclassified Megamonas	0	0	0	0	0	0	0	0	0	0	0	0	-2.8762e-05	0	0	0	0	0	0	0	0	0	0	0	0	0	0	0
msp_1883	Aeromonas caviae	0	2.33243e-05	0	0	0	0	0.000247074	0	0	0	0	0	0	0	0	0	0	0	0	0	-0.000126483	0	0	0	0	0	0	0
msp_1884	unclassified	0	0.000119754	0	0	3.92508e-05	0	0	0.000284676	9.58064e-06	0	-0.00142772	2.5644e-05	9.0114e-05	0	-6.78692e-05	3.18987e-05	8.14337e-05	0	0.000125885	0.000209653	0	0	-3.90469e-05	0	0	0	0	0
msp_1885	unclassified Prevotella	1.19478e-05	0	0	0	0	0	0	0	-1.18274e-05	-4.40867e-05	-3.03464e-05	0	0	0	0	0	0	0	0	0	0	0	0	0	0	0	0	0
msp_1886	unclassified Olsenella	0	0	0	0	0	0	0	0	-0.000101371	0	0	0	0	0	0	0	0	0	0	0	0	0	0	0	0	0	0	0
msp_1887	unclassified Sutterella	0	0	0	0	-3.50416e-05	0	0	0	0	0	2.61868e-05	0	0	0	0	0	0	0	0	0	0	0	0	0	0	0	0	0
msp_1888	unclassified Bacteria	0	0	0	0	0	0	0	0	0	0	0	0	0	0	0	0	0	0	0	0	0	0	0	0	0	0	0	0
msp_1889	unclassified	0	0	0	0	0	0	0	0	0	0	0	0	0	0	0	0	0	0	0	0	0	0	0	0	0	0	0	0
msp_1890	unclassified Firmicutes	0	0	0	0	0	0	0	0	0	0	0	0	0	0	0	0	0	0	0	0	0	0	0	0	0	-0.000166048	0	0
msp_1891	unclassified Blautia	0	0	0	0	0	0	0.000516811	0	0	0	0	0	0	0	0	0	9.77566e-05	0	0	0	0	0	0	0	0	0	0	0
msp_1892	unclassified	0	0	0	0.000221866	0	0	0	0	-2.81864e-05	0	0	-0.000927987	-5.39188e-05	0.000116872	-4.72025e-05	-0.000166265	-0.00010299	0	-8.14989e-05	0	0	0	0	3.20094e-05	0	0	0	0
msp_1893	unclassified Clostridiales	0	0	0	0	0	0	0	0	-3.70435e-05	4.60785e-05	-4.47694e-05	0	0	0	0	0	0	0	0	0	0	0	3.35399e-05	0	0	0	0	0
msp_1894	unclassified	0	0	0	0	0	0	0	0	0	7.92059e-05	1.41109e-05	0	0	0	0	0	0	0	0	0	0	0	0	0	0	0	0	0
msp_1895	unclassified Bacteroidales	0	0	0	0	0	0	0	0	0	0	0	0	0	0	0	0	0	0	0	0	0	0	-5.33902e-05	9.91316e-06	0	0	0	0
msp_1896	unclassified	4.74863e-05	0.000161736	0	0	0	0	-5.90608e-05	0	3.93101e-05	0	0	0	-4.73078e-05	0	2.43042e-05	0	0	5.60544e-05	0	0	0	0	0	-4.19921e-05	0.0011864	3.8867e-05	0	-0.000150069
[truncated: 156 more rows]

## Sheet: README
Supplemental Table S8. Mean directional SHAP scores for each cohort with matched controls.
