# Supplementary material for: Global compositional and functional states of the human gut microbiome in health and disease
Source: Genome Res. 2024 Jun;34(6):967–78. doi: 10.1101/gr.278637.123 (PMC11293553; doi:10.1101/gr.278637.123)
Supplement: Supplement 9 [file Supplemental_Table_S9.xlsx]

## Sheet: Table S9
Supplemental Table S9. Statistical results of PERMANOVA of different batches of healthy samples of same country origins
Country	Total samples	Df	F	P-value
China (CHN)	730	8	-55.473	0.874
Denmark (DNK)	335	1	12.137	0.488
UK (GBR)	259	1	823.13	0.221
Germany (GER)	93	2	-10.455	0.801
Italy (ITA)	63	1	67.67	0.211
Sweden (SWE)	58	1	-12.988	0.463
US (USA)	666	5	280.75	0.32
