# Supplementary material for: Global compositional and functional states of the human gut microbiome in health and disease
Source: Genome Res. 2024 Jun;34(6):967–78. doi: 10.1101/gr.278637.123 (PMC11293553; doi:10.1101/gr.278637.123)
Supplement: Supplement 10 [file Supplemental_Table_S10.xlsx]

## Sheet: Table S10
Supplemental Table S10. Statistical results of PERMANOVA of confounder effects on healthy samples in different geographical datasets
Country	F (study)	F (age)	F (BMI)	F (gender)	P (study)	P (age)	P (BMI)	P (gender)
China (CHN)	-48.386	-528.277	-89.927	-189.513	0.576	0.879	0.616	0.484
UK (GBR)	-4.0674	-12.0653	-28.457	195.957	0.913	0.609	0.877	0.067
Germany (GER)	71.483	30.494	-100.94	17.241	0.069	0.125	0.917	0.306
Sweden (SWE)	-10.2115	-1.0313	-1.6274	-0.3422	0.539	0.399	0.417	0.532
US (USA)	5.468	-149.896	6.2802	-140.506	0.33	0.727	0.387	0.54
