# Supplementary material for: Global compositional and functional states of the human gut microbiome in health and disease
Source: Genome Res. 2024 Jun;34(6):967–78. doi: 10.1101/gr.278637.123 (PMC11293553; doi:10.1101/gr.278637.123)
Supplement: Supplement 11 [file Supplemental_Table_S11.xlsx]

## Sheet: Table S11
feature	coef	stderr	pval	k	tau2	stderr.tau2	pval.tau2	I2	H2	weight_AUT:PRJEB7774	weight_CHN:PRJEB10878	weight_CHN:PRJEB15371	weight_CHN:PRJEB18755	weight_CHN:PRJEB21528	weight_CHN:PRJEB6337	weight_CHN:PRJEB6997	weight_CHN:PRJNA356225	weight_CHN:PRJNA422434	weight_CHN:PRJNA431482	weight_DNK:PRJEB4336	weight_ESP:PRJEB2054	weight_FIN:SRP006764	weight_FRA:PRJEB6070	weight_GER:PRJEB17784	weight_GER:PRJEB27928	weight_GER:PRJEB6070	weight_ITA:PRJNA447983	weight_JPN:PRJDB4176	weight_LUX:PRJNA289586	weight_SWE:PRJEB1786	weight_SWE:PRJNA177201	weight_USA:PRJEB12449	weight_USA:PRJNA379741	pval.bonf	qval.fdr	species	genus	family	order	class	phylum	superkingdom
msp_0001	-0.00012855	0.000212375	0.54498	21	1.97259e-07	2.22794e-07	0.168899	28.58	1.40017	1.76492	3.59983	14.3391	1.8036	5.81039	9.67596	5.81547	NA	6.91773	1.50318	4.33707	0.325163	NA	5.30803	0.684094	0.591431	0.233013	1.73055	18.8078	0.102277	NA	1.24855	4.49493	10.9069	1	0.891291	Blastocystis sp. subtype 3_msp_0001	Blastocystis	unclassified Eukaryota	unclassified Eukaryota	unclassified Eukaryota	unclassified Eukaryota	Eukaryota
msp_0002	-0.00016541	0.000144634	0.252772	16	4.58611e-09	8.45035e-08	0.5123	1.24028	1.01256	2.08978	NA	NA	NA	3.83209	26.5305	2.37588	NA	6.38728	24.7384	0.764089	NA	NA	12.426	0.0787063	0.124199	NA	0.514396	9.96683	0.0400966	0.88259	NA	2.53221	6.71696	1	0.707423	Blastocystis sp. subtype 1_msp_0002	Blastocystis	unclassified Eukaryota	unclassified Eukaryota	unclassified Eukaryota	unclassified Eukaryota	Eukaryota
msp_0003	0.000156972	0.00259004	0.951673	23	5.73702e-05	4.15392e-05	0.0109704	43.345	1.76507	7.65008	5.64072	2.75459	2.40795	5.38468	6.06358	6.50438	NA	6.69417	4.37179	8.06904	0.799317	0.151171	5.365	3.9061	4.10934	0.649733	5.4703	8.42729	2.09769	4.5464	1.37461	4.40448	3.15757	1	0.986071	Bacteroides cellulosilyticus_msp_0003	Bacteroides	Bacteroidaceae	Bacteroidales	Bacteroidia	Bacteroidetes	Bacteria
msp_0004	-0.000253311	0.000126495	0.0452277	12	0	5.09868e-08	0.654825	0	1	38.1065	NA	NA	NA	10.9736	NA	NA	NA	45.6658	NA	0.80875	0.055343	NA	0.554182	NA	0.414444	0.0466992	0.510439	NA	NA	0.577086	0.0312066	2.25601	NA	1	0.371244	Blastocystis sp. subtype 2_msp_0004	Blastocystis	unclassified Eukaryota	unclassified Eukaryota	unclassified Eukaryota	unclassified Eukaryota	Eukaryota
msp_0005	0.0188919	0.00747872	0.011534	23	0.000768683	0.000370126	1.95127e-05	68.8242	3.20762	4.37832	4.35052	3.25232	5.19252	5.74441	5.73341	6.13348	NA	5.92235	4.34515	5.50719	2.59079	1.23147	5.77075	4.11692	3.60806	1.28015	3.99783	6.45396	3.31541	4.35428	2.62176	4.36269	5.73625	1	0.182514	Escherichia coli_msp_0005	Escherichia	Enterobacteriaceae	Enterobacterales	Gammaproteobacteria	Proteobacteria	Bacteria
msp_0006	-0.00142806	0.000797731	0.0734297	15	2.50877e-06	2.64117e-06	0.0738353	50.5006	2.02023	19.8229	20.7987	NA	NA	NA	NA	NA	NA	23.7187	NA	7.25452	2.96716	NA	3.13968	1.38764	4.42088	0.778816	5.07669	NA	1.0076	2.2826	0.139227	4.68351	2.5213	1	0.452473	Blastocystis sp. subtype 4_msp_0006	Blastocystis	unclassified Eukaryota	unclassified Eukaryota	unclassified Eukaryota	unclassified Eukaryota	Eukaryota
msp_0007	0.00442266	0.00286443	0.12259	23	2.23965e-05	4.75754e-05	0.155951	12.4244	1.14187	6.19386	6.1292	1.91887	1.3281	5.28979	7.1329	5.97042	NA	8.12773	2.163	9.56729	0.880227	0.073603	5.59801	2.44944	3.55993	0.521586	3.42	13.2479	2.4324	5.14917	1.15655	2.96319	4.72682	1	0.558277	Bacteroides ovatus_msp_0007	Bacteroides	Bacteroidaceae	Bacteroidales	Bacteroidia	Bacteroidetes	Bacteria
msp_0008	-0.00315014	0.00186402	0.0910339	22	3.16455e-05	2.14293e-05	0.00799433	49.3429	1.97406	7.51547	3.29727	2.70023	2.29418	3.45342	6.11176	5.08071	NA	6.1926	2.54382	7.94439	6.24958	NA	6.33963	4.30495	4.2183	1.16906	6.86949	8.94283	1.64326	6.30678	1.71622	3.29234	1.81371	1	0.497417	Bacteroides intestinalis_msp_0008	Bacteroides	Bacteroidaceae	Bacteroidales	Bacteroidia	Bacteroidetes	Bacteria
msp_0009	0.00849899	0.00197445	1.67368e-05	23	3.88312e-05	2.49306e-05	0.003335	51.5562	2.06425	4.4463	4.99835	3.5819	2.25119	5.66413	4.66438	5.1739	NA	5.44969	4.96699	8.54387	1.27234	0.575124	4.10172	4.43658	4.90527	0.657539	4.10084	8.19412	2.71924	4.97028	3.7109	4.1628	6.45255	0.0331055	0.00331055	Clostridium bolteae_msp_0009	Lachnoclostridium	Lachnospiraceae	Clostridiales	Clostridia	Firmicutes	Bacteria
msp_0010	0.0150299	0.00301306	6.09318e-07	23	3.41752e-05	5.34604e-05	0.207103	17.6655	1.21456	3.77902	2.10998	1.9312	2.11659	3.60882	4.76042	7.96418	NA	8.93278	4.79639	12.3131	1.37724	0.199913	5.46492	3.72529	3.2265	1.45688	4.23459	10.8901	2.13021	4.50722	5.42607	2.23296	2.81565	0.00120523	0.000351218	Bacteroides fragilis 1_msp_0010	Bacteroides	Bacteroidaceae	Bacteroidales	Bacteroidia	Bacteroidetes	Bacteria
msp_0011	0.00458781	0.00258041	0.0754141	23	1.70489e-05	3.81783e-05	0.153616	11.6312	1.13162	6.22494	5.26101	1.87646	1.96161	7.54913	7.16697	7.35305	NA	7.21795	3.80779	10.368	0.709135	0.0289074	4.43835	3.12762	2.87863	0.614562	3.59576	13.2416	1.04218	4.05503	0.701614	3.15632	3.62343	1	0.455047	Bacteroides thetaiotaomicron_msp_0011	Bacteroides	Bacteroidaceae	Bacteroidales	Bacteroidia	Bacteroidetes	Bacteria
msp_0012	0.00754811	0.00376941	0.0452347	23	0.000164906	9.15911e-05	0.000365427	58.5221	2.41092	5.39685	4.66632	2.78673	2.78816	5.76158	6.70644	6.34349	NA	6.19617	3.84	6.6302	1.61478	0.312532	5.41043	4.85408	4.58954	1.45255	4.17484	6.88517	2.68538	5.04414	2.02312	4.25477	5.58272	1	0.371244	Parabacteroides distasonis_msp_0012	Parabacteroides	Tannerellaceae	Bacteroidales	Bacteroidia	Bacteroidetes	Bacteria
msp_0013	-0.00672047	0.00368726	0.0683607	23	0.000124572	8.46728e-05	0.00605043	48.4218	1.9388	4.92345	4.06342	4.24625	2.5964	5.78851	7.07969	6.09152	NA	7.24111	3.61518	7.77997	1.45805	0.208881	5.65101	4.41734	3.04711	1.11514	4.05624	9.29908	2.09594	5.04089	0.896365	5.48948	3.79898	1	0.444794	Ruminococcus bicirculans_msp_0013	Ruminococcus	Ruminococcaceae	Clostridiales	Clostridia	Firmicutes	Bacteria
msp_0014	0.00276859	0.000744383	0.000199768	23	3.53003e-06	3.22261e-06	0.179256	34.1131	1.51775	4.18754	3.23026	4.03115	2.72914	5.84674	10.814	6.18624	NA	8.25949	11.0686	7.19983	1.41275	0.390311	3.36367	2.24201	1.17848	0.489716	1.99515	9.72252	2.63101	3.07414	1.80603	3.55683	4.58435	0.395142	0.0131714	Eisenbergiella tayi_msp_0014	Eisenbergiella	Lachnospiraceae	Clostridiales	Clostridia	Firmicutes	Bacteria
msp_0015	-0.0189593	0.0057641	0.00100469	23	0.000452355	0.000216305	6.33129e-07	70.4231	3.38101	5.28787	5.05051	4.64158	3.14438	5.14609	5.96301	5.61821	NA	6.17181	4.11976	6.54216	0.948251	0.655233	5.81372	3.93002	4.40904	1.49308	4.45128	6.64445	3.58581	4.82304	1.79774	4.51738	5.24556	1	0.0397453	Roseburia faecis_msp_0015	Roseburia	Lachnospiraceae	Clostridiales	Clostridia	Firmicutes	Bacteria
msp_0016	-0.00787954	0.00436849	0.0712749	22	8.84041e-05	0.000108098	0.245648	23.7008	1.31063	8.42177	3.57961	1.56513	0.81612	3.50283	3.23158	4.29322	NA	6.9068	1.13017	10.1433	1.61126	NA	5.14586	3.8993	1.77901	0.679374	6.6805	11.0849	0.887104	10.2164	8.27344	4.31409	1.83825	1	0.449806	Bacteroides plebeius_msp_0016	Bacteroides	Bacteroidaceae	Bacteroidales	Bacteroidia	Bacteroidetes	Bacteria
msp_0017	-0.0166765	0.00351014	2.02463e-06	23	0.000146748	7.97926e-05	0.000143785	60.4093	2.52585	4.87134	4.89967	5.15921	3.29287	5.44817	6.12641	5.49112	NA	6.68739	4.94913	6.85548	2.24862	0.616269	5.24183	3.48941	3.80468	0.723934	4.49417	7.11818	2.18002	4.389	2.13119	5.15502	4.62687	0.00400471	0.000667452	Roseburia intestinalis_msp_0017	Roseburia	Lachnospiraceae	Clostridiales	Clostridia	Firmicutes	Bacteria
msp_0018	0.00206239	0.0004154	6.8764e-07	23	0	8.08268e-07	0.482685	0	1	1.01375	2.87436	2.19102	1.84736	2.5874	27.5843	2.19029	NA	5.56215	7.21401	7.7801	0.261268	0.21322	3.2725	4.02974	3.87271	0.258421	2.49003	17.2612	1.50584	1.65222	0.533358	1.35017	2.4545	0.00136015	0.000351218	Clostridium sp. KLE 1755 _msp_0018	unclassified Clostridiales	unclassified Clostridiales	Clostridiales	Clostridia	Firmicutes	Bacteria
msp_0019	0.000364582	0.00066714	0.584733	23	5.67962e-07	2.00509e-06	0.44827	5.42046	1.05731	2.22561	38.6522	7.24094	1.88787	5.15734	6.37071	3.18221	NA	7.75713	4.54249	4.50281	0.324184	0.00828376	1.57789	0.658447	1.04969	0.0695735	0.723894	10.3242	0.377353	2.09387	0.0952636	0.88272	0.295299	1	0.906427	Bacteroides faecis_msp_0019	Bacteroides	Bacteroidaceae	Bacteroidales	Bacteroidia	Bacteroidetes	Bacteria
msp_0020	0.00303737	0.00104092	0.00352333	23	1.04492e-05	6.80542e-06	0.0108351	49.8695	1.9948	3.63836	3.28428	2.59375	4.5252	6.99272	7.15339	5.00987	NA	4.05898	6.71256	8.64528	1.24974	0.158142	5.30412	5.62934	2.51955	0.494637	4.87631	6.63752	4.70272	3.13551	4.59749	1.96924	6.11127	1	0.0839655	Clostridium clostridioforme 1_msp_0020	Lachnoclostridium	Lachnospiraceae	Clostridiales	Clostridia	Firmicutes	Bacteria
msp_0021	-0.00025255	0.00188136	0.893215	23	0	1.92489e-05	0.36873	0	1	10.6011	4.41193	2.35728	1.7455	4.89052	5.70675	6.51525	NA	9.71069	2.83975	10.4079	0.51802	0.0409135	3.27679	2.60061	1.96137	0.370742	4.10361	15.876	0.777565	3.58758	0.630489	3.3729	3.69672	1	0.977649	Bacteroides xylanisolvens_msp_0021	Bacteroides	Bacteroidaceae	Bacteroidales	Bacteroidia	Bacteroidetes	Bacteria
msp_0022	0.000114148	0.00177525	0.948732	22	1.43178e-05	1.85822e-05	0.138381	22.5085	1.29046	7.97085	4.80001	2.12387	2.25202	5.29936	6.17178	5.81206	NA	6.9386	2.50862	8.96319	1.40463	NA	5.63979	3.07627	3.08253	0.822674	5.20877	11.8908	1.06877	7.17744	0.691117	3.00652	4.09029	1	0.985644	Bacteroides finegoldii_msp_0022	Bacteroides	Bacteroidaceae	Bacteroidales	Bacteroidia	Bacteroidetes	Bacteria
msp_0023	0.00563313	0.00291207	0.0530635	23	6.27015e-05	5.2886e-05	0.0563115	36.2317	1.56818	6.31574	5.29251	2.31847	2.80751	5.38923	6.64056	6.224	NA	7.27273	3.22116	7.48797	1.34485	0.132423	5.93064	3.40248	4.03028	0.816587	4.22419	9.3808	2.30675	4.54129	2.2892	3.63149	4.99913	1	0.397574	Bacteroides caccae_msp_0023	Bacteroides	Bacteroidaceae	Bacteroidales	Bacteroidia	Bacteroidetes	Bacteria
msp_0024	0.00291791	0.0010407	0.00505031	23	1.32463e-05	7.03994e-06	0.0020294	60.8075	2.55151	5.76832	4.6244	1.03784	3.78964	4.73455	3.88603	5.91279	NA	5.6753	5.335	7.02056	2.60264	0.23071	3.91399	4.28342	5.05939	1.01395	4.82123	6.27967	4.83433	4.59117	5.28658	3.37417	5.9243	1	0.105153	Hungatella hathewayi 2_msp_0024	Hungatella	Clostridiaceae	Clostridiales	Clostridia	Firmicutes	Bacteria
msp_0025	0.00614869	0.00441635	0.163845	23	0.000242888	0.00012556	0.00048521	65.9651	2.93816	4.72938	2.84715	3.90635	4.43371	6.16566	6.60023	5.75144	NA	7.03892	5.02749	6.32567	3.61941	0.424773	5.08735	3.74186	2.94504	0.559547	4.92423	7.17661	2.41936	5.07435	1.91373	5.62453	3.6632	1	0.626878	Akkermansia muciniphila_msp_0025	Akkermansia	Akkermansiaceae	Verrucomicrobiales	Verrucomicrobiae	Verrucomicrobia	Bacteria
msp_0026	-0.00216619	0.00165133	0.189592	22	1.84936e-05	1.62899e-05	0.0309958	35.388	1.5477	6.6495	8.24836	5.29923	1.94025	7.29545	7.1407	5.21864	NA	8.9753	2.72437	6.93311	1.13039	NA	5.61904	2.578	2.9493	0.811417	3.79754	9.51676	1.48723	4.54398	0.816857	3.02667	3.2979	1	0.653934	Paraprevotella clara_msp_0026	Paraprevotella	Prevotellaceae	Bacteroidales	Bacteroidia	Bacteroidetes	Bacteria
msp_0027	-0.000135991	0.00259225	0.958162	23	4.73958e-05	4.12029e-05	0.033352	34.8601	1.53516	6.05009	4.57429	3.067	2.67581	5.88478	7.59407	6.25885	NA	7.30375	3.29841	8.31563	1.24538	0.378783	6.17969	3.09976	2.74525	0.863738	4.35121	9.17475	2.26025	5.43766	1.1518	2.32646	5.76259	1	0.988135	Parabacteroides merdae_msp_0027	Parabacteroides	Tannerellaceae	Bacteroidales	Bacteroidia	Bacteroidetes	Bacteria
msp_0028	-0.000110143	0.00103007	0.914846	22	1.20017e-05	6.78143e-06	0.000722354	59.8147	2.48847	7.54817	3.79623	3.4988	2.42404	4.42038	5.82676	5.9995	NA	5.86649	2.6203	7.39831	3.27685	NA	5.25806	4.9581	4.50679	1.10293	5.29526	6.74393	4.96955	4.9556	1.06174	3.25014	5.22208	1	0.977649	Parabacteroides goldsteinii_msp_0028	Parabacteroides	Tannerellaceae	Bacteroidales	Bacteroidia	Bacteroidetes	Bacteria
msp_0029	-0.0181917	0.0047397	0.000123965	23	0.000254924	0.000144277	0.000704118	58.3425	2.40053	5.88964	5.14142	3.36524	3.40868	5.60471	6.77796	5.43591	NA	6.57719	3.97605	6.80744	2.72698	0.438662	6.18792	3.90971	3.16076	1.7387	3.8622	7.46814	1.68857	5.33697	1.33357	4.58177	4.5818	0.245202	0.0102168	Eubacterium eligens_msp_0029	Eubacterium	Eubacteriaceae	Clostridiales	Clostridia	Firmicutes	Bacteria
msp_0030	0.00162202	0.00298522	0.586888	22	0.000113547	5.68511e-05	0.000504082	80.4807	5.12314	5.16958	1.77058	1.68901	2.59882	5.2749	3.64804	4.30613	NA	4.88519	1.62116	7.63176	7.66228	NA	7.15657	5.16348	5.68653	4.08821	4.25853	5.74321	3.31738	6.28642	4.82936	4.96037	2.25251	1	0.906925	Klebsiella pneumoniae_msp_0030	Klebsiella	Enterobacteriaceae	Enterobacterales	Gammaproteobacteria	Proteobacteria	Bacteria
msp_0031	0.00321242	0.0048213	0.505222	22	8.18357e-05	0.000132636	0.171412	17.2921	1.20907	4.36198	3.51991	2.84316	1.67082	5.36087	5.88507	5.88141	NA	8.98951	1.97633	12.0337	2.0353	NA	6.56265	2.87528	2.53651	0.861813	4.02722	12.6264	1.55235	7.7252	0.85134	3.7811	2.04206	1	0.881584	Bacteroides stercoris_msp_0031	Bacteroides	Bacteroidaceae	Bacteroidales	Bacteroidia	Bacteroidetes	Bacteria
msp_0032	0.00613585	0.00406693	0.131372	23	0.00016859	0.000105295	0.00277905	52.1852	2.0914	6.1274	4.30848	2.80563	3.53336	6.93045	7.02229	6.39992	NA	7.1026	4.57579	6.71495	2.66398	0.396491	5.50079	2.68174	4.2047	1.33282	3.27168	7.79782	2.42199	4.3619	1.88932	3.39131	4.56459	1	0.568938	Alistipes onderdonkii_msp_0032	Alistipes	Rikenellaceae	Bacteroidales	Bacteroidia	Bacteroidetes	Bacteria
msp_0033	0.00152397	0.00093753	0.104052	21	3.11304e-06	4.26974e-06	0.0851647	20.8543	1.26349	7.96648	1.18039	0.674026	0.804833	0.765457	1.27025	2.0975	NA	2.18729	0.34067	19.2965	0.564165	NA	10.3451	6.90005	4.29903	0.161561	6.59147	15.2162	6.3553	8.4108	1.31207	3.26093	NA	1	0.521052	Bacteroides fragilis 2_msp_0033	Bacteroides	Bacteroidaceae	Bacteroidales	Bacteroidia	Bacteroidetes	Bacteria
msp_0034	-0.0108884	0.00324645	0.000796648	22	0.000103181	6.51032e-05	0.000952328	54.876	2.21612	5.13461	5.71796	5.42155	2.20046	6.9683	7.3951	4.97972	NA	7.47835	2.43244	7.29246	1.64412	NA	5.43566	3.03952	2.45628	0.723316	4.556	9.07298	3.34427	4.90606	0.867143	4.0557	4.878	1	0.0350171	Faecalibacterium sp. CAG:74_msp_0034	Faecalibacterium	Ruminococcaceae	Clostridiales	Clostridia	Firmicutes	Bacteria
msp_0035	0.00153102	0.00442078	0.729099	23	9.85716e-05	0.000115216	0.0109871	24.7562	1.32901	6.29567	4.67575	2.91604	2.01793	5.98981	4.6766	7.28074	NA	8.72502	1.46359	9.51482	1.4038	0.101805	5.39816	3.48777	3.14808	0.536626	4.57115	12.2898	2.13456	5.06167	1.31824	3.85818	3.13419	1	0.947338	Bacteroides dorei_msp_0035	Bacteroides	Bacteroidaceae	Bacteroidales	Bacteroidia	Bacteroidetes	Bacteria
msp_0036	0.000166475	0.0023086	0.942514	22	7.37405e-06	2.73352e-05	0.0567656	6.37643	1.06811	8.0471	2.31937	2.61478	2.09795	5.84878	3.12886	6.241	NA	9.92056	0.872077	10.3628	0.151081	NA	5.19955	1.37157	1.94862	0.334097	3.23076	21.0423	1.45808	7.36284	0.746499	4.44724	1.25417	1	0.985644	Bacteroides eggerthii_msp_0036	Bacteroides	Bacteroidaceae	Bacteroidales	Bacteroidia	Bacteroidetes	Bacteria
msp_0037	0.00134402	0.00103519	0.194175	22	1.5352e-06	5.50449e-06	0.374289	6.62983	1.07101	15.8453	3.32418	2.04737	1.12536	4.06898	5.9459	3.64046	NA	5.31737	1.79466	15.3826	0.413529	NA	5.33516	1.62399	1.99752	0.494983	2.4312	14.8076	2.82444	4.79272	1.11333	3.31283	2.36047	1	0.662205	Bacteroides salyersiae_msp_0037	Bacteroides	Bacteroidaceae	Bacteroidales	Bacteroidia	Bacteroidetes	Bacteria
msp_0038	-0.000213598	0.000360947	0.554005	21	7.00118e-07	6.85069e-07	0.0656634	32.5837	1.48332	10.4615	6.54022	NA	3.86246	11.8735	9.34279	8.76132	NA	9.50952	2.84683	4.14778	0.353647	NA	3.11764	1.3403	0.95044	0.236548	2.28611	13.2928	1.36468	4.77043	0.274118	1.63874	3.02855	1	0.891291	unclassified_msp_0038	unclassified	unclassified	unclassified	unclassified	unclassified	unclassified
msp_0039	-0.00663774	0.00329816	0.0441615	23	0.000108335	6.88745e-05	0.00290536	51.0401	2.04249	6.18473	6.12287	4.99639	2.28353	5.97748	5.62398	4.89536	NA	6.88644	2.993	6.67025	2.78688	0.645698	5.44166	3.80081	2.95775	0.963264	4.70695	8.47977	1.87747	5.14669	0.82449	5.51729	4.21724	1	0.371244	Clostridium sp. CAG:127_msp_0039	unclassified Clostridiales	unclassified Clostridiales	Clostridiales	Clostridia	Firmicutes	Bacteria
msp_0040	-0.00837438	0.00383546	0.0290058	22	0.000120951	8.86311e-05	0.0230966	44.7379	1.80956	6.94764	5.64659	6.27214	2.23285	5.72716	4.89706	6.0872	NA	7.42791	1.37532	8.31161	0.821323	NA	6.22746	3.33595	2.95394	1.15576	5.35328	9.76915	1.36435	5.95811	1.14203	4.8333	2.15987	1	0.309899	Bacteroides massiliensis_msp_0040	Bacteroides	Bacteroidaceae	Bacteroidales	Bacteroidia	Bacteroidetes	Bacteria
msp_0041	-0.0112264	0.0110043	0.30764	23	0.00122805	0.0007344	0.00338472	62.9721	2.70066	5.89967	4.20087	3.14925	1.76477	4.10521	3.94271	4.76736	NA	5.43763	1.57726	8.40979	0.941401	0.272662	6.66328	5.66799	4.68145	1.45482	6.15651	8.98138	1.64815	9.13155	0.787014	6.72242	3.63684	1	0.744813	Prevotella copri 1_msp_0041	Prevotella	Prevotellaceae	Bacteroidales	Bacteroidia	Bacteroidetes	Bacteria
msp_0042	-0.00941025	0.00259447	0.000286684	22	5.06747e-05	4.01946e-05	0.00888177	44.0385	1.78694	4.69588	5.38096	5.34396	2.44961	8.22201	7.52341	4.52667	NA	8.5772	4.58452	6.63393	3.30015	NA	3.69552	2.79705	1.68939	0.425502	3.12219	11.9238	2.21346	3.72683	0.235679	4.7819	4.15043	0.56706	0.0164379	Coprococcus eutactus 2_msp_0042	Coprococcus	Lachnospiraceae	Clostridiales	Clostridia	Firmicutes	Bacteria
msp_0043	-0.00271658	0.00300783	0.366436	22	5.61198e-05	5.17507e-05	0.0362685	35.3688	1.54724	5.57901	3.296	1.88786	0.598362	3.27637	1.8446	4.26697	NA	6.85152	0.35445	8.77581	0.701289	NA	6.58283	3.23624	13.2585	0.881451	4.52163	9.74191	3.99167	7.55523	2.55819	5.17333	5.06682	1	0.781539	Bacteroides coprocola_msp_0043	Bacteroides	Bacteroidaceae	Bacteroidales	Bacteroidia	Bacteroidetes	Bacteria
msp_0044	0.00272609	0.000694312	8.62561e-05	23	5.49097e-06	3.10157e-06	0.000404773	57.9352	2.37728	5.71125	4.29955	3.52984	6.61957	4.08567	6.12446	6.24955	NA	5.82501	5.04035	7.32	0.85527	0.522145	4.30118	3.3249	4.57986	1.01626	3.58298	6.88931	4.49116	3.94959	3.06507	2.70935	5.90769	0.170615	0.00853073	Hungatella hathewayi 1_msp_0044	Hungatella	Clostridiaceae	Clostridiales	Clostridia	Firmicutes	Bacteria
msp_0045	-0.00258483	0.00660215	0.695418	23	0.000547365	0.00028344	3.28937e-05	65.4046	2.89056	4.87086	4.51887	4.71592	3.57763	5.19914	6.20329	5.64919	NA	6.35741	3.76316	6.87295	1.81481	0.797374	5.48771	4.25552	4.03357	1.22482	3.68876	7.20052	2.41794	5.73412	2.17989	5.1598	4.27677	1	0.93157	Ruminococcus bromii 2_msp_0045	Ruminococcus	Ruminococcaceae	Clostridiales	Clostridia	Firmicutes	Bacteria
msp_0046	-0.00402919	0.00465489	0.386719	23	7.47499e-05	0.000125122	0.438637	16.0856	1.19169	6.78323	5.41202	2.0179	2.18323	4.86372	8.33357	5.90683	NA	9.5111	3.19906	9.33637	0.819917	0.0740682	5.88299	2.38196	2.29242	0.580505	3.98164	12.2393	1.47821	4.12011	0.615691	3.42371	4.56242	1	0.79432	Bacteroides uniformis_msp_0046	Bacteroides	Bacteroidaceae	Bacteroidales	Bacteroidia	Bacteroidetes	Bacteria
msp_0047	-0.00415167	0.00146468	0.00458937	22	2.09788e-05	1.27111e-05	0.000828814	64.098	2.78536	4.6502	7.24887	8.96092	2.68477	8.98836	7.49418	5.20017	NA	8.27448	3.8658	5.77968	0.890912	NA	4.80733	2.25329	1.90386	0.654505	3.61299	9.44215	2.59134	2.79549	0.412638	4.27155	3.21652	1	0.102325	Eubacterium sp. CAG:115_msp_0047	Eubacterium	Eubacteriaceae	Clostridiales	Clostridia	Firmicutes	Bacteria
msp_0048	-0.00881374	0.00281555	0.00174584	23	8.07222e-05	5.0346e-05	0.00155155	52.1535	2.09002	6.64931	4.26467	2.76882	3.35602	4.80958	6.40469	4.87935	NA	6.84115	4.23715	7.35506	2.14726	0.180866	5.90966	3.62374	3.5645	1.14024	3.70396	8.00757	2.9009	4.90487	1.17416	4.99939	6.17706	1	0.0566111	Eubacterium sp. CAG:38_msp_0048	Eubacterium	Eubacteriaceae	Clostridiales	Clostridia	Firmicutes	Bacteria
msp_0049	0.000534593	0.00025373	0.0351228	22	3.39787e-07	3.43775e-07	0.118428	31.4887	1.45961	6.19896	5.49099	0.818341	6.52167	0.507244	6.53748	14.6387	NA	3.14335	NA	13.7277	0.0759509	0.01653	2.81138	5.59799	5.54938	0.317345	4.4852	8.48649	2.9349	3.68882	0.720271	0.797103	6.93417	1	0.340554	unclassified Lachnoclostridium_msp_0049	Lachnoclostridium	Lachnospiraceae	Clostridiales	Clostridia	Firmicutes	Bacteria
msp_0050	-0.0047574	0.00229224	0.0379457	23	7.56296e-05	3.47434e-05	1.9185e-07	72.786	3.67458	4.6904	4.50693	4.11547	3.72205	5.20085	5.9997	5.03979	NA	5.84839	5.9192	6.27503	2.1075	0.771281	5.09382	3.62383	3.76877	1.74466	4.82644	6.1374	3.54623	5.18123	2.26381	4.57459	5.04267	1	0.349101	Eubacterium hallii_msp_0050	Eubacterium	Eubacteriaceae	Clostridiales	Clostridia	Firmicutes	Bacteria
msp_0051	-0.000807616	0.000799287	0.312294	2	0	6.3001e-05	0.674314	0	1	NA	NA	NA	NA	NA	NA	NA	NA	NA	NA	NA	0.722256	NA	99.2777	NA	NA	NA	NA	NA	NA	NA	NA	NA	NA	1	0.750567	unclassified_msp_0051	unclassified	unclassified	unclassified	unclassified	unclassified	unclassified
msp_0052	0.00158744	0.00119539	0.184189	23	1.44327e-05	8.83068e-06	0.00966592	56.035	2.27454	1.78532	5.38702	2.19284	3.21029	3.86706	8.37058	5.26967	NA	5.22526	8.1296	8.38074	0.226174	0.245099	5.90308	4.5841	6.68929	1.00463	4.11809	6.11468	5.96978	2.98318	4.91634	2.71244	2.71472	1	0.650535	Blautia sp. CAG:257_msp_0052	Blautia	Lachnospiraceae	Clostridiales	Clostridia	Firmicutes	Bacteria
msp_0053	-6.08737e-05	0.00257162	0.981115	23	4.72773e-05	3.84962e-05	0.0226683	40.3273	1.67581	4.3176	5.66435	5.77562	2.61569	6.16712	10.7997	6.8325	NA	9.82019	5.11389	6.41134	1.18686	0.804355	4.57093	2.2228	1.62397	0.373425	3.66753	10.9336	0.683122	2.61581	0.946349	2.91888	3.93436	1	0.994909	Eubacterium siraeum_msp_0053	Ruminiclostridium	Ruminococcaceae	Clostridiales	Clostridia	Firmicutes	Bacteria
msp_0054	0.00221112	0.000752721	0.00330863	22	2.12918e-06	3.23051e-06	0.186481	18.7349	1.23054	13.595	2.21371	2.18684	1.94761	3.27277	6.34156	4.66201	NA	6.84708	2.52618	9.87193	2.56886	NA	3.63918	3.78127	2.14953	0.300609	3.27769	11.6977	2.90608	5.40869	2.39363	2.08786	6.3242	1	0.0831138	Bacteroides nordii_msp_0054	Bacteroides	Bacteroidaceae	Bacteroidales	Bacteroidia	Bacteroidetes	Bacteria
msp_0055	-0.00355295	0.00260538	0.172663	23	3.35437e-05	4.04706e-05	0.103948	23.6077	1.30903	6.21685	3.19664	4.44671	2.28554	5.93633	8.25502	5.49564	NA	8.22045	3.38685	8.41155	0.876654	0.772284	6.32084	2.8993	2.40225	0.344916	4.15164	10.371	1.52353	3.22177	0.681598	3.48385	7.09883	1	0.638724	Firmicutes bacterium CAG:65 _msp_0055	unclassified Clostridiales	unclassified Clostridiales	Clostridiales	Clostridia	Firmicutes	Bacteria
msp_0056	0.00290422	0.000849327	0.000627514	23	6.59359e-06	4.54329e-06	0.000326918	47.0092	1.88712	6.33518	4.94233	2.7674	1.74115	4.43401	5.37908	5.46513	NA	5.82413	5.77945	9.09552	1.70257	0.230338	4.73779	4.85146	3.74482	0.702559	3.79038	7.96108	3.03641	5.03691	2.05516	4.01895	6.36818	1	0.0288656	unclassified Clostridiales_msp_0056	unclassified Clostridiales	unclassified Clostridiales	Clostridiales	Clostridia	Firmicutes	Bacteria
msp_0057	-0.00313432	0.00171816	0.0681162	23	3.80885e-06	1.67146e-05	0.324733	5.64832	1.05986	4.18884	3.6521	5.28912	1.54722	6.45283	9.38406	5.83339	NA	10.0871	6.95855	9.37923	0.390515	0.144041	5.1593	2.53805	2.4621	0.23697	2.21712	12.3915	1.65764	4.06173	0.769269	2.22686	2.97241	1	0.444666	Roseburia sp. CAG:45 _msp_0057	Roseburia	Lachnospiraceae	Clostridiales	Clostridia	Firmicutes	Bacteria
msp_0058	0.0167058	0.00504176	0.000921419	23	0.000310058	0.000162735	4.25401e-05	65.6078	2.90763	3.81193	5.17082	3.38838	2.95178	5.77593	6.35682	5.99205	NA	6.51472	6.02935	7.42131	2.12182	0.5795	6.09166	3.58887	1.92981	1.37746	5.51206	7.08308	2.94692	4.0177	1.83366	5.40596	4.09841	1	0.0387355	Ruminococcus gnavus_msp_0058	Blautia	Lachnospiraceae	Clostridiales	Clostridia	Firmicutes	Bacteria
msp_0059	-0.000262574	0.00238895	0.912479	22	5.04215e-05	3.52776e-05	0.015759	46.4481	1.86735	6.00438	5.69352	4.42235	2.70412	7.28697	7.35275	5.61228	NA	7.74245	3.77565	7.25017	1.01551	NA	5.61102	3.01769	3.00785	0.764465	4.31514	8.37711	1.89431	4.5116	1.1286	4.34254	4.16951	1	0.977649	Barnesiella intestinihominis_msp_0059	Barnesiella	Barnesiellaceae	Bacteroidales	Bacteroidia	Bacteroidetes	Bacteria
msp_0060	-0.00304174	0.000979773	0.0019058	22	6.8189e-06	5.68809e-06	0.0845476	38.2996	1.62074	5.97615	4.74582	7.42296	1.6288	6.96498	8.8427	5.10175	NA	7.10281	6.84355	5.64922	1.11224	NA	3.66562	1.81378	2.05908	0.588934	3.46892	10.6258	2.02528	2.88416	0.793761	3.72332	6.96036	1	0.0603667	Firmicutes bacterium CAG:95_msp_0060	unclassified Firmicutes	unclassified Firmicutes	unclassified Firmicutes	unclassified Firmicutes	Firmicutes	Bacteria
msp_0061	-4.68656e-05	0.000302418	0.876845	21	3.5529e-07	4.96304e-07	0.435616	20.9469	1.26497	5.55757	8.24333	0.512337	1.15837	2.02488	4.06686	9.66599	NA	3.4945	0.614763	15.8014	4.50295	NA	4.90524	0.990419	1.65948	1.8421	3.72156	7.13887	9.50816	4.66634	NA	1.66747	8.25739	1	0.977649	Bacteroides congonensis_msp_0061	Bacteroides	Bacteroidaceae	Bacteroidales	Bacteroidia	Bacteroidetes	Bacteria
msp_0062	0.000208382	0.00183649	0.90966	23	3.84416e-05	2.16838e-05	0.000203927	57.9522	2.37825	5.8862	3.54764	2.85897	2.98134	5.28451	6.56119	5.63752	NA	6.42139	4.13018	7.04868	2.00567	0.203663	5.67571	4.54983	4.19038	1.39884	4.89438	7.19576	2.20327	4.9861	1.9944	4.81527	5.52913	1	0.977649	Odoribacter splanchnicus_msp_0062	Odoribacter	Odoribacteraceae	Bacteroidales	Bacteroidia	Bacteroidetes	Bacteria
msp_0063	-0.00122789	0.00128815	0.340481	22	1.04096e-05	9.89282e-06	0.104835	32.4384	1.48013	7.87266	6.49365	2.23173	1.12988	6.26707	5.19521	5.66896	NA	6.85967	2.81588	7.93778	1.19641	NA	4.06575	1.90079	5.31228	0.217259	3.89645	10.9457	1.98903	6.66913	1.80137	6.126	3.40731	1	0.776783	Bacteroides clarus_msp_0063	Bacteroides	Bacteroidaceae	Bacteroidales	Bacteroidia	Bacteroidetes	Bacteria
msp_0064	-0.00018054	0.000527804	0.732307	20	3.16257e-07	1.02322e-06	0.513854	5.73144	1.0608	0.681288	3.04609	5.18653	NA	18.2031	2.67256	1.38522	NA	31.6461	0.0460861	1.75737	NA	NA	0.641018	0.355154	0.315685	0.107634	0.939459	28.9833	0.252258	2.39591	0.00370349	1.25548	0.126101	1	0.947934	Alistipes sp. CAG:435_msp_0064	Alistipes	Rikenellaceae	Bacteroidales	Bacteroidia	Bacteroidetes	Bacteria
msp_0065	-0.00240617	0.00120048	0.0450348	22	1.13189e-05	8.03917e-06	0.0276943	51.0043	2.04099	2.46365	8.67805	2.79856	4.21739	9.15677	9.59068	4.27545	NA	9.80662	9.57923	5.72416	0.719289	NA	2.46526	1.73519	1.61371	0.511691	2.56672	10.9386	0.629391	2.77797	0.803547	2.91979	6.02823	1	0.371244	Ruminococcus sp. CAG:17 _msp_0065	Blautia	Lachnospiraceae	Clostridiales	Clostridia	Firmicutes	Bacteria
msp_0066	0.00118199	0.0020441	0.563099	23	4.86358e-05	2.68997e-05	0.000201329	59.7948	2.48724	3.08278	4.75294	2.04469	2.28837	4.37692	5.54333	6.00142	NA	6.0139	4.86154	7.07834	2.93779	0.896758	4.83397	5.29569	2.71615	0.417973	5.12204	6.80638	7.23723	5.88679	4.75532	3.0041	4.04558	1	0.896787	Clostridium sp. AT4_msp_0066	Clostridium	Clostridiaceae	Clostridiales	Clostridia	Firmicutes	Bacteria
msp_0067	0.00190624	0.00137611	0.16598	22	1.25076e-05	9.92858e-06	0.0498818	44.981	1.81755	3.40155	11.9584	1.31405	2.28333	5.18078	1.6789	2.83779	NA	11.3482	0.360539	7.75987	0.349212	NA	2.46588	1.36878	3.56502	0.0706018	1.889	10.5471	0.649661	9.74378	6.59157	12.6112	2.0248	1	0.631361	Prevotella sp. 109 _msp_0067	Prevotella	Prevotellaceae	Bacteroidales	Bacteroidia	Bacteroidetes	Bacteria
msp_0068	-0.0129165	0.00638795	0.043175	23	0.000480342	0.000262778	0.000430193	60.2552	2.51605	5.1099	4.75198	4.81923	2.96763	5.40055	6.2109	5.9091	NA	6.58887	4.22672	6.82787	2.14639	0.319732	5.75392	3.45564	3.55571	1.12509	4.07472	7.27977	2.27915	4.93534	1.71378	5.3603	5.18769	1	0.369697	Eubacterium rectale_msp_0068	unclassified Lachnospiraceae	Lachnospiraceae	Clostridiales	Clostridia	Firmicutes	Bacteria
msp_0069	-0.00199648	0.00516008	0.698824	23	0	0.000146476	0.506277	0	1	5.53633	3.49045	2.30939	1.64099	4.6771	7.22276	5.84639	NA	10.1533	2.13221	12.4561	0.523593	0.0860077	6.61386	1.76312	2.27226	0.420545	3.75051	14.5628	1.5243	4.37824	0.53366	3.89137	4.21465	1	0.933338	Bacteroides vulgatus_msp_0069	Bacteroides	Bacteroidaceae	Bacteroidales	Bacteroidia	Bacteroidetes	Bacteria
msp_0070	0.000661631	0.00154305	0.668083	21	1.80134e-05	1.40516e-05	0.160261	42.0336	1.72514	9.40705	1.95238	0.32792	6.01663	3.32527	2.0999	5.74762	NA	6.02851	6.15844	8.20345	5.93431	NA	8.42351	2.02831	5.79506	1.66082	4.32001	8.4568	NA	5.03402	1.91474	6.0815	1.08376	1	0.930503	Akkermansia sp. CAG:344_msp_0070	Akkermansia	Akkermansiaceae	Verrucomicrobiales	Verrucomicrobiae	Verrucomicrobia	Bacteria
msp_0071	-0.00317251	0.00195502	0.104642	23	4.01606e-05	2.44876e-05	0.0274707	53.1574	2.13481	5.95379	4.78842	3.3155	3.08132	5.54236	7.1284	5.59533	NA	6.75723	4.46156	7.23661	1.58859	1.06161	4.9364	3.59018	3.48465	1.14006	4.22163	7.47429	2.70772	4.94155	1.11463	5.07862	4.79953	1	0.522682	Roseburia hominis_msp_0071	Roseburia	Lachnospiraceae	Clostridiales	Clostridia	Firmicutes	Bacteria
msp_0072	-0.0108065	0.0033791	0.0013837	23	0.000105652	7.21299e-05	0.00733794	46.9557	1.88522	5.31994	5.00727	3.74288	3.25255	4.79019	7.58613	5.19866	NA	7.22671	3.64878	7.64227	1.54897	0.199331	5.41556	3.81257	4.1122	1.54561	3.52264	8.37445	2.07036	4.98772	1.11742	5.01743	4.86036	1	0.0481425	Roseburia inulinivorans_msp_0072	Roseburia	Lachnospiraceae	Clostridiales	Clostridia	Firmicutes	Bacteria
msp_0073	-0.000423834	0.000229981	0.0653421	22	7.34731e-08	2.319e-07	0.607431	6.26963	1.06689	13.2178	3.02526	40.0346	1.25057	5.27739	7.48549	5.26567	NA	4.23206	0.952151	2.00322	0.245227	NA	1.25758	0.422144	0.353457	0.087808	0.674647	7.58666	0.405594	1.93873	0.272003	0.891484	3.12036	1	0.437735	unclassified_msp_0073	unclassified	unclassified	unclassified	unclassified	unclassified	unclassified
msp_0074	-0.00238862	0.000648025	0.000227814	23	1.09989e-07	2.03599e-06	0.227364	1.05739	1.01069	7.7373	5.23719	3.49712	0.964817	3.83464	6.03288	3.7872	NA	12.353	3.74304	2.79519	0.807355	0.00912956	2.84558	1.4861	1.20276	0.272769	5.04984	29.2438	0.650901	2.86089	0.476542	1.84178	3.27021	0.450617	0.0143815	Roseburia sp. CAG:100_msp_0074	Roseburia	Lachnospiraceae	Clostridiales	Clostridia	Firmicutes	Bacteria
msp_0075	-0.00962527	0.00434228	0.0266479	23	0.000263839	0.000122719	7.2066e-06	71.7671	3.54197	5.77134	4.84388	4.40118	3.20922	5.23598	5.90038	5.56497	NA	5.93666	4.93015	6.23608	1.44472	0.342485	5.61845	3.57685	4.47506	1.98013	4.62925	6.41396	2.30701	4.87672	1.63827	5.05841	5.60881	1	0.300164	Clostridium sp. CAG:91 _msp_0075	unclassified Clostridiales	unclassified Clostridiales	Clostridiales	Clostridia	Firmicutes	Bacteria
msp_0076	-0.000729112	0.00357513	0.8384	23	0.000150475	8.30511e-05	0.000569273	59.3019	2.45712	3.66522	4.47459	4.30878	3.23429	5.07205	6.72254	5.28235	NA	5.74372	4.0211	6.86107	2.56383	0.0922368	5.76675	3.89861	3.66918	1.37372	5.36922	7.15826	3.12548	5.18154	2.038	5.01696	5.36049	1	0.969276	Blautia wexlerae_msp_0076	Blautia	Lachnospiraceae	Clostridiales	Clostridia	Firmicutes	Bacteria
msp_0077	-0.00448822	0.00153803	0.00352089	22	2.9716e-05	1.49494e-05	7.07376e-05	75.2576	4.04165	5.02877	6.05251	6.63922	1.77422	6.48569	3.72179	4.98426	NA	6.8056	3.58166	5.49067	2.39522	NA	4.95465	6.34423	2.99562	1.88087	5.05032	7.72369	2.92443	3.84858	0.770407	3.28626	7.26132	1	0.0839655	unclassified Firmicutes_msp_0077	unclassified Firmicutes	unclassified Firmicutes	unclassified Firmicutes	unclassified Firmicutes	Firmicutes	Bacteria
msp_0078	-8.75363e-05	0.000712246	0.902185	13	1.42446e-06	1.94194e-06	0.655408	39.4794	1.65233	29.9157	NA	31.0215	NA	0.54293	NA	NA	NA	1.20829	2.83623	7.49495	4.6316	NA	7.42406	2.32409	0.351792	NA	2.2449	9.07207	NA	NA	NA	NA	0.93194	1	0.977649	Prevotella sp. CAG:732_msp_0078	Prevotella	Prevotellaceae	Bacteroidales	Bacteroidia	Bacteroidetes	Bacteria
msp_0079	-0.00410782	0.00182421	0.0243328	23	5.95303e-06	1.90189e-05	0.0986378	7.94321	1.08629	6.81464	4.31724	2.62037	3.16512	4.95623	7.90677	5.34289	NA	8.55742	3.17409	10.6291	1.28198	0.168597	3.84135	3.14415	2.67554	0.609158	3.77709	14.6005	1.4882	4.22038	0.858495	3.5761	2.27456	1	0.282775	Clostridium sp. CAG:7_msp_0079	unclassified Clostridiales	unclassified Clostridiales	Clostridiales	Clostridia	Firmicutes	Bacteria
msp_0080	0.000595646	0.00043154	0.1675	19	0	7.70877e-07	0.885074	0	1	6.59313	3.20492	NA	0.288408	2.12987	0.899871	41.6235	NA	9.55539	0.0474509	16.9667	0.219023	NA	1.28563	0.490715	1.28746	2.68572	1.57407	6.29366	NA	1.18762	NA	3.4488	0.218074	1	0.635566	Prevotellamassilia timonensis_msp_0080	Prevotellamassilia	Prevotellaceae	Bacteroidales	Bacteroidia	Bacteroidetes	Bacteria
msp_0081	0.0005536	0.000783099	0.479606	22	6.93268e-07	2.54397e-06	0.183745	4.84752	1.05094	1.45333	2.7158	2.40117	1.28792	10.1268	1.28327	12.1978	NA	43.3091	5.07157	1.57794	0.301572	NA	0.849673	0.445527	0.349328	0.0782153	1.72972	12.7117	0.158699	0.682349	0.0533187	0.670815	0.544448	1	0.857689	unclassified Prevotella_msp_0081	Prevotella	Prevotellaceae	Bacteroidales	Bacteroidia	Bacteroidetes	Bacteria
msp_0082c	3.57079e-05	2.48369e-05	0.150521	4	0	5.12141e-09	0.634823	0	1	NA	NA	NA	NA	0.700321	9.0715	NA	NA	NA	NA	NA	NA	NA	NA	NA	NA	NA	NA	89.544	NA	NA	NA	NA	0.684189	1	0.606435	Providencia rettgeri 2_msp_0082c	Providencia	Morganellaceae	Enterobacterales	Gammaproteobacteria	Proteobacteria	Bacteria
msp_0083	-0.000872263	0.000830315	0.293479	22	3.88448e-06	4.02381e-06	0.0956409	28.7373	1.40326	10.148	4.80096	3.85073	2.18901	5.8415	5.64404	7.268	NA	6.43656	2.46155	8.88321	0.569481	NA	6.68064	1.95486	7.04892	0.478791	3.13621	7.78214	1.13427	6.38814	0.327676	5.92369	1.05161	1	0.730433	Parabacteroides johnsonii_msp_0083	Parabacteroides	Tannerellaceae	Bacteroidales	Bacteroidia	Bacteroidetes	Bacteria
msp_0084	0.00092729	0.00122698	0.449801	21	4.09617e-06	6.92904e-06	0.256309	16.0151	1.19069	9.39583	4.3203	1.05196	0.23405	4.12101	6.07222	5.4636	NA	2.54041	0.574491	2.1699	0.276049	NA	1.81931	0.817988	0.80284	0.14989	2.80516	6.22775	NA	13.1432	8.04414	29.4286	0.541319	1	0.840103	Prevotella sp. CAG:386_msp_0084	Prevotella	Prevotellaceae	Bacteroidales	Bacteroidia	Bacteroidetes	Bacteria
msp_0085	0.000395193	0.000185678	0.033306	19	1.06854e-07	1.62988e-07	0.802408	19.4223	1.24104	2.08744	2.10148	0.309695	2.09014	7.4631	15.7049	2.73138	NA	4.77711	NA	18.9756	NA	NA	3.77472	0.965866	7.98147	0.393932	1.70115	15.8139	1.36201	5.15275	NA	1.26566	5.34783	1	0.336118	unclassified Eisenbergiella_msp_0085	Eisenbergiella	Lachnospiraceae	Clostridiales	Clostridia	Firmicutes	Bacteria
msp_0086	0.00488106	0.00118932	4.05933e-05	23	1.71922e-05	9.0473e-06	1.05146e-06	65.3239	2.88383	5.63077	4.41289	1.35087	3.83669	4.36125	6.14717	6.04197	NA	4.69861	6.47892	7.64894	1.42684	0.159581	5.94731	4.6468	4.83439	0.748643	3.94564	6.90448	3.73432	4.62289	3.55882	3.21341	5.64879	0.0802935	0.00569958	Clostridium symbiosum_msp_0086	Lachnoclostridium	Lachnospiraceae	Clostridiales	Clostridia	Firmicutes	Bacteria
msp_0087	-0.00906657	0.00381454	0.0174615	23	0.000163327	9.51716e-05	0.00105572	55.6506	2.25482	5.45318	4.86542	3.09923	2.83685	5.17466	4.77269	5.43028	NA	6.74924	3.25513	6.69852	2.72425	6.07998	5.49336	4.24415	3.14348	0.866512	3.51015	7.36684	2.37739	4.66461	1.70112	4.50355	4.9894	1	0.22531	Lactobacillus rogosae_msp_0087	Lactobacillus	Lactobacillaceae	Lactobacillales	Bacilli	Firmicutes	Bacteria
msp_0088	0.00029791	0.000314058	0.342833	20	8.38832e-07	5.35895e-07	0.0178002	73.7603	3.81102	11.4528	2.16001	1.50273	0.633588	2.43713	4.37539	4.47523	NA	3.49954	1.37566	9.32222	NA	NA	8.17274	8.64788	NA	2.18667	7.14491	11.2354	1.49095	9.37393	0.663144	2.96786	6.88225	1	0.778259	unclassified Butyricimonas_msp_0088	Butyricimonas	Odoribacteraceae	Bacteroidales	Bacteroidia	Bacteroidetes	Bacteria
msp_0089	0.00285647	0.00137869	0.0382777	23	0	1.01363e-05	0.383008	0	1	5.65497	5.28121	2.26977	2.13606	7.06862	6.3234	5.34108	NA	12.8433	2.27485	7.94494	0.839576	0.232207	4.79307	1.30857	1.92317	0.318899	4.20173	18.5634	1.25929	3.38699	0.680143	2.96344	2.39126	1	0.350525	Alistipes finegoldii_msp_0089	Alistipes	Rikenellaceae	Bacteroidales	Bacteroidia	Bacteroidetes	Bacteria
msp_0090	0.000709504	0.00481826	0.882932	23	0.000230778	0.000146564	0.0062588	50.8762	2.03567	5.11278	5.24466	2.92545	2.93847	5.14945	6.45363	6.15754	NA	6.98281	4.21692	7.75101	1.16449	0.625002	5.98164	4.2067	3.32569	0.902028	3.7566	7.87675	1.69526	4.77611	1.76256	6.02715	4.96729	1	0.977649	Alistipes putredinis_msp_0090	Alistipes	Rikenellaceae	Bacteroidales	Bacteroidia	Bacteroidetes	Bacteria
msp_0091	0.00219195	0.000872352	0.0119816	19	0	3.15312e-06	0.851246	0	1	31.1211	2.12435	0.325667	1.3583	3.97381	1.97077	1.13424	NA	8.15454	0.636448	12.4158	1.4012	NA	2.06042	0.222178	1.18081	NA	5.14694	21.0899	0.0942971	4.33597	NA	NA	1.25329	1	0.185152	Prevotella sp. CAG:604_msp_0091	Prevotella	Prevotellaceae	Bacteroidales	Bacteroidia	Bacteroidetes	Bacteria
msp_0092	-0.00132703	0.00152074	0.382868	23	1.25719e-05	1.31308e-05	0.0886891	27.8064	1.38516	8.6699	2.87656	5.56064	2.52711	9.01972	10.2811	6.81994	NA	10.8866	2.01651	6.9223	0.444949	0.148401	5.43154	2.53531	1.69988	0.543772	3.44291	8.91631	1.02956	3.29573	0.910351	2.9905	3.03048	1	0.792394	Sutterella wadsworthensis 1_msp_0092	Sutterella	Sutterellaceae	Burkholderiales	Betaproteobacteria	Proteobacteria	Bacteria
msp_0093	-0.0041433	0.00217785	0.0571095	23	5.59884e-05	3.01899e-05	2.60239e-05	63.7622	2.75955	5.58174	5.1446	5.73308	2.72175	6.0214	6.76738	5.27241	NA	6.91562	4.51627	6.64011	1.72301	0.380081	5.34569	4.02106	2.99491	0.914998	4.15624	7.79972	2.32778	4.81638	1.2387	4.38649	4.58057	1	0.410117	Clostridium sp. CAG:62_msp_0093	unclassified Clostridiales	unclassified Clostridiales	Clostridiales	Clostridia	Firmicutes	Bacteria
msp_0094	0.000238878	0.000851038	0.778948	15	4.54069e-06	3.32142e-06	0.186051	77.9369	4.53246	15.2978	1.84875	0.68868	0.684024	1.90946	2.13678	3.23189	NA	2.81649	1.77464	15.4803	NA	NA	NA	NA	10.7899	NA	7.78879	10.2893	NA	14.2619	NA	NA	11.0013	1	0.960102	unclassified Roseburia_msp_0094	Roseburia	Lachnospiraceae	Clostridiales	Clostridia	Firmicutes	Bacteria
msp_0095	-0.00366588	0.00350183	0.295169	23	8.64586e-05	7.05138e-05	0.0242205	42.3668	1.73511	4.66528	3.21907	4.61116	2.08789	5.56337	8.71375	4.38511	NA	10.2751	5.37737	9.02349	1.30765	0.28485	4.03806	2.39651	1.74178	1.51379	3.81541	12.6419	1.70907	5.36216	0.33991	6.1353	0.792041	1	0.730433	unclassified Eubacterium_msp_0095	Eubacterium	Eubacteriaceae	Clostridiales	Clostridia	Firmicutes	Bacteria
msp_0096	-0.000314271	0.000214244	0.142407	13	0	1.44696e-07	0.826205	0	1	0.292118	NA	NA	NA	NA	NA	NA	NA	34.9222	0.0288485	0.14998	0.0426929	NA	0.186792	NA	0.0659384	0.00368105	1.62611	61.8405	0.0146099	0.195585	NA	0.630896	NA	1	0.591768	Bacteroides sp. CAG:443_msp_0096	Bacteroides	Bacteroidaceae	Bacteroidales	Bacteroidia	Bacteroidetes	Bacteria
msp_0097	-0.000136334	0.00048187	0.777233	18	0	1.10453e-06	0.665652	0	1	NA	2.9592	6.18224	1.13313	4.13034	9.79248	4.18288	NA	12.9649	NA	2.32274	0.604538	NA	4.49283	NA	0.787452	0.303538	5.4443	4.46125	NA	11.1615	4.16464	1.13496	23.7771	1	0.960102	Paraprevotella xylaniphila_msp_0097	Paraprevotella	Prevotellaceae	Bacteroidales	Bacteroidia	Bacteroidetes	Bacteria
msp_0098	0.000378156	0.000228865	0.0984707	20	1.83545e-07	2.63072e-07	0.24922	20.8153	1.26287	NA	0.503545	1.00827	5.11684	2.19189	1.8628	6.20292	NA	1.83075	4.08134	16.0011	NA	NA	5.36644	1.61155	5.93163	0.19526	18.0774	8.7118	1.71815	7.89273	1.50329	7.58494	2.60735	1	0.517683	Parabacteroides gordonii_msp_0098	Parabacteroides	Tannerellaceae	Bacteroidales	Bacteroidia	Bacteroidetes	Bacteria
msp_0099	-5.9821e-06	6.31032e-05	0.924475	12	0	1.26743e-08	0.484847	0	1	NA	NA	NA	1.64307	NA	NA	31.6778	NA	28.8089	NA	0.781426	NA	NA	0.402866	0.508074	NA	0.0623205	0.780012	33.5238	NA	1.29418	0.0186918	0.498825	NA	1	0.977649	unclassified_msp_0099	unclassified	unclassified	unclassified	unclassified	unclassified	unclassified
msp_0100	0.000708897	0.000354626	0.0456081	14	6.0538e-07	5.64458e-07	0.0748183	54.3195	2.18912	NA	3.17445	0.231676	NA	3.15109	6.12586	20.4094	NA	10.5256	NA	NA	1.58	NA	5.40958	NA	NA	1.59243	0.602697	15.0901	NA	10.9157	NA	12.592	8.59945	1	0.371244	Morganella morganii_msp_0100	Morganella	Morganellaceae	Enterobacterales	Gammaproteobacteria	Proteobacteria	Bacteria
msp_0101	-0.000198354	0.000681682	0.771069	11	7.04149e-07	1.77011e-06	0.152173	14.5043	1.16965	9.40341	NA	NA	NA	17.2817	NA	NA	NA	21.0226	NA	6.2709	NA	NA	1.04926	NA	1.55948	0.108715	2.01461	NA	NA	28.4845	0.0235577	12.7812	NA	1	0.960102	Bacteroides sp. CAG:875 _msp_0101	Bacteroides	Bacteroidaceae	Bacteroidales	Bacteroidia	Bacteroidetes	Bacteria
msp_0102	7.04959e-05	0.000533038	0.894784	7	0	1.25531e-06	0.922778	0	1	NA	67.9847	0.776363	3.14741	7.27404	15.8376	NA	NA	2.52964	2.45032	NA	NA	NA	NA	NA	NA	NA	NA	NA	NA	NA	NA	NA	NA	1	0.977649	unclassified Bacteroides_msp_0102	Bacteroides	Bacteroidaceae	Bacteroidales	Bacteroidia	Bacteroidetes	Bacteria
msp_0103	0.00292895	0.000781309	0.000177703	23	4.81957e-06	3.60862e-06	2.16928e-06	47.1727	1.89296	3.65048	5.01476	1.70102	4.36409	4.45095	4.90764	6.59508	NA	6.49139	10.2752	11.339	0.301047	0.0377752	4.0673	5.15222	4.87883	0.407639	2.81944	8.77288	2.28416	4.13902	0.793316	3.08559	4.47122	0.351497	0.012141	Clostridium innocuum_msp_0103	Erysipelatoclostridium	Erysipelotrichaceae	Erysipelotrichales	Erysipelotrichia	Firmicutes	Bacteria
msp_0104	0.000591183	0.000267431	0.0270635	20	4.7583e-07	3.99742e-07	0.0662248	41.8046	1.71835	3.82244	1.55156	2.99002	2.26173	2.16723	8.42182	6.0805	NA	4.18314	6.25935	11.0998	3.94637	NA	7.36952	11.7068	9.53308	1.45665	3.23359	8.17349	NA	2.5975	NA	1.31418	1.8313	1	0.300854	Emergencia timonensis_msp_0104	Emergencia	Clostridiales Family XIII. Incertae Sedis	Clostridiales	Clostridia	Firmicutes	Bacteria
msp_0105	0.00375227	0.00233416	0.107934	22	2.88739e-05	3.11013e-05	0.0428221	28.4251	1.39714	5.69056	3.77399	4.95755	1.58901	5.99868	11.0664	5.35031	NA	10.029	3.71605	7.8676	0.985745	NA	3.79768	3.38026	2.79117	0.331678	3.69415	12.797	1.84004	3.92284	0.520581	3.79531	2.10444	1	0.531077	Ruminococcus sp. CAG:177_msp_0105	Ruminococcus	Ruminococcaceae	Clostridiales	Clostridia	Firmicutes	Bacteria
msp_0106	-0.00107054	0.00102462	0.296107	21	5.77064e-06	5.49592e-06	0.077535	36.2823	1.56942	3.73229	6.64918	NA	1.98106	12.3106	11.9799	5.59914	NA	10.0048	1.85436	4.4159	2.19981	NA	2.62906	1.08633	1.48972	0.972087	2.22699	15.1006	2.37845	2.02471	0.497145	2.75299	8.11494	1	0.730433	Firmicutes bacterium CAG:240_msp_0106	unclassified Firmicutes	unclassified Firmicutes	unclassified Firmicutes	unclassified Firmicutes	Firmicutes	Bacteria
msp_0107	-0.00860656	0.00387955	0.0265246	23	0.000198867	9.87219e-05	6.67104e-05	67.0932	3.03889	3.99234	4.93588	4.03224	3.86073	5.47771	4.68909	5.41264	NA	6.04963	4.04731	6.63548	2.18281	0.488734	5.53059	3.50774	4.78715	1.27173	5.02243	6.76302	3.4374	4.6404	2.26913	5.11413	5.85168	1	0.300164	Anaerostipes hadrus 1_msp_0107	Anaerostipes	Lachnospiraceae	Clostridiales	Clostridia	Firmicutes	Bacteria
msp_0108	0.000676761	0.000341643	0.0476021	22	5.29374e-07	6.08777e-07	0.0703029	26.4787	1.36015	5.42167	3.29979	1.23697	0.617062	1.9221	3.98743	0.949659	NA	1.94972	2.51445	16.7086	0.821934	NA	3.16569	7.54873	10.4814	5.63054	7.6667	6.55371	0.152459	13.4774	3.567	1.73643	0.590575	1	0.378391	Enterobacter xiangfangensis_msp_0108	Enterobacter	Enterobacteriaceae	Enterobacterales	Gammaproteobacteria	Proteobacteria	Bacteria
msp_0109	0.00159132	0.000648636	0.0141541	23	4.06568e-06	2.58274e-06	0.00277244	57.605	2.35877	3.93749	3.19159	2.58363	2.42782	3.61947	7.3043	4.6731	NA	6.2722	8.80598	9.64847	1.83303	0.363203	4.73243	6.86246	3.70383	1.00363	5.44482	7.57379	1.27821	3.62771	1.47369	4.60056	5.03858	1	0.201424	Clostridium scindens 2_msp_0109	Lachnoclostridium	Lachnospiraceae	Clostridiales	Clostridia	Firmicutes	Bacteria
msp_0110	0.00378699	0.00204992	0.0646915	23	5.56211e-05	2.74719e-05	7.91711e-06	67.9374	3.1189	5.67501	5.18734	2.91343	3.5349	5.66213	6.38314	5.72565	NA	6.23367	4.6353	6.28954	1.65983	1.16621	4.64031	4.15088	3.30848	1.43958	4.64244	6.73696	2.53085	5.00928	2.44893	5.04473	4.9814	1	0.437735	Bilophila wadsworthia_msp_0110	Bilophila	Desulfovibrionaceae	Desulfovibrionales	Deltaproteobacteria	Proteobacteria	Bacteria
msp_0111	0.00143718	0.000897121	0.109157	22	4.88229e-06	4.45097e-06	0.0677428	35.5942	1.55265	2.50426	3.61531	0.459339	1.98855	1.75785	4.02907	3.69058	NA	4.12854	8.04538	12.7866	0.399809	0.412767	9.86578	3.76318	11.3216	2.22419	9.20831	6.63688	NA	5.28251	0.175956	3.21481	4.48872	1	0.531806	Coprococcus sp. HPP0074 _msp_0111	Coprococcus	Lachnospiraceae	Clostridiales	Clostridia	Firmicutes	Bacteria
msp_0112	0.000496646	0.000333499	0.136436	22	9.15555e-07	6.29505e-07	0.0130258	54.5059	2.19809	2.92718	4.68403	6.83797	6.66732	3.63733	10.5303	7.07734	NA	9.24382	10.7055	9.45482	0.521815	NA	3.13578	4.29406	2.44069	0.610003	1.67143	6.92418	0.662772	1.77945	0.671988	2.52692	2.9953	1	0.581616	Blautia hydrogenotrophica_msp_0112	Blautia	Lachnospiraceae	Clostridiales	Clostridia	Firmicutes	Bacteria
msp_0113	0.000345399	0.000416149	0.406545	23	1.71474e-06	1.03404e-06	0.00569482	61.4502	2.59405	2.88688	4.29063	1.2443	1.91407	2.58971	7.39347	6.4799	NA	5.65279	7.86852	8.97996	1.26579	0.22822	5.01344	8.36005	9.2183	5.3373	3.28906	6.39992	0.735893	3.81142	0.74846	2.0627	4.22921	1	0.808534	Blautia producta 2_msp_0113	Blautia	Lachnospiraceae	Clostridiales	Clostridia	Firmicutes	Bacteria
msp_0114	-0.000234707	0.00134637	0.86161	21	8.39603e-06	9.79885e-06	0.102578	25.9917	1.3512	10.2608	4.10838	5.29098	1.2096	4.16477	1.62188	5.27329	NA	7.47264	0.450817	6.55529	0.727691	NA	3.67408	1.7113	3.71804	0.461239	5.59801	11.7629	NA	8.72381	1.22297	13.9018	2.08966	1	0.975143	Bacteroides coprophilus_msp_0114	Bacteroides	Bacteroidaceae	Bacteroidales	Bacteroidia	Bacteroidetes	Bacteria
msp_0115c	4.35041e-05	0.000194842	0.823319	4	7.18218e-08	1.13206e-07	0.423926	71.2646	3.48002	NA	NA	NA	NA	44.7953	48.1591	NA	NA	6.94585	NA	NA	NA	0.0997275	NA	NA	NA	NA	NA	NA	NA	NA	NA	NA	NA	1	0.966622	Lachnoclostridium phytofermentans 2_msp_0115c	Lachnoclostridium	Lachnospiraceae	Clostridiales	Clostridia	Firmicutes	Bacteria
msp_0116	4.65062e-05	8.14205e-05	0.567874	15	0	2.36316e-08	0.819655	0	1	15.8687	NA	NA	NA	NA	22.2754	NA	NA	15.431	NA	1.28227	NA	NA	0.603766	0.121784	0.25466	0.101524	0.253741	37.8053	0.252156	0.708499	0.085414	0.68148	4.2743	1	0.900426	unclassified_msp_0116	unclassified	unclassified	unclassified	unclassified	unclassified	unclassified
msp_0117	-0.000158427	0.000417807	0.704548	22	1.03597e-06	9.73109e-07	0.407474	36.819	1.58275	9.75726	6.23395	4.01772	1.12501	6.67276	7.6391	3.04384	NA	7.65096	3.1354	5.27556	0.723824	NA	3.06807	0.953233	1.85908	0.374449	2.50625	15.2764	7.85982	2.88648	0.980814	2.83916	6.12081	1	0.936329	unclassified Butyricimonas_msp_0117	Butyricimonas	Odoribacteraceae	Bacteroidales	Bacteroidia	Bacteroidetes	Bacteria
msp_0118	-0.000322213	0.000279662	0.249259	17	2.13535e-07	3.67342e-07	0.211333	17.8816	1.21775	0.874176	15.117	NA	8.20917	NA	17.6248	NA	NA	9.59116	7.48883	3.18892	NA	NA	7.1569	0.586312	0.423811	0.161574	1.74646	13.2926	NA	2.40266	0.861156	7.11624	4.15824	1	0.707423	unclassified Bacteroides_msp_0118	Bacteroides	Bacteroidaceae	Bacteroidales	Bacteroidia	Bacteroidetes	Bacteria
msp_0119	5.86471e-05	9.05392e-05	0.517144	16	0	3.39637e-08	0.446816	0	1	14.4939	NA	0.204699	2.09065	39.3353	1.87972	4.12279	NA	3.29628	NA	12.5722	0.0414564	NA	NA	0.899061	NA	NA	7.96994	4.84848	NA	5.36917	0.431413	0.616788	1.82807	1	0.889367	unclassified Firmicutes_msp_0119	unclassified Firmicutes	unclassified Firmicutes	unclassified Firmicutes	unclassified Firmicutes	Firmicutes	Bacteria
msp_0120	-2.92119e-05	6.94816e-05	0.674174	20	0	2.17692e-08	0.218149	0	1	6.11902	7.13007	NA	0.215742	2.02885	5.54661	10.4425	NA	3.04645	3.08283	0.630622	0.239181	NA	0.298306	0.459576	0.249258	0.521271	0.718179	58.126	0.0237889	0.331739	0.54752	0.24249	NA	1	0.930503	unclassified_msp_0120	unclassified	unclassified	unclassified	unclassified	unclassified	unclassified
msp_0121	-0.000316596	0.00180768	0.86097	23	1.71685e-05	1.95355e-05	0.162919	25.5963	1.34402	5.42109	3.53937	5.41333	2.39668	5.58727	8.75055	5.07106	NA	8.78061	3.67664	7.41459	1.2837	0.549061	5.03582	2.38516	2.03229	0.342578	3.9087	11.7437	1.06538	4.62161	2.4242	5.47001	3.08655	1	0.975143	unclassified Oscillibacter_msp_0121	Oscillibacter	Oscillospiraceae	Clostridiales	Clostridia	Firmicutes	Bacteria
msp_0122	-3.9178e-05	8.55266e-05	0.646895	14	0	2.58024e-08	0.0448246	0	1	NA	0.395907	0.246908	0.0475623	0.212206	1.0446	1.12342	NA	0.420639	1.31746	25.6791	NA	NA	13.2705	NA	1.43772	0.0820114	NA	46.8958	NA	NA	NA	7.82616	NA	1	0.9275	unclassified Bacteroides_msp_0122	Bacteroides	Bacteroidaceae	Bacteroidales	Bacteroidia	Bacteroidetes	Bacteria
msp_0123	0.0026923	0.00154067	0.0805537	19	1.39686e-05	1.24253e-05	0.0563741	41.5853	1.7119	15.1033	5.82023	4.99737	2.65178	3.28933	5.8468	9.2676	NA	7.11351	0.163346	10.4023	0.633247	NA	8.29714	0.872063	5.38143	2.03036	7.54335	8.95523	0.443707	NA	NA	NA	1.18795	1	0.465893	Prevotella sp. CAG:520_msp_0123	Prevotella	Prevotellaceae	Bacteroidales	Bacteroidia	Bacteroidetes	Bacteria
msp_0124	-0.00895857	0.00374275	0.016685	23	0.000144137	8.94426e-05	0.00215136	52.1096	2.0881	5.39335	5.11838	2.48087	2.3296	5.19908	7.21717	5.15567	NA	6.82338	4.15817	7.25416	2.0953	1.05284	5.98277	4.393	3.69038	0.930425	4.81282	7.61034	2.26524	4.66946	1.43892	5.09961	4.82908	1	0.221496	unclassified Ruminococcaceae_msp_0124	unclassified Ruminococcaceae	Ruminococcaceae	Clostridiales	Clostridia	Firmicutes	Bacteria
msp_0125	-0.00546145	0.00183408	0.00290363	23	2.89114e-05	2.11449e-05	0.0921313	43.1318	1.75845	5.22308	5.01543	2.34076	2.92843	5.9745	7.41131	6.13461	NA	7.21983	3.39231	7.95946	1.96531	0.788443	6.47483	2.93742	3.88741	0.894132	3.99774	8.34557	2.46147	4.3232	1.61542	4.16869	4.54066	1	0.0811444	Firmicutes bacterium CAG:24 _msp_0125	unclassified Clostridiales	unclassified Clostridiales	Clostridiales	Clostridia	Firmicutes	Bacteria
msp_0126	0.0110117	0.0028239	9.64062e-05	23	8.36243e-05	5.02872e-05	0.00113639	54.6343	2.20431	5.03306	5.35169	3.47497	2.40346	5.77494	7.32438	6.14668	NA	6.93503	3.04101	7.21496	0.801632	0.272327	5.61438	4.13154	3.3425	0.728603	5.22518	7.84104	2.34301	4.4597	2.83207	4.0863	5.62153	0.190692	0.00869717	Ruminococcus torques_msp_0126	Blautia	Lachnospiraceae	Clostridiales	Clostridia	Firmicutes	Bacteria
msp_0127	-0.000828054	0.000362228	0.0222541	22	0	4.82048e-07	0.3705	0	1	0.861677	1.85757	9.40704	0.593085	28.019	1.73807	0.630763	NA	2.80256	0.296116	1.57571	NA	0.0268969	0.384115	0.288337	0.345314	0.0842876	0.686526	25.692	0.452212	0.435528	0.0576203	0.607258	23.1583	1	0.265173	Ruminococcus sp. CAG:353 _msp_0127	Ruminococcus	Ruminococcaceae	Clostridiales	Clostridia	Firmicutes	Bacteria
msp_0128	0.00167167	0.000961261	0.0820289	22	5.2195e-06	5.49937e-06	0.228415	28.6044	1.40065	7.77366	4.63735	1.94618	2.44894	5.65227	7.75288	5.97558	NA	7.70381	4.30573	8.40089	0.654727	NA	5.04257	2.40646	3.38903	0.506997	4.26092	10.7028	1.31317	4.29764	1.17617	3.61451	6.03773	1	0.469112	Butyricimonas virosa_msp_0128	Butyricimonas	Odoribacteraceae	Bacteroidales	Bacteroidia	Bacteroidetes	Bacteria
msp_0129	0.00339337	0.00155698	0.0292978	23	3.20629e-05	1.57766e-05	7.47817e-05	68.622	3.18694	4.99772	5.0812	4.86764	3.81584	5.40524	6.66574	5.25847	NA	6.4056	5.2779	6.37671	2.0173	0.304014	5.34795	4.09606	3.57501	0.949997	3.91718	6.76001	2.45709	4.66189	2.67234	4.34574	4.74335	1	0.309899	Clostridium sp. CAG:58_msp_0129	unclassified Clostridiales	unclassified Clostridiales	Clostridiales	Clostridia	Firmicutes	Bacteria
msp_0130	-0.000510543	0.000643379	0.427466	22	1.58978e-06	1.9149e-06	0.0282159	23.7382	1.31127	1.29569	12.5535	NA	2.75275	16.9861	5.68305	5.60624	NA	16.0223	7.1594	2.23309	0.24943	0.0962808	1.5714	0.670894	0.414099	0.116095	4.93813	16.1042	0.415586	1.18816	0.331844	0.938537	2.67317	1	0.821261	Candidatus Gastranaerophilales bacterium x14_msp_0130	Candidatus Gastranaerophilales	Candidatus Gastranaerophilales	Candidatus Gastranaerophilales	Candidatus Melainabacteria	Candidatus Melainabacteria	Bacteria
msp_0131	0.00236611	0.00337681	0.483494	23	9.9926e-05	7.0635e-05	0.00248219	45.2898	1.82781	7.14152	3.71734	2.8969	2.73123	4.84819	7.26076	5.62385	NA	7.33338	3.58137	8.17208	1.90691	0.24235	5.70629	3.38649	3.65255	0.848802	5.16776	8.73691	2.06273	5.6545	0.721667	4.78679	3.81963	1	0.860802	Phascolarctobacterium sp. CAG:207_msp_0131	Phascolarctobacterium	Acidaminococcaceae	Acidaminococcales	Negativicutes	Firmicutes	Bacteria
msp_0132	0.000946545	0.000693179	0.172092	23	4.85086e-06	3.01389e-06	0.738853	55.9404	2.26965	4.89479	5.06491	2.49188	3.58093	2.82955	5.88329	5.60785	NA	6.53826	8.72481	8.33675	2.27394	0.0468907	5.04986	3.55936	4.27765	1.507	4.40381	7.93884	1.9839	3.18122	3.9567	1.85573	6.01206	1	0.638645	Coprobacillus cateniformis_msp_0132	Coprobacillus	Erysipelotrichaceae	Erysipelotrichales	Erysipelotrichia	Firmicutes	Bacteria
msp_0133	-0.004376	0.00178381	0.0141598	22	2.66256e-05	1.95211e-05	0.0151045	44.9919	1.81791	5.33277	5.23856	3.76487	2.83598	5.0252	4.88656	4.15234	NA	6.60606	6.3025	6.85784	2.29226	NA	4.38368	4.40334	2.02568	0.697177	2.86486	9.66322	2.47518	4.01665	0.296953	7.64165	8.23668	1	0.201424	Coprococcus sp. 2789STDY5608819 _msp_0133	unclassified Lachnospiraceae	Lachnospiraceae	Clostridiales	Clostridia	Firmicutes	Bacteria
msp_0134	-0.000876511	0.00200114	0.661383	21	2.07086e-05	2.0053e-05	0.120883	33.6379	1.50688	4.63686	1.30553	0.467511	0.658057	0.775426	1.17181	1.62334	NA	2.97396	0.376431	12.2166	14.478	NA	3.1984	12.9559	11.4322	0.289778	4.03568	6.29599	0.845368	8.95325	NA	8.2541	3.05582	1	0.930503	Megamonas funiformis == rupellensis_msp_0134	Megamonas	Selenomonadaceae	Selenomonadales	Negativicutes	Firmicutes	Bacteria
msp_0135	0.000508517	0.000630158	0.419685	13	4.09614e-06	1.96287e-06	0.122448	98.8155	84.4239	6.34375	NA	9.34361	NA	9.43053	NA	9.66963	NA	9.06566	NA	9.67803	0.810938	0.101409	9.34354	NA	8.51715	NA	9.38986	9.66042	NA	NA	NA	8.64546	NA	1	0.819484	Clostridium clostridioforme 2_msp_0135	Lachnoclostridium	Lachnospiraceae	Clostridiales	Clostridia	Firmicutes	Bacteria
msp_0136	3.69601e-05	0.000542382	0.945671	20	1.43808e-06	1.38079e-06	0.325197	42.5914	1.7419	2.37494	NA	5.55638	NA	8.64547	19.5515	12.8702	NA	14.9824	1.11555	3.59128	0.497308	NA	11.8214	0.656396	0.488971	0.161829	2.45345	5.66029	0.370097	3.66567	0.844921	2.20754	2.4845	1	0.985644	Prevotella sp. P4-51 _msp_0136	Prevotella	Prevotellaceae	Bacteroidales	Bacteroidia	Bacteroidetes	Bacteria
msp_0137	-0.00062235	0.000357065	0.0813409	19	0	5.32249e-07	0.691799	0	1	3.25873	4.42081	NA	1.24031	0.638896	16.5814	4.53773	NA	4.36683	0.667335	3.49675	NA	NA	0.448924	1.21161	1.65123	0.644807	1.20482	44.5985	0.213022	9.11424	NA	1.40889	0.295124	1	0.469074	unclassified Prevotella_msp_0137	Prevotella	Prevotellaceae	Bacteroidales	Bacteroidia	Bacteroidetes	Bacteria
msp_0138	-0.00187715	0.00239365	0.43291	23	6.15882e-05	3.66317e-05	0.00706096	59.7869	2.48675	3.54874	3.64142	3.12761	2.0959	4.46295	4.92657	4.89087	NA	5.00354	2.35319	8.44978	3.58024	1.17878	4.093	5.91972	3.95333	1.34371	4.48001	6.91194	1.49844	4.14791	8.26175	6.94146	5.18913	1	0.824949	Bifidobacterium pseudocatenulatum_msp_0138	Bifidobacterium	Bifidobacteriaceae	Bifidobacteriales	Actinobacteria	Actinobacteria	Bacteria
msp_0139	-0.000949385	0.00105264	0.367106	23	7.66257e-06	6.57992e-06	0.0348149	35.7564	1.55658	9.06639	5.37217	4.7912	2.95988	6.9799	8.70639	4.83319	NA	7.8044	3.13607	6.31639	1.06337	0.183968	5.05892	1.86058	2.4545	0.311926	4.00921	10.1402	1.36195	4.29848	0.73782	2.83891	5.71422	1	0.781539	Coprobacter fastidiosus_msp_0139	Coprobacter	Barnesiellaceae	Bacteroidales	Bacteroidia	Bacteroidetes	Bacteria
msp_0140	2.46147e-05	0.00024411	0.919682	17	2.19873e-07	2.6747e-07	0.191703	30.1283	1.4312	0.269923	6.76126	1.13605	NA	0.766146	1.9077	1.67489	NA	16.5336	16.4557	21.7548	NA	NA	7.38399	NA	NA	2.59931	0.921598	2.09938	5.2657	NA	2.61707	7.96692	3.88599	1	0.977649	Klebsiella oxytoca_msp_0140	Klebsiella	Enterobacteriaceae	Enterobacterales	Gammaproteobacteria	Proteobacteria	Bacteria
msp_0141	-0.0010713	0.00263085	0.683855	23	0.000103773	4.57826e-05	2.15226e-08	74.8073	3.9694	4.44593	4.93607	5.09447	3.86976	5.11571	5.78763	4.92426	NA	5.63367	5.12366	6.00489	2.0457	0.261749	4.96416	3.76211	4.18553	1.85547	5.0257	6.03896	3.32014	4.98518	2.47233	4.85336	5.29356	1	0.930503	Blautia massiliensis_msp_0141	Blautia	Lachnospiraceae	Clostridiales	Clostridia	Firmicutes	Bacteria
msp_0142	-0.00122236	0.00167943	0.46671	22	3.65171e-05	1.81232e-05	7.21002e-06	69.9	3.32225	4.42329	4.86008	5.36508	3.36638	4.9223	6.65861	5.01635	NA	6.3173	6.909	6.4947	1.63659	NA	4.65629	3.92965	4.05408	1.01032	4.5532	6.80608	2.48539	4.65395	1.6132	4.84934	5.41884	1	0.852379	Blautia sp. CAG:52 _msp_0142	Blautia	Lachnospiraceae	Clostridiales	Clostridia	Firmicutes	Bacteria
msp_0143	-0.00050758	0.00043915	0.247754	22	1.46639e-07	1.00807e-06	0.353912	3.41346	1.03534	2.70102	2.14832	1.37508	0.966197	4.90002	3.30546	16.0462	NA	9.029	8.20114	10.9049	0.331487	NA	1.33115	0.481299	8.12542	9.64754	2.89404	8.92341	2.13317	3.29193	0.64287	1.49082	1.12947	1	0.707423	Parabacteroides sp. CAG:409_msp_0143	Parabacteroides	Tannerellaceae	Bacteroidales	Bacteroidia	Bacteroidetes	Bacteria
msp_0144	-1.42049e-05	0.0030193	0.996246	22	0.000118886	5.8891e-05	5.30527e-05	69.9285	3.32541	5.0849	4.72766	5.90724	3.55442	5.37868	6.81057	4.95483	NA	6.44274	5.1259	5.80001	3.32533	NA	4.99316	3.04138	3.34865	0.34103	4.76281	7.09669	5.00729	3.92371	1.72599	3.78229	4.86473	1	0.998265	Clostridium sp. CAG:138_msp_0144	unclassified Clostridiales	unclassified Clostridiales	Clostridiales	Clostridia	Firmicutes	Bacteria
msp_0145	-0.00246224	0.00093645	0.00855524	23	9.92095e-07	4.8365e-06	0.37222	4.92969	1.05185	12.5537	4.58963	3.47655	1.26589	5.16022	10.0157	4.90258	NA	7.8636	2.25587	6.58226	0.615607	0.0528722	5.08217	2.38503	1.59061	0.3276	4.2062	14.1958	0.928724	3.57496	1.09978	3.05185	4.22271	1	0.149755	Parasutterella excrementihominis_msp_0145	Parasutterella	Sutterellaceae	Burkholderiales	Betaproteobacteria	Proteobacteria	Bacteria
msp_0146c	0.00068404	0.000574236	0.233569	23	5.23425e-06	2.21073e-06	1.95711e-09	83.7467	6.15259	3.90432	4.46978	4.26396	4.52328	4.41932	5.77711	5.3243	NA	5.58257	5.98129	6.16615	3.34402	1.54421	4.59563	4.03818	3.9497	1.92354	4.20409	5.58405	3.07963	4.07154	2.56337	4.99082	5.69911	1	0.700934	Streptococcus sanguinis_msp_0146c	Streptococcus	Streptococcaceae	Lactobacillales	Bacilli	Firmicutes	Bacteria
msp_0147	0.00188265	0.000606932	0.0019227	22	9.71794e-07	1.88588e-06	0.00336413	13.1614	1.15156	6.85343	1.36433	0.953573	4.21712	1.41984	4.867	11.1735	NA	5.58155	14.4608	17.5395	1.30633	NA	1.77804	3.78286	5.62056	0.0459415	1.50569	4.38436	7.76932	2.34286	0.982702	1.05501	0.995661	1	0.0603667	unclassified_msp_0147	unclassified	unclassified	unclassified	unclassified	unclassified	unclassified
msp_0148c	0.00198907	0.00149447	0.183204	23	3.53246e-05	1.49465e-05	2.67282e-08	76.5867	4.27107	5.04831	5.11665	2.08086	3.24023	5.02105	4.60032	4.74543	NA	5.57351	5.41742	5.48132	2.5684	0.87523	5.34115	4.77874	5.09486	2.92974	5.0406	5.39411	4.07805	4.58496	2.94557	4.88162	5.16188	1	0.650535	Veillonella dispar_msp_0148c	Veillonella	Veillonellaceae	Veillonellales	Negativicutes	Firmicutes	Bacteria
msp_0149	-6.48489e-05	0.000671783	0.923098	12	2.42243e-06	2.01176e-06	0.0330921	72.4711	3.63254	NA	3.07113	2.77942	1.3056	5.21403	9.2228	10.8791	NA	5.49838	9.237	NA	NA	NA	NA	16.5664	14.8767	3.01557	NA	18.3338	NA	NA	NA	NA	NA	1	0.977649	unclassified Bacteroides_msp_0149	Bacteroides	Bacteroidaceae	Bacteroidales	Bacteroidia	Bacteroidetes	Bacteria
msp_0150c	6.19888e-05	5.24132e-05	0.236931	16	0	1.07811e-08	0.952058	0	1	0.993276	0.808	NA	NA	3.48538	20.5573	7.04075	NA	34.7934	NA	13.8611	0.25854	NA	2.01557	1.25866	NA	0.376241	3.70257	9.26039	NA	0.478211	0.283764	0.826862	NA	1	0.700934	Clostridium methylpentosum_msp_0150c	Ruminiclostridium	Ruminococcaceae	Clostridiales	Clostridia	Firmicutes	Bacteria
msp_0151	-0.000323866	0.00105434	0.75871	22	1.19445e-05	6.934e-06	0.00351227	58.4305	2.40561	7.29353	5.72517	2.91586	2.90495	7.03291	6.96403	6.04263	NA	7.09401	4.16969	7.01602	1.14939	NA	5.09963	3.08016	3.47889	1.00151	4.22321	7.41875	1.98468	4.91049	1.13702	4.47123	4.88626	1	0.957044	Butyricimonas synergistica 2_msp_0151	Butyricimonas	Odoribacteraceae	Bacteroidales	Bacteroidia	Bacteroidetes	Bacteria
msp_0152	-0.00163059	0.00343361	0.634866	23	0.000147471	7.67075e-05	2.34218e-05	63.1735	2.71544	4.73363	4.73022	4.23486	3.5955	5.44711	6.1471	5.10555	NA	6.27287	4.38747	6.46072	1.91291	0.313624	5.68933	4.10214	4.08848	0.918274	4.99042	7.01097	2.31264	4.60432	2.65408	5.00078	5.28702	1	0.926509	Ruminococcus faecis_msp_0152	Ruminococcus	Ruminococcaceae	Clostridiales	Clostridia	Firmicutes	Bacteria
msp_0153	0.00514845	0.00182236	0.00472588	23	4.57862e-05	2.16533e-05	8.4769e-08	75.0436	4.00699	3.54295	4.43932	3.6808	3.46194	4.20751	5.26372	5.39727	NA	5.2025	6.98079	6.79913	0.929066	0.270166	4.78627	4.91271	4.76982	1.3992	5.67617	6.04094	3.45864	4.74454	5.24662	3.45585	5.33409	1	0.102723	Erysipelatoclostridium ramosum_msp_0153	Erysipelatoclostridium	Erysipelotrichaceae	Erysipelotrichales	Erysipelotrichia	Firmicutes	Bacteria
msp_0154	-0.0050872	0.00378178	0.178564	23	0.000234135	9.6217e-05	1.25274e-09	79.6028	4.90263	4.40897	4.64398	4.35349	4.05666	4.92407	5.39586	5.26435	NA	5.15299	4.4251	5.62622	3.11154	0.868743	4.96292	4.3509	4.01061	1.86364	4.66606	5.67148	3.31774	5.2159	3.66335	4.89863	5.14679	1	0.645704	Fusicatenibacter saccharivorans_msp_0154	Fusicatenibacter	Lachnospiraceae	Clostridiales	Clostridia	Firmicutes	Bacteria
msp_0155	-0.000166667	0.000200027	0.404719	10	6.74138e-09	1.38634e-07	0.390013	1.12554	1.01138	NA	0.584516	0.449246	0.337792	1.41215	6.02634	57.6611	NA	1.17325	1.95917	NA	NA	NA	NA	NA	NA	1.26861	NA	NA	NA	29.1278	NA	NA	NA	1	0.808534	unclassified Parabacteroides_msp_0155	Parabacteroides	Tannerellaceae	Bacteroidales	Bacteroidia	Bacteroidetes	Bacteria
msp_0156	0.000237664	0.000182725	0.193372	15	0	1.39227e-07	0.553008	0	1	NA	0.818064	0.560841	0.493212	1.46326	1.09128	2.70111	NA	1.38644	0.698344	NA	NA	NA	12.2322	3.66193	NA	NA	18.6406	23.0956	NA	12.9655	NA	13.339	6.85276	1	0.660606	unclassified Parabacteroides_msp_0156	Parabacteroides	Tannerellaceae	Bacteroidales	Bacteroidia	Bacteroidetes	Bacteria
msp_0157	0.000372562	0.000271536	0.170047	14	0	4.449e-07	0.250136	0	1	75.5028	0.832571	0.15022	7.0611	0.201232	1.97878	0.806522	NA	2.22433	4.88006	NA	NA	NA	3.70979	NA	NA	NA	0.0159189	1.84317	NA	NA	NA	0.482609	0.310903	1	0.635566	Klebsiella aerogenes_msp_0157	Klebsiella	Enterobacteriaceae	Enterobacterales	Gammaproteobacteria	Proteobacteria	Bacteria
msp_0158	-0.00541556	0.00127013	2.00995e-05	23	7.66e-06	9.45542e-06	0.0455058	22.9477	1.29782	6.79248	4.98629	2.47785	0.910469	4.06424	2.72132	3.89876	NA	6.43434	4.83388	8.37618	0.985903	0.452002	5.30696	5.49733	4.30891	0.258802	5.76551	11.2041	0.131454	10.6762	1.68324	4.06834	4.16546	0.0397568	0.00361425	Eubacterium sp. CAG:252_msp_0158	Eubacterium	Eubacteriaceae	Clostridiales	Clostridia	Firmicutes	Bacteria
msp_0159	-7.52959e-05	0.000183046	0.680816	22	8.20581e-08	1.72581e-07	0.25108	11.9479	1.13569	9.61044	8.88472	6.66827	2.10087	7.32513	9.9451	5.23472	NA	6.76148	1.20983	2.52775	1.63215	NA	1.61358	0.43118	0.725675	0.111438	1.68815	11.2959	0.820817	16.1214	0.238968	1.10595	3.94654	1	0.930503	unclassified_msp_0159	unclassified	unclassified	unclassified	unclassified	unclassified	unclassified
msp_0160	0.00202382	0.00164728	0.219228	22	1.73892e-05	1.55845e-05	0.0443398	35.7004	1.55522	2.14638	3.66621	5.97324	1.79503	4.39031	10.8731	5.2948	NA	8.26145	10.2228	6.03981	1.20907	NA	4.50222	1.99803	1.86134	0.913308	3.33382	8.14385	1.00374	3.34359	1.49518	3.10516	10.4276	1	0.693351	Faecalitalea sp. UBA637_msp_0160	Faecalitalea	Erysipelotrichaceae	Erysipelotrichales	Erysipelotrichia	Firmicutes	Bacteria
msp_0161	-0.00234849	0.00154468	0.128418	22	6.72386e-06	1.38835e-05	0.254462	13.3555	1.15414	10.421	3.82304	1.39524	1.7123	2.02152	4.37935	4.64383	NA	7.02704	5.26929	6.08776	1.59255	NA	4.90434	3.33548	3.7833	0.831543	8.01565	10.9361	1.78099	9.25586	0.383149	2.98899	5.41165	1	0.568938	Eubacterium sp. CAG:248_msp_0161	Eubacterium	Eubacteriaceae	Clostridiales	Clostridia	Firmicutes	Bacteria
msp_0162	0.00065948	0.000319444	0.0389739	22	0	3.67673e-07	0.187295	0	1	0.820239	0.130656	0.103119	0.103563	0.371952	0.440022	0.385083	NA	0.497899	0.311667	34.4607	1.24456	NA	2.10589	2.44375	2.45576	0.133222	1.51145	0.986687	2.46552	1.42699	0.155716	26.7808	20.6648	1	0.352011	unclassified Blautia_msp_0162	Blautia	Lachnospiraceae	Clostridiales	Clostridia	Firmicutes	Bacteria
msp_0163	-0.00274006	0.00135839	0.0436807	22	2.35309e-05	1.19907e-05	0.000125162	65.8188	2.92558	3.81373	3.75245	4.77771	2.24199	4.5529	5.54635	4.53269	NA	5.96218	5.55952	6.77193	2.61389	NA	4.97317	4.5861	4.69854	0.990489	5.89934	6.61972	2.7361	5.73385	3.56218	3.81342	6.26176	1	0.370818	Firmicutes bacterium CAG:227_msp_0163	unclassified Firmicutes	unclassified Firmicutes	unclassified Firmicutes	unclassified Firmicutes	Firmicutes	Bacteria
msp_0164	-0.00430044	0.00214472	0.0449494	23	6.04498e-05	2.99121e-05	0.000347773	68.5421	3.17885	5.0598	5.39544	3.93946	3.20288	5.49539	6.28936	5.52934	NA	6.37483	4.33596	6.32724	2.05534	0.844306	5.59048	3.84067	4.03897	1.11611	4.50715	7.00601	2.56572	4.74079	1.55779	4.84272	5.34424	1	0.371244	Ruminococcus sp. 2789STDY5608794 _msp_0164	Ruminococcus	Ruminococcaceae	Clostridiales	Clostridia	Firmicutes	Bacteria
msp_0165	2.52253e-05	5.29428e-05	0.633745	20	0	9.47445e-09	0.191033	0	1	0.455792	1.60335	NA	NA	7.31465	22.1311	NA	NA	35.0614	1.1031	0.155227	0.151729	0.00818174	0.305885	0.0267627	0.365128	0.255804	1.02253	29.5251	0.0667463	0.0220313	0.00643624	0.0922254	0.326816	1	0.926509	unclassified Lachnospiraceae_msp_0165	unclassified Lachnospiraceae	Lachnospiraceae	Clostridiales	Clostridia	Firmicutes	Bacteria
msp_0166	-0.00116075	0.00323709	0.71991	23	0.000118207	6.74888e-05	0.000817693	56.5276	2.30031	4.67913	4.93501	4.1582	2.7742	5.67297	6.21103	5.31431	NA	6.22996	3.77518	6.78327	1.65034	0.190508	4.7004	3.36841	4.41001	1.73872	5.45326	7.17014	2.02466	5.6866	1.90182	4.94716	6.22468	1	0.945188	Bifidobacterium longum_msp_0166	Bifidobacterium	Bifidobacteriaceae	Bifidobacteriales	Actinobacteria	Actinobacteria	Bacteria
msp_0167c	0.000181187	0.000273722	0.508011	4	2.50826e-08	2.37296e-07	0.372411	7.34845	1.07931	NA	NA	1.46586	NA	21.6791	48.904	NA	NA	27.951	NA	NA	NA	NA	NA	NA	NA	NA	NA	NA	NA	NA	NA	NA	NA	1	0.882993	Plesiomonas shigelloides_msp_0167c	Plesiomonas	unclassified Enterobacterales	Enterobacterales	Gammaproteobacteria	Proteobacteria	Bacteria
msp_0168	-0.000132748	0.000550244	0.809359	22	1.47196e-06	1.41026e-06	0.00347292	35.6385	1.55372	2.92517	2.65	10.278	1.29016	14.1972	11.3655	3.26903	NA	9.102	17.2114	1.71792	0.157876	NA	1.4269	0.542064	0.713323	0.189114	1.86369	15.4437	0.357448	1.08342	0.247811	1.14041	2.82784	1	0.963879	Firmicutes bacterium CAG:194_msp_0168	unclassified Firmicutes	unclassified Firmicutes	unclassified Firmicutes	unclassified Firmicutes	Firmicutes	Bacteria
msp_0169	-0.00073068	0.00104868	0.48595	14	2.78347e-06	4.67937e-06	0.26878	22.5647	1.2914	7.44055	NA	NA	NA	NA	NA	NA	NA	NA	38.5525	7.58607	NA	0.184212	8.09203	1.77993	2.4273	1.42359	11.939	NA	3.0352	2.82221	0.268394	4.67112	9.77792	1	0.86362	Roseburia sp. CAG:197_msp_0169	Roseburia	Lachnospiraceae	Clostridiales	Clostridia	Firmicutes	Bacteria
msp_0170	0.000654122	0.00157865	0.678615	19	1.49393e-05	1.23781e-05	0.140776	67.1149	3.04089	6.485	15.6331	NA	NA	NA	9.32553	6.77129	NA	16.4423	0.36616	6.134	0.642249	NA	4.38008	1.67356	2.95655	0.332338	4.05498	11.4394	1.6093	5.12198	1.32101	4.16587	1.14522	1	0.930503	Azospirillum sp. CAG:239_msp_0170	Azospirillum	Rhodospirillaceae	Rhodospirillales	Alphaproteobacteria	Proteobacteria	Bacteria
msp_0171	5.60613e-05	0.000403567	0.889518	20	5.23579e-07	7.12628e-07	0.185761	23.8025	1.31238	1.95999	0.647953	0.285564	0.543957	0.703744	2.45565	2.82911	NA	1.6723	4.01683	22.5444	0.213428	NA	2.83016	24.2405	7.92736	1.67092	12.2815	5.01401	NA	4.96612	NA	1.12762	2.06879	1	0.977649	Blautia hansenii_msp_0171	Blautia	Lachnospiraceae	Clostridiales	Clostridia	Firmicutes	Bacteria
msp_0172	0.00759302	0.00153167	7.14658e-07	23	1.90933e-05	1.4554e-05	0.0254792	41.4336	1.70746	4.80135	4.9103	3.11912	3.43169	5.06432	6.99294	5.56679	NA	7.44889	3.3394	8.52056	0.545228	0.173116	6.05843	2.82317	3.36772	0.460205	3.99403	9.34495	3.021	4.76311	2.33926	4.99431	4.92011	0.00141359	0.000351218	Ruthenibacterium lactatiformans_msp_0172	Ruthenibacterium	Ruminococcaceae	Clostridiales	Clostridia	Firmicutes	Bacteria
msp_0173	-0.00164703	0.00152333	0.279607	22	2.20026e-05	1.41807e-05	0.0476784	57.7547	2.36713	4.31354	3.14487	8.61392	2.76232	7.10308	9.08825	5.35668	NA	7.353	5.17691	5.60965	1.50204	NA	3.7107	2.77155	2.92868	0.798882	4.32693	9.53681	3.23049	3.9362	1.52731	3.19062	4.01756	1	0.721971	Christensenellaceae bacterium Phil1 _msp_0173	unclassified Christensenellaceae	Christensenellaceae	Clostridiales	Clostridia	Firmicutes	Bacteria
msp_0174	0.000627614	0.000473333	0.184858	20	1.76237e-06	1.16102e-06	0.0356419	78.7522	4.70637	8.3695	1.42133	0.817656	0.799546	1.38207	4.58567	2.40772	NA	2.24863	4.10809	11.546	NA	NA	12.2668	3.14126	12.0076	0.852611	2.25913	4.21964	NA	12.309	0.614355	6.10141	8.54201	1	0.650535	Klebsiella quasipneumoniae_msp_0174	Klebsiella	Enterobacteriaceae	Enterobacterales	Gammaproteobacteria	Proteobacteria	Bacteria
msp_0175	-0.00467563	0.00147671	0.0015442	22	2.51396e-05	1.38355e-05	4.099e-05	65.67	2.91291	6.5836	5.27842	4.39794	2.57362	4.8247	6.31076	5.3325	NA	7.04435	5.20347	6.46673	2.19616	NA	5.56226	3.25613	3.42722	0.954994	4.52239	8.27719	1.63009	4.19729	1.84545	5.35097	4.76378	1	0.050982	Lachnospiraceae bacterium TF01-11 _msp_0175	unclassified Lachnospiraceae	Lachnospiraceae	Clostridiales	Clostridia	Firmicutes	Bacteria
msp_0176	0.000195636	0.000535156	0.714687	17	7.18828e-07	1.3611e-06	0.238471	16.045	1.19111	2.68155	14.0205	NA	NA	5.27486	12.0796	3.06184	NA	11.7863	0.805802	3.02635	NA	NA	10.0475	0.407025	1.84889	0.484498	16.6797	2.76215	6.51904	8.19048	NA	NA	0.323877	1	0.943387	Prevotella sp. P4-65 _msp_0176	Prevotella	Prevotellaceae	Bacteroidales	Bacteroidia	Bacteroidetes	Bacteria
msp_0177	5.87889e-05	0.000249287	0.813566	21	4.01818e-07	3.26093e-07	0.507777	55.3001	2.23714	6.28109	6.04162	5.02834	4.52277	8.83109	NA	15.039	NA	13.4676	NA	5.44278	0.289548	0.0589318	3.95476	1.23248	1.35755	0.29084	2.18694	10.8038	0.607594	2.18204	3.49178	3.5844	5.305	1	0.963879	unclassified Lachnoclostridium_msp_0177	Lachnoclostridium	Lachnospiraceae	Clostridiales	Clostridia	Firmicutes	Bacteria
msp_0178	-0.00482176	0.00128637	0.000178002	22	1.31855e-05	9.86859e-06	0.0414408	43.9135	1.78296	5.37276	7.15137	6.7721	3.14457	6.71126	7.58693	4.10905	NA	8.23372	2.88546	6.28083	2.71342	NA	3.96522	2.63411	2.03031	0.459849	2.54521	9.68246	1.02285	3.05332	0.577175	4.32957	8.73846	0.352089	0.012141	Ruminococcus sp. A254.MGS-254 _msp_0178	Ruminococcus	Ruminococcaceae	Clostridiales	Clostridia	Firmicutes	Bacteria
msp_0179	-0.000472419	0.000383552	0.218063	22	1.7507e-07	8.52414e-07	0.289753	3.17106	1.03275	0.865887	2.88097	4.64575	0.113528	5.52048	2.88672	0.534239	NA	3.71916	1.53347	1.11429	NA	0.0123619	0.856265	0.467449	0.223794	0.0432062	1.05531	71.242	0.41275	0.471133	0.0107019	0.730863	0.659687	1	0.693351	Coprococcus eutactus 1_msp_0179	Coprococcus	Lachnospiraceae	Clostridiales	Clostridia	Firmicutes	Bacteria
msp_0180	0.000309067	0.000218813	0.157812	23	3.15049e-07	2.72928e-07	0.0172649	38.5996	1.62865	1.44846	0.925181	0.618836	4.74225	0.733515	6.81262	7.70169	NA	3.80747	6.47581	12.7788	2.22365	0.00969588	3.50794	11.8568	6.15879	1.66781	3.25193	5.48943	6.47178	1.72098	2.92754	2.59193	6.07712	1	0.61749	Blautia producta_msp_0180	Blautia	Lachnospiraceae	Clostridiales	Clostridia	Firmicutes	Bacteria
msp_0181	-0.000114324	8.2415e-05	0.16539	13	0	7.88525e-08	0.150896	0	1	0.464767	0.255293	NA	NA	NA	NA	NA	NA	NA	NA	4.40831	NA	NA	1.7131	0.850924	0.516828	0.035767	0.461224	89.7009	NA	0.103347	0.207774	0.884775	0.39694	1	0.63033	unclassified Marvinbryantia_msp_0181	Marvinbryantia	Lachnospiraceae	Clostridiales	Clostridia	Firmicutes	Bacteria
msp_0182	0.000232638	0.000236249	0.324763	18	2.47506e-08	2.64332e-07	0.470915	2.38055	1.02439	6.12752	5.20114	5.11069	1.27279	1.26411	19.3161	7.9604	NA	6.00092	NA	6.15507	0.0884973	NA	10.0374	NA	11.0108	0.293352	NA	15.3918	NA	0.966538	2.25532	0.606291	0.941324	1	0.761115	Firmicutes bacterium CAG:424_msp_0182	unclassified Firmicutes	unclassified Firmicutes	unclassified Firmicutes	unclassified Firmicutes	Firmicutes	Bacteria
msp_0183	-0.000225341	0.000269044	0.402277	20	1.47246e-07	2.72688e-07	0.612398	13.2338	1.15252	0.271958	22.8231	6.75193	NA	41.454	2.33139	5.84947	NA	11.1467	NA	0.406211	0.104443	NA	0.521045	0.0399888	0.212779	0.0122635	0.409456	6.61963	0.0293063	0.373402	0.0294177	0.118495	0.495041	1	0.808534	Acetobacter sp. 46_36 _msp_0183	Acetobacter	Acetobacteraceae	Rhodospirillales	Alphaproteobacteria	Proteobacteria	Bacteria
msp_0184	0.000299318	0.000208751	0.151615	16	0	1.87837e-07	0.664037	0	1	NA	2.42462	5.82068	0.595471	0.759006	2.83153	13.8371	NA	0.651175	3.35324	4.28334	NA	NA	5.43331	1.73575	0.556297	0.38387	NA	51.6186	NA	5.29927	NA	0.416706	NA	1	0.607823	Culturomica massiliensis_msp_0184	Culturomica	Odoribacteraceae	Bacteroidales	Bacteroidia	Bacteroidetes	Bacteria
msp_0185	0.000210305	0.000247598	0.395668	18	3.20241e-07	2.97644e-07	0.146848	50.888	2.03616	2.02577	8.43339	NA	8.55593	15.7444	NA	NA	NA	18.4648	NA	5.05774	0.708879	NA	3.63629	2.3977	1.71864	0.296001	2.68936	13.1246	3.19479	2.49735	3.32435	4.56827	3.56178	1	0.803726	unclassified Lachnospiraceae_msp_0185	unclassified Lachnospiraceae	Lachnospiraceae	Clostridiales	Clostridia	Firmicutes	Bacteria
msp_0186	-0.000857319	0.000886793	0.333662	22	7.98659e-06	4.85752e-06	0.000500512	56.111	2.27848	8.2608	3.54522	1.44125	0.634628	2.39442	5.66121	4.01388	NA	5.05942	3.91776	6.63675	3.1459	0.328563	6.3215	7.77936	3.3048	3.36283	6.15038	7.69946	6.49402	6.31294	NA	3.41646	4.11844	1	0.769634	Clostridium sp. CAG:299_msp_0186	unclassified Clostridiales	unclassified Clostridiales	Clostridiales	Clostridia	Firmicutes	Bacteria
msp_0187	-0.000164956	0.000508389	0.745583	19	1.00142e-06	1.10402e-06	0.0808709	33.5666	1.50527	12.0028	1.82167	NA	0.763461	3.51268	22.9638	7.30053	NA	11.9333	NA	2.85862	1.06653	NA	1.40858	1.35844	0.679727	0.0210458	1.08809	18.6521	0.267284	11.8709	0.185183	0.245262	NA	1	0.952538	Bacteroides sp. Marseille-P3166 _msp_0187	Bacteroides	Bacteroidaceae	Bacteroidales	Bacteroidia	Bacteroidetes	Bacteria
msp_0188	-0.00549889	0.00256051	0.0317472	23	8.58398e-05	4.24341e-05	3.98207e-06	67.4422	3.07146	4.47815	5.46808	4.32826	3.86994	5.34069	6.22334	5.63901	NA	6.24879	5.0378	6.51691	1.45853	0.483421	5.19129	3.82573	4.29105	1.21404	4.68451	6.81518	2.77887	4.81479	1.11779	4.64405	5.52978	1	0.323691	bacterium LF-3 _msp_0188	Coprobacillus	Erysipelotrichaceae	Erysipelotrichales	Erysipelotrichia	Firmicutes	Bacteria
msp_0189	-0.0014385	0.00137613	0.295872	22	2.6872e-05	1.23475e-05	1.01902e-05	78.5212	4.65575	4.85785	4.21866	4.7594	2.67649	4.85188	5.50837	4.60545	NA	5.2012	4.5251	6.52055	2.38847	NA	5.12358	4.44128	4.61285	1.04276	4.16086	6.25027	2.18894	4.4948	4.39887	6.82813	6.34424	1	0.730433	Blautia sp. CAG:237_msp_0189	Blautia	Lachnospiraceae	Clostridiales	Clostridia	Firmicutes	Bacteria
msp_0190	0.000180232	0.000702765	0.797594	18	5.72005e-06	2.85118e-06	0.668223	88.1575	8.44418	5.66082	NA	7.97033	NA	7.80353	8.55329	6.03233	NA	8.03118	7.32883	4.71959	5.17719	NA	6.07699	2.45666	1.91727	0.244088	4.68977	8.35917	NA	5.79095	NA	4.21681	4.97121	1	0.963528	Bacteroides sp. CAG:530_msp_0190	Bacteroides	Bacteroidaceae	Bacteroidales	Bacteroidia	Bacteroidetes	Bacteria
msp_0191	-0.000476071	0.000314859	0.130531	19	3.849e-07	4.985e-07	0.195372	24.6871	1.32779	5.67457	7.65918	NA	1.32676	6.94188	4.10631	4.17253	NA	10.3432	2.30324	6.60517	0.236216	NA	2.70327	3.2936	13.7098	1.27164	1.50903	7.90491	NA	18.1917	NA	1.25051	0.796503	1	0.568938	unclassified Butyricimonas_msp_0191	Butyricimonas	Odoribacteraceae	Bacteroidales	Bacteroidia	Bacteroidetes	Bacteria
msp_0192	-0.000604483	0.000525288	0.249829	21	2.04021e-07	1.20104e-06	0.342498	3.38707	1.03506	1.5747	4.93085	NA	2.37624	7.10802	19.4451	4.37372	NA	8.17433	1.91428	1.59773	3.20503	NA	0.970538	0.432523	0.388095	0.105892	1.40813	25.7085	0.302546	0.917648	0.108116	1.33182	13.6262	1	0.707423	unclassified Clostridiales_msp_0192	unclassified Clostridiales	unclassified Clostridiales	Clostridiales	Clostridia	Firmicutes	Bacteria
msp_0193	0.000269976	0.000165008	0.101809	22	0	1.18074e-07	0.420434	0	1	0.752419	1.51019	0.338494	NA	2.34472	13.3944	20.5454	NA	7.10624	10.7793	23.6617	0.722385	0.120647	2.28204	4.71841	1.75031	0.184631	0.608708	3.31848	0.224896	3.39533	0.381713	0.701203	1.15847	1	0.517683	Clostridium scindens 1_msp_0193	Lachnoclostridium	Lachnospiraceae	Clostridiales	Clostridia	Firmicutes	Bacteria
msp_0194	-0.00472218	0.00128298	0.000232664	23	1.01368e-05	9.65455e-06	0.0514205	32.3913	1.4791	3.58972	8.37148	4.39339	2.18745	5.98919	8.36324	5.19834	NA	8.67745	4.6122	6.88828	0.811401	0.384046	5.10667	2.05564	2.20427	0.542385	3.13171	12.5568	2.05533	3.46913	0.660806	4.30004	4.45103	0.460209	0.0143815	Clostridium sp. 42_12 _msp_0194	unclassified Clostridiales	unclassified Clostridiales	Clostridiales	Clostridia	Firmicutes	Bacteria
msp_0195	0.000688614	0.00113105	0.54264	22	6.70569e-06	7.21764e-06	0.347419	28.2586	1.3939	7.63015	3.51583	2.45613	1.70988	4.54811	9.34267	7.33536	NA	7.76619	2.68892	6.45697	0.724154	NA	2.73232	2.4617	2.82921	0.840363	3.66853	11.8524	1.49608	3.66538	1.06301	2.87422	12.3425	1	0.891291	Desulfovibrio piger_msp_0195	Desulfovibrio	Desulfovibrionaceae	Desulfovibrionales	Deltaproteobacteria	Proteobacteria	Bacteria
msp_0196	0.00122438	0.00247689	0.621078	22	6.0662e-05	3.86148e-05	0.00233364	51.5822	2.06536	6.20509	5.13157	3.27604	4.14327	5.34266	7.14424	6.05974	NA	7.12445	4.59673	7.05056	1.03634	NA	5.41047	3.98767	3.18375	0.895651	4.16032	7.96299	2.26457	4.64907	1.27573	3.84109	5.258	1	0.921641	Alistipes shahii_msp_0196	Alistipes	Rikenellaceae	Bacteroidales	Bacteroidia	Bacteroidetes	Bacteria
msp_0197	-0.000238767	0.000277447	0.389467	18	0	3.94203e-07	0.650888	0	1	5.07002	0.0549447	0.0333955	0.0431364	0.04007	0.0892512	0.172888	NA	0.144424	0.0602317	6.27788	NA	NA	1.91961	NA	NA	2.5544	2.91258	0.661317	NA	2.12238	0.356893	8.70918	68.7774	1	0.796656	Megasphaera sp. BL7 _msp_0197	Megasphaera	Veillonellaceae	Selenomonadales	Negativicutes	Firmicutes	Bacteria
msp_0198	-0.000455334	0.000481659	0.344482	22	1.86916e-06	1.39566e-06	0.0194651	42.6593	1.74396	8.36322	7.11758	5.62271	1.97826	5.82708	7.14922	5.04538	NA	7.36375	5.60504	5.75905	0.822474	NA	4.51214	1.8949	2.28441	0.35631	3.7261	8.30932	1.09469	4.97799	1.08231	3.46959	7.63845	1	0.778727	Coprobacter secundus == Gabonia massiliensis_msp_0198	Coprobacter	Barnesiellaceae	Bacteroidales	Bacteroidia	Bacteroidetes	Bacteria
msp_0199	0.000174748	0.00155264	0.910388	22	1.3823e-05	1.36056e-05	0.103642	30.7157	1.44333	3.99392	7.5778	3.3831	2.48509	5.54731	6.12351	5.49611	NA	8.28639	0.780898	5.98362	0.310321	NA	3.89953	1.14455	1.03423	0.271963	3.97963	9.24001	0.353266	8.04985	1.79809	8.67985	11.5809	1	0.977649	Bacteroidales bacterium H8 _msp_0199	Prevotella	Prevotellaceae	Bacteroidales	Bacteroidia	Bacteroidetes	Bacteria
msp_0200	0.00121408	0.000446243	0.00651509	23	2.05349e-06	1.22559e-06	0.00233517	70.2891	3.36577	3.79115	3.72469	1.60351	4.70289	3.27512	4.6354	4.66383	NA	5.11192	9.52683	8.94666	1.36748	0.0208576	4.61087	8.20546	7.38423	1.72674	6.13367	5.81241	1.65163	3.60663	3.06781	2.03411	4.3961	1	0.125115	Anaerostipes caccae_msp_0200	Anaerostipes	Lachnospiraceae	Clostridiales	Clostridia	Firmicutes	Bacteria
msp_0201	-0.000215606	0.000192775	0.263383	14	0	1.3934e-07	0.443805	0	1	0.275474	NA	NA	NA	NA	NA	23.8902	NA	60.8527	NA	2.34537	NA	NA	1.03487	0.628364	0.136797	NA	5.41095	4.59104	0.188173	0.327112	0.0406349	0.225024	0.053261	1	0.719022	Akkermansia sp. KLE1605_msp_0201	Akkermansia	Akkermansiaceae	Verrucomicrobiales	Verrucomicrobiae	Verrucomicrobia	Bacteria
msp_0202	-0.00136162	0.0014194	0.337413	22	1.72723e-05	1.2203e-05	0.018183	47.5866	1.90791	7.67028	5.46865	2.4832	2.61001	8.90312	6.2636	4.69324	NA	7.49892	1.59461	7.7779	0.80944	NA	5.40044	3.02511	3.02681	1.39988	3.26167	9.22135	1.88288	6.05041	3.6827	5.00156	2.27424	1	0.773351	Acinetobacter sp. N54.MGS-139 _msp_0202	Acinetobacter	Moraxellaceae	Pseudomonadales	Gammaproteobacteria	Proteobacteria	Bacteria
msp_0203	0.000332986	0.000917922	0.716784	22	7.64886e-06	5.27023e-06	0.0102	47.725	1.91296	7.53046	3.29438	4.00001	1.76782	3.72646	7.5883	8.35946	NA	6.36069	3.99863	7.74176	0.848848	NA	4.58197	3.65271	5.18348	1.10023	3.57648	6.72956	2.88718	5.02058	3.15195	4.21115	4.68789	1	0.944569	Negativibacillus massiliensis_msp_0203	Negativibacillus	Ruminococcaceae	Clostridiales	Clostridia	Firmicutes	Bacteria
msp_0204	0.000462807	0.000336542	0.169075	20	4.45334e-07	5.0872e-07	0.0971759	30.3506	1.43576	1.64929	0.739473	0.892138	17.508	3.17147	2.75678	1.8192	NA	6.31729	8.2916	6.1423	0.695734	NA	0.871242	NA	18.4173	0.135448	1.58965	3.19575	4.13645	20.0944	NA	0.571898	1.00466	1	0.635566	Clostridia bacterium UC5.1-1D10 _msp_0204	unclassified Clostridia	unclassified Clostridia	unclassified Clostridia	Clostridia	Firmicutes	Bacteria
msp_0205	0.000671684	0.0023219	0.772366	22	5.4659e-05	3.37002e-05	0.00185793	56.6785	2.30832	5.89143	5.13069	6.61952	2.48028	5.66241	7.7529	6.12467	NA	7.34501	4.61202	6.08277	1.0866	NA	4.41217	3.01262	2.78952	0.954878	3.81036	8.87133	2.87998	4.35066	1.86888	4.12083	4.14048	1	0.960102	Firmicutes bacterium CAG:124_msp_0205	unclassified Firmicutes	unclassified Firmicutes	unclassified Firmicutes	unclassified Firmicutes	Firmicutes	Bacteria
msp_0206	8.96181e-06	0.000180855	0.960479	22	0	1.13238e-07	0.104255	0	1	0.0431591	1.3857	1.94372	8.8752	55.7336	0.102154	0.0754562	NA	3.23738	0.132315	0.0545182	0.00189352	NA	0.0139418	0.0159527	0.0219715	0.000844604	0.0502473	28.2159	0.0159566	0.0360842	0.00509691	0.0162617	0.0226146	1	0.989271	Butyrivibrio crossotus_msp_0206	Butyrivibrio	Lachnospiraceae	Clostridiales	Clostridia	Firmicutes	Bacteria
msp_0207	-0.000255686	0.000919393	0.780934	21	5.9293e-06	4.9881e-06	0.0422359	39.0255	1.64003	8.74914	4.36794	5.98541	2.84715	7.51464	8.85322	3.09237	NA	8.01728	1.98254	7.54783	NA	NA	3.82243	3.09581	3.6149	0.28707	3.82667	10.1876	3.63189	4.44578	1.52625	4.87938	1.72468	1	0.960102	Roseburia sp. CAG:380_msp_0207	Roseburia	Lachnospiraceae	Clostridiales	Clostridia	Firmicutes	Bacteria
msp_0208	-0.000517905	0.00189002	0.784068	23	4.77734e-05	2.33583e-05	7.31276e-09	67.3409	3.06194	4.35443	5.16278	4.46827	3.34835	5.29144	6.06579	5.35522	NA	5.98919	3.96026	6.30587	1.95673	0.188235	5.56696	4.35715	4.50716	1.25246	5.14385	6.58663	2.61122	4.70928	2.73402	4.56562	5.51909	1	0.960102	Ruminococcus sp. Marseille-P328 _msp_0208	Blautia	Lachnospiraceae	Clostridiales	Clostridia	Firmicutes	Bacteria
msp_0209	0.000541884	0.00067717	0.423585	15	3.86684e-06	2.37981e-06	0.00634428	80.0538	5.01349	11.5867	3.54537	2.72545	3.30402	8.00943	2.03604	3.31423	NA	6.10291	3.66774	NA	NA	NA	10.6417	NA	NA	NA	8.06732	6.32712	9.32126	NA	NA	10.6193	10.7315	1	0.821261	Enterobacter cloacae complex 'Hoffmann cluster IV'_msp_0209	Enterobacter	Enterobacteriaceae	Enterobacterales	Gammaproteobacteria	Proteobacteria	Bacteria
msp_0210	-0.0004082	0.000414497	0.324719	21	0	6.87398e-07	0.440473	0	1	1.52144	3.45928	NA	17.4272	4.02385	34.6918	18.3397	NA	5.75907	NA	4.15773	0.147675	0.318473	0.993612	0.71532	0.393661	0.0835026	0.670903	3.79446	0.433405	1.19939	0.146109	0.747505	0.976027	1	0.761115	unclassified Clostridiales_msp_0210	unclassified Clostridiales	unclassified Clostridiales	Clostridiales	Clostridia	Firmicutes	Bacteria
msp_0211	7.99963e-05	0.000429609	0.852282	5	0	1.30578e-06	0.791401	0	1	NA	NA	NA	NA	NA	NA	NA	NA	NA	NA	3.57826	NA	NA	1.79433	NA	1.35319	NA	8.98773	NA	NA	84.2865	NA	NA	NA	1	0.972211	Mediterranea massiliensis _msp_0211	Mediterranea	Bacteroidaceae	Bacteroidales	Bacteroidia	Bacteroidetes	Bacteria
msp_0212	0.00103416	0.0030195	0.73198	23	7.62471e-05	5.52789e-05	0.00723157	44.8667	1.81379	4.99237	4.14091	2.25869	6.51889	1.9228	6.71638	4.6908	NA	8.87492	5.16687	9.08363	0.908823	0.360026	5.67971	3.22466	3.69856	0.699085	4.89599	9.11886	1.81986	5.81484	0.951562	5.32268	3.13908	1	0.947934	Dialister invisus_msp_0212	Dialister	Veillonellaceae	Veillonellales	Negativicutes	Firmicutes	Bacteria
msp_0213	0.007427	0.00151109	8.87811e-07	23	9.23892e-06	1.32138e-05	0.0584665	19.367	1.24019	5.87209	4.28775	3.16877	1.21298	6.07205	8.15641	6.0478	NA	9.22736	2.91701	8.28281	1.13672	0.10352	2.92497	3.53704	2.5975	0.42277	2.92739	13.4079	1.44167	2.80592	2.18402	4.28846	6.9771	0.00175609	0.000351218	Flavonifractor plautii_msp_0213	Flavonifractor	unclassified Clostridiales	Clostridiales	Clostridia	Firmicutes	Bacteria
msp_0214	0.000210591	0.000775736	0.786028	22	2.38408e-06	2.80281e-06	0.0862037	27.8042	1.38512	3.32914	2.7969	5.72459	2.20466	11.834	11.1734	23.7596	NA	9.7476	4.51231	1.74197	0.347209	NA	0.978018	0.335169	0.437007	0.552463	0.257923	5.57327	11.4116	2.08963	0.053427	0.964396	0.175737	1	0.960102	Alistipes sp. CAG:268_msp_0214	Alistipes	Rikenellaceae	Bacteroidales	Bacteroidia	Bacteroidetes	Bacteria
msp_0215	-0.00567275	0.00231397	0.0142252	21	5.69869e-05	3.2209e-05	0.000335099	71.7325	3.53763	6.19324	2.48564	2.93726	1.12892	2.99483	6.22484	3.93224	NA	4.58258	1.43515	7.40852	1.39909	NA	7.50554	5.09051	3.75006	2.97566	4.98863	8.63247	5.90891	8.57165	NA	8.92156	2.93272	1	0.201424	Dialister sp. CAG:357_msp_0215	Dialister	Veillonellaceae	Veillonellales	Negativicutes	Firmicutes	Bacteria
msp_0216	0.000851945	0.000522778	0.103176	9	0	1.08296e-06	0.945051	0	1	17.0165	NA	NA	NA	NA	NA	NA	NA	NA	NA	48.8018	NA	NA	NA	NA	NA	6.80899	8.95113	6.82879	5.43961	3.3515	2.59153	NA	0.210236	1	0.520061	Odoribacter laneus_msp_0216	Odoribacter	Odoribacteraceae	Bacteroidales	Bacteroidia	Bacteroidetes	Bacteria
msp_0217	-6.78905e-05	0.000542312	0.900376	14	1.21424e-06	1.32276e-06	0.287611	38.6627	1.63033	17.8331	8.73898	NA	0.687767	18.9453	1.68652	NA	NA	9.8465	NA	2.48489	NA	NA	6.35861	3.12298	0.725345	8.36457	10.1018	10.3161	NA	NA	0.787494	NA	NA	1	0.977649	Bacteroides sp. Marseille-P3108 _msp_0217	Bacteroides	Bacteroidaceae	Bacteroidales	Bacteroidia	Bacteroidetes	Bacteria
msp_0218	2.81753e-05	0.000187212	0.88037	20	2.42114e-07	1.73065e-07	0.163848	63.7581	2.75924	1.60643	4.22638	NA	5.80819	10.4849	11.2127	13.7155	NA	9.14619	2.40368	2.28282	NA	NA	1.87065	0.60479	0.415167	0.39601	3.12416	12.6706	5.15352	0.571597	0.0702329	1.30091	12.9355	1	0.977649	unclassified_msp_0218	unclassified	unclassified	unclassified	unclassified	unclassified	unclassified
msp_0219	1.53406e-05	0.000137857	0.911395	10	1.8509e-08	7.4096e-08	0.558069	8.15202	1.08876	NA	1.60857	2.94014	0.89694	4.79881	55.3789	NA	NA	0.81085	NA	NA	NA	NA	10.1769	NA	NA	NA	NA	NA	NA	19.4643	NA	1.4795	2.44505	1	0.977649	unclassified Bacteroides_msp_0219	Bacteroides	Bacteroidaceae	Bacteroidales	Bacteroidia	Bacteroidetes	Bacteria
msp_0220	-0.000930897	0.000439346	0.0341055	23	0	8.79546e-07	0.294643	0	1	0.77601	56.6789	2.82419	0.25883	8.24537	3.1836	0.916634	NA	9.6135	0.268429	1.36868	0.0831701	0.279405	1.10477	0.273079	0.294776	0.0422704	0.626043	6.27254	0.343954	0.908337	2.52542	0.452731	2.65939	1	0.338999	Azospirillum sp. 51_20_msp_0220	Azospirillum	Rhodospirillaceae	Rhodospirillales	Alphaproteobacteria	Proteobacteria	Bacteria
msp_0221	0.000440965	0.000606371	0.467091	22	7.33235e-07	1.40796e-06	0.104438	11.4896	1.12981	2.12669	0.410006	0.260962	0.241804	1.44624	38.0756	22.9246	NA	3.15074	15.0479	4.02752	0.116158	NA	0.366235	0.478083	0.659683	0.0922097	0.508319	2.67822	0.504045	1.77512	4.57662	0.270181	0.263105	1	0.852379	Acidaminococcus intestini_msp_0221	Acidaminococcus	Acidaminococcaceae	Acidaminococcales	Negativicutes	Firmicutes	Bacteria
msp_0222	0.00148537	0.00242995	0.541017	15	4.00771e-05	2.9571e-05	0.0366572	88.0881	8.39495	8.64045	14.6276	NA	NA	NA	NA	NA	NA	NA	NA	8.86309	1.56379	NA	10.8367	5.53016	2.94312	3.34907	5.73266	14.5071	2.64705	7.67266	1.61386	5.72421	5.74848	1	0.891291	Clostridium sp. CAG:354_28_25_msp_0222	unclassified Clostridiales	unclassified Clostridiales	Clostridiales	Clostridia	Firmicutes	Bacteria
msp_0223	-0.000917198	0.000482736	0.057433	21	0	9.38193e-07	0.315291	0	1	1.63862	1.4227	0.70161	0.725589	5.73416	3.78028	1.12015	NA	5.10762	6.48773	1.34622	0.103874	NA	0.75723	1.44959	0.478599	0.820562	0.805632	44.1901	NA	1.18732	0.248513	0.992457	20.9014	1	0.410117	Clostridium sp. L2-50_msp_0223	unclassified Clostridiales	unclassified Clostridiales	Clostridiales	Clostridia	Firmicutes	Bacteria
msp_0224	-0.000540714	0.0019198	0.778211	21	8.44002e-06	1.75411e-05	0.253473	11.9829	1.13614	5.78449	4.09512	0.316537	0.277883	1.83525	0.776763	4.92393	NA	5.88352	0.198145	12.8988	19.7876	NA	5.42639	0.593418	1.82854	0.343386	6.05078	15.5646	2.63102	9.17503	0.501404	NA	1.10732	1	0.960102	Prevotella copri 2_msp_0224	Prevotella	Prevotellaceae	Bacteroidales	Bacteroidia	Bacteroidetes	Bacteria
msp_0225	-0.00163423	0.00173778	0.347008	23	3.38941e-05	1.93585e-05	0.000156446	58.1352	2.38864	6.10541	5.45762	4.79718	2.95413	5.8314	7.25916	5.68301	NA	6.92983	3.49498	6.41176	1.21843	1.45624	5.42274	3.51833	3.008	0.96402	4.07589	7.4604	2.04934	4.56564	2.16641	4.12213	5.04794	1	0.780144	Alistipes obesi_msp_0225	Alistipes	Rikenellaceae	Bacteroidales	Bacteroidia	Bacteroidetes	Bacteria
msp_0226	-0.000114812	0.000233525	0.622969	21	1.57236e-07	2.75725e-07	0.0429312	15.3203	1.18092	11.5899	6.25759	NA	7.35871	18.5301	10.1726	5.38435	NA	10.5211	5.15348	2.42876	0.840031	NA	1.71388	0.988828	0.854055	0.395734	1.59666	6.08028	4.77232	1.60082	0.144621	0.730819	2.88538	1	0.921641	unclassified Desulfovibrionales_msp_0226	unclassified Desulfovibrionales	unclassified Desulfovibrionales	Desulfovibrionales	Deltaproteobacteria	Proteobacteria	Bacteria
msp_0227	-0.00908402	0.00279367	0.00114737	22	0.000108205	5.0789e-05	3.97308e-06	73.8004	3.81685	5.85485	5.26717	4.60366	2.4459	5.31323	6.1202	5.40545	NA	6.2138	4.10953	5.86219	2.33273	NA	5.63608	4.54638	3.58292	1.49161	5.01558	6.81499	2.57005	4.84999	2.46654	4.27397	5.22317	1	0.0420279	Eubacterium sp. 36_13 _msp_0227	Eubacterium	Eubacteriaceae	Clostridiales	Clostridia	Firmicutes	Bacteria
msp_0228	0.000356012	0.000143856	0.0133317	14	3.46054e-08	9.23184e-08	0.293411	12.3969	1.14151	NA	3.63649	0.176838	NA	12.2346	8.97288	8.1459	NA	4.71102	NA	NA	1.42585	NA	8.7439	NA	NA	NA	0.677107	22.3748	6.11328	3.65925	NA	2.238	16.89	1	0.200733	Proteus mirabilis_msp_0228	Proteus	Morganellaceae	Enterobacterales	Gammaproteobacteria	Proteobacteria	Bacteria
msp_0229	0.000302488	0.000436946	0.488763	19	0	8.32307e-07	0.77572	0	1	2.29949	6.55295	4.1158	NA	0.538341	NA	9.72834	NA	21.9382	1.67476	4.8702	0.492762	NA	3.90104	1.74533	0.275899	0.0242069	2.40458	12.347	NA	23.0405	2.70994	0.189101	1.15151	1	0.866484	Prevotella sp. 885_msp_0229	Prevotella	Prevotellaceae	Bacteroidales	Bacteroidia	Bacteroidetes	Bacteria
msp_0230	-0.000650096	0.000898357	0.469281	23	1.37794e-06	4.08973e-06	0.168522	7.69927	1.08342	3.05157	7.70646	2.85744	2.31506	3.35069	12.7903	5.56907	NA	16.965	12.7514	4.79696	0.223689	0.393073	3.24835	1.48703	1.01239	0.260039	2.04341	11.1645	0.748083	1.86832	0.3395	2.51157	2.54603	1	0.852413	Alistipes inops == Tidjanibacter massiliensis_msp_0230	Alistipes	Rikenellaceae	Bacteroidales	Bacteroidia	Bacteroidetes	Bacteria
msp_0231	-9.23311e-05	0.000904598	0.918702	12	7.53795e-06	4.10438e-06	0.000342935	92.3251	13.0295	NA	6.0381	6.4635	4.92717	5.93346	9.12985	8.11414	NA	8.47898	10.5065	NA	NA	NA	10.6176	NA	NA	NA	NA	9.66139	NA	NA	NA	10.7103	9.41897	1	0.977649	unclassified Firmicutes_msp_0231	unclassified Firmicutes	unclassified Firmicutes	unclassified Firmicutes	unclassified Firmicutes	Firmicutes	Bacteria
msp_0232	0.000259911	0.00068369	0.703828	22	2.91656e-06	2.59218e-06	0.00459677	37.4965	1.59991	2.1851	4.56104	3.15555	4.0926	5.02414	12.7115	11.6217	NA	9.40729	NA	9.24584	4.21394	0.0479236	3.64077	3.38128	4.62324	0.468009	3.82453	9.54989	1.40585	1.47629	1.27668	1.60346	2.48337	1	0.936228	Dorea sp. CAG:317_msp_0232	Dorea	Lachnospiraceae	Clostridiales	Clostridia	Firmicutes	Bacteria
msp_0233	0.0001397	0.000170278	0.411977	21	0	1.13755e-07	0.308792	0	1	0.83434	0.293839	0.0826923	0.469703	0.569138	1.52334	43.5517	NA	0.784768	1.30203	5.56862	0.221144	NA	0.829075	13.5486	17.6888	0.0273648	7.64652	3.07393	NA	0.60517	0.585375	0.0915366	0.702297	1	0.814077	unclassified Lachnospiraceae_msp_0233	unclassified Lachnospiraceae	Lachnospiraceae	Clostridiales	Clostridia	Firmicutes	Bacteria
msp_0234	-3.42896e-05	0.000280756	0.902793	22	1.98302e-07	3.26003e-07	0.647042	14.7586	1.17314	1.08115	1.92753	23.4215	2.34343	3.70048	14.0022	2.34383	NA	7.10652	24.6251	1.31468	1.75043	NA	0.465889	0.164931	0.387433	0.0371238	0.256555	11.2476	2.76527	0.21865	0.0164891	0.489105	0.334099	1	0.977649	unclassified_msp_0234	unclassified	unclassified	unclassified	unclassified	unclassified	unclassified
msp_0235	-0.00026869	0.00014963	0.072542	13	0	8.93774e-08	0.802305	0	1	NA	1.76279	0.251834	0.460759	3.25807	2.73849	0.745306	NA	1.68256	0.807041	54.0136	NA	NA	NA	NA	17.7554	NA	2.81072	NA	NA	NA	NA	2.68443	11.0291	1	0.449806	unclassified Bacteroides_msp_0235	Bacteroides	Bacteroidaceae	Bacteroidales	Bacteroidia	Bacteroidetes	Bacteria
msp_0236	-0.00622116	0.00221257	0.00492752	23	5.28314e-05	3.16786e-05	0.00157883	54.5073	2.19815	5.17379	5.02424	3.17782	2.35929	5.18913	5.85761	5.83636	NA	6.74833	3.27966	7.10016	2.52531	1.56863	6.02095	3.42383	3.56336	1.36235	4.58646	7.73699	2.92248	5.38523	1.48494	4.45894	5.21415	1	0.103688	Eubacterium ventriosum_msp_0236	Eubacterium	Eubacteriaceae	Clostridiales	Clostridia	Firmicutes	Bacteria
msp_0237	-0.00094849	0.000672202	0.158239	22	4.88568e-06	2.75789e-06	0.00229648	81.8927	5.52265	3.16692	6.89208	7.19432	4.857	7.81029	8.96293	5.42124	NA	7.14647	3.6444	4.65791	3.05521	NA	5.73693	1.71217	2.43299	1.26061	4.12735	9.1938	1.35766	2.8011	1.3373	3.70141	3.52992	1	0.61749	Roseburia sp. CAG:182_msp_0237	Roseburia	Lachnospiraceae	Clostridiales	Clostridia	Firmicutes	Bacteria
msp_0238	-0.000810858	0.000976113	0.406143	22	9.55617e-06	5.33374e-06	0.00448014	89.4537	9.48197	4.539	6.96658	NA	5.37197	9.92338	9.38892	8.1554	NA	9.54904	9.4221	4.9781	0.512118	0.18548	3.83257	2.4543	1.68944	0.643682	2.23554	9.75423	2.0726	2.31356	0.524126	2.57166	2.91619	1	0.808534	unclassified Roseburia_msp_0238	Roseburia	Lachnospiraceae	Clostridiales	Clostridia	Firmicutes	Bacteria
msp_0239	-0.000880811	0.00137882	0.522943	22	2.5646e-05	1.21354e-05	3.02185e-05	86.1108	7.19985	7.23431	3.75367	2.3129	1.27097	3.45495	5.20589	4.23093	NA	4.17621	2.50642	6.73217	3.70362	NA	6.48844	5.68444	4.11842	6.8356	3.90357	6.64526	2.19935	7.32048	2.53923	5.66316	4.02	1	0.889367	unclassified Dakarella_msp_0239	Dakarella	Sutterellaceae	Burkholderiales	Betaproteobacteria	Proteobacteria	Bacteria
msp_0240	-9.99397e-06	0.000101386	0.921477	16	0	3.53956e-08	0.32933	0	1	0.408544	NA	NA	0.230182	29.5087	NA	61.3289	NA	2.67814	0.585414	0.15519	NA	NA	0.144359	0.0510426	0.104681	0.0343698	0.425616	NA	NA	0.107025	0.0725955	0.888151	3.27717	1	0.977649	unclassified Clostridiales_msp_0240	unclassified Clostridiales	unclassified Clostridiales	Clostridiales	Clostridia	Firmicutes	Bacteria
msp_0241	0.000359225	0.000564039	0.524203	17	1.24944e-06	1.53255e-06	0.191269	29.2964	1.41435	5.13034	1.0097	1.91578	2.35156	3.31649	4.44834	2.95741	NA	2.83995	4.56842	18.5671	NA	NA	NA	11.2999	NA	4.1136	16.6849	6.01037	NA	NA	2.45878	11.4405	0.886849	1	0.889367	Klebsiella variicola_msp_0241	Klebsiella	Enterobacteriaceae	Enterobacterales	Gammaproteobacteria	Proteobacteria	Bacteria
msp_0242	0.000881144	0.000460598	0.0557424	20	6.13831e-07	1.12196e-06	0.227174	15.6812	1.18598	4.51199	3.03461	0.963599	2.48116	4.41533	12.1597	11.4074	NA	8.5674	2.86525	16.2926	2.42113	NA	1.6029	3.25135	7.70361	0.26803	4.13281	3.80682	NA	5.41646	NA	2.8084	1.88954	1	0.408365	Anaerotignum lactatifermentans_msp_0242	Anaerotignum	Lachnospiraceae	Clostridiales	Clostridia	Firmicutes	Bacteria
msp_0243	-0.0014681	0.000496394	0.00310107	22	5.25931e-07	1.19136e-06	0.771881	10.6504	1.1192	3.15024	9.38934	2.04116	0.957139	4.82152	7.02893	3.41581	NA	9.92507	3.96716	3.63227	1.06414	NA	2.40551	2.42575	1.28924	0.402537	2.8423	30.3416	0.889034	2.04812	0.216055	2.10958	5.6375	1	0.0817855	Clostridium sp. CAG:253_msp_0243	unclassified Clostridiales	unclassified Clostridiales	Clostridiales	Clostridia	Firmicutes	Bacteria
msp_0244	-0.00105634	0.00100784	0.294584	23	1.16306e-05	6.51698e-06	0.000115882	58.9103	2.4337	4.42273	4.26461	5.40927	2.42719	5.53754	6.8179	5.25163	NA	6.11553	4.79113	6.74437	1.15433	2.20008	5.4074	3.79956	3.79806	0.613799	4.55649	7.58977	2.04286	4.78663	1.12746	5.4074	5.73426	1	0.730433	Ruminococcus sp. CAG:60 _msp_0244	Blautia	Lachnospiraceae	Clostridiales	Clostridia	Firmicutes	Bacteria
msp_0245	0.000155541	0.000307112	0.612531	13	1.93051e-07	3.43268e-07	0.452016	19.5243	1.24261	2.37711	2.98062	NA	NA	NA	NA	NA	NA	21.444	NA	30.2762	0.455168	NA	2.01811	1.03298	9.72989	NA	1.08906	2.2839	0.356453	NA	NA	0.3335	25.623	1	0.919242	Megasphaera massiliensis_msp_0245	Megasphaera	Veillonellaceae	Veillonellales	Negativicutes	Firmicutes	Bacteria
msp_0246	0.00374455	0.000950987	8.23225e-05	22	0	4.25241e-06	0.0811047	0	1	1.53143	2.71605	0.653188	0.944793	1.11715	2.5545	4.41057	NA	3.81232	3.9411	18.5538	1.26793	0.030664	2.3493	1.27695	1.47298	3.83688	12.4986	5.87176	1.92791	4.18354	NA	1.87145	23.1771	0.162834	0.00853073	Tyzzerella nexilis_msp_0246	Tyzzerella	Lachnospiraceae	Clostridiales	Clostridia	Firmicutes	Bacteria
msp_0247	-0.00103721	0.000715127	0.14695	21	4.67786e-06	3.01517e-06	0.0237075	56.3724	2.29213	6.75242	4.91102	8.82633	2.27362	6.93189	7.78394	4.22551	NA	6.6269	1.78011	4.33194	0.593102	NA	5.09876	3.06272	1.05272	1.76334	4.27367	9.5282	NA	3.31793	1.72787	6.3611	8.77692	1	0.598079	Clostridium sp. 44_14 _msp_0247	unclassified Clostridiales	unclassified Clostridiales	Clostridiales	Clostridia	Firmicutes	Bacteria
msp_0248	-3.36951e-05	0.000138183	0.807352	7	6.99236e-08	6.89595e-08	0.0599767	76.1576	4.19421	22.8978	NA	NA	NA	NA	NA	NA	NA	18.7153	NA	4.91703	NA	NA	5.03618	1.94837	NA	NA	NA	26.9674	NA	19.5179	NA	NA	NA	1	0.963879	unclassified_msp_0248	unclassified	unclassified	unclassified	unclassified	unclassified	unclassified
msp_0249	-4.0394e-05	0.000647601	0.950264	23	4.64071e-06	2.65061e-06	9.75726e-05	58.4745	2.40816	6.39154	4.90444	6.33031	3.4447	5.62199	7.34272	5.71083	NA	7.00386	5.59839	6.44628	1.90256	0.756119	5.4205	2.24888	3.20017	0.880692	4.211	7.61716	1.68355	3.78338	1.45614	3.25088	4.79392	1	0.985644	unclassified Firmicutes_msp_0249	unclassified Firmicutes	unclassified Firmicutes	unclassified Firmicutes	unclassified Firmicutes	Firmicutes	Bacteria
msp_0250	-0.00257224	0.00152646	0.0919703	23	6.71741e-06	1.29257e-05	0.109533	13.5038	1.15612	4.57876	4.73558	2.33911	1.49149	5.18852	8.76872	6.19916	NA	9.96527	3.70566	8.8448	0.800175	0.0945266	4.97508	2.47984	2.06359	0.483726	3.06458	16.5445	1.53973	3.37987	0.68563	3.44255	4.62916	1	0.499773	Ruminococcus lactaris_msp_0250	Ruminococcus	Ruminococcaceae	Clostridiales	Clostridia	Firmicutes	Bacteria
msp_0251	-9.06199e-06	0.00173866	0.995841	18	2.07828e-05	1.71663e-05	0.513638	43.6819	1.77563	7.60517	NA	7.50755	2.08798	6.06626	4.22874	5.87966	NA	6.53156	3.26862	7.18302	4.07931	NA	3.63539	2.81836	5.16597	0.318407	6.20432	11.4419	NA	6.71089	NA	NA	9.2669	1	0.998265	unclassified Prevotella_msp_0251	Prevotella	Prevotellaceae	Bacteroidales	Bacteroidia	Bacteroidetes	Bacteria
msp_0252	9.35748e-05	0.000215525	0.664164	18	0	1.77567e-07	0.673602	0	1	0.412591	NA	NA	NA	50.1906	11.4391	5.80066	NA	19.6283	5.76386	0.805505	1.63923	NA	0.229018	0.037911	0.0778349	0.00757037	0.145168	3.20076	0.294753	0.171238	0.0843988	0.0714759	NA	1	0.930503	unclassified Ruminiclostridium_msp_0252	Ruminiclostridium	Ruminococcaceae	Clostridiales	Clostridia	Firmicutes	Bacteria
msp_0253	0.000171773	0.000181926	0.345074	9	5.71575e-08	1.34396e-07	0.280207	19.1921	1.2375	6.40992	NA	NA	NA	NA	NA	NA	NA	NA	NA	12.44	NA	NA	10.456	6.73043	0.334148	NA	NA	47.5839	4.98646	8.36483	NA	2.6943	NA	1	0.779174	unclassified Bilophila_msp_0253	Bilophila	Desulfovibrionaceae	Desulfovibrionales	Deltaproteobacteria	Proteobacteria	Bacteria
msp_0254	0.000902319	0.000594932	0.129349	23	2.35143e-06	2.01614e-06	0.0434573	37.3057	1.59504	2.14456	3.30554	10.4506	4.03041	2.22166	8.78316	4.98862	NA	7.32756	10.4209	5.96196	0.480906	0.265316	2.94836	3.17676	3.27904	0.289616	3.61947	7.04618	11.3605	3.27556	1.23048	1.66619	1.7266	1	0.568938	unclassified Lachnospiraceae_msp_0254	unclassified Lachnospiraceae	Lachnospiraceae	Clostridiales	Clostridia	Firmicutes	Bacteria
msp_0255	-3.17304e-05	7.79501e-05	0.683963	15	0	2.20962e-08	0.470847	0	1	6.39135	NA	NA	NA	27.7386	10.709	NA	NA	12.2936	NA	0.99036	NA	NA	0.472735	0.119831	0.284847	0.0687678	0.0745008	35.3034	0.477532	3.79761	0.0701012	1.20783	NA	1	0.930503	unclassified_msp_0255	unclassified	unclassified	unclassified	unclassified	unclassified	unclassified
msp_0256	-0.000200262	0.000406742	0.622468	15	3.74535e-07	7.02847e-07	0.412906	17.1578	1.20711	6.7283	13.3831	NA	NA	4.03686	NA	12.8169	NA	26.4248	NA	3.68114	0.754678	NA	6.0875	2.23813	0.925209	NA	0.709309	16.6332	0.269927	4.84345	0.467524	NA	NA	1	0.921641	Bacteroides sp. CAG:462_msp_0256	Bacteroides	Bacteroidaceae	Bacteroidales	Bacteroidia	Bacteroidetes	Bacteria
msp_0257	0.000335529	0.000278608	0.228471	18	0	3.19271e-07	0.433516	0	1	18.5611	1.31105	0.950021	NA	5.34007	43.7368	4.99078	NA	2.02727	1.07163	1.7617	NA	NA	3.83753	0.0656177	0.423473	1.90987	0.798429	1.41552	0.0122072	4.5188	NA	NA	7.26808	1	0.696961	unclassified Prevotella_msp_0257	Prevotella	Prevotellaceae	Bacteroidales	Bacteroidia	Bacteroidetes	Bacteria
msp_0258	0.00340173	0.00198039	0.0858492	23	4.51161e-05	2.5093e-05	0.000253392	58.7602	2.42484	5.88454	4.67242	3.34706	3.88138	5.75623	6.6474	5.35021	NA	6.52773	4.6805	6.801	1.75741	0.398266	5.44514	4.05654	3.2265	0.866946	4.58238	7.17623	1.74086	4.95321	1.63506	4.6959	5.9171	1	0.483797	Firmicutes bacterium CAG:102_msp_0258	unclassified Firmicutes	unclassified Firmicutes	unclassified Firmicutes	unclassified Firmicutes	Firmicutes	Bacteria
msp_0259	-0.00260074	0.00233184	0.264716	23	6.83556e-05	3.58616e-05	6.01651e-05	61.9014	2.62477	4.64716	4.56204	4.05125	3.25206	5.2972	6.17536	5.38457	NA	6.16246	4.02204	6.38326	1.7087	1.09348	5.39102	3.73884	4.31918	1.54205	4.99557	6.70008	3.07944	4.82824	2.86919	4.97109	4.82571	1	0.719022	Coprococcus comes_msp_0259	Coprococcus	Lachnospiraceae	Clostridiales	Clostridia	Firmicutes	Bacteria
msp_0260	-0.000805725	0.000401228	0.0446275	21	0	7.27761e-07	0.689565	0	1	1.2519	1.35658	10.9376	2.17582	0.934271	4.01415	2.97965	NA	3.49695	2.22671	3.91597	0.394856	NA	0.920378	1.92632	0.228955	0.290233	0.416221	6.98751	NA	3.96149	0.280917	1.82501	49.4785	1	0.371244	Prevotella sp. KHD1 _msp_0260	Prevotella	Prevotellaceae	Bacteroidales	Bacteroidia	Bacteroidetes	Bacteria
msp_0261	7.93354e-05	0.000261952	0.761995	17	2.26554e-07	3.05487e-07	0.264787	24.326	1.32146	6.71723	4.53918	1.9584	NA	17.733	9.58374	NA	NA	15.9068	0.28529	6.66563	NA	NA	2.68209	0.952978	0.495028	NA	2.27375	18.9738	NA	9.23128	0.598193	0.502904	0.900683	1	0.958795	Bacteroides sp. CAG:770_msp_0261	Bacteroides	Bacteroidaceae	Bacteroidales	Bacteroidia	Bacteroidetes	Bacteria
msp_0262	-0.000837061	0.00131477	0.524347	23	1.20346e-05	1.04629e-05	0.0520102	36.184	1.56701	5.72016	4.66748	4.62233	1.5505	5.40115	8.61885	4.45527	NA	7.86139	3.5801	7.24328	1.35528	0.317453	5.28509	3.29798	2.61235	0.505241	4.27241	11.3755	2.08642	4.01831	1.18434	4.90073	5.06839	1	0.889367	Ruminococcus callidus_msp_0262	Ruminococcus	Ruminococcaceae	Clostridiales	Clostridia	Firmicutes	Bacteria
msp_0263	-0.00622677	0.00274482	0.0232953	23	3.24733e-05	4.21184e-05	0.134689	21.6095	1.27567	3.10724	3.7694	4.5846	1.58428	6.7356	14.5179	6.46054	NA	9.81109	1.77003	8.46049	1.36037	0.682867	4.2419	2.34213	2.16019	0.604954	3.36861	10.3914	0.568485	3.76217	0.450287	3.76196	5.50353	1	0.275916	Bifidobacterium adolescentis_msp_0263	Bifidobacterium	Bifidobacteriaceae	Bifidobacteriales	Actinobacteria	Actinobacteria	Bacteria
msp_0264	-0.000280934	0.00014651	0.0551733	18	1.01172e-08	8.34349e-08	0.402434	2.27744	1.02331	3.20521	NA	2.31755	NA	5.14643	NA	1.69349	NA	25.4122	1.63003	1.76359	0.268922	NA	1.38261	0.525895	0.67103	0.344734	1.94116	38.8486	NA	0.909669	0.2628	5.72117	7.9549	1	0.405698	Parabacteroides sp. SN4_msp_0264	Parabacteroides	Tannerellaceae	Bacteroidales	Bacteroidia	Bacteroidetes	Bacteria
msp_0265	-0.00228253	0.000942175	0.015409	22	6.09468e-06	4.82293e-06	0.0399506	51.3959	2.05744	2.64655	6.33018	5.39961	5.90815	8.42204	7.70736	2.27835	NA	9.20829	1.35491	3.9492	1.35065	NA	2.37249	2.0463	0.65789	0.284409	1.39875	11.9094	0.747436	2.03569	2.58446	7.34541	14.0625	1	0.208924	unclassified Faecalibacterium_msp_0265	Faecalibacterium	Ruminococcaceae	Clostridiales	Clostridia	Firmicutes	Bacteria
msp_0266	0.000866237	0.00064563	0.179696	16	3.63066e-06	2.19774e-06	0.0459555	79.3597	4.84488	8.80333	2.4722	0.741835	3.48516	3.14641	2.77557	9.31784	NA	3.20999	9.41627	NA	NA	NA	9.31206	NA	NA	7.21809	10.9756	5.244	4.50348	11.1376	NA	8.2406	NA	1	0.64642	Fusobacterium ulcerans_msp_0266	Fusobacterium	Fusobacteriaceae	Fusobacteriales	Fusobacteriia	Fusobacteria	Bacteria
msp_0267	0.000322401	0.0003026	0.286679	15	4.30251e-07	4.42857e-07	0.2591	37.0544	1.58867	3.44199	13.4459	NA	NA	11.1258	9.74527	NA	NA	10.7276	1.3876	7.56995	NA	NA	4.46189	1.51519	NA	1.44928	12.8778	7.49739	NA	1.58914	NA	11.745	1.42018	1	0.727594	unclassified Bacteroides_msp_0267	Bacteroides	Bacteroidaceae	Bacteroidales	Bacteroidia	Bacteroidetes	Bacteria
msp_0268	0.000105083	0.00017645	0.551483	9	0	1.01667e-07	0.607529	0	1	1.69983	NA	NA	NA	NA	NA	NA	NA	NA	NA	29.4045	0.251042	NA	NA	NA	5.47073	0.311217	NA	30.4192	NA	30.5822	NA	0.381731	1.47961	1	0.891291	unclassified Blautia_msp_0268	Blautia	Lachnospiraceae	Clostridiales	Clostridia	Firmicutes	Bacteria
msp_0269	-0.00106552	0.000667806	0.110589	21	3.25821e-06	2.56746e-06	0.004752	44.1603	1.79084	6.7933	3.92051	7.45085	0.623012	5.73456	7.10903	2.70878	NA	6.36317	2.21007	5.17969	NA	NA	4.62405	1.10997	3.4287	0.315657	11.4593	10.1571	1.77467	3.78847	8.69024	2.85429	3.70453	1	0.533331	unclassified Clostridiales_msp_0269	unclassified Clostridiales	unclassified Clostridiales	Clostridiales	Clostridia	Firmicutes	Bacteria
msp_0270	0.00125716	0.00127531	0.324244	22	2.44676e-05	1.06036e-05	1.70717e-06	86.2532	7.27443	5.22313	4.86206	6.51132	3.386	5.95067	6.35198	5.1031	NA	6.15416	5.39627	5.71291	2.72184	NA	4.69068	3.57405	3.50534	1.04333	4.20444	6.43536	2.89152	4.0088	2.7331	4.82477	4.71516	1	0.761115	unclassified Firmicutes_msp_0270	unclassified Firmicutes	unclassified Firmicutes	unclassified Firmicutes	unclassified Firmicutes	Firmicutes	Bacteria
msp_0271	0.00263274	0.00407078	0.517801	23	0.000125721	9.9474e-05	0.00874812	40.7625	1.68812	6.86076	2.6148	3.12255	2.10152	3.5247	7.34816	4.44967	NA	7.47067	2.92142	9.59286	1.2131	0.895939	5.43452	3.58407	3.36845	0.65167	4.7316	10.5144	1.43988	6.33501	0.600701	5.61815	5.60539	1	0.889367	Eubacterium sp. CAG:180_msp_0271	Eubacterium	Eubacteriaceae	Clostridiales	Clostridia	Firmicutes	Bacteria
msp_0272	-0.00178919	0.00130468	0.170262	13	9.28523e-06	7.78641e-06	0.00659841	82.5692	5.73696	8.64282	NA	NA	NA	NA	NA	NA	NA	NA	NA	10.37	NA	NA	8.62373	4.92635	3.46046	2.66185	5.36475	18.2449	1.05752	6.76396	1.12322	11.1234	17.6371	1	0.635566	unclassified Blautia_msp_0272	Blautia	Lachnospiraceae	Clostridiales	Clostridia	Firmicutes	Bacteria
msp_0273	-4.70111e-05	0.000412979	0.909369	15	2.61639e-07	7.0919e-07	0.375097	10.7457	1.12039	29.0365	5.02299	NA	6.14147	3.95296	8.08849	2.30958	NA	8.59219	0.21399	3.26395	0.332104	NA	1.90026	3.6476	NA	NA	NA	23.8007	NA	3.22607	NA	0.47112	NA	1	0.977649	Clostridium sp. CAG:510_msp_0273	unclassified Clostridiales	unclassified Clostridiales	Clostridiales	Clostridia	Firmicutes	Bacteria
msp_0274	0.00114502	0.000473178	0.0155267	23	2.31356e-07	1.06254e-06	0.248322	4.46018	1.04668	1.43942	1.88941	1.13135	1.43213	2.23214	21.5835	7.78997	NA	6.68232	8.72188	20.3303	0.668635	0.0554822	2.20525	3.17932	2.96547	0.340569	2.39823	5.90972	0.496292	2.05815	1.68367	1.96897	2.8378	1	0.208924	Sellimonas intestinalis == Drancourtella massiliensis_msp_0274	Sellimonas	Lachnospiraceae	Clostridiales	Clostridia	Firmicutes	Bacteria
msp_0275	0.000149697	0.000746225	0.841007	20	1.08333e-06	2.51283e-06	0.133214	10.543	1.11786	19.3518	0.987392	0.258742	0.0607692	1.73162	0.124993	2.52504	NA	0.859728	0.0310568	8.06391	1.03052	NA	4.4518	10.8043	5.38481	NA	1.26075	8.32827	0.0839176	21.1744	NA	5.26537	8.22077	1	0.969276	Prevotella stercorea_msp_0275	Prevotella	Prevotellaceae	Bacteroidales	Bacteroidia	Bacteroidetes	Bacteria
msp_0276	0.000143591	6.85786e-05	0.0362759	21	0	1.68718e-08	0.669952	0	1	0.408339	0.287156	2.42198	2.66475	18.7508	35.6903	17.3565	NA	19.1405	NA	0.356009	0.320957	0.015129	0.356584	0.0477361	0.0650829	0.00604462	0.0786655	1.04244	0.170902	0.0975859	NA	0.404469	0.318021	1	0.34497	Flavonifractor sp. An10_msp_0276	Flavonifractor	unclassified Clostridiales	Clostridiales	Clostridia	Firmicutes	Bacteria
msp_0277	-0.00328185	0.00295716	0.267086	22	9.81987e-05	5.5443e-05	0.00104578	63.3872	2.73128	4.83138	4.69003	3.00414	3.00071	5.06116	7.25717	5.26989	NA	6.70988	4.68153	7.08075	1.24836	NA	4.50073	3.82456	2.94594	1.6071	4.78753	8.33916	2.9405	5.89132	1.4425	5.08118	5.80447	1	0.719022	Eubacterium sp. CAG:251 _msp_0277	unclassified Clostridiales	unclassified Clostridiales	Clostridiales	Clostridia	Firmicutes	Bacteria
msp_0278	0.000374839	0.00020698	0.0701421	23	2.8449e-07	2.49627e-07	0.146883	36.3723	1.57164	2.41055	2.17696	1.47316	3.12341	1.20375	6.03541	7.32705	NA	4.41965	10.4555	12.1067	0.533014	0.073826	4.61364	5.17553	6.93777	1.18309	6.57568	7.43429	5.75404	1.99906	2.02283	3.63052	3.33459	1	0.449806	Erysipelotrichaceae bacterium 3_1_53_msp_0278	unclassified Erysipelotrichaceae	Erysipelotrichaceae	Erysipelotrichales	Erysipelotrichia	Firmicutes	Bacteria
msp_0279	0.000481899	0.000422514	0.254056	21	1.89053e-06	1.07888e-06	0.00010795	66.6774	3.00097	7.62518	2.31062	1.16959	2.432	3.94088	6.4571	6.81888	NA	5.33497	7.42033	8.99601	5.57107	NA	3.75257	2.43799	3.2775	0.761237	6.57904	7.72565	NA	5.44585	3.12545	2.39768	6.42038	1	0.707423	Cloacibacillus porcorum_msp_0279	Cloacibacillus	Synergistaceae	Synergistales	Synergistia	Synergistetes	Bacteria
msp_0280	0.000589719	0.00140479	0.674637	23	9.42236e-06	1.14379e-05	0.661322	23.1253	1.30082	8.02155	2.72376	1.05929	2.48306	7.18641	8.9165	7.94866	NA	9.06106	1.02911	5.44559	1.36834	0.133699	5.4879	2.75493	3.54311	0.745309	6.94535	10.3371	1.11492	4.76491	0.798477	3.56727	4.56368	1	0.930503	Sutterella wadsworthensis 2_msp_0280	Sutterella	Sutterellaceae	Burkholderiales	Betaproteobacteria	Proteobacteria	Bacteria
msp_0281	-0.00150418	0.0010292	0.143877	22	2.02335e-06	5.04458e-06	0.233514	9.27814	1.10227	1.35461	2.5926	4.30157	1.7271	4.5505	19.6025	3.46312	NA	14.2392	17.0627	5.43474	0.556016	NA	2.06343	0.726744	0.520684	0.260582	2.16861	9.22723	0.544323	3.23194	0.833561	1.50061	4.03769	1	0.59662	Catenibacterium sp. CAG:290_msp_0281	Catenibacterium	Erysipelotrichaceae	Erysipelotrichales	Erysipelotrichia	Firmicutes	Bacteria
msp_0282	0.000109384	0.000403772	0.786463	23	1.01638e-06	8.48895e-07	0.0440224	46.4526	1.86751	2.99402	6.77457	2.77816	5.58188	6.52229	14.8551	7.45412	NA	9.37398	1.99536	3.17639	0.553874	0.0809245	3.55795	0.986178	1.29164	0.486619	2.91698	10.8963	0.605094	1.80769	0.113492	1.47438	13.723	1	0.960102	Ruminococcus sp. CAG:330_msp_0282	Ruminococcus	Ruminococcaceae	Clostridiales	Clostridia	Firmicutes	Bacteria
msp_0285	-0.0053949	0.00247392	0.0292053	22	5.00223e-05	3.76977e-05	0.0201597	44.5876	1.80465	5.05228	5.73672	3.98595	2.83467	4.98028	7.39917	5.98716	NA	7.91061	4.23328	7.65603	1.34912	NA	4.37363	2.98043	3.11777	0.910655	3.94109	10.3856	1.65797	4.85333	1.8679	5.32682	3.45949	1	0.309899	Clostridium sp. CAG:217_msp_0285	unclassified Clostridiales	unclassified Clostridiales	Clostridiales	Clostridia	Firmicutes	Bacteria
msp_0286	-0.000260818	0.000369282	0.480011	21	8.68136e-08	5.77635e-07	0.247965	2.89842	1.02985	0.862907	5.86419	9.66472	0.693281	11.886	13.8542	18.5375	NA	7.01695	NA	2.34354	0.125456	NA	1.45654	0.230136	0.277314	0.0429494	1.34926	23.4311	0.270968	0.568679	0.0372951	0.598868	0.888148	1	0.857689	Ruminococcus sp. 37_24 _msp_0286	Ruminococcus	Ruminococcaceae	Clostridiales	Clostridia	Firmicutes	Bacteria
msp_0287	0.00240578	0.00124293	0.0529193	23	1.78805e-05	9.84655e-06	0.000174634	61.0644	2.56834	5.90228	5.17374	5.46694	3.1767	6.4675	7.33434	5.38457	NA	6.9751	3.81005	6.27915	0.796611	1.26689	5.17984	3.2979	3.38391	0.8736	3.76937	7.32748	2.61638	4.27305	1.33673	4.69855	5.20932	1	0.397574	Alistipes ihumii_msp_0287	Alistipes	Rikenellaceae	Bacteroidales	Bacteroidia	Bacteroidetes	Bacteria
msp_0288	0.000393634	0.000710109	0.579353	21	0	2.38381e-06	0.284684	0	1	18.225	1.71194	0.888428	0.731512	1.74531	3.26556	16.0225	NA	5.21806	0.614176	8.12961	0.863567	NA	4.68965	1.46164	0.922001	0.156413	2.99592	12.6225	NA	12.7113	0.986915	4.84236	1.1956	1	0.901272	unclassified_msp_0288	unclassified	unclassified	unclassified	unclassified	unclassified	unclassified
msp_0289	0.00124812	0.000864106	0.148626	16	7.64502e-06	3.95548e-06	0.0390041	92.8944	14.0735	9.36246	1.8559	1.06723	3.40177	2.16682	2.91246	8.36185	NA	4.28125	8.87595	NA	NA	NA	9.28967	NA	8.23981	3.75567	9.11773	8.00258	NA	NA	NA	9.63513	9.67372	1	0.603659	Fusobacterium varium_msp_0289	Fusobacterium	Fusobacteriaceae	Fusobacteriales	Fusobacteriia	Fusobacteria	Bacteria
msp_0290	0.000736742	0.00125095	0.555897	22	6.11417e-06	8.14888e-06	0.125773	21.5242	1.27428	5.69916	2.3211	15.296	1.27713	4.01658	5.17762	4.77061	NA	9.7483	7.38384	8.12205	2.33953	1.62706	2.29423	1.98243	0.606214	0.113576	2.80155	16.4857	NA	2.72159	0.122648	2.61142	2.48165	1	0.891291	Clostridium sp. CAG:352 _msp_0290	unclassified Clostridiales	unclassified Clostridiales	Clostridiales	Clostridia	Firmicutes	Bacteria
msp_0291	-0.00135833	0.00123184	0.270166	23	1.05175e-05	9.02673e-06	0.0492266	36.1882	1.56711	4.42838	4.42448	5.93905	2.63314	8.38279	10.7529	5.69908	NA	8.25697	5.36201	7.10588	0.679589	0.124438	4.63704	2.21532	3.45454	0.420814	3.31212	8.78812	1.10072	3.17377	1.74534	2.79117	4.57234	1	0.719022	unclassified Clostridiales_msp_0291	unclassified Clostridiales	unclassified Clostridiales	Clostridiales	Clostridia	Firmicutes	Bacteria
msp_0292	0.000606579	0.000238208	0.0108832	16	1.96537e-07	2.17914e-07	0.00681312	39.535	1.65385	1.59437	NA	NA	NA	NA	26.4378	13.9642	NA	21.2064	NA	8.82226	0.559934	NA	0.858661	1.1241	0.864213	0.0593579	0.821596	19.0822	NA	0.764264	2.60488	0.554814	0.680915	1	0.175016	unclassified Lachnospiraceae_msp_0292	unclassified Lachnospiraceae	Lachnospiraceae	Clostridiales	Clostridia	Firmicutes	Bacteria
msp_0293	0.000530825	0.000324003	0.101353	12	0	3.85328e-07	0.415598	0	1	NA	0.520433	1.6689	0.215265	0.31631	0.44961	21.9134	NA	2.6294	8.69435	11.7204	NA	NA	NA	NA	NA	NA	NA	50.6774	0.21256	NA	NA	0.98199	NA	1	0.517683	unclassified Bacteroides_msp_0293	Bacteroides	Bacteroidaceae	Bacteroidales	Bacteroidia	Bacteroidetes	Bacteria
msp_0294	-0.000400237	0.000342877	0.243093	18	0	4.37174e-07	0.987867	0	1	1.41876	NA	NA	NA	NA	2.37414	2.21965	NA	25.211	3.39869	0.992151	0.0270474	NA	0.480353	0.190149	0.389228	0.19942	0.246566	61.8517	0.215969	0.411546	0.0065873	0.276438	0.0906274	1	0.706075	Butyrivibrio sp. CAG:318_msp_0294	Butyrivibrio	Lachnospiraceae	Clostridiales	Clostridia	Firmicutes	Bacteria
msp_0295	6.12755e-05	0.000274658	0.82346	22	4.996e-07	4.17972e-07	0.0724669	40.6467	1.68483	12.0118	0.884324	0.950072	3.79155	2.29205	9.78892	2.73941	NA	3.62647	9.2116	8.54647	1.82124	NA	2.38342	1.1287	5.45444	4.3493	0.622832	11.6454	4.08263	3.07382	7.82404	2.8432	0.928357	1	0.966622	Desulfovibrio fairfieldensis_msp_0295	Desulfovibrio	Desulfovibrionaceae	Desulfovibrionales	Deltaproteobacteria	Proteobacteria	Bacteria
msp_0296	-0.00179732	0.00132238	0.174096	22	2.14079e-05	1.10576e-05	0.000211503	68.844	3.20966	4.61473	5.64042	4.98076	3.5458	6.62249	7.30651	5.28035	NA	6.99871	7.15562	6.24485	1.4284	NA	4.74261	2.98786	3.30728	0.685991	3.92561	7.04084	2.09256	4.76808	1.85658	4.26412	4.50982	1	0.638889	unclassified Lachnospiraceae_msp_0296	unclassified Lachnospiraceae	Lachnospiraceae	Clostridiales	Clostridia	Firmicutes	Bacteria
msp_0297	0.00040811	0.000156514	0.00912053	20	7.84419e-09	9.43026e-08	0.116478	1.36586	1.01385	1.5515	1.61033	28.6411	2.56365	4.81955	36.01	3.56137	NA	3.18051	6.5648	4.67057	NA	NA	0.507186	0.197768	0.462968	0.0457467	0.347671	4.05554	NA	0.222888	0.101652	0.210992	0.674216	1	0.154192	unclassified Ruminococcaceae_msp_0297	unclassified Ruminococcaceae	Ruminococcaceae	Clostridiales	Clostridia	Firmicutes	Bacteria
msp_0298	-0.000141938	0.000197913	0.473265	21	0	1.48606e-07	0.177637	0	1	0.491268	1.73963	NA	1.12474	6.3236	22.475	18.4936	NA	8.20766	4.26857	0.744988	0.954582	NA	0.4955	0.117691	0.139992	0.0454534	0.265841	32.3844	0.304905	0.312759	0.0438543	0.384327	0.681629	1	0.852413	unclassified Firmicutes_msp_0298	unclassified Firmicutes	unclassified Firmicutes	unclassified Firmicutes	unclassified Firmicutes	Firmicutes	Bacteria
msp_0299	-0.000786475	0.00107329	0.463699	23	1.1851e-05	7.20413e-06	0.00416651	53.6842	2.15909	4.02565	5.14408	6.10192	3.05872	5.88061	7.40663	4.83201	NA	7.1849	5.7373	7.05969	1.38183	0.228297	5.37019	3.54148	3.73615	0.866415	4.2181	7.8973	1.00142	4.54009	0.90858	4.28134	5.59732	1	0.852379	Eubacterium ramulus_msp_0299	Eubacterium	Eubacteriaceae	Clostridiales	Clostridia	Firmicutes	Bacteria
msp_0300	0.000625156	0.000773338	0.418868	20	2.88603e-06	2.96026e-06	0.257093	31.5221	1.46033	4.67701	14.4868	3.97754	NA	12.2486	5.28844	6.21833	NA	9.73687	0.366892	6.75644	0.490742	NA	1.91956	0.58967	0.644928	NA	2.05462	11.9356	0.226075	12.946	0.778652	3.87863	0.778599	1	0.819484	unclassified Bacteroidales_msp_0300	unclassified Bacteroidales	unclassified Bacteroidales	Bacteroidales	Bacteroidia	Bacteroidetes	Bacteria
msp_0301	-0.00335156	0.00361184	0.353441	23	0.000134701	8.31674e-05	0.00238144	51.7969	2.07456	5.43938	4.86483	5.24598	3.09024	5.59403	6.74971	5.89901	NA	6.64871	4.1515	6.76724	1.10634	0.400776	5.59446	2.97839	3.58121	1.13856	5.07161	7.69409	2.13788	4.59347	1.66597	4.67292	4.91371	1	0.781434	Faecalibacterium prausnitzii 1 (A2-165)_msp_0301	Faecalibacterium	Ruminococcaceae	Clostridiales	Clostridia	Firmicutes	Bacteria
msp_0302	-0.00158929	0.000805095	0.0483769	21	2.72837e-06	3.27922e-06	0.0292296	25.4982	1.34225	2.2464	2.70437	2.8054	0.434138	2.65941	5.7119	2.78923	NA	3.24857	1.66896	4.24198	0.787952	NA	3.18344	1.6502	0.84238	14.7288	3.12365	13.885	3.92946	2.13964	NA	12.0728	15.1463	1	0.380117	unclassified Clostridiales_msp_0302	unclassified Clostridiales	unclassified Clostridiales	Clostridiales	Clostridia	Firmicutes	Bacteria
msp_0303	1.05285e-05	0.00028958	0.970997	22	2.74092e-07	3.83962e-07	0.111936	18.4751	1.22662	0.842584	3.04732	11.7394	1.69	8.93297	15.4016	12.7926	NA	18.2368	9.23872	2.08256	0.244088	NA	0.882008	0.351788	0.354218	0.128413	0.438864	8.75583	1.11899	0.46333	0.277265	1.26998	1.71079	1	0.990872	unclassified Clostridiales_msp_0303	unclassified Clostridiales	unclassified Clostridiales	Clostridiales	Clostridia	Firmicutes	Bacteria
msp_0304	-0.00116464	0.00074894	0.119933	16	0	2.3438e-06	0.360944	0	1	0.990126	NA	NA	NA	NA	NA	4.67591	NA	NA	1.89241	3.54746	1.07131	NA	5.44965	0.395331	0.315823	0.0262209	3.47244	14.0845	9.46263	13.3105	4.99445	0.771074	35.5401	1	0.555484	Alistipes sp. CAG:514_msp_0304	Alistipes	Rikenellaceae	Bacteroidales	Bacteroidia	Bacteroidetes	Bacteria
msp_0305	-0.00270539	0.000830804	0.00112853	21	6.2222e-06	4.2208e-06	0.0143083	50.3124	2.01257	5.83483	7.17982	2.95199	0.82403	4.35029	5.8642	4.24198	NA	6.227	4.72639	6.36415	0.769561	NA	4.84851	5.24464	3.80577	1.00526	7.80631	9.42639	4.08963	6.05325	NA	3.37277	5.01323	1	0.0420279	Roseburia sp. CAG:303_msp_0305	Roseburia	Lachnospiraceae	Clostridiales	Clostridia	Firmicutes	Bacteria
msp_0306	-0.00218383	0.00173884	0.209147	22	9.82412e-06	1.56299e-05	0.0865028	17.1127	1.20646	3.68048	3.94656	5.56283	2.86006	7.24523	13.9199	5.42567	NA	10.2151	4.03777	5.95198	0.683164	NA	3.29665	1.52565	1.11086	0.524285	2.83474	19.1533	0.978652	2.73984	0.35494	2.16328	1.78909	1	0.680415	Firmicutes bacterium CAG:176_msp_0306	unclassified Firmicutes	unclassified Firmicutes	unclassified Firmicutes	unclassified Firmicutes	Firmicutes	Bacteria
msp_0307	-0.00185472	0.00210388	0.378008	22	4.72408e-05	2.82211e-05	0.000460677	55.8282	2.26389	3.96011	4.78476	5.09452	3.84009	6.44624	7.46512	4.80639	NA	6.91735	5.99524	6.51761	1.83175	NA	5.14424	3.18932	3.43721	0.784443	4.37562	7.55368	2.57428	4.213	1.9301	4.3732	4.76574	1	0.791268	Dorea longicatena 1_msp_0307	Dorea	Lachnospiraceae	Clostridiales	Clostridia	Firmicutes	Bacteria
msp_0308	0.000509289	0.000306111	0.096165	23	0	4.31678e-07	0.324386	0	1	3.04714	1.94738	1.11566	1.01669	2.71674	8.28283	46.1954	NA	7.93633	3.6029	4.58712	0.169456	0.202651	1.64108	0.59587	1.03189	0.0891247	2.36779	5.44664	0.599682	1.62604	2.5233	0.711368	2.54688	1	0.511329	Clostridium saccharolyticum 2_msp_0308	Lachnoclostridium	Lachnospiraceae	Clostridiales	Clostridia	Firmicutes	Bacteria
msp_0309	0.000171451	0.000619795	0.782068	21	4.49532e-06	2.35073e-06	0.00462601	74.26	3.885	2.56038	3.03442	2.19884	1.72238	2.82132	2.3942	5.67584	NA	4.74225	7.32048	7.87089	1.10941	NA	5.28341	6.37685	8.1481	2.83351	7.09846	5.3282	5.28109	6.63905	NA	4.1991	7.3618	1	0.960102	unclassified Blautia_msp_0309	Blautia	Lachnospiraceae	Clostridiales	Clostridia	Firmicutes	Bacteria
msp_0310	-0.000142271	0.000111984	0.203922	11	4.14806e-08	5.26797e-08	0.521714	35.6791	1.5547	NA	6.96645	0.405463	0.44521	20.0636	14.552	NA	NA	19.3565	NA	2.22451	NA	NA	6.28054	NA	NA	NA	NA	12.1801	NA	8.04945	NA	9.47615	NA	1	0.673386	Barnesiella sp. An22_msp_0310	Barnesiella	Barnesiellaceae	Bacteroidales	Bacteroidia	Bacteroidetes	Bacteria
msp_0311	-0.000521536	0.000931357	0.575497	14	6.66332e-06	4.2601e-06	0.0467113	92.7888	13.8673	6.13197	NA	NA	NA	NA	12.9252	NA	NA	NA	12.336	4.83168	9.99137	NA	8.82424	5.68068	2.62954	2.89733	12.1611	NA	NA	3.89588	2.36557	2.45411	12.8753	1	0.900763	unclassified Firmicutes_msp_0311	unclassified Firmicutes	unclassified Firmicutes	unclassified Firmicutes	unclassified Firmicutes	Firmicutes	Bacteria
msp_0312	-0.00217825	0.00171869	0.205018	22	2.71997e-05	1.81351e-05	0.00198369	51.233	2.05057	5.00127	4.85123	6.96967	2.02084	6.59828	8.54249	5.73211	NA	7.49216	5.43855	6.34437	1.28452	NA	5.09499	2.53595	2.65942	0.967201	3.58965	9.18848	2.28038	3.83918	1.21565	3.77855	4.57507	1	0.674803	Firmicutes bacterium CAG:110_msp_0312	unclassified Firmicutes	unclassified Firmicutes	unclassified Firmicutes	unclassified Firmicutes	Firmicutes	Bacteria
msp_0313	0.00575901	0.00274309	0.0357762	23	0.000124891	5.05645e-05	9.831e-12	80.8163	5.21276	5.08174	4.14156	2.60293	4.08067	4.23284	5.1249	4.29606	NA	5.17381	4.5736	5.53619	3.44598	3.20812	4.61464	5.35791	4.76041	1.14744	5.18737	5.5445	1.70487	5.12603	5.2263	5.17466	4.65745	1	0.34497	Veillonella parvula_msp_0313	Veillonella	Veillonellaceae	Veillonellales	Negativicutes	Firmicutes	Bacteria
msp_0314	0.000210296	0.000333807	0.528699	23	1.04771e-07	4.48033e-07	0.0252428	3.9104	1.0407	1.00936	0.888478	13.619	0.893294	5.08862	35.3792	3.03116	NA	6.48965	20.2458	2.26282	0.253221	0.16106	0.863751	0.504444	0.481835	0.0512628	0.567738	5.47814	0.558672	0.447181	0.577738	0.320746	0.826887	1	0.889367	unclassified Clostridiales_msp_0314	unclassified Clostridiales	unclassified Clostridiales	Clostridiales	Clostridia	Firmicutes	Bacteria
msp_0315	0.000814547	0.000496297	0.100746	23	1.4183e-06	1.26403e-06	0.101685	39.3215	1.64803	1.96572	2.53598	14.2319	4.17879	7.28942	12.668	5.50742	NA	9.41335	14.577	5.15124	0.176488	0.29911	2.63488	1.45156	0.812915	0.159951	1.45798	7.25944	1.64672	1.5471	0.75208	1.23108	3.0518	1	0.517683	Firmicutes bacterium CAG:145_msp_0315	unclassified Firmicutes	unclassified Firmicutes	unclassified Firmicutes	unclassified Firmicutes	Firmicutes	Bacteria
msp_0316	-4.14485e-05	0.000329107	0.899778	19	1.07248e-06	6.16874e-07	0.00181734	80.7941	5.20674	9.69615	3.88409	3.92978	2.10718	4.68554	5.26922	4.59257	NA	5.16287	1.87403	9.41454	0.902367	NA	7.65484	2.71306	3.40195	NA	8.85544	9.82109	NA	8.7203	2.61867	NA	4.69632	1	0.977649	unclassified Parabacteroides_msp_0316	Parabacteroides	Tannerellaceae	Bacteroidales	Bacteroidia	Bacteroidetes	Bacteria
msp_0317	0.00281054	0.000854054	0.000998937	22	8.3526e-06	4.37829e-06	7.87091e-06	81.4004	5.37646	5.9646	5.43885	8.49071	4.1957	7.64055	8.55291	7.26466	NA	7.54707	7.46044	6.22627	2.70893	1.55577	2.62929	2.87171	3.05332	0.374028	2.0313	6.9854	NA	2.22098	1.65881	1.44384	3.68485	1	0.0397453	unclassified Clostridiales_msp_0317	unclassified Clostridiales	unclassified Clostridiales	Clostridiales	Clostridia	Firmicutes	Bacteria
msp_0318	0.00149867	0.00137727	0.276531	22	2.65777e-05	1.24365e-05	1.82785e-08	72.8443	3.68247	6.17103	4.91697	4.07188	2.54897	4.84471	6.18341	5.45825	NA	5.95959	4.20899	5.9456	2.28433	NA	4.86201	3.67149	4.28373	1.50963	4.52485	6.54349	3.39497	4.86197	3.44484	4.81464	5.49465	1	0.719022	Alistipes indistinctus_msp_0318	Alistipes	Rikenellaceae	Bacteroidales	Bacteroidia	Bacteroidetes	Bacteria
msp_0319	-0.000545445	0.000447798	0.223201	22	3.50051e-07	8.80045e-07	0.254629	8.5789	1.09384	2.49769	2.86439	27.0926	0.868812	3.28362	9.71633	2.01283	NA	6.82793	2.11369	2.15411	0.709848	NA	1.58557	0.740179	0.599435	0.260354	2.01135	19.6957	0.717868	1.69203	0.201457	1.35512	10.9991	1	0.693351	unclassified Clostridiales_msp_0319	unclassified Clostridiales	unclassified Clostridiales	Clostridiales	Clostridia	Firmicutes	Bacteria
msp_0320	-0.000447961	0.00127436	0.7252	9	7.75897e-06	6.65323e-06	0.385345	76.3499	4.22832	20.7669	16.0626	NA	NA	NA	NA	NA	NA	NA	NA	10.815	NA	NA	4.94679	NA	15.1727	NA	5.90973	17.6969	NA	6.91601	1.71341	NA	NA	1	0.94558	unclassified Prevotella_msp_0320	Prevotella	Prevotellaceae	Bacteroidales	Bacteroidia	Bacteroidetes	Bacteria
msp_0321	-0.000445331	0.000621843	0.4739	11	2.10587e-06	1.69452e-06	0.298859	69.0736	3.23349	9.977	14.1375	NA	NA	NA	NA	NA	NA	NA	16.6588	4.51252	NA	NA	16.5835	14.0672	8.91072	NA	NA	NA	NA	2.45188	0.947365	4.06444	7.68902	1	0.852413	Clostridium sp. CAG:411_msp_0321	unclassified Clostridiales	unclassified Clostridiales	Clostridiales	Clostridia	Firmicutes	Bacteria
msp_0322	-0.000908359	0.000539869	0.0924615	20	0	1.04393e-06	0.448029	0	1	0.752282	0.892395	38.015	0.529802	1.32682	2.07875	0.74865	NA	1.52679	0.551606	2.47972	NA	NA	1.56023	0.626888	0.232682	0.183979	2.00215	10.9399	0.13477	1.38172	NA	0.912026	33.1239	1	0.500213	unclassified Ruminococcus_msp_0322	Ruminococcus	Ruminococcaceae	Clostridiales	Clostridia	Firmicutes	Bacteria
msp_0323	-0.000195282	8.3241e-05	0.0189769	20	0	3.14992e-08	0.920091	0	1	0.75806	5.07353	NA	0.749587	0.520502	5.13922	2.62977	NA	63.4595	14.0796	0.426871	NA	NA	1.94251	0.187369	0.0754602	0.0422655	1.25162	1.58536	1.16446	0.107845	0.0141284	0.445291	0.347041	1	0.233145	unclassified Clostridium_msp_0323	Clostridium	Clostridiaceae	Clostridiales	Clostridia	Firmicutes	Bacteria
msp_0324	-0.0010628	0.000973169	0.27479	22	1.06259e-05	6.10598e-06	0.0003071	58.5039	2.40987	6.01936	4.05447	3.86848	2.41709	5.13138	6.5072	5.03533	NA	6.16967	3.55624	6.51855	4.50868	NA	5.42881	3.86392	3.95786	1.60949	4.19023	7.78799	2.13958	4.74301	1.80249	4.25815	6.43202	1	0.719022	Faecalibacterium prausnitzii 7_msp_0324	Faecalibacterium	Ruminococcaceae	Clostridiales	Clostridia	Firmicutes	Bacteria
msp_0325	-0.00175563	0.000943893	0.0628875	23	0	5.02475e-06	0.632504	0	1	4.84241	3.77449	5.6467	1.42245	3.53424	9.12441	4.19347	NA	8.4737	2.80652	9.4122	3.15847	0.696941	4.24705	2.60541	2.49235	0.436191	1.75796	16.7033	1.28825	4.55721	1.2563	3.89282	3.6771	1	0.43342	Ruminococcus sp. UNK.MGS-30_msp_0325	Ruminococcus	Ruminococcaceae	Clostridiales	Clostridia	Firmicutes	Bacteria
msp_0326	-1.6408e-06	0.000136511	0.99041	16	5.85188e-08	8.31422e-08	0.174342	23.4109	1.30567	NA	0.496904	2.3298	0.487248	0.61395	4.4314	1.62934	NA	1.09348	0.372571	15.9272	NA	NA	17.2118	3.89408	10.9539	NA	11.461	16.9686	NA	NA	NA	5.76448	6.36418	1	0.996671	unclassified Alistipes_msp_0326	Alistipes	Rikenellaceae	Bacteroidales	Bacteroidia	Bacteroidetes	Bacteria
msp_0327	-0.000223547	0.000178136	0.209506	14	0	8.46335e-07	0.877813	0	1	0.492644	NA	NA	NA	NA	NA	NA	NA	NA	NA	0.251108	0.0137773	NA	0.341418	1.05572	0.0583578	0.0426224	1.43727	95.6333	0.105601	0.419973	0.0757574	0.0510283	0.0214302	1	0.680465	Bacteroides sp. CAG:545_msp_0327	Bacteroides	Bacteroidaceae	Bacteroidales	Bacteroidia	Bacteroidetes	Bacteria
msp_0328	-0.000383937	0.000451507	0.395133	13	6.47712e-07	8.85725e-07	0.0442641	31.4235	1.45823	11.6698	NA	NA	NA	NA	NA	NA	NA	NA	NA	9.3433	NA	NA	9.99361	3.53272	2.2039	0.191799	2.02095	28.4828	4.1066	10.4551	1.35966	11.2327	5.40712	1	0.803726	Brachyspira sp. CAG:484_msp_0328	Brachyspira	Brachyspiraceae	Brachyspirales	Spirochaetia	Spirochaetes	Bacteria
msp_0329	0.000166784	0.000185441	0.368445	11	9.91202e-08	1.44531e-07	0.336814	32.6095	1.48389	14.2254	5.68989	0.952684	NA	7.83623	1.47769	3.94504	NA	10.535	NA	31.836	NA	NA	7.06761	NA	NA	NA	NA	11.1402	NA	NA	NA	5.29421	NA	1	0.781539	Clostridium butyricum_msp_0329	Clostridium	Clostridiaceae	Clostridiales	Clostridia	Firmicutes	Bacteria
msp_0330	-0.00047193	0.000567586	0.405709	10	1.25544e-06	1.35082e-06	0.107453	56.2037	2.2833	15.9096	NA	NA	NA	NA	NA	NA	NA	NA	NA	7.97083	NA	NA	7.02542	3.15801	17.4368	NA	NA	25.4764	4.60843	3.84192	NA	5.88744	8.68514	1	0.808534	Firmicutes bacterium CAG:534_msp_0330	unclassified Firmicutes	unclassified Firmicutes	unclassified Firmicutes	unclassified Firmicutes	Firmicutes	Bacteria
msp_0331	0.00590055	0.00243445	0.0153602	23	8.66369e-05	3.88876e-05	1.82422e-09	74.9452	3.99126	5.42519	4.91502	3.94235	3.649	5.57308	5.99435	5.09415	NA	5.78593	3.89642	6.08545	1.86206	0.35091	5.25604	4.69159	4.24719	1.21486	4.5229	6.33753	2.97564	4.86234	2.61669	5.21236	5.48897	1	0.208924	Oscillibacter sp. KLE 1728 _msp_0331	Oscillibacter	Oscillospiraceae	Clostridiales	Clostridia	Firmicutes	Bacteria
msp_0332	-0.00121873	0.00123942	0.325457	2	1.37208e-06	1.60742e-05	0.286226	12.0716	1.13729	NA	NA	NA	NA	NA	NA	NA	NA	NA	NA	92.7111	NA	NA	NA	NA	NA	NA	NA	NA	NA	NA	7.2889	NA	NA	1	0.761839	unclassified Clostridiales_msp_0332	unclassified Clostridiales	unclassified Clostridiales	Clostridiales	Clostridia	Firmicutes	Bacteria
msp_0333	-0.000382153	0.00033461	0.253419	19	4.58121e-07	5.32626e-07	0.32698	28.1262	1.39133	14.4116	4.35016	10.326	1.85449	1.55651	9.36472	1.34487	NA	1.82587	13.3591	1.37216	NA	NA	1.67591	2.17149	2.44641	NA	8.51668	17.9501	0.288262	1.49106	0.212239	5.48234	NA	1	0.707423	Lactobacillus ruminis_msp_0333	Lactobacillus	Lactobacillaceae	Lactobacillales	Bacilli	Firmicutes	Bacteria
msp_0334	0.000502529	0.000501917	0.316721	22	2.01892e-06	1.46268e-06	0.0789994	46.208	1.85901	2.635	5.51268	1.52612	2.90552	2.53597	8.92808	5.45665	NA	6.50495	NA	9.13283	0.699353	0.0391702	5.93634	8.90567	9.24719	1.76914	7.83956	7.47411	1.55415	3.33106	3.84574	1.50914	2.71159	1	0.751168	Erysipelotrichaceae bacterium 5_2_54FAA _msp_0334	unclassified Erysipelotrichaceae	Erysipelotrichaceae	Erysipelotrichales	Erysipelotrichia	Firmicutes	Bacteria
msp_0335	0.000374529	0.000734967	0.610341	22	3.30644e-06	2.99176e-06	0.191	35.5414	1.55138	3.64264	8.81423	8.7564	3.65732	9.92238	10.6319	7.54771	NA	12.478	5.31508	4.43494	0.20787	NA	2.83558	1.97587	1.54983	0.369291	2.12084	5.73822	0.898132	3.14076	2.17667	0.895483	2.89087	1	0.918065	unclassified Alistipes_msp_0335	Alistipes	Rikenellaceae	Bacteroidales	Bacteroidia	Bacteroidetes	Bacteria
msp_0336	0.000207322	0.000369856	0.575105	15	0	6.16693e-07	0.603363	0	1	5.39295	11.8031	NA	NA	11.9305	12.1992	9.3017	NA	9.663	0.684517	5.77758	NA	NA	1.34498	1.86897	2.80514	0.0939407	1.61543	22.9164	NA	NA	NA	2.60253	NA	1	0.900763	Bacteroides fluxus_msp_0336	Bacteroides	Bacteroidaceae	Bacteroidales	Bacteroidia	Bacteroidetes	Bacteria
msp_0337	-0.000693083	0.0017174	0.686532	23	4.0279e-05	1.93683e-05	0.000224975	72.5763	3.64649	3.94502	4.73387	4.85864	3.39286	5.371	6.17652	5.28544	NA	6.13363	6.95141	6.14872	3.06021	1.90724	4.92981	3.3979	3.86239	1.08451	4.52063	6.46165	1.96695	4.0126	1.91116	4.64819	5.23966	1	0.930503	Eubacterium sp. 38_16 _msp_0337	Eubacterium	Eubacteriaceae	Clostridiales	Clostridia	Firmicutes	Bacteria
msp_0338	0.00146457	0.00161578	0.364714	16	1.97765e-05	1.29185e-05	0.048426	86.2562	7.27603	12.7505	2.34709	1.18357	0.322719	1.46266	2.28721	9.56672	NA	4.98165	1.19132	NA	NA	NA	6.75469	10.992	NA	11.9635	7.20631	5.92095	NA	NA	NA	7.90517	13.164	1	0.781434	Fusobacterium mortiferum_msp_0338	Fusobacterium	Fusobacteriaceae	Fusobacteriales	Fusobacteriia	Fusobacteria	Bacteria
msp_0339	0.000313863	0.000292236	0.28282	16	0	3.25033e-07	0.77937	0	1	NA	1.98736	0.29751	0.37721	0.85083	0.103682	0.546746	NA	3.57584	0.0115597	6.93374	NA	NA	7.27315	36.2474	3.32354	NA	3.04116	26.7553	NA	8.58527	NA	NA	0.0896577	1	0.722895	unclassified Prevotella_msp_0339	Prevotella	Prevotellaceae	Bacteroidales	Bacteroidia	Bacteroidetes	Bacteria
msp_0340	0.00169826	0.00145722	0.243851	23	2.70221e-05	1.37245e-05	6.93678e-05	69.1956	3.24629	5.7013	4.99725	5.21061	3.07198	4.23065	7.38144	6.20822	NA	6.61556	5.39419	6.26187	1.93744	0.539245	4.33462	4.37293	3.61239	1.14433	3.27414	6.92966	2.77749	4.02077	2.12393	4.79761	5.0624	1	0.707239	Clostridium leptum_msp_0340	Ruminiclostridium	Ruminococcaceae	Clostridiales	Clostridia	Firmicutes	Bacteria
msp_0341	-9.55225e-06	0.000151102	0.949594	19	0	9.24736e-08	0.457131	0	1	0.708012	1.21144	0.416843	10.8565	0.981506	3.8304	0.613581	NA	6.24332	2.69351	35.9882	NA	NA	0.694707	NA	0.635436	NA	1.11307	1.81595	0.78547	4.62337	0.101086	21.2694	5.41824	1	0.985644	Klebsiella michiganensis 2_msp_0341	Klebsiella	Enterobacteriaceae	Enterobacterales	Gammaproteobacteria	Proteobacteria	Bacteria
msp_0342	0.00103861	0.00113453	0.359951	23	6.35947e-06	7.53941e-06	0.171095	24.2507	1.32014	9.56789	4.24065	2.8663	1.46872	4.99412	6.24045	5.62625	NA	7.8752	3.04281	12.3552	0.409771	0.216851	3.81557	3.73914	3.95132	0.322651	3.12945	8.52027	1.18909	6.64571	3.89101	3.21153	2.67999	1	0.781434	Flavonifractor sp. 2789STDY5834931_msp_0342	Flavonifractor	unclassified Clostridiales	Clostridiales	Clostridia	Firmicutes	Bacteria
msp_0343	0.000313966	0.000405432	0.438695	19	3.43979e-07	7.12807e-07	0.0852697	12.4331	1.14198	12.3857	7.9756	NA	0.630202	30.8875	12.4686	2.05675	NA	6.32597	8.40456	1.44347	0.0703205	NA	1.21863	1.03554	1.17798	NA	1.91965	9.04323	0.647147	0.677174	0.261706	1.37037	NA	1	0.829578	Clostridium sp. CAG:413_msp_0343	unclassified Clostridiales	unclassified Clostridiales	Clostridiales	Clostridia	Firmicutes	Bacteria
msp_0344	2.28324e-06	0.000199192	0.990854	15	5.39007e-08	1.5339e-07	0.188814	9.42869	1.1041	7.30803	NA	NA	11.2926	NA	23.5303	NA	NA	26.6809	7.71408	0.4771	NA	NA	0.736076	0.546587	0.210006	0.272133	NA	16.3826	0.114814	0.514476	0.147135	NA	4.07321	1	0.996671	Anaerotruncus sp. CAG:390_msp_0344	Anaerotruncus	Ruminococcaceae	Clostridiales	Clostridia	Firmicutes	Bacteria
msp_0345	-0.00267243	0.00176002	0.128912	22	1.95477e-05	1.81726e-05	0.0681721	34.7621	1.53285	5.02253	3.46829	4.5647	0.963118	5.30306	4.39469	4.12899	NA	5.9414	2.06797	5.57553	11.9158	NA	4.41868	1.78717	1.49017	1.44403	8.34245	11.2517	4.72705	4.44335	0.868106	6.21185	1.66931	1	0.568938	unclassified Faecalibacterium_msp_0345	Faecalibacterium	Ruminococcaceae	Clostridiales	Clostridia	Firmicutes	Bacteria
msp_0346	-0.00415896	0.00254878	0.102732	23	8.92218e-05	4.25911e-05	5.62405e-07	69.879	3.31995	5.31432	5.06924	3.99232	4.17539	5.49222	6.04946	5.72941	NA	6.10193	4.25378	6.45526	2.04647	0.489039	5.40539	4.04994	4.2226	1.25689	4.62537	6.42178	2.45538	4.64337	2.56917	4.50828	4.67297	1	0.519704	Clostridium sp. CAG:43_msp_0346	unclassified Clostridiales	unclassified Clostridiales	Clostridiales	Clostridia	Firmicutes	Bacteria
msp_0347	-5.02436e-05	0.000192376	0.793958	23	0	1.60948e-07	0.104223	0	1	1.15253	20.0323	0.360913	21.2881	1.05256	1.04562	1.76384	NA	3.59417	19.1186	8.30281	0.480151	0.0117615	2.2121	4.05509	1.24399	0.106646	3.36598	3.3061	0.679749	1.51798	0.178359	0.487871	4.64274	1	0.963466	Clostridium paraputrificum_msp_0347	Clostridium	Clostridiaceae	Clostridiales	Clostridia	Firmicutes	Bacteria
msp_0348	-0.000877011	0.00030173	0.00365369	22	2.83679e-07	4.60007e-07	0.538401	16.0823	1.19164	2.8057	5.69453	14.7404	5.48591	5.73803	11.8429	3.64419	NA	12.8829	4.49356	2.00245	2.3795	NA	1.41398	0.521315	0.693332	0.120244	1.85608	13.6139	0.808128	1.07654	0.291694	0.999778	6.89484	1	0.0860356	unclassified Firmicutes_msp_0348	unclassified Firmicutes	unclassified Firmicutes	unclassified Firmicutes	unclassified Firmicutes	Firmicutes	Bacteria
msp_0349	0.000344275	0.000753491	0.647738	10	1.21627e-06	2.10385e-06	0.178396	28.1197	1.3912	NA	NA	NA	NA	26.895	NA	NA	NA	NA	NA	5.04563	3.69813	NA	6.87678	5.78228	2.23815	0.304381	8.35543	39.9203	NA	NA	0.883906	NA	NA	1	0.9275	Bacteroides sp. An19 _msp_0349	Bacteroides	Bacteroidaceae	Bacteroidales	Bacteroidia	Bacteroidetes	Bacteria
msp_0350	0.000299488	0.000103289	0.00373758	19	0	4.76385e-08	0.740725	0	1	6.49176	8.1848	0.586991	1.25838	7.76491	6.63465	6.47078	NA	7.4164	NA	40.2439	0.197462	NA	0.552077	1.47025	3.00972	1.04291	0.592492	0.811882	NA	4.04353	NA	1.43765	1.78945	1	0.0869756	Fournierella massiliensis_msp_0350	Fournierella	Ruminococcaceae	Clostridiales	Clostridia	Firmicutes	Bacteria
msp_0351	-0.000171293	0.000426487	0.687951	9	1.00314e-06	7.6819e-07	0.000105728	78.8693	4.73245	NA	NA	NA	NA	10.8673	16.5686	NA	NA	NA	NA	11.9483	NA	NA	11.1847	5.23413	1.60676	NA	NA	17.298	NA	NA	15.1599	NA	10.1323	1	0.930503	unclassified Bacteroides_msp_0351	Bacteroides	Bacteroidaceae	Bacteroidales	Bacteroidia	Bacteroidetes	Bacteria
msp_0352	0.000205287	0.000993336	0.836272	22	5.68644e-06	5.06553e-06	0.0247651	37.6448	1.60372	2.40659	1.47431	4.58719	9.02913	13.9856	12.3927	7.06227	NA	9.05787	9.22249	3.69752	1.74474	NA	1.48247	0.66029	1.3665	0.196507	3.18438	12.3458	0.872145	1.28496	0.306774	1.20826	2.43154	1	0.969276	Oscillibacter sp. CAG:241_msp_0352	Oscillibacter	Oscillospiraceae	Clostridiales	Clostridia	Firmicutes	Bacteria
msp_0353	-0.000918111	0.000457766	0.0448953	23	2.13468e-06	1.23149e-06	0.00540232	64.8743	2.84692	8.27628	6.80721	8.85332	1.68602	8.64205	7.32713	5.00548	NA	7.71101	4.1059	5.11122	0.89151	0.569234	4.28857	1.9197	1.69704	0.432345	3.45501	8.59645	1.22894	6.64238	0.546914	2.42306	3.78323	1	0.371244	unclassified_msp_0353	unclassified	unclassified	unclassified	unclassified	unclassified	unclassified
msp_0354	8.33953e-05	0.000181057	0.645084	16	1.55009e-07	1.41419e-07	0.227136	53.724	2.16095	2.33406	11.2101	NA	11.4073	13.1893	NA	NA	NA	17.4275	NA	2.76926	NA	NA	2.63479	0.457809	0.996148	0.124539	11.0151	20.4	0.672758	1.01197	0.145513	4.20392	NA	1	0.9275	unclassified Firmicutes_msp_0354	unclassified Firmicutes	unclassified Firmicutes	unclassified Firmicutes	unclassified Firmicutes	Firmicutes	Bacteria
msp_0355	-0.000159419	0.000460888	0.729422	7	4.00096e-07	7.72923e-07	0.223287	29.3491	1.41541	NA	NA	10.512	NA	38.3073	3.74038	NA	NA	NA	NA	NA	NA	NA	17.6073	NA	NA	NA	3.20214	NA	5.43983	21.191	NA	NA	NA	1	0.947338	unclassified Bacteroides_msp_0355	Bacteroides	Bacteroidaceae	Bacteroidales	Bacteroidia	Bacteroidetes	Bacteria
msp_0356	0.00117177	0.00197338	0.552654	23	4.53307e-05	2.52183e-05	7.15726e-05	58.6867	2.42053	5.5857	4.52089	5.40065	3.26858	5.66225	7.03346	5.63764	NA	6.20621	4.4888	6.30457	1.35097	0.568449	5.25467	4.07849	3.79254	1.0117	4.28091	7.15332	2.47723	4.52335	2.66551	4.54027	4.19385	1	0.891291	unclassified Clostridiales_msp_0356	unclassified Clostridiales	unclassified Clostridiales	Clostridiales	Clostridia	Firmicutes	Bacteria
msp_0357	0.00222088	0.00135621	0.101512	22	2.32501e-05	1.15486e-05	0.000132754	73.294	3.74447	4.61272	4.88462	6.65707	6.78381	5.54446	7.26602	5.69343	NA	6.9299	6.87342	6.09513	1.2586	NA	4.54672	3.14956	3.4983	0.553501	3.42811	7.12616	1.85028	3.87812	1.74653	3.4329	4.19065	1	0.517683	Clostridium sp. CAG:169_msp_0357	unclassified Clostridiales	unclassified Clostridiales	Clostridiales	Clostridia	Firmicutes	Bacteria
msp_0358	0.000251039	0.000194582	0.197	6	9.26052e-08	1.33729e-07	0.196201	50.4271	2.01723	NA	NA	NA	NA	NA	NA	NA	NA	NA	NA	22.2321	NA	NA	19.3436	NA	NA	NA	NA	40.1261	NA	3.74184	NA	6.17391	8.3825	1	0.667073	unclassified Eubacterium_msp_0358	Eubacterium	Eubacteriaceae	Clostridiales	Clostridia	Firmicutes	Bacteria
msp_0359	-0.00041178	0.00032314	0.202554	20	4.19987e-07	5.30376e-07	0.35048	27.1424	1.37254	2.48002	4.74694	4.89802	5.14607	6.92183	22.7849	6.39657	NA	8.01586	3.85891	2.19005	0.213656	NA	0.690292	0.964357	2.34814	0.430312	1.60085	3.01126	NA	6.06582	NA	7.00615	10.23	1	0.671109	Mitsuokella jalaludinii_msp_0359	Mitsuokella	Selenomonadaceae	Selenomonadales	Negativicutes	Firmicutes	Bacteria
msp_0360	0.00187142	0.000590239	0.00152119	23	2.38609e-06	2.12016e-06	0.0427826	34.1413	1.5184	5.39209	4.71437	2.14672	2.36383	5.78379	8.03663	6.1647	NA	7.06948	4.26507	9.34609	2.10736	0.544347	5.15374	1.34683	4.05836	0.321775	4.51296	9.38244	1.47751	5.07518	1.44633	4.08041	5.21001	1	0.050982	Clostridium asparagiforme == lavalense_msp_0360	Lachnoclostridium	Lachnospiraceae	Clostridiales	Clostridia	Firmicutes	Bacteria
msp_0361	-0.000899186	0.000472616	0.0570961	22	4.19892e-07	1.09895e-06	0.426786	9.01296	1.09906	4.4346	3.42195	7.75961	1.28497	6.03736	11.4345	3.83038	NA	9.45219	1.05584	1.71005	0.331641	NA	2.68934	0.563684	0.914849	1.28872	2.71246	17.8209	1.62774	1.10494	0.785299	2.85752	16.8814	1	0.410117	Firmicutes bacterium CAG:170_msp_0361	unclassified Firmicutes	unclassified Firmicutes	unclassified Firmicutes	unclassified Firmicutes	Firmicutes	Bacteria
msp_0362	-0.000249269	0.000638777	0.696368	22	1.73353e-06	2.40861e-06	0.195039	20.7949	1.26254	2.75103	4.15496	4.56788	4.79039	4.33668	7.70526	5.46258	NA	8.37862	NA	8.18898	1.49209	0.142222	4.79029	4.25735	1.86274	1.11262	4.54571	10.8305	2.62557	3.31837	0.772838	4.36641	9.54687	1	0.931945	Clostridium saudiense_msp_0362	Clostridium	Clostridiaceae	Clostridiales	Clostridia	Firmicutes	Bacteria
msp_0363	-4.26072e-05	0.000121116	0.724997	20	1.00597e-08	6.84182e-08	0.201456	3.32501	1.03439	NA	1.17744	15.5831	7.64724	2.83292	3.94861	5.25656	NA	1.09795	3.17062	1.08171	0.258072	NA	1.27605	2.68616	1.57262	1.17831	0.704429	12.9685	4.01317	8.89248	NA	1.67657	22.9775	1	0.94558	unclassified Bacteroides_msp_0363	Bacteroides	Bacteroidaceae	Bacteroidales	Bacteroidia	Bacteroidetes	Bacteria
msp_0364	0.00171885	0.000882547	0.0514621	23	9.68685e-06	5.0681e-06	3.45793e-05	63.2582	2.72169	6.6743	4.48931	5.54125	2.65082	5.60159	6.41882	5.81082	NA	6.00701	3.58445	6.15141	2.2536	0.237623	5.31854	3.80183	4.44889	1.15937	4.30762	6.88642	4.04928	3.91509	2.91724	3.66576	4.10896	1	0.393019	Intestinimonas butyriciproducens_msp_0364	Intestinimonas	unclassified Clostridiales	Clostridiales	Clostridia	Firmicutes	Bacteria
msp_0365	0.000515749	0.000341556	0.131043	16	8.23813e-07	6.05155e-07	0.0106206	62.1795	2.64407	5.89433	6.26577	NA	9.74692	5.07461	13.5758	NA	NA	10.8604	NA	11.2408	NA	0.11956	4.29169	2.53743	3.66025	2.23004	2.45847	6.80801	NA	7.37533	NA	NA	7.86058	1	0.568938	unclassified Lachnospiraceae_msp_0365	unclassified Lachnospiraceae	Lachnospiraceae	Clostridiales	Clostridia	Firmicutes	Bacteria
msp_0366	8.35362e-05	0.000187513	0.655962	16	1.07011e-07	1.38336e-07	0.320488	27.1781	1.37321	24.3897	0.261513	0.116384	0.0809925	0.197587	0.822165	1.62136	NA	0.502897	1.26959	13.7521	NA	NA	2.74994	9.1525	NA	NA	19.3621	1.3715	NA	NA	NA	4.36476	19.9849	1	0.928181	unclassified Caecibacter_msp_0366	Caecibacter	Veillonellaceae	Veillonellales	Negativicutes	Firmicutes	Bacteria
msp_0367	-0.000415025	0.000209543	0.0476336	18	0	1.64385e-07	0.675243	0	1	4.40374	15.4041	NA	0.780291	NA	27.4989	1.90063	NA	9.71241	2.11028	1.06035	0.599161	NA	0.714351	0.273139	0.588216	NA	0.54707	31.5297	1.27704	1.03015	0.0627064	0.507748	NA	1	0.378391	Ruminococcus champanellensis_msp_0367	Ruminococcus	Ruminococcaceae	Clostridiales	Clostridia	Firmicutes	Bacteria
msp_0368c	-3.13294e-05	0.000147718	0.832037	8	4.28961e-08	8.02909e-08	0.163368	27.4929	1.37918	NA	NA	8.77875	NA	NA	2.35469	NA	NA	33.6491	6.18717	NA	NA	NA	18.977	NA	NA	NA	1.43583	6.0292	NA	NA	NA	22.5883	NA	1	0.969276	Aeromonas veronii_msp_0368c	Aeromonas	Aeromonadaceae	Aeromonadales	Gammaproteobacteria	Proteobacteria	Bacteria
msp_0369	0.000832072	0.000662517	0.209143	21	2.62434e-06	2.43953e-06	0.141823	35.4849	1.55002	4.60373	3.71691	11.5012	2.92175	2.77515	6.74232	1.90196	NA	5.55945	3.62578	7.00313	NA	NA	2.33444	1.43505	3.15321	0.296837	1.21135	12.3006	9.63363	9.75898	0.62732	3.67511	5.22206	1	0.680415	unclassified_msp_0369	unclassified	unclassified	unclassified	unclassified	unclassified	unclassified
msp_0370	0.000248833	0.000237582	0.294934	17	8.43406e-08	2.01538e-07	0.201057	9.71104	1.10756	1.02709	NA	39.0928	NA	NA	NA	NA	NA	22.4156	22.1128	4.00544	0.52828	NA	1.35787	0.9551	0.808697	0.14219	0.551636	3.29401	0.898704	0.704519	0.310954	0.771888	1.02239	1	0.730433	Anaeromassilibacillus sp. Marseille-P3371 _msp_0370	Anaeromassilibacillus	Ruminococcaceae	Clostridiales	Clostridia	Firmicutes	Bacteria
msp_0371	-8.98662e-05	0.000370124	0.80816	6	1.77289e-07	4.47026e-07	0.258747	22.3715	1.28819	30.7886	NA	NA	NA	NA	NA	NA	NA	NA	NA	10.8235	NA	NA	NA	30.2137	1.34639	NA	NA	NA	NA	26.7503	0.077573	NA	NA	1	0.963879	unclassified Roseburia_msp_0371	Roseburia	Lachnospiraceae	Clostridiales	Clostridia	Firmicutes	Bacteria
msp_0372	0.000120444	0.000217936	0.580496	20	2.27539e-07	2.38248e-07	0.069051	30.0155	1.42889	6.39142	2.2119	10.6081	11.158	10.5488	12.6819	5.46949	NA	8.16823	NA	7.31419	0.624738	NA	3.10314	0.301529	2.32622	0.095669	2.13938	13.2198	NA	0.864095	0.312402	1.00187	1.45903	1	0.901272	unclassified_msp_0372	unclassified	unclassified	unclassified	unclassified	unclassified	unclassified
msp_0373	-0.000645081	0.000443888	0.146154	22	1.07876e-08	1.00893e-06	0.558362	0.237086	1.00238	5.35646	4.11779	3.76589	1.59829	4.40092	17.999	4.06168	NA	12.3796	6.23442	4.65899	0.832125	NA	2.6825	1.60876	1.30086	0.473559	2.4444	15.7012	2.34169	1.94663	0.402049	2.90289	2.79021	1	0.598079	Clostridium sp. 2789STDY5608884_msp_0373	unclassified Clostridiales	unclassified Clostridiales	Clostridiales	Clostridia	Firmicutes	Bacteria
msp_0374	-0.00832587	0.00405076	0.039842	23	0.000218813	0.000108755	1.84331e-05	66.4614	2.98164	5.00837	5.05447	3.94314	3.27784	5.43318	6.15791	5.62416	NA	6.24607	4.19037	6.0659	2.13831	3.09609	5.36965	3.4972	3.65714	2.13332	5.08587	6.5688	2.42225	4.68748	1.35449	4.52634	4.46164	1	0.356595	Gemmiger formicilis_msp_0374	Gemmiger	Ruminococcaceae	Clostridiales	Clostridia	Firmicutes	Bacteria
msp_0375	0.000189066	0.000494029	0.70194	22	1.04659e-07	9.49123e-07	0.0701946	1.70849	1.01738	1.15947	6.90928	35.133	0.503883	26.1514	2.6444	6.97211	NA	6.10515	0.616597	1.414	0.0952365	NA	0.769725	0.228412	0.461972	0.064483	0.921008	7.60162	0.154805	0.717212	0.104708	0.763191	0.508302	1	0.935605	Rhodospirillum sp. UNK.MGS-17 _msp_0375	unclassified Rhodospirillaceae	Rhodospirillaceae	Rhodospirillales	Alphaproteobacteria	Proteobacteria	Bacteria
msp_0376	-0.000294071	0.000789673	0.709598	18	4.12054e-06	3.04234e-06	0.039627	94.2864	17.5022	5.65245	NA	NA	NA	15.0059	14.9074	6.01181	NA	12.5019	NA	4.76589	0.381362	NA	3.22489	2.77281	2.14936	1.09184	4.35303	15.0891	2.33942	3.19195	1.58255	1.59644	3.38188	1	0.938853	Bacteroides pectinophilus_msp_0376	unclassified Clostridiales	unclassified Clostridiales	Clostridiales	Clostridia	Firmicutes	Bacteria
msp_0377	6.04018e-05	0.000446172	0.892313	10	3.88506e-07	7.12452e-07	0.530944	24.2569	1.32025	NA	NA	NA	NA	NA	NA	12.9089	NA	31.4214	NA	2.37538	NA	NA	1.36832	NA	1.44403	7.80784	NA	34.3786	NA	6.66124	0.812318	0.822005	NA	1	0.977649	Bacteroides barnesiae_msp_0377	Bacteroides	Bacteroidaceae	Bacteroidales	Bacteroidia	Bacteroidetes	Bacteria
msp_0378	-0.00228512	0.00134255	0.0887397	23	2.12142e-05	1.16316e-05	0.000595372	60.4235	2.52675	5.15179	4.5944	2.23095	2.71222	5.41621	6.79531	5.35318	NA	6.36797	4.91806	6.37993	3.26576	0.419814	5.12767	3.46411	3.86366	0.949655	4.35633	7.29077	3.14374	3.92901	2.1474	5.52137	6.60069	1	0.493364	Eubacterium sp. CAG:156_msp_0378	Eubacterium	Eubacteriaceae	Clostridiales	Clostridia	Firmicutes	Bacteria
msp_0379	0.000528042	0.00034835	0.129561	19	5.98679e-07	5.64212e-07	0.042605	52.7828	2.11787	1.74812	2.18345	2.55018	NA	8.80917	18.1382	14.2073	NA	19.2981	NA	8.95088	2.34173	NA	2.35754	1.93559	1.01692	0.774383	0.848876	5.10927	0.976743	1.61677	NA	3.92623	3.21052	1	0.568938	Merdimonas faecis_msp_0379	Merdimonas	Lachnospiraceae	Clostridiales	Clostridia	Firmicutes	Bacteria
msp_0380	0.00536792	0.00363581	0.139835	23	0.000191933	8.748e-05	7.53826e-09	73.21	3.73274	5.13715	4.91296	4.32439	3.43604	5.96338	5.49697	5.42626	NA	5.87723	5.94865	5.77202	1.29954	1.57039	4.99039	3.44871	4.41165	1.40158	4.96463	6.23773	4.20915	4.1089	3.09924	4.7649	3.19813	1	0.589612	Streptococcus salivarius_msp_0380	Streptococcus	Streptococcaceae	Lactobacillales	Bacilli	Firmicutes	Bacteria
msp_0381	-0.00147759	0.000681559	0.030162	22	3.58271e-06	2.83066e-06	0.0694402	40.3088	1.67529	7.07055	5.61086	5.85249	3.04057	6.36555	8.43206	5.56595	NA	8.24051	3.86789	6.28281	0.718023	NA	4.60032	2.64534	2.1689	0.754821	3.93665	8.99431	2.21963	3.97983	0.987228	3.362	5.30369	1	0.314002	Alistipes senegalensis_msp_0381	Alistipes	Rikenellaceae	Bacteroidales	Bacteroidia	Bacteroidetes	Bacteria
msp_0382	0.000411051	0.000437737	0.347712	14	1.54567e-06	9.53737e-07	0.0578766	90.9546	11.0553	9.92848	12.1554	NA	NA	NA	NA	NA	NA	NA	NA	8.80038	1.93487	0.240223	7.99762	6.53818	5.89308	4.06757	9.53959	12.3535	3.05288	6.10444	NA	NA	11.3938	1	0.780144	unclassified Lachnospiraceae_msp_0382	unclassified Lachnospiraceae	Lachnospiraceae	Clostridiales	Clostridia	Firmicutes	Bacteria
msp_0383	-0.000574739	0.000687761	0.403342	19	0	2.17344e-06	0.908655	0	1	2.45664	0.495818	3.31828	NA	7.6575	15.0807	1.39591	NA	4.4996	5.09295	4.76357	0.149977	NA	0.960689	2.77636	4.44615	0.243555	1.73981	19.994	0.855203	5.12026	NA	18.953	NA	1	0.808534	Dialister succinatiphilus_msp_0383	Dialister	Veillonellaceae	Veillonellales	Negativicutes	Firmicutes	Bacteria
msp_0384	0.000144727	0.000228729	0.526902	16	1.24169e-07	2.39838e-07	0.0414749	16.3027	1.19478	7.24974	1.74064	11.0544	4.18828	1.5349	4.49659	2.74437	NA	4.81345	9.83802	12.9856	NA	NA	22.241	NA	NA	NA	NA	12.8032	NA	1.96006	0.815578	0.407993	1.12608	1	0.889367	unclassified Firmicutes_msp_0384	unclassified Firmicutes	unclassified Firmicutes	unclassified Firmicutes	unclassified Firmicutes	Firmicutes	Bacteria
msp_0385	0.000359551	0.000663047	0.587632	23	3.65342e-06	2.65234e-06	0.101264	45.1841	1.82429	4.56009	3.99939	9.35176	2.69537	4.52554	6.29374	9.11185	NA	6.87374	2.99572	8.56911	0.794189	0.0920204	5.08998	2.40128	2.83551	0.265218	4.37066	8.12539	5.89138	2.64976	1.87776	3.55654	3.07397	1	0.907367	Ruminococcaceae bacterium D16_msp_0385	unclassified Ruminococcaceae	Ruminococcaceae	Clostridiales	Clostridia	Firmicutes	Bacteria
msp_0386	0.000436863	0.000760497	0.565667	22	1.48198e-06	2.97203e-06	0.309918	12.8023	1.14682	15.0098	4.91537	2.23264	1.29844	2.65741	3.0677	4.12195	NA	4.58924	0.87105	7.14991	1.00558	NA	3.60153	3.20974	1.61405	0.348063	2.38463	10.5295	2.08421	4.25432	19.5948	4.16009	1.29997	1	0.898706	unclassified_msp_0386	unclassified	unclassified	unclassified	unclassified	unclassified	unclassified
msp_0387	-0.000280867	0.000200322	0.160893	18	0	1.86601e-07	0.735205	0	1	5.32203	11.5307	NA	0.142157	3.851	0.703808	2.82171	NA	2.27718	7.60466	10.6023	NA	NA	2.94431	3.41866	7.0461	NA	1.9295	22.0968	0.50524	1.16315	NA	0.898379	15.1423	1	0.620363	Firmicutes bacterium CAG:882_msp_0387	unclassified Firmicutes	unclassified Firmicutes	unclassified Firmicutes	unclassified Firmicutes	Firmicutes	Bacteria
msp_0388	-0.0089672	0.00424576	0.0346835	23	0.000174623	0.000112523	0.00472134	50.0046	2.00018	5.41897	4.76577	3.32137	2.72193	6.20233	7.36422	5.51323	NA	6.82939	3.72713	7.30464	0.698813	0.129445	6.128	3.75766	3.54945	1.05081	4.97613	8.27743	1.90043	4.90896	1.09377	4.84355	5.51658	1	0.340462	Faecalibacterium prausnitzii 3 ( L2-6)_msp_0388	Faecalibacterium	Ruminococcaceae	Clostridiales	Clostridia	Firmicutes	Bacteria
msp_0389	-0.0155612	0.00429475	0.000290863	23	0.000250336	0.000120576	4.17082e-06	69.1295	3.23934	5.3746	5.12373	5.10687	3.7019	5.14073	6.15195	5.69522	NA	6.19325	4.73333	6.24425	2.36459	0.358773	5.45689	3.73106	3.65104	1.78661	4.3263	6.5404	2.19311	4.925	1.9027	3.99267	5.30503	0.575327	0.0164379	Faecalibacterium prausnitzii 4 (cf. KLE1255)_msp_0389	Faecalibacterium	Ruminococcaceae	Clostridiales	Clostridia	Firmicutes	Bacteria
msp_0390	6.66086e-05	0.000258764	0.796861	10	7.03336e-08	2.34431e-07	0.404262	10.5259	1.11764	24.7933	NA	NA	NA	NA	21.4376	3.01727	NA	18.6286	0.0236856	NA	0.151946	NA	NA	NA	NA	0.0415943	0.170805	27.0519	NA	4.68325	NA	NA	NA	1	0.963528	Bacteroides sp. CAG:1076_msp_0390	Bacteroides	Bacteroidaceae	Bacteroidales	Bacteroidia	Bacteroidetes	Bacteria
msp_0391	5.158e-05	0.00018713	0.782826	20	0	1.45725e-07	0.144768	0	1	3.38678	1.18964	NA	1.48743	2.40206	NA	19.6742	NA	9.50729	1.92966	4.32478	0.106382	NA	1.34588	1.02146	0.598328	0.114532	0.591743	23.2405	1.39452	3.62276	0.406774	2.48087	21.1745	1	0.960102	Oscillibacter sp. CAG:155_msp_0391	Oscillibacter	Oscillospiraceae	Clostridiales	Clostridia	Firmicutes	Bacteria
msp_0392	-9.38763e-05	0.000373481	0.80154	21	7.9005e-07	6.94704e-07	0.109472	43.1211	1.75812	1.91199	5.67697	NA	3.70004	14.4128	7.91322	3.97109	NA	10.7805	6.65819	1.95085	0.499345	NA	1.94289	0.979908	0.950896	0.27281	3.089	15.0332	1.73183	1.11239	0.271586	3.46845	13.672	1	0.963528	Firmicutes bacterium CAG:238_msp_0392	unclassified Firmicutes	unclassified Firmicutes	unclassified Firmicutes	unclassified Firmicutes	Firmicutes	Bacteria
msp_0393	-0.00158899	0.00105266	0.131173	11	5.66714e-06	4.74766e-06	0.030599	89.4838	9.50913	7.73072	NA	NA	NA	NA	NA	17.6677	NA	NA	NA	6.49952	1.09103	NA	6.82061	2.29635	6.93961	NA	19.0396	19.4638	NA	3.76508	NA	8.68596	NA	1	0.568938	unclassified Ruminiclostridium_msp_0393	Ruminiclostridium	Ruminococcaceae	Clostridiales	Clostridia	Firmicutes	Bacteria
msp_0394	0.000250084	0.000192232	0.193276	10	0	1.32187e-07	0.484577	0	1	NA	32.1706	2.77645	NA	9.41814	NA	35.9162	NA	NA	NA	1.8217	0.196019	NA	3.58627	2.19019	9.98626	NA	NA	NA	NA	NA	NA	1.93817	NA	1	0.660606	unclassified Parabacteroides_msp_0394	Parabacteroides	Porphyromonadaceae	Bacteroidales	Bacteroidia	Bacteroidetes	Bacteria
msp_0395	-0.000301401	0.000636381	0.635773	10	1.64122e-06	1.65122e-06	0.0769922	68.4141	3.16597	22.2156	NA	NA	NA	NA	23.8304	NA	NA	10.8	NA	3.6715	NA	NA	10.2547	3.00101	14.0815	NA	NA	2.67072	NA	6.07097	NA	3.40371	NA	1	0.926509	Brachyspira sp. CAG:700_msp_0395	Brachyspira	Brachyspiraceae	Brachyspirales	Spirochaetia	Spirochaetes	Bacteria
msp_0396	-0.00186122	0.00157755	0.238075	22	3.68959e-05	1.63306e-05	3.06075e-08	77.1858	4.38323	4.87615	5.1926	5.23422	4.06438	5.52247	6.15254	5.29662	NA	5.99541	4.8384	5.89699	2.47314	NA	5.11414	3.40033	3.96797	1.60981	4.66545	6.26234	2.49267	4.92317	2.40024	4.71453	4.90641	1	0.700934	Adlercreutzia equolifaciens_msp_0396	Adlercreutzia	Eggerthellaceae	Eggerthellales	Coriobacteriia	Actinobacteria	Bacteria
msp_0397	-0.000489471	0.000380428	0.198223	21	1.23919e-06	8.08657e-07	0.0194348	63.8263	2.76444	5.92657	9.41422	NA	2.91823	10.4743	10.6647	6.76356	NA	9.90321	2.28544	4.06754	0.908971	NA	4.04889	2.36124	2.6793	1.06798	4.26634	10.032	1.04121	4.25024	0.528076	2.37196	4.02609	1	0.669088	unclassified Clostridiales_msp_0397	unclassified Clostridiales	unclassified Clostridiales	Clostridiales	Clostridia	Firmicutes	Bacteria
msp_0398	0.00066179	0.00195644	0.735166	22	4.34112e-05	2.36236e-05	0.00185829	68.5354	3.17817	4.64865	3.66772	6.89021	2.63207	7.11566	8.06572	4.60817	NA	6.95838	6.79332	5.88764	2.20995	NA	4.12533	2.66689	3.03412	0.460656	3.35239	8.04161	2.98146	3.9368	0.722196	3.71616	7.48491	1	0.94857	unclassified_msp_0398	unclassified	unclassified	unclassified	unclassified	unclassified	unclassified
msp_0399	-0.000478134	0.000530365	0.367313	21	1.52182e-06	1.22108e-06	0.382193	49.5048	1.98039	0.714143	8.53561	14.2071	NA	12.3353	11.1349	3.07254	NA	15.6724	16.6042	1.31191	0.0743276	NA	0.581511	0.173692	0.178781	0.0311723	0.568283	12.8893	0.157069	0.343615	0.211769	0.658711	0.543789	1	0.781539	Faecalibacterium prausnitzii 5_msp_0399	Faecalibacterium	Ruminococcaceae	Clostridiales	Clostridia	Firmicutes	Bacteria
msp_0400	0.000463585	0.000504663	0.358303	10	8.7835e-07	1.01298e-06	0.158622	50.1275	2.00511	8.85157	NA	NA	NA	24.4036	NA	NA	NA	24.3855	NA	15.649	NA	NA	7.86245	NA	1.46382	NA	NA	6.00031	NA	4.76395	NA	6.2979	0.321869	1	0.781434	unclassified Firmicutes_msp_0400	unclassified Firmicutes	unclassified Firmicutes	unclassified Firmicutes	unclassified Firmicutes	Firmicutes	Bacteria
msp_0401	-9.47902e-06	0.000167671	0.954917	21	1.4086e-07	1.3327e-07	0.380519	44.5867	1.80462	3.74775	5.57268	NA	1.3374	18.7093	16.9845	5.74548	NA	10.2969	12.2303	2.21184	0.161629	NA	3.38386	0.834289	0.554578	0.108347	1.96098	8.26217	0.617623	1.80585	0.192554	1.93764	3.34433	1	0.98737	unclassified_msp_0401	unclassified	unclassified	unclassified	unclassified	unclassified	unclassified
msp_0402	2.14468e-05	0.000342803	0.950114	20	5.91442e-07	5.98198e-07	0.114191	34.3364	1.52291	2.25776	1.85034	1.62465	1.35201	8.49698	15.678	NA	NA	14.9884	9.97117	6.96618	2.5742	NA	6.15714	4.78951	2.20342	0.385931	5.64408	9.04446	NA	2.71031	0.983221	1.08417	1.23809	1	0.985644	unclassified Lachnospiraceae_msp_0402	unclassified Lachnospiraceae	Lachnospiraceae	Clostridiales	Clostridia	Firmicutes	Bacteria
msp_0403	0.000177562	0.000248104	0.474191	20	9.18748e-08	2.48439e-07	0.1085	7.94135	1.08626	0.257505	1.21609	0.24395	NA	4.35845	6.31354	0.51203	NA	3.72371	NA	24.2034	0.767149	NA	0.431201	1.84398	1.56433	0.267877	0.506216	4.11702	2.06473	0.666352	3.01251	31.4077	12.5223	1	0.852413	Enterococcus faecium_msp_0403	Enterococcus	Enterococcaceae	Lactobacillales	Bacilli	Firmicutes	Bacteria
msp_0404	-0.000493451	0.00122997	0.68828	22	1.28459e-05	8.64896e-06	0.00864242	56.2605	2.28626	4.28796	7.92095	10.3755	2.86191	8.48916	10.1004	5.10709	NA	8.68995	2.3736	5.45846	1.13957	NA	3.25354	1.32638	1.94871	0.315087	3.5044	9.77775	1.94246	2.56441	0.573722	3.79907	4.18992	1	0.930503	unclassified Firmicutes_msp_0404	unclassified Firmicutes	unclassified Firmicutes	unclassified Firmicutes	unclassified Firmicutes	Firmicutes	Bacteria
msp_0405	0.000237318	0.000248635	0.339837	21	0	2.7201e-07	0.456264	0	1	1.16968	1.25679	3.78926	0.475473	10.4924	8.09797	1.07987	NA	8.91796	1.21616	1.57829	0.174097	NA	0.45108	0.426669	0.74147	NA	2.5115	44.6542	4.7046	0.69049	0.690717	3.15736	3.72391	1	0.776783	Ruminococcus sp. CAG:403_msp_0405	Ruminococcus	Ruminococcaceae	Clostridiales	Clostridia	Firmicutes	Bacteria
msp_0406	-0.00062541	0.000347536	0.0719304	12	6.48384e-07	5.16658e-07	0.163792	69.3186	3.2593	NA	0.968306	2.0907	0.814363	3.22713	7.69766	7.35151	NA	1.65992	NA	17.5783	NA	NA	NA	NA	NA	NA	NA	15.1569	NA	16.1102	NA	14.3487	12.9963	1	0.449806	unclassified Megasphaera_msp_0406	Megasphaera	Veillonellaceae	Veillonellales	Negativicutes	Firmicutes	Bacteria
msp_0407	-0.00113017	0.000538862	0.0359644	22	0	1.26033e-06	0.625428	0	1	0.839774	6.69466	4.47321	6.24289	6.60222	19.0677	1.77414	NA	7.17619	1.55053	2.3378	1.05285	NA	2.2173	0.73541	0.501659	0.0626568	0.764553	32.3616	0.853342	0.823526	0.325884	1.39114	2.151	1	0.34497	unclassified Gemmiger_msp_0407	Gemmiger	Ruminococcaceae	Clostridiales	Clostridia	Firmicutes	Bacteria
msp_0408	0.00140681	0.000999686	0.159352	22	1.53736e-05	6.48479e-06	4.99746e-05	89.4637	9.49104	2.0471	2.6378	1.04106	6.00711	3.95324	2.82199	4.60206	NA	4.4183	3.90774	6.26407	3.15027	NA	4.10316	5.30634	6.20465	5.00246	6.00125	6.17453	4.93159	5.76704	3.56289	5.6578	6.43756	1	0.61749	Lactobacillus mucosae_msp_0408	Lactobacillus	Lactobacillaceae	Lactobacillales	Bacilli	Firmicutes	Bacteria
msp_0409	0.000497658	0.000388459	0.200156	17	1.04832e-06	7.51505e-07	0.38975	79.3122	4.83376	13.7769	3.78765	0.42207	5.14155	3.65476	4.40092	3.48947	NA	5.26888	3.02843	14.227	NA	NA	6.91808	2.35577	12.8475	0.483666	0.506437	10.5914	NA	NA	NA	9.09962	NA	1	0.670237	Pyramidobacter piscolens_msp_0409	Pyramidobacter	Synergistaceae	Synergistales	Synergistia	Synergistetes	Bacteria
msp_0410	0.000375176	0.000190422	0.0488118	18	8.27595e-08	1.4788e-07	0.7818	15.9755	1.19013	5.14499	1.65998	NA	0.78807	9.05232	37.0027	NA	NA	17.773	NA	2.76794	1.05195	NA	1.98614	0.943307	0.597658	0.208896	5.93819	11.7029	NA	0.723399	0.295081	0.419092	1.94441	1	0.380117	unclassified Anaeromassilibacillus_msp_0410	Anaeromassilibacillus	Ruminococcaceae	Clostridiales	Clostridia	Firmicutes	Bacteria
msp_0411	7.39494e-05	0.000359466	0.837009	11	1.35574e-07	4.87259e-07	0.732391	7.60805	1.08235	0.64006	NA	NA	NA	NA	NA	NA	NA	NA	NA	10.2068	NA	NA	21.9222	2.24051	1.51014	0.131474	NA	61.624	NA	0.782885	0.535055	0.356978	0.0499131	1	0.969276	unclassified Akkermansia_msp_0411	Akkermansia	Akkermansiaceae	Verrucomicrobiales	Verrucomicrobiae	Verrucomicrobia	Bacteria
msp_0412	-0.000143507	0.000119864	0.231207	19	0	5.1278e-08	0.362763	0	1	0.54704	NA	1.13262	NA	52.9816	11.3813	0.992283	NA	24.2237	7.54499	0.198786	0.00534009	NA	0.11728	0.0356173	0.0396216	0.0117551	0.0449888	0.287704	0.0450386	0.111399	NA	0.0835903	0.21528	1	0.700934	Bacteroides sp. CAG:144_msp_0412	Bacteroides	Bacteroidaceae	Bacteroidales	Bacteroidia	Bacteroidetes	Bacteria
msp_0413	0.000139998	0.000452521	0.757038	16	1.60749e-06	9.68916e-07	0.317557	90.3372	10.3489	9.98907	3.86598	0.57948	0.305301	1.01183	9.54419	12.5745	NA	2.2318	NA	12.1664	NA	NA	NA	NA	6.82591	0.380598	3.67087	12.5153	0.57913	12.0613	NA	11.6983	NA	1	0.955598	unclassified Phascolarctobacterium_msp_0413	Phascolarctobacterium	Acidaminococcaceae	Acidaminococcales	Negativicutes	Firmicutes	Bacteria
msp_0414	-0.00037877	0.000220682	0.0860953	20	0	1.81004e-07	0.35747	0	1	1.1629	NA	16.4382	0.417156	28.626	1.38602	3.8081	NA	24.0687	2.83829	1.02304	NA	NA	0.376502	0.14159	0.15545	0.0226752	0.537996	17.1161	0.23338	0.284877	0.112345	0.425629	0.825029	1	0.483797	Duodenibacillus massiliensis_msp_0414	Duodenibacillus	Sutterellaceae	Burkholderiales	Betaproteobacteria	Proteobacteria	Bacteria
msp_0415	0.00095192	0.000614467	0.121339	3	0	1.6197e-06	0.825077	0	1	NA	NA	NA	NA	NA	NA	NA	NA	NA	NA	NA	NA	NA	NA	NA	NA	NA	NA	NA	NA	16.9703	NA	9.99345	73.0362	1	0.555573	unclassified Bacteroidales_msp_0415	unclassified Bacteroidales	unclassified Bacteroidales	Bacteroidales	Bacteroidia	Bacteroidetes	Bacteria
msp_0416	-0.000157926	0.000174142	0.364471	15	0	9.4876e-08	0.571459	0	1	1.15353	NA	NA	NA	44.5739	NA	NA	NA	43.6429	2.85196	0.663358	NA	NA	0.466658	0.0736495	0.0531557	0.0451998	0.438351	5.64134	0.0645623	0.189843	NA	0.0577168	0.0839015	1	0.781434	Bacteroides sp. CAG:709_msp_0416	Bacteroides	Bacteroidaceae	Bacteroidales	Bacteroidia	Bacteroidetes	Bacteria
msp_0417	-0.000149578	0.00048888	0.759635	12	6.04451e-08	9.66455e-07	0.300656	1.45277	1.01474	0.966834	NA	NA	NA	NA	NA	NA	NA	NA	NA	1.98967	3.20252	NA	1.2183	0.418733	0.124465	15.421	1.70385	59.0334	NA	13.1562	NA	2.17146	0.593537	1	0.957044	unclassified Alistipes_msp_0417	Alistipes	Rikenellaceae	Bacteroidales	Bacteroidia	Bacteroidetes	Bacteria
msp_0418	-0.000964446	0.00150196	0.520793	22	2.14322e-05	1.43105e-05	0.00906215	48.5957	1.94536	4.94353	4.60458	5.84087	2.59284	6.01724	7.32965	5.60102	NA	5.75849	5.62179	5.81825	2.99531	NA	5.11475	3.02325	2.82315	0.930102	4.81744	8.06806	1.75335	3.61082	2.00139	3.77518	6.95893	1	0.889367	unclassified Gemmiger_msp_0418	Gemmiger	Ruminococcaceae	Clostridiales	Clostridia	Firmicutes	Bacteria
msp_0419	-0.00180518	0.00109045	0.0978346	22	2.32871e-06	5.85884e-06	0.194969	9.46028	1.10449	1.46015	3.76237	1.87441	1.33056	5.91979	22.7948	3.81668	NA	9.4061	1.16478	12.6158	0.559371	NA	2.99076	2.02577	1.77684	0.310085	2.05889	10.778	1.09112	1.82287	1.02617	5.16976	6.24495	1	0.517424	Bifidobacterium bifidum_msp_0419	Bifidobacterium	Bifidobacteriaceae	Bifidobacteriales	Actinobacteria	Actinobacteria	Bacteria
msp_0420	-0.000150985	0.000780307	0.846572	7	2.57313e-06	2.37141e-06	0.0173149	69.0244	3.22835	NA	NA	NA	14.1781	NA	14.1324	NA	NA	20.6028	18.2157	NA	NA	NA	18.5546	9.42603	NA	NA	NA	NA	NA	NA	NA	4.89045	NA	1	0.969612	unclassified Clostridiales_msp_0420	unclassified Clostridiales	unclassified Clostridiales	Clostridiales	Clostridia	Firmicutes	Bacteria
msp_0421	0.000165308	0.000111724	0.138976	15	0	4.78357e-08	0.748235	0	1	2.70586	17.5208	NA	NA	NA	NA	NA	NA	44.6326	NA	2.99318	NA	0.0602377	10.7183	0.361906	NA	0.21092	0.975898	13.8905	0.819549	0.369009	0.984246	2.33462	1.42233	1	0.587382	unclassified_msp_0421	unclassified	unclassified	unclassified	unclassified	unclassified	unclassified
msp_0422	-0.00320635	0.00153692	0.036959	23	2.89062e-05	1.53396e-05	0.000345299	60.9812	2.56286	4.78971	4.18705	3.33871	0.89387	5.35331	5.46141	5.10573	NA	5.83019	6.32256	6.36269	3.35709	1.48203	5.59006	4.16195	4.32927	1.51398	5.59989	6.52765	1.87676	5.05636	1.786	4.85135	6.22239	1	0.345564	Romboutsia timonensis_msp_0422	Romboutsia	Peptostreptococcaceae	Clostridiales	Clostridia	Firmicutes	Bacteria
msp_0423	0.000152711	0.00019538	0.434442	21	1.61483e-07	1.95159e-07	0.0844397	24.0633	1.31689	6.3623	3.75833	NA	10.2702	7.58536	13.938	10.114	NA	10.0426	7.93864	2.01025	0.199871	NA	1.24058	1.31297	0.313152	0.126398	1.9968	12.0929	4.64296	0.41639	1.201	2.88442	1.55286	1	0.825482	unclassified Oscillibacter_msp_0423	Oscillibacter	Oscillospiraceae	Clostridiales	Clostridia	Firmicutes	Bacteria
msp_0424	-0.000104779	0.000263755	0.691175	22	4.00314e-07	3.63499e-07	0.0372491	36.8213	1.58281	2.61524	3.36162	9.36464	2.70648	6.16652	14.0825	3.77949	NA	11.7364	8.96527	2.03047	1.2232	NA	2.96236	1.18091	1.09564	0.322238	1.84643	12.2657	0.930913	1.633	0.418203	2.53501	8.77776	1	0.930503	unclassified Clostridiales_msp_0424	unclassified Clostridiales	unclassified Clostridiales	Clostridiales	Clostridia	Firmicutes	Bacteria
msp_0425	0.000373566	0.00058411	0.522467	22	1.90207e-06	1.96316e-06	0.055769	29.4573	1.41758	4.09343	2.67235	4.96086	2.15308	6.06718	10.6098	6.90388	NA	8.41056	11.6271	7.79235	1.25266	0.125034	4.42005	2.21471	1.84912	0.300049	3.18851	7.50406	1.27459	4.30978	NA	3.87047	4.40034	1	0.889367	unclassified Firmicutes_msp_0425	unclassified Firmicutes	unclassified Firmicutes	unclassified Firmicutes	unclassified Firmicutes	Firmicutes	Bacteria
msp_0426	-0.000821866	0.000582521	0.158281	21	1.29864e-06	1.49199e-06	0.0362372	31.257	1.45469	0.590448	1.41875	6.71175	NA	6.24622	23.8896	1.97628	NA	13.5451	4.88201	1.68363	0.264293	NA	1.17372	0.372571	0.355663	0.0470321	1.13397	4.78392	0.240027	2.69012	0.136901	8.88448	18.9735	1	0.61749	Dialister sp. CAG:486_msp_0426	Dialister	Veillonellaceae	Veillonellales	Negativicutes	Firmicutes	Bacteria
msp_0427	-0.000186586	0.00018899	0.323505	8	0	1.35545e-07	0.275294	0	1	NA	NA	NA	0.818894	NA	NA	NA	NA	NA	NA	1.51309	NA	NA	2.83376	NA	6.76092	NA	NA	NA	NA	22.9316	0.117848	3.08396	61.9399	1	0.760872	Eubacterium sp. CAG:786_msp_0427	Eubacterium	Eubacteriaceae	Clostridiales	Clostridia	Firmicutes	Bacteria
msp_0428	-0.00194586	0.00117635	0.0980983	3	1.59133e-07	4.8258e-06	0.371856	2.57271	1.02641	69.2811	NA	NA	NA	NA	NA	NA	NA	NA	NA	NA	NA	NA	NA	2.43645	NA	NA	NA	NA	NA	28.2825	NA	NA	NA	1	0.517436	Bacteroidales bacterium H5_msp_0428	unclassified Muribaculaceae	Muribaculaceae	Bacteroidales	Bacteroidia	Bacteroidetes	Bacteria
msp_0429	-0.000216211	0.000169449	0.201969	22	1.44884e-08	1.34791e-07	0.446987	2.13571	1.02182	5.05112	3.23309	1.6323	1.77262	7.27965	31.8371	3.28897	NA	5.65207	4.23073	4.23332	0.123393	NA	2.48234	0.737362	3.09496	0.164696	1.29244	13.4652	5.28753	2.16266	0.655119	0.855027	1.46826	1	0.670293	Alistipes timonensis_msp_0429	Alistipes	Rikenellaceae	Bacteroidales	Bacteroidia	Bacteroidetes	Bacteria
msp_0430	-0.000343087	0.000355017	0.333845	23	1.14288e-06	6.82027e-07	0.014894	73.3561	3.75321	5.26791	9.77719	9.42936	3.46538	10.7608	10.0148	6.61703	NA	9.84661	8.04387	2.94509	0.385023	0.44831	3.00632	0.954925	0.786081	0.230996	2.18786	8.62884	0.666814	3.07992	0.40364	1.16069	1.89252	1	0.769634	unclassified_msp_0430	unclassified	unclassified	unclassified	unclassified	unclassified	unclassified
msp_0431	-0.00123555	0.000754307	0.101422	22	1.11985e-06	3.26937e-06	0.287841	9.15815	1.10081	2.17642	4.48507	1.87392	1.97011	4.09563	6.95408	2.80091	NA	6.49375	7.45805	5.75995	0.935726	NA	5.45429	4.71346	1.47695	0.490817	2.62874	15.3309	6.67911	4.48943	0.819853	5.35262	7.5602	1	0.517683	Eubacterium sp. CAG:274_msp_0431	Eubacterium	Eubacteriaceae	Clostridiales	Clostridia	Firmicutes	Bacteria
msp_0432	-4.80597e-05	0.000168343	0.775271	22	4.32465e-08	1.19639e-07	0.201917	7.34143	1.07923	3.07574	5.24575	26.0734	1.03174	7.50121	8.46949	3.2889	NA	20.3529	1.68706	1.64639	0.0972132	NA	1.27755	0.319004	0.305053	0.0593393	1.0276	15.0799	0.228379	1.76682	0.230121	0.472793	0.763705	1	0.960102	unclassified_msp_0432	unclassified	unclassified	unclassified	unclassified	unclassified	unclassified
msp_0433	-0.00172752	0.0005698	0.00243098	20	3.40217e-06	1.95145e-06	0.0227991	69.719	3.3024	6.81126	6.84661	4.00108	1.62994	6.7726	4.86136	6.46599	NA	6.45981	3.84287	6.18718	1.85168	NA	4.7183	NA	4.05007	1.08145	6.05489	9.37269	3.20466	7.62048	6.17188	1.99521	NA	1	0.0728559	unclassified Firmicutes_msp_0433	unclassified Firmicutes	unclassified Firmicutes	unclassified Firmicutes	unclassified Firmicutes	Firmicutes	Bacteria
msp_0434	-0.000769711	0.000417796	0.0654294	6	2.79563e-08	6.35434e-07	0.286832	2.20077	1.0225	19.4168	NA	NA	NA	NA	NA	NA	NA	NA	NA	10.2455	NA	NA	13.6721	NA	NA	NA	NA	NA	NA	5.79163	0.626957	50.2469	NA	1	0.437735	unclassified Clostridiales_msp_0434	unclassified Clostridiales	unclassified Clostridiales	Clostridiales	Clostridia	Firmicutes	Bacteria
msp_0435	0.000379057	0.000305463	0.214633	22	5.98262e-07	4.58155e-07	0.0421647	74.981	3.99696	3.65661	3.49532	9.42914	3.20417	14.4097	15.2851	15.104	NA	10.831	NA	2.92365	0.362038	0.330526	3.65069	0.709842	0.629451	0.119944	1.06318	5.21149	1.77239	1.43642	1.70127	3.11983	1.55429	1	0.688077	unclassified Oscillibacter_msp_0435	Oscillibacter	Oscillospiraceae	Clostridiales	Clostridia	Firmicutes	Bacteria
msp_0436	-0.000502753	0.00246427	0.83834	23	8.5059e-05	4.01752e-05	1.12262e-06	69.8705	3.319	4.5033	4.43261	4.881	3.60631	5.20407	6.0277	5.07772	NA	6.01308	4.66377	6.09426	1.67586	1.36557	5.14854	3.5003	4.39155	1.28325	4.7249	6.34979	2.72162	5.0085	2.99652	5.07231	5.25746	1	0.969276	Blautia obeum_msp_0436	Blautia	Lachnospiraceae	Clostridiales	Clostridia	Firmicutes	Bacteria
msp_0437c	0.000638674	0.000228301	0.00514986	19	4.44931e-07	2.90005e-07	0.000770781	62.132	2.64075	1.98907	7.28538	4.70632	NA	5.08283	7.74714	8.30547	NA	10.7438	8.40546	NA	NA	NA	3.6782	2.12761	6.7692	2.37573	2.38327	7.90524	0.853453	2.18639	0.857114	6.15074	10.4476	1	0.106109	Actinomyces oris_msp_0437c	Actinomyces	Actinomycetaceae	Actinomycetales	Actinobacteria	Actinobacteria	Bacteria
msp_0438	-2.36643e-05	0.000108042	0.826628	15	1.31824e-08	4.4243e-08	0.853697	6.75092	1.0724	4.13169	NA	0.511442	NA	23.4859	4.52006	2.33935	NA	0.972951	0.786694	0.445534	0.616944	NA	0.465078	NA	0.919361	NA	NA	53.4812	NA	6.09105	NA	0.272012	0.960736	1	0.967778	unclassified Bacteroides_msp_0438	Bacteroides	Bacteroidaceae	Bacteroidales	Bacteroidia	Bacteroidetes	Bacteria
msp_0439	-0.000282972	0.000532829	0.595367	21	2.85426e-06	1.75128e-06	0.00643585	54.8569	2.21518	6.09958	5.23777	5.12442	4.69879	4.86258	7.23175	5.87106	NA	6.78691	4.10218	7.20262	0.773117	NA	6.04432	1.59013	1.72124	NA	6.20845	7.76656	4.6146	6.51059	2.43954	2.40689	2.7069	1	0.909371	unclassified Alistipes_msp_0439	Alistipes	Rikenellaceae	Bacteroidales	Bacteroidia	Bacteroidetes	Bacteria
msp_0440	-1.7111e-05	6.3418e-05	0.787303	19	0	1.37005e-08	0.369382	0	1	0.103811	NA	NA	NA	21.2199	NA	27.9673	NA	32.7088	3.92189	0.190207	0.0136684	0.019409	0.0842353	0.0379534	0.0401382	0.00750473	0.0911169	12.6887	0.0177071	0.0690391	0.0150992	0.0637266	0.739815	1	0.960102	unclassified Eubacterium_msp_0440	Eubacterium	Eubacteriaceae	Clostridiales	Clostridia	Firmicutes	Bacteria
msp_0441	-0.000154274	0.0010478	0.882945	18	1.31274e-05	6.3857e-06	0.00169662	89.2034	9.26222	7.39974	4.32578	4.25285	1.2153	3.42623	5.43223	5.5903	NA	6.11933	2.98601	8.08971	1.99713	NA	4.38757	6.6782	NA	NA	8.20161	8.06185	NA	7.53437	NA	6.2226	8.0792	1	0.977649	unclassified Roseburia_msp_0441	Roseburia	Lachnospiraceae	Clostridiales	Clostridia	Firmicutes	Bacteria
msp_0442	0.00048907	0.000626802	0.435237	22	5.12466e-06	2.47881e-06	4.77246e-05	77.5744	4.45919	5.28607	5.04193	7.2629	5.15434	6.17386	7.17544	6.34507	NA	6.91051	5.88518	5.62225	2.96418	NA	4.51464	2.70639	2.89662	0.735545	3.74246	7.08331	4.07139	3.19742	0.529356	2.93393	3.76722	1	0.825744	unclassified Flavonifractor_msp_0442	Flavonifractor	unclassified Clostridiales	Clostridiales	Clostridia	Firmicutes	Bacteria
msp_0443	0.000202958	0.000121303	0.0942994	10	7.04109e-09	6.00133e-08	0.462349	4.55769	1.04775	9.84646	19.8321	5.2234	NA	4.86092	9.61226	NA	NA	28.9733	3.76315	NA	1.66262	NA	NA	NA	NA	NA	NA	4.27551	NA	NA	NA	11.9503	NA	1	0.505486	unclassified Parabacteroides_msp_0443	Parabacteroides	Porphyromonadaceae	Bacteroidales	Bacteroidia	Bacteroidetes	Bacteria
msp_0444	-0.000266631	0.000175369	0.128411	19	0	1.07777e-07	0.296051	0	1	1.40452	1.57898	NA	0.156522	3.31983	4.42638	0.340933	NA	2.32028	0.28443	1.77935	NA	NA	0.875851	0.295271	1.50569	NA	0.948215	34.6304	0.684159	1.08034	0.0262019	1.67637	42.6663	1	0.568938	unclassified Eubacterium_msp_0444	Eubacterium	Eubacteriaceae	Clostridiales	Clostridia	Firmicutes	Bacteria
msp_0445	-0.000392496	0.000264276	0.137498	12	1.13999e-07	2.84011e-07	0.224882	13.6052	1.15748	7.07263	NA	NA	NA	NA	NA	48.8431	NA	NA	NA	4.60712	NA	NA	1.2608	2.69337	0.742221	5.15376	11.3747	NA	NA	1.32755	0.213474	2.30704	14.4042	1	0.584884	unclassified Clostridiales_msp_0445	unclassified Clostridiales	unclassified Clostridiales	Clostridiales	Clostridia	Firmicutes	Bacteria
msp_0446c	0.000244397	0.000119055	0.0400913	19	1.05472e-07	7.87468e-08	0.0204034	51.079	2.04411	2.39454	3.04178	1.76687	7.99459	3.56673	7.65698	8.94487	NA	8.94004	NA	11.1133	1.79725	NA	6.20834	2.41493	5.67857	0.841258	4.30561	3.85969	NA	5.79526	NA	2.34553	11.3338	1	0.35721	Oribacterium sinus_msp_0446c	Oribacterium	Lachnospiraceae	Clostridiales	Clostridia	Firmicutes	Bacteria
msp_0447	-0.000154333	0.000150891	0.306395	20	1.22712e-09	8.78064e-08	0.308892	0.230417	1.00231	3.15727	29.6601	NA	1.23048	7.65226	16.7575	5.41145	NA	4.31595	1.49654	1.0045	NA	NA	0.620961	0.163361	0.240345	0.0726817	0.815511	25.4528	0.126862	0.403747	0.0825979	0.608102	0.727046	1	0.744532	Firmicutes bacterium CAG:272_msp_0447	unclassified Firmicutes	unclassified Firmicutes	unclassified Firmicutes	unclassified Firmicutes	Firmicutes	Bacteria
msp_0448	-0.00031079	0.000254429	0.221891	23	4.57471e-07	3.7062e-07	0.0264112	43.2829	1.76314	5.68795	3.79565	5.98699	3.49568	4.79872	8.68428	4.20377	NA	8.64211	12.7728	6.39397	1.65204	0.0634516	4.71591	2.40896	1.62741	0.302134	4.5288	10.5852	0.976238	1.86888	0.83313	2.17685	3.79912	1	0.693351	unclassified Firmicutes_msp_0448	unclassified Firmicutes	unclassified Firmicutes	unclassified Firmicutes	unclassified Firmicutes	Firmicutes	Bacteria
msp_0449	-0.000516569	0.000389897	0.185209	22	1.69291e-06	9.18372e-07	0.000228791	72.3109	3.61152	7.54045	6.37019	8.68829	2.93697	7.47633	7.45723	5.57366	NA	7.46798	4.38493	4.77818	1.88876	NA	4.37241	2.00013	1.87314	0.597928	2.93423	7.86158	1.76113	6.412	0.639863	3.21703	3.7676	1	0.650535	unclassified_msp_0449	unclassified	unclassified	unclassified	unclassified	unclassified	unclassified
msp_0450	-0.00108378	0.000460553	0.0186119	22	1.78176e-06	1.24339e-06	0.00953972	49.429	1.97742	3.81731	2.04273	3.06387	4.50221	7.99972	8.84565	6.66961	NA	8.31313	9.12318	5.86932	2.86306	NA	3.19552	1.32156	2.169	0.634662	2.66094	8.90448	2.13777	3.36581	0.84756	2.72501	8.92789	1	0.23009	unclassified Clostridiaceae_msp_0450	unclassified Clostridiaceae	Clostridiaceae	Clostridiales	Clostridia	Firmicutes	Bacteria
msp_0451	-0.000289988	0.000236596	0.220325	20	3.10897e-07	2.91364e-07	0.416002	36.8001	1.58228	2.62099	7.11865	NA	2.88962	7.29975	9.16808	2.58821	NA	10.4826	10.0736	2.35409	NA	NA	1.55641	0.773565	1.29095	3.97956	1.42756	14.4198	5.9237	0.840971	1.93159	1.23167	12.0287	1	0.693351	unclassified Ruminococcus_msp_0451	Ruminococcus	Ruminococcaceae	Clostridiales	Clostridia	Firmicutes	Bacteria
msp_0452	0.000949922	0.00119864	0.428069	23	1.2724e-05	8.77946e-06	0.00546852	48.6045	1.94569	5.35535	5.25738	5.8863	2.8433	7.32813	9.06743	5.17417	NA	7.49656	5.61997	6.18519	1.25253	0.696593	4.20964	2.25033	2.50652	0.509843	4.62603	9.51521	1.9545	3.50435	0.793157	3.79283	4.17469	1	0.821261	unclassified Clostridiales_msp_0452	unclassified Clostridiales	unclassified Clostridiales	Clostridiales	Clostridia	Firmicutes	Bacteria
msp_0453	8.80998e-05	0.000322172	0.784503	20	6.60088e-07	5.14223e-07	0.268683	45.9712	1.85086	5.22227	10.6742	8.79791	NA	9.81732	12.1197	NA	NA	10.5896	4.64398	2.69471	3.87508	NA	0.470199	0.219385	0.234983	0.0596477	12.0536	11.3426	0.0947038	0.664636	0.890427	0.411801	5.12325	1	0.960102	unclassified Firmicutes_msp_0453	unclassified Firmicutes	unclassified Firmicutes	unclassified Firmicutes	unclassified Firmicutes	Firmicutes	Bacteria
msp_0454	-0.00289399	0.000737002	8.61167e-05	23	3.10758e-06	3.17734e-06	0.0702451	29.4846	1.41813	2.74692	3.81921	1.85653	2.51723	4.15505	6.95599	4.18613	NA	6.02397	12.8124	8.48073	0.691588	0.281792	5.0187	5.1789	2.89676	0.946563	3.51202	8.93374	0.966786	2.91223	1.66484	5.29104	8.15084	0.170339	0.00853073	unclassified Clostridium_msp_0454	Clostridium	Clostridiaceae	Clostridiales	Clostridia	Firmicutes	Bacteria
msp_0455	2.95806e-05	0.0001019	0.771593	21	0	4.00066e-08	0.0334978	0	1	0.240665	16.4263	13.7127	0.359572	NA	9.18471	2.07264	NA	49.7129	0.226008	0.31434	0.0138018	NA	0.489406	0.118613	0.110881	0.0367379	2.52966	3.66212	0.0963702	0.238276	0.0846412	0.18793	0.181638	1	0.960102	Candidatus Gastranaerophilales bacterium HUM_21 _msp_0455	Candidatus Gastranaerophilales	Candidatus Gastranaerophilales	Candidatus Gastranaerophilales	Candidatus Melainabacteria	Candidatus Melainabacteria	Bacteria
msp_0456	-0.00197931	0.00175521	0.259457	22	3.7206e-05	1.99398e-05	0.000244319	61.9766	2.62996	5.05908	5.06261	4.70549	3.71794	5.60035	6.49577	4.94619	NA	6.67782	4.70556	5.88968	1.23578	NA	5.01361	3.63013	4.22196	1.00112	4.69545	7.045	2.7597	4.07558	2.96775	4.51054	5.98288	1	0.713777	unclassified Gemmiger_msp_0456	Gemmiger	Ruminococcaceae	Clostridiales	Clostridia	Firmicutes	Bacteria
msp_0457	-0.00594161	0.001363	1.30525e-05	23	1.44205e-05	1.10682e-05	0.00812731	41.6786	1.71464	4.4797	6.54171	6.7693	2.68187	8.92897	7.92686	4.97892	NA	8.11919	4.32063	6.80749	0.500542	0.0651312	5.1261	2.20694	2.59056	0.584642	3.72462	10.0845	1.17017	3.42774	1.17715	3.57506	4.21218	0.0258178	0.00286865	Faecalibacterium sp. CAG:82_msp_0457	Faecalibacterium	Ruminococcaceae	Clostridiales	Clostridia	Firmicutes	Bacteria
msp_0458	-9.06567e-05	0.000237472	0.702641	21	1.33549e-07	2.30734e-07	0.236323	14.0194	1.16305	0.489981	3.32126	8.56959	1.04552	3.88312	23.4857	8.60356	NA	23.5473	16.6456	1.80453	0.0904708	NA	0.655146	0.168465	0.0784812	0.0408298	0.605965	4.61817	NA	0.919988	0.199564	0.362859	0.863902	1	0.935908	Catenibacterium mitsuokai_msp_0458	Catenibacterium	Erysipelotrichaceae	Erysipelotrichales	Erysipelotrichia	Firmicutes	Bacteria
msp_0459	2.90884e-05	8.38535e-05	0.728669	11	4.8811e-09	3.26759e-08	0.275652	3.39572	1.03515	0.675701	NA	NA	NA	NA	NA	16.6785	NA	4.74746	NA	0.49533	NA	NA	0.645776	0.412807	0.104045	NA	NA	73.6974	NA	1.16771	NA	0.156155	1.21917	1	0.947338	unclassified Roseburia_msp_0459	Roseburia	Lachnospiraceae	Clostridiales	Clostridia	Firmicutes	Bacteria
msp_0460	-2.32303e-05	0.000281497	0.93423	20	6.71685e-08	4.16643e-07	0.398776	4.20907	1.04394	5.06406	0.660217	0.544734	1.34089	1.49794	2.42059	9.31848	NA	1.85102	1.83193	13.1339	NA	NA	8.94264	9.40947	5.1012	3.70336	13.0467	6.92874	NA	6.51676	0.789461	1.17432	6.72364	1	0.98206	unclassified Bacteroides_msp_0460	Bacteroides	Bacteroidaceae	Bacteroidales	Bacteroidia	Bacteroidetes	Bacteria
msp_0461	-0.00029151	0.000669737	0.663374	22	4.28995e-06	2.62254e-06	0.212269	64.5136	2.81798	5.08443	5.26015	9.47907	1.76954	8.30644	9.30506	4.96648	NA	7.4197	5.05387	4.70303	0.44927	NA	3.5379	1.53361	1.69331	0.492721	5.40837	9.61056	2.00164	3.60268	0.603449	3.26277	6.45593	1	0.930503	unclassified Clostridiales_msp_0461	unclassified Clostridiales	unclassified Clostridiales	Clostridiales	Clostridia	Firmicutes	Bacteria
msp_0462	0.000815149	0.000428513	0.0571352	23	8.81041e-07	9.44629e-07	0.156233	26.9641	1.36919	4.88011	4.98255	6.69178	1.41941	13.4479	12.8178	9.70007	NA	12.7565	9.87867	3.61665	0.416224	0.162594	1.90592	0.719526	0.873059	0.137382	0.919248	5.9591	0.844942	1.71723	1.08306	2.34808	2.72214	1	0.410117	unclassified Clostridiales_msp_0462	unclassified Clostridiales	unclassified Clostridiales	Clostridiales	Clostridia	Firmicutes	Bacteria
msp_0463	-0.000246119	0.000158622	0.120757	21	0	8.5626e-08	0.409211	0	1	0.216065	NA	NA	0.496035	30.2615	20.5956	1.99651	NA	7.24465	2.20167	0.360445	0.0287408	0.0134831	0.344599	0.0879611	0.111064	0.0286215	0.249333	35.1297	0.121935	0.136501	0.0312873	0.191213	0.152989	1	0.555484	Clostridium sp. CAG:167_msp_0463	unclassified Clostridiales	unclassified Clostridiales	Clostridiales	Clostridia	Firmicutes	Bacteria
msp_0464	-0.00218439	0.000786315	0.00546923	22	5.22629e-06	3.79487e-06	0.0128232	44.8576	1.81349	3.6527	2.99886	2.76319	1.76043	3.74519	6.05624	4.42943	NA	5.41638	1.63892	8.04655	1.90147	NA	6.5832	1.79121	3.35785	1.09023	6.96835	7.28283	2.59061	5.83112	8.84931	7.51511	5.7308	1	0.110389	unclassified Eubacterium_msp_0464	Eubacterium	Eubacteriaceae	Clostridiales	Clostridia	Firmicutes	Bacteria
msp_0465	-1.2234e-05	0.000104313	0.906637	20	7.04211e-10	4.30406e-08	0.0387025	0.28616	1.00287	0.66659	11.6967	NA	1.01275	25.4152	21.1809	0.618683	NA	14.3863	11.6191	0.416983	NA	NA	0.138163	0.112919	0.118399	0.0298748	0.10214	8.82295	1.73055	0.226589	0.0170406	0.240611	1.44744	1	0.977649	unclassified Verrucomicrobia_msp_0465	unclassified Verrucomicrobia	unclassified Verrucomicrobia	unclassified Verrucomicrobia	unclassified Verrucomicrobia	Verrucomicrobia	Bacteria
msp_0466	-0.00038534	0.000815472	0.636544	14	5.89078e-06	3.40813e-06	0.920219	90.6916	10.743	10.5819	NA	NA	8.58653	NA	NA	NA	NA	NA	8.82857	7.7898	NA	NA	8.41613	4.05273	4.22541	0.511222	5.47981	11.1122	NA	7.18021	3.67831	8.3747	11.1825	1	0.926509	unclassified Burkholderiales_msp_0466	unclassified Burkholderiales	unclassified Burkholderiales	Burkholderiales	Betaproteobacteria	Proteobacteria	Bacteria
msp_0467	0.000468082	0.000259338	0.0710891	23	1.80146e-07	2.85252e-07	0.280353	16.0939	1.19181	1.01994	1.82088	5.80783	10.1156	11.5427	34.9685	9.21315	NA	12.4947	4.06741	1.76532	0.116735	0.193705	0.829239	0.237543	0.320503	0.0692948	0.365916	2.71875	0.522915	0.417689	0.0533944	0.581698	0.756636	1	0.449806	Firmicutes bacterium CAG:94_msp_0467	unclassified Firmicutes	unclassified Firmicutes	unclassified Firmicutes	unclassified Firmicutes	Firmicutes	Bacteria
msp_0468	-0.00744848	0.00227853	0.00107934	23	6.88241e-05	3.38877e-05	1.02457e-06	68.0595	3.13082	4.93541	4.97874	4.12751	3.30662	4.96396	5.97376	5.8439	NA	6.11126	4.35103	6.71483	1.77051	0.279282	5.36504	4.18214	4.21791	1.46079	4.52917	6.72892	2.64865	5.27808	2.38624	4.95102	4.89521	1	0.0410566	Firmicutes bacterium CAG:41 _msp_0468	unclassified Firmicutes	unclassified Firmicutes	unclassified Firmicutes	unclassified Firmicutes	Firmicutes	Bacteria
msp_0469c	9.68627e-06	4.84465e-05	0.841529	6	4.22049e-09	7.92528e-09	0.478601	33.1745	1.49643	22.5414	NA	NA	NA	NA	NA	NA	NA	NA	NA	19.3569	NA	NA	11.9469	0.0981839	NA	NA	NA	45.0947	NA	NA	NA	NA	0.961913	1	0.969276	Bifidobacterium scardovii_msp_0469c	Bifidobacterium	Bifidobacteriaceae	Bifidobacteriales	Actinobacteria	Actinobacteria	Bacteria
msp_0470	-6.60966e-06	0.000592265	0.991096	9	6.95056e-07	1.3531e-06	0.494318	23.869	1.31352	NA	NA	7.38219	0.320171	21.0106	4.2341	8.8272	NA	13.2141	1.54354	NA	NA	NA	27.0746	NA	NA	NA	NA	16.3936	NA	NA	NA	NA	NA	1	0.996671	unclassified Bacteroides_msp_0470	Bacteroides	Bacteroidaceae	Bacteroidales	Bacteroidia	Bacteroidetes	Bacteria
msp_0471	0.000181724	0.000710677	0.798179	22	4.81547e-06	3.04777e-06	0.0926272	54.8617	2.21542	5.11926	4.68514	6.82877	3.96881	7.27829	8.92951	7.38033	NA	8.38877	6.97307	6.26251	1.05733	NA	4.01192	1.90466	2.35128	0.561445	3.18753	7.62335	2.29685	2.9608	0.738885	3.27055	4.22094	1	0.963528	unclassified Clostridiales_msp_0471	unclassified Clostridiales	unclassified Clostridiales	Clostridiales	Clostridia	Firmicutes	Bacteria
msp_0472	0.00136113	0.00111591	0.222561	9	4.65339e-06	5.35392e-06	0.137002	44.5218	1.80251	12.8829	NA	NA	NA	NA	NA	NA	NA	NA	NA	NA	9.72711	NA	14.7283	8.72727	7.8587	2.90495	17.7675	NA	NA	14.4849	NA	NA	10.9184	1	0.693351	unclassified Firmicutes_msp_0472	unclassified Firmicutes	unclassified Firmicutes	unclassified Firmicutes	unclassified Firmicutes	Firmicutes	Bacteria
msp_0473c	-0.00223952	0.000654205	0.000618716	22	4.52779e-06	2.69396e-06	0.00175578	55.7519	2.25998	6.10158	4.67767	4.82876	2.74826	5.91774	6.8322	5.65522	NA	6.80574	5.65146	7.20754	1.29611	NA	5.54768	3.40095	3.47805	0.782301	4.05205	7.63657	2.20045	4.26472	1.12635	4.12428	5.66431	1	0.0288656	Clostridium sp. 2789STDY5834874 _msp_0473c	unclassified Clostridiales	unclassified Clostridiales	Clostridiales	Clostridia	Firmicutes	Bacteria
msp_0474	0.000163514	7.84085e-05	0.0370321	16	0	2.51373e-08	0.573145	0	1	16.378	NA	NA	NA	12.3433	0.317236	NA	NA	66.5535	NA	0.385174	0.0243801	NA	0.422802	0.0586742	0.0955489	0.0231074	0.092105	2.73631	0.082841	0.169733	NA	0.0999095	0.217378	1	0.345564	Dakarella massiliensis_msp_0474	Dakarella	Sutterellaceae	Burkholderiales	Betaproteobacteria	Proteobacteria	Bacteria
msp_0475	0.000219051	0.000644053	0.733771	16	0	1.73267e-06	0.804879	0	1	25.0975	2.30538	4.64817	0.501945	2.15325	3.24881	NA	NA	3.08824	NA	3.03775	NA	NA	7.46164	NA	0.603586	NA	1.31672	18.6747	0.112465	8.73262	NA	0.553235	18.464	1	0.947934	Prevotella sp. CAG:891_msp_0475	Prevotella	Prevotellaceae	Bacteroidales	Bacteroidia	Bacteroidetes	Bacteria
msp_0476	3.99899e-06	0.000251844	0.987331	15	6.57837e-08	2.50043e-07	0.57878	6.87959	1.07388	16.9787	0.930187	NA	NA	NA	25.5704	2.58727	NA	NA	1.86967	11.4331	0.0770551	NA	22.5398	0.60329	0.223356	0.0820324	0.793086	5.96497	NA	8.53717	NA	1.80999	NA	1	0.996671	Prevotella sp. CAG:485_msp_0476	Prevotella	Prevotellaceae	Bacteroidales	Bacteroidia	Bacteroidetes	Bacteria
msp_0477	0.00266052	0.00234946	0.257468	22	6.84341e-05	3.5492e-05	2.35217e-05	64.932	2.8516	5.53986	5.19915	5.10486	2.55006	5.5625	6.46467	6.18288	NA	6.48278	4.84017	6.0533	0.987696	NA	5.22727	4.06379	3.89982	0.959857	4.90644	7.11622	2.77845	4.11872	2.96521	5.00537	3.99094	1	0.711961	Firmicutes bacterium CAG:83_msp_0477	unclassified Firmicutes	unclassified Firmicutes	unclassified Firmicutes	unclassified Firmicutes	Firmicutes	Bacteria
msp_0478	0.000709252	0.0016151	0.660561	23	4.13897e-05	1.74278e-05	3.93272e-10	78.2759	4.60319	5.32956	4.48787	4.84665	3.6127	4.85818	5.49562	4.92296	NA	5.53597	4.47403	5.77002	2.21512	0.967776	5.22128	4.52865	4.35214	1.57943	4.86223	5.81474	3.18571	4.95483	3.30905	4.65587	5.01963	1	0.930503	Clostridium phoceensis_msp_0478	Clostridium	Clostridiaceae	Clostridiales	Clostridia	Firmicutes	Bacteria
msp_0479	0.000425986	0.000322431	0.186445	22	1.51787e-07	5.51681e-07	0.543131	6.74462	1.07232	1.76869	1.26016	1.49683	0.773993	0.635133	3.55038	2.2223	NA	4.82483	0.940065	11.0804	0.0890328	NA	6.25749	5.70816	9.28285	2.35787	2.8322	5.30107	14.8706	1.0229	3.45282	9.79048	10.4818	1	0.650964	unclassified Erysipelotrichaceae_msp_0479	unclassified Erysipelotrichaceae	Erysipelotrichaceae	Erysipelotrichales	Erysipelotrichia	Firmicutes	Bacteria
msp_0480	-0.000137707	0.000561056	0.806114	22	1.90831e-06	1.55004e-06	0.384825	48.9539	1.95901	4.67977	1.8121	12.6576	2.7893	10.983	8.42089	8.23721	NA	8.92825	15.6144	1.44431	0.139623	NA	1.60448	0.586396	0.868583	0.244088	1.56815	12.6806	1.05787	0.744226	0.699495	1.24265	2.99705	1	0.963879	unclassified Clostridiales_msp_0480	unclassified Clostridiales	unclassified Clostridiales	Clostridiales	Clostridia	Firmicutes	Bacteria
msp_0481	-0.000581634	0.000436614	0.182812	19	6.90779e-07	8.59485e-07	0.140867	27.8162	1.38535	5.05853	1.30679	2.5497	0.22163	1.14746	10.7048	0.990943	NA	5.11963	2.62127	3.89055	NA	NA	1.36514	18.4973	NA	3.97126	1.61585	23.1305	NA	4.94818	0.316008	0.407832	12.1367	1	0.650535	Ruminococcus sp. CAG:579_msp_0481	Ruminococcus	Ruminococcaceae	Clostridiales	Clostridia	Firmicutes	Bacteria
msp_0482	0.000385936	0.000608768	0.526106	20	1.88443e-06	1.90473e-06	0.282495	35.9746	1.56188	15.495	3.26006	1.66354	1.38028	6.935	10.7858	2.20908	NA	6.55449	1.67261	3.09058	7.65581	NA	1.89053	1.51897	4.3068	0.393684	1.12537	4.3489	5.91469	3.6276	NA	16.1712	NA	1	0.889367	Mitsuokella multacida_msp_0482	Mitsuokella	Selenomonadaceae	Selenomonadales	Negativicutes	Firmicutes	Bacteria
msp_0483	0.000154529	0.00124329	0.901085	2	0	1.2751e-05	0.484437	0	1	NA	NA	NA	NA	NA	90.5314	NA	NA	NA	NA	NA	NA	NA	NA	NA	NA	NA	NA	9.4686	NA	NA	NA	NA	NA	1	0.977649	Veillonella sp. CAG:933_msp_0483	Veillonella	Veillonellaceae	Veillonellales	Negativicutes	Firmicutes	Bacteria
msp_0484	-0.0120644	0.00329095	0.000246446	23	0.000136414	7.05699e-05	2.57053e-05	63.8606	2.76706	5.45603	4.43786	4.59519	3.03571	5.09703	6.47146	5.5868	NA	6.08413	4.88145	6.47219	1.26004	1.77438	5.49869	3.0862	3.86313	1.18736	4.94968	6.91165	2.90892	5.1242	1.53923	4.79335	4.9853	0.48747	0.0147718	unclassified Faecalibacterium_msp_0484	Faecalibacterium	Ruminococcaceae	Clostridiales	Clostridia	Firmicutes	Bacteria
msp_0485	-0.00116561	0.000348374	0.000820251	13	0	4.8238e-07	0.999642	0	1	13.6673	6.10233	1.34514	2.76046	0.653383	1.05631	4.17614	NA	5.5049	1.7118	22.6259	NA	NA	NA	NA	NA	0.108755	NA	28.4438	NA	NA	NA	NA	11.8437	1	0.0352708	unclassified Bacteroides_msp_0485	Bacteroides	Bacteroidaceae	Bacteroidales	Bacteroidia	Bacteroidetes	Bacteria
msp_0486	0.000268939	0.000289942	0.353635	22	1.3829e-07	3.77971e-07	0.495558	7.90231	1.0858	0.878634	14.6039	4.38227	2.8848	3.50696	18.4245	1.81394	NA	20.0138	NA	12.5447	0.492595	0.0274135	1.32559	0.370178	0.617869	0.158655	1.98252	6.76595	0.627163	1.11348	0.681051	4.78808	1.99594	1	0.781434	Lactococcus lactis subsp. lactis_msp_0486	Lactococcus	Streptococcaceae	Lactobacillales	Bacilli	Firmicutes	Bacteria
msp_0487	0.000187234	0.000258942	0.469636	18	2.18069e-07	3.09372e-07	0.617653	22.0739	1.28327	2.96393	17.6649	NA	16.9091	8.62915	NA	NA	NA	NA	9.42254	5.75213	3.93402	NA	4.49206	1.3222	2.26336	0.141754	1.05146	16.8605	2.85563	1.15809	2.26876	1.36714	0.943288	1	0.852413	unclassified Clostridiales_msp_0487	unclassified Clostridiales	unclassified Clostridiales	Clostridiales	Clostridia	Firmicutes	Bacteria
msp_0488	2.1029e-05	0.000216507	0.922624	17	1.08489e-07	2.05712e-07	0.128231	15.6254	1.18519	27.2106	0.511033	3.24772	0.651566	0.756232	1.1454	3.32265	NA	1.13577	3.10315	17.3731	NA	NA	0.897273	9.24134	7.28622	NA	2.61561	2.67847	NA	9.52649	NA	9.29738	NA	1	0.977649	Acidaminococcus massiliensis_msp_0488	Acidaminococcus	Acidaminococcaceae	Acidaminococcales	Negativicutes	Firmicutes	Bacteria
msp_0489	-0.000515842	0.000615805	0.402216	23	3.06888e-06	2.1276e-06	0.0354838	54.4678	2.19625	1.8813	2.84075	8.1125	6.60287	6.97661	9.48507	6.96103	NA	9.78852	11.4845	4.18711	0.970264	0.274415	2.85101	2.52676	2.91682	0.377913	3.9599	9.83832	0.807612	1.86767	0.493171	2.19726	2.59863	1	0.808534	unclassified Blautia_msp_0489	Blautia	Lachnospiraceae	Clostridiales	Clostridia	Firmicutes	Bacteria
msp_0490	-0.000919868	0.00147829	0.533777	22	1.63683e-05	1.30308e-05	0.0263304	43.4858	1.76947	5.47013	5.46135	4.20118	1.95159	6.38878	9.81282	5.18072	NA	8.19044	4.25746	6.25453	1.21497	NA	4.76254	2.31392	3.19458	0.965801	3.65096	11.6393	1.35319	4.14225	0.845766	3.84287	4.90491	1	0.890207	unclassified_msp_0490	unclassified	unclassified	unclassified	unclassified	unclassified	unclassified
msp_0491	-2.26709e-06	0.000566204	0.996805	9	7.19344e-07	1.29581e-06	0.17724	27.1079	1.37189	NA	NA	NA	NA	NA	NA	NA	NA	NA	NA	10.048	10.9296	NA	7.27776	5.30542	8.55593	NA	NA	NA	NA	9.1678	0.915095	19.9704	27.83	1	0.998319	unclassified Anaerotruncus_msp_0491	Anaerotruncus	Ruminococcaceae	Clostridiales	Clostridia	Firmicutes	Bacteria
msp_0492	0.000270661	0.000203764	0.184077	21	1.979e-07	2.2991e-07	0.249639	26.3414	1.35762	5.25199	1.34952	11.1503	4.04921	3.54405	2.75897	8.56325	NA	3.48966	11.6543	12.356	NA	NA	2.56941	2.1497	1.4291	0.228332	1.02988	5.44255	8.48926	4.61523	3.85093	3.06703	2.9613	1	0.650535	unclassified Ruminococcaceae_msp_0492	unclassified Ruminococcaceae	Ruminococcaceae	Clostridiales	Clostridia	Firmicutes	Bacteria
msp_0493	0.000146589	0.000129139	0.256322	16	4.7829e-10	6.05943e-08	0.489807	0.113589	1.00114	1.29266	NA	NA	0.0689845	24.4079	0.229811	0.563215	NA	2.86519	0.585582	0.656678	NA	NA	0.30559	0.0572628	9.93311	NA	0.134152	58.2271	NA	0.515119	NA	0.103592	0.0540909	1	0.711087	Eubacterium sp. CAG:603 _msp_0493	Eubacterium	Eubacteriaceae	Clostridiales	Clostridia	Firmicutes	Bacteria
msp_0494	-3.8541e-05	0.000136268	0.777306	15	0	5.69221e-08	0.122838	0	1	0.165401	NA	NA	0.570717	NA	45.9192	NA	NA	45.3552	NA	0.203123	1.40995	NA	1.5117	0.0569316	0.0264291	0.181791	0.339252	NA	3.39182	0.201288	0.00378723	0.663439	NA	1	0.960102	unclassified_msp_0494	unclassified	unclassified	unclassified	unclassified	unclassified	unclassified
msp_0495	-9.02685e-05	0.000153557	0.556634	12	1.43866e-08	8.6963e-08	0.509583	4.67891	1.04909	NA	4.53629	3.89298	0.374989	0.411986	2.51319	9.27149	NA	0.90395	2.48387	33.4497	NA	NA	15.3225	NA	NA	NA	NA	26.8326	NA	NA	0.00645289	NA	NA	1	0.891291	unclassified Bacteroides_msp_0495	Bacteroides	Bacteroidaceae	Bacteroidales	Bacteroidia	Bacteroidetes	Bacteria
msp_0496	-0.000365719	0.000151801	0.0159874	14	1.12328e-08	7.34116e-08	0.346315	2.69205	1.02767	44.52	1.9382	0.149579	0.522983	0.778838	0.293016	1.38191	NA	0.592672	0.262881	2.37082	NA	NA	0.752427	NA	2.19066	NA	NA	42.806	NA	1.44001	NA	NA	NA	1	0.213669	unclassified Eubacterium_msp_0496	Eubacterium	Eubacteriaceae	Clostridiales	Clostridia	Firmicutes	Bacteria
msp_0497	0.00118906	0.000501093	0.0176479	20	1.68899e-06	1.37783e-06	0.0563824	46.0108	1.85222	1.69954	7.7195	0.477399	5.95536	3.29739	7.63624	6.28908	NA	8.2858	NA	13.3284	NA	NA	2.04671	1.97794	5.28999	3.14825	1.41227	7.75829	3.08428	1.90432	1.04344	6.3099	11.3359	1	0.22531	Enterococcus faecalis_msp_0497	Enterococcus	Enterococcaceae	Lactobacillales	Bacilli	Firmicutes	Bacteria
msp_0498	0.000229428	0.000459394	0.617488	19	5.84347e-07	9.93054e-07	0.280541	16.8005	1.20193	6.44984	19.7509	NA	0.871493	15.0423	4.85813	1.78625	NA	5.16065	4.38952	2.65618	NA	NA	1.71751	0.730476	0.94792	0.532681	3.64708	15.9289	0.583363	2.45866	NA	3.19873	9.2894	1	0.921641	Ruminococcus sp. CAG:488_msp_0498	Ruminococcus	Ruminococcaceae	Clostridiales	Clostridia	Firmicutes	Bacteria
msp_0499	-0.0002204	0.000160545	0.169809	13	0	2.58866e-07	0.331771	0	1	0.646029	NA	NA	0.136209	NA	NA	1.30424	NA	86.6831	NA	0.547267	NA	NA	0.545092	0.144337	0.508503	1.0448	3.84051	NA	NA	2.17697	1.10957	1.31337	NA	1	0.635566	Clostridium sp. CAG:590_msp_0499	unclassified Clostridiales	unclassified Clostridiales	Clostridiales	Clostridia	Firmicutes	Bacteria
msp_0500	9.44538e-05	0.00016913	0.576525	21	5.82755e-08	1.09161e-07	0.275338	11.7797	1.13353	0.688961	0.924814	7.50407	NA	13.9887	25.4284	17.3729	NA	24.5971	NA	0.986705	0.128065	0.0636186	0.710584	0.141324	0.242872	0.0311959	0.324111	4.9394	0.0988884	0.341351	0.0664861	0.78186	0.638468	1	0.900763	unclassified Firmicutes_msp_0500	unclassified Firmicutes	unclassified Firmicutes	unclassified Firmicutes	unclassified Firmicutes	Firmicutes	Bacteria
msp_0501	0.000532481	0.000434283	0.220155	17	0	8.2779e-07	0.148939	0	1	8.19335	0.857455	20.1454	NA	1.13172	8.69234	2.0939	NA	3.99699	0.352437	4.45409	NA	NA	1.00066	0.989206	NA	0.0971027	2.72314	2.83448	NA	7.63688	NA	23.3967	11.4041	1	0.693351	Megasphaera elsdenii_msp_0501	Megasphaera	Veillonellaceae	Veillonellales	Negativicutes	Firmicutes	Bacteria
msp_0502	0.000407811	0.000513452	0.427048	16	8.67759e-07	1.22009e-06	0.247573	25.1881	1.33669	16.868	2.24836	3.30081	0.993966	1.47081	4.07404	NA	NA	3.51217	0.205258	8.94764	NA	NA	21.892	9.37505	NA	NA	4.03927	11.0459	2.55094	NA	NA	5.06031	4.41549	1	0.821261	unclassified Bacteroides_msp_0502	Bacteroides	Bacteroidaceae	Bacteroidales	Bacteroidia	Bacteroidetes	Bacteria
msp_0503	5.8128e-05	0.000128073	0.649925	18	0	6.1692e-08	0.884007	0	1	3.91799	NA	NA	1.80553	6.36568	35.6958	NA	NA	27.4649	2.55493	0.706462	NA	NA	0.388464	0.221854	0.218626	0.112097	0.201574	9.65602	0.145522	0.935607	0.103566	0.960818	8.5445	1	0.9275	Coraliomargarita sp. CAG:312_msp_0503	Coraliomargarita	Puniceicoccaceae	Puniceicoccales	Opitutae	Verrucomicrobia	Bacteria
msp_0504	-0.000263246	0.000282821	0.351963	19	5.08749e-07	4.10277e-07	0.0429636	52.6083	2.11007	13.1804	5.32489	NA	6.10656	14.3706	7.82853	2.59402	NA	7.0897	1.3964	2.04774	1.50537	NA	3.35112	1.11338	0.859469	0.994712	9.52207	12.5236	NA	4.33998	NA	1.45645	4.395	1	0.781351	unclassified_msp_0504	unclassified	unclassified	unclassified	unclassified	unclassified	unclassified
msp_0505	8.40825e-05	8.1967e-05	0.304981	21	1.48139e-08	2.98774e-08	0.254031	12.0528	1.13705	6.8206	3.65935	2.61899	3.4178	1.27089	27.5614	17.773	NA	10.747	1.31335	3.90988	0.0604329	NA	2.45263	0.464428	3.6448	0.0639595	1.87916	9.17883	NA	1.36421	0.524259	0.666732	0.608347	1	0.742009	unclassified Oscillospiraceae_msp_0505	unclassified Oscillospiraceae	Oscillospiraceae	Clostridiales	Clostridia	Firmicutes	Bacteria
msp_0506	-0.000453508	0.00182384	0.803628	23	4.87625e-05	2.20253e-05	8.61526e-09	72.886	3.68813	4.36009	4.62977	4.69291	3.69104	4.98484	5.67429	5.50437	NA	5.67932	4.65707	6.22966	2.02743	0.366573	4.97799	4.28172	4.6865	1.80445	4.93905	5.99098	3.00838	5.06006	2.73495	5.02412	4.99445	1	0.963879	Dorea formicigenerans_msp_0506	Dorea	Lachnospiraceae	Clostridiales	Clostridia	Firmicutes	Bacteria
msp_0507	-0.00218665	0.00107387	0.0417267	22	1.09343e-05	7.25328e-06	0.0103843	50.3409	2.01373	4.96546	2.65385	4.74255	1.47563	2.81014	4.38918	3.76679	NA	5.16302	6.95433	7.03216	4.32834	NA	6.31814	3.91978	2.73426	0.724976	6.16512	7.58238	2.08624	4.06205	4.25432	5.06629	8.805	1	0.363592	unclassified Eubacterium_msp_0507	Eubacterium	Eubacteriaceae	Clostridiales	Clostridia	Firmicutes	Bacteria
msp_0508	-0.000499985	0.000491913	0.309434	13	1.05882e-06	1.12065e-06	0.180312	41.4503	1.70795	14.812	NA	NA	NA	NA	NA	NA	NA	NA	10.4498	9.99468	NA	NA	6.11042	1.57607	4.76955	0.171187	9.4836	18.6673	NA	4.35694	8.25186	8.74731	2.60931	1	0.746414	unclassified Bacteroidales_msp_0508	unclassified Bacteroidales	unclassified Bacteroidales	Bacteroidales	Bacteroidia	Bacteroidetes	Bacteria
msp_0509	0.00254427	0.00143654	0.0765417	23	3.00054e-05	1.36691e-05	5.11058e-07	73.8669	3.82657	4.98095	4.76528	4.569	3.65917	5.11554	6.07814	5.28422	NA	5.91197	4.76857	6.26266	1.84782	1.60821	5.23763	4.63748	4.07022	1.1981	4.40209	6.26651	2.68143	4.69636	2.48748	4.67487	4.79631	1	0.455047	Firmicutes bacterium CAG:114_msp_0509	unclassified Firmicutes	unclassified Firmicutes	unclassified Firmicutes	unclassified Firmicutes	Firmicutes	Bacteria
msp_0510	0.00131998	0.000501158	0.00844195	23	2.93554e-07	1.41037e-06	0.105031	5.09343	1.05367	1.72704	4.63277	1.41824	1.41411	2.47581	4.43101	6.53588	NA	7.24314	9.68237	16.6449	3.37239	0.103231	3.00942	3.62201	4.58449	0.209671	5.54903	9.21435	2.56697	3.70442	1.24595	3.27271	3.34007	1	0.149755	Clostridium glycyrrhizinilyticum_msp_0510	Lachnoclostridium	Lachnospiraceae	Clostridiales	Clostridia	Firmicutes	Bacteria
msp_0511	-0.000243121	0.000587962	0.679241	18	2.58927e-06	1.83135e-06	0.587355	61.6735	2.60916	4.21576	NA	3.09931	1.74856	8.57113	12.9378	10.2757	NA	NA	2.32576	4.29627	NA	NA	8.11367	1.54166	1.45561	0.34067	8.15266	7.07708	9.60199	2.03952	NA	4.67602	9.53075	1	0.930503	unclassified Bacteroidales_msp_0511	unclassified Bacteroidales	unclassified Bacteroidales	Bacteroidales	Bacteroidia	Bacteroidetes	Bacteria
msp_0512	0.000155908	0.00127844	0.902937	22	4.3751e-06	7.84887e-06	0.221712	14.3017	1.16688	1.75495	1.94564	5.90675	0.95131	7.83167	3.78924	3.41155	NA	7.7241	25.9931	3.93614	0.76578	NA	2.27255	1.70583	0.770906	1.352	2.68866	12.8362	0.605579	2.25248	0.110635	1.41398	9.98096	1	0.977649	Firmicutes bacterium CAG:321_msp_0512	unclassified Firmicutes	unclassified Firmicutes	unclassified Firmicutes	unclassified Firmicutes	Firmicutes	Bacteria
msp_0513	-0.000172026	0.000175659	0.327423	14	0	1.2423e-07	0.468581	0	1	0.947632	8.92769	NA	NA	52.9139	NA	14.1014	NA	NA	NA	2.20462	NA	NA	1.544	0.176446	0.266142	0.2141	3.30622	NA	0.584361	1.12296	NA	1.57128	12.1193	1	0.76335	unclassified Clostridiales_msp_0513	unclassified Clostridiales	unclassified Clostridiales	Clostridiales	Clostridia	Firmicutes	Bacteria
msp_0514	0.000334766	0.000850716	0.693942	3	9.47468e-07	2.19767e-06	0.172016	43.5462	1.77136	NA	NA	NA	NA	NA	NA	NA	NA	NA	NA	35.752	NA	NA	NA	NA	NA	NA	21.8551	NA	NA	42.3928	NA	NA	NA	1	0.93157	unclassified Clostridiales_msp_0514	unclassified Clostridiales	unclassified Clostridiales	Clostridiales	Clostridia	Firmicutes	Bacteria
msp_0515	-7.65765e-05	0.000101312	0.449738	16	2.71084e-08	4.5126e-08	0.359962	19.3022	1.23919	NA	7.58475	3.23706	0.57974	5.58691	15.068	3.15617	NA	13.3674	NA	6.38916	0.602755	NA	2.14197	1.50569	NA	0.183095	NA	23.9466	NA	2.26416	NA	1.20265	13.1839	1	0.840103	unclassified Clostridium_msp_0515	Clostridium	Clostridiaceae	Clostridiales	Clostridia	Firmicutes	Bacteria
msp_0516	2.31531e-06	0.00010763	0.982837	17	5.3445e-09	4.57264e-08	0.728858	2.46504	1.02527	6.22716	9.29389	NA	1.30095	NA	NA	10.4729	NA	24.9597	NA	2.10772	0.172008	NA	0.586159	6.18399	0.395665	0.238007	1.12511	31.2586	3.47025	1.51025	0.124501	0.573163	NA	1	0.994909	unclassified_msp_0516	unclassified	unclassified	unclassified	unclassified	unclassified	unclassified
msp_0517	-0.000424936	0.000327817	0.194886	15	7.32315e-07	5.37038e-07	0.526799	62.3526	2.65622	NA	4.75025	NA	1.89719	6.21418	6.42793	12.9344	NA	5.08245	10.9507	12.974	NA	NA	NA	5.87804	4.42555	NA	NA	11.6264	NA	9.54554	0.969367	6.10493	0.219063	1	0.662345	Bacteroidales bacterium H10_msp_0517	unclassified Muribaculaceae	Muribaculaceae	Bacteroidales	Bacteroidia	Bacteroidetes	Bacteria
msp_0518	-0.000296704	0.00072256	0.681345	19	6.38948e-06	3.07479e-06	0.00442219	97.9583	48.9795	4.07296	7.44977	NA	NA	8.06618	8.15196	7.91548	NA	8.15028	NA	6.58689	3.48526	NA	4.86737	2.88582	2.77511	1.44365	3.52476	8.13817	5.60922	3.27764	1.8395	6.00437	5.75561	1	0.930503	unclassified Actinobacteria_msp_0518	unclassified Actinobacteria	unclassified Actinobacteria	unclassified Actinobacteria	unclassified Actinobacteria	Actinobacteria	Bacteria
msp_0519	0.000189798	0.000458992	0.679232	5	0	8.07883e-07	0.198995	0	1	NA	NA	NA	NA	0.248806	NA	NA	NA	NA	NA	1.24682	NA	NA	8.29092	22.2171	NA	NA	NA	NA	NA	67.9963	NA	NA	NA	1	0.930503	Prevotella sp. CAG:924_msp_0519	Prevotella	Prevotellaceae	Bacteroidales	Bacteroidia	Bacteroidetes	Bacteria
msp_0520c	-0.000411638	0.000429468	0.340305	1	NA	NA	NA	NA	NA	NA	NA	NA	NA	NA	NA	NA	NA	NA	NA	NA	NA	NA	NA	NA	NA	NA	NA	NA	NA	NA	NA	NA	100	1	0.776783	Bacteroides gallinarum_msp_0520c	Bacteroides	Bacteroidaceae	Bacteroidales	Bacteroidia	Bacteroidetes	Bacteria
msp_0521	-0.000798091	0.000381018	0.036204	22	4.49753e-07	7.14373e-07	0.538227	16.106	1.19198	2.4105	7.88151	9.2979	4.68221	12.9998	13.1955	10.1374	NA	9.94346	3.1906	1.916	0.153848	NA	1.31493	0.402719	0.714461	0.24406	1.13361	14.2762	0.459913	2.44613	0.211567	1.47266	1.51502	1	0.34497	unclassified Firmicutes_msp_0521	unclassified Firmicutes	unclassified Firmicutes	unclassified Firmicutes	unclassified Firmicutes	Firmicutes	Bacteria
msp_0522	0.00199992	0.000575255	0.000507868	23	3.24565e-06	2.09675e-06	0.00504423	50.7324	2.02973	5.86393	3.88157	3.2496	2.57595	4.35238	7.9657	5.53661	NA	6.59027	5.41709	8.25716	1.5962	0.437862	5.67569	3.11441	3.80361	0.662109	3.40021	7.43394	2.49581	4.63654	5.31256	3.36858	4.37223	1	0.0251141	Anaerotruncus colihominis_msp_0522	Anaerotruncus	Ruminococcaceae	Clostridiales	Clostridia	Firmicutes	Bacteria
msp_0523	0.00025207	0.000290298	0.385224	3	0	1.64622e-06	0.776039	0	1	NA	NA	NA	NA	NA	NA	NA	NA	NA	NA	96.1773	NA	NA	NA	NA	NA	NA	NA	NA	NA	3.74186	NA	NA	0.080866	1	0.793721	unclassified Alistipes_msp_0523	Alistipes	Rikenellaceae	Bacteroidales	Bacteroidia	Bacteroidetes	Bacteria
msp_0524	2.34745e-06	0.000100616	0.981386	19	0	3.81707e-08	0.593198	0	1	0.270878	0.649918	17.8261	8.93042	6.3404	NA	16.4498	NA	42.6509	NA	1.69673	0.0966147	NA	0.379175	0.20692	0.177899	0.0761079	0.229151	2.12097	0.18104	0.207624	NA	1.01142	0.497906	1	0.994909	unclassified Lachnoclostridium_msp_0524	Lachnoclostridium	Lachnospiraceae	Clostridiales	Clostridia	Firmicutes	Bacteria
msp_0525	0.000242137	0.000203873	0.234958	14	3.69135e-08	1.68297e-07	0.283514	5.74728	1.06098	10.3028	3.28508	1.78493	0.239166	0.733826	44.1441	6.1614	NA	2.07042	NA	14.889	NA	NA	1.27303	NA	NA	0.84308	NA	10.4991	NA	2.86198	NA	0.912074	NA	1	0.700934	unclassified Bacteroidales_msp_0525	unclassified Bacteroidales	unclassified Bacteroidales	Bacteroidales	Bacteroidia	Bacteroidetes	Bacteria
msp_0526	0.000119476	0.000189676	0.528764	18	0	1.21562e-07	0.0983683	0	1	0.729989	4.06218	NA	1.75573	NA	NA	5.73018	NA	49.1592	NA	1.43666	0.665484	NA	0.636411	0.180821	0.185312	0.0337498	0.207322	33.4222	0.191042	0.245239	0.114068	0.492342	0.75215	1	0.889367	unclassified Firmicutes_msp_0526	unclassified Firmicutes	unclassified Firmicutes	unclassified Firmicutes	unclassified Firmicutes	Firmicutes	Bacteria
msp_0527	-0.000351323	0.000287337	0.221448	19	4.98388e-08	3.04444e-07	0.109222	2.87423	1.02959	2.47023	7.08021	NA	3.07308	29.1545	32.2826	4.90034	NA	NA	15.4757	0.382901	0.369029	NA	0.278629	0.157475	0.260917	0.0376114	2.19853	NA	0.208281	0.821216	0.0545006	0.646041	0.148284	1	0.693351	Clostridium sp. CAG:307_msp_0527	unclassified Clostridiales	unclassified Clostridiales	Clostridiales	Clostridia	Firmicutes	Bacteria
msp_0528	-0.00030898	0.000549815	0.574136	12	9.54531e-07	1.252e-06	0.280957	34.5923	1.52887	19.1232	10.8947	NA	NA	12.5053	NA	NA	NA	NA	NA	7.27745	NA	NA	5.70363	1.39135	2.85887	0.355547	3.66803	26.6889	NA	8.80693	0.726033	NA	NA	1	0.900763	unclassified Parabacteroides_msp_0528	Parabacteroides	Tannerellaceae	Bacteroidales	Bacteroidia	Bacteroidetes	Bacteria
msp_0529	-0.0022404	0.000991482	0.0238428	22	6.05111e-06	5.21316e-06	0.0249079	61.0841	2.56964	2.31648	3.64358	1.65264	1.76651	0.967113	4.14635	1.28148	NA	5.00713	4.30496	6.84671	0.479923	0.510237	3.20409	9.09388	6.11975	0.904293	1.90586	15.7105	3.55654	3.85122	NA	7.27099	15.4598	1	0.28072	Eubacterium sp. CAG:581_msp_0529	Eubacterium	Eubacteriaceae	Clostridiales	Clostridia	Firmicutes	Bacteria
msp_0530	-0.0034205	0.00156728	0.029077	23	1.92649e-05	1.51934e-05	0.0137407	39.1466	1.64329	4.31264	4.14804	4.62388	2.56411	6.42097	7.96494	6.21173	NA	6.61799	4.6086	7.67685	1.24306	0.465323	5.1004	2.96486	3.44685	0.754702	4.44242	8.841	1.53542	4.12351	0.887761	4.21794	6.82701	1	0.309899	Dorea longicatena 2_msp_0530	Dorea	Lachnospiraceae	Clostridiales	Clostridia	Firmicutes	Bacteria
msp_0531	-0.000291275	0.000272592	0.285277	2	0	1.18388e-06	0.693972	0	1	NA	NA	NA	NA	NA	NA	NA	NA	NA	NA	NA	NA	NA	NA	NA	4.65483	NA	NA	NA	NA	NA	NA	NA	95.3452	1	0.72689	unclassified Muribaculaceae_msp_0531	unclassified Muribaculaceae	Muribaculaceae	Bacteroidales	Bacteroidia	Bacteroidetes	Bacteria
msp_0532	-0.00037412	0.000256736	0.145058	15	3.86727e-07	3.14018e-07	0.0522059	58.7895	2.42657	11.3475	5.81087	NA	7.24916	15.917	11.7823	NA	NA	13.5143	NA	3.11263	1.14236	NA	2.98054	0.450939	3.91122	NA	NA	13.0907	3.6574	2.84748	NA	3.18558	NA	1	0.598079	unclassified_msp_0532	unclassified	unclassified	unclassified	unclassified	unclassified	unclassified
msp_0533	-0.00104916	0.000638298	0.100243	20	4.42533e-06	2.34341e-06	0.00130127	87.9187	8.27722	3.60212	8.43318	6.68337	NA	8.40189	6.13859	4.39346	NA	8.83024	9.0673	3.68713	1.42159	NA	4.99842	2.11889	1.99988	0.255078	7.21987	9.05349	0.92656	3.36116	NA	5.86289	3.54489	1	0.517683	unclassified Lachnospiraceae_msp_0533	unclassified Lachnospiraceae	Lachnospiraceae	Clostridiales	Clostridia	Firmicutes	Bacteria
msp_0534	-0.00174693	0.00085662	0.041417	23	1.1511e-06	3.41546e-06	0.272497	7.12066	1.07667	2.95276	2.41904	19.073	1.96555	4.88523	17.8887	2.22646	NA	8.20476	1.33545	3.47626	0.323446	0.293124	2.9235	1.39564	0.913361	0.236644	3.06751	17.5325	1.05903	0.890938	0.416247	2.09917	4.42164	1	0.36249	Firmicutes bacterium CAG:176_63_11_msp_0534	unclassified Firmicutes	unclassified Firmicutes	unclassified Firmicutes	unclassified Firmicutes	Firmicutes	Bacteria
msp_0535	-0.000121967	0.000274265	0.656532	18	0	3.11977e-07	0.472791	0	1	4.27113	20.2132	8.00771	NA	NA	NA	9.00407	NA	33.6037	3.41677	2.63755	0.158353	NA	1.70408	0.270566	0.565782	0.124617	1.73057	7.63685	NA	1.56531	0.955747	0.673321	3.4606	1	0.92825	unclassified Prevotellaceae_msp_0535	unclassified Prevotellaceae	Prevotellaceae	Bacteroidales	Bacteroidia	Bacteroidetes	Bacteria
msp_0536	0.000553709	0.000196444	0.00482234	16	0	1.64469e-07	0.328686	0	1	1.97368	5.56905	NA	NA	13.5798	NA	NA	NA	36.4157	9.47896	5.99234	NA	NA	5.49112	1.39235	2.32627	0.10644	1.89096	10.4577	NA	1.4885	0.349707	2.97994	0.507448	1	0.102829	unclassified Clostridiales_msp_0536	unclassified Clostridiales	unclassified Clostridiales	Clostridiales	Clostridia	Firmicutes	Bacteria
msp_0537	0.000539505	0.000463316	0.244244	13	0	7.73098e-07	0.824784	0	1	2.80116	NA	NA	NA	NA	NA	NA	NA	NA	5.29179	2.26984	0.517642	NA	0.774819	50.4128	4.10402	NA	1.25294	27.7915	0.15563	4.02507	NA	0.281515	0.321343	1	0.707343	Alistipes sp. An31A_msp_0537	Alistipes	Rikenellaceae	Bacteroidales	Bacteroidia	Bacteroidetes	Bacteria
msp_0538	0.00129108	0.00217337	0.552483	22	2.92108e-05	2.80824e-05	0.0127326	32.2955	1.47701	4.68945	3.96896	4.4929	4.71635	6.36232	9.0197	5.62145	NA	11.3955	2.28926	7.31592	1.15843	NA	4.33233	2.11551	1.93969	0.519472	4.46661	7.59768	2.10128	6.91873	0.535827	3.22833	5.21428	1	0.891291	Phascolarctobacterium succinatutens_msp_0538	Phascolarctobacterium	Acidaminococcaceae	Acidaminococcales	Negativicutes	Firmicutes	Bacteria
msp_0539	1.40915e-05	7.07802e-05	0.842194	15	0	1.99355e-08	0.368488	0	1	2.95545	NA	NA	NA	6.22667	19.6582	1.20726	NA	7.23714	1.83444	2.44869	NA	NA	0.561202	NA	0.170694	NA	3.12268	39.1537	NA	0.707886	0.112329	3.01966	11.5841	1	0.969276	unclassified Roseburia_msp_0539	Roseburia	Lachnospiraceae	Clostridiales	Clostridia	Firmicutes	Bacteria
msp_0540	-9.63966e-06	7.51102e-05	0.89788	15	7.18879e-09	2.19922e-08	0.375669	8.70192	1.09531	5.85523	11.1471	NA	NA	NA	19.1319	18.6848	NA	6.91343	3.09076	0.296437	NA	NA	2.22191	0.341832	0.309253	NA	NA	29.6091	NA	0.260268	0.0523501	1.35235	0.73323	1	0.977649	Clostridium sp. CAG:448_msp_0540	unclassified Clostridiales	unclassified Clostridiales	Clostridiales	Clostridia	Firmicutes	Bacteria
msp_0541	0.00137888	0.000504565	0.00627952	21	2.76031e-06	1.47073e-06	0.00206952	81.8541	5.51089	4.74335	4.31789	NA	6.19349	8.52088	9.01798	7.83676	NA	7.79168	8.95613	5.98497	6.75385	NA	3.05748	0.841181	1.70528	0.558157	1.61	7.11502	7.03506	1.1411	1.62353	1.71442	3.4818	1	0.121773	unclassified Clostridiales_msp_0541	unclassified Clostridiales	unclassified Clostridiales	Clostridiales	Clostridia	Firmicutes	Bacteria
msp_0542	-0.00313923	0.000828242	0.000150507	23	5.42498e-06	4.28242e-06	0.0137615	40.947	1.69339	5.01455	4.63799	3.69048	1.88475	5.19308	6.36077	5.44501	NA	6.62383	6.47167	7.4579	1.88562	0.429764	5.24402	4.41942	3.45379	1.0523	4.07603	10.661	2.23417	3.50828	1.54108	3.81047	4.90406	0.297703	0.0116848	Clostridium sp. CAG:230_msp_0542	unclassified Clostridiales	unclassified Clostridiales	Clostridiales	Clostridia	Firmicutes	Bacteria
msp_0543c	-0.000222608	0.000373136	0.550784	3	0	4.32862e-07	0.614971	0	1	NA	NA	NA	NA	NA	NA	NA	NA	51.9901	NA	NA	NA	NA	NA	NA	NA	NA	NA	NA	35.3133	12.6967	NA	NA	NA	1	0.891291	Alistipes sp. CHKCI003_msp_0543c	Alistipes	Rikenellaceae	Bacteroidales	Bacteroidia	Bacteroidetes	Bacteria
msp_0544c	1.17092e-05	8.30921e-05	0.887935	7	9.81324e-09	2.27124e-08	0.542126	22.5818	1.29169	NA	NA	0.453417	2.44855	4.24305	36.2836	9.33937	NA	2.63505	NA	NA	NA	NA	NA	NA	NA	NA	NA	44.597	NA	NA	NA	NA	NA	1	0.977649	Escherichia fergusonii_msp_0544c	Escherichia	Enterobacteriaceae	Enterobacterales	Gammaproteobacteria	Proteobacteria	Bacteria
msp_0545	0.00113053	0.000353591	0.00138732	23	4.47789e-07	6.42385e-07	0.068881	18.2597	1.22339	4.82417	2.34624	7.89631	7.92867	6.83942	10.2095	13.6922	NA	15.9251	5.29148	3.62346	0.641354	0.590554	3.14773	0.520124	0.782937	0.196258	0.763739	8.37596	1.10653	1.66451	0.358454	1.52075	1.75447	1	0.0481425	Pseudoflavonifractor sp. An184_msp_0545	Pseudoflavonifractor	unclassified Clostridiales	Clostridiales	Clostridia	Firmicutes	Bacteria
msp_0546	-0.00454602	0.00148534	0.00220904	23	1.28813e-05	1.292e-05	0.0153737	30.2869	1.43445	4.8594	6.17184	4.89705	1.50903	6.26589	7.47176	5.64911	NA	8.03669	3.40804	5.99725	0.980374	0.842866	4.23222	2.47248	1.1532	0.565683	4.93296	12.9969	2.45712	3.04976	0.790348	2.57357	8.68644	1	0.0682732	Clostridium sp. CAG:245_msp_0546	unclassified Clostridiales	unclassified Clostridiales	Clostridiales	Clostridia	Firmicutes	Bacteria
msp_0547	0.000127885	0.000534327	0.810843	19	1.48593e-06	1.52165e-06	0.131332	33.9526	1.51407	7.20568	6.97515	9.18527	1.26772	5.497	11.7425	7.79405	NA	8.16875	4.96179	4.16373	NA	NA	1.72745	NA	2.3711	0.591512	1.74219	15.2258	NA	2.65733	1.79772	2.91851	4.00677	1	0.963879	unclassified Bacteroidales_msp_0547	unclassified Bacteroidales	unclassified Bacteroidales	Bacteroidales	Bacteroidia	Bacteroidetes	Bacteria
msp_0548	-0.000269207	0.0003428	0.432266	20	8.08208e-07	6.24708e-07	0.102572	53.4424	2.14788	13.4158	3.60912	0.776627	0.668838	9.21237	1.95697	2.1631	NA	3.04502	5.56724	4.27453	NA	NA	1.99152	3.39152	4.36829	0.674972	7.7676	11.3713	NA	12.2555	1.49795	3.86993	8.12171	1	0.824949	unclassified Eubacterium_msp_0548	Eubacterium	Eubacteriaceae	Clostridiales	Clostridia	Firmicutes	Bacteria
msp_0549	0.000332177	0.000303619	0.273929	12	0	3.90531e-07	0.641568	0	1	NA	4.75912	4.92782	NA	19.7362	NA	NA	NA	19.148	NA	9.83099	NA	NA	7.35636	1.01108	14.0606	0.0266407	3.08561	1.88127	NA	NA	NA	NA	14.1763	1	0.719022	unclassified Prevotella_msp_0549	Prevotella	Prevotellaceae	Bacteroidales	Bacteroidia	Bacteroidetes	Bacteria
msp_0550	-0.000128857	0.00031292	0.680494	10	1.8296e-07	3.49211e-07	0.615991	22.5245	1.29073	NA	NA	NA	NA	NA	NA	NA	NA	NA	NA	28.8155	NA	NA	4.71383	15.5202	5.87627	0.303584	NA	36.7408	NA	1.42602	0.765832	1.76731	4.07072	1	0.930503	unclassified Lachnospiraceae_msp_0550	unclassified Lachnospiraceae	Lachnospiraceae	Clostridiales	Clostridia	Firmicutes	Bacteria
msp_0551	-0.0029438	0.00109664	0.00726655	22	1.23085e-05	7.61167e-06	0.00492047	54.957	2.2201	4.65161	4.22926	3.45036	2.38435	4.37392	5.85302	4.49197	NA	6.3633	5.13026	7.0232	3.53699	NA	6.19385	5.66985	2.53401	1.09855	4.79747	8.65522	1.86948	3.8946	1.3698	5.73523	6.6937	1	0.134329	Eubacterium sp. CAG:192_msp_0551	Eubacterium	Eubacteriaceae	Clostridiales	Clostridia	Firmicutes	Bacteria
msp_0552	0.000345383	0.00017834	0.0527875	20	1.31543e-07	1.55416e-07	0.208187	26.7944	1.36602	5.86198	2.81168	NA	10.3253	5.89786	17.3565	10.7954	NA	15.728	NA	1.77206	0.421429	NA	2.6166	0.872552	1.00765	0.118089	1.10795	7.33779	7.84934	1.36126	3.01204	1.55894	2.18756	1	0.397574	unclassified Clostridiales_msp_0552	unclassified Clostridiales	unclassified Clostridiales	Clostridiales	Clostridia	Firmicutes	Bacteria
msp_0553	-0.000157865	0.00039622	0.690314	22	6.86606e-07	8.11619e-07	0.16823	24.8537	1.33074	2.33872	3.64033	8.55184	1.9084	8.9683	13.1504	5.70517	NA	9.99853	5.66797	3.78519	0.440023	NA	2.16813	0.738845	0.939444	0.192574	2.82669	16.1479	1.30005	1.9155	0.557237	1.41399	7.64475	1	0.930503	unclassified Clostridiales_msp_0553	unclassified Clostridiales	unclassified Clostridiales	Clostridiales	Clostridia	Firmicutes	Bacteria
msp_0554	-0.00204408	0.00121829	0.0933816	22	1.64066e-05	8.80554e-06	0.00961447	75.495	4.0808	2.99588	7.80894	7.89523	6.31859	8.37775	7.49172	3.76503	NA	7.09588	8.45945	4.97867	1.58038	NA	3.54075	2.36556	2.15006	0.591059	2.86228	8.54581	0.733175	3.14098	0.710518	3.07693	5.51534	1	0.503294	Anaerostipes hadrus 2_msp_0554	Anaerostipes	Lachnospiraceae	Clostridiales	Clostridia	Firmicutes	Bacteria
msp_0555	0.000258089	0.00050945	0.612433	21	1.27418e-06	1.14997e-06	0.194638	57.4707	2.35132	3.06548	3.2293	18.6361	NA	19.9034	7.83586	9.19818	NA	14.711	3.06985	1.85075	0.236653	NA	1.46194	0.451098	0.52041	0.10666	1.09648	10.8008	1.27274	0.894489	0.180191	0.804805	0.6739	1	0.919242	Subdoligranulum sp. CAG:314_msp_0555	Subdoligranulum	Ruminococcaceae	Clostridiales	Clostridia	Firmicutes	Bacteria
msp_0556	0.000107377	0.000106381	0.3128	11	0	3.47809e-08	0.492467	0	1	50.1461	NA	NA	NA	NA	NA	NA	NA	41.8951	NA	0.749255	NA	NA	0.637017	0.493736	1.89098	NA	1.11549	NA	0.496409	0.937217	0.161789	NA	1.4769	1	0.750871	unclassified Firmicutes_msp_0556	unclassified Firmicutes	unclassified Firmicutes	unclassified Firmicutes	unclassified Firmicutes	Firmicutes	Bacteria
msp_0557	0.00101085	0.00131187	0.440979	7	9.12331e-06	6.66571e-06	0.0345847	96.4697	28.3259	NA	14.2268	16.6513	2.69586	13.3149	18.7741	NA	NA	15.6572	NA	18.6799	NA	NA	NA	NA	NA	NA	NA	NA	NA	NA	NA	NA	NA	1	0.831215	unclassified_msp_0557	unclassified	unclassified	unclassified	unclassified	unclassified	unclassified
msp_0558	-0.000517606	0.000562084	0.357119	22	2.71329e-06	1.91323e-06	0.00365332	48.478	1.94092	2.91362	3.58306	6.81737	3.77928	5.76343	7.122	4.4721	NA	7.66074	6.36771	6.09501	0.748172	NA	4.8514	2.70946	2.92072	0.958799	3.0922	10.0786	1.36981	3.45801	1.27077	8.35169	5.6161	1	0.781434	unclassified Blautia_msp_0558	Blautia	Lachnospiraceae	Clostridiales	Clostridia	Firmicutes	Bacteria
msp_0559	-0.00103927	0.000347069	0.00274957	21	1.1044e-06	7.16419e-07	0.0680624	55.9448	2.26988	8.6354	7.09311	3.28484	2.26787	4.91074	6.06407	1.93017	NA	5.06317	1.72025	3.62253	4.21112	NA	5.69072	1.44201	0.771629	1.16055	5.6056	9.60219	NA	8.96667	5.92345	6.5423	5.49159	1	0.07998	unclassified Lachnospiraceae_msp_0559	unclassified Lachnospiraceae	Lachnospiraceae	Clostridiales	Clostridia	Firmicutes	Bacteria
msp_0560	0.000205603	0.00017048	0.227809	18	7.90135e-08	1.06198e-07	0.0649379	26.8672	1.36738	1.23514	1.55565	NA	NA	20.9213	32.787	6.42299	NA	24.7487	NA	1.66341	0.205149	NA	1.19439	0.252059	0.302683	0.0448931	0.493302	5.75303	NA	0.383045	0.178608	0.747382	1.11127	1	0.69687	unclassified Firmicutes_msp_0560	unclassified Firmicutes	unclassified Firmicutes	unclassified Firmicutes	unclassified Firmicutes	Firmicutes	Bacteria
msp_0561	-0.0004583	0.000222913	0.0397861	22	3.41191e-07	2.85253e-07	0.0722111	40.6332	1.68444	9.61367	4.46199	12.4855	0.808953	8.39886	6.80696	4.77193	NA	8.5153	4.21058	3.36066	1.53853	NA	3.93798	2.43495	1.3975	0.411254	4.57096	8.13758	1.2033	3.07016	1.79561	2.65476	5.41299	1	0.356595	unclassified Clostridiales_msp_0561	unclassified Clostridiales	unclassified Clostridiales	Clostridiales	Clostridia	Firmicutes	Bacteria
msp_0562	0.000251564	0.000274341	0.359155	22	2.1486e-07	3.70298e-07	0.0621313	14.6639	1.17184	1.399	1.26962	0.940509	1.40522	2.43534	13.5933	7.88345	NA	7.13546	4.61339	13.7793	0.0287977	NA	0.995887	1.44458	1.87891	0.230356	0.848665	14.5866	0.664234	5.38688	2.018	4.23274	13.2296	1	0.781434	Enorma massiliensis_msp_0562	Enorma	Coriobacteriaceae	Coriobacteriales	Coriobacteriia	Actinobacteria	Bacteria
msp_0563	-0.00280374	0.000802676	0.000477645	23	7.79694e-06	4.18657e-06	0.000285639	60.847	2.55408	4.60874	4.55882	4.83215	2.76381	5.35076	6.52801	5.4792	NA	5.83957	5.54582	6.67735	1.47023	0.389405	5.44968	3.87165	4.09709	1.48759	4.74508	7.01452	2.49386	5.03246	2.48134	4.37191	4.91095	0.944781	0.0245695	unclassified Clostridium_msp_0563	Clostridium	Clostridiaceae	Clostridiales	Clostridia	Firmicutes	Bacteria
msp_0564	-0.000183607	0.000197242	0.351921	15	0	1.4385e-07	0.117843	0	1	1.88422	NA	NA	NA	NA	21.0009	4.57957	NA	NA	NA	1.28355	0.100274	NA	3.52009	0.393355	0.692574	0.0234032	1.03584	21.2272	0.534387	2.98338	NA	36.5447	4.19658	1	0.781351	Fusobacterium sp. CAG:439_msp_0564	Fusobacterium	Fusobacteriaceae	Fusobacteriales	Fusobacteriia	Fusobacteria	Bacteria
msp_0565	0.00187781	0.000755016	0.0128783	23	6.26273e-06	3.63375e-06	0.0614794	58.0969	2.38646	4.75437	4.59335	2.69177	3.60207	4.50064	7.93664	6.33509	NA	7.16075	6.80154	5.79701	1.2325	0.196843	4.68901	3.28218	3.31233	1.14788	4.31338	7.3467	2.16291	3.87276	4.7375	4.40985	5.12294	1	0.195948	unclassified Ruminococcaceae_msp_0565	unclassified Ruminococcaceae	Ruminococcaceae	Clostridiales	Clostridia	Firmicutes	Bacteria
msp_0566	-7.38098e-05	8.21657e-05	0.369023	19	0	2.35322e-08	0.057131	0	1	0.314567	3.03514	NA	NA	2.42603	NA	6.16057	NA	33.3909	29.3293	0.682017	0.0706701	NA	0.274173	0.210883	0.181272	0.0384764	0.248514	21.0614	0.147909	0.16712	0.0549859	1.26949	0.936546	1	0.781539	unclassified Firmicutes_msp_0566	unclassified Firmicutes	unclassified Firmicutes	unclassified Firmicutes	unclassified Firmicutes	Firmicutes	Bacteria
msp_0567	-0.000343292	0.00059552	0.564306	14	1.00757e-06	1.26956e-06	0.169478	41.8409	1.71942	9.23184	NA	NA	NA	NA	NA	18.119	NA	27.8356	NA	1.24344	0.427129	NA	1.42265	0.364688	0.596064	NA	3.17931	33.6265	NA	0.368076	0.978124	2.42561	0.181918	1	0.897506	Firmicutes bacterium CAG:475_msp_0567	unclassified Firmicutes	unclassified Firmicutes	unclassified Firmicutes	unclassified Firmicutes	Firmicutes	Bacteria
msp_0568	-0.000904299	0.00096603	0.349222	11	2.35256e-06	3.86361e-06	0.401099	27.3789	1.37701	NA	NA	NA	NA	3.54308	NA	NA	NA	NA	6.69769	2.93319	NA	NA	2.72332	NA	1.83753	11.3722	4.76234	34.5915	NA	13.5167	4.80844	13.2141	NA	1	0.781351	Prevotella sp. CAG:1124_msp_0568	Prevotella	Prevotellaceae	Bacteroidales	Bacteroidia	Bacteroidetes	Bacteria
msp_0569	0.000238975	0.000228917	0.296514	19	0	1.74817e-07	0.390167	0	1	0.597844	NA	NA	0.169556	NA	0.617525	1.74083	NA	54.2914	2.2318	0.865241	0.0232296	0.00405243	4.60874	0.0836821	0.0633347	0.104782	0.393341	32.9132	0.0742911	0.341618	NA	0.825411	0.050076	1	0.730433	Anaerotruncus sp. CAG:528_msp_0569	Anaerotruncus	Ruminococcaceae	Clostridiales	Clostridia	Firmicutes	Bacteria
msp_0570	0.00186454	0.000655896	0.00447278	22	3.01013e-06	2.43705e-06	0.000317558	51.1541	2.04726	2.96835	3.70365	2.68615	4.32929	4.71581	4.61795	3.11553	NA	9.75134	2.47739	12.6065	1.97382	NA	4.22869	2.42751	2.67891	0.32728	2.71696	6.28116	3.48161	2.87621	0.664407	7.98611	13.3853	1	0.102325	Bifidobacterium dentium_msp_0570	Bifidobacterium	Bifidobacteriaceae	Bifidobacteriales	Actinobacteria	Actinobacteria	Bacteria
msp_0571	0.000127841	0.00084	0.879036	9	1.36893e-06	2.23649e-06	0.357075	42.5031	1.73922	NA	0.873674	NA	0.668139	0.621581	3.04863	1.39738	NA	4.45442	0.398455	NA	NA	NA	38.8212	NA	NA	NA	NA	49.7165	NA	NA	NA	NA	NA	1	0.977649	unclassified Eubacterium_msp_0571	Eubacterium	Eubacteriaceae	Clostridiales	Clostridia	Firmicutes	Bacteria
msp_0572	-0.00471851	0.00168992	0.00523599	23	4.0966e-05	1.88491e-05	5.29546e-06	71.9853	3.56956	5.09659	5.04768	4.17613	3.5359	5.1051	5.54905	5.02535	NA	5.79827	4.5439	6.37678	1.95139	0.290442	5.38142	4.18313	4.38726	1.59687	4.65428	6.19051	3.2063	5.3846	2.83185	4.7804	4.9068	1	0.106771	Lachnospira sp. 2789STDY5834967 _msp_0572	Lachnospira	Lachnospiraceae	Clostridiales	Clostridia	Firmicutes	Bacteria
msp_0573	0.00325264	0.00110653	0.00328755	23	1.15596e-05	7.7526e-06	0.00694107	50.3874	2.01562	3.37769	4.88531	2.63648	2.65003	4.83333	5.87551	6.34241	NA	6.00564	5.21127	9.38196	2.0431	0.328809	5.61576	3.44191	3.80018	0.835622	4.7054	8.32126	2.00999	3.87814	4.51072	4.77284	4.53664	1	0.0831138	Eggerthella lenta_msp_0573	Eggerthella	Eggerthellaceae	Eggerthellales	Coriobacteriia	Actinobacteria	Bacteria
msp_0574c	0.000535346	0.000221085	0.0154589	6	0	1.65117e-07	0.970129	0	1	14.5851	NA	NA	NA	NA	NA	NA	NA	NA	NA	NA	0.621245	NA	2.55172	NA	NA	NA	12.4098	28.2435	NA	NA	NA	41.5887	NA	1	0.208924	Fusobacterium necrophorum_msp_0574c	Fusobacterium	Fusobacteriaceae	Fusobacteriales	Fusobacteriia	Fusobacteria	Bacteria
msp_0575	8.97852e-05	0.00013858	0.517053	14	1.88919e-08	7.90415e-08	0.583405	6.92799	1.07444	5.35283	5.73204	NA	NA	8.23629	NA	NA	NA	25.6994	NA	NA	0.418865	NA	23.5671	0.787216	1.58555	0.498104	NA	6.40713	0.363404	6.26625	NA	12.7243	2.36153	1	0.889367	Eubacteriaceae bacterium CHKCI004 _msp_0575	Eubacterium	Eubacteriaceae	Clostridiales	Clostridia	Firmicutes	Bacteria
msp_0576	-0.00177217	0.000762267	0.0200788	22	4.83609e-06	3.61408e-06	0.0223567	44.0315	1.78672	6.29002	2.47635	4.01079	1.28292	4.34866	5.94089	4.05017	NA	5.66982	3.2532	7.33059	4.01089	NA	7.12625	2.64051	2.7748	0.332061	9.85004	7.24146	3.69261	4.67343	3.04396	5.62227	4.33831	1	0.24516	unclassified Lachnospiraceae_msp_0576	unclassified Lachnospiraceae	Lachnospiraceae	Clostridiales	Clostridia	Firmicutes	Bacteria
msp_0577	0.000104916	6.45027e-05	0.103837	19	0	1.92067e-08	0.614407	0	1	8.50608	1.40304	NA	1.87975	1.7354	26.6139	3.84086	NA	9.30468	2.21448	11.6113	0.245116	NA	8.10569	1.04103	6.76685	0.130504	7.04543	7.67062	0.662445	0.220558	NA	1.00228	NA	1	0.521052	Clostridium sp. CAG:1013_msp_0577	unclassified Clostridiales	unclassified Clostridiales	Clostridiales	Clostridia	Firmicutes	Bacteria
msp_0578	-0.00257786	0.00102381	0.0118054	22	1.53499e-06	5.27e-06	0.468283	6.76643	1.07257	3.81906	3.30692	4.80927	1.08267	6.98792	7.46762	4.25998	NA	8.62573	4.17755	3.73428	0.402213	NA	2.99973	1.56154	0.849326	0.531046	3.33848	26.2219	8.99408	2.99696	0.20886	2.26173	1.36311	1	0.185152	Clostridium sp. CAG:269_msp_0578	unclassified Clostridiales	unclassified Clostridiales	Clostridiales	Clostridia	Firmicutes	Bacteria
msp_0579	4.44037e-05	4.88197e-05	0.363063	16	6.11307e-10	8.69609e-09	0.499747	1.19061	1.01205	0.328344	1.83819	0.720923	NA	4.36359	NA	22.6089	NA	13.5767	NA	1.92881	0.0116874	NA	1.41115	NA	0.806823	0.0139953	0.492687	51.435	NA	0.140361	NA	0.0863923	0.23647	1	0.781434	unclassified Lachnospiraceae_msp_0579	unclassified Lachnospiraceae	Lachnospiraceae	Clostridiales	Clostridia	Firmicutes	Bacteria
msp_0580	9.79228e-05	0.000733601	0.893812	10	5.78862e-07	2.05407e-06	0.670878	10.4123	1.11622	NA	0.469374	NA	NA	4.42672	0.797857	5.63446	NA	3.89778	3.39703	NA	NA	NA	8.5146	NA	NA	NA	NA	22.0925	NA	NA	NA	11.649	39.1207	1	0.977649	unclassified Fusobacterium_msp_0580	Fusobacterium	Fusobacteriaceae	Fusobacteriales	Fusobacteriia	Fusobacteria	Bacteria
msp_0581	-0.000784937	0.000585538	0.18007	22	1.85477e-06	2.01189e-06	0.0755541	27.6304	1.3818	3.94449	3.06749	3.32272	1.18046	4.44773	7.35417	5.63739	NA	6.92831	8.4688	8.70537	0.939817	NA	4.66661	3.23019	1.80436	0.491531	4.1364	10.2791	1.32452	3.32635	1.9121	4.91402	9.9181	1	0.64642	Firmicutes bacterium CAG:212 _msp_0581	unclassified Firmicutes	unclassified Firmicutes	unclassified Firmicutes	unclassified Firmicutes	Firmicutes	Bacteria
msp_0582	-0.000240836	0.00037031	0.515458	11	3.78438e-08	5.73281e-07	0.495025	2.39333	1.02452	23.5808	NA	NA	1.56891	8.32448	NA	7.1977	NA	16.0271	NA	3.60134	NA	NA	2.03227	NA	3.23374	NA	16.5795	NA	NA	4.05562	NA	13.7986	NA	1	0.889367	Clostridium sp. CAG:632_msp_0582	unclassified Clostridiales	unclassified Clostridiales	Clostridiales	Clostridia	Firmicutes	Bacteria
msp_0583	0.000408351	0.000242768	0.0925572	22	2.39309e-07	2.92305e-07	0.0451203	23.1751	1.30166	2.52484	2.44272	7.28029	3.37308	12.707	15.5895	13.9735	NA	9.81188	9.84276	3.53231	0.109545	NA	1.66157	0.6107	0.652854	0.203809	2.00375	6.92119	1.97964	0.923553	0.418919	0.975634	2.461	1	0.500213	unclassified Gemmiger_msp_0583	Gemmiger	Ruminococcaceae	Clostridiales	Clostridia	Firmicutes	Bacteria
msp_0584	-0.000950604	0.000634152	0.13387	22	2.87792e-06	2.25353e-06	0.0409374	47.2793	1.89679	3.01833	3.9824	7.31071	0.580011	4.03272	11.8146	4.57326	NA	9.15132	12.2959	8.0137	1.47469	NA	4.21026	1.91743	2.36202	0.403122	3.75592	8.97442	1.2172	2.60888	1.1191	3.16233	4.0216	1	0.576894	Eggerthella sp. CAG:298_msp_0584	Eggerthella	Eggerthellaceae	Eggerthellales	Coriobacteriia	Actinobacteria	Bacteria
msp_0585	0.0014088	0.000954846	0.1401	21	5.68777e-07	3.89318e-06	0.179387	2.7969	1.02877	1.33588	1.20864	6.28382	1.0165	17.4783	29.3208	4.89983	NA	7.60591	NA	4.83632	0.346793	NA	1.51045	0.698737	0.873106	0.220337	1.70711	14.9445	1.17392	1.45783	0.142424	0.986281	1.95254	1	0.589612	Methanobrevibacter smithii 1_msp_0585	Methanobrevibacter	Methanobacteriaceae	Methanobacteriales	Methanobacteria	Euryarchaeota	Archaea
msp_0586	-0.00242825	0.0018996	0.201146	22	3.53948e-05	2.16467e-05	0.00359086	59.3331	2.459	5.13079	5.34841	4.93625	1.42963	7.76183	6.91297	4.25469	NA	8.40732	7.56769	5.28494	1.67984	NA	2.89242	3.18214	2.66827	0.632181	3.54127	9.29445	0.925298	3.1795	0.911421	6.68012	7.37856	1	0.670293	Clostridium sp. CAG:343_msp_0586	unclassified Clostridiales	unclassified Clostridiales	Clostridiales	Clostridia	Firmicutes	Bacteria
msp_0587	0.000272289	0.000422673	0.519441	12	1.1357e-06	8.28599e-07	0.517672	79.2422	4.81748	15.391	3.56547	1.25064	9.2014	3.65341	10.1253	11.8344	NA	5.09852	NA	NA	NA	NA	14.7499	NA	NA	NA	NA	5.28586	NA	NA	NA	7.02281	12.8213	1	0.889367	unclassified Fusobacterium_msp_0587	Fusobacterium	Fusobacteriaceae	Fusobacteriales	Fusobacteriia	Fusobacteria	Bacteria
msp_0588	0.000207819	0.000102207	0.0420197	21	2.39468e-09	3.70871e-08	0.295149	0.849805	1.00857	0.808604	1.03433	NA	2.44912	4.09879	40.4373	2.29197	NA	34.9754	NA	1.82603	0.304552	0.0304901	1.597	0.390556	0.406926	0.081109	0.288608	4.1559	1.08882	0.47357	0.91211	1.70028	0.648549	1	0.36385	unclassified Clostridiales_msp_0588	unclassified Clostridiales	unclassified Clostridiales	Clostridiales	Clostridia	Firmicutes	Bacteria
msp_0589c	0.000614035	0.00050535	0.22434	2	0	7.22868e-07	0.756162	0	1	NA	NA	NA	NA	NA	NA	NA	NA	NA	NA	48.6231	NA	NA	NA	NA	NA	NA	NA	NA	NA	51.3769	NA	NA	NA	1	0.693351	unclassified_msp_0589c	unclassified	unclassified	unclassified	unclassified	unclassified	unclassified
msp_0590	-0.000129623	0.000174092	0.456534	11	7.02023e-08	1.28153e-07	0.178701	23.2757	1.30337	NA	5.04404	8.36222	1.23193	8.1687	10.1967	15.2552	NA	3.95837	1.97609	NA	NA	NA	NA	NA	NA	NA	NA	29.1226	NA	11.8967	NA	4.78752	NA	1	0.84791	unclassified Parabacteroides_msp_0590	Parabacteroides	Tannerellaceae	Bacteroidales	Bacteroidia	Bacteroidetes	Bacteria
msp_0591	-0.00299204	0.0011143	0.00725008	23	9.64413e-06	7.71307e-06	0.0182521	38.588	1.62835	3.88191	3.82785	1.95017	3.51399	4.98649	8.00463	5.5579	NA	7.02804	5.13534	7.73534	0.716187	0.133486	6.03899	2.73704	3.45377	1.00445	5.11686	8.92778	2.57201	4.32809	2.35379	4.5993	6.39661	1	0.134329	unclassified Clostridiales_msp_0591	unclassified Clostridiales	unclassified Clostridiales	Clostridiales	Clostridia	Firmicutes	Bacteria
msp_0592	-9.50965e-05	0.00112242	0.93248	22	1.2158e-05	7.77357e-06	0.00395575	52.5321	2.10669	5.02565	5.54535	6.15963	2.31874	6.69024	7.51525	5.62534	NA	7.69003	4.86265	6.45394	1.59266	NA	4.99994	2.42187	2.6801	0.657191	4.04437	8.61788	1.38661	3.97488	1.42925	3.89719	6.41123	1	0.98206	unclassified Clostridiales_msp_0592	unclassified Clostridiales	unclassified Clostridiales	Clostridiales	Clostridia	Firmicutes	Bacteria
msp_0593	-0.000131962	0.000115593	0.253616	14	1.03158e-08	5.18092e-08	0.117311	5.13274	1.0541	37.338	18.9525	3.40507	1.73231	NA	1.16914	NA	NA	4.80907	2.24611	1.35062	NA	NA	9.18927	0.407854	0.079903	NA	NA	15.7934	NA	3.51712	0.00962799	NA	NA	1	0.707423	unclassified Muribaculaceae_msp_0593	unclassified Muribaculaceae	Muribaculaceae	Bacteroidales	Bacteroidia	Bacteroidetes	Bacteria
msp_0594	-0.0014599	0.000863565	0.0909227	22	0	3.82774e-06	0.33695	0	1	4.8093	2.56334	4.78368	0.848521	2.28424	6.58416	14.3448	NA	9.75707	5.46563	3.62966	0.2113	NA	2.13356	3.39593	1.1653	0.315244	2.36997	19.0924	2.40905	7.19207	0.3537	1.26104	5.03005	1	0.497417	Phascolarctobacterium sp. CAG:266_msp_0594	Phascolarctobacterium	Acidaminococcaceae	Acidaminococcales	Negativicutes	Firmicutes	Bacteria
msp_0595	-0.000201592	0.000430124	0.639297	22	1.03083e-06	1.02916e-06	0.022153	31.5984	1.46195	4.767	3.77101	3.25647	0.675356	3.28069	8.66324	1.80597	NA	4.48065	8.69719	10.1033	0.175261	NA	2.00486	3.74822	3.07549	0.686966	1.33505	7.43086	1.43792	4.42539	3.16044	9.09022	13.9284	1	0.926509	Cryptobacterium sp. CAG:338_msp_0595	Cryptobacterium	Eggerthellaceae	Eggerthellales	Coriobacteriia	Actinobacteria	Bacteria
msp_0596	-0.00189949	0.00125471	0.130054	22	1.12029e-05	9.25317e-06	0.0097626	40.5515	1.68213	4.78113	6.29238	6.87494	2.34699	5.22606	9.56806	5.88641	NA	9.39782	4.35676	6.91182	1.49891	NA	4.44036	2.08923	2.01953	0.327306	2.544	11.5463	1.38099	3.55802	1.77156	3.3554	3.82605	1	0.568938	unclassified Firmicutes_msp_0596	unclassified Firmicutes	unclassified Firmicutes	unclassified Firmicutes	unclassified Firmicutes	Firmicutes	Bacteria
msp_0597	-0.000245603	0.000404572	0.543805	21	1.59329e-06	9.8243e-07	0.00685824	63.6818	2.75344	8.3229	2.62212	4.11564	0.839892	4.46596	5.24396	2.41175	NA	5.17056	2.69741	6.25735	4.95797	NA	4.16863	2.61183	2.46043	5.86972	9.55217	7.81376	NA	6.74639	2.39302	1.99584	9.28271	1	0.891291	unclassified Clostridiales_msp_0597	unclassified Clostridiales	unclassified Clostridiales	Clostridiales	Clostridia	Firmicutes	Bacteria
msp_0598	0.000213937	0.000401112	0.593784	16	4.14085e-07	6.94054e-07	0.288123	19.4875	1.24204	7.44941	8.2116	NA	0.428324	17.606	NA	8.41817	NA	28.6801	2.68615	8.34032	NA	NA	6.31545	0.602617	2.1348	0.0979959	1.98731	5.84675	0.229571	NA	NA	NA	0.965487	1	0.90873	Prevotella sp. CAG:1092_msp_0598	Prevotella	Prevotellaceae	Bacteroidales	Bacteroidia	Bacteroidetes	Bacteria
msp_0599	0.000195229	0.000269488	0.468793	13	0	3.22017e-07	0.746158	0	1	7.0085	NA	4.65955	17.4068	NA	NA	NA	NA	22.389	5.26726	9.22258	NA	NA	NA	6.36233	4.96406	0.99437	NA	7.522	NA	1.01697	NA	0.651211	12.5354	1	0.852413	unclassified Prevotella_msp_0599	Prevotella	Prevotellaceae	Bacteroidales	Bacteroidia	Bacteroidetes	Bacteria
msp_0600c	0.000158354	9.69548e-05	0.102411	19	6.71342e-08	5.15103e-08	0.0582853	48.7832	1.95248	3.67061	3.58958	2.37349	1.57738	3.00091	1.30502	0.804594	NA	3.53042	4.35998	11.9226	NA	NA	7.11313	6.28286	6.23201	NA	5.8482	10.5813	NA	8.98673	0.728526	8.96426	9.12838	1	0.519406	Weissella cibaria_msp_0600c	Weissella	Leuconostocaceae	Lactobacillales	Bacilli	Firmicutes	Bacteria
msp_0601c	9.94125e-05	5.51122e-05	0.0712597	16	2.68791e-09	1.13539e-08	0.562509	5.07341	1.05345	0.689817	1.69587	0.645802	1.48698	1.1782	26.4098	4.6571	NA	4.68466	NA	42.6513	NA	NA	1.26443	NA	NA	NA	2.25332	8.94392	NA	0.245609	0.0952076	0.337911	2.76004	1	0.449806	Anaerofustis stercorihominis_msp_0601c	Anaerofustis	Eubacteriaceae	Clostridiales	Clostridia	Firmicutes	Bacteria
msp_0602c	0.00117898	0.00049576	0.017401	22	3.47959e-06	1.60281e-06	2.96147e-07	80.6516	5.16839	4.3198	4.14513	3.27602	5.10235	4.89123	5.04198	5.87407	NA	6.23078	NA	6.95152	3.11104	0.945696	4.76233	3.88784	5.50474	3.06293	4.35417	5.53135	3.64686	5.16963	2.3383	5.21008	6.64218	1	0.22531	Streptococcus infantis_msp_0602c	Streptococcus	Streptococcaceae	Lactobacillales	Bacilli	Firmicutes	Bacteria
msp_0603c	3.54737e-06	5.40447e-05	0.947666	3	3.06472e-09	1.09341e-08	0.253258	25.175	1.33645	NA	NA	NA	NA	NA	NA	NA	NA	NA	NA	NA	NA	NA	25.2505	NA	1.08966	NA	NA	73.6599	NA	NA	NA	NA	NA	1	0.985644	Selenomonas artemidis_msp_0603c	Selenomonas	Selenomonadaceae	Selenomonadales	Negativicutes	Firmicutes	Bacteria
msp_0604	0.000255185	0.00086452	0.76786	22	9.5683e-06	4.77041e-06	0.000110603	72.7964	3.67599	3.75201	4.26554	5.61499	4.22464	6.25637	6.28072	4.98299	NA	6.6141	7.43085	6.07177	1.62616	NA	4.84942	2.76305	3.4899	1.15263	4.34654	7.03153	1.7779	4.19087	2.44854	4.72418	6.10531	1	0.960102	Dorea sp. CAG:105_msp_0604	Dorea	Lachnospiraceae	Clostridiales	Clostridia	Firmicutes	Bacteria
msp_0605	-0.000336017	0.000374833	0.370015	22	6.88317e-07	6.86219e-07	0.468499	33.1555	1.49601	3.15763	4.95176	13.1469	0.417941	16.6307	11.6533	1.86926	NA	7.70828	1.39041	1.52364	6.02838	NA	1.5393	0.398947	0.312388	0.0892818	1.40023	14.6457	1.62334	0.610597	1.71606	3.40244	5.78354	1	0.781934	unclassified Firmicutes_msp_0605	unclassified Firmicutes	unclassified Firmicutes	unclassified Firmicutes	unclassified Firmicutes	Firmicutes	Bacteria
msp_0606	-0.000265471	0.000590807	0.653189	6	6.49734e-07	1.21139e-06	0.147824	34.7479	1.53252	NA	NA	NA	NA	NA	NA	35.5299	NA	NA	13.51	31.0687	NA	NA	2.71696	6.41454	NA	NA	NA	NA	NA	10.76	NA	NA	NA	1	0.9275	unclassified Ruminococcus_msp_0606	Ruminococcus	Ruminococcaceae	Clostridiales	Clostridia	Firmicutes	Bacteria
msp_0607	3.68117e-05	0.000238024	0.877093	9	2.51508e-07	2.33957e-07	0.08446	69.7157	3.30205	NA	NA	NA	1.02746	7.78898	NA	21.1189	NA	NA	NA	9.43654	NA	NA	11.122	NA	6.93418	NA	8.10831	14.1333	NA	NA	NA	NA	20.3304	1	0.977649	unclassified Paraprevotella_msp_0607	Paraprevotella	Prevotellaceae	Bacteroidales	Bacteroidia	Bacteroidetes	Bacteria
msp_0608	-0.000349732	0.000453205	0.4403	14	0	7.6671e-07	0.816932	0	1	0.521637	27.584	NA	NA	NA	NA	NA	NA	NA	22.5185	2.57591	NA	NA	3.66789	0.315537	0.615521	0.0629271	0.552262	10.3044	NA	0.747627	1.5777	5.61391	23.3422	1	0.831215	Bacteroidales bacterium H4 _msp_0608	Prevotella	Prevotellaceae	Bacteroidales	Bacteroidia	Bacteroidetes	Bacteria
msp_0609	0.000690898	0.00396747	0.861755	3	1.93137e-05	5.13784e-05	0.222099	37.8296	1.60848	NA	NA	NA	NA	NA	NA	NA	NA	NA	NA	55.8063	NA	NA	NA	NA	17.5641	NA	NA	NA	26.6296	NA	NA	NA	NA	1	0.975143	unclassified Bacteroides_msp_0609	Bacteroides	Bacteroidaceae	Bacteroidales	Bacteroidia	Bacteroidetes	Bacteria
msp_0610	0.00283377	0.000692931	4.32223e-05	20	6.96674e-06	2.94344e-06	5.51166e-17	96.2256	26.4946	5.97976	4.63439	1.82378	6.45135	4.80052	4.68006	6.78182	NA	6.2795	NA	6.85473	1.44099	NA	5.78911	6.36259	4.22751	0.460106	4.53557	6.2281	4.0301	6.84014	NA	4.94766	6.8522	0.0854937	0.00569958	Fusobacterium nucleatum subsp. animalis_msp_0610	Fusobacterium	Fusobacteriaceae	Fusobacteriales	Fusobacteriia	Fusobacteria	Bacteria
msp_0611	-5.29635e-05	0.000806744	0.947656	19	6.17636e-06	3.61345e-06	0.356618	73.4135	3.7613	8.80492	3.50673	NA	2.23853	6.08369	6.60012	6.42978	NA	7.22076	9.48449	10.0067	NA	NA	7.72946	0.815731	2.07455	1.66852	5.24142	9.82006	NA	6.08028	0.72681	4.78266	0.684828	1	0.985644	Bacteroidales bacterium H2 _msp_0611	Prevotella	Prevotellaceae	Bacteroidales	Bacteroidia	Bacteroidetes	Bacteria
msp_0612	0.000245104	0.000502259	0.625548	21	8.37344e-07	1.26586e-06	0.624849	18.1342	1.22151	5.69667	4.79586	6.36884	NA	12.3134	7.72472	2.81174	NA	9.98169	5.05047	4.69334	0.125368	NA	1.5031	0.540074	0.612977	0.0707436	5.7638	16.1958	12.474	1.40429	0.536765	1.1224	0.213958	1	0.924764	unclassified Firmicutes_msp_0612	unclassified Firmicutes	unclassified Firmicutes	unclassified Firmicutes	unclassified Firmicutes	Firmicutes	Bacteria
msp_0613	0.00098856	0.000493368	0.0451025	21	1.82091e-06	1.2976e-06	0.00316083	58.4805	2.40851	5.00869	3.95864	NA	3.43156	10.6808	12.4062	9.9146	NA	11.8416	9.44712	4.92131	0.468757	NA	3.35205	1.36662	1.62668	0.278213	2.13202	8.67467	1.30792	2.11009	0.726885	2.96419	3.38131	1	0.371244	unclassified Clostridiales_msp_0613	unclassified Clostridiales	unclassified Clostridiales	Clostridiales	Clostridia	Firmicutes	Bacteria
msp_0614	-3.50995e-05	0.000148588	0.813262	11	3.32227e-08	8.29675e-08	0.328817	14.3602	1.16768	NA	2.12325	NA	NA	NA	22.5902	NA	NA	2.52219	5.49944	10.1489	NA	NA	4.52146	0.0355827	1.18028	NA	NA	40.1086	NA	11.2238	NA	NA	0.0462557	1	0.963879	unclassified Muribaculaceae_msp_0614	unclassified Muribaculaceae	Muribaculaceae	Bacteroidales	Bacteroidia	Bacteroidetes	Bacteria
msp_0615	-0.000124745	0.000580183	0.82976	22	0	1.48789e-06	0.400523	0	1	3.0935	1.71749	4.7652	0.729026	4.8786	4.78181	2.44889	NA	5.74352	1.55594	3.79802	0.86052	NA	3.27909	0.79967	0.888766	0.444175	2.72775	23.2173	2.0243	2.0058	0.222026	1.55069	28.468	1	0.969091	unclassified Clostridiales_msp_0615	unclassified Clostridiales	unclassified Clostridiales	Clostridiales	Clostridia	Firmicutes	Bacteria
msp_0616	0.00101987	0.000752767	0.175472	12	4.40179e-06	2.70616e-06	0.0458358	95.5233	22.338	NA	NA	5.27569	NA	6.48869	1.2423	12.8465	NA	9.29095	NA	12.7367	NA	NA	12.413	NA	11.6989	NA	7.79903	10.1205	NA	NA	3.84123	6.24644	NA	1	0.639832	Prevotella buccae_msp_0616	Prevotella	Prevotellaceae	Bacteroidales	Bacteroidia	Bacteroidetes	Bacteria
msp_0617	0.000316163	0.000217774	0.146559	13	0	1.76732e-07	0.743643	0	1	3.02138	52.2687	NA	NA	NA	NA	5.32478	NA	NA	NA	4.09426	NA	NA	2.70436	0.366821	0.34809	0.15391	2.26146	25.096	NA	2.56122	NA	0.845832	0.953182	1	0.598079	unclassified Burkholderiales_msp_0617	unclassified Burkholderiales	unclassified Burkholderiales	Burkholderiales	Betaproteobacteria	Proteobacteria	Bacteria
msp_0618	7.69024e-05	0.000169481	0.650008	16	3.42599e-08	1.26625e-07	0.349906	7.43976	1.08038	NA	2.79328	5.05893	0.715412	6.50177	6.77384	8.12349	NA	3.37105	16.7604	29.4867	NA	NA	1.68838	0.791307	2.48033	NA	5.64159	8.4801	NA	NA	NA	0.456543	0.876902	1	0.9275	Turicimonas muris_msp_0618	Turicimonas	Sutterellaceae	Burkholderiales	Betaproteobacteria	Proteobacteria	Bacteria
msp_0619	-9.80717e-05	0.000419935	0.815342	22	1.7081e-06	1.05414e-06	0.00142031	63.8419	2.76563	5.90696	4.198	8.98166	1.55591	3.91515	8.06622	4.76931	NA	6.97217	9.7355	5.59107	1.52853	NA	4.65577	2.0454	2.88461	1.00146	2.89299	9.03009	5.91843	3.04076	0.466207	2.69916	4.14464	1	0.963879	unclassified_msp_0619	unclassified	unclassified	unclassified	unclassified	unclassified	unclassified
msp_0620	-0.000263532	0.00035455	0.457308	12	6.18637e-07	5.61703e-07	0.0135103	59.1846	2.45006	12.136	NA	NA	NA	NA	NA	18.8979	NA	NA	NA	9.32729	NA	NA	7.33466	2.09	1.44811	5.882	5.63666	17.2572	NA	9.99966	NA	0.957662	9.03286	1	0.848551	unclassified_msp_0620	unclassified	unclassified	unclassified	unclassified	unclassified	unclassified
msp_0621	-0.000703928	0.00112668	0.532115	23	1.59569e-05	8.22393e-06	0.432262	68.5181	3.17642	4.48383	4.75127	2.74645	3.52112	4.23891	5.70943	5.12183	NA	6.17248	7.58077	6.53663	2.02019	0.532602	5.60166	4.5509	4.02487	1.3952	4.78144	6.88056	1.93511	4.65595	2.61731	4.70923	5.43227	1	0.890207	Intestinibacter bartlettii_msp_0621	Intestinibacter	Peptostreptococcaceae	Clostridiales	Clostridia	Firmicutes	Bacteria
msp_0622	-0.00184128	0.000771589	0.0170166	23	4.82538e-06	3.62681e-06	0.00557343	43.216	1.76106	4.52195	5.48108	5.26279	2.50818	5.4041	9.07736	5.29875	NA	8.29523	5.13952	7.21282	0.536084	0.706432	5.19102	2.88027	2.24193	0.70265	3.76406	9.87681	1.7965	3.76515	1.39094	3.90428	5.04208	1	0.224392	unclassified Firmicutes_msp_0622	unclassified Firmicutes	unclassified Firmicutes	unclassified Firmicutes	unclassified Firmicutes	Firmicutes	Bacteria
msp_0623	-0.00127364	0.000623368	0.0410366	22	7.54417e-07	1.79195e-06	0.167831	9.57651	1.10591	1.13056	4.12141	3.80759	1.92455	3.21681	15.3999	2.8253	NA	8.86918	19.7073	4.05791	0.405494	NA	1.94024	1.07854	0.724013	0.24513	1.89933	19.497	0.928406	1.37943	0.219884	1.81851	4.80344	1	0.360758	Coprobacillus sp. 8_1_38FAA _msp_0623	Coprobacillus	Erysipelotrichaceae	Erysipelotrichales	Erysipelotrichia	Firmicutes	Bacteria
msp_0624	-0.000454385	0.000634745	0.474081	22	4.15387e-06	2.43372e-06	9.09958e-05	66.0632	2.94665	4.91718	4.83966	8.7943	2.5952	7.43324	8.05054	4.33836	NA	7.81659	3.8859	5.12989	0.711061	NA	4.24242	1.97619	2.29233	1.15166	4.2829	9.0078	2.77667	3.3219	1.00065	3.72649	7.70907	1	0.852413	unclassified Clostridiales_msp_0624	unclassified Clostridiales	unclassified Clostridiales	Clostridiales	Clostridia	Firmicutes	Bacteria
msp_0625	0.000140881	0.00011587	0.224041	17	3.34265e-09	5.41141e-08	0.495948	1.33245	1.0135	2.02143	24.3782	0.520449	0.753309	2.84825	23.3402	17.5344	NA	1.60798	NA	5.5582	0.0678866	0.0105007	4.80274	1.57057	NA	NA	NA	3.77156	NA	10.5093	NA	0.156518	0.548443	1	0.693351	Firmicutes bacterium CAG:646_msp_0625	unclassified Firmicutes	unclassified Firmicutes	unclassified Firmicutes	unclassified Firmicutes	Firmicutes	Bacteria
msp_0626	-0.000120432	0.00028518	0.672805	21	1.07827e-07	4.02927e-07	0.172156	6.35534	1.06787	5.98141	1.57289	0.447813	1.2699	1.64092	2.82087	1.16671	NA	3.61114	1.97373	26.5774	5.67842	NA	4.37358	NA	9.32226	1.76416	4.48141	6.21016	0.979304	2.48476	1.581	5.77616	10.286	1	0.930503	Citrobacter freundii_msp_0626	Citrobacter	Enterobacteriaceae	Enterobacterales	Gammaproteobacteria	Proteobacteria	Bacteria
msp_0627	-0.000123925	0.000783906	0.874389	18	5.50215e-06	3.26009e-06	0.031914	77.315	4.40821	1.69961	4.64523	0.810669	5.96017	1.3418	10.3568	10.7919	NA	4.98465	10.3475	NA	NA	0.0265342	8.64931	NA	5.23044	NA	6.82509	3.05302	0.411765	9.68596	NA	7.09668	8.08293	1	0.977649	Bifidobacterium breve_msp_0627	Bifidobacterium	Bifidobacteriaceae	Bifidobacteriales	Actinobacteria	Actinobacteria	Bacteria
msp_0628	-8.86334e-05	0.000180111	0.622645	16	0	1.46808e-07	0.650005	0	1	2.88912	5.07512	NA	3.14392	4.57687	2.33505	NA	NA	9.07445	1.44835	4.66219	NA	NA	6.71145	0.836216	2.65347	0.603916	5.03203	46.9886	NA	2.90838	NA	1.06087	NA	1	0.921641	unclassified Bacteroidales_msp_0628	unclassified Bacteroidales	unclassified Bacteroidales	Bacteroidales	Bacteroidia	Bacteroidetes	Bacteria
msp_0629	-0.000286212	0.000354644	0.419644	21	1.29727e-06	7.55492e-07	0.00674418	72.9343	3.69472	3.91495	4.68525	NA	2.88295	7.35454	9.54327	6.04546	NA	8.26865	7.50812	5.99316	1.94586	NA	5.24586	1.12188	2.44946	1.32532	3.99331	8.75784	3.15846	2.54689	3.6629	3.27315	6.32271	1	0.819484	unclassified_msp_0629	unclassified	unclassified	unclassified	unclassified	unclassified	unclassified
msp_0630	-0.000823315	0.000440544	0.0616424	22	8.09253e-07	9.8582e-07	0.270004	25.1332	1.33571	2.23749	3.34204	2.60505	1.59192	5.20186	19.3555	6.08005	NA	8.80633	10.9436	5.36958	0.533631	NA	3.15228	1.29371	1.73564	0.2087	2.28926	13.6491	0.812767	1.82364	0.895922	2.39472	5.67716	1	0.429326	Eubacterium sp. CAG:161_msp_0630	Eubacterium	Eubacteriaceae	Clostridiales	Clostridia	Firmicutes	Bacteria
msp_0631	0.000418408	0.000215531	0.0522235	18	6.11147e-08	1.97448e-07	0.156529	6.88338	1.07392	2.09939	0.802449	NA	NA	10.6522	NA	47.1701	NA	NA	NA	5.66277	2.53555	0.0451607	9.20769	0.305737	1.24609	0.0463628	0.434399	3.16233	10.5138	1.45435	2.01147	1.22879	1.42141	1	0.395778	unclassified Firmicutes_msp_0631	unclassified Firmicutes	unclassified Firmicutes	unclassified Firmicutes	unclassified Firmicutes	Firmicutes	Bacteria
msp_0632	0.000203254	0.000130835	0.120298	19	3.88354e-08	6.21989e-08	0.291387	17.7004	1.21507	0.312691	NA	NA	NA	12.8341	35.8164	2.37852	NA	26.5167	12.6021	1.75286	0.0517923	NA	0.455942	0.209814	0.395753	0.0301655	0.205774	4.80408	0.128873	0.332626	0.058828	0.321104	0.79191	1	0.555484	unclassified Clostridiales_msp_0632	unclassified Clostridiales	unclassified Clostridiales	Clostridiales	Clostridia	Firmicutes	Bacteria
msp_0633	0.00019189	0.000177635	0.280033	18	7.45372e-08	1.32553e-07	0.181427	16.0588	1.19131	0.597043	1.39285	0.780752	NA	1.37697	4.61271	0.732565	NA	6.38773	8.23316	24.7978	NA	NA	1.06616	NA	2.32063	NA	1.16665	1.89688	1.23011	11.2458	0.613807	25.2416	6.30672	1	0.721971	Klebsiella michiganensis 1_msp_0633	Klebsiella	Enterobacteriaceae	Enterobacterales	Gammaproteobacteria	Proteobacteria	Bacteria
msp_0634	0.000266996	0.000304468	0.380528	19	4.38408e-07	4.15578e-07	0.155551	38.4535	1.62479	1.5252	16.8819	15.0931	NA	9.55686	9.49705	11.4853	NA	16.0828	NA	4.14976	NA	NA	1.15029	1.00865	0.509034	0.136284	1.92228	8.33263	0.44627	0.928388	0.262637	0.469265	0.562455	1	0.791268	unclassified Flavonifractor_msp_0634	Flavonifractor	unclassified Clostridiales	Clostridiales	Clostridia	Firmicutes	Bacteria
msp_0635	0.00016781	0.000275024	0.541751	22	5.50163e-07	4.47373e-07	0.0344711	42.1205	1.72773	11.3497	4.08108	9.09465	1.31041	3.4322	5.32784	4.50927	NA	4.82782	2.60107	6.57736	1.17602	NA	2.64648	5.29416	5.63784	1.66954	4.35514	10.6359	4.84494	3.69149	1.015	1.00773	4.91443	1	0.891291	unclassified_msp_0635	unclassified	unclassified	unclassified	unclassified	unclassified	unclassified
msp_0636	-0.000370051	0.000254502	0.145942	21	1.98831e-07	2.9153e-07	0.793378	19.3143	1.23938	6.27911	20.396	1.50681	0.497308	2.29273	7.87737	5.82183	NA	5.84118	0.931566	1.68978	0.609269	NA	0.594057	0.71066	0.551572	NA	1.05395	10.8802	0.728951	5.71428	2.064	0.853995	23.1054	1	0.598079	Bacteroidales bacterium 55_9_msp_0636	unclassified Bacteroidales	unclassified Bacteroidales	Bacteroidales	Bacteroidia	Bacteroidetes	Bacteria
msp_0637	-0.000112183	0.000123635	0.364208	19	0	6.78987e-08	0.678234	0	1	28.2207	0.917854	1.17829	0.234807	1.02981	4.19015	1.30168	NA	1.46344	1.0678	5.83597	NA	NA	4.13832	4.41694	3.7065	0.451315	NA	16.5286	NA	4.68122	0.913994	7.03186	12.6907	1	0.781434	Alistipes sp. Marseille-P2431_msp_0637	Alistipes	Rikenellaceae	Bacteroidales	Bacteroidia	Bacteroidetes	Bacteria
msp_0638	0.000132834	7.37897e-05	0.0718334	18	0	1.95088e-08	0.370739	0	1	0.386924	1.6429	NA	NA	14.1096	NA	3.05927	NA	46.3442	NA	1.8961	0.176838	NA	0.509235	0.247806	0.316886	0.0101237	0.436096	25.2613	0.0433057	0.3046	0.11909	1.23565	3.90002	1	0.449806	unclassified Gordonibacter_msp_0638	Gordonibacter	Eggerthellaceae	Eggerthellales	Coriobacteriia	Actinobacteria	Bacteria
msp_0639	-0.00137274	0.00100087	0.170205	23	5.99017e-06	5.36873e-06	0.409557	34.7872	1.53344	3.88522	10.2513	8.30127	4.54846	10.8756	9.90938	4.89392	NA	12.0637	5.07208	4.0332	0.65103	0.0899859	2.32425	1.48551	1.47203	0.284783	2.0923	11.0497	0.778888	2.20097	0.878361	1.87318	0.984911	1	0.635566	Faecalibacterium prausnitzii 6_msp_0639	Faecalibacterium	Ruminococcaceae	Clostridiales	Clostridia	Firmicutes	Bacteria
msp_0640	-2.34808e-05	8.67104e-05	0.786548	19	6.86232e-09	3.1708e-08	0.45957	4.69641	1.04928	7.38103	1.96339	NA	4.00969	15.2844	27.6929	13.5648	NA	9.33743	NA	1.6167	0.124006	NA	0.822718	0.116939	0.26699	0.0433114	0.397075	11.9953	NA	0.494804	0.383936	2.95786	1.5468	1	0.960102	unclassified Oscillibacter_msp_0640	Oscillibacter	Oscillospiraceae	Clostridiales	Clostridia	Firmicutes	Bacteria
msp_0641	6.06428e-05	5.26682e-05	0.249562	20	0	9.99749e-09	0.891798	0	1	2.09731	NA	NA	2.41997	12.4861	33.3653	29.526	NA	13.2967	0.656794	0.621611	0.144129	NA	0.423581	0.261255	0.141022	0.0433574	0.213582	2.84179	0.122688	0.41261	0.0808937	0.362834	0.482431	1	0.707423	unclassified Clostridiales_msp_0641	unclassified Clostridiales	unclassified Clostridiales	Clostridiales	Clostridia	Firmicutes	Bacteria
msp_0642	-0.000363579	0.000404642	0.368908	18	4.31347e-07	6.83313e-07	0.291794	18.0701	1.22056	3.70054	NA	19.7079	NA	NA	NA	12.534	NA	22.3379	7.1479	2.38151	NA	0.0853228	1.68591	7.74007	0.504114	0.0144161	0.664877	16.3671	0.703748	3.19413	0.145524	0.44365	0.641411	1	0.781539	Proteobacteria bacterium CAG:495_msp_0642	unclassified Proteobacteria	unclassified Proteobacteria	unclassified Proteobacteria	unclassified Proteobacteria	Proteobacteria	Bacteria
msp_0643	-0.000479583	0.000216442	0.0267082	22	0	1.99781e-07	0.227745	0	1	2.97198	3.39783	2.92377	0.857682	5.44231	4.43486	1.30324	NA	5.16045	1.74642	3.01217	1.33375	NA	1.77406	0.783185	0.91729	0.178211	2.89991	23.2562	0.789694	2.86753	0.471692	0.763817	32.7139	1	0.300164	unclassified Clostridiales_msp_0643	unclassified Clostridiales	unclassified Clostridiales	Clostridiales	Clostridia	Firmicutes	Bacteria
msp_0644	-3.77884e-05	0.000114448	0.741265	19	0	5.36814e-08	0.731354	0	1	5.3362	4.98105	3.67143	0.204366	3.24922	4.67103	0.991048	NA	23.319	1.61535	1.4767	NA	NA	1.18395	1.89375	0.739852	NA	3.63604	36.8481	NA	2.29206	0.210087	0.664678	3.01608	1	0.950857	unclassified_msp_0644	unclassified	unclassified	unclassified	unclassified	unclassified	unclassified
msp_0645	-0.000388884	0.00123173	0.752215	19	1.38016e-05	8.44139e-06	0.000735857	67.6237	3.08868	3.84504	9.49029	NA	3.734	9.20256	10.141	4.83862	NA	7.50139	9.15818	4.50233	0.530474	NA	3.76304	1.4171	2.74097	NA	5.22348	9.17369	0.710523	2.73654	NA	3.00256	8.28824	1	0.954599	Clostridium sp. CAG:452_msp_0645	unclassified Clostridiales	unclassified Clostridiales	Clostridiales	Clostridia	Firmicutes	Bacteria
msp_0646	0.000274117	0.000206672	0.184729	16	8.19214e-08	1.78975e-07	0.355896	13.3147	1.1536	8.81001	6.8093	NA	0.218512	2.65435	1.30612	NA	NA	21.5489	8.22859	10.1506	NA	NA	2.00717	2.36575	2.24204	NA	1.87564	28.332	NA	NA	0.413523	1.61724	1.42028	1	0.650535	Bacteroides sp. 43_108_msp_0646	Bacteroides	Bacteroidaceae	Bacteroidales	Bacteroidia	Bacteroidetes	Bacteria
msp_0647	0.000958868	0.000317813	0.00255219	23	6.52183e-07	5.49043e-07	0.0313277	45.7856	1.84453	2.80899	2.66064	9.99796	4.61791	6.12679	15.0316	9.80525	NA	9.7916	9.26126	4.315	0.774705	0.365654	2.7758	1.20897	2.56642	0.313115	2.70077	6.23717	1.76833	1.62692	2.00933	1.61544	1.62033	1	0.0753467	Clostridia bacterium UC5.1-2E3_msp_0647	unclassified Clostridia	unclassified Clostridia	unclassified Clostridia	Clostridia	Firmicutes	Bacteria
msp_0648	-0.00120941	0.00127302	0.342094	22	1.01512e-05	9.79952e-06	0.0444667	31.801	1.4663	3.41655	4.71306	3.90884	2.14805	5.68898	8.88235	3.73184	NA	8.79141	7.60635	6.21872	4.57611	NA	4.57044	1.82977	1.54489	1.02542	5.65044	9.34633	1.19222	4.10146	1.35585	3.14317	6.55775	1	0.778259	Holdemanella biformis_msp_0648	Holdemanella	Erysipelotrichaceae	Erysipelotrichales	Erysipelotrichia	Firmicutes	Bacteria
msp_0649	0.000218259	0.00027894	0.433945	10	1.56099e-07	2.79467e-07	0.22579	24.228	1.31975	NA	2.60904	0.503973	1.06455	2.46658	4.34693	7.83238	NA	1.37463	21.8297	NA	NA	NA	34.4058	NA	NA	NA	NA	23.5664	NA	NA	NA	NA	NA	1	0.82533	unclassified Acidaminococcus_msp_0649	Acidaminococcus	Acidaminococcaceae	Acidaminococcales	Negativicutes	Firmicutes	Bacteria
msp_0650	-0.00417683	0.00147145	0.00453132	22	2.82379e-05	1.3968e-05	5.62435e-07	69.1397	3.24041	5.26837	5.13264	5.08902	2.83748	5.78514	6.09775	5.38612	NA	6.27456	4.32071	6.10838	1.995	NA	5.29547	3.47539	3.56535	1.18668	5.17989	7.07869	2.85414	4.65226	1.56059	4.96802	5.88836	1	0.102325	unclassified Butyricicoccus_msp_0650	Butyricicoccus	Clostridiaceae	Clostridiales	Clostridia	Firmicutes	Bacteria
msp_0651	0.000317604	0.000314174	0.312056	12	1.16277e-07	3.65197e-07	0.285273	9.96587	1.11069	2.61602	NA	0.572631	0.326732	11.2143	NA	5.55185	NA	28.4094	2.64544	19.8017	NA	NA	NA	25.6015	NA	NA	0.741743	2.11506	NA	NA	NA	NA	0.403541	1	0.750567	unclassified Prevotella_msp_0651	Prevotella	Prevotellaceae	Bacteroidales	Bacteroidia	Bacteroidetes	Bacteria
msp_0652	-0.000615608	0.000556085	0.268278	22	2.2473e-06	1.73754e-06	0.00706947	51.0423	2.04258	4.19556	4.60805	12.9581	2.09771	6.58918	9.4626	4.45379	NA	9.39498	4.85369	4.80492	1.09388	NA	3.27148	1.45679	1.95999	0.652959	4.23266	11.3682	1.41639	2.18177	0.45805	2.74909	5.74016	1	0.719022	unclassified_msp_0652	unclassified	unclassified	unclassified	unclassified	unclassified	unclassified
msp_0653	-0.000124519	0.000135585	0.35842	18	2.18796e-09	7.99656e-08	0.670359	0.614821	1.00619	14.6797	19.2	5.99181	0.267333	4.66788	3.58585	0.443532	NA	16.5726	NA	8.87015	1.54321	NA	0.257988	1.02294	NA	NA	0.842087	16.0717	NA	4.37412	0.128172	1.43681	0.0440575	1	0.781434	unclassified Muribaculaceae_msp_0653	unclassified Muribaculaceae	Muribaculaceae	Bacteroidales	Bacteroidia	Bacteroidetes	Bacteria
msp_0654	-0.000767085	0.00245567	0.754757	22	6.48388e-05	3.78299e-05	0.000161894	59.113	2.44577	5.59906	5.11519	4.61977	2.88911	5.59767	7.3627	5.58249	NA	7.40747	4.30829	7.16789	1.19223	NA	6.30459	1.9514	2.99607	0.837382	4.47916	8.09509	2.23893	4.60914	2.40199	4.94915	4.29523	1	0.954599	Firmicutes bacterium CAG:103_msp_0654	unclassified Firmicutes	unclassified Firmicutes	unclassified Firmicutes	unclassified Firmicutes	Firmicutes	Bacteria
msp_0655	0.000394729	0.000923516	0.669073	23	1.09542e-05	5.53245e-06	7.53229e-05	67.114	3.04081	4.3072	4.55249	2.91479	2.92067	5.64825	6.55784	5.41611	NA	6.1273	6.87666	6.6677	1.57091	0.650781	5.20964	3.57427	4.58535	1.3888	4.55265	6.54698	2.11155	4.98639	3.3286	4.78796	4.7171	1	0.930503	Ruminococcus sp. 2789STDY5608817 _msp_0655	unclassified Clostridiales	unclassified Clostridiales	Clostridiales	Clostridia	Firmicutes	Bacteria
msp_0656	-0.000171175	0.000232415	0.461424	17	0	1.89974e-07	0.590085	0	1	2.19687	0.965407	NA	0.0410209	1.24737	NA	5.92678	NA	0.890045	0.00380631	1.19199	NA	NA	0.198386	0.566718	2.00046	NA	0.123352	4.93309	0.62266	3.15668	NA	33.0355	42.8999	1	0.852191	Succinatimonas sp. CAG:777_msp_0656	Succinatimonas	Succinivibrionaceae	Aeromonadales	Gammaproteobacteria	Proteobacteria	Bacteria
msp_0657	0.000242611	0.000300642	0.41968	17	7.49833e-07	4.77781e-07	0.00515949	80.6609	5.17087	5.53763	4.41775	10.902	NA	8.89612	11.3858	7.88013	NA	11.948	NA	8.92392	5.13844	NA	5.23336	1.76733	1.24721	NA	1.88574	7.55272	NA	3.04804	NA	1.69878	2.53701	1	0.819484	unclassified_msp_0657	unclassified	unclassified	unclassified	unclassified	unclassified	unclassified
msp_0658	0.00103959	0.00144855	0.472957	3	0	6.57797e-06	0.675995	0	1	NA	NA	NA	NA	NA	NA	NA	NA	NA	NA	25.9263	NA	NA	49.8617	NA	NA	NA	24.212	NA	NA	NA	NA	NA	NA	1	0.852413	unclassified Bacteroides_msp_0658	Bacteroides	Bacteroidaceae	Bacteroidales	Bacteroidia	Bacteroidetes	Bacteria
msp_0659	-9.26308e-05	0.000205351	0.651928	15	0	1.94548e-07	0.701255	0	1	3.19496	7.23394	10.1655	5.46792	11.318	NA	24.6798	NA	6.98242	NA	3.17008	NA	NA	2.42593	1.71059	NA	0.179757	2.48541	4.71117	NA	13.1253	NA	3.14931	NA	1	0.9275	Caecibacter massiliensis_msp_0659	Caecibacter	Veillonellaceae	Veillonellales	Negativicutes	Firmicutes	Bacteria
msp_0660	-0.000431997	0.000469486	0.357495	13	5.65781e-07	8.6223e-07	0.333079	29.3441	1.41531	8.95481	NA	NA	NA	NA	NA	NA	NA	NA	NA	4.78294	NA	NA	3.48153	0.985615	1.88578	0.972321	4.69879	27.5848	0.244447	3.3566	6.87355	3.87991	32.2989	1	0.781434	unclassified_msp_0660	unclassified	unclassified	unclassified	unclassified	unclassified	unclassified
msp_0662	-4.71259e-05	0.000203034	0.816454	20	0	1.81355e-07	0.474253	0	1	3.60625	0.233109	0.187925	0.317663	0.488898	29.1643	1.73367	NA	0.740865	8.43724	13.2969	NA	NA	1.2874	1.93419	6.52982	1.23979	0.570123	6.34519	NA	0.723484	4.43658	4.27718	14.4494	1	0.963879	bacterium OL-1_msp_0662	unclassified Bacteria	unclassified Bacteria	unclassified Bacteria	unclassified Bacteria	unclassified Bacteria	Bacteria
msp_0663	8.66498e-05	0.000217436	0.690257	19	2.27322e-07	2.08115e-07	0.0462575	56.5385	2.30089	4.61592	2.15417	NA	NA	19.1181	18.5549	9.09678	NA	18.9058	NA	3.12907	0.381841	NA	3.05378	0.744887	0.580797	0.229271	2.35534	9.07866	2.2184	1.4212	0.166157	2.46589	1.72905	1	0.930503	unclassified_msp_0663	unclassified	unclassified	unclassified	unclassified	unclassified	unclassified
msp_0664	-8.96232e-05	0.000167453	0.592501	9	0	5.89257e-07	0.562009	0	1	NA	0.21424	0.346102	0.144489	0.432598	1.85924	0.329198	NA	1.75339	0.280265	NA	NA	NA	NA	NA	NA	NA	NA	94.6405	NA	NA	NA	NA	NA	1	0.90873	unclassified Clostridiales_msp_0664	unclassified Clostridiales	unclassified Clostridiales	Clostridiales	Clostridia	Firmicutes	Bacteria
msp_0665	-0.000656914	0.000645781	0.309039	22	6.21638e-06	2.6716e-06	0.0169046	88.4429	8.65268	5.26979	5.31828	6.61609	5.82694	6.00625	6.49855	6.03363	NA	6.47929	5.78522	5.29888	1.63335	NA	4.68959	3.11439	3.20767	1.06534	4.00146	6.22394	2.42507	3.91155	1.45672	4.69036	4.44763	1	0.746414	unclassified Clostridiales_msp_0665	unclassified Clostridiales	unclassified Clostridiales	Clostridiales	Clostridia	Firmicutes	Bacteria
msp_0666	3.48082e-05	8.77226e-05	0.691516	18	4.4627e-09	2.83882e-08	0.829037	2.57383	1.02642	0.549077	NA	NA	NA	6.17932	50.9395	2.8442	NA	21.0925	NA	0.603371	0.0848597	NA	0.395868	0.217691	0.251278	0.0522467	0.331013	13.8511	0.067189	0.439754	0.0355178	0.377664	1.6879	1	0.930503	unclassified Coriobacteriia_msp_0666	unclassified Coriobacteriia	unclassified Coriobacteriia	unclassified Coriobacteriia	Coriobacteriia	Actinobacteria	Bacteria
msp_0667	0.000188834	0.000351349	0.590953	15	7.06827e-07	5.81481e-07	0.499716	52.8739	2.12197	3.07088	8.14788	NA	NA	12.2955	14.5792	9.76306	NA	13.474	0.546388	6.34754	NA	NA	13.6012	0.496222	1.11339	NA	5.1419	4.13278	0.106393	7.18367	NA	NA	NA	1	0.90873	unclassified Prevotellaceae_msp_0667	unclassified Prevotellaceae	Prevotellaceae	Bacteroidales	Bacteroidia	Bacteroidetes	Bacteria
msp_0668	-0.000447584	0.00035969	0.213367	17	4.78029e-07	5.14353e-07	0.142939	68.3223	3.1568	3.9696	2.93862	17.2012	0.302115	26.1833	4.21759	0.691318	NA	3.9931	0.423168	1.39977	NA	NA	6.21077	1.23857	0.105814	NA	NA	26.203	NA	1.701	0.556387	2.66461	NA	1	0.686243	Coprococcus sp. CAG:782_msp_0668	Coprococcus	Lachnospiraceae	Clostridiales	Clostridia	Firmicutes	Bacteria
msp_0669	-3.78181e-05	5.69109e-05	0.506361	16	0	1.16576e-08	0.721064	0	1	2.19289	1.34429	NA	NA	NA	9.85095	23.4186	NA	34.2833	NA	1.20539	NA	NA	1.42999	0.0802114	0.119112	0.0748513	NA	21.4014	0.410925	0.958049	0.312989	2.16967	0.747366	1	0.882381	unclassified Clostridiales_msp_0669	unclassified Clostridiales	unclassified Clostridiales	Clostridiales	Clostridia	Firmicutes	Bacteria
msp_0670	-2.10217e-05	7.81e-05	0.787804	20	1.43293e-08	2.2041e-08	0.491175	16.6978	1.20045	0.663438	2.38653	NA	NA	16.1984	20.6318	21.4611	NA	31.2025	NA	0.430065	0.198399	0.00980825	0.601419	0.15377	0.210307	0.0185188	0.218354	3.0077	0.0742415	0.192815	0.294465	0.910955	1.13542	1	0.960121	unclassified Oscillibacter_msp_0670	Oscillibacter	Oscillospiraceae	Clostridiales	Clostridia	Firmicutes	Bacteria
msp_0671	7.85081e-05	0.00029658	0.791232	22	1.60947e-07	4.74799e-07	0.363975	8.55988	1.09361	1.53279	2.1231	11.9147	1.57016	6.41428	10.8367	8.12439	NA	13.7464	NA	7.27634	0.892782	0.169249	3.72344	6.78581	3.15118	0.419113	3.98069	5.77604	1.16412	1.51053	0.461116	3.85398	4.57309	1	0.961337	Turicibacter sanguinis 1_msp_0671	Turicibacter	Erysipelotrichaceae	Erysipelotrichales	Erysipelotrichia	Firmicutes	Bacteria
msp_0672	-8.2326e-05	9.46508e-05	0.384417	14	0	3.35296e-08	0.952496	0	1	20.1255	NA	NA	NA	NA	14.8022	3.77793	NA	9.16086	3.65068	1.70024	NA	NA	0.522321	0.387681	0.152759	0.189451	1.61454	43.0383	NA	0.776953	NA	NA	0.100576	1	0.793713	unclassified Verrucomicrobia_msp_0672	unclassified Verrucomicrobia	unclassified Verrucomicrobia	unclassified Verrucomicrobia	unclassified Verrucomicrobia	Verrucomicrobia	Bacteria
msp_0673	-0.000183075	0.000158926	0.249342	18	1.62981e-07	1.19789e-07	0.23214	64.8964	2.84871	14.0575	6.37791	NA	NA	NA	12.1214	NA	NA	11.9235	13.5793	1.73444	1.18105	NA	1.05976	2.44937	0.791758	0.0972001	3.94236	14.3731	0.444162	7.65998	0.70314	2.95461	4.54942	1	0.707423	unclassified Firmicutes_msp_0673	unclassified Firmicutes	unclassified Firmicutes	unclassified Firmicutes	unclassified Firmicutes	Firmicutes	Bacteria
msp_0674	-0.000538176	0.000299532	0.0723795	21	4.46454e-07	4.87424e-07	0.0798488	29.1211	1.41086	1.0072	5.2106	0.951236	1.79328	4.02448	10.3894	9.62109	NA	4.30811	3.78997	11.4529	NA	NA	2.42357	7.2833	3.12237	4.19107	1.34187	14.8498	2.56067	1.50468	4.48891	0.81488	4.8706	1	0.449806	Eubacterium sp. 2789STDY5834909_msp_0674	Eubacterium	Eubacteriaceae	Clostridiales	Clostridia	Firmicutes	Bacteria
msp_0675	-0.000255715	0.000276621	0.355266	20	0	3.37446e-07	0.489592	0	1	12.9665	0.849451	1.29354	0.236876	0.547594	2.99738	3.14652	NA	3.45972	2.27255	4.03822	0.222703	NA	3.26944	NA	0.7871	NA	1.90909	2.56115	1.48626	7.77075	0.531101	1.56392	48.0901	1	0.781434	Sutterella sp. CAG:521_msp_0675	Sutterella	Sutterellaceae	Burkholderiales	Betaproteobacteria	Proteobacteria	Bacteria
msp_0676	-0.000879536	0.00039913	0.02755	22	1.31024e-06	8.89755e-07	0.00485502	56.9331	2.32197	7.64941	4.76527	11.0417	1.99237	9.17678	8.42178	5.52758	NA	9.16016	2.98081	3.4076	0.854433	NA	3.16748	1.51605	1.28232	1.4818	3.28624	10.7131	0.735209	1.81915	0.321384	2.98361	7.71579	1	0.303318	unclassified_msp_0676	unclassified	unclassified	unclassified	unclassified	unclassified	unclassified
msp_0677c	0.000420163	0.000106599	8.09678e-05	12	1.47118e-09	4.48774e-08	0.278896	0.971008	1.00981	22.014	3.32629	4.80004	NA	NA	12.1245	NA	NA	31.1559	NA	NA	NA	NA	3.34669	NA	1.0982	0.237719	0.598116	7.10151	2.67156	NA	NA	11.5256	NA	0.160154	0.00853073	Slackia exigua_msp_0677c	Slackia	Eggerthellaceae	Eggerthellales	Coriobacteriia	Actinobacteria	Bacteria
msp_0678	0.00016785	0.000157953	0.287936	13	0	1.07744e-07	0.350474	0	1	1.65839	9.28731	NA	NA	NA	NA	NA	NA	61.181	NA	14.4538	1.05947	NA	0.853606	1.31702	3.92333	0.113684	1.36077	NA	0.324996	2.71763	NA	1.74899	NA	1	0.727594	unclassified Clostridiales_msp_0678	unclassified Clostridiales	unclassified Clostridiales	Clostridiales	Clostridia	Firmicutes	Bacteria
msp_0679	-0.000958297	0.000371213	0.00983634	22	7.45141e-07	7.19646e-07	0.0359078	36.4113	1.57261	5.70297	4.61679	16.4087	2.22691	7.83633	10.6589	4.12663	NA	8.14374	5.99392	3.98416	0.600252	NA	3.00901	1.27867	0.975148	0.319585	2.25751	13.5458	0.821416	2.22123	0.391027	1.90004	2.98123	1	0.161288	unclassified_msp_0679	unclassified	unclassified	unclassified	unclassified	unclassified	unclassified
msp_0680c	-5.70958e-05	5.16433e-05	0.268909	5	0	2.05036e-08	0.325037	0	1	NA	NA	NA	NA	NA	NA	NA	NA	NA	NA	0.0168998	NA	NA	10.2427	NA	0.00547152	NA	0.00589527	89.729	NA	NA	NA	NA	NA	1	0.719022	Bacteroidales bacterium H1 _msp_0680c	unclassified Muribaculaceae	Muribaculaceae	Bacteroidales	Bacteroidia	Bacteroidetes	Bacteria
msp_0681	0.000132878	0.000322959	0.680751	15	1.03495e-07	3.81084e-07	0.280665	6.42335	1.06864	6.94726	1.30284	NA	NA	1.74126	2.50182	2.25465	NA	29.7313	0.450154	0.907746	NA	NA	1.10342	0.796072	NA	0.318188	0.910998	34.8306	NA	14.2331	1.97053	NA	NA	1	0.930503	Prevotella sp. CAG:617_msp_0681	Prevotella	Prevotellaceae	Bacteroidales	Bacteroidia	Bacteroidetes	Bacteria
msp_0682	-2.24096e-05	0.000142331	0.874893	15	3.44068e-08	7.56246e-08	0.312339	13.0935	1.15066	0.85021	NA	NA	NA	5.78038	46.0391	NA	NA	25.6527	NA	0.777961	0.452614	NA	4.0243	0.436053	1.50465	0.546515	1.28374	NA	4.61685	0.511197	NA	1.07069	6.45307	1	0.977649	unclassified Firmicutes_msp_0682	unclassified Firmicutes	unclassified Firmicutes	unclassified Firmicutes	unclassified Firmicutes	Firmicutes	Bacteria
msp_0683	-0.000415714	0.000332669	0.211434	14	8.14091e-07	5.60207e-07	0.0140805	81.1471	5.30421	8.75268	NA	6.25803	3.55134	NA	NA	13.3898	NA	12.7875	NA	6.07527	3.99091	NA	7.34078	8.0008	4.41965	NA	12.5246	NA	NA	4.61018	1.95749	6.34105	NA	1	0.683507	unclassified_msp_0683	unclassified	unclassified	unclassified	unclassified	unclassified	unclassified
msp_0684	-0.000214966	0.000777051	0.782054	2	7.57846e-07	2.26625e-06	0.168387	47.2921	1.89725	NA	NA	NA	NA	NA	NA	NA	NA	NA	NA	25.1803	NA	NA	74.8197	NA	NA	NA	NA	NA	NA	NA	NA	NA	NA	1	0.960102	unclassified Muribaculaceae_msp_0684	unclassified Muribaculaceae	Muribaculaceae	Bacteroidales	Bacteroidia	Bacteroidetes	Bacteria
msp_0685	-0.00040189	0.00097344	0.679712	22	5.4923e-06	4.72732e-06	0.097388	42.3218	1.73376	1.08733	1.59168	15.6521	1.80083	7.37337	12.3729	2.76991	NA	8.36118	8.6976	2.35727	0.797143	NA	0.979352	0.755153	0.679541	0.870898	2.06654	12.3399	10.6106	1.38333	0.0514661	1.30249	6.09945	1	0.930503	unclassified Clostridiales_msp_0685	unclassified Clostridiales	unclassified Clostridiales	Clostridiales	Clostridia	Firmicutes	Bacteria
msp_0686	8.75453e-05	0.000120237	0.46655	19	0	5.76276e-08	0.459969	0	1	1.10428	NA	NA	0.692181	4.29534	3.76484	4.97924	NA	1.90592	0.646247	0.408738	0.096999	NA	0.339767	0.277559	0.172153	NA	20.5936	58.5736	0.118763	0.311212	0.022533	0.284178	1.41286	1	0.852379	Ruminococcus sp. CAG:382_msp_0686	Ruminococcus	Ruminococcaceae	Clostridiales	Clostridia	Firmicutes	Bacteria
msp_0687	0.00112643	0.00261897	0.66712	9	4.06569e-05	2.90111e-05	0.295589	84.6747	6.52514	16.0509	NA	NA	NA	6.75144	11.701	NA	NA	NA	NA	11.8982	NA	NA	16.3558	9.74279	NA	0.654646	13.7976	13.0475	NA	NA	NA	NA	NA	1	0.930503	Prevotella sp. UBA630_msp_0687	Prevotella	Prevotellaceae	Bacteroidales	Bacteroidia	Bacteroidetes	Bacteria
msp_0688	-0.000180612	0.000322821	0.575834	15	3.44721e-07	4.52251e-07	0.133887	29.5234	1.41891	8.11405	21.6613	NA	NA	NA	NA	22.3123	NA	NA	NA	8.6432	1.7049	NA	8.40293	2.63245	1.58423	0.656151	10.4506	NA	7.20134	1.7824	0.29112	1.32575	3.23731	1	0.900763	unclassified Lachnospiraceae_msp_0688	unclassified Lachnospiraceae	Lachnospiraceae	Clostridiales	Clostridia	Firmicutes	Bacteria
msp_0689	2.35043e-05	6.83489e-05	0.730931	13	1.05045e-09	1.3885e-08	0.705245	1.1246	1.01137	0.221881	NA	NA	NA	NA	NA	NA	NA	48.6187	NA	NA	0.0385592	NA	1.59282	2.5468	0.283236	0.0122607	0.119487	46.1106	NA	0.359734	0.0118978	0.04376	0.0401734	1	0.947934	unclassified Clostridiales_msp_0689	unclassified Clostridiales	unclassified Clostridiales	Clostridiales	Clostridia	Firmicutes	Bacteria
msp_0690	4.39329e-05	0.000107008	0.681398	16	9.94454e-10	4.17625e-08	0.276842	0.459891	1.00462	0.150646	NA	0.528868	NA	0.83139	23.2923	31.6235	NA	21.8527	NA	3.267	NA	NA	6.166	0.548365	1.91032	0.0352523	0.130651	8.91016	NA	0.513114	NA	0.0483337	0.19135	1	0.930503	unclassified Faecalibacterium_msp_0690	Faecalibacterium	Ruminococcaceae	Clostridiales	Clostridia	Firmicutes	Bacteria
msp_0691	0.000486566	0.000358747	0.175006	14	7.61361e-07	5.83006e-07	0.194832	71.7528	3.54018	1.71634	8.85644	0.403088	NA	1.78204	16.283	15.4053	NA	0.710461	NA	NA	NA	NA	11.81	6.09675	14.7194	1.58699	8.64286	8.76227	NA	3.22508	NA	NA	NA	1	0.639832	Lactobacillus amylovorus_msp_0691	Lactobacillus	Lactobacillaceae	Lactobacillales	Bacilli	Firmicutes	Bacteria
msp_0692	-0.000299713	0.000325653	0.357393	21	3.14951e-07	4.74608e-07	0.0282609	19.5422	1.24289	5.65427	2.76605	4.95252	1.92716	3.52864	9.00882	3.05021	NA	6.71876	2.42443	2.95998	0.818488	NA	2.15942	1.29308	0.848104	0.39349	23.4087	24.2865	0.540052	1.62076	0.385871	1.25469	NA	1	0.781434	unclassified_msp_0692	unclassified	unclassified	unclassified	unclassified	unclassified	unclassified
msp_0693	-0.000865055	0.000467773	0.0644139	21	2.21376e-06	1.33819e-06	0.00161222	63.8399	2.76548	9.52174	2.76267	3.15571	1.52474	4.28672	5.58235	3.7586	NA	4.66732	3.93768	6.45361	NA	NA	7.84077	3.51165	3.4768	1.15584	7.53976	6.31482	4.2985	6.04001	1.52226	5.27125	7.3772	1	0.437735	unclassified Clostridiales_msp_0693	unclassified Clostridiales	unclassified Clostridiales	Clostridiales	Clostridia	Firmicutes	Bacteria
msp_0694	-0.000210313	0.000175826	0.231642	17	0	1.27518e-07	0.395176	0	1	1.05583	5.79915	0.631919	NA	6.60412	NA	1.99802	NA	14.086	0.708093	2.62626	NA	NA	3.53772	0.122578	0.495348	0.024508	2.46672	45.5244	NA	2.19705	NA	0.258735	11.8635	1	0.700934	unclassified Parabacteroides_msp_0694	Parabacteroides	Porphyromonadaceae	Bacteroidales	Bacteroidia	Bacteroidetes	Bacteria
msp_0695	4.14764e-05	0.000308994	0.89322	9	4.40002e-07	3.71304e-07	0.493638	72.4961	3.63585	19.2632	NA	NA	NA	NA	NA	NA	NA	NA	16.3609	5.76367	0.501213	NA	4.35743	NA	NA	NA	16.913	19.6633	NA	NA	NA	16.2088	0.968542	1	0.977649	unclassified Alphaproteobacteria_msp_0695	unclassified Alphaproteobacteria	unclassified Alphaproteobacteria	unclassified Alphaproteobacteria	Alphaproteobacteria	Proteobacteria	Bacteria
msp_0696	0.00022873	0.000142539	0.108565	14	0	8.7115e-08	0.924365	0	1	1.028	NA	NA	NA	5.19865	63.1699	5.95827	NA	16.2913	NA	1.01017	NA	NA	0.211908	0.400629	NA	0.0280021	0.387428	1.28589	NA	0.438287	0.383991	4.20749	NA	1	0.531806	Acidaminococcus fermentans_msp_0696	Acidaminococcus	Acidaminococcaceae	Acidaminococcales	Negativicutes	Firmicutes	Bacteria
msp_0697	-0.000947675	0.000492487	0.0543215	23	2.94661e-06	1.53021e-06	0.00893418	77.2704	4.39956	3.53598	5.53675	4.69578	4.77441	5.89078	6.9751	2.08861	NA	6.67008	8.13221	6.16583	2.09853	0.351913	4.10476	4.00808	3.72432	2.13554	4.18518	7.66809	2.2742	2.67466	0.877138	4.44066	6.99141	1	0.402217	Clostridium sp. CAG:221_msp_0697	unclassified Clostridiales	unclassified Clostridiales	Clostridiales	Clostridia	Firmicutes	Bacteria
msp_0698	0.000410706	0.000311603	0.187489	22	0	4.04636e-07	0.465784	0	1	1.45309	0.856807	1.26983	0.972577	3.27368	21.2717	5.71667	NA	9.90556	34.1793	3.54384	0.187347	NA	0.42338	0.415692	1.10955	0.045593	3.19816	4.51113	1.06798	0.953336	0.387439	0.790392	4.46696	1	0.652418	Faecalitalea cylindroides_msp_0698	Faecalitalea	Erysipelotrichaceae	Erysipelotrichales	Erysipelotrichia	Firmicutes	Bacteria
msp_0699	6.3475e-05	0.000183037	0.728751	20	1.17508e-07	1.45204e-07	0.0702022	25.16	1.33618	2.08304	5.72408	13.0045	8.49867	NA	23.1237	14.2713	NA	NA	16.0413	1.73571	0.11754	NA	0.903303	0.37336	0.5406	0.0614873	0.610566	6.97102	3.33277	0.556989	0.0899477	0.817199	1.14292	1	0.947338	unclassified Firmicutes_msp_0699	unclassified Firmicutes	unclassified Firmicutes	unclassified Firmicutes	unclassified Firmicutes	Firmicutes	Bacteria
msp_0700	0.000511526	0.000269126	0.0573424	10	8.68054e-08	2.58877e-07	0.364079	11.5114	1.13009	NA	1.08763	0.365292	NA	1.60802	50.5143	NA	NA	5.19286	NA	27.3388	NA	NA	3.39109	NA	1.41624	NA	1.31801	7.76774	NA	NA	NA	NA	NA	1	0.410117	Megasphaera sp. ASD88 _msp_0700	Megasphaera	Veillonellaceae	Veillonellales	Negativicutes	Firmicutes	Bacteria
msp_0701	-0.000121591	0.000106419	0.253215	10	0	4.65775e-08	0.936684	0	1	2.52614	NA	NA	NA	NA	60.2973	NA	NA	NA	NA	1.15977	NA	NA	1.82577	0.273246	NA	NA	0.602343	13.1933	NA	1.75586	NA	13.948	4.41828	1	0.707423	unclassified Clostridiales_msp_0701	unclassified Clostridiales	unclassified Clostridiales	Clostridiales	Clostridia	Firmicutes	Bacteria
msp_0702	2.64872e-05	2.87496e-05	0.356891	6	0	1.04923e-08	0.63226	0	1	NA	0.208204	NA	NA	NA	NA	5.77817	NA	NA	NA	0.343666	NA	NA	NA	NA	NA	NA	NA	93.6392	0.00503891	NA	NA	0.0257356	NA	1	0.781434	unclassified Bacteroidales_msp_0702	unclassified Bacteroidales	unclassified Bacteroidales	Bacteroidales	Bacteroidia	Bacteroidetes	Bacteria
msp_0703	-0.000210183	8.55117e-05	0.0139737	21	0	2.81165e-08	0.386503	0	1	0.877214	3.62962	7.30641	0.124914	5.07516	2.27577	0.587417	NA	52.6564	0.751005	0.441771	0.0252262	NA	0.230458	0.209802	0.957256	0.213445	0.831299	22.2243	0.183549	1.05176	0.0831188	0.264102	NA	1	0.201424	unclassified_msp_0703	unclassified	unclassified	unclassified	unclassified	unclassified	unclassified
msp_0704	2.67178e-05	0.000143337	0.852132	13	4.58008e-08	8.10351e-08	0.145009	21.8145	1.27901	4.79574	NA	NA	NA	NA	NA	NA	NA	NA	NA	7.91192	0.495177	NA	5.5509	3.11028	1.06698	0.120825	3.35106	38.2498	NA	7.92069	2.21504	22.5212	2.69039	1	0.972211	unclassified Clostridiales_msp_0704	unclassified Clostridiales	unclassified Clostridiales	Clostridiales	Clostridia	Firmicutes	Bacteria
msp_0705	-0.00101865	0.000456032	0.025501	23	2.05753e-06	1.29773e-06	0.0139836	54.0622	2.17686	6.97583	2.41042	1.18313	1.3326	2.7483	4.04766	2.94901	NA	4.37581	2.10628	4.61258	4.04872	0.734366	8.96072	4.25446	2.62033	2.1503	6.03156	6.39276	3.96624	6.90512	6.4322	7.46137	7.30024	1	0.291567	unclassified Lachnospiraceae_msp_0705	unclassified Lachnospiraceae	Lachnospiraceae	Clostridiales	Clostridia	Firmicutes	Bacteria
msp_0706	9.07332e-05	0.000151539	0.549342	18	3.74929e-08	9.39711e-08	0.191646	9.78089	1.10841	21.5397	0.896786	2.53316	NA	1.58444	35.4052	6.72662	NA	3.90707	NA	4.66366	0.344216	0.0661494	0.720166	1.82486	1.39915	NA	7.07016	8.02407	NA	2.10342	NA	0.440499	0.750657	1	0.891291	unclassified Dorea_msp_0706	Dorea	Lachnospiraceae	Clostridiales	Clostridia	Firmicutes	Bacteria
msp_0707	0.000126913	0.000197058	0.519548	21	9.64013e-08	1.62789e-07	0.046739	15.3896	1.18189	1.82509	2.51334	5.0032	2.38175	6.64749	31.8856	18.5665	NA	13.5139	NA	2.52787	0.260539	NA	1.21075	0.504002	0.641577	0.0777065	0.77664	7.11324	0.370187	0.825973	0.537195	1.05877	1.75869	1	0.889367	unclassified Firmicutes_msp_0707	unclassified Firmicutes	unclassified Firmicutes	unclassified Firmicutes	unclassified Firmicutes	Firmicutes	Bacteria
msp_0708	7.17626e-05	0.000116359	0.537412	13	0	6.22176e-08	0.624107	0	1	1.20277	1.73433	NA	0.170973	NA	8.88749	0.641653	NA	9.96011	7.43936	0.479361	NA	NA	3.05056	0.0682707	NA	NA	NA	64.3887	NA	0.535625	NA	1.44082	NA	1	0.891291	Ruminococcus sp. CAG:563_msp_0708	Ruminococcus	Ruminococcaceae	Clostridiales	Clostridia	Firmicutes	Bacteria
msp_0709	-0.00292007	0.00111559	0.00885739	21	1.26924e-06	6.29865e-06	0.470272	4.7514	1.04988	4.31651	4.41405	2.83695	0.712117	3.23825	6.96175	3.3314	NA	6.24245	1.67516	6.12396	2.9514	NA	3.42857	2.06298	2.43074	0.372236	2.83421	29.182	2.62027	4.09906	NA	2.55217	7.61375	1	0.153683	Firmicutes bacterium CAG:341_msp_0709	unclassified Firmicutes	unclassified Firmicutes	unclassified Firmicutes	unclassified Firmicutes	Firmicutes	Bacteria
msp_0710	0.00038633	0.000717318	0.590179	7	1.08428e-06	1.69325e-06	0.508756	45.9391	1.84977	NA	NA	NA	NA	NA	38.9245	NA	NA	37.7527	NA	13.9605	NA	NA	2.00348	1.18792	NA	NA	2.84924	NA	NA	NA	3.32172	NA	NA	1	0.90873	Bacteroides sp. CAG:927_msp_0710	Bacteroides	Bacteroidaceae	Bacteroidales	Bacteroidia	Bacteroidetes	Bacteria
msp_0711c	-0.00021621	0.000197892	0.274584	5	4.0537e-09	1.57376e-07	0.600438	1.37636	1.01396	1.32713	NA	NA	NA	NA	NA	NA	NA	NA	NA	16.6499	NA	NA	NA	NA	NA	NA	4.0094	12.5383	NA	NA	NA	65.4752	NA	1	0.719022	Rikenella microfusus_msp_0711c	Rikenella	Rikenellaceae	Bacteroidales	Bacteroidia	Bacteroidetes	Bacteria
msp_0712	0.00241287	0.00140377	0.0856418	20	2.77203e-05	1.23824e-05	2.67168e-05	89.8273	9.8302	4.04187	5.25063	1.37558	4.54337	5.03425	2.9355	4.40976	NA	5.34726	6.63455	6.89309	NA	NA	5.54162	2.7624	NA	5.52534	5.08361	5.70074	5.03824	5.41273	4.90398	6.47061	7.09489	1	0.483797	Lactobacillus salivarius_msp_0712	Lactobacillus	Lactobacillaceae	Lactobacillales	Bacilli	Firmicutes	Bacteria
msp_0713	0.00170516	0.000520837	0.00106082	23	2.16128e-06	1.68126e-06	0.0629292	39.858	1.66273	5.9812	4.98118	2.53601	2.29887	5.5196	7.13051	5.2025	NA	7.15561	4.38032	8.55594	0.5207	0.164462	5.62443	3.90507	4.27375	0.634051	4.30718	8.80211	2.4485	4.55007	1.71006	4.17879	5.13907	1	0.0410566	Clostridium citroniae_msp_0713	Lachnoclostridium	Lachnospiraceae	Clostridiales	Clostridia	Firmicutes	Bacteria
msp_0714c	0.000104306	7.32963e-05	0.154714	5	0	1.66537e-08	0.833154	0	1	NA	NA	NA	NA	NA	NA	NA	NA	28.5754	NA	24.7526	NA	NA	0.646464	0.186459	NA	NA	NA	45.8391	NA	NA	NA	NA	NA	1	0.616489	Selenomonas bovis_msp_0714c	Selenomonas	Selenomonadaceae	Selenomonadales	Negativicutes	Firmicutes	Bacteria
msp_0715c	0.000445037	0.000404403	0.271123	16	2.18356e-06	9.23769e-07	1.34648e-06	94.9659	19.8644	NA	5.63369	5.97582	6.46714	6.93152	4.75448	6.99895	NA	6.11165	6.65995	7.41504	NA	0.107361	7.30537	7.11772	7.21346	NA	7.38803	6.87384	NA	NA	NA	7.04598	NA	1	0.719022	Aggregatibacter segnis_msp_0715c	Aggregatibacter	Pasteurellaceae	Pasteurellales	Gammaproteobacteria	Proteobacteria	Bacteria
msp_0716	-0.000971145	0.000621268	0.118014	21	3.91571e-06	2.36626e-06	0.00216515	61.0169	2.56521	6.23452	4.43687	4.29162	2.55969	6.30945	7.96515	4.59514	NA	7.8223	4.62615	5.67121	1.05107	NA	5.00343	1.72991	3.11908	3.80754	4.43161	8.73394	NA	3.77192	2.06516	3.23745	8.53678	1	0.553155	unclassified_msp_0716	unclassified	unclassified	unclassified	unclassified	unclassified	unclassified
msp_0717	0.000132324	0.000158866	0.404883	20	0	1.12895e-07	0.604306	0	1	1.13451	1.88727	14.3559	0.649107	1.98665	4.03092	1.04707	NA	2.79366	0.697765	1.28365	NA	NA	1.26652	1.56001	1.51851	NA	3.46814	54.945	2.30489	1.53419	0.0617797	2.43375	1.04077	1	0.808534	unclassified Ruminococcus_msp_0717	Ruminococcus	Ruminococcaceae	Clostridiales	Clostridia	Firmicutes	Bacteria
msp_0718	-0.000296325	0.000164892	0.0723223	6	2.58428e-08	9.18898e-08	0.678111	15.284	1.18042	NA	NA	18.8378	0.179977	NA	19.1232	40.4228	NA	1.76554	NA	19.6708	NA	NA	NA	NA	NA	NA	NA	NA	NA	NA	NA	NA	NA	1	0.449806	unclassified Alphaproteobacteria_msp_0718	unclassified Alphaproteobacteria	unclassified Alphaproteobacteria	unclassified Alphaproteobacteria	Alphaproteobacteria	Proteobacteria	Bacteria
msp_0719	7.17584e-05	0.000222722	0.747311	21	2.85024e-07	2.6318e-07	0.0899472	35.5438	1.55144	4.17954	5.41984	13.3364	3.75628	7.74789	11.305	8.51235	NA	8.57485	7.22445	4.18984	NA	NA	2.43255	0.695854	0.907474	0.776849	0.93998	11.098	4.26322	0.631728	0.118496	2.59188	1.29756	1	0.953475	unclassified_msp_0719	unclassified	unclassified	unclassified	unclassified	unclassified	unclassified
msp_0720	0.000243538	0.000343445	0.478262	9	0	6.24389e-07	0.415072	0	1	79.8568	NA	NA	NA	NA	NA	NA	NA	NA	0.871213	1.53	NA	NA	14.8746	0.370927	1.08963	NA	NA	NA	NA	0.85672	0.0224081	0.527709	NA	1	0.856815	Clostridium sp. CAG:1024_msp_0720	unclassified Clostridiales	unclassified Clostridiales	Clostridiales	Clostridia	Firmicutes	Bacteria
msp_0721	-0.000153586	0.000337476	0.649035	2	0	3.92349e-07	0.557627	0	1	NA	NA	NA	NA	NA	NA	NA	NA	NA	NA	NA	NA	NA	71.1525	NA	28.8475	NA	NA	NA	NA	NA	NA	NA	NA	1	0.9275	unclassified Bacteroides_msp_0721	Bacteroides	Bacteroidaceae	Bacteroidales	Bacteroidia	Bacteroidetes	Bacteria
msp_0722	-0.000891837	0.00145678	0.540408	23	3.19099e-05	1.42829e-05	2.12454e-06	73.2441	3.7375	4.34165	4.49567	4.66175	3.86399	4.98315	5.68909	5.29983	NA	5.76411	4.75115	5.78838	2.32145	2.644	5.12872	3.41004	3.81434	1.90078	4.7145	5.89454	2.93712	4.6131	2.91429	4.57651	5.49181	1	0.891291	Blautia sp. Marseille-P3087 _msp_0722	Blautia	Lachnospiraceae	Clostridiales	Clostridia	Firmicutes	Bacteria
msp_0723	-0.000645417	0.000854573	0.450099	21	6.26691e-06	4.1121e-06	0.0335224	61.0014	2.56419	4.29974	8.29385	NA	3.65843	9.23652	10.204	6.6823	NA	9.91243	5.49354	5.80065	0.993289	NA	4.0275	1.87794	1.69576	0.556476	2.75289	10.6541	1.64186	2.79869	0.688076	2.54966	6.1823	1	0.840103	unclassified Firmicutes_msp_0723	unclassified Firmicutes	unclassified Firmicutes	unclassified Firmicutes	unclassified Firmicutes	Firmicutes	Bacteria
msp_0724	-3.79536e-05	8.24029e-05	0.645096	17	0	2.53585e-08	0.785903	0	1	7.41367	NA	3.14261	0.627883	NA	24.2269	1.01021	NA	6.0379	0.368198	0.462673	NA	NA	0.636417	0.102111	0.0909789	0.405784	5.92707	47.9033	NA	0.720728	0.535425	0.388143	NA	1	0.9275	unclassified Burkholderiales_msp_0724	unclassified Burkholderiales	unclassified Burkholderiales	Burkholderiales	Betaproteobacteria	Proteobacteria	Bacteria
msp_0725	-1.38588e-05	0.000125838	0.912304	18	3.531e-08	6.36125e-08	0.109137	15.4045	1.1821	2.02367	1.49126	NA	5.703	12.4401	33.0068	20.4085	NA	NA	NA	3.56033	0.19684	NA	1.57081	0.617089	3.67269	0.0876741	0.646876	11.0884	NA	1.57097	0.297784	0.936679	0.680395	1	0.977649	unclassified Clostridiales_msp_0725	unclassified Clostridiales	unclassified Clostridiales	Clostridiales	Clostridia	Firmicutes	Bacteria
msp_0726	-0.000270688	0.000506887	0.593327	9	1.07527e-06	9.58666e-07	0.492417	89.3686	9.40614	21.959	NA	NA	NA	NA	NA	NA	NA	23.4233	NA	9.86864	NA	NA	2.55027	1.79304	NA	0.320682	13.5202	23.4048	NA	NA	3.16013	NA	NA	1	0.90873	Prevotella sp. CAG:755_msp_0726	Prevotella	Prevotellaceae	Bacteroidales	Bacteroidia	Bacteroidetes	Bacteria
msp_0727	-0.00030105	0.00028263	0.286797	8	1.90435e-07	3.07358e-07	0.0499868	35.0858	1.5405	17.5678	NA	NA	NA	NA	NA	NA	NA	39.2939	NA	12.4389	NA	NA	9.35307	NA	NA	NA	8.63657	NA	NA	5.614	0.4245	6.67127	NA	1	0.727594	unclassified Anaerotruncus_msp_0727	Anaerotruncus	Ruminococcaceae	Clostridiales	Clostridia	Firmicutes	Bacteria
msp_0728	-0.000428837	0.000677141	0.526534	16	4.41549e-06	2.45679e-06	0.00591065	92.2199	12.8533	9.60671	10.2019	NA	NA	NA	NA	NA	NA	10.3487	NA	6.31665	5.89436	NA	6.54374	2.47799	2.16229	1.50654	6.0359	9.8593	9.42518	4.02211	2.18068	6.0493	7.36866	1	0.889367	unclassified_msp_0728	unclassified	unclassified	unclassified	unclassified	unclassified	unclassified
msp_0729	-0.000168909	9.91651e-05	0.0885095	21	0	3.46665e-08	0.155899	0	1	0.771957	0.801437	6.2843	1.21373	1.54365	3.97397	0.550172	NA	2.91029	0.214255	0.373743	NA	NA	0.862669	0.123393	0.366723	0.598287	35.3415	39.6416	0.0890299	0.314683	0.263512	0.35103	3.41008	1	0.493364	unclassified Firmicutes_msp_0729	unclassified Firmicutes	unclassified Firmicutes	unclassified Firmicutes	unclassified Firmicutes	Firmicutes	Bacteria
msp_0730	-6.39355e-05	0.000201098	0.750536	16	1.45846e-07	1.61985e-07	0.321357	41.8975	1.7211	20.384	NA	NA	NA	NA	17.5579	10.6719	NA	NA	3.37109	0.693827	0.205078	NA	1.91548	1.13574	0.287954	0.514248	9.0862	26.6289	NA	1.90101	0.086907	2.59561	2.96404	1	0.953475	unclassified_msp_0730	unclassified	unclassified	unclassified	unclassified	unclassified	unclassified
msp_0732	0.000403642	0.000369815	0.275067	20	1.09884e-06	7.26688e-07	0.00995309	70.7333	3.41685	7.0691	2.36219	11.609	7.17979	9.43408	12.1487	9.57367	NA	10.1052	NA	3.86022	6.02196	NA	2.38579	1.19089	1.60322	0.47084	1.7057	6.72768	NA	0.936039	3.01751	1.28673	1.31167	1	0.719022	unclassified Firmicutes_msp_0732	unclassified Firmicutes	unclassified Firmicutes	unclassified Firmicutes	unclassified Firmicutes	Firmicutes	Bacteria
msp_0733	-0.000833429	0.000506036	0.0995629	22	1.00678e-06	1.47663e-06	0.141843	19.3401	1.23977	2.07327	5.63916	3.50161	1.17323	5.67497	7.27269	2.88867	NA	8.41472	6.74046	7.43708	9.87642	NA	4.16413	1.91473	1.81633	0.693266	4.36141	11.7759	0.649542	2.84887	0.948073	3.05938	7.0761	1	0.517683	Roseburia sp. CAG:471_msp_0733	Roseburia	Lachnospiraceae	Clostridiales	Clostridia	Firmicutes	Bacteria
msp_0734	-6.19839e-05	0.000102518	0.545434	15	0	3.48058e-08	0.448175	0	1	0.383257	NA	NA	NA	11.6549	NA	NA	NA	44.6187	NA	0.248577	NA	NA	4.08589	0.0411003	0.0265398	0.426271	1.38413	34.4245	0.0274781	0.166951	0.0141821	0.146382	2.35105	1	0.891291	Firmicutes bacterium CAG:555_msp_0734	unclassified Firmicutes	unclassified Firmicutes	unclassified Firmicutes	unclassified Firmicutes	Firmicutes	Bacteria
msp_0735	0.000112717	0.000397434	0.776709	22	5.98289e-07	7.71353e-07	0.151768	21.6529	1.27637	0.919089	2.46494	6.36669	5.69725	10.7914	16.2464	3.15574	NA	10.1021	16.3157	4.03226	0.680248	NA	3.16018	1.52487	1.23784	0.0944069	2.42264	10.7952	1.21906	0.728821	0.169221	1.08205	0.793938	1	0.960102	unclassified Firmicutes_msp_0735	unclassified Firmicutes	unclassified Firmicutes	unclassified Firmicutes	unclassified Firmicutes	Firmicutes	Bacteria
msp_0736c	0.000122112	0.000296551	0.680505	2	9.1244e-08	9.71716e-07	0.282895	13.2794	1.15313	NA	NA	NA	NA	NA	93.1283	NA	NA	NA	NA	6.87168	NA	NA	NA	NA	NA	NA	NA	NA	NA	NA	NA	NA	NA	1	0.930503	Bacteroides sp. An322_msp_0736c	Bacteroides	Bacteroidaceae	Bacteroidales	Bacteroidia	Bacteroidetes	Bacteria
msp_0737	0.000357357	0.000190539	0.0607238	21	2.12383e-07	1.77748e-07	0.0476496	55.064	2.22539	3.42472	2.88103	NA	NA	8.52238	16.5624	8.01034	NA	15.0841	12.6764	7.26409	0.280848	0.0781573	2.70801	1.17697	1.00775	0.167472	2.53975	8.40385	0.49065	1.35466	0.744172	3.17431	3.448	1	0.427444	unclassified Clostridiales_msp_0737	unclassified Clostridiales	unclassified Clostridiales	Clostridiales	Clostridia	Firmicutes	Bacteria
msp_0738	-0.000453647	0.000612192	0.458681	6	0	1.34363e-06	0.747741	0	1	NA	NA	NA	NA	NA	NA	10.1702	NA	NA	NA	4.81338	NA	NA	11.211	NA	NA	NA	24.4419	43.9532	NA	5.41035	NA	NA	NA	1	0.849504	unclassified Prevotella_msp_0738	Prevotella	Prevotellaceae	Bacteroidales	Bacteroidia	Bacteroidetes	Bacteria
msp_0739c	5.04789e-05	0.000122023	0.679105	21	1.29262e-07	8.57234e-08	0.0699694	59.5644	2.47307	7.97579	4.19928	3.06008	1.10238	6.46062	6.94605	3.52289	NA	5.56638	NA	10.8067	0.500736	0.0536347	10.0395	5.5592	3.07987	1.56946	7.3354	8.74531	2.7876	3.49516	NA	3.89033	3.30369	1	0.930503	Prevotella timonensis_msp_0739c	Prevotella	Prevotellaceae	Bacteroidales	Bacteroidia	Bacteroidetes	Bacteria
msp_0740	0.000930966	0.000490893	0.0578972	23	1.51758e-06	1.42154e-06	0.218744	31.7682	1.46559	4.44124	4.28725	4.60575	2.55067	6.42752	9.90919	7.22564	NA	9.00905	6.02405	8.38585	0.366827	0.112826	4.57753	6.22117	5.01444	0.245463	2.07247	8.35027	1.53741	2.62954	1.62947	1.71781	2.65856	1	0.411945	unclassified Clostridiales_msp_0740	unclassified Clostridiales	unclassified Clostridiales	Clostridiales	Clostridia	Firmicutes	Bacteria
msp_0741	-0.00027609	0.000339229	0.415717	10	7.11633e-07	4.89078e-07	0.400188	82.7266	5.78924	14.6729	NA	NA	NA	NA	14.2977	NA	NA	15.1852	NA	8.71953	0.366151	NA	9.90447	NA	NA	0.778962	7.44262	13.7916	NA	14.8409	NA	NA	NA	1	0.815763	unclassified Burkholderiales_msp_0741	unclassified Burkholderiales	unclassified Burkholderiales	Burkholderiales	Betaproteobacteria	Proteobacteria	Bacteria
msp_0742	0.00424643	0.00228934	0.0636147	23	7.78771e-05	3.46222e-05	8.73758e-09	75.2087	4.03367	4.86305	4.83515	4.05206	1.3086	5.45475	5.65605	5.66843	NA	5.31639	5.98746	5.70178	2.22186	1.11647	5.37129	4.47846	4.4735	1.74958	5.19126	6.23026	3.80312	3.81299	3.14838	4.74324	4.81588	1	0.436909	Streptococcus parasanguinis_msp_0742	Streptococcus	Streptococcaceae	Lactobacillales	Bacilli	Firmicutes	Bacteria
msp_0743	6.14204e-05	6.71936e-05	0.360674	3	0	4.12502e-07	0.601354	0	1	NA	NA	NA	NA	NA	NA	NA	NA	NA	NA	NA	NA	NA	NA	NA	NA	NA	NA	99.1484	NA	0.748037	NA	0.103541	NA	1	0.781434	unclassified Bacteroidetes_msp_0743	unclassified Bacteroidetes	unclassified Bacteroidetes	unclassified Bacteroidetes	unclassified Bacteroidetes	Bacteroidetes	Bacteria
msp_0744	7.95472e-05	0.000621797	0.898203	10	2.16699e-06	1.66985e-06	0.0256705	78.0916	4.56446	NA	9.45323	NA	NA	3.99913	17.0745	11.6711	NA	10.1189	NA	16.7354	0.633947	NA	5.27089	NA	NA	NA	14.0088	11.0341	NA	NA	NA	NA	NA	1	0.977649	Acidaminococcus sp. CAG:542_msp_0744	Acidaminococcus	Acidaminococcaceae	Acidaminococcales	Negativicutes	Firmicutes	Bacteria
msp_0745	0.000526563	0.00030282	0.082059	21	7.24273e-07	5.31948e-07	0.0438468	50.5295	2.02141	6.37538	3.37118	5.89228	1.80169	2.47909	6.59112	7.31943	NA	5.07008	8.30705	11.6384	1.43067	NA	7.20478	4.04683	4.51769	NA	2.8205	9.54627	1.59465	2.32114	0.236644	2.22128	5.21389	1	0.469112	unclassified Lachnospiraceae_msp_0745	unclassified Lachnospiraceae	Lachnospiraceae	Clostridiales	Clostridia	Firmicutes	Bacteria
msp_0746	3.65543e-05	0.000237208	0.877529	15	0	2.18907e-07	0.879299	0	1	NA	0.738462	20.4743	0.171912	4.89615	17.843	1.64575	NA	7.29333	NA	16.6952	0.30033	NA	24.8075	1.81639	1.35881	0.252888	NA	1.4935	NA	NA	NA	NA	0.212384	1	0.977649	unclassified Prevotella_msp_0746	Prevotella	Prevotellaceae	Bacteroidales	Bacteroidia	Bacteroidetes	Bacteria
msp_0747	-0.000896197	0.000726976	0.21766	22	3.76917e-06	2.96981e-06	0.0117112	45.821	1.84573	4.69854	4.0248	5.95758	3.42277	7.06715	9.56865	4.72601	NA	7.15633	3.11104	3.79033	0.926551	NA	2.98379	1.2065	1.26754	0.236829	8.13485	11.14	1.07483	3.50337	0.321329	3.22903	12.4522	1	0.693351	unclassified Firmicutes_msp_0747	unclassified Firmicutes	unclassified Firmicutes	unclassified Firmicutes	unclassified Firmicutes	Firmicutes	Bacteria
msp_0748	-6.58143e-05	9.72286e-05	0.498467	18	0	3.3551e-08	0.305439	0	1	0.0495871	2.12691	NA	NA	2.99802	4.12794	NA	NA	25.7287	13.6893	0.0653411	0.0273351	NA	0.0338674	0.0360859	0.0516891	NA	4.15527	46.4302	0.0928235	0.0327547	0.00245635	0.0744228	0.277378	1	0.874086	Firmicutes bacterium CAG:460_msp_0748	unclassified Firmicutes	unclassified Firmicutes	unclassified Firmicutes	unclassified Firmicutes	Firmicutes	Bacteria
msp_0749	-0.000147915	0.000165956	0.372773	20	1.64693e-08	9.89503e-08	0.403043	2.58389	1.02652	2.64864	1.79328	0.175625	0.317003	0.289976	0.396716	0.780803	NA	0.719188	0.311302	40.0916	0.0382753	NA	0.518919	0.972641	10.8025	0.358409	3.89947	3.63787	NA	30.7114	0.179339	1.357	NA	1	0.78441	unclassified Proteobacteria_msp_0749	unclassified Proteobacteria	unclassified Proteobacteria	unclassified Proteobacteria	unclassified Proteobacteria	Proteobacteria	Bacteria
msp_0750	5.70579e-06	7.80302e-05	0.941708	20	0	2.49758e-08	0.740392	0	1	2.2391	2.38736	6.16629	4.7459	8.94923	20.2815	NA	NA	13.6605	0.737801	2.86753	NA	NA	3.11553	0.476877	0.851761	0.0393563	0.396685	30.7719	0.666186	0.621725	0.0291241	0.409972	0.585662	1	0.985644	unclassified Lachnoclostridium_msp_0750	Lachnoclostridium	Lachnospiraceae	Clostridiales	Clostridia	Firmicutes	Bacteria
msp_0751	-6.62279e-05	0.00010455	0.526436	22	0	4.4362e-08	0.416647	0	1	0.410862	1.06831	9.55772	0.875489	5.19224	9.44483	2.84467	NA	4.4572	1.7014	1.70776	1.24331	NA	1.00361	0.137104	0.148622	0.0716471	0.577173	19.4902	0.612271	0.377656	0.0310693	1.13427	37.9126	1	0.889367	unclassified Firmicutes_msp_0751	unclassified Firmicutes	unclassified Firmicutes	unclassified Firmicutes	unclassified Firmicutes	Firmicutes	Bacteria
msp_0752	-0.000106332	0.00018198	0.559015	13	6.55541e-08	1.45323e-07	0.23895	16.2097	1.19346	20.0249	NA	NA	2.49699	NA	4.47876	5.75965	NA	21.2384	10.079	5.39687	NA	NA	4.29211	NA	NA	NA	1.84919	13.9413	NA	3.84579	0.54239	6.05473	NA	1	0.891723	Ruminococcus sp. CAG:624_msp_0752	Ruminococcus	Ruminococcaceae	Clostridiales	Clostridia	Firmicutes	Bacteria
msp_0753	-0.000419349	0.000394178	0.287394	20	7.59927e-07	7.20118e-07	0.116575	45.9839	1.8513	1.71793	1.14374	5.2343	3.06498	6.08763	5.0141	3.0368	NA	17.4708	12.5318	4.627	NA	NA	1.51567	3.12591	0.665891	0.200265	12.9958	19.059	NA	0.641908	0.160083	0.89795	0.80837	1	0.727594	unclassified Muribaculaceae_msp_0753	unclassified Muribaculaceae	Muribaculaceae	Bacteroidales	Bacteroidia	Bacteroidetes	Bacteria
msp_0754c	2.0746e-05	0.000140839	0.882893	11	9.23384e-08	8.58959e-08	0.162596	54.6357	2.20438	NA	3.94207	0.758281	NA	1.35149	17.9644	5.67596	NA	7.41706	NA	14.58	NA	NA	12.9089	NA	NA	NA	NA	16.8653	NA	7.29588	NA	11.2407	NA	1	0.977649	Citrobacter werkmanii_msp_0754c	Citrobacter	Enterobacteriaceae	Enterobacterales	Gammaproteobacteria	Proteobacteria	Bacteria
msp_0755c	-0.000289165	0.000156673	0.0649419	3	0	7.51462e-08	0.808624	0	1	15.6318	NA	NA	NA	NA	NA	NA	NA	NA	NA	47.0888	NA	NA	NA	NA	NA	NA	NA	NA	NA	37.2793	NA	NA	NA	1	0.437735	unclassified Firmicutes_msp_0755c	unclassified Firmicutes	unclassified Firmicutes	unclassified Firmicutes	unclassified Firmicutes	Firmicutes	Bacteria
msp_0756	-0.00062371	0.000622504	0.316374	22	3.19606e-06	2.26301e-06	0.0555098	48.9926	1.9605	2.40572	3.36502	9.65567	5.44111	7.04953	8.28605	3.58364	NA	8.41381	9.40807	6.17707	1.49685	NA	3.34662	2.60836	2.33689	0.533189	2.54719	9.26714	0.854022	2.8301	2.05106	2.10184	6.24105	1	0.751168	unclassified Blautia_msp_0756	Blautia	Lachnospiraceae	Clostridiales	Clostridia	Firmicutes	Bacteria
msp_0757	-0.0011861	0.000397916	0.00287513	22	1.19502e-07	7.81463e-07	0.291437	3.37138	1.03489	0.586245	1.50527	6.79604	0.401822	4.94374	15.9507	1.1906	NA	6.81592	10.668	1.89801	3.17275	NA	1.59817	0.482483	0.80724	0.845089	7.18177	17.0224	6.75502	1.50205	0.211861	0.95917	8.70569	1	0.0811444	Clostridium sp. 28_12 _msp_0757	unclassified Clostridiales	unclassified Clostridiales	Clostridiales	Clostridia	Firmicutes	Bacteria
msp_0758	0.000114781	0.00012572	0.361248	18	4.64283e-08	6.85548e-08	0.320586	22.4532	1.28954	2.34655	5.74407	NA	NA	6.93823	28.4432	NA	NA	19.6749	1.5354	10.5517	NA	NA	6.03234	4.21812	0.681147	0.63652	1.76448	5.47472	3.0111	1.1126	0.670443	0.606131	0.558334	1	0.781434	unclassified Lachnospiraceae_msp_0758	unclassified Lachnospiraceae	Lachnospiraceae	Clostridiales	Clostridia	Firmicutes	Bacteria
msp_0759	0.000417978	0.000322334	0.194725	20	1.25067e-06	6.16824e-07	0.00395718	84.6527	6.51582	6.03938	4.82973	NA	7.52834	6.6019	8.02538	7.93931	NA	7.93792	NA	5.28286	2.95286	NA	5.86607	1.8171	2.94488	0.314476	3.18838	7.90707	6.03461	1.7501	2.30258	6.63437	4.10269	1	0.662345	unclassified Firmicutes_msp_0759	unclassified Firmicutes	unclassified Firmicutes	unclassified Firmicutes	unclassified Firmicutes	Firmicutes	Bacteria
msp_0760	-0.00053582	0.000283449	0.0587106	22	0	3.84596e-07	0.636575	0	1	1.56667	4.5132	5.86544	1.99436	1.41997	5.7325	2.27267	NA	9.71002	15.2052	4.22054	0.21574	NA	1.32612	2.93357	0.990238	0.188446	2.93223	23.9419	0.732805	1.0125	0.90063	2.97546	9.34976	1	0.416235	Clostridium sp. 29_15 _msp_0760	unclassified Clostridiales	unclassified Clostridiales	Clostridiales	Clostridia	Firmicutes	Bacteria
msp_0761	-0.000223593	0.000169299	0.186601	22	0	1.14939e-07	0.34875	0	1	0.643179	1.3769	48.2304	0.496128	4.25978	10.635	0.35441	NA	1.66218	1.21999	1.51583	0.325355	NA	0.853808	0.285457	0.435669	0.0401486	0.345751	16.625	0.8702	0.4821	0.213543	0.363676	8.76551	1	0.650964	unclassified Clostridiales_msp_0761	unclassified Clostridiales	unclassified Clostridiales	Clostridiales	Clostridia	Firmicutes	Bacteria
msp_0762	-0.000179736	0.000537903	0.738272	9	5.85898e-07	1.02024e-06	0.186516	26.63	1.36296	NA	NA	NA	NA	NA	NA	NA	NA	NA	NA	21.5294	1.07675	NA	29.3226	NA	NA	0.983039	6.43118	26.8247	0.484216	1.01761	NA	NA	12.3306	1	0.950303	Clostridium sp. CAG:678_msp_0762	unclassified Clostridiales	unclassified Clostridiales	Clostridiales	Clostridia	Firmicutes	Bacteria
msp_0763	-0.0026641	0.00303491	0.380042	23	9.36063e-05	5.87291e-05	0.000540981	51.8078	2.07502	5.5093	4.95856	4.75782	2.91868	5.40352	7.17469	5.61941	NA	7.03426	4.18827	7.00208	1.70625	0.723528	5.28523	4.04613	3.15673	0.942534	4.05418	8.07802	1.86382	4.54211	1.70137	4.647	4.68651	1	0.791268	Oscillibacter sp. ER4 _msp_0763	Oscillibacter	Oscillospiraceae	Clostridiales	Clostridia	Firmicutes	Bacteria
msp_0764	0.000580243	0.000354538	0.10171	22	6.34821e-07	6.67414e-07	0.169715	33.8287	1.51123	18.4587	2.13725	2.33173	0.63114	2.10187	3.99317	1.59811	NA	3.22044	1.47398	11.5321	3.36598	NA	1.76286	1.13911	5.41631	2.1363	1.78781	8.58178	6.27473	4.72084	2.77033	3.62012	10.9453	1	0.517683	unclassified Bacteroidales_msp_0764	unclassified Bacteroidales	unclassified Bacteroidales	Bacteroidales	Bacteroidia	Bacteroidetes	Bacteria
msp_0765	-0.000335693	0.000246896	0.173939	18	0	3.70078e-07	0.50943	0	1	1.90335	1.84861	2.21687	0.0367611	75.302	0.332186	1.77629	NA	1.67239	0.164842	8.34869	NA	NA	0.432276	0.283384	0.0261929	0.00872342	1.21292	1.70547	NA	NA	NA	2.25023	0.478807	1	0.638889	unclassified Prevotellaceae_msp_0765	unclassified Prevotellaceae	Prevotellaceae	Bacteroidales	Bacteroidia	Bacteroidetes	Bacteria
msp_0766	-0.00029788	0.000532092	0.575597	21	2.01186e-06	1.53753e-06	0.0524222	48.6488	1.94737	6.73556	8.22154	NA	7.82078	7.85268	12.7236	7.81413	NA	11.0487	2.18132	5.83774	0.444821	NA	4.41105	1.79213	1.87781	0.29415	1.75727	9.19495	1.05113	2.56515	0.716219	2.78564	2.87365	1	0.900763	unclassified Oscillibacter_msp_0766	Oscillibacter	Oscillospiraceae	Clostridiales	Clostridia	Firmicutes	Bacteria
msp_0767	0.000613963	0.000406063	0.130536	22	0	8.91704e-07	0.876256	0	1	10.1893	8.34335	0.590296	4.36319	2.01918	3.23737	0.88098	NA	4.18607	5.60457	17.5234	2.45914	0.596729	6.02804	6.30037	7.32285	0.480679	0.921598	8.05324	3.38067	1.55822	NA	2.62861	3.33214	1	0.568938	unclassified Lachnospiraceae_msp_0767	unclassified Lachnospiraceae	Lachnospiraceae	Clostridiales	Clostridia	Firmicutes	Bacteria
msp_0768	0.000116187	0.000223218	0.602709	17	3.90726e-08	2.03256e-07	0.350184	4.397	1.04599	3.74033	NA	5.6434	NA	NA	1.11781	23.0595	NA	30.3219	0.471636	4.96642	0.137347	NA	2.45811	NA	3.0433	0.112232	0.853098	10.9633	1.77909	9.13759	NA	1.43296	0.762001	1	0.912368	unclassified_msp_0768	unclassified	unclassified	unclassified	unclassified	unclassified	unclassified
msp_0769	-0.00288348	0.00212916	0.175647	23	7.27162e-05	3.02645e-05	1.71993e-07	79.1358	4.7929	4.70518	4.82785	4.45248	3.35628	4.993	5.43985	5.22813	NA	5.48136	4.42194	5.69564	1.85753	0.549818	5.23528	4.398	4.67195	2.25606	4.97093	5.82254	3.58015	5.05055	3.33959	4.9271	4.7388	1	0.639832	Butyricicoccus sp. N15.MGS-46 _msp_0769	Butyricicoccus	Clostridiaceae	Clostridiales	Clostridia	Firmicutes	Bacteria
msp_0770	0.000549614	0.000342727	0.108791	11	5.93415e-07	5.09602e-07	0.0343938	66.5838	2.99256	NA	6.57237	4.6458	NA	4.2206	8.42417	NA	NA	13.2886	6.83572	17.6985	NA	NA	16.0133	NA	NA	NA	17.904	3.75987	0.637074	NA	NA	NA	NA	1	0.531806	unclassified Clostridiales_msp_0770	unclassified Clostridiales	unclassified Clostridiales	Clostridiales	Clostridia	Firmicutes	Bacteria
msp_0771	-4.2457e-05	5.16896e-05	0.411427	16	0	1.68243e-08	0.181311	0	1	0.282012	0.786092	NA	NA	5.6862	NA	2.10146	NA	8.01152	0.462978	0.95876	0.0400628	NA	1.34051	0.0520921	0.867052	0.0676862	0.0992931	78.6786	0.242358	0.323343	NA	NA	NA	1	0.813803	Clostridiales bacterium UBA644_msp_0771	unclassified Clostridiales	unclassified Clostridiales	Clostridiales	Clostridia	Firmicutes	Bacteria
msp_0772	0.000633155	0.000196798	0.00129408	21	8.05842e-08	1.87388e-07	0.442449	10.6865	1.11965	9.15347	1.48152	1.11231	1.18806	2.36823	4.58622	22.0983	NA	3.98174	2.68417	10.283	1.07468	NA	5.40974	2.89043	5.99285	0.414658	3.05025	16.037	NA	2.23223	0.557608	1.45018	1.95334	1	0.0465398	Clostridiales bacterium 1_7_47FAA _msp_0772	unclassified Clostridiales	unclassified Clostridiales	Clostridiales	Clostridia	Firmicutes	Bacteria
msp_0773	-0.000558635	0.00045426	0.218783	21	1.20591e-06	1.06546e-06	0.0997756	39.1414	1.64315	3.48172	3.68192	NA	6.48335	8.57956	13.5924	6.50484	NA	12.0178	8.39173	3.50449	0.901035	NA	1.72477	1.12795	1.10749	0.219038	1.99304	12.9677	0.889997	1.76591	0.33428	2.09867	8.63224	1	0.693351	unclassified Firmicutes_msp_0773	unclassified Firmicutes	unclassified Firmicutes	unclassified Firmicutes	unclassified Firmicutes	Firmicutes	Bacteria
msp_0774	-0.000148582	0.000456354	0.744739	11	7.96156e-07	8.59775e-07	0.524812	46.9145	1.88375	NA	NA	NA	2.91631	5.26901	18.8928	8.16484	NA	21.3007	17.8855	5.85972	NA	NA	NA	NA	NA	NA	0.527068	13.6149	NA	2.13045	NA	3.43876	NA	1	0.952226	Prevotella sp. CAG:1058_msp_0774	Prevotella	Prevotellaceae	Bacteroidales	Bacteroidia	Bacteroidetes	Bacteria
msp_0775	-0.000167536	0.000141298	0.235744	11	9.99574e-09	7.66933e-08	0.153304	3.37688	1.03495	22.7034	NA	NA	NA	NA	NA	NA	NA	NA	NA	3.05012	NA	NA	3.87069	0.25281	0.582894	0.260442	4.18706	56.969	3.85981	2.25903	NA	2.0047	NA	1	0.700934	unclassified_msp_0775	unclassified	unclassified	unclassified	unclassified	unclassified	unclassified
msp_0776	-0.000151873	0.000175799	0.387641	22	2.0777e-08	1.368e-07	0.0250239	2.51823	1.02583	0.993388	3.10652	4.37039	0.994689	7.94341	9.41557	1.3024	NA	7.46368	3.8204	1.23212	0.465009	NA	0.735287	0.33137	0.293101	0.076021	0.842727	49.5903	0.280948	0.49677	0.0639571	0.782534	5.39937	1	0.795388	unclassified Clostridiales_msp_0776	unclassified Clostridiales	unclassified Clostridiales	Clostridiales	Clostridia	Firmicutes	Bacteria
msp_0777	-0.00104097	0.00160308	0.516106	23	1.65584e-05	1.51511e-05	0.0615543	33.8258	1.51116	6.11077	4.82253	4.81384	2.15549	7.1859	9.21929	5.54999	NA	9.05775	2.65977	7.40673	0.593058	0.600226	4.18592	3.00058	2.0569	0.551461	4.29283	11.6871	1.5907	2.80895	1.34684	3.8135	4.4899	1	0.889367	Firmicutes bacterium CAG:129_msp_0777	unclassified Oscillospiraceae	Oscillospiraceae	Clostridiales	Clostridia	Firmicutes	Bacteria
msp_0778	-0.000233493	0.000320428	0.466191	9	0	3.76411e-07	0.496302	0	1	9.04265	NA	NA	NA	41.4103	NA	NA	NA	NA	NA	8.84046	NA	NA	5.29876	1.02054	0.800295	NA	24.597	NA	NA	8.55819	NA	NA	0.431804	1	0.852379	unclassified Faecalibacterium_msp_0778	Faecalibacterium	Ruminococcaceae	Clostridiales	Clostridia	Firmicutes	Bacteria
msp_0779	-0.00061313	0.00102392	0.549303	20	5.9235e-06	5.43936e-06	0.0502358	44.4455	1.80003	2.30038	0.864763	8.51092	2.24078	3.14473	6.21109	2.23775	NA	3.17406	11.1921	6.27179	1.03017	NA	2.79726	5.98485	4.90576	NA	14.0759	16.4628	0.723639	2.95307	NA	1.58469	3.33343	1	0.891291	Clostridium sp. CAG:417_msp_0779	unclassified Clostridiales	unclassified Clostridiales	Clostridiales	Clostridia	Firmicutes	Bacteria
msp_0780	-0.0040938	0.000991964	3.67584e-05	23	9.77691e-06	6.20633e-06	0.003333	51.776	2.07365	6.61891	4.88057	4.77803	2.59184	5.00624	6.91631	5.15921	NA	7.02945	3.73544	6.88652	2.58434	0.32645	5.83894	3.01766	3.597	0.789548	4.47396	8.61763	1.57449	4.40124	1.30001	4.49576	5.38045	0.0727082	0.00559294	unclassified Lachnospiraceae_msp_0780	unclassified Lachnospiraceae	Lachnospiraceae	Clostridiales	Clostridia	Firmicutes	Bacteria
msp_0781	0.000295416	0.000304779	0.332406	21	4.2836e-07	4.39884e-07	0.0449522	35.4184	1.54843	1.55355	3.4086	12.9958	3.67269	7.00391	20.0417	9.14484	NA	14.2295	NA	3.46504	0.605651	NA	2.64488	0.907808	0.956278	0.108141	1.35352	10.761	0.760125	1.07314	0.571686	1.38158	3.36058	1	0.769005	unclassified Clostridiales_msp_0781	unclassified Clostridiales	unclassified Clostridiales	Clostridiales	Clostridia	Firmicutes	Bacteria
msp_0782	-0.000322998	0.000529476	0.54184	9	1.08301e-06	1.1785e-06	0.269511	50.1205	2.00483	22.4191	NA	NA	NA	NA	NA	NA	NA	NA	NA	10.6442	NA	NA	12.5599	4.17608	9.77209	NA	11.2781	NA	NA	12.011	NA	2.56957	14.57	1	0.891291	Candidatus Gastranaerophilales bacterium MH_37 _msp_0782	Candidatus Gastranaerophilales	Candidatus Gastranaerophilales	Candidatus Gastranaerophilales	Candidatus Melainabacteria	Candidatus Melainabacteria	Bacteria
msp_0783	-5.89447e-05	0.000113234	0.602675	16	3.50257e-08	5.68733e-08	0.23715	19.8985	1.24842	10.2916	9.50598	NA	4.85155	12.8315	10.2127	23.9814	NA	7.65874	0.785976	1.96155	NA	NA	0.919758	0.421056	1.4691	NA	2.92823	NA	0.189135	11.7212	0.270609	NA	NA	1	0.912368	unclassified Firmicutes_msp_0783	unclassified Firmicutes	unclassified Firmicutes	unclassified Firmicutes	unclassified Firmicutes	Firmicutes	Bacteria
msp_0784	-0.000718715	0.000275624	0.00911805	9	4.99747e-11	2.90452e-07	0.391408	0.00542502	1.00005	10.1795	NA	19.9695	NA	NA	NA	NA	NA	NA	NA	2.9281	0.463438	NA	6.58289	0.674454	4.40889	NA	NA	53.1604	NA	1.63281	NA	NA	NA	1	0.154192	unclassified Clostridiales_msp_0784	unclassified Clostridiales	unclassified Clostridiales	Clostridiales	Clostridia	Firmicutes	Bacteria
msp_0785	-0.000217694	0.000343657	0.526432	21	4.8244e-07	6.16703e-07	0.0876681	22.841	1.29603	13.8294	0.81194	1.57251	0.397631	0.93392	9.47021	8.31675	NA	2.40754	11.9829	12.7405	NA	NA	1.95214	1.49452	6.48747	2.19698	3.15267	5.9914	5.11981	1.92481	0.809751	2.11828	6.28885	1	0.889367	Collinsella tanakaei_msp_0785	Collinsella	Coriobacteriaceae	Coriobacteriales	Coriobacteriia	Actinobacteria	Bacteria
msp_0786	-6.24189e-05	0.000208237	0.764368	15	4.05153e-08	1.92512e-07	0.219166	6.15968	1.06564	NA	2.63684	3.65905	3.78836	2.07455	14.9064	9.41865	NA	5.05719	1.97557	7.53888	NA	NA	17.4332	NA	0.540096	NA	NA	21.8787	NA	NA	0.277003	1.73317	7.08232	1	0.95995	unclassified Muribaculaceae_msp_0786	unclassified Muribaculaceae	Muribaculaceae	Bacteroidales	Bacteroidia	Bacteroidetes	Bacteria
msp_0787	-6.67797e-05	0.000110581	0.54591	19	1.72771e-08	5.14121e-08	0.367534	7.64249	1.08275	9.94747	NA	NA	0.132508	4.73207	18.7184	1.40828	NA	4.50738	1.78266	0.779444	NA	NA	1.18719	0.333663	0.545108	0.788011	8.29803	34.01	2.68604	1.84167	0.779103	5.90282	1.62016	1	0.891291	unclassified_msp_0787	unclassified	unclassified	unclassified	unclassified	unclassified	unclassified
msp_0788	9.52072e-05	7.49062e-05	0.203722	13	1.63326e-09	1.92566e-08	0.308936	1.76342	1.01795	25.5282	NA	NA	NA	NA	NA	NA	NA	46.262	NA	2.49899	NA	NA	0.774757	0.0611851	0.15727	0.0474501	1.08553	18.0506	0.470798	3.97403	NA	0.203164	0.885934	1	0.673386	unclassified Rhodospirillales_msp_0788	unclassified Rhodospirillales	unclassified Rhodospirillales	Rhodospirillales	Alphaproteobacteria	Proteobacteria	Bacteria
msp_0789	-0.000327961	0.00136679	0.810369	8	7.07811e-06	7.21255e-06	0.465396	60.4836	2.5306	NA	2.20135	NA	NA	NA	NA	NA	NA	NA	NA	9.93873	NA	NA	18.4951	15.0348	22.2589	8.21569	NA	NA	NA	NA	2.59226	21.2631	NA	1	0.963879	Prevotella sp. CAG:1185_msp_0789	Prevotella	Prevotellaceae	Bacteroidales	Bacteroidia	Bacteroidetes	Bacteria
msp_0790	-7.80658e-05	0.000144902	0.590061	10	1.54305e-08	7.12204e-08	0.464457	6.57657	1.0704	8.41395	NA	NA	NA	NA	NA	NA	NA	NA	3.93836	36.7622	0.18935	NA	3.5623	0.543206	1.65739	NA	NA	40.418	0.386277	4.12903	NA	NA	NA	1	0.90873	unclassified Firmicutes_msp_0790	unclassified Firmicutes	unclassified Firmicutes	unclassified Firmicutes	unclassified Firmicutes	Firmicutes	Bacteria
msp_0791	-3.75602e-05	7.87636e-05	0.633453	16	6.19847e-09	2.6495e-08	0.642818	6.16499	1.0657	7.64731	4.72498	6.3001	0.713983	10.7179	NA	27.5434	NA	12.5257	NA	10.6783	0.135684	0.0100608	12.9481	NA	NA	0.141386	0.879845	4.30786	NA	NA	NA	0.303253	0.422201	1	0.926509	unclassified Oscillibacter_msp_0791	Oscillibacter	Oscillospiraceae	Clostridiales	Clostridia	Firmicutes	Bacteria
msp_0792	0.000289912	0.000490308	0.554329	22	2.18778e-06	1.39427e-06	0.0672065	70.1352	3.34842	6.28968	3.19393	0.678717	3.01273	1.45353	2.41928	2.74337	NA	5.20277	10.031	10.0497	4.88547	0.213235	3.23533	7.17678	NA	1.55077	6.27846	6.23818	1.07491	6.35507	2.67863	4.49637	10.742	1	0.891291	Clostridium perfringens_msp_0792	Clostridium	Clostridiaceae	Clostridiales	Clostridia	Firmicutes	Bacteria
msp_0793	0.000347599	0.000198737	0.0802834	19	7.73279e-08	1.64522e-07	0.264803	11.67	1.13212	3.4753	3.78863	NA	18.8605	6.78946	NA	18.5383	NA	26.8571	NA	2.37594	0.695954	NA	1.43109	0.997935	0.980979	0.108517	1.08406	6.68184	0.562833	0.45929	0.149519	2.01125	4.15146	1	0.465691	unclassified Clostridia_msp_0793	unclassified Clostridia	unclassified Clostridia	unclassified Clostridia	Clostridia	Firmicutes	Bacteria
msp_0794	9.88065e-05	0.000165334	0.550094	22	0	9.62691e-08	0.799789	0	1	0.177519	0.883977	2.52527	0.701765	39.8781	29.9979	2.34562	NA	13.9046	5.73244	0.482794	0.033951	NA	0.330731	0.103486	0.130591	0.0192694	0.152802	1.0829	0.0465715	0.142951	0.0512417	0.183342	1.09215	1	0.891291	unclassified Eggerthellaceae_msp_0794	unclassified Eggerthellaceae	Eggerthellaceae	Eggerthellales	Coriobacteriia	Actinobacteria	Bacteria
msp_0795	-0.000415716	0.000478477	0.384939	14	1.48465e-06	1.05288e-06	0.100616	82.2921	5.64721	9.41714	NA	NA	NA	NA	NA	14.838	NA	15.1288	NA	4.7277	NA	NA	2.49132	2.89974	3.04621	0.476179	4.53128	13.1054	NA	11.7675	0.659687	3.58481	13.3262	1	0.793721	unclassified_msp_0795	unclassified	unclassified	unclassified	unclassified	unclassified	unclassified
msp_0796	8.056e-05	0.000190056	0.671657	13	1.40133e-07	1.62321e-07	0.490224	37.8421	1.60881	NA	16.445	NA	NA	NA	NA	13.2065	NA	NA	NA	8.45898	NA	NA	8.32274	4.97373	3.26233	0.585637	8.19742	20.9762	NA	4.95354	0.587391	3.14206	6.88848	1	0.930503	unclassified Firmicutes_msp_0796	unclassified Firmicutes	unclassified Firmicutes	unclassified Firmicutes	unclassified Firmicutes	Firmicutes	Bacteria
msp_0797	0.000483604	0.000503986	0.337277	3	0	7.86342e-07	0.672347	0	1	NA	NA	NA	NA	NA	NA	NA	NA	NA	NA	47.7452	NA	NA	NA	NA	NA	NA	NA	22.8017	NA	NA	NA	NA	29.4531	1	0.773351	unclassified Ruminococcus_msp_0797	Ruminococcus	Ruminococcaceae	Clostridiales	Clostridia	Firmicutes	Bacteria
msp_0798	-7.52018e-05	0.000123774	0.54347	17	2.19003e-08	6.01608e-08	0.415524	8.25286	1.08995	15.6356	NA	NA	NA	5.92503	5.29704	6.50547	NA	NA	NA	0.714313	0.226919	NA	1.21865	0.0680297	0.439121	0.0619036	0.746274	49.053	0.16109	0.410254	0.130436	0.247943	13.159	1	0.891291	unclassified_msp_0798	unclassified	unclassified	unclassified	unclassified	unclassified	unclassified
msp_0799	0.000462391	0.000445635	0.299456	3	0	7.65761e-07	0.901578	0	1	NA	NA	NA	NA	NA	NA	NA	NA	NA	NA	24.1806	0.327168	NA	75.4922	NA	NA	NA	NA	NA	NA	NA	NA	NA	NA	1	0.733074	unclassified Bacteroides_msp_0799	Bacteroides	Bacteroidaceae	Bacteroidales	Bacteroidia	Bacteroidetes	Bacteria
msp_0800	-0.00018993	0.000242501	0.433501	20	8.18044e-08	2.1903e-07	0.595642	7.40777	1.08	0.256341	1.53137	11.7812	19.4454	23.7123	NA	17.9987	NA	20.9189	NA	0.574905	0.0663625	NA	0.299266	0.125024	0.127425	0.0381362	0.238053	1.69498	0.315568	0.217075	0.0499665	0.21761	0.391373	1	0.825279	Eggerthella sp. 51_9 _msp_0800	Eggerthella	Eggerthellaceae	Eggerthellales	Coriobacteriia	Actinobacteria	Bacteria
msp_0801	0.000558332	0.00051032	0.273919	12	1.35524e-06	1.17465e-06	0.0618953	67.379	3.06551	NA	5.68267	1.36012	1.33842	3.73956	6.86206	18.9047	NA	8.56662	6.10809	NA	NA	NA	16.5657	NA	NA	NA	12.2985	6.82633	NA	NA	NA	11.7472	NA	1	0.719022	Sutterella parvirubra_msp_0801	Sutterella	Sutterellaceae	Burkholderiales	Betaproteobacteria	Proteobacteria	Bacteria
msp_0802	-0.000580072	0.000213555	0.00660231	20	0	2.02019e-07	0.707967	0	1	4.43497	7.31482	2.06042	1.55969	1.767	11.387	9.89962	NA	2.59451	5.63517	5.35225	NA	0.165048	5.4067	NA	0.133834	0.0644301	0.132516	36.3007	NA	4.06578	0.490743	1.01625	0.218614	1	0.125571	Bacteroidales bacterium H3_msp_0802	unclassified Muribaculaceae	Muribaculaceae	Bacteroidales	Bacteroidia	Bacteroidetes	Bacteria
msp_0803	-0.000505782	0.000369787	0.171385	3	2.27415e-07	4.46251e-07	0.202388	53.2079	2.13711	56.0118	NA	NA	NA	NA	NA	NA	NA	NA	NA	27.2765	NA	NA	NA	NA	NA	NA	NA	NA	NA	NA	NA	16.7117	NA	1	0.637218	unclassified_msp_0803	unclassified	unclassified	unclassified	unclassified	unclassified	unclassified
msp_0804	-0.000272609	0.000201503	0.176095	22	0	1.7484e-07	0.707927	0	1	10.7467	2.73051	13.9521	0.488289	14.3477	4.20272	1.84379	NA	6.08944	0.332613	0.747066	0.053784	NA	0.672501	0.343492	0.382247	0.263625	2.89018	30.6578	0.203338	1.66033	1.74792	1.11289	4.53092	1	0.640287	unclassified_msp_0804	unclassified	unclassified	unclassified	unclassified	unclassified	unclassified
msp_0805	-5.36648e-05	0.00118511	0.963882	9	6.08406e-06	5.83285e-06	0.044195	66.6883	3.00195	NA	6.00176	6.72789	14.4969	5.30532	4.17214	11.5792	NA	9.94335	20.3996	NA	NA	NA	NA	NA	NA	NA	NA	21.3739	NA	NA	NA	NA	NA	1	0.989304	unclassified Roseburia_msp_0805	Roseburia	Lachnospiraceae	Clostridiales	Clostridia	Firmicutes	Bacteria
msp_0806	0.000113026	0.000234818	0.630279	15	2.66592e-07	2.41787e-07	0.308527	60.6054	2.53842	12.4604	NA	NA	NA	NA	NA	19.4211	NA	NA	14.1518	3.43773	1.20458	NA	4.49803	1.65303	0.694289	1.37758	10.1585	19.0286	3.3479	4.43236	0.232953	3.90112	NA	1	0.926509	unclassified_msp_0806	unclassified	unclassified	unclassified	unclassified	unclassified	unclassified
msp_0807	-5.83147e-05	6.76643e-05	0.388784	14	5.63225e-09	1.56505e-08	0.683674	9.05232	1.09953	0.349376	NA	NA	NA	18.2638	NA	NA	NA	25.0786	2.74536	0.395152	NA	NA	0.164355	0.166493	0.0749799	0.00997152	NA	39.1027	NA	0.108086	0.0181381	0.238054	13.2849	1	0.796082	unclassified Firmicutes_msp_0807	unclassified Firmicutes	unclassified Firmicutes	unclassified Firmicutes	unclassified Firmicutes	Firmicutes	Bacteria
msp_0808	-0.000516175	0.000873023	0.554353	18	6.27176e-06	4.00251e-06	0.0389673	87.4302	7.95555	9.94201	NA	NA	NA	NA	12.125	8.59783	NA	10.0204	10.6437	4.75571	1.15359	NA	5.06568	3.09501	2.79746	1.76757	4.82768	11.8694	1.3691	3.11006	0.276938	4.37654	4.20632	1	0.891291	Clostridium sp. CAG:288_msp_0808	unclassified Clostridiales	unclassified Clostridiales	Clostridiales	Clostridia	Firmicutes	Bacteria
msp_0809	3.19382e-05	0.000736042	0.965389	6	2.34007e-06	2.04329e-06	0.00577237	77.6353	4.47133	NA	NA	NA	NA	NA	NA	NA	NA	NA	NA	16.6885	NA	NA	20.4257	14.8132	13.1826	NA	20.8403	NA	NA	14.0497	NA	NA	NA	1	0.989813	unclassified_msp_0809	unclassified	unclassified	unclassified	unclassified	unclassified	unclassified
msp_0810	-0.000259722	0.000192948	0.178279	10	7.87373e-08	1.5951e-07	0.221008	22.0485	1.28285	17.7586	NA	NA	NA	NA	NA	NA	NA	NA	NA	3.79492	NA	NA	5.99754	2.68575	3.45437	NA	12.3892	19.0297	NA	10.8784	NA	12.94	11.0715	1	0.645704	unclassified_msp_0810	unclassified	unclassified	unclassified	unclassified	unclassified	unclassified
msp_0811	-0.000127049	0.0011284	0.910354	20	1.37051e-05	7.21722e-06	0.0105296	91.4051	11.6348	5.49185	8.66857	NA	NA	9.16025	9.13491	8.33173	NA	9.02082	8.5702	4.76113	2.60598	NA	3.85167	1.86813	1.51401	0.687588	3.15437	9.0952	2.89649	3.04864	1.07852	3.63415	3.42579	1	0.977649	[Staphylococcus] sp. CAG:324_msp_0811	unclassified Firmicutes	unclassified Firmicutes	unclassified Firmicutes	unclassified Firmicutes	Firmicutes	Bacteria
msp_0812	8.28284e-05	6.09102e-05	0.173879	12	0	1.82622e-08	0.747759	0	1	NA	NA	0.784922	NA	7.1207	NA	NA	NA	70.2876	NA	2.24726	NA	NA	1.24128	0.651462	1.21803	NA	0.677189	12.2851	NA	0.481046	NA	1.37035	1.63505	1	0.638889	unclassified Lachnoclostridium_msp_0812	Lachnoclostridium	Lachnospiraceae	Clostridiales	Clostridia	Firmicutes	Bacteria
msp_0813	-0.000104278	8.2504e-05	0.206259	9	0	2.65604e-08	0.387217	0	1	NA	4.37761	2.79977	NA	12.882	NA	NA	NA	12.2123	NA	NA	NA	NA	13.8428	NA	0.428721	NA	4.62858	45.9849	NA	NA	NA	NA	2.84334	1	0.676585	unclassified Muribaculaceae_msp_0813	unclassified Muribaculaceae	Muribaculaceae	Bacteroidales	Bacteroidia	Bacteroidetes	Bacteria
msp_0814	0.000160977	0.000130601	0.217732	22	0	7.1853e-08	0.319773	0	1	3.28662	2.28868	7.3219	1.34317	5.52871	16.5966	25.4727	NA	20.8564	NA	3.51691	0.156329	0.036683	1.38089	0.686112	0.708851	0.111124	1.14044	6.06352	0.394857	0.721754	0.266914	0.800407	1.32044	1	0.693351	Lachnoclostridium sp. An138_msp_0814	Lachnoclostridium	Lachnospiraceae	Clostridiales	Clostridia	Firmicutes	Bacteria
msp_0815	2.73963e-05	9.31789e-05	0.768744	16	1.09553e-08	3.49034e-08	0.313556	8.06059	1.08767	5.0497	8.13906	5.95232	NA	NA	15.6128	26.3006	NA	17.0253	1.0855	1.11747	0.217265	NA	0.490358	NA	1.26589	0.193658	NA	16.056	NA	0.711377	0.0914941	0.691189	NA	1	0.960102	unclassified_msp_0815	unclassified	unclassified	unclassified	unclassified	unclassified	unclassified
msp_0816c	2.06549e-05	0.00010385	0.842347	16	1.65458e-08	5.02408e-08	0.417424	9.84042	1.10914	3.84213	3.13072	4.53762	NA	1.07358	NA	11.1015	NA	NA	NA	19.4079	0.292026	NA	16.5036	2.34241	5.80043	1.18664	9.85414	7.18909	NA	9.5159	NA	0.328673	3.89377	1	0.969276	unclassified Clostridiales_msp_0816c	unclassified Clostridiales	unclassified Clostridiales	Clostridiales	Clostridia	Firmicutes	Bacteria
msp_0817	-0.00024803	0.000223456	0.267011	21	3.58184e-08	2.35115e-07	0.150724	3.33653	1.03452	17.2018	1.24421	1.05615	0.468651	4.82259	2.18829	0.880496	NA	1.59476	0.641886	7.69453	1.01114	NA	5.9272	2.43426	0.810074	0.075443	3.95478	9.51605	0.751245	5.37531	NA	15.3223	17.0289	1	0.719022	unclassified Faecalibacterium_msp_0817	Faecalibacterium	Ruminococcaceae	Clostridiales	Clostridia	Firmicutes	Bacteria
msp_0818	-0.00261889	0.00136197	0.0544965	23	1.46061e-05	1.12283e-05	0.0159802	42.498	1.73907	3.49612	3.75834	6.28012	1.15463	5.29015	8.42569	4.03048	NA	6.51813	9.01827	5.40758	1.83029	2.21645	3.40011	2.53005	1.9236	1.15269	6.04787	10.1646	1.94349	3.39001	1.32358	2.60822	8.08954	1	0.402217	Clostridium sp. CAG:302_msp_0818	unclassified Clostridiales	unclassified Clostridiales	Clostridiales	Clostridia	Firmicutes	Bacteria
msp_0819	7.94197e-05	0.000160759	0.621286	12	2.60573e-08	9.40259e-08	0.378369	8.25094	1.08993	6.23393	NA	17.4351	NA	26.1557	33.1116	0.409142	NA	NA	0.0214737	0.732311	NA	NA	1.74531	0.55355	NA	NA	NA	NA	NA	9.45112	NA	1.10433	3.04654	1	0.921641	Candidatus Gastranaerophilales bacterium HUM_2 _msp_0819	Candidatus Gastranaerophilales	Candidatus Gastranaerophilales	Candidatus Gastranaerophilales	Candidatus Melainabacteria	Candidatus Melainabacteria	Bacteria
msp_0820	-0.00609468	0.00174586	0.000481343	22	4.98544e-05	2.02223e-05	1.79692e-10	82.5703	5.73733	5.31168	4.94999	4.77144	3.66484	5.24206	5.5841	5.19584	NA	5.52187	4.76201	5.62635	3.41074	NA	5.138	4.19006	4.22409	1.63052	4.6153	5.749	2.83724	4.87846	2.76224	4.75144	5.18273	0.952097	0.0245695	unclassified Clostridiales_msp_0820	unclassified Clostridiales	unclassified Clostridiales	Clostridiales	Clostridia	Firmicutes	Bacteria
msp_0821	-0.000506948	0.000724657	0.484196	21	4.46234e-06	2.88096e-06	0.0107502	75.7819	4.12914	4.35407	8.17404	11.5098	3.33228	11.0821	7.73133	7.88964	NA	6.706	5.14372	2.55278	0.294235	NA	2.35392	2.07037	0.556793	2.23069	5.72025	11.1587	1.33973	2.16292	0.382619	3.25396	NA	1	0.861276	Firmicutes bacterium CAG:313_msp_0821	unclassified Firmicutes	unclassified Firmicutes	unclassified Firmicutes	unclassified Firmicutes	Firmicutes	Bacteria
msp_0822	-6.1146e-06	0.000103439	0.952862	15	0	4.86797e-08	0.574412	0	1	6.82199	NA	NA	NA	5.00223	NA	1.81015	NA	14.1478	1.21136	0.29339	0.465338	NA	0.475745	0.440683	0.068338	NA	1.36161	66.5745	NA	0.10052	NA	1.13482	0.0914386	1	0.986786	unclassified Firmicutes_msp_0822	unclassified Firmicutes	unclassified Firmicutes	unclassified Firmicutes	unclassified Firmicutes	Firmicutes	Bacteria
msp_0823	-0.00035501	0.000323969	0.273159	12	7.52655e-08	3.8929e-07	0.698634	5.67196	1.06013	23.3938	25.3471	NA	0.446845	NA	27.0004	4.86278	NA	7.14002	1.90743	2.83277	0.472083	NA	4.66406	0.487426	1.44525	NA	NA	NA	NA	NA	NA	NA	NA	1	0.719022	Ruminococcus sp. CAG:724_msp_0823	Ruminococcus	Ruminococcaceae	Clostridiales	Clostridia	Firmicutes	Bacteria
msp_0824	-0.000785484	0.000277659	0.00467005	8	6.7926e-08	2.822e-07	0.352271	10.6729	1.11948	33.4036	NA	NA	NA	NA	NA	NA	NA	NA	NA	10.6425	NA	NA	9.2212	NA	2.04611	NA	15.8759	NA	NA	4.35807	0.399511	NA	24.0531	1	0.102637	Clostridium sp. CAG:967_msp_0824	unclassified Clostridiales	unclassified Clostridiales	Clostridiales	Clostridia	Firmicutes	Bacteria
msp_0825	-0.000200678	0.000251973	0.425785	10	1.23136e-07	2.31611e-07	0.370191	22.8413	1.29603	2.93051	NA	NA	NA	NA	NA	NA	NA	17.3788	NA	30.5191	1.11233	NA	8.52526	4.60482	1.90737	0.870181	NA	29.2684	NA	2.88326	NA	NA	NA	1	0.821261	Firmicutes bacterium CAG:791_msp_0825	unclassified Firmicutes	unclassified Firmicutes	unclassified Firmicutes	unclassified Firmicutes	Firmicutes	Bacteria
msp_0826	-0.00021966	0.000186717	0.240447	1	NA	NA	NA	NA	NA	NA	NA	NA	NA	NA	NA	NA	NA	NA	NA	100	NA	NA	NA	NA	NA	NA	NA	NA	NA	NA	NA	NA	NA	1	0.701201	unclassified Firmicutes_msp_0826	unclassified Firmicutes	unclassified Firmicutes	unclassified Firmicutes	unclassified Firmicutes	Firmicutes	Bacteria
msp_0827	0.000137136	0.000153821	0.372647	12	0	8.64517e-08	0.497946	0	1	33.2962	11.965	NA	NA	NA	NA	NA	NA	32.2356	NA	1.94163	NA	NA	6.15282	0.410214	3.06231	0.0434894	4.63438	3.42128	NA	NA	NA	0.303142	2.53397	1	0.78441	unclassified Odoribacteraceae_msp_0827	unclassified Odoribacteraceae	Odoribacteraceae	Bacteroidales	Bacteroidia	Bacteroidetes	Bacteria
msp_0828	0.000139367	0.000351241	0.691527	20	6.72622e-07	6.6589e-07	0.0888087	34.4301	1.52509	1.91579	3.46778	6.26791	NA	7.03185	NA	14.6424	NA	11.1306	NA	10.83	1.7681	0.341382	4.22374	3.75527	4.77876	0.426454	5.12593	8.71629	3.96556	2.54349	0.691507	3.22797	5.14917	1	0.930503	Massiliomicrobiota sp. An80 _msp_0828	Massiliomicrobiota	Erysipelotrichaceae	Erysipelotrichales	Erysipelotrichia	Firmicutes	Bacteria
msp_0829	-0.000115199	0.000169654	0.497121	13	0	1.2649e-07	0.750845	0	1	9.97441	NA	NA	NA	26.5915	NA	14.3146	NA	NA	NA	4.78844	NA	NA	4.47163	1.10357	4.53799	1.09452	7.85528	NA	6.57177	1.56131	NA	4.28403	12.851	1	0.873272	unclassified Lachnospiraceae_msp_0829	unclassified Lachnospiraceae	Lachnospiraceae	Clostridiales	Clostridia	Firmicutes	Bacteria
msp_0830	-0.000108169	0.000191437	0.572049	14	9.35286e-08	1.43974e-07	0.313666	22.804	1.2954	13.7302	8.32603	NA	NA	NA	NA	12.7674	NA	24.2462	0.0547123	2.07855	0.154111	NA	1.06862	1.16959	0.305825	0.442684	10.6856	NA	NA	23.5747	NA	1.39583	NA	1	0.900763	unclassified Proteobacteria_msp_0830	unclassified Proteobacteria	unclassified Proteobacteria	unclassified Proteobacteria	unclassified Proteobacteria	Proteobacteria	Bacteria
msp_0831	0.000572855	0.000282019	0.0422285	21	3.53672e-07	4.25386e-07	0.0988632	27.4275	1.37793	1.80085	1.85962	2.66241	3.6478	3.35176	19.4134	8.99573	NA	7.70783	NA	6.13573	1.09999	NA	2.33008	2.58873	2.75561	0.556504	2.28563	9.0997	3.45003	3.92052	4.36223	2.74068	9.23519	1	0.36385	Faecalicoccus pleomorphus_msp_0831	Faecalicoccus	Erysipelotrichaceae	Erysipelotrichales	Erysipelotrichia	Firmicutes	Bacteria
msp_0832	0.00122008	0.000623732	0.0504529	17	3.13668e-06	1.99401e-06	0.00927768	86.5	7.40739	11.7503	2.01582	2.41461	1.10853	1.56452	3.51076	7.38413	NA	3.3353	12.042	12.3024	NA	NA	2.04931	8.26062	10.7804	0.868522	5.76132	7.83188	NA	NA	NA	7.01946	NA	1	0.386806	Streptococcus pasteurianus_msp_0832	Streptococcus	Streptococcaceae	Lactobacillales	Bacilli	Firmicutes	Bacteria
msp_0833	-0.0012533	0.00102499	0.221425	23	7.15902e-06	6.11345e-06	0.000137589	37.5045	1.60012	3.17667	4.88776	2.40103	3.48871	6.74251	6.73371	5.93609	NA	10.6444	11.4045	8.81163	1.05023	0.0685006	3.53834	3.21433	1.95616	0.639307	3.62039	8.00589	0.844404	3.6974	1.18414	3.26779	4.68612	1	0.693351	Streptococcus thermophilus_msp_0833	Streptococcus	Streptococcaceae	Lactobacillales	Bacilli	Firmicutes	Bacteria
msp_0834	0.000581924	0.000539427	0.280685	11	3.17756e-07	1.17823e-06	0.34859	9.92499	1.11019	NA	1.02574	NA	0.505177	1.80277	NA	22.0881	NA	3.32347	NA	NA	NA	NA	23.3135	4.44783	NA	NA	12.9031	12.7221	NA	6.72076	NA	11.1475	NA	1	0.721971	unclassified Dialister_msp_0834	Dialister	Veillonellaceae	Veillonellales	Negativicutes	Firmicutes	Bacteria
msp_0835	-0.000293741	0.000312913	0.34787	20	1.22826e-07	3.80744e-07	0.1049	6.25892	1.06677	0.344747	16.9579	NA	NA	7.41551	10.3633	1.53306	NA	13.906	4.87101	0.91192	0.216441	NA	0.547719	1.05597	0.254697	0.0319637	0.554279	39.8955	0.0738184	0.375074	0.158418	0.395054	0.13767	1	0.780144	Clostridiales bacterium 41_21_two_genomes_msp_0835	unclassified Clostridiales	unclassified Clostridiales	Clostridiales	Clostridia	Firmicutes	Bacteria
msp_0836	-5.25238e-05	8.07115e-05	0.515202	13	2.37236e-09	2.42947e-08	0.540953	2.44183	1.02503	NA	5.43418	NA	0.0783976	0.90031	10.5945	18.477	NA	38.6623	2.36153	2.82021	NA	NA	0.50409	NA	0.208733	NA	1.70447	18.2072	NA	NA	0.0470478	NA	NA	1	0.889367	unclassified Muribaculaceae_msp_0836	unclassified Muribaculaceae	Muribaculaceae	Bacteroidales	Bacteroidia	Bacteroidetes	Bacteria
msp_0837	0.000137133	0.000350504	0.695616	17	3.01664e-07	5.00819e-07	0.137348	18.2253	1.22287	0.923187	2.95692	NA	0.954753	16.5895	NA	11.3087	NA	16.1352	NA	2.83674	NA	NA	2.91595	0.319113	0.482648	0.186994	2.97901	7.73034	NA	1.42222	0.234375	1.27998	30.7444	1	0.93157	unclassified Firmicutes_msp_0837	unclassified Firmicutes	unclassified Firmicutes	unclassified Firmicutes	unclassified Firmicutes	Firmicutes	Bacteria
msp_0838	0.000181232	0.000366658	0.621108	20	1.27997e-06	7.4987e-07	0.0655405	73.8621	3.82586	6.88892	8.63753	4.69597	NA	9.74075	2.64057	1.95037	NA	7.52874	0.342904	1.6204	NA	NA	6.69653	4.91793	7.76651	1.18777	3.56644	10.1271	0.276195	9.51584	2.54292	6.9053	2.45137	1	0.921641	Candidatus Gastranaerophilales bacterium HUM_6 _msp_0838	Candidatus Gastranaerophilales	Candidatus Gastranaerophilales	Candidatus Gastranaerophilales	Candidatus Melainabacteria	Candidatus Melainabacteria	Bacteria
msp_0839	0.000224258	0.000195908	0.252328	11	2.92551e-09	2.00784e-07	0.049428	0.32578	1.00327	0.606457	NA	NA	NA	NA	NA	NA	NA	74.6837	NA	1.47289	NA	NA	3.13643	0.186856	NA	0.49899	0.113684	10.2143	NA	8.60359	NA	0.232446	0.250631	1	0.707423	Clostridium sp. CAG:964_msp_0839	unclassified Clostridiales	unclassified Clostridiales	Clostridiales	Clostridia	Firmicutes	Bacteria
msp_0840	4.31315e-05	8.99557e-05	0.631601	17	8.77983e-09	3.16293e-08	0.298113	6.36473	1.06797	1.50931	7.83841	NA	2.81074	3.86972	NA	NA	NA	19.658	NA	1.92425	0.059605	NA	0.269785	0.285565	0.448924	0.151185	0.704897	17.6054	0.241553	1.10998	NA	11.7425	29.7701	1	0.926509	unclassified_msp_0840	unclassified	unclassified	unclassified	unclassified	unclassified	unclassified
msp_0841	0.000220229	0.00111618	0.843587	22	1.21945e-05	7.41067e-06	0.308043	66.8585	3.01736	3.95059	3.83282	4.88079	9.34761	5.84599	8.96169	7.0441	NA	7.76853	5.22423	4.97536	1.22517	NA	3.26957	1.69121	1.6825	0.488448	2.87507	9.71525	3.63657	3.23722	1.00276	2.51595	6.82857	1	0.969276	unclassified Oscillibacter_msp_0841	Oscillibacter	Oscillospiraceae	Clostridiales	Clostridia	Firmicutes	Bacteria
msp_0842	-6.68769e-05	0.000132925	0.614881	20	6.4238e-08	8.35554e-08	0.139319	23.3533	1.30469	4.51662	2.17361	9.78809	4.99142	18.7283	13.0837	7.11667	NA	17.0845	NA	2.76461	0.225551	NA	1.49366	0.62112	0.965042	0.249585	0.981445	6.46877	3.08967	0.925109	NA	1.02499	3.70757	1	0.9193	unclassified_msp_0842	unclassified	unclassified	unclassified	unclassified	unclassified	unclassified
msp_0843	0.000108101	0.000113156	0.339412	17	6.7846e-08	5.98239e-08	0.108786	44.1064	1.78911	13.26	3.20807	1.57436	0.444775	0.548385	1.63279	0.339209	NA	2.12854	3.21121	13.3368	NA	NA	11.8727	NA	2.40969	1.32247	6.92564	12.158	NA	NA	NA	10.8372	14.7902	1	0.776783	Weissella confusa_msp_0843	Weissella	Leuconostocaceae	Lactobacillales	Bacilli	Firmicutes	Bacteria
msp_0844c	0.000384174	0.000352729	0.276089	18	1.87446e-06	7.50608e-07	2.37603e-06	95.506	22.2517	6.57914	6.52567	4.99586	6.05999	5.78316	3.79499	6.09842	NA	6.13803	6.24493	6.5495	NA	NA	5.83497	5.95739	6.44585	1.48276	6.21084	4.89841	NA	NA	NA	3.89892	6.50118	1	0.719022	Campylobacter concisus 2_msp_0844c	Campylobacter	Campylobacteraceae	Campylobacterales	Epsilonproteobacteria	Proteobacteria	Bacteria
msp_0845	-0.00183502	0.000742001	0.0133957	22	2.735e-06	2.99423e-06	0.193461	27.3909	1.37724	3.01909	2.53148	3.12389	0.595932	4.53812	9.4848	8.05591	NA	6.55211	2.31168	5.74069	0.737689	NA	7.83291	1.18623	0.76227	0.387444	3.42869	12.4467	1.09111	2.20628	7.67448	2.95843	13.3341	1	0.200733	Clostridium sp. CAG:440_msp_0845	unclassified Clostridiales	unclassified Clostridiales	Clostridiales	Clostridia	Firmicutes	Bacteria
msp_0846	1.05395e-05	0.000138312	0.939259	18	0	8.36424e-08	0.617115	0	1	NA	1.15772	9.02315	0.607238	4.61325	10.3482	35.8087	NA	4.38218	4.76197	6.74582	0.299243	NA	1.36403	NA	1.15635	0.242441	0.189996	8.03862	NA	1.19387	NA	0.74659	9.3206	1	0.985259	unclassified Cloacibacillus_msp_0846	Cloacibacillus	Synergistaceae	Synergistales	Synergistia	Synergistetes	Bacteria
msp_0847	6.08992e-06	0.000458661	0.989406	21	2.23696e-06	1.21596e-06	0.00367951	75.4135	4.06727	6.85478	8.81489	NA	4.88408	8.73454	8.07913	7.19258	NA	8.27637	4.16518	4.61605	0.820924	NA	3.47059	2.68425	3.69077	0.573923	1.97233	8.23413	0.98784	3.28019	0.572441	3.54463	8.55037	1	0.996671	unclassified_msp_0847	unclassified	unclassified	unclassified	unclassified	unclassified	unclassified
msp_0848	0.000414512	0.00025989	0.110722	21	3.00057e-07	3.7353e-07	0.169966	23.9693	1.31526	9.51231	1.63812	2.63511	6.87684	5.77739	12.1368	7.11483	NA	6.23106	11.9755	8.9885	0.625851	NA	3.47453	1.01373	1.55552	0.531772	2.38673	3.32756	5.13485	4.55107	NA	2.48282	2.02905	1	0.533331	unclassified Clostridiales_msp_0848	unclassified Clostridiales	unclassified Clostridiales	Clostridiales	Clostridia	Firmicutes	Bacteria
msp_0849	-5.04813e-05	8.00057e-05	0.528059	9	5.00684e-09	2.38286e-08	0.397437	8.069	1.08777	14.8126	8.89018	NA	NA	NA	NA	NA	NA	NA	NA	5.36873	NA	NA	18.3709	NA	10.5263	0.428321	1.10916	40.4884	0.00547417	NA	NA	NA	NA	1	0.889367	unclassified Alistipes_msp_0849	Alistipes	Rikenellaceae	Bacteroidales	Bacteroidia	Bacteroidetes	Bacteria
msp_0850	5.61891e-05	0.000648399	0.930943	22	3.6887e-06	2.51924e-06	0.00746833	52.1283	2.08892	5.38639	3.60215	6.94794	2.27309	7.06462	9.45816	5.35512	NA	7.8255	6.78266	4.87096	3.41642	NA	2.76216	1.50546	1.79829	0.518866	4.50084	10.0235	2.97384	2.76769	1.05846	2.66416	6.44372	1	0.981222	unclassified Firmicutes_msp_0850	unclassified Firmicutes	unclassified Firmicutes	unclassified Firmicutes	unclassified Firmicutes	Firmicutes	Bacteria
msp_0851	0.000225829	0.000218865	0.302157	21	6.11073e-08	2.20417e-07	0.198972	6.11159	1.06509	1.10554	3.23526	1.08249	1.98331	2.23043	8.89219	3.56684	NA	5.08203	NA	29.0833	0.234436	NA	2.11796	0.92847	6.78088	0.519376	1.99741	6.57135	0.753165	1.45572	1.17868	5.71952	15.4816	1	0.736042	unclassified Clostridiales_msp_0851	unclassified Clostridiales	unclassified Clostridiales	Clostridiales	Clostridia	Firmicutes	Bacteria
msp_0852	-0.000242925	0.000298054	0.41505	22	6.89929e-07	5.30647e-07	0.0534472	41.5528	1.71095	4.38602	8.08724	2.06607	2.85268	2.48669	5.60497	5.77996	NA	6.74376	8.60126	8.71842	0.384445	NA	3.96399	4.40945	5.66576	1.49589	6.45581	6.11949	1.27939	4.57118	0.827005	1.1372	8.36335	1	0.815263	Eubacterium dolichum_msp_0852	unclassified Erysipelotrichaceae	Erysipelotrichaceae	Erysipelotrichales	Erysipelotrichia	Firmicutes	Bacteria
msp_0853c	0.000936121	0.000319213	0.00336153	18	1.22362e-06	6.02741e-07	1.36992e-08	88.3455	8.58036	3.95855	4.64192	3.24074	7.2666	4.68572	7.19874	7.05076	NA	7.18962	NA	8.29778	4.75565	NA	4.5297	5.86178	4.05651	1.1302	5.83702	6.49797	NA	8.06269	NA	5.73806	NA	1	0.0831138	Granulicatella adiacens_msp_0853c	Granulicatella	Carnobacteriaceae	Lactobacillales	Bacilli	Firmicutes	Bacteria
msp_0854	-0.000590771	0.000443892	0.183225	21	0	7.25548e-07	0.134167	0	1	1.54129	0.987786	NA	0.200352	22.3589	7.20497	14.0508	NA	10.3892	0.072981	0.864539	0.13494	NA	0.282673	0.328683	0.20093	0.0815639	0.347593	39.8172	0.096475	0.321999	0.017571	0.567448	0.132132	1	0.650535	Clostridium sp. CAG:349_msp_0854	unclassified Clostridiales	unclassified Clostridiales	Clostridiales	Clostridia	Firmicutes	Bacteria
msp_0855	0.0002553	0.000192832	0.185519	21	1.43802e-07	1.85408e-07	0.107413	22.8648	1.29642	4.05974	4.41062	NA	4.76981	4.66069	13.074	11.7871	NA	9.09879	18.1654	5.15079	0.412579	NA	2.36645	0.799966	0.969167	0.101238	0.869219	9.96385	1.44313	0.860984	2.31334	2.38486	2.33822	1	0.650535	unclassified Clostridiales_msp_0855	unclassified Clostridiales	unclassified Clostridiales	Clostridiales	Clostridia	Firmicutes	Bacteria
msp_0856	-0.000554006	0.000371405	0.135791	22	5.01108e-07	6.50732e-07	0.0243124	21.3405	1.2713	1.20071	13.1759	5.3276	0.279708	4.96901	14.2222	3.98236	NA	4.57223	5.51031	2.06142	0.603118	NA	2.71656	1.03032	0.856638	0.0698915	15.945	17.4484	0.134501	1.10269	0.157781	3.5571	1.07652	1	0.580118	Clostridium sp. 28_17 _msp_0856	unclassified Clostridiales	unclassified Clostridiales	Clostridiales	Clostridia	Firmicutes	Bacteria
msp_0857	0.000511252	0.000528938	0.333763	4	0	1.06914e-06	0.700154	0	1	NA	NA	NA	NA	NA	NA	NA	NA	NA	NA	65.2297	NA	NA	12.3079	2.69449	NA	NA	NA	NA	NA	19.7679	NA	NA	NA	1	0.769634	unclassified Muribaculaceae_msp_0857	unclassified Muribaculaceae	Muribaculaceae	Bacteroidales	Bacteroidia	Bacteroidetes	Bacteria
msp_0858	-0.000831875	0.000339439	0.0142565	22	1.09504e-08	4.75411e-07	0.0936718	0.318394	1.00319	1.53633	2.99674	2.30125	0.285205	19.0098	4.19953	0.635589	NA	2.21039	5.13022	0.900897	0.245408	NA	0.619789	0.456885	0.52414	0.0745771	0.813448	51.1308	0.820302	0.481495	1.32973	2.84459	1.4529	1	0.201424	Clostridium sp. CAG:433_msp_0858	unclassified Clostridiales	unclassified Clostridiales	Clostridiales	Clostridia	Firmicutes	Bacteria
msp_0859	0.00107874	0.000417211	0.00972114	12	2.20023e-07	6.72466e-07	0.504682	10.3877	1.11592	41.2869	14.0073	NA	NA	NA	NA	NA	NA	NA	NA	16.1817	NA	NA	1.29168	1.01345	1.02339	1.20119	2.70684	11.2291	NA	0.464873	NA	1.75089	7.84261	1	0.161288	unclassified_msp_0859	unclassified	unclassified	unclassified	unclassified	unclassified	unclassified
msp_0860	-0.00120509	0.000408461	0.00317459	23	0	7.74169e-07	0.668322	0	1	2.16898	2.7709	1.35283	0.993	1.82492	7.4093	2.31817	NA	6.26638	25.2983	5.98305	0.521606	0.058956	3.16761	1.36673	1.31321	0.340138	2.3629	16.0763	0.559014	1.93653	0.253456	3.26456	12.3931	1	0.082623	unclassified Intestinibacter_msp_0860	Intestinibacter	Peptostreptococcaceae	Clostridiales	Clostridia	Firmicutes	Bacteria
msp_0861	0.00124166	0.000882692	0.159523	23	1.04264e-05	5.0713e-06	6.73145e-05	67.8916	3.11445	5.86111	4.79848	4.96038	3.75317	5.35451	6.2927	5.40249	NA	6.07121	4.14241	6.14395	1.41939	0.152182	5.15425	4.16746	3.89644	1.53282	4.74725	6.5685	2.36172	4.83812	2.25735	5.21358	4.91052	1	0.61749	unclassified Oscillibacter_msp_0861	Oscillibacter	Oscillospiraceae	Clostridiales	Clostridia	Firmicutes	Bacteria
msp_0862	-0.000127069	0.00022781	0.576992	2	0	1.54446e-07	0.6618	0	1	NA	NA	NA	NA	NA	61.1338	NA	NA	NA	NA	38.8662	NA	NA	NA	NA	NA	NA	NA	NA	NA	NA	NA	NA	NA	1	0.900782	unclassified Muribaculaceae_msp_0862	unclassified Muribaculaceae	Muribaculaceae	Bacteroidales	Bacteroidia	Bacteroidetes	Bacteria
msp_0863	0.00152057	0.00238837	0.524348	4	8.71366e-06	2.05621e-05	0.355344	34.211	1.52001	64.9241	NA	NA	NA	NA	NA	NA	NA	NA	NA	NA	NA	NA	NA	NA	NA	NA	24.3318	NA	NA	10.1379	0.60626	NA	NA	1	0.889367	unclassified Lachnospiraceae_msp_0863	unclassified Lachnospiraceae	Lachnospiraceae	Clostridiales	Clostridia	Firmicutes	Bacteria
msp_0864	0.000909504	0.000608124	0.134761	7	1.01052e-06	1.34222e-06	0.0184477	49.1519	1.96664	NA	7.81659	6.44199	NA	NA	15.1873	25.7922	NA	NA	NA	30.7454	NA	NA	13.4413	NA	NA	0.575129	NA	NA	NA	NA	NA	NA	NA	1	0.579472	unclassified_msp_0864	unclassified	unclassified	unclassified	unclassified	unclassified	unclassified
msp_0865	0.000101887	0.000225205	0.650969	16	2.27362e-07	2.44105e-07	0.0274763	38.555	1.62747	9.81335	2.23269	1.70008	1.13891	3.37977	3.08539	0.975274	NA	3.24201	1.8916	20.708	NA	NA	NA	NA	7.36439	NA	9.83955	4.70559	NA	10.0457	NA	10.6137	9.26401	1	0.9275	Enterobacter kobei_msp_0865	Enterobacter	Enterobacteriaceae	Enterobacterales	Gammaproteobacteria	Proteobacteria	Bacteria
msp_0866c	0.000316337	0.000612874	0.605747	2	4.41962e-07	1.93602e-06	0.224282	32.2841	1.47676	NA	NA	NA	16.4126	NA	NA	NA	NA	83.5874	NA	NA	NA	NA	NA	NA	NA	NA	NA	NA	NA	NA	NA	NA	NA	1	0.915331	Lactobacillus agilis_msp_0866c	Lactobacillus	Lactobacillaceae	Lactobacillales	Bacilli	Firmicutes	Bacteria
msp_0867	-0.000238724	0.000149538	0.110398	19	0	8.93181e-08	0.402891	0	1	1.25736	2.15479	20.3443	NA	9.97497	13.6513	1.18505	NA	5.53483	2.12778	1.71114	0.682396	NA	1.45413	0.353629	0.642406	0.622286	2.35309	34.2161	NA	1.24668	0.207137	0.280665	NA	1	0.533331	unclassified Firmicutes_msp_0867	unclassified Firmicutes	unclassified Firmicutes	unclassified Firmicutes	unclassified Firmicutes	Firmicutes	Bacteria
msp_0868	0.000752192	0.000687548	0.273946	12	2.38392e-06	2.16693e-06	0.0469064	55.1917	2.23173	15.826	8.9107	0.962644	NA	2.08092	5.83273	7.84129	NA	8.09914	5.52081	NA	NA	NA	NA	NA	NA	NA	NA	11.9928	NA	17.7455	NA	4.47696	10.7105	1	0.719022	Lachnospiraceae bacterium 2_1_46FAA_msp_0868	unclassified Lachnospiraceae	Lachnospiraceae	Clostridiales	Clostridia	Firmicutes	Bacteria
msp_0869	-0.000107231	0.000248964	0.666679	10	8.35267e-08	2.35986e-07	0.405772	12.9083	1.14821	0.905805	NA	NA	NA	NA	NA	50.7707	NA	NA	NA	7.62992	NA	NA	5.99441	NA	1.91807	3.74065	NA	NA	0.326834	7.2972	NA	0.285452	21.1309	1	0.930503	unclassified Acidaminococcaceae_msp_0869	unclassified Acidaminococcaceae	Acidaminococcaceae	Acidaminococcales	Negativicutes	Firmicutes	Bacteria
msp_0870	0.000244025	0.000465998	0.600514	6	3.20717e-07	8.1763e-07	0.391121	21.7414	1.27781	NA	NA	24.1529	NA	NA	NA	NA	NA	NA	NA	1.69574	NA	NA	2.30637	NA	0.588154	4.93734	NA	66.3195	NA	NA	NA	NA	NA	1	0.912368	unclassified Bacteroidales_msp_0870	unclassified Bacteroidales	unclassified Bacteroidales	Bacteroidales	Bacteroidia	Bacteroidetes	Bacteria
msp_0871	0.000111738	0.000159311	0.483065	20	5.8504e-08	1.13271e-07	0.301019	13.2067	1.15216	13.6261	8.03282	NA	4.36806	11.9838	27.0127	2.16191	NA	9.95437	5.04897	1.71149	NA	NA	1.94331	0.420155	0.683628	0.0377417	0.784292	7.84808	0.773675	0.620318	0.119432	1.20714	1.66205	1	0.860802	unclassified_msp_0871	unclassified	unclassified	unclassified	unclassified	unclassified	unclassified
msp_0872	-0.000642663	0.000541002	0.234868	21	0	1.09627e-06	0.53196	0	1	0.668395	0.385224	NA	0.320892	0.728366	9.51967	0.390537	NA	2.31484	47.9584	1.85108	2.28399	NA	0.531557	0.0949884	0.26944	1.18635	2.16187	24.8103	2.13582	0.511599	0.00785036	0.921306	0.947531	1	0.700934	Clostridium sp. CAG:567_msp_0872	unclassified Clostridiales	unclassified Clostridiales	Clostridiales	Clostridia	Firmicutes	Bacteria
msp_0873	0.000275087	0.000248813	0.268901	18	5.72664e-07	3.36158e-07	0.420103	80.6366	5.16438	6.03679	2.79072	NA	7.90784	9.07641	10.3077	9.53864	NA	10.6059	NA	9.38723	2.74577	NA	1.04935	2.68969	2.85315	0.457894	4.36337	7.52627	2.23069	3.86333	NA	6.56921	NA	1	0.719022	Olsenella sp. Marseille-P2300_msp_0873	Olsenella	Atopobiaceae	Coriobacteriales	Coriobacteriia	Actinobacteria	Bacteria
msp_0874	0.000453813	0.0011342	0.689069	22	1.63922e-05	8.22446e-06	8.81491e-06	70.0079	3.33421	5.36713	5.23679	5.36817	3.17711	6.17315	6.92652	5.34491	NA	6.52617	5.36556	6.07062	1.86042	NA	5.07347	3.25478	3.45904	1.12335	3.76308	7.15161	2.04211	3.53984	2.16395	4.40377	6.60847	1	0.930503	unclassified Firmicutes_msp_0874	unclassified Firmicutes	unclassified Firmicutes	unclassified Firmicutes	unclassified Firmicutes	Firmicutes	Bacteria
msp_0875	-4.16197e-05	0.00023111	0.857085	4	1.01676e-08	1.76036e-07	0.370154	4.3775	1.04578	NA	NA	NA	NA	NA	NA	NA	NA	NA	NA	44.8503	NA	NA	24.7096	NA	NA	NA	9.23387	NA	NA	NA	NA	21.2062	NA	1	0.975143	unclassified Bacteroides_msp_0875	Bacteroides	Bacteroidaceae	Bacteroidales	Bacteroidia	Bacteroidetes	Bacteria
msp_0876	-0.000426372	0.000392061	0.276809	20	1.09136e-06	8.096e-07	0.0298916	58.6316	2.4173	3.50753	3.13773	8.43483	9.1709	8.67721	12.4873	7.15557	NA	11.0047	2.01665	3.98367	NA	NA	2.1077	1.45677	1.29411	0.434343	1.74555	13.2954	3.67169	3.10289	0.721182	2.59431	NA	1	0.719022	unclassified Firmicutes_msp_0876	unclassified Firmicutes	unclassified Firmicutes	unclassified Firmicutes	unclassified Firmicutes	Firmicutes	Bacteria
msp_0877	-9.15812e-05	0.00020177	0.649909	20	1.88867e-07	1.82412e-07	0.110098	45.3701	1.8305	1.13625	2.39719	4.79121	NA	12.2248	20.3459	15.8697	NA	17.5716	NA	6.03966	0.148495	NA	2.11206	1.09229	1.12451	0.241885	1.19285	5.28951	0.295115	1.27529	1.34875	2.65599	2.84696	1	0.9275	Massiliomicrobiota timonensis_msp_0877	Massiliomicrobiota	Erysipelotrichaceae	Erysipelotrichales	Erysipelotrichia	Firmicutes	Bacteria
msp_0878	-6.99013e-05	7.36715e-05	0.34271	16	1.25862e-09	2.12275e-08	0.577175	1.04611	1.01057	0.0205573	6.71256	NA	NA	0.217191	18.1412	NA	NA	NA	NA	11.1757	0.00964292	NA	0.0950721	0.480851	1.70009	0.0152456	1.33048	54.5113	NA	1.14522	0.284741	1.66937	2.49076	1	0.778259	Bifidobacterium gallinarum == saeculare _msp_0878	Bifidobacterium	Bifidobacteriaceae	Bifidobacteriales	Actinobacteria	Actinobacteria	Bacteria
msp_0879	-0.00188004	0.000763248	0.0137698	23	1.77933e-06	2.85322e-06	0.21086	15.563	1.18431	2.87967	11.4119	8.01852	2.73775	9.86845	10.9801	3.54803	NA	12.2109	2.73976	3.98851	0.267967	0.0502803	1.90596	0.962462	0.727135	0.277411	2.34771	19.1875	0.491445	1.51378	0.396506	1.5898	1.89856	1	0.201424	unclassified Faecalibacterium_msp_0879	Faecalibacterium	Ruminococcaceae	Clostridiales	Clostridia	Firmicutes	Bacteria
msp_0880	2.18083e-05	0.000165985	0.895469	10	3.82914e-08	1.02061e-07	0.0307083	13.5048	1.15613	10.2386	NA	NA	NA	NA	NA	NA	NA	NA	3.45466	9.85142	NA	NA	21.0955	0.986105	0.730479	0.068114	NA	51.9277	0.223448	NA	1.42398	NA	NA	1	0.977649	unclassified Muribaculaceae_msp_0880	unclassified Muribaculaceae	Muribaculaceae	Bacteroidales	Bacteroidia	Bacteroidetes	Bacteria
msp_0881	-0.00109374	0.00254955	0.667927	23	0.000103007	4.32643e-05	9.81611e-14	77.4566	4.43588	4.78724	5.02912	3.75446	3.81036	5.26844	5.38593	5.0855	NA	5.46593	4.28019	5.49918	1.63589	0.42338	5.06511	4.17093	4.38879	2.22351	4.5517	5.67891	2.88142	5.40053	4.85439	5.16121	5.1979	1	0.930503	Haemophilus parainfluenzae_msp_0881	Haemophilus	Pasteurellaceae	Pasteurellales	Gammaproteobacteria	Proteobacteria	Bacteria
msp_0882c	NA	NA	NA	NA	NA	NA	NA	NA	NA	NA	NA	NA	NA	NA	NA	NA	NA	NA	NA	NA	NA	NA	NA	NA	NA	NA	NA	NA	NA	NA	NA	NA	NA	NA	NA	Candidatus Gastranaerophilus phascolarctosicola_msp_0882c	unclassified Bacteria	unclassified Bacteria	unclassified Bacteria	unclassified Bacteria	unclassified Bacteria	Bacteria
msp_0883	0.000696758	0.00032994	0.0347063	23	0	5.01961e-07	0.753086	0	1	1.8325	2.61673	2.07184	2.39933	2.89425	5.8576	3.72565	NA	9.07279	41.2432	5.9245	0.33049	0.0290615	2.36886	1.9282	1.50756	0.195127	3.45021	7.79218	0.55632	1.70547	0.314662	1.63316	0.550299	1	0.340462	Clostridium spiroforme_msp_0883	Erysipelatoclostridium	Erysipelotrichaceae	Erysipelotrichales	Erysipelotrichia	Firmicutes	Bacteria
msp_0884	0.00211143	0.00144877	0.14501	23	3.39134e-05	1.4141e-05	5.11638e-09	77.3011	4.40549	4.41127	4.66945	2.07123	2.88073	4.72366	4.58129	4.68867	NA	5.35056	5.49135	5.24115	3.88149	1.06141	4.77062	4.85458	4.34681	2.76938	5.37042	5.23011	4.28506	5.22738	4.54119	4.10327	5.44891	1	0.598079	Veillonella atypica_msp_0884	Veillonella	Veillonellaceae	Veillonellales	Negativicutes	Firmicutes	Bacteria
msp_0885	-0.000984361	0.000382553	0.0100781	22	1.34533e-06	8.54966e-07	0.000796102	60.1493	2.50937	4.17628	6.36601	8.54252	2.83838	9.46703	7.34542	4.73097	NA	7.85281	9.06724	4.47971	1.64468	NA	3.65213	1.69644	1.84809	0.48824	3.41644	9.87002	1.40484	3.0513	0.612004	2.66679	4.78266	1	0.163398	unclassified Roseburia_msp_0885	Roseburia	Lachnospiraceae	Clostridiales	Clostridia	Firmicutes	Bacteria
msp_0886	8.90859e-06	5.73268e-05	0.876506	19	0	1.33181e-08	0.635636	0	1	2.50374	4.04424	NA	NA	NA	5.71638	19.01	NA	2.61321	3.56915	0.355695	0.0499575	NA	0.828552	0.271381	0.0669994	0.32329	3.50695	51.3291	0.386827	0.656778	0.0302595	0.239893	4.49764	1	0.977649	Firmicutes bacterium CAG:449_msp_0886	unclassified Firmicutes	unclassified Firmicutes	unclassified Firmicutes	unclassified Firmicutes	Firmicutes	Bacteria
msp_0887	0.000849891	0.000346738	0.0142419	21	8.76021e-07	6.71571e-07	0.00491523	46.4901	1.86881	8.19016	2.53394	1.13785	1.12868	2.14964	4.36889	6.05889	NA	3.82122	3.26317	11.6056	NA	0.261937	9.88897	2.23539	7.91602	0.857351	10.366	7.04873	7.84182	3.64431	NA	3.48735	2.19412	1	0.201424	unclassified Clostridiales_msp_0887	unclassified Clostridiales	unclassified Clostridiales	Clostridiales	Clostridia	Firmicutes	Bacteria
msp_0888	9.80754e-05	0.000136089	0.471113	11	9.7614e-09	2.66091e-07	0.357388	0.884867	1.00893	NA	0.384423	NA	0.318755	0.337194	1.69545	NA	NA	2.61171	0.483773	NA	NA	NA	1.45971	0.229841	NA	NA	NA	91.3593	NA	0.700922	NA	0.418923	NA	1	0.852413	unclassified Prevotella_msp_0888	Prevotella	Prevotellaceae	Bacteroidales	Bacteroidia	Bacteroidetes	Bacteria
msp_0889	-3.75905e-05	0.000368376	0.918722	3	8.32329e-08	4.82925e-07	0.406589	16.684	1.20025	NA	NA	NA	NA	NA	NA	NA	NA	NA	NA	NA	NA	NA	21.7028	NA	NA	NA	NA	63.0627	NA	15.2345	NA	NA	NA	1	0.977649	unclassified Phascolarctobacterium_msp_0889	Phascolarctobacterium	Acidaminococcaceae	Acidaminococcales	Negativicutes	Firmicutes	Bacteria
msp_0890c	0.000174552	0.000165892	0.292706	20	2.59222e-07	1.50998e-07	0.889619	80.3077	5.07813	2.89715	8.07659	NA	NA	9.93084	NA	8.0561	NA	10.3581	4.45581	10.1663	1.47721	0.0808817	2.03733	5.81938	2.90641	2.72007	3.57358	9.63121	1.73862	1.17172	0.722225	7.08979	7.09068	1	0.730433	Leuconostoc mesenteroides_msp_0890c	Leuconostoc	Leuconostocaceae	Lactobacillales	Bacilli	Firmicutes	Bacteria
msp_0891	-0.000130277	0.00016703	0.435415	21	8.80995e-08	1.47239e-07	0.292618	16.6143	1.19925	7.11461	3.12395	7.47611	1.38668	11.0025	7.88651	2.05524	NA	8.45706	5.95719	2.39958	NA	NA	3.38766	1.17814	1.34623	0.534671	4.81552	16.6608	3.19034	1.15835	0.950306	0.825285	9.09327	1	0.825744	unclassified Firmicutes_msp_0891	unclassified Firmicutes	unclassified Firmicutes	unclassified Firmicutes	unclassified Firmicutes	Firmicutes	Bacteria
msp_0892	5.9932e-05	0.00151768	0.9685	12	2.17328e-05	1.117e-05	0.455232	94.1451	17.0796	10.2512	10.5473	NA	NA	NA	NA	9.66642	NA	NA	NA	9.80208	NA	0.103203	9.59369	NA	9.95379	3.72253	NA	NA	NA	8.45931	8.80259	9.04903	10.0489	1	0.98982	unclassified Eubacterium_msp_0892	Eubacterium	Eubacteriaceae	Clostridiales	Clostridia	Firmicutes	Bacteria
msp_0893	-0.00694318	0.00323248	0.0317182	23	9.69672e-05	6.6124e-05	0.00396179	46.7076	1.87644	5.735	4.88915	4.99009	2.76488	5.66324	7.22474	6.56441	NA	7.06667	3.79951	7.21924	1.42803	0.569027	5.53238	3.32951	3.24834	1.1117	4.22158	8.23357	2.33542	3.90148	1.63387	4.55264	3.98553	1	0.323691	Faecalibacterium prausnitzii 2_msp_0893	Faecalibacterium	Ruminococcaceae	Clostridiales	Clostridia	Firmicutes	Bacteria
msp_0894	0.000177239	0.00047015	0.706186	11	1.44131e-06	1.0138e-06	0.351673	79.8502	4.96283	NA	NA	8.32124	NA	6.85	1.32338	7.7112	NA	8.7424	NA	14.9418	3.98659	NA	8.0247	NA	NA	NA	13.5625	13.342	NA	13.1941	NA	NA	NA	1	0.937308	unclassified Prevotella_msp_0894	Prevotella	Prevotellaceae	Bacteroidales	Bacteroidia	Bacteroidetes	Bacteria
msp_0895	0.000611116	0.00155546	0.694406	8	1.64608e-05	9.89807e-06	0.0382903	98.2428	56.908	NA	14.6217	NA	NA	NA	NA	14.5755	NA	14.5844	1.35935	12.8438	NA	NA	14.3516	NA	NA	NA	13.4869	NA	NA	NA	NA	14.1767	NA	1	0.93157	Acetobacter sp. CAG:977_msp_0895	Acetobacter	Acetobacteraceae	Rhodospirillales	Alphaproteobacteria	Proteobacteria	Bacteria
msp_0896	7.71147e-05	0.000139371	0.580055	9	0	1.89769e-07	0.696522	0	1	NA	NA	NA	NA	NA	NA	NA	NA	NA	NA	2.93063	0.721741	NA	NA	NA	1.65685	NA	4.33349	87.2076	NA	1.76101	0.0722768	0.537961	0.778434	1	0.901272	Candidatus Methanomassiliicoccus intestinalis_msp_0896	Methanomassiliicoccus	Methanomassiliicoccaceae	Methanomassiliicoccales	Thermoplasmata	Euryarchaeota	Archaea
msp_0897	-0.000110888	0.000169486	0.512946	13	5.66341e-08	1.04031e-07	0.408951	18.6797	1.2297	31.3594	2.23363	6.58555	0.190746	NA	1.91991	0.058197	NA	NA	0.31082	1.28182	NA	NA	7.9019	0.623738	1.03653	NA	NA	27.913	NA	NA	NA	NA	18.5848	1	0.888447	Candidatus Gastranaerophilales bacterium HUM_1 _msp_0897	unclassified Bacteria	unclassified Bacteria	unclassified Bacteria	unclassified Bacteria	unclassified Bacteria	Bacteria
msp_0898	-0.00679703	0.00180779	0.000170005	23	4.04833e-05	2.10371e-05	0.000215458	63.7082	2.75545	5.99113	5.06931	4.60886	3.90066	5.42798	6.32553	5.71208	NA	6.52035	4.65809	6.65463	1.33172	0.171818	5.54117	3.78161	3.75778	1.20278	4.29513	6.9665	2.61221	4.70339	1.4608	4.53074	4.77575	0.33627	0.012141	butyrate-producing bacterium SS3_msp_0898	unclassified Clostridiales	unclassified Clostridiales	Clostridiales	Clostridia	Firmicutes	Bacteria
msp_0899	-5.9479e-05	0.000182648	0.744691	9	6.74605e-08	1.30355e-07	0.552051	24.196	1.31919	NA	NA	NA	NA	NA	19.2937	2.71278	NA	12.4901	11.9232	1.78441	NA	NA	NA	NA	1.33892	NA	NA	26.6176	NA	15.4804	NA	NA	8.35894	1	0.952226	unclassified Eubacterium_msp_0899	Eubacterium	Eubacteriaceae	Clostridiales	Clostridia	Firmicutes	Bacteria
msp_0900	-0.000106648	0.000204142	0.601376	10	0	1.48822e-07	0.697132	0	1	6.86915	1.74912	NA	NA	NA	43.022	NA	NA	29.5621	NA	4.39137	NA	NA	7.99635	3.09936	1.02661	NA	NA	NA	NA	1.59754	NA	0.686401	NA	1	0.912368	unclassified_msp_0900	unclassified	unclassified	unclassified	unclassified	unclassified	unclassified
msp_0901	1.00852e-05	7.29237e-05	0.890005	12	3.53241e-09	2.19882e-08	0.295416	4.42129	1.04626	3.1528	4.65082	NA	NA	NA	NA	NA	NA	13.4639	NA	53.6908	0.279033	NA	8.23477	10.0405	1.86291	0.395754	0.987244	2.5042	0.737288	NA	NA	NA	NA	1	0.977649	unclassified Blautia_msp_0901	Blautia	Lachnospiraceae	Clostridiales	Clostridia	Firmicutes	Bacteria
msp_0902	-0.000132562	0.000116282	0.254286	14	1.04278e-08	4.7515e-08	0.474575	4.85103	1.05098	0.226509	12.4751	NA	NA	NA	45.6515	NA	NA	27.7739	2.35079	0.989536	NA	NA	2.50166	0.065645	5.80341	NA	0.452387	NA	0.509535	0.671747	0.0555513	0.472671	NA	1	0.707423	unclassified Firmicutes_msp_0902	unclassified Firmicutes	unclassified Firmicutes	unclassified Firmicutes	unclassified Firmicutes	Firmicutes	Bacteria
msp_0903	-0.00115938	0.00189976	0.541679	22	3.77338e-05	2.27792e-05	0.00125676	55.0472	2.22456	6.2039	5.3503	4.26893	2.98829	5.30937	7.08056	5.96637	NA	7.00442	4.84643	6.82468	1.13292	NA	5.6388	3.23421	3.52646	0.810673	4.34706	7.85748	2.04948	4.40046	1.68794	4.81968	4.65159	1	0.891291	Oscillibacter sp. 57_20_msp_0903	Oscillibacter	Oscillospiraceae	Clostridiales	Clostridia	Firmicutes	Bacteria
msp_0904	-0.000324105	0.000347656	0.351203	22	8.94116e-07	6.94385e-07	0.00390732	45.7606	1.84368	8.18479	3.46147	7.34785	2.33141	5.56124	9.3443	3.2511	NA	7.86027	6.57736	4.53605	1.13577	NA	2.85995	2.12788	0.929592	0.8001	5.74961	12.2493	1.57315	2.11593	1.10206	3.05702	7.84376	1	0.781351	unclassified Clostridiales_msp_0904	unclassified Clostridiales	unclassified Clostridiales	Clostridiales	Clostridia	Firmicutes	Bacteria
msp_0905c	4.93019e-05	5.69513e-05	0.386663	2	0	8.53963e-07	0.438322	0	1	NA	NA	NA	NA	NA	NA	NA	NA	NA	NA	0.269293	NA	NA	NA	NA	NA	NA	NA	99.7307	NA	NA	NA	NA	NA	1	0.79432	Treponema succinifaciens_msp_0905c	Treponema	Spirochaetaceae	Spirochaetales	Spirochaetia	Spirochaetes	Bacteria
msp_0906	-0.00269312	0.00104365	0.00986648	23	8.23705e-06	6.64664e-06	0.044551	38.5114	1.62632	7.44718	4.38707	2.32213	2.47956	5.9635	6.66785	5.87709	NA	7.60716	4.52364	8.15179	0.941143	0.197723	4.91981	3.33568	3.46804	0.676625	4.42196	9.80333	1.58061	5.12872	1.14963	3.9692	4.98056	1	0.161288	Clostridium sp. 2789STDY5834924_msp_0906	unclassified Clostridiales	unclassified Clostridiales	Clostridiales	Clostridia	Firmicutes	Bacteria
msp_0907	-0.000539676	0.000432081	0.211659	21	1.07822e-06	9.07108e-07	0.164713	47.9093	1.91973	0.778489	4.71922	0.633442	12.2909	15.736	5.62936	0.595236	NA	3.74632	12.7038	1.0228	0.108441	NA	0.407916	0.538905	3.28036	0.0738986	7.45953	14.6418	1.68417	1.79503	NA	5.30934	6.84503	1	0.683507	Clostridium sp. CAG:465_msp_0907	unclassified Clostridiales	unclassified Clostridiales	Clostridiales	Clostridia	Firmicutes	Bacteria
msp_0908	0.000505954	0.000636572	0.426724	23	4.66603e-06	2.59168e-06	0.000137635	60.1809	2.51136	5.17385	4.75014	4.59421	3.29383	6.14477	7.39052	5.89801	NA	7.10691	5.15853	6.5175	1.36531	0.639962	4.72376	3.73602	2.91364	1.01432	4.42071	7.08149	2.14322	4.18771	1.81774	4.4612	5.46663	1	0.821261	unclassified_msp_0908	unclassified	unclassified	unclassified	unclassified	unclassified	unclassified
msp_0909	-0.000163054	0.000152678	0.285538	18	2.4921e-08	1.01634e-07	0.188436	5.93862	1.06314	16.6494	NA	5.40623	0.233016	3.43161	2.45736	2.17058	NA	7.21377	0.132499	11.1565	0.294348	NA	1.30816	0.354003	0.887531	NA	2.93495	20.5281	0.383705	6.01825	NA	NA	18.4399	1	0.72689	Clostridium sp. CAG:768_msp_0909	unclassified Clostridiales	unclassified Clostridiales	Clostridiales	Clostridia	Firmicutes	Bacteria
msp_0910	-0.000290293	0.000815348	0.721814	18	3.43543e-06	2.98427e-06	0.112278	86.9691	7.67409	1.11422	6.796	NA	NA	NA	19.1701	19.1611	NA	NA	NA	5.21826	0.787151	0.199033	2.6543	4.14971	1.70156	0.644413	3.5805	13.5913	0.252397	3.04453	1.6496	3.01349	13.2723	1	0.945188	Bifidobacterium catenulatum_msp_0910	Bifidobacterium	Bifidobacteriaceae	Bifidobacteriales	Actinobacteria	Actinobacteria	Bacteria
msp_0911	-4.05424e-05	3.53644e-05	0.251621	16	0	6.06256e-09	0.189548	0	1	5.12231	NA	NA	NA	NA	12.1571	1.58902	NA	6.12654	2.71656	0.178728	NA	NA	0.412889	0.243153	0.478921	NA	0.284354	69.2404	0.0159886	0.203364	0.141838	0.477765	0.611025	1	0.707423	unclassified Firmicutes_msp_0911	unclassified Firmicutes	unclassified Firmicutes	unclassified Firmicutes	unclassified Firmicutes	Firmicutes	Bacteria
msp_0912	3.77408e-05	9.24576e-05	0.68313	10	0	3.36589e-08	0.550896	0	1	NA	NA	NA	NA	NA	NA	NA	NA	NA	NA	6.01481	0.134268	NA	12.7692	1.16536	NA	NA	13.7574	45.5554	NA	4.70653	0.249152	5.72628	9.92151	1	0.930503	unclassified Clostridiales_msp_0912	unclassified Clostridiales	unclassified Clostridiales	Clostridiales	Clostridia	Firmicutes	Bacteria
msp_0913	0.000118314	0.000142114	0.405111	6	0	7.18002e-08	0.630693	0	1	NA	NA	NA	NA	NA	NA	NA	NA	NA	NA	16.8654	NA	NA	4.16103	NA	NA	NA	2.95726	43.6273	NA	11.7658	NA	NA	20.6231	1	0.808534	unclassified_msp_0913	unclassified	unclassified	unclassified	unclassified	unclassified	unclassified
msp_0914	0.000204684	0.000130221	0.115991	14	2.32676e-08	7.6479e-08	0.484915	9.95337	1.11054	3.54562	7.24379	11.2248	NA	NA	NA	NA	NA	NA	NA	21.7033	0.092755	NA	6.00764	2.67008	10.4311	0.0633674	3.16536	12.2466	NA	5.54558	NA	2.20498	13.8549	1	0.548035	unclassified Firmicutes_msp_0914	unclassified Firmicutes	unclassified Firmicutes	unclassified Firmicutes	unclassified Firmicutes	Firmicutes	Bacteria
msp_0915c	-0.000295332	0.00273152	0.9139	2	7.52837e-06	3.5097e-05	0.230878	30.3352	1.43544	NA	NA	NA	NA	NA	NA	NA	NA	NA	NA	81.5717	NA	NA	NA	18.4283	NA	NA	NA	NA	NA	NA	NA	NA	NA	1	0.977649	unclassified Candidatus Gastranaerophilales_msp_0915c	Candidatus Gastranaerophilales	Candidatus Gastranaerophilales	Candidatus Gastranaerophilales	Candidatus Melainabacteria	Candidatus Melainabacteria	Bacteria
msp_0916	3.46978e-05	0.000262829	0.894971	20	3.97457e-07	3.05313e-07	0.139945	67.6805	3.09411	0.299329	15.2937	NA	1.30004	10.2973	16.6559	7.41106	NA	16.1004	5.49887	15.4901	0.275552	0.141664	0.582992	0.497556	1.62693	0.151022	1.50699	4.00596	0.249617	0.674228	NA	NA	1.94091	1	0.977649	Bifidobacterium animalis_msp_0916	Bifidobacterium	Bifidobacteriaceae	Bifidobacteriales	Actinobacteria	Actinobacteria	Bacteria
msp_0917	0.000329395	0.00153374	0.82995	22	2.07962e-05	1.47825e-05	0.0113426	46.1043	1.85543	5.84011	3.99502	5.46511	2.93094	5.24327	7.70417	4.88599	NA	7.32797	4.2834	6.74364	1.1654	NA	4.64534	1.98001	2.63405	0.681912	4.81502	9.05857	3.59845	4.49485	3.47703	3.8878	5.14194	1	0.969091	unclassified Firmicutes_msp_0917	unclassified Firmicutes	unclassified Firmicutes	unclassified Firmicutes	unclassified Firmicutes	Firmicutes	Bacteria
msp_0918	-9.27605e-05	0.000488546	0.849411	13	9.23189e-07	9.72597e-07	0.568598	40.3526	1.67652	13.182	NA	17.9959	NA	17.4572	NA	12.7742	NA	17.7564	1.90168	12.6013	NA	NA	1.31283	0.085731	NA	0.0439257	1.71594	2.75616	0.416701	NA	NA	NA	NA	1	0.971154	unclassified Prevotella_msp_0918	Prevotella	Prevotellaceae	Bacteroidales	Bacteroidia	Bacteroidetes	Bacteria
msp_0919	-2.01877e-05	0.000437686	0.963212	5	2.59585e-07	6.39653e-07	0.236751	27.1464	1.37262	46.6216	NA	NA	7.5824	NA	25.4489	NA	NA	NA	NA	NA	NA	NA	NA	NA	NA	NA	1.24184	19.1053	NA	NA	NA	NA	NA	1	0.989304	unclassified Sutterella_msp_0919	Sutterella	Sutterellaceae	Burkholderiales	Betaproteobacteria	Proteobacteria	Bacteria
msp_0920	2.36126e-05	0.00026848	0.929917	7	1.86061e-07	2.70346e-07	0.141397	41.2656	1.70258	22.9383	NA	NA	NA	NA	NA	NA	NA	27.0898	NA	14.7287	NA	NA	5.07775	10.8842	3.72536	NA	NA	15.5558	NA	NA	NA	NA	NA	1	0.981001	unclassified Bacteroidales_msp_0920	unclassified Bacteroidales	unclassified Bacteroidales	Bacteroidales	Bacteroidia	Bacteroidetes	Bacteria
msp_0921	8.96258e-06	0.000140735	0.949222	11	1.95142e-08	7.70116e-08	0.473822	7.8702	1.08543	10.9509	8.50431	NA	NA	NA	NA	NA	NA	NA	NA	1.71048	NA	NA	NA	0.299927	0.833262	1.42976	5.75919	50.6671	NA	1.83147	NA	0.516556	17.4971	1	0.985644	unclassified Clostridiales_msp_0921	unclassified Clostridiales	unclassified Clostridiales	Clostridiales	Clostridia	Firmicutes	Bacteria
msp_0922	1.88584e-05	9.50723e-05	0.842765	17	0	4.35196e-08	0.533461	0	1	0.264518	0.637302	9.15392	0.105084	NA	10.3771	3.09069	NA	1.31802	0.336439	4.12711	NA	NA	0.230654	0.0361524	1.19019	0.00561862	NA	68.3645	NA	0.455152	0.0211296	0.286462	NA	1	0.969276	unclassified Firmicutes_msp_0922	unclassified Firmicutes	unclassified Firmicutes	unclassified Firmicutes	unclassified Firmicutes	Firmicutes	Bacteria
msp_0923	0.00115579	0.000912028	0.205057	2	0	4.02323e-06	0.889707	0	1	NA	NA	17.7809	NA	NA	NA	NA	NA	82.2191	NA	NA	NA	NA	NA	NA	NA	NA	NA	NA	NA	NA	NA	NA	NA	1	0.674803	Veillonella seminalis_msp_0923	Veillonella	Veillonellaceae	Veillonellales	Negativicutes	Firmicutes	Bacteria
msp_0924	0.000227631	0.000479729	0.635144	13	2.94438e-07	8.57758e-07	0.0309191	8.83228	1.09688	0.89476	59.5503	NA	NA	NA	NA	NA	NA	NA	NA	2.09747	7.81895	NA	0.449115	0.8828	0.8132	0.107032	1.50368	NA	0.33607	0.817429	NA	0.786319	23.9429	1	0.926509	Methanobrevibacter smithii 2_msp_0924	Methanobrevibacter	Methanobacteriaceae	Methanobacteriales	Methanobacteria	Euryarchaeota	Archaea
msp_0925	0.00117311	0.000395238	0.0029963	21	1.2713e-06	8.86088e-07	0.0051901	61.6548	2.60789	1.60297	0.585386	6.06712	NA	4.43989	4.65207	6.10882	NA	6.92732	10.1496	11.6127	0.906493	NA	3.70119	1.45087	5.5535	2.81281	2.76362	6.92028	3.4845	2.82426	0.963461	5.1795	11.2937	1	0.0817855	Lactobacillus gasseri 2_msp_0925	Lactobacillus	Lactobacillaceae	Lactobacillales	Bacilli	Firmicutes	Bacteria
msp_0926	9.67612e-05	0.000155509	0.533797	19	2.3388e-07	1.38502e-07	0.00307103	70.3346	3.37094	4.32569	7.15255	1.41969	3.029	2.29825	9.49721	4.03293	NA	5.56047	NA	9.82148	1.01454	NA	8.18442	7.15883	2.31458	NA	1.81245	8.58121	4.90509	6.43918	NA	6.44591	6.00651	1	0.890207	unclassified Dialister_msp_0926	Dialister	Veillonellaceae	Veillonellales	Negativicutes	Firmicutes	Bacteria
msp_0927	-0.000114644	0.000169795	0.499553	13	0	1.39303e-07	0.679038	0	1	1.9871	NA	NA	NA	NA	NA	NA	NA	NA	NA	4.60108	NA	NA	14.2136	0.203592	0.764372	0.214014	1.33982	70.7652	0.251947	0.711016	0.840749	3.05718	1.05037	1	0.874439	unclassified Coprobacillus_msp_0927	Coprobacillus	Erysipelotrichaceae	Erysipelotrichales	Erysipelotrichia	Firmicutes	Bacteria
msp_0928	1.71041e-05	8.12806e-05	0.83333	18	0	2.76142e-08	0.821289	0	1	39.5791	12.1359	NA	2.89558	7.99669	NA	5.8405	NA	5.34781	0.205338	0.458668	NA	NA	1.50933	0.246055	0.361442	0.665365	1.10557	13.1071	0.670387	0.855333	NA	1.11705	5.90281	1	0.969276	unclassified_msp_0928	unclassified	unclassified	unclassified	unclassified	unclassified	unclassified
msp_0929	0.00032533	0.000109717	0.00302506	15	0	4.59561e-08	0.490459	0	1	NA	12.5293	NA	NA	NA	NA	43.3652	NA	NA	18.9658	1.55846	NA	NA	1.61442	0.289209	0.318365	0.129998	0.461364	10.1557	0.133768	3.87552	0.142691	5.60723	0.852965	1	0.0817855	unclassified_msp_0929	unclassified	unclassified	unclassified	unclassified	unclassified	unclassified
msp_0930	-0.00418414	0.000935105	7.65847e-06	23	8.0673e-06	5.52513e-06	0.00130075	45.9571	1.85038	5.99294	4.9517	3.97817	2.93387	5.37893	6.80365	5.97474	NA	6.86607	4.04011	7.76755	1.2694	0.15071	5.6733	3.63191	3.79192	1.05178	4.28056	7.79592	2.20239	4.8978	1.31897	4.04249	5.20513	0.0151485	0.00189356	unclassified Lachnospiraceae_msp_0930	unclassified Lachnospiraceae	Lachnospiraceae	Clostridiales	Clostridia	Firmicutes	Bacteria
msp_0931	-0.000740974	0.000411857	0.0720018	22	7.53242e-07	8.71082e-07	0.112824	26.0234	1.35178	2.2525	5.73558	9.61402	2.11238	7.5866	13.9077	4.6656	NA	9.55404	5.00062	3.83247	1.29509	NA	2.21075	0.838894	0.969822	0.237213	1.70324	16.7873	0.769828	1.17277	0.296729	2.38742	7.06939	1	0.449806	unclassified Clostridiales_msp_0931	unclassified Clostridiales	unclassified Clostridiales	Clostridiales	Clostridia	Firmicutes	Bacteria
msp_0932	-0.000486608	0.000315318	0.122776	22	6.86237e-08	4.42221e-07	0.75954	2.99776	1.0309	2.1904	2.03418	5.87369	0.630199	11.2336	27.7254	4.73906	NA	10.801	3.33829	2.0877	0.134159	NA	1.28181	0.441213	0.56267	0.251928	1.82028	15.9257	0.979753	0.778479	0.29167	0.954732	5.92406	1	0.558277	unclassified Firmicutes_msp_0932	unclassified Firmicutes	unclassified Firmicutes	unclassified Firmicutes	unclassified Firmicutes	Firmicutes	Bacteria
msp_0933	-0.000174823	0.000240241	0.466799	18	4.1874e-07	3.05391e-07	0.0400281	56.7488	2.31208	1.20491	4.33044	6.86703	7.11807	1.19525	3.60596	4.56885	NA	5.56161	4.73062	8.85569	NA	NA	11.7758	NA	9.05205	0.479652	10.8805	3.86315	NA	12.265	NA	0.464117	3.18129	1	0.852379	unclassified Blautia_msp_0933	Blautia	Lachnospiraceae	Clostridiales	Clostridia	Firmicutes	Bacteria
msp_0934	0.00010054	0.000626644	0.872533	4	1.85563e-07	1.23696e-06	0.312159	11.046	1.12418	NA	NA	NA	NA	NA	NA	NA	NA	NA	NA	38.1478	NA	NA	19.9141	NA	37.0377	NA	4.90043	NA	NA	NA	NA	NA	NA	1	0.977649	Bacteroides salanitronis_msp_0934	Bacteroides	Bacteroidaceae	Bacteroidales	Bacteroidia	Bacteroidetes	Bacteria
msp_0935	0.000779812	0.00025593	0.00231155	16	5.11896e-07	3.49117e-07	0.00448396	62.3294	2.65459	5.73815	1.91905	5.72292	NA	9.90426	NA	10.6118	NA	11.4884	NA	NA	4.00588	NA	4.63978	NA	6.34504	0.677868	4.02861	9.18209	8.45445	9.14747	3.41551	4.71875	NA	1	0.0703423	Peptostreptococcus anaerobius_msp_0935	Peptostreptococcus	Peptostreptococcaceae	Clostridiales	Clostridia	Firmicutes	Bacteria
msp_0936c	NA	NA	NA	NA	NA	NA	NA	NA	NA	NA	NA	NA	NA	NA	NA	NA	NA	NA	NA	NA	NA	NA	NA	NA	NA	NA	NA	NA	NA	NA	NA	NA	NA	NA	NA	Helicobacter winghamensis_msp_0936c	Helicobacter	Helicobacteraceae	Campylobacterales	Epsilonproteobacteria	Proteobacteria	Bacteria
msp_0937	0.000179316	0.000133075	0.177827	13	4.58104e-08	6.85051e-08	0.353232	27.3662	1.37677	12.9835	NA	NA	NA	25.6477	NA	11.3092	NA	29.6541	NA	2.2182	NA	NA	1.20587	0.692323	0.457751	0.586901	5.63828	4.20831	NA	4.29869	NA	1.09922	NA	1	0.645398	unclassified Burkholderiales_msp_0937	unclassified Burkholderiales	unclassified Burkholderiales	Burkholderiales	Betaproteobacteria	Proteobacteria	Bacteria
msp_0938	-8.3039e-05	0.000250442	0.740214	17	1.19259e-07	2.52112e-07	0.357833	12.8261	1.14713	2.9244	0.256697	4.22571	1.99938	1.61117	NA	NA	NA	45.7877	NA	2.19858	NA	NA	1.67198	0.35161	0.25703	0.193007	5.6395	4.74957	NA	0.774279	0.0868843	7.93392	19.3386	1	0.950857	Firmicutes bacterium CAG:536_msp_0938	unclassified Erysipelotrichales	unclassified Erysipelotrichales	Erysipelotrichales	Erysipelotrichia	Firmicutes	Bacteria
msp_0939	3.43249e-05	8.74505e-05	0.694684	17	5.49793e-09	2.94338e-08	0.774835	3.91928	1.04079	1.45452	2.21244	NA	0.397337	NA	32.6631	6.80146	NA	28.8931	NA	4.82336	NA	NA	1.64682	1.39344	1.06731	0.0303378	0.694116	5.95277	NA	0.718414	0.0379895	1.75046	9.46306	1	0.93157	unclassified_msp_0939	unclassified	unclassified	unclassified	unclassified	unclassified	unclassified
msp_0940	0.000194542	0.000182122	0.285431	10	0	2.66755e-07	0.396068	0	1	0.650379	NA	NA	NA	NA	NA	NA	NA	NA	NA	3.84998	NA	NA	3.97015	1.52463	0.483665	NA	1.32605	83.0268	NA	0.288918	NA	1.979	2.9004	1	0.72689	unclassified Eggerthella_msp_0940	Eggerthella	Eggerthellaceae	Eggerthellales	Coriobacteriia	Actinobacteria	Bacteria
msp_0941	-0.000155871	0.000122081	0.201678	16	6.86879e-08	6.63518e-08	0.773611	42.6426	1.74345	NA	11.5293	NA	NA	NA	13.8847	5.0045	NA	15.9816	1.26671	2.03683	NA	NA	2.48754	0.60405	3.6577	0.323208	2.10131	17.5273	NA	4.99234	0.159753	3.02545	15.4177	1	0.670293	unclassified_msp_0941	unclassified	unclassified	unclassified	unclassified	unclassified	unclassified
msp_0942	0.000214715	0.000227684	0.345661	21	9.29061e-08	2.05438e-07	0.13527	9.63859	1.10667	0.468493	1.29705	4.59426	NA	18.8808	42.6636	10.2941	NA	7.47186	6.63996	0.989523	0.314799	NA	0.50691	0.166537	0.262187	0.0527776	0.554423	2.69619	0.149187	0.352944	0.104074	0.602507	0.937906	1	0.779209	unclassified Eggerthellaceae_msp_0942	unclassified Eggerthellaceae	Eggerthellaceae	Eggerthellales	Coriobacteriia	Actinobacteria	Bacteria
msp_0943	5.10974e-05	4.94222e-05	0.301185	17	0	1.00896e-08	0.465622	0	1	1.55928	NA	NA	1.42741	NA	2.91326	18.1956	NA	8.04649	2.36446	0.124296	0.0068969	NA	0.224095	0.0800779	0.216232	0.0846673	0.670033	63.6486	0.0202247	0.318949	NA	0.0993949	NA	1	0.734584	unclassified_msp_0943	unclassified	unclassified	unclassified	unclassified	unclassified	unclassified
msp_0944	-6.38668e-06	6.83506e-05	0.925554	18	0	1.54302e-08	0.741356	0	1	0.9396	NA	NA	0.429094	NA	48.6887	12.2672	NA	32.3099	NA	0.271841	0.277753	NA	0.152052	0.0778762	0.0991575	0.0498091	0.125072	2.9561	0.139207	0.422466	0.166154	0.20683	0.42127	1	0.977649	unclassified_msp_0944	unclassified	unclassified	unclassified	unclassified	unclassified	unclassified
msp_0945	-0.00176485	0.000747981	0.0183	22	5.47098e-06	3.50701e-06	0.00458385	51.0427	2.0426	5.25223	5.02514	4.94112	3.4697	6.42581	6.91199	4.54058	NA	6.83527	6.61831	6.65978	1.47563	NA	4.97656	3.36591	3.38182	0.698227	5.25464	8.17646	1.40443	4.29506	1.03892	3.92899	5.32344	1	0.23009	unclassified Coprococcus_msp_0945	Coprococcus	Lachnospiraceae	Clostridiales	Clostridia	Firmicutes	Bacteria
msp_0946	-0.000317393	0.000561281	0.571747	20	2.01932e-06	1.87676e-06	0.0593992	36.5754	1.57667	2.50188	3.88556	3.03055	3.02299	2.03678	5.80758	4.05184	NA	5.89075	3.75415	11.3301	NA	NA	4.81065	NA	5.41435	4.04945	7.35819	10.7948	6.56774	4.88512	3.41728	2.69808	4.69219	1	0.900763	Collinsella intestinalis_msp_0946	Collinsella	Coriobacteriaceae	Coriobacteriales	Coriobacteriia	Actinobacteria	Bacteria
msp_0947	-0.00180669	0.000680633	0.00794428	22	3.33914e-06	2.68398e-06	0.0356347	52.1413	2.08948	5.4941	3.65902	4.35307	1.2321	4.28955	8.1463	4.36362	NA	6.21309	5.58913	4.40541	0.917451	NA	4.692	2.8402	1.55765	1.91408	13.0073	12.502	3.61432	2.74185	0.802414	3.48621	4.17918	1	0.144163	Clostridium sp. 26_22_msp_0947	unclassified Clostridiales	unclassified Clostridiales	Clostridiales	Clostridia	Firmicutes	Bacteria
msp_0948	0.000159222	0.00025195	0.527415	15	4.45012e-07	3.04221e-07	0.599762	68.2208	3.14672	11.1499	NA	NA	NA	12.5794	NA	12.6659	NA	NA	8.03988	3.38957	0.562344	NA	8.42426	4.5422	0.450409	NA	9.69214	12.7539	0.778664	4.07453	NA	0.771977	10.1249	1	0.889367	unclassified Prevotella_msp_0948	Prevotella	Prevotellaceae	Bacteroidales	Bacteroidia	Bacteroidetes	Bacteria
msp_0949	-0.000159948	0.000253311	0.527759	22	5.13728e-07	3.47675e-07	0.0140709	58.6986	2.42123	2.4995	4.09958	8.50619	3.86809	3.24011	9.60965	11.2131	NA	10.9057	10.8895	4.58011	0.282459	NA	3.50134	2.71549	1.29185	0.381837	2.02306	8.8672	0.790494	1.57309	0.478147	1.19674	7.48675	1	0.889367	unclassified Erysipelotrichaceae_msp_0949	unclassified Erysipelotrichaceae	Erysipelotrichaceae	Erysipelotrichales	Erysipelotrichia	Firmicutes	Bacteria
msp_0950c	3.17485e-05	0.00016165	0.844295	22	1.38579e-07	1.42872e-07	0.0192249	29.0925	1.41029	5.78946	6.44507	4.25374	4.82216	8.31013	9.00342	12.437	NA	8.62122	3.61981	3.27346	0.257862	NA	1.50936	0.879096	1.97237	0.263203	1.5285	9.94808	2.79693	2.82201	0.346688	0.989158	10.1113	1	0.969276	Sanguibacteroides justesenii == Gabonibacter massiliensis_msp_0950c	Sanguibacteroides	Porphyromonadaceae	Bacteroidales	Bacteroidia	Bacteroidetes	Bacteria
msp_0951	-0.000146939	9.35794e-05	0.116367	14	0	2.8583e-08	0.53022	0	1	5.87978	NA	NA	NA	NA	NA	1.22331	NA	38.5341	1.63481	1.65912	NA	NA	0.3834	1.64004	0.0519469	NA	0.76836	45.7487	0.0859205	1.75978	0.0274705	0.603193	NA	1	0.548035	unclassified Alistipes_msp_0951	Alistipes	Rikenellaceae	Bacteroidales	Bacteroidia	Bacteroidetes	Bacteria
msp_0952	3.24424e-05	0.000139992	0.816736	6	2.6992e-08	6.93206e-08	0.66328	22.8029	1.29539	44.2582	NA	NA	NA	NA	NA	NA	NA	NA	NA	NA	NA	NA	NA	NA	NA	0.461925	12.4084	NA	NA	15.2135	NA	6.58188	21.0761	1	0.963879	Agathobaculum desmolans_msp_0952	Agathobaculum	Ruminococcaceae	Clostridiales	Clostridia	Firmicutes	Bacteria
msp_0953	-0.000285678	0.000311334	0.358833	22	6.79314e-07	5.3453e-07	0.0852808	43.0052	1.75455	4.17293	10.405	10.1315	5.76156	9.6391	9.62328	2.43514	NA	8.94534	2.81656	2.89803	3.9557	NA	2.53476	0.656513	0.81662	0.628605	4.06379	10.7076	0.473591	2.09336	1.01411	1.63489	4.59201	1	0.781434	unclassified Ruminococcaceae_msp_0953	unclassified Ruminococcaceae	Ruminococcaceae	Clostridiales	Clostridia	Firmicutes	Bacteria
msp_0954	-0.000105478	0.000178865	0.555387	6	6.4009e-08	1.12141e-07	0.244155	37.0138	1.58765	13.9729	NA	NA	NA	NA	NA	NA	NA	NA	NA	28.1685	NA	NA	33.5953	NA	3.3522	NA	NA	NA	NA	5.84197	NA	NA	15.0692	1	0.891291	unclassified Burkholderiales_msp_0954	unclassified Burkholderiales	unclassified Burkholderiales	Burkholderiales	Betaproteobacteria	Proteobacteria	Bacteria
msp_0955	-0.000307336	0.00081138	0.70485	19	7.65818e-06	3.79019e-06	0.0110259	95.9363	24.6082	6.64555	8.49532	NA	NA	NA	8.43083	5.66488	NA	8.26706	7.71643	2.84008	4.87919	NA	4.25959	1.21389	1.55701	3.6697	8.49627	8.5803	2.44277	3.8251	0.906195	6.10448	6.00538	1	0.936329	Firmicutes bacterium CAG:345_msp_0955	unclassified Firmicutes	unclassified Firmicutes	unclassified Firmicutes	unclassified Firmicutes	Firmicutes	Bacteria
msp_0956	5.75922e-05	0.00108539	0.957683	6	3.99112e-06	3.98834e-06	0.254095	86.4449	7.37732	NA	NA	2.50637	NA	2.32238	28.9692	12.9319	NA	27.0874	26.1828	NA	NA	NA	NA	NA	NA	NA	NA	NA	NA	NA	NA	NA	NA	1	0.988135	unclassified Fusobacterium_msp_0956	Fusobacterium	Fusobacteriaceae	Fusobacteriales	Fusobacteriia	Fusobacteria	Bacteria
msp_0957	1.0992e-05	5.44121e-05	0.839906	14	1.63736e-09	1.01951e-08	0.412781	3.41635	1.03537	13.0687	NA	NA	NA	NA	36.9712	0.6535	NA	1.76357	6.21013	1.67904	NA	NA	0.858904	0.221457	NA	NA	1.05912	35.0737	0.656488	1.08417	0.0884697	0.611527	NA	1	0.969276	unclassified Firmicutes_msp_0957	unclassified Firmicutes	unclassified Firmicutes	unclassified Firmicutes	unclassified Firmicutes	Firmicutes	Bacteria
msp_0958	9.51429e-05	0.000160836	0.55415	5	0	9.18255e-08	0.466456	0	1	NA	NA	58.8673	NA	NA	NA	NA	NA	NA	NA	25.0237	NA	NA	10.5452	NA	NA	4.25392	1.30987	NA	NA	NA	NA	NA	NA	1	0.891291	unclassified Flavonifractor_msp_0958	Flavonifractor	unclassified Clostridiales	Clostridiales	Clostridia	Firmicutes	Bacteria
msp_0959	-0.00174729	0.000528217	0.000939991	23	1.06007e-06	1.55768e-06	0.143436	18.5306	1.22746	4.36258	3.58712	5.68626	1.7499	7.18602	10.0535	4.39332	NA	7.85421	4.32239	5.54687	1.0551	0.495367	3.74724	1.94487	2.19822	0.593995	2.38816	14.6838	1.05486	3.25548	0.78549	2.26334	10.7919	1	0.0387355	unclassified_msp_0959	unclassified	unclassified	unclassified	unclassified	unclassified	unclassified
msp_0960	3.42399e-05	0.000148535	0.817689	18	4.50168e-08	8.36617e-08	0.028862	13.9601	1.16225	5.46628	NA	NA	NA	NA	24.2873	26.012	NA	23.9317	6.31221	3.00798	0.276968	0.0220074	2.57319	0.300136	0.219052	0.0818427	0.962773	NA	1.0728	2.53646	0.143025	0.911482	1.88279	1	0.963879	unclassified_msp_0960	unclassified	unclassified	unclassified	unclassified	unclassified	unclassified
msp_0961	-0.000908288	0.000454764	0.0457955	21	7.97318e-07	1.08979e-06	0.21462	21.668	1.27662	2.7788	2.25867	4.19639	0.471541	5.4257	6.10967	5.62688	NA	6.7318	13.3763	3.32596	0.293403	NA	7.93414	2.18743	1.31285	0.531763	8.21912	17.4536	NA	3.14052	1.15728	2.74114	4.72705	1	0.371244	unclassified Clostridiales_msp_0961	unclassified Clostridiales	unclassified Clostridiales	Clostridiales	Clostridia	Firmicutes	Bacteria
msp_0962	-5.67145e-05	0.000777593	0.941857	9	2.53523e-06	2.50486e-06	0.111058	60.2859	2.518	NA	NA	NA	NA	NA	11.2789	11.6857	NA	15.6742	NA	15.257	NA	NA	3.96886	NA	NA	NA	8.87988	22.9407	NA	8.3076	NA	2.00723	NA	1	0.985644	unclassified Anaerotruncus_msp_0962	Anaerotruncus	Ruminococcaceae	Clostridiales	Clostridia	Firmicutes	Bacteria
msp_0963c	-4.19265e-06	5.11018e-05	0.934611	16	0	1.12314e-08	0.675998	0	1	4.1597	11.3045	0.20586	2.12584	6.41326	44.9822	0.575687	NA	3.31383	4.81123	3.41884	0.288154	NA	NA	1.04548	0.960493	NA	NA	9.54206	NA	6.09981	NA	NA	0.753073	1	0.98206	Campylobacter hominis_msp_0963c	Campylobacter	Campylobacteraceae	Campylobacterales	Epsilonproteobacteria	Proteobacteria	Bacteria
msp_0964	6.93461e-05	0.000593955	0.907056	18	2.11568e-06	1.71038e-06	0.237117	55.2308	2.23368	4.72684	4.55302	NA	0.821077	14.5154	8.44216	6.28229	NA	11.8064	14.3285	2.78179	0.504199	NA	2.04046	3.18145	6.22597	NA	0.672661	14.5985	NA	1.44343	0.241681	2.83412	NA	1	0.977649	Clostridium sp. CAG:571_msp_0964	unclassified Clostridiales	unclassified Clostridiales	Clostridiales	Clostridia	Firmicutes	Bacteria
msp_0965	-7.19186e-05	0.00012163	0.554326	19	2.84727e-08	5.89854e-08	0.632251	11.6258	1.13155	1.01849	5.46719	4.07366	1.49118	8.41714	17.7495	NA	NA	14.4977	0.337825	0.84552	NA	NA	0.342589	0.105225	0.198446	0.234425	11.9444	31.7455	0.769304	0.311409	0.286019	0.164471	NA	1	0.891291	unclassified Oscillibacter_msp_0965	Oscillibacter	Oscillospiraceae	Clostridiales	Clostridia	Firmicutes	Bacteria
msp_0966	1.07929e-05	0.000159927	0.946194	15	1.44051e-07	1.15048e-07	0.198327	59.756	2.48484	15.1678	11.3474	NA	3.06529	10.3096	15.077	NA	NA	13.2479	4.7371	2.33093	NA	NA	NA	0.437068	3.60883	NA	1.34783	15.4723	NA	2.11845	0.153435	1.57909	NA	1	0.985644	unclassified Clostridiales_msp_0966	unclassified Clostridiales	unclassified Clostridiales	Clostridiales	Clostridia	Firmicutes	Bacteria
msp_0967	-8.53233e-05	0.000144739	0.555528	19	0	9.04481e-08	0.69908	0	1	6.6798	5.58704	0.481859	0.332407	17.5097	5.54826	NA	NA	28.1949	4.1866	2.74554	1.25015	NA	2.0988	0.906141	1.50263	NA	1.68858	6.97884	0.181811	13.7138	0.275343	0.137858	NA	1	0.891291	unclassified Sutterella_msp_0967	Sutterella	Sutterellaceae	Burkholderiales	Betaproteobacteria	Proteobacteria	Bacteria
msp_0968c	-0.000123846	0.000184455	0.501955	4	2.5392e-08	1.23494e-07	0.296841	14.259	1.1663	NA	NA	6.61698	NA	25.2967	NA	NA	NA	3.54219	NA	NA	NA	NA	64.5441	NA	NA	NA	NA	NA	NA	NA	NA	NA	NA	1	0.877866	Veillonella magna_msp_0968c	Veillonella	Veillonellaceae	Veillonellales	Negativicutes	Firmicutes	Bacteria
msp_0969	0.000152905	0.000191608	0.424863	19	2.79845e-07	1.94027e-07	0.102282	55.6703	2.25582	5.92266	8.93744	9.59573	4.93819	6.98133	9.2565	11.6624	NA	6.35989	NA	6.31126	0.997144	NA	0.88804	0.66781	0.977404	0.120585	1.46378	8.04956	0.944081	5.37589	NA	10.5503	NA	1	0.821261	Olsenella sp. Marseille-P2912_msp_0969	Olsenella	Atopobiaceae	Coriobacteriales	Coriobacteriia	Actinobacteria	Bacteria
msp_0970	0.000122737	0.000113534	0.27967	20	0	5.23944e-08	0.432338	0	1	0.234476	0.366044	2.27268	4.40843	3.58066	NA	62.4241	NA	19.9718	NA	0.526578	0.0506806	NA	0.383956	0.0619941	0.116519	0.0263026	0.158807	1.26397	0.125905	0.213544	0.0515676	0.202936	3.55905	1	0.721971	Collinsella bouchesdurhonensis_msp_0970	Collinsella	Coriobacteriaceae	Coriobacteriales	Coriobacteriia	Actinobacteria	Bacteria
msp_0971	1.19226e-05	0.000126034	0.924634	11	2.85038e-08	5.98818e-08	0.335511	18.2324	1.22298	NA	7.447	NA	5.89687	0.201623	26.4	2.7485	NA	2.38805	1.01398	29.0208	NA	NA	NA	NA	NA	NA	NA	18.1403	NA	NA	NA	2.01446	4.72846	1	0.977649	Bacteroides sartorii_msp_0971	Bacteroides	Bacteroidaceae	Bacteroidales	Bacteroidia	Bacteroidetes	Bacteria
msp_0972	-3.52783e-05	0.000163371	0.829035	3	1.70599e-08	9.81918e-08	0.33283	15.8633	1.18854	NA	NA	6.98276	NA	NA	24.7021	NA	NA	68.3152	NA	NA	NA	NA	NA	NA	NA	NA	NA	NA	NA	NA	NA	NA	NA	1	0.969091	unclassified Prevotellaceae_msp_0972	unclassified Prevotellaceae	Prevotellaceae	Bacteroidales	Bacteroidia	Bacteroidetes	Bacteria
msp_0973	3.08732e-05	0.000172228	0.857736	12	4.69095e-08	1.20063e-07	0.412119	13.6796	1.15848	9.77213	NA	NA	NA	NA	NA	NA	NA	NA	NA	17.4921	0.727448	NA	5.6346	10.1107	1.37523	2.13845	6.44297	37.3463	NA	1.86868	1.52176	5.56966	NA	1	0.975143	unclassified Firmicutes_msp_0973	unclassified Firmicutes	unclassified Firmicutes	unclassified Firmicutes	unclassified Firmicutes	Firmicutes	Bacteria
msp_0974c	0.000587528	0.000344482	0.0880939	20	1.07818e-06	7.13038e-07	0.0021317	58.6236	2.41684	3.62262	3.81637	2.74716	5.11437	4.78862	8.5618	6.97299	NA	7.94292	NA	10.3953	2.79206	NA	4.53293	5.27969	4.83976	1.22003	3.86232	7.49226	3.05718	5.31461	2.31425	5.33278	NA	1	0.493364	Gemella sanguinis_msp_0974c	Gemella	unclassified Bacillales	Bacillales	Bacilli	Firmicutes	Bacteria
msp_0975	5.86839e-05	0.000356661	0.869309	5	2.86056e-07	4.26211e-07	0.182713	51.1818	2.04842	NA	NA	NA	NA	NA	NA	NA	NA	NA	NA	26.4051	NA	NA	22.2828	NA	11.5613	NA	NA	NA	NA	36.1386	3.61217	NA	NA	1	0.97754	unclassified_msp_0975	unclassified	unclassified	unclassified	unclassified	unclassified	unclassified
msp_0976	-0.000136662	0.000198228	0.490561	22	1.30681e-07	1.87741e-07	0.357172	18.438	1.22606	1.92848	3.83744	8.08178	6.83093	11.4231	13.6519	4.05298	NA	13.2581	5.39421	1.77956	0.151817	NA	1.12327	0.476252	0.47786	0.111825	2.36486	18.762	0.460925	0.701793	0.131774	0.834494	4.16457	1	0.868693	unclassified Firmicutes_msp_0976	unclassified Firmicutes	unclassified Firmicutes	unclassified Firmicutes	unclassified Firmicutes	Firmicutes	Bacteria
msp_0977	0.0014122	0.000884257	0.110256	23	1.07104e-05	5.07676e-06	5.59016e-08	70.1593	3.35113	5.79989	4.97303	5.37982	3.18148	5.72143	6.2876	5.49479	NA	6.0859	4.41661	6.04036	1.17026	0.730344	5.24608	3.99843	3.82995	1.09359	4.71723	6.40346	2.49387	4.56317	1.93859	5.1872	5.2469	1	0.533331	Flavonifractor sp. 2789STDY5834895 _msp_0977	Flavonifractor	unclassified Clostridiales	Clostridiales	Clostridia	Firmicutes	Bacteria
msp_0978	0.000238518	0.000300888	0.427943	14	8.37443e-08	3.95767e-07	0.588272	6.50039	1.06952	26.0731	NA	NA	NA	NA	NA	NA	NA	NA	NA	7.37954	0.791153	NA	12.9613	1.34739	1.87206	0.330827	5.24583	15.2626	1.67227	7.35415	7.38068	8.76866	3.56046	1	0.821261	unclassified Firmicutes_msp_0978	unclassified Firmicutes	unclassified Firmicutes	unclassified Firmicutes	unclassified Firmicutes	Firmicutes	Bacteria
msp_0979	-0.00047117	0.000312361	0.131448	22	0	4.53839e-07	0.709652	0	1	2.63179	3.6483	3.15455	0.930469	5.08448	19.6787	2.96097	NA	14.8861	2.73212	4.88403	0.241949	NA	3.33874	1.08475	1.08414	0.239881	4.99417	20.6065	0.633162	1.49604	0.307562	1.54592	3.83562	1	0.568938	unclassified Clostridiales_msp_0979	unclassified Clostridiales	unclassified Clostridiales	Clostridiales	Clostridia	Firmicutes	Bacteria
msp_0980	1.20133e-05	0.000211534	0.954711	9	0	1.76991e-07	0.812486	0	1	28.4104	NA	NA	NA	6.39093	NA	NA	NA	25.6052	NA	10.1601	NA	NA	NA	8.07171	4.03229	NA	NA	2.90557	NA	6.3933	NA	NA	8.03041	1	0.98737	unclassified Prevotella_msp_0980	Prevotella	Prevotellaceae	Bacteroidales	Bacteroidia	Bacteroidetes	Bacteria
msp_0981	-0.000539779	0.000275564	0.0501342	19	0	3.12049e-07	0.673139	0	1	1.05758	0.231989	4.31801	3.05404	2.8053	14.8082	10.3501	NA	6.06506	NA	2.00499	0.193454	NA	0.984029	1.00533	1.51931	0.0875831	NA	14.3772	NA	0.727475	0.306845	0.388796	35.7147	1	0.385857	unclassified Holdemanella_msp_0981	Holdemanella	Erysipelotrichaceae	Erysipelotrichales	Erysipelotrichia	Firmicutes	Bacteria
msp_0982	1.53274e-05	0.000115247	0.894197	19	6.31998e-08	6.17317e-08	0.0654945	39.4914	1.65266	12.3564	9.09991	NA	5.64846	10.0416	16.6581	NA	NA	18.3614	5.50599	1.86167	0.189769	NA	1.34607	0.175649	0.279456	0.108736	0.88068	5.05973	4.09538	6.82851	NA	0.831896	0.670646	1	0.977649	unclassified_msp_0982	unclassified	unclassified	unclassified	unclassified	unclassified	unclassified
msp_0983	4.24506e-05	0.000390625	0.913461	19	8.56315e-07	7.16351e-07	0.03161	66.1383	2.95319	2.99616	15.1104	1.8769	NA	17.6439	3.99887	2.62844	NA	16.0487	NA	NA	0.241039	0.12615	1.27555	3.70437	NA	1.29616	4.88278	6.31469	3.37944	4.58164	0.109021	1.51245	12.2733	1	0.977649	Streptococcus lutetiensis_msp_0983	Streptococcus	Streptococcaceae	Lactobacillales	Bacilli	Firmicutes	Bacteria
msp_0984	9.55927e-05	0.000281036	0.733748	10	4.13258e-07	3.36905e-07	0.0991934	64.4535	2.81321	NA	14.7005	NA	NA	12.6781	15.2273	15.5581	NA	NA	NA	7.94479	NA	NA	11.699	NA	3.3599	4.05499	NA	14.4825	NA	NA	0.294768	NA	NA	1	0.947934	unclassified Burkholderiales_msp_0984	unclassified Burkholderiales	unclassified Burkholderiales	Burkholderiales	Betaproteobacteria	Proteobacteria	Bacteria
msp_0985	-0.000462023	0.00070388	0.51157	19	3.58517e-06	2.63177e-06	0.0411589	69.0939	3.23561	1.84662	6.38869	NA	0.617162	7.52689	6.05045	5.54472	NA	6.91211	6.02167	2.82893	1.25428	NA	1.15523	9.97755	2.46452	NA	7.72975	13.1062	3.01769	3.19973	NA	0.89343	13.4644	1	0.886841	Mycoplasma sp. CAG:472_msp_0985	Mycoplasma	Mycoplasmataceae	Mycoplasmatales	Mollicutes	Tenericutes	Bacteria
msp_0986	-0.0011538	0.00144794	0.425532	23	3.28048e-05	1.40431e-05	2.08434e-10	77.3618	4.41732	4.68315	4.67423	4.75007	3.29175	5.119	5.64705	5.24027	NA	5.59338	4.96193	5.84523	2.60945	1.25125	5.06313	3.77029	4.23243	1.63357	4.51123	5.87022	3.50127	4.5814	3.22238	4.6625	5.28481	1	0.821261	Coprococcus catus_msp_0986	Coprococcus	Lachnospiraceae	Clostridiales	Clostridia	Firmicutes	Bacteria
msp_0987	0.000139864	0.000139874	0.317346	12	0	7.42206e-08	0.492064	0	1	2.95193	NA	NA	NA	18.2984	16.3984	NA	NA	46.0739	2.41321	2.21673	NA	NA	3.16759	NA	NA	0.0628831	0.87707	3.70525	0.0547897	NA	NA	3.77988	NA	1	0.751749	unclassified Bacteroides_msp_0987	Bacteroides	Bacteroidaceae	Bacteroidales	Bacteroidia	Bacteroidetes	Bacteria
msp_0988	-0.000632367	0.000441229	0.151802	22	1.3693e-06	1.15245e-06	0.048056	38.8276	1.63472	8.77105	1.89472	2.31651	0.724311	3.15619	4.98072	3.82946	NA	4.7621	2.12569	6.61926	2.31646	NA	5.1491	3.96031	2.52349	1.69717	8.18796	8.35093	1.39678	8.12279	4.9207	3.01585	11.1784	1	0.607823	unclassified Oscillibacter_msp_0988	Oscillibacter	Oscillospiraceae	Clostridiales	Clostridia	Firmicutes	Bacteria
msp_0989	-2.00652e-05	0.000411277	0.961089	8	2.22028e-07	6.35907e-07	0.209126	15.8882	1.18889	18.8968	2.86935	NA	NA	NA	NA	12.7633	NA	NA	NA	3.33768	NA	NA	6.17599	NA	0.286039	NA	NA	NA	NA	9.48019	NA	NA	46.1907	1	0.989271	unclassified Coprococcus_msp_0989	Coprococcus	Lachnospiraceae	Clostridiales	Clostridia	Firmicutes	Bacteria
msp_0990	-9.62742e-05	0.000170565	0.572452	20	3.74092e-08	1.40382e-07	0.0861621	6.50949	1.06963	19.8418	3.17193	NA	1.28989	9.19796	8.37631	12.3797	NA	7.30839	2.92754	3.66639	0.855244	NA	1.34328	1.22614	1.83296	0.231247	0.935179	11.8067	NA	3.28249	0.268047	0.833745	9.22506	1	0.900763	unclassified_msp_0990	unclassified	unclassified	unclassified	unclassified	unclassified	unclassified
msp_0991	0.000764588	0.000700858	0.275304	7	8.48785e-07	1.73581e-06	0.467334	27.9015	1.38699	41.4655	NA	NA	NA	NA	NA	NA	NA	NA	NA	29.7539	NA	NA	7.04991	NA	2.91057	2.82608	NA	NA	NA	7.44586	NA	8.54822	NA	1	0.719022	unclassified Bacteroidales_msp_0991	unclassified Bacteroidales	unclassified Bacteroidales	Bacteroidales	Bacteroidia	Bacteroidetes	Bacteria
msp_0992	1.76468e-05	7.42424e-05	0.812121	15	0	2.11326e-08	0.691018	0	1	24.0072	10.0113	NA	NA	32.8408	7.05754	NA	NA	4.21722	NA	0.714489	NA	NA	0.13475	1.10641	0.0608106	0.368435	0.147426	7.98472	NA	10.9104	0.312552	0.125919	NA	1	0.963879	unclassified Euryarchaeota_msp_0992	unclassified Euryarchaeota	unclassified Euryarchaeota	unclassified Euryarchaeota	unclassified Euryarchaeota	Euryarchaeota	Archaea
msp_0993	-0.000248028	0.000409307	0.544534	20	1.11703e-06	8.36279e-07	0.195997	58.1227	2.38793	3.52344	11.6291	NA	0.598086	10.3571	8.03559	3.51526	NA	4.79067	12.922	1.79085	0.358569	NA	2.40685	0.586952	4.15528	1.29241	5.53027	11.8019	NA	0.856767	0.157012	1.56551	14.1264	1	0.891291	unclassified Clostridiales_msp_0993	unclassified Clostridiales	unclassified Clostridiales	Clostridiales	Clostridia	Firmicutes	Bacteria
msp_0994	6.30542e-05	0.000148827	0.671803	7	0	8.03119e-08	0.552355	0	1	34.6717	NA	NA	NA	NA	NA	NA	NA	NA	5.96177	11.1495	NA	NA	11.2548	4.5302	NA	NA	3.99914	28.433	NA	NA	NA	NA	NA	1	0.930503	unclassified Selenomonas_msp_0994	Selenomonas	Selenomonadaceae	Selenomonadales	Negativicutes	Firmicutes	Bacteria
msp_0995	-7.2309e-05	0.000158578	0.648402	11	2.74436e-08	1.02526e-07	0.645182	9.29238	1.10244	NA	4.65958	NA	NA	7.38683	NA	NA	NA	14.4967	9.19347	NA	NA	NA	7.2625	NA	2.02633	0.228837	NA	43.5092	NA	2.43753	NA	1.28832	7.51075	1	0.9275	unclassified Lachnospiraceae_msp_0995	unclassified Lachnospiraceae	Lachnospiraceae	Clostridiales	Clostridia	Firmicutes	Bacteria
msp_0996	-0.000142576	0.000134495	0.289104	18	2.58694e-08	7.78334e-08	0.135706	8.05838	1.08765	3.38066	9.15093	3.54439	NA	36.6283	4.48606	3.37399	NA	7.70797	0.588826	3.34888	NA	NA	1.19236	0.711841	0.357962	0.20681	0.761766	15.6821	NA	0.734411	NA	4.98699	3.15577	1	0.727594	unclassified Firmicutes_msp_0996	unclassified Firmicutes	unclassified Firmicutes	unclassified Firmicutes	unclassified Firmicutes	Firmicutes	Bacteria
msp_0997	-0.000321447	0.000546528	0.556424	6	6.3571e-07	1.02665e-06	0.300946	46.9071	1.88349	NA	9.42503	NA	NA	39.9388	NA	6.98003	NA	6.14028	4.2565	NA	NA	NA	33.2593	NA	NA	NA	NA	NA	NA	NA	NA	NA	NA	1	0.891291	unclassified Prevotella_msp_0997	Prevotella	Prevotellaceae	Bacteroidales	Bacteroidia	Bacteroidetes	Bacteria
msp_0998	-5.16898e-05	0.000191275	0.786977	7	1.71673e-08	1.30696e-07	0.481309	5.75002	1.06101	NA	NA	NA	NA	NA	NA	NA	NA	NA	NA	10.9042	NA	NA	NA	0.692271	4.1505	NA	25.553	46.7946	NA	4.45827	NA	7.44722	NA	1	0.960102	unclassified Brachyspira_msp_0998	Brachyspira	Brachyspiraceae	Brachyspirales	Spirochaetia	Spirochaetes	Bacteria
msp_0999	0.000220707	0.000208364	0.289493	13	0	1.85622e-07	0.83947	0	1	1.97544	11.5314	NA	NA	4.55019	NA	NA	NA	NA	NA	19.3896	0.235565	NA	12.3942	NA	8.37904	2.91928	3.47433	13.0095	NA	19.7279	0.142299	NA	2.27125	1	0.727594	Collinsella stercoris_msp_0999	Collinsella	Coriobacteriaceae	Coriobacteriales	Coriobacteriia	Actinobacteria	Bacteria
msp_1000	-8.49251e-06	6.96973e-05	0.903019	12	5.7697e-09	1.69023e-08	0.263772	9.96657	1.1107	22.1616	NA	1.37717	NA	22.7456	NA	NA	NA	NA	NA	0.611996	NA	NA	2.84919	0.772395	NA	NA	1.02827	40.9563	0.0860471	NA	0.411172	6.05037	0.949891	1	0.977649	unclassified Bacteroides_msp_1000	Bacteroides	Bacteroidaceae	Bacteroidales	Bacteroidia	Bacteroidetes	Bacteria
msp_1001	4.16145e-05	0.00025634	0.871037	21	7.21808e-07	3.678e-07	0.0396219	88.8508	8.96927	3.41618	8.26461	8.49007	7.85598	7.72984	8.76157	8.15806	NA	9.06058	8.10417	3.50178	0.580365	NA	2.55482	0.811379	0.993678	0.200599	2.3563	8.53798	1.53609	1.53515	NA	2.72815	4.82265	1	0.977649	unclassified_msp_1001	unclassified	unclassified	unclassified	unclassified	unclassified	unclassified
msp_1002	0.000148068	0.000602994	0.806027	9	1.48214e-06	1.34059e-06	0.352711	77.2435	4.39435	NA	NA	NA	NA	NA	19.2028	23.7115	NA	NA	NA	NA	0.520345	NA	20.8297	NA	NA	NA	2.36755	21.9256	NA	6.6981	0.764849	NA	3.97955	1	0.963879	unclassified Clostridiales_msp_1002	unclassified Clostridiales	unclassified Clostridiales	Clostridiales	Clostridia	Firmicutes	Bacteria
msp_1003	-0.000112892	0.000124435	0.364281	13	0	6.16646e-08	0.780728	0	1	10.1745	NA	NA	0.0869216	0.699198	1.52592	NA	NA	15.6542	0.0347643	1.10901	0.0148123	NA	4.91538	NA	0.114182	NA	NA	56.1484	NA	9.07119	0.451545	NA	NA	1	0.781434	Eubacterium sp. CAG:841_msp_1003	Eubacterium	Eubacteriaceae	Clostridiales	Clostridia	Firmicutes	Bacteria
msp_1004	-4.3281e-05	0.000281719	0.8779	14	1.68402e-07	3.00837e-07	0.107794	18.892	1.23292	1.50002	NA	NA	NA	NA	NA	27.1614	NA	30.5779	NA	3.39936	NA	NA	13.1167	1.04041	0.3154	NA	3.78724	9.78661	7.51467	0.475492	0.028269	0.267357	1.0292	1	0.977649	unclassified Clostridiales_msp_1004	unclassified Clostridiales	unclassified Clostridiales	Clostridiales	Clostridia	Firmicutes	Bacteria
msp_1005	4.15041e-05	0.00115503	0.971335	19	1.34977e-05	7.27315e-06	0.00419251	92.5345	13.395	2.84044	NA	9.57554	7.95756	NA	9.83507	8.00175	NA	7.47701	9.50079	4.23138	0.0994201	NA	4.57838	1.88369	1.04293	NA	3.53894	9.75831	3.10204	2.09879	0.224542	5.71418	8.53922	1	0.990872	Clostridium sp. CAG:508_msp_1005	unclassified Clostridiales	unclassified Clostridiales	Clostridiales	Clostridia	Firmicutes	Bacteria
msp_1006	0.000761318	0.000409015	0.0626952	22	1.54163e-06	1.01857e-06	0.00897472	61.863	2.62212	0.525321	4.68327	3.06417	3.3474	8.20281	2.91787	4.41336	NA	7.92946	6.31685	10.7698	2.50947	NA	6.16205	4.60197	5.15198	3.85772	2.79632	5.39709	1.28876	2.78733	1.08959	5.66664	6.52078	1	0.43342	Lactobacillus fermentum_msp_1006	Lactobacillus	Lactobacillaceae	Lactobacillales	Bacilli	Firmicutes	Bacteria
msp_1007	-9.18643e-05	0.000245443	0.708197	7	1.24956e-07	2.2121e-07	0.183032	32.1334	1.47348	23.7985	NA	NA	NA	NA	NA	NA	NA	NA	NA	3.63193	NA	NA	26.3571	12.3301	9.36836	NA	21.239	NA	NA	NA	3.27502	NA	NA	1	0.937626	Coprobacillus sp. CAG:698_msp_1007	Coprobacillus	Erysipelotrichaceae	Erysipelotrichales	Erysipelotrichia	Firmicutes	Bacteria
msp_1008	0.000135524	0.000378603	0.720375	16	1.12946e-06	7.48632e-07	0.364859	71.9111	3.56013	11.4485	6.91029	NA	6.45608	NA	12.2263	6.82096	NA	NA	NA	6.31888	4.11385	NA	4.91525	1.2894	4.18616	1.07786	6.49199	8.26357	NA	11.2579	NA	7.84273	0.380273	1	0.945188	unclassified Firmicutes_msp_1008	unclassified Firmicutes	unclassified Firmicutes	unclassified Firmicutes	unclassified Firmicutes	Firmicutes	Bacteria
msp_1009	-0.000157635	0.000509173	0.756872	22	1.23824e-06	1.46255e-06	0.177157	25.177	1.33649	3.38203	4.86197	5.90027	3.18418	5.33573	13.0574	5.56533	NA	11.9783	5.54522	6.1739	0.573306	NA	3.4453	1.55651	1.9256	0.250142	2.71898	9.91172	2.04342	2.42062	0.726561	3.07368	6.36984	1	0.955598	Senegalimassilia anaerobia_msp_1009	Senegalimassilia	Coriobacteriaceae	Coriobacteriales	Coriobacteriia	Actinobacteria	Bacteria
msp_1010	-0.000293028	0.000247206	0.235875	12	2.71093e-07	2.67806e-07	0.0607563	56.1656	2.28131	5.32965	NA	NA	NA	NA	17.3493	NA	NA	21.9506	NA	11.5564	0.432393	NA	NA	NA	3.14902	2.29323	4.75023	NA	4.97266	7.26984	NA	8.11854	12.8281	1	0.700934	unclassified Clostridiales_msp_1010	unclassified Clostridiales	unclassified Clostridiales	Clostridiales	Clostridia	Firmicutes	Bacteria
msp_1011	-0.0017201	0.00155678	0.269197	8	1.18347e-05	9.93095e-06	0.00118996	93.4953	15.3736	20.1664	NA	NA	NA	NA	NA	NA	NA	NA	NA	11.7569	7.71629	NA	15.3816	9.30798	7.23834	NA	20.34	NA	NA	8.09251	NA	NA	NA	1	0.719022	Clostridium sp. CAG:557_msp_1011	unclassified Clostridiales	unclassified Clostridiales	Clostridiales	Clostridia	Firmicutes	Bacteria
msp_1012	0.00106035	0.000777729	0.172759	22	7.82791e-06	3.89076e-06	3.98764e-05	70.2905	3.36592	4.9852	5.12528	5.94593	4.33879	6.10626	6.74158	6.46557	NA	6.64743	4.6981	6.0173	3.67567	NA	4.68366	2.90745	3.50282	0.686779	4.27874	7.03589	3.28898	3.78175	1.38679	3.73777	3.96227	1	0.638724	Intestinimonas massiliensis_msp_1012	Intestinimonas	unclassified Clostridiales	Clostridiales	Clostridia	Firmicutes	Bacteria
msp_1013	0.00102915	0.000421159	0.0145408	22	1.11615e-06	9.76596e-07	0.0747297	38.7281	1.63207	2.75308	3.35524	10.8145	1.3398	5.10699	13.0727	6.07199	NA	10.2877	10.6823	7.68388	0.711529	NA	2.68275	1.6813	1.60728	0.374054	1.48087	5.92156	2.34471	1.73951	3.4388	4.03215	2.8173	1	0.203983	unclassified Firmicutes_msp_1013	unclassified Firmicutes	unclassified Firmicutes	unclassified Firmicutes	unclassified Firmicutes	Firmicutes	Bacteria
msp_1014	-0.000586104	0.000398297	0.14115	5	0	5.5079e-07	0.570501	0	1	4.15319	NA	NA	NA	NA	NA	NA	NA	NA	NA	22.2171	NA	NA	NA	16.7203	NA	NA	NA	11.6345	NA	NA	NA	NA	45.2749	1	0.590643	unclassified Prevotella_msp_1014	Prevotella	Prevotellaceae	Bacteroidales	Bacteroidia	Bacteroidetes	Bacteria
msp_1016	7.44079e-05	0.00016705	0.656015	17	8.92883e-08	1.16416e-07	0.827608	27.4664	1.37867	0.874939	6.29893	6.56513	NA	NA	14.3273	22.176	NA	10.2972	NA	2.43555	1.35459	NA	1.14358	0.113154	3.28164	0.305218	3.81204	24.3852	NA	2.00131	0.210971	0.417249	NA	1	0.928181	unclassified Firmicutes_msp_1016	unclassified Firmicutes	unclassified Firmicutes	unclassified Firmicutes	unclassified Firmicutes	Firmicutes	Bacteria
msp_1017	4.28607e-05	7.98219e-05	0.591299	16	1.62117e-08	2.78919e-08	0.220247	18.0783	1.22068	2.50901	14.9792	8.72784	NA	7.91033	19.0718	NA	NA	NA	NA	6.65156	0.0845746	NA	0.856742	1.61402	0.732026	0.184195	0.887331	16.7712	NA	0.901131	NA	4.93283	13.1863	1	0.90873	unclassified Clostridiaceae_msp_1017	unclassified Clostridiaceae	Clostridiaceae	Clostridiales	Clostridia	Firmicutes	Bacteria
msp_1018	1.96675e-05	0.000430291	0.963543	11	5.26067e-07	7.57557e-07	0.187501	30.6404	1.44176	13.5173	NA	NA	NA	NA	12.5707	NA	NA	NA	3.03808	12.98	NA	NA	3.08755	3.9047	3.22221	0.751771	NA	22.8989	3.31624	20.7125	NA	NA	NA	1	0.989304	Candidatus Methanomethylophilus alvus _msp_1018	Candidatus Methanomethylophilus	Methanomassiliicoccaceae	Methanomassiliicoccales	Thermoplasmata	Euryarchaeota	Archaea
msp_1019	-0.000290243	0.000163339	0.0755787	20	0	1.1636e-07	0.156046	0	1	7.33474	0.484216	0.728297	0.15548	0.706603	3.30558	3.41649	NA	1.46943	0.51915	7.81946	NA	NA	6.78305	0.695851	1.62332	0.439945	45.3012	11.7172	2.79416	1.60702	NA	1.51654	1.58226	1	0.455047	Oxalobacter formigenes 1_msp_1019	Oxalobacter	Oxalobacteraceae	Burkholderiales	Betaproteobacteria	Proteobacteria	Bacteria
msp_1020	-0.000135151	0.000338886	0.690035	11	3.9151e-07	5.02884e-07	0.19596	40.1414	1.6706	9.44492	NA	NA	NA	NA	11.4686	6.56084	NA	NA	NA	11.1603	NA	NA	6.29251	4.82742	2.07874	NA	8.62545	28.9315	NA	3.24005	NA	7.36962	NA	1	0.930503	unclassified Clostridiales_msp_1020	unclassified Clostridiales	unclassified Clostridiales	Clostridiales	Clostridia	Firmicutes	Bacteria
msp_1021	-0.00190188	0.000845264	0.0244462	22	6.13146e-06	4.3268e-06	0.00342652	47.7196	1.91276	5.83023	5.9206	4.84783	2.64938	7.5177	8.54495	5.63938	NA	8.41763	3.48071	6.78041	1.31093	NA	4.67563	2.11683	2.61109	0.608388	3.99814	9.47371	1.7647	3.74084	1.06422	3.72337	5.28334	1	0.282775	unclassified Clostridiales_msp_1021	unclassified Clostridiales	unclassified Clostridiales	Clostridiales	Clostridia	Firmicutes	Bacteria
msp_1022	-5.14169e-05	0.00017277	0.766006	22	2.5613e-08	1.39622e-07	0.31888	3.84605	1.04	2.06796	4.44305	11.4305	0.493613	9.07447	10.8362	2.08457	NA	13.7437	10.0975	1.39594	0.164503	NA	1.80166	0.434523	0.560599	0.0825786	0.989016	19.3526	0.605861	0.656935	0.14081	1.93917	7.60429	1	0.960102	unclassified_msp_1022	unclassified	unclassified	unclassified	unclassified	unclassified	unclassified
msp_1023	0.000153009	0.000128544	0.233919	8	0	5.62138e-08	0.887764	0	1	39.312	NA	NA	NA	27.7338	NA	NA	NA	NA	NA	4.2288	NA	NA	NA	1.81299	3.87671	0.135774	20.4107	NA	NA	NA	NA	2.48928	NA	1	0.700934	unclassified Candidatus Gastranaerophilales_msp_1023	Candidatus Gastranaerophilales	Candidatus Gastranaerophilales	Candidatus Gastranaerophilales	Candidatus Melainabacteria	Candidatus Melainabacteria	Bacteria
msp_1024	-0.000240448	0.000956635	0.801545	5	2.59982e-06	3.14478e-06	0.125017	79.398	4.8539	NA	NA	NA	NA	NA	NA	NA	NA	NA	NA	34.7495	NA	NA	30.7633	NA	10.0727	NA	13.5941	NA	NA	NA	NA	10.8204	NA	1	0.963528	unclassified Negativicutes_msp_1024	unclassified Negativicutes	unclassified Negativicutes	unclassified Negativicutes	Negativicutes	Firmicutes	Bacteria
msp_1025	-0.000678746	0.000945944	0.473046	3	1.62896e-06	2.78108e-06	0.0915949	64.9106	2.84986	NA	NA	NA	NA	NA	NA	NA	NA	NA	NA	51.274	NA	NA	NA	NA	NA	NA	NA	34.9411	NA	NA	NA	13.7848	NA	1	0.852413	unclassified_msp_1025	unclassified	unclassified	unclassified	unclassified	unclassified	unclassified
msp_1026	4.30367e-05	0.000272479	0.8745	8	2.09382e-07	2.776e-07	0.540663	50.4693	2.01895	NA	NA	8.39696	NA	NA	31.7397	27.3383	NA	NA	NA	7.2017	NA	NA	6.37253	1.08068	5.47524	NA	12.3949	NA	NA	NA	NA	NA	NA	1	0.977649	unclassified Alistipes_msp_1026	Alistipes	Rikenellaceae	Bacteroidales	Bacteroidia	Bacteroidetes	Bacteria
msp_1027	5.1573e-05	0.000187287	0.783033	14	5.43761e-08	1.25712e-07	0.102951	12.2102	1.13909	0.575774	NA	NA	NA	9.86493	NA	6.86042	NA	25.8965	4.84226	0.184681	NA	NA	0.204703	1.26989	0.54168	NA	0.993058	48.4921	NA	0.158707	0.0197006	0.0956239	NA	1	0.960102	unclassified Clostridiales_msp_1027	unclassified Clostridiales	unclassified Clostridiales	Clostridiales	Clostridia	Firmicutes	Bacteria
msp_1028c	0.00194465	0.000657477	0.003099	11	1.70587e-06	1.80928e-06	0.000748002	60.3756	2.5237	11.5485	4.12289	NA	NA	24.9605	4.92031	NA	NA	NA	NA	NA	NA	NA	4.45901	NA	21.1583	0.386883	4.21378	11.5602	6.36193	NA	NA	6.30768	NA	1	0.0817855	Prevotella intermedia_msp_1028c	Prevotella	Prevotellaceae	Bacteroidales	Bacteroidia	Bacteroidetes	Bacteria
msp_1029	-9.33306e-05	8.51988e-05	0.273322	6	0	6.63704e-08	0.36543	0	1	NA	NA	NA	NA	4.16994	NA	NA	NA	NA	NA	1.79529	NA	NA	1.80743	0.200494	NA	NA	NA	87.2175	NA	NA	NA	4.80934	NA	1	0.719022	unclassified Clostridiales_msp_1029	unclassified Clostridiales	unclassified Clostridiales	Clostridiales	Clostridia	Firmicutes	Bacteria
msp_1030	0.000122325	0.000111035	0.270602	16	2.94119e-08	4.90897e-08	0.335454	19.7469	1.24606	9.39316	NA	11.2617	NA	24.6828	NA	NA	NA	NA	NA	4.97186	1.79226	NA	4.40742	1.09026	1.49354	1.33759	3.09242	31.3875	1.35283	1.66727	0.15158	0.653589	1.26414	1	0.719022	unclassified Clostridiales_msp_1030	unclassified Clostridiales	unclassified Clostridiales	Clostridiales	Clostridia	Firmicutes	Bacteria
[truncated: 965 more rows]

## Sheet: README
Supplemental Table S11. Meta-analysis differential abundance testing between Healthy and Disease states controlling for age and gender using MMUPHin R package.
