# Supplementary material for: Global compositional and functional states of the human gut microbiome in health and disease
Source: Genome Res. 2024 Jun;34(6):967–78. doi: 10.1101/gr.278637.123 (PMC11293553; doi:10.1101/gr.278637.123)
Supplement: Supplement 12 [file Supplemental_Table_S12.xlsx]

## Sheet: Table S12
DNA extraction	Dataset ID	PMID	DOI	BioProject	country
GNOME DNA Isolation Kit (MP Biomedicals)	id45	31171880	doi:10.1038/s41591-019-0458-7	PRJDB4176	JPN
GNOME DNA Isolation Kit (MP Biomedicals)	id11	27171425	doi:10.1371/journal.pone.0155362	PRJEB12449	USA
Qiagen QIAamp DNA Stool Mini Kit (Qiagen)	id40	29942096	doi:10.1038/s41591-018-0061-3	PRJEB14215	ITA
Qiagen QIAamp DNA Stool Mini Kit (Qiagen)	id40	29942096	doi:10.1038/s41591-018-0061-3	PRJEB14215	ESP
Standard protocol (PMID: 9212428)	id06	28655159	doi:10.1093/gigascience/gix050	PRJEB15371	CHN
-	id08	28449715	doi:10.1186/s13073-017-0428-y	PRJEB17784	GER
Standard protocol (PMID: 20171997)	id14	23719380	doi:10.1038/nature12198	PRJEB1786	SWE
Qiagen QIAamp DNA Stool Mini Kit (Qiagen)	id12	28873967	doi:10.1093/gigascience/gix058	PRJEB18755	CHN
Standard protocol (PMID: 16188921)	id17	20203603	doi:10.1038/nature08821	PRJEB2054	ESP
Standard protocol (PMID: 16188921)	id16	20203603	doi:10.1038/nature08821	PRJEB2054 3.3M catalogue duplicated with PRJEB4336	DNK
Standard protocol (IHMC)	id51	30349083	doi:10.1038/s41564-018-0257-9	PRJEB20800	DNK
Qiagen QIAamp DNA Stool Mini Kit (Qiagen)	id10	29018189	doi:10.1038/s41467-017-00900-1	PRJEB21528	CHN
Standard protocol (PMID: 9212428)	id26_id41	29097494	doi:10.1126/science.aan3706	PRJEB22863	FRA
GNOME DNA Isolation Kit (MP Biomedicals)	id44	30936547	doi:10.1038/s41591-019-0406-6	PRJEB27928	GER
PowerSoil DNA isolation kit (MoBio, Carlsbad, CA)	id43	30388453	doi:10.1016/j.cell.2018.10.029	PRJEB28687	THA
PowerSoil DNA isolation kit (MoBio, Carlsbad, CA)	id43	30388453	doi:10.1016/j.cell.2018.10.029	PRJEB28687	USA
Standard protocol (IHMC)	id27	34571050	doi:10.1016/j.jhep.2021.09.010	PRJEB38481	GBR
PowerSoil DNA isolation kit (MoBio, Carlsbad, CA)	id29	34167645	doi:10.1016/j.jacc.2021.05.006	PRJEB38483	GBR
Standard protocol (PMID: 16188921)	id25	23985870	doi:10.1038/nature12506	PRJEB4336	DNK
In-house	id20	25079328	doi:10.1038/nature13568	PRJEB6337	CHN
Standard protocol (PMID: 9212428)	id31	26214836	doi:10.1038/nm.3914	PRJEB6997	CHN
PowerSoil DNA isolation kit (MoBio, Carlsbad, CA)	id39	27818083	doi: 10.1016/j.cels.2016.10.004	PRJEB9584	GBR
Standard protocol (PMID: 20171997)	id01	23212374	doi:10.1038/ncomms2266	PRJNA177201	SWE
PowerSoil DNA isolation kit (MoBio, Carlsbad, CA)	id49	27409808	doi:10.1038/nature18927	PRJNA217052	FJI
PowerSoil DNA isolation kit (MoBio, Carlsbad, CA)	id32	27172044	doi:10.1038/ncomms7505	PRJNA268964	PER
PowerSoil DNA isolation kit (MoBio, Carlsbad, CA)	id32	27172044	doi:10.1038/ncomms7505	PRJNA268964	USA
Qiagen QIAamp DNA Stool Mini Kit (Qiagen)	id37	25981789	doi:10.1016/j.cub.2015.04.055	PRJNA278393	TAN
Qiagen QIAamp DNA Stool Mini Kit (Qiagen)	id37	25981789	doi:10.1016/j.cub.2015.04.055	PRJNA278393	ITA
PowerSoil DNA isolation kit (MoBio, Carlsbad, CA)	id35	27723761	doi:10.1038/NMICROBIOL.2016.180	PRJNA289586	LUX
Qiagen QIAamp DNA Stool Mini Kit (Qiagen)	id48	27881416	doi:10.1128/AEM.02577-16	PRJNA321753	USA
PowerSoil DNA isolation kit (MoBio, Carlsbad, CA)	id38	28073918	doi:10.1101/gr.213256.116	PRJNA327106	USA
Qiagen QIAamp DNA Stool Mini Kit (Qiagen)	id33	27708392	doi:10.1038/srep34826	PRJNA328899	MGL
Qiagen QIAamp DNA Stool Mini Kit (Qiagen)	id52	31928124	doi:10.1080/19490976.2019.1700754	PRJNA356225	CHN
Qiagen QIAamp DNA Stool Mini Kit (Qiagen)	id53	28530702	doi:10.1038/nm.4345	PRJNA361402	ESP
In-house	id07	28467925	doi:10.1016/j.cmet.2017.04.001	PRJNA373901	USA
In-house	id09	28750650	doi 10.1186/s13059-017-1271-6	PRJNA375935	CHN
-	id34	28441964	doi:10.1186/s40168-017-0261-y	PRJNA379741	USA
Qiagen QIAamp DNA Stool Mini Kit (Qiagen)	id50	30698687	doi:10.1093/gigascience/giz004	PRJNA397112	IND
In-house	id03	28923537	doi:10.1016/j.neo.2017.08.004	PRJNA397906	USA
Standard protocol (PMID: 9212428)	id02	23023125	doi:10.1038/nature11450	PRJNA422434	CHN
Qiagen QIAamp DNA Stool Mini Kit (Qiagen)	id52	30077182	doi:10.1186/s40168-018-0520-6	PRJNA431482	CHN
GNOME DNA Isolation Kit (MP Biomedicals)	id46	30936548	doi:10.1038/s41591-019-0405-7	PRJNA447983	ITA
PowerSoil DNA isolation kit (MoBio, Carlsbad, CA)	id36	28953883	doi:10.1038/nature23889	PRJNA48479	USA
PowerSoil DNA isolation kit (MoBio, Carlsbad, CA)	id42	30661755	doi:10.1016/j.cell.2019.01.001	PRJNA485056	MDG
FastDNA Kit (Qbiogene, Inc., CA)	id21	20613793	doi:10.1038/ismej.2010.92	SRP006764	FIN
Qiagen QIAamp DNA Stool Mini Kit (Qiagen)	id28	35349787	doi:10.1016/j.chom.2022.03.002	PRJEB38984	SWE
Qiagen QIAamp DNA Stool Mini Kit (Qiagen)	id100	26408641	doi:10.1136/gutjnl-2015-309800	PRJEB10878	CHN
GNOME DNA Isolation Kit (MP Biomedicals)	id101	25432777	doi:10.15252/msb.20145645	PRJEB6070	FRA
GNOME DNA Isolation Kit (MP Biomedicals)	id102	25432777	doi:10.15252/msb.20145645	PRJEB6070	GER
-	id103	25758642	doi:10.1038/ncomms7528	PRJEB7774	AUT
Qiagen QIAamp DNA Stool Mini Kit (Qiagen)	id104	31719139	doi:10.1128/mSystems.00438-19	PRJNA531273	IND

## Sheet: README
Supplemental Table S12. Summary of DNA extraction protocols of cohorts used in this study.
